# Supplementary material for: A Microarray Platform-Independent Classification Tool for Cell of Origin Class Allows Comparative Analysis of Gene Expression in Diffuse Large B-cell Lymphoma
Source: PLoS One. 2013 Feb 12;8(2):e55895. doi: 10.1371/journal.pone.0055895 (PMC3570548; doi:10.1371/journal.pone.0055895)
Supplement: Table S1 — Dataset details. This table provides details of the datasets used, showing the GEO accession number where applicable, the title of the associated publication, data set size, array type (Chip Number), presence of associated survival information (Yes/No), and the stages of the evaluation for which the data set was used. (XLSX) [file pone.0055895.s002.xlsx]

## Sheet: SelectedDatasetsFinal
GEO Code	Title	Size	ChipNumber	SurvivalInfo	ClassInfo	ClassifierSelection	ClassifierGeneSelection	Train	Test (Wright trained)	Test (10846 trained)
GSE10846	Prediction of survival in diffuse large B cell lymphoma treated with chemotherapy plus Rituximab	414	570	Yes	Yes	Yes	Yes	Yes	Yes	No
GSE12195	Mutations of multiple genes deregulate the NF-kB pathway in diffuse large B cell lymphoma	136 (73 DLBCL)	570	No	No	No	No	No	Yes	No
GSE19246	A novel method of amplification of FFPET derived-RNA enables accurate disease classification with microarrays	177 (repeats between tissue types) 118 Fresh, 59 Parafin	570	No	Yes	No	Yes	No	Yes	No
GSE22470	Translocations Activating IRF4 Identify a Subtype of Germinal-Center-Derived B-cell Lymphoma Affecting Predominantly Children and Young Adults	271	96	No	Yes	No	No	No	Yes	No
GSE22895	Deep Sequencing of the Small RNA Transcriptome of Normal and Malignant Human B cells Identifies Hundreds of Novel MicroRNAs: microarray analysis	101 DLBCL	6244	No	No	No	No	No	Yes	No
GSE31312	Development and application of a new immunophenotypic algorithm for molecular subtype classification of Diffuse Large B-Cell Lymphoma (DLBCL): Report from an International DLBCL Rituximab-CHOP Consortium Program Study	498	570	No	Yes	No	No	No	Yes	No
GSE32918 (HMDS)	Whole genome expression profiling based on paraffin embedded tissue can be used to classify diffuse large b-cell lymphoma and predict clinical outcome	249 samples (172 patients)	8432	Yes	NA	Yes	No	No	Yes	Yes
GSE34171	Integrative Analysis of a series of newly diagnosed Diffuse Large B-cell Lymphomas (DLBCLs)	91	570	No	Yes	No	No	No	Yes	No
GSE4475	A Biologic Definition of Burkitt's Lymphoma from Transcriptional and Genomic Profiling	116 DLBCL (DiseaseType==DLBCL & MolecularDiagnosis==non-mBL ). Missing 4 of the Wright classifier genes (BMF,FOXP1,NEK6,SERPINA9)!	96	Yes	Yes	No	Yes	No	Yes	Yes
Monti Et Al	Molecular profiling of diffuse large B-cell lymphoma reveals a novel disease subtype with brisk host inflammatory response and distinct genetic features	176	NA	Yes	Yes	No	No	No	Yes	Yes
	Total Size	2030
