# Supplementary material for: A Microarray Platform-Independent Classification Tool for Cell of Origin Class Allows Comparative Analysis of Gene Expression in Diffuse Large B-cell Lymphoma
Source: PLoS One. 2013 Feb 12;8(2):e55895. doi: 10.1371/journal.pone.0055895 (PMC3570548; doi:10.1371/journal.pone.0055895)
Supplement: Table S2 — Classifier genes. This table lists the original Wright et al. classifier genes and their cell of origin class association. Genes used in classifier development are shown in bold, asterisks identify Lymphochip features for which an official gene symbol was not identified. The GeneSelections work sheet shows the extended classifier gene sets which were generated and analysed (Figure 1. step 3). (XLSX) [file pone.0055895.s003.xlsx]

## Sheet: Wright
Wright classifier genes (or ID; shown with *). Those used in LMT_J48_RF100_SMO classifier are shown in bold.
LLMPP classifier genes
Gene/*ID	Class up-regulated in
FOXP1
SH3BP5
TBC1D27
IGHM
*LC32529
IRF4
PIM1
*W87820	ABC
ENTPD1
IL16
FUT8
ETV6
BLNK
CCND2
BMF
PTPN1
MME
*AA811713
*AA806638
DENND3
BCL6
NEK6	GCB
LRMP
SERPINA9
MYBL1
LMO2
ITPKB

## Sheet: GeneSelections
Wright10	Wright5	Dave185	Dave100	Dave50	Dave20	Dave10	All185	All100	All50	All20	All10
SERPINA9	SERPINA9	BCL6	BCL6	BCL6	BCL6	BCL6	BCL6	BCL6	BMF	ENTPD1	FOXP1
MME	MME	BLNK	BLNK	BLNK	CCND2	FUT8	BLNK	BMF	ENTPD1	FOXP1	LMO2
FUT8	FUT8	CCND2	CCND2	CCND2	DENND3	ITPKB	BMF	DENND3	ETV6	LMO2	MME
ENTPD1	ENTPD1	DENND3	DENND3	DENND3	ETV6	LMO2	CCND2	ENTPD1	FOXP1	MME	SERPINA9
FOXP1	FOXP1	ENTPD1	ENTPD1	ENTPD1	FUT8	MME	DENND3	ETV6	FUT8	MYBL1	ARID3A
LMO2		ETV6	ETV6	ETV6	ITPKB	SH3BP5	ENTPD1	FOXP1	LMO2	PIM1	ASB13
BCL6		FUT8	FUT8	FUT8	LMO2	BATF	ETV6	FUT8	MME	SERPINA9	PHF16
CCND2		IL16	IL16	IL16	LRMP	CYB5R2	FOXP1	ITPKB	MYBL1	TBC1D27	SSBP2
LRMP		IRF4	IRF4	IRF4	MME	PIM2	FUT8	LMO2	PIM1	ARID3A	SYTL4
ITPKB		ITPKB	ITPKB	ITPKB	PIM1	SSBP2	IGHM	LRMP	SERPINA9	ASB13	TNFRSF13B
		LMO2	LMO2	LMO2	SH3BP5		IL16	MME	SH3BP5	BCL2L10
		LRMP	LRMP	LRMP	AUTS2		IRF4	MYBL1	TBC1D27	C1ORF186
		MME	MME	MME	BATF		ITPKB	PIM1	ARID3A	CYB5R2
		PIM1	PIM1	PIM1	CYB5R2		LMO2	SERPINA9	ASB13	CYP39A1
		PTPN1	SH3BP5	SH3BP5	DOCK10		LRMP	SH3BP5	ATP6V1E2	FAM46C
		SH3BP5	ADTRP	ADTRP	KIAA0226L		MME	TBC1D27	AUTS2	PHF16
		ADTRP	AHNAK	AHNAK	LIMD1		MYBL1	ADTRP	BATF	PIM2
		AHNAK	AHR	AHR	PIM2		PIM1	ARHGEF3	BCL2L10	SSBP2
		AHR	ALOX5	ALOX5	RAB7L1		SERPINA9	ARID3A	C1ORF186	SYTL4
		ALOX5	ANAPC15	ANAPC15	SSBP2		SH3BP5	ARID3B	C5ORF30	TNFRSF13B
		ANAPC15	ARHGAP19	ARHGEF18			TBC1D27	ASB13	CD1A
		ARHGAP19	ARHGEF18	AUTS2			ABLIM1	ATP6V1E2	CD44
		ARHGEF18	ARPC1B	BACH2			ADPGK	AUTS2	CREB3L2
		ARPC1B	ATP6V0E1	BATF			ADTRP	BATF	CYB5R2
		ATP6V0E1	ATXN1	BATF3			AGFG1	BCL2L10	CYP39A1
		ATXN1	AUTS2	BMP7			ARHGEF3	BICD1	DOCK10
		AUTS2	BACH2	CCR7			ARID3A	BPNT1	FAM108C1
		BACH2	BATF	CD44			ARID3B	BSPRY	FAM46C
		BATF	BATF3	CD83			ASB13	C12ORF77	HDAC1
		BATF3	BCL2A1	CDC6			ATP6V1E2	C1ORF186	KCNH8
		BCL2A1	BMP7	CFLAR			AUTS2	C4ORF22	LIMD1
		BMP7	BUB1B	CLIP2			BATF	C5ORF30	LINC00487
		BUB1B	BYSL	CYB5R2			BCL2	C7ORF10	LOC100132147
		BYSL	CACYBP	DLEU1			BCL2L10	CD1A	LOC645431
		CACYBP	CASP8	DOCK10			BICD1	CD44	MAPK10
		CASP8	CBX2	GNA13			BPGM	CDHR3	MARC2
		CBX2	CCL17	GNL3			BPNT1	CREB3L2	MARCKSL1
		CCL17	CCNB2	HIP1R			BSPRY	CYB5R2	PALD1
		CCNB2	CCND1	ICOSLG			BTBD19	CYP39A1	PDE9A
		CCND1	CCR7	KIAA0226L			BTLA	DCTD	PHF16
		CCR7	CD320	LIMD1			C12ORF77	DNAJC10	PIM2
		CD320	CD40	LY75			C16ORF5	DOCK10	PPP1R1C
		CD40	CD44	MSH6			C1ORF186	EEPD1	SPINK2
		CD44	CD58	PIM2			C3ORF37	FAM108C1	SSBP2
		CD58	CD83	RAB7L1			C3ORF67	FAM134B	STAG3
		CD83	CDC25B	RASGRF1			C4ORF22	FAM171A1	SYTL4
		CDC25B	CDC6	SLA			C5ORF30	FAM208B	TCF19
		CDC6	CDC7	SLAMF1			C7ORF10	FAM46C	TNFRSF13B
		CDC7	CDK13	SSBP2			CCDC144B	FCRL5	TTC9
		CDK13	CDK4	VOPP1			CCDC50	GFOD1	ZBTB32
		CDK4	CDKN2C				CCDC64	HDAC1
		CDKN2C	CFLAR				CD1A	HEMGN
		CFLAR	CKS1B				CD44	HS2ST1
		CKS1B	CLIP2				CDHR3	HSP90B1
		CLIP2	CSTF3				CHST2	KCNH8
		CSTF3	CTSH				CPNE3	KCNJ1
		CTSH	CXCR3				CREB3L2	KCNK12
		CXCR3	CYB5R2				CYB5R2	KIAA1217
		CYB5R2	DEPDC1				CYP39A1	KLHL5
		DEPDC1	DHFR				DCTD	LANCL1
		DHFR	DLEU1				DIP2C	LIMD1
		DLEU1	DOCK10				DNAJC10	LINC00487
		DOCK10	DPY19L2P2				DOCK10	LOC100132147
		DPY19L2P2	DUT				EEPD1	LOC100506457
		DUT	EBI3				EHHADH	LOC645431
		EBI3	FAS				ELF1	LYPD6B
		FAS	FNBP1				ELL2	MAPK10
		FNBP1	FUBP1				ERP29	MARC2
		FUBP1	GGT1				FA2H	MARCKSL1
		GGT1	GJC1				FAM108C1	MIR155HG
		GJC1	GLO1				FAM134B	MPEG1
		GLO1	GNA13				FAM171A1	NFKBIZ
		GLRX5	GNL3				FAM208B	PALD1
		GMNN	HCK				FAM46C	PDE9A
		GNA13	HDAC2				FAM53B	PHF16
		GNL3	HIP1R				FAM78B	PIM2
		GRSF1	ICOSLG				FBLN5	PPP1R1C
		HCK	IL10RA				FBXL7	RAB7L1
		HDAC2	ITGB2				FBXO11	S1PR2
		HDGF	JAK2				FCRL5	SACS
		HIP1R	KIAA0226L				FGD6	SLC1A1
		HLA-E	LCP2				FNBP1L	SLC25A27
		HLA-F	LIMD1				FSD1L	SLC38A5
		HLA-G	LTBP1				FYTTD1	SPINK2
		HMGB1	LY75				GAB1	SSBP2
		HNRNPAB	MIF				GDPD5	SSBP3
		HNRNPU	MSH6				GFOD1	STAG3
		ICAM1	NOLC1				GNL3	STAMBPL1
		ICOSLG	NT5DC2				GPR183	SYTL4
		ID3	PIM2				HDAC1	TCF19
		IL10RA	PTTG1				HEMGN	TCF4
		IL18	RAB7L1				HIP1R	TCTN3
		IL2RG	RASGRF1				HOOK1	TNFRSF13B
		IL6R	RBFOX2				HS2ST1	TOB2
		ITGB2	RFC4				HSP90B1	TRAM2
		ITPR3	SGK1				ICOSLG	TTC9
		JAK2	SLA				IER2	VOPP1
		JAK3	SLAMF1				IGSF3	ZBTB32
		KIAA0226L	SSBP2				IL12A	ZFAND4
		KIAA0913	VOPP1				IL17RB	ZNF608
		KYNU					ILDR1
		LCP2					IQCD
		LIMD1					IRS1
		LRPPRC					IVNS1ABP
		LTBP1					KCNA3
		LY75					KCNH8
		MAP3K4					KCNJ1
		MAP3K8					KCNK12
		MAPKAPK5					KIAA0226L
		MATR3					KIAA0355
		MAZ					KIAA1217
		MDFIC					KIAA1549L
		MIF					KIF13B
		MIR600HG					KLF12
		MRPS2					KLHL21
		MSH6					KLHL5
		MYC					LANCL1
		NECAP2					LHFPL2
		NOLC1					LIMD1
		NOP56					LINC00487
		NREP					LOC100132147
		NT5DC2					LOC100287482
		NUDT21					LOC100506457
		NUDT6					LOC286149
		NUP205					LOC338758
		OXCT1					LOC645431
		PIM2					LPIN2
		PNN					LYAR
		POLE3					LYPD6B
		PPP1R14B					MAPK10
		PRR11					MARC2
		PTGIR					MARCKSL1
		PTTG1					MEF2C
		RAB7L1					MINA
		RALBP1					MIR155HG
		RANBP1					MMP20
		RASGRF1					MOCOS
		RBFOX2					MPEG1
		RFC3					NFKBIZ
		RFC4					NR3C1
		RGCC					PALD1
		RIN2					PARP15
		SAMSN1					PDE9A
		SBNO2					PDK3
		SEMA7A					PHF16
		SFPQ					PIM2
		SGK1					PLBD1
		SLA					PPP1R1C
		SLAMF1					PTK2
		SLC35E3					RAB7L1
		SMARCA4					REL
		SNRPA1					RRAS2
		SNX11					S1PR2
		SRPK1					SACS
		SSBP2					SLAMF1
		ST3GAL5					SLC12A8
		STAT3					SLC1A1
		TAPT1					SLC25A27
		TCF3					SLC38A5
		TCL1A					SMC6
		TERT					SOX9
		TLR1					SPAG16
		TLR2					SPINK2
		TMBIM6					SSBP2
		TMEM48					SSBP3
		TMEM97					STAG3
		TNFAIP3					STAMBPL1
		TNFRSF1B					STS
		TNFSF10					SUB1
		TOP1					SYTL4
		TP63					TCF19
		TPP1					TCF4
		TRAF1					TCTN3
		TRIP13					TNFRSF13B
		TTK					TOB2
		TTLL12					TRAM2
		UBE2S					TTC9
		UCK2					ULK2
		VOPP1					VOPP1
		VPREB3					ZBTB32
		VRK1					ZFAND4
		WDR19					ZNF318
		WHSC1					ZNF385C
		YTHDF1					ZNF608
		ZWILCH					ZPBP2
