# Supplementary material for: A Microarray Platform-Independent Classification Tool for Cell of Origin Class Allows Comparative Analysis of Gene Expression in Diffuse Large B-cell Lymphoma
Source: PLoS One. 2013 Feb 12;8(2):e55895. doi: 10.1371/journal.pone.0055895 (PMC3570548; doi:10.1371/journal.pone.0055895)
Supplement: Table S5 — Detailed class assignments for all data sets. This file includes tables for all data sets used in this manuscript. It provides the available details for each sample (as indicated) such as GEO_Number, Original order, GEO_Class, Age, Sex and meta-data, followed by the classes assigned for each sample for every classifier tested including the selected class, the confidence of selected class, and the scores assigned for other classes. For data sets used in classifier training and development the results for all tested classifiers, and all combinations of classifier genes and training data sets are provided. For data sets used in later stages only classes assigned by DAC (LMT_J48_RF100_SMO) trained on Wright et al. data are shown. (XLSX) [file pone.0055895.s006.xlsx]

## Sheet: GSE10846_CHOP
									WRIGHT TRAINED
									Wright Trained, Classifier Selection
OriginalOrder	Sample	GEO_Class	Sex	Age	Follow-up	Follow-up Status	ClassLMT_J48_RF100_SMO	MaxConf	ClassBayesNet	TypeIII	ABC	GCB	ClassBFTree	TypeIII	ABC	GCB	ClassFT	TypeIII	ABC	GCB	ClassJ48	TypeIII	ABC	GCB	ClassLMT	TypeIII	ABC	GCB	ClassNBTree	TypeIII	ABC	GCB	ClassRandomTree	TypeIII	ABC	GCB	ClassREPTree	TypeIII	ABC	GCB	ClassRF100	TypeIII	ABC	GCB	ClassRF200	TypeIII	ABC	GCB	ClassSimpleCart
150	GSM274972	ABC	female	84	0.2	1	ABC	0.905	ABC	0	1	0	ABC	0.058	0.923	0.019	ABC	0	1	0	ABC	0.016	0.984	0	ABC	0.003	0.997	0	ABC	0	0.982	0.017	ABC	0	1	0	ABC	0.086	0.803	0.112	ABC	0.03	0.97	0	ABC	0.02	0.98	0	ABC
120	GSM275011	ABC	male	73	1.31	1	ABC	0.903	ABC	0	1	0	ABC	0.058	0.923	0.019	ABC	0	1	0	ABC	0.016	0.984	0	ABC	0	1	0	ABC	0.033	0.944	0.022	ABC	0	1	0	ABC	0.086	0.803	0.112	ABC	0.01	0.96	0.03	ABC	0.005	0.945	0.05	ABC
177	GSM274919	ABC	female	57	0.25	1	ABC	0.901	ABC	0	1	0	ABC	0.058	0.923	0.019	ABC	0	1	0	ABC	0.016	0.984	0	ABC	0.015	0.984	0.001	ABC	0.001	0.994	0.006	ABC	0	1	0	ABC	0.086	0.803	0.112	ABC	0.019	0.97	0.011	ABC	0.027	0.967	0.005	ABC
125	GSM274960	ABC	male	68	7.72	0	ABC	0.891	ABC	0	1	0	ABC	0.058	0.923	0.019	ABC	0	1	0	ABC	0.016	0.984	0	ABC	0.006	0.981	0.012	ABC	0.033	0.944	0.022	ABC	0	1	0	ABC	0.086	0.803	0.112	ABC	0.02	0.93	0.05	ABC	0.015	0.935	0.05	ABC
180	GSM274981	ABC	female	26	10.53	0	ABC	0.884	ABC	0	1	0	ABC	0	0.968	0.032	ABC	0.019	0.981	0	ABC	0.016	0.984	0	ABC	0.009	0.981	0.009	ABC	0.024	0.892	0.084	ABC	0	1	0	ABC	0.086	0.803	0.112	ABC	0.04	0.903	0.057	ABC	0.045	0.885	0.071	ABC
132	GSM274914	ABC	male	56	5	0	ABC	0.882	ABC	0	1	0	ABC	0.058	0.923	0.019	ABC	0	1	0	ABC	0.016	0.984	0	ABC	0.024	0.975	0.001	ABC	0.033	0.944	0.022	ABC	0	1	0	ABC	0.086	0.803	0.112	ABC	0.07	0.9	0.03	ABC	0.07	0.91	0.02	ABC
119	GSM275022	ABC	male	74	1.04	1	ABC	0.88	ABC	0	1	0	ABC	0.058	0.923	0.019	ABC	0.002	0.998	0	ABC	0.016	0.984	0	ABC	0.063	0.936	0.001	ABC	0.001	0.994	0.006	ABC	0	1	0	ABC	0.086	0.803	0.112	ABC	0.06	0.932	0.008	ABC	0.059	0.933	0.008	ABC
118	GSM275014	ABC	male	74	2.59	1	ABC	0.871	ABC	0	1	0	ABC	0.058	0.923	0.019	ABC	0	1	0	ABC	0.016	0.984	0	ABC	0.015	0.985	0	ABC	0.062	0.844	0.094	ABC	0	1	0	ABC	0.086	0.803	0.112	ABC	0.12	0.848	0.033	ABC	0.108	0.856	0.036	ABC
173	GSM274933	ABC	female	63	2.31	1	ABC	0.865	ABC	0	1	0	ABC	0.058	0.923	0.019	ABC	0	1	0	ABC	0.016	0.984	0	ABC	0.145	0.851	0.004	ABC	0.001	0.994	0.006	ABC	0	1	0	ABC	0.086	0.803	0.112	ABC	0.04	0.958	0.002	ABC	0.045	0.953	0.002	ABC
122	GSM274957	ABC	male	71	2.82	1	ABC	0.865	ABC	0	1	0	ABC	0.058	0.923	0.019	ABC	0	1	0	ABC	0.016	0.984	0	ABC	0.142	0.856	0.002	ABC	0.122	0.693	0.185	ABC	0	1	0	ABC	0.086	0.803	0.112	ABC	0.047	0.953	0	ABC	0.052	0.935	0.014	ABC
117	GSM275001	ABC	male	74	0.31	1	ABC	0.863	ABC	0	1	0	ABC	0	0.968	0.032	TypeIII	0.919	0.081	0	ABC	0.016	0.984	0	ABC	0.031	0.963	0.006	ABC	0.024	0.892	0.084	ABC	0	1	0	ABC	0.086	0.803	0.112	ABC	0.103	0.837	0.06	ABC	0.119	0.831	0.05	ABC
128	GSM274974	ABC	male	66	0.29	1	ABC	0.862	ABC	0	1	0	ABC	0	0.968	0.032	ABC	0.006	0.994	0	ABC	0.016	0.984	0	ABC	0.001	0.995	0.004	ABC	0.024	0.892	0.084	ABC	0	1	0	ABC	0.086	0.803	0.112	ABC	0.09	0.804	0.106	ABC	0.05	0.857	0.093	ABC
157	GSM274897	ABC	female	76	2.54	1	ABC	0.857	ABC	0	1	0	ABC	0.058	0.923	0.019	ABC	0	1	0	ABC	0.016	0.984	0	ABC	0.093	0.906	0.001	ABC	0.041	0.959	0	ABC	0	1	0	ABC	0.086	0.803	0.112	ABC	0.127	0.873	0	ABC	0.104	0.891	0.005	ABC
165	GSM274975	ABC	female	69	7.49	1	ABC	0.857	ABC	0	1	0	ABC	0.058	0.923	0.019	ABC	0	1	0	ABC	0.016	0.984	0	ABC	0.208	0.788	0.004	ABC	0.001	0.994	0.006	ABC	0	1	0	ABC	0.086	0.803	0.112	ABC	0.01	0.99	0	ABC	0.01	0.99	0	ABC
115	GSM275032	ABC	male	78	0.42	1	ABC	0.852	ABC	0.008	0.992	0	ABC	0.058	0.923	0.019	TypeIII	0.937	0.063	0	ABC	0.016	0.984	0	ABC	0.096	0.888	0.017	ABC	0.109	0.89	0.001	ABC	0	1	0	ABC	0.086	0.803	0.112	ABC	0.072	0.868	0.06	ABC	0.113	0.838	0.049	ABC
172	GSM274921	ABC	female	63	2.31	1	ABC	0.847	ABC	0	1	0	ABC	0.058	0.923	0.019	ABC	0	1	0	ABC	0.016	0.984	0	ABC	0.054	0.938	0.008	ABC	0.033	0.887	0.08	ABC	0	1	0	TypeIII	0.875	0.125	0	ABC	0.184	0.798	0.018	ABC	0.157	0.828	0.015	ABC
159	GSM274926	ABC	female	75	0.34	1	ABC	0.836	ABC	0.04	0.96	0	ABC	0.058	0.923	0.019	ABC	0.032	0.968	0	ABC	0.016	0.984	0	ABC	0.119	0.866	0.015	ABC	0.002	0.998	0	TypeIII	1	0	0	ABC	0.086	0.803	0.112	ABC	0.162	0.828	0.01	ABC	0.154	0.83	0.016	ABC
141	GSM275025	ABC	male	45	0.6	1	ABC	0.834	ABC	0.005	0.995	0	ABC	0.058	0.923	0.019	ABC	0	1	0	ABC	0.016	0.984	0	ABC	0.025	0.973	0.002	ABC	0.016	0.944	0.04	ABC	0	1	0	ABC	0.086	0.803	0.112	ABC	0.207	0.711	0.082	ABC	0.184	0.738	0.078	ABC
151	GSM275017	ABC	female	81	7.81	0	ABC	0.829	ABC	0	1	0	ABC	0.058	0.923	0.019	ABC	0	1	0	ABC	0	0.838	0.162	ABC	0.063	0.884	0.053	ABC	0.024	0.892	0.084	ABC	0	1	0	ABC	0.086	0.803	0.112	ABC	0.01	0.927	0.063	ABC	0.02	0.939	0.042	ABC
123	GSM275010	ABC	male	70	0.69	1	ABC	0.825	ABC	0.007	0.993	0	ABC	0.058	0.923	0.019	ABC	0	1	0	ABC	0.016	0.984	0	ABC	0.055	0.839	0.106	ABC	0.024	0.892	0.084	GCB	0	0	1	ABC	0.086	0.803	0.112	ABC	0.115	0.809	0.075	ABC	0.12	0.777	0.103	ABC
147	GSM274900	ABC	male	36	7.21	0	ABC	0.824	ABC	0	1	0	GCB	0.034	0.04	0.927	ABC	0	1	0	ABC	0	0.838	0.162	ABC	0.024	0.969	0.007	ABC	0.033	0.944	0.022	ABC	0	1	0	ABC	0.086	0.803	0.112	ABC	0.08	0.823	0.097	ABC	0.091	0.832	0.077	GCB
112	GSM275027	ABC	male	83	0.16	1	ABC	0.821	ABC	0	1	0	GCB	0	0	1	ABC	0	1	0	ABC	0.225	0.775	0	ABC	0.055	0.942	0.002	ABC	0.269	0.691	0.04	ABC	0	1	0	ABC	0.086	0.803	0.112	ABC	0.068	0.9	0.032	ABC	0.07	0.909	0.021	GCB
178	GSM274898	ABC	female	56	9.67	0	ABC	0.815	ABC	0	1	0	ABC	0	0.968	0.032	TypeIII	0.877	0.123	0	ABC	0.225	0.775	0	ABC	0.071	0.927	0.002	ABC	0.002	0.998	0	ABC	0	1	0	ABC	0.086	0.803	0.112	ABC	0.05	0.89	0.06	ABC	0.051	0.887	0.062	ABC
121	GSM274995	ABC	male	72	0.21	1	ABC	0.808	ABC	0.005	0.995	0	ABC	0.058	0.923	0.019	ABC	0	1	0	ABC	0.016	0.984	0	ABC	0.221	0.773	0.005	GCB	0.319	0.164	0.517	ABC	0	1	0	ABC	0.086	0.803	0.112	ABC	0.162	0.809	0.029	ABC	0.19	0.79	0.02	ABC
175	GSM274948	ABC	female	59	0.31	1	ABC	0.804	ABC	0.011	0.989	0	ABC	0	1	0	ABC	0	1	0	ABC	0.225	0.775	0	ABC	0.052	0.943	0.004	GCB	0.386	0.187	0.427	ABC	0	1	0	ABC	0.086	0.803	0.112	ABC	0.123	0.833	0.043	ABC	0.167	0.786	0.046	ABC
130	GSM274902	ABC	male	62	10.14	0	ABC	0.799	ABC	0	1	0	ABC	0.058	0.923	0.019	ABC	0.015	0.985	0	ABC	0	0.838	0.162	ABC	0.069	0.843	0.088	ABC	0.033	0.944	0.022	ABC	0	1	0	ABC	0.086	0.803	0.112	ABC	0.06	0.849	0.091	ABC	0.08	0.81	0.11	ABC
139	GSM275039	ABC	male	46	1.86	1	ABC	0.797	ABC	0	1	0	ABC	0	1	0	ABC	0	1	0	ABC	0.225	0.775	0	ABC	0.019	0.963	0.018	GCB	0.073	0.315	0.612	ABC	0	1	0	ABC	0.086	0.803	0.112	ABC	0.045	0.786	0.169	ABC	0.083	0.766	0.151	GCB
114	GSM274988	ABC	male	80	0.04	1	ABC	0.795	ABC	0	1	0	ABC	0	1	0	ABC	0	1	0	ABC	0.225	0.775	0	ABC	0.004	0.994	0.002	GCB	0.073	0.315	0.612	ABC	0	1	0	ABC	0.086	0.803	0.112	ABC	0.065	0.745	0.19	ABC	0.07	0.745	0.185	GCB
136	GSM275045	ABC	male	50	8.45	0	ABC	0.789	ABC	0	1	0	ABC	0	1	0	ABC	0	1	0	ABC	0.225	0.775	0	ABC	0.074	0.921	0.005	GCB	0.017	0.001	0.982	ABC	0	1	0	ABC	0.086	0.803	0.112	ABC	0.12	0.792	0.087	ABC	0.154	0.755	0.091	ABC
138	GSM274899	ABC	male	46	4.83	0	ABC	0.783	ABC	0.003	0.766	0.231	ABC	0	0.968	0.032	ABC	0	1	0	ABC	0.225	0.775	0	ABC	0.015	0.864	0.122	GCB	0.386	0.187	0.427	ABC	0	1	0	ABC	0.086	0.803	0.112	ABC	0.067	0.828	0.105	ABC	0.105	0.766	0.129	ABC
162	GSM275002	ABC	female	72	0.01	1	ABC	0.78	ABC	0	1	0	ABC	0.058	0.923	0.019	ABC	0.008	0.992	0	ABC	0	0.848	0.152	ABC	0.276	0.71	0.013	ABC	0.001	0.994	0.006	ABC	0	1	0	ABC	0.086	0.803	0.112	ABC	0.074	0.896	0.03	ABC	0.077	0.908	0.015	ABC
174	GSM274945	ABC	female	62	0.94	1	ABC	0.777	ABC	0.006	0.994	0	ABC	0	1	0	ABC	0	1	0	ABC	0.225	0.775	0	ABC	0.156	0.836	0.008	GCB	0.386	0.187	0.427	ABC	0	1	0	ABC	0.086	0.803	0.112	ABC	0.16	0.83	0.01	ABC	0.141	0.842	0.017	ABC
135	GSM274996	ABC	male	51	0.35	1	ABC	0.747	ABC	0	1	0	ABC	0	1	0	ABC	0	1	0	ABC	0.225	0.775	0	ABC	0.126	0.874	0	ABC	0.273	0.396	0.332	ABC	0	1	0	ABC	0.086	0.803	0.112	ABC	0.281	0.674	0.046	ABC	0.298	0.674	0.028	ABC
111	GSM274924	ABC	NA	54	1.31	1	ABC	0.741	ABC	0.184	0.814	0.002	TypeIII	1	0	0	ABC	0	1	0	ABC	0.225	0.775	0	ABC	0.217	0.694	0.09	GCB	0.386	0.187	0.427	ABC	0	1	0	ABC	0.086	0.803	0.112	ABC	0.122	0.831	0.048	ABC	0.166	0.785	0.049	TypeIII
176	GSM274998	ABC	female	59	4.11	0	ABC	0.73	ABC	0.001	0.999	0	GCB	0.034	0.04	0.927	TypeIII	0.688	0.312	0	ABC	0	0.838	0.162	ABC	0.097	0.737	0.167	ABC	0.024	0.892	0.084	ABC	0	1	0	ABC	0.086	0.803	0.112	ABC	0.058	0.677	0.266	ABC	0.044	0.702	0.255	ABC
124	GSM275031	ABC	male	69	3.26	1	ABC	0.728	ABC	0	1	0	ABC	0.058	0.923	0.019	ABC	0.002	0.998	0	ABC	0.096	0.904	0	ABC	0.437	0.549	0.013	ABC	0.001	0.994	0.006	ABC	0	1	0	ABC	0.086	0.803	0.112	ABC	0.157	0.791	0.052	ABC	0.117	0.84	0.043	ABC
144	GSM274999	ABC	male	41	6.08	1	ABC	0.726	ABC	0	1	0	GCB	0.034	0.04	0.927	ABC	0.056	0.944	0	ABC	0.096	0.904	0	ABC	0.005	0.775	0.22	GCB	0.041	0.013	0.947	ABC	0	1	0	GCB	0.084	0.177	0.739	ABC	0	0.559	0.441	ABC	0.017	0.52	0.463	GCB
170	GSM275028	ABC	female	64	1	1	ABC	0.718	ABC	0	0.998	0.002	ABC	0	0.968	0.032	ABC	0.06	0.94	0	ABC	0.096	0.904	0	ABC	0.051	0.691	0.258	ABC	0.269	0.691	0.04	ABC	0	1	0	GCB	0.084	0.177	0.739	ABC	0.065	0.61	0.325	ABC	0.05	0.672	0.278	ABC
113	GSM274970	ABC	male	80	2.49	1	ABC	0.711	ABC	0.001	0.999	0	ABC	0.058	0.923	0.019	TypeIII	0.987	0.013	0	ABC	0.016	0.984	0	ABC	0.442	0.557	0.001	ABC	0.033	0.944	0.022	ABC	0	1	0	ABC	0.086	0.803	0.112	ABC	0.353	0.635	0.012	ABC	0.311	0.683	0.006	ABC
168	GSM275035	ABC	female	66	0.96	1	ABC	0.709	ABC	0	1	0	ABC	0.058	0.923	0.019	ABC	0	1	0	ABC	0	0.848	0.152	ABC	0.416	0.578	0.006	ABC	0.033	0.944	0.022	TypeIII	1	0	0	TypeIII	0.875	0.125	0	ABC	0.225	0.745	0.03	ABC	0.227	0.745	0.028	ABC
108	GSM274915	ABC	NA	80	0.28	1	ABC	0.683	ABC	0.018	0.982	0	ABC	0.058	0.923	0.019	TypeIII	0.882	0.118	0	ABC	0.096	0.904	0	ABC	0.361	0.61	0.029	TypeIII	0.4	0.356	0.244	ABC	0	1	0	TypeIII	0.875	0.125	0	ABC	0.364	0.55	0.086	ABC	0.357	0.57	0.073	ABC
129	GSM274954	ABC	male	64	0.38	1	ABC	0.678	ABC	0.001	0.999	0	ABC	0	1	0	TypeIII	0.982	0.017	0	ABC	0.225	0.775	0	ABC	0.336	0.657	0.007	TypeIII	0.53	0.256	0.215	ABC	0	1	0	ABC	0.086	0.803	0.112	ABC	0.338	0.614	0.048	ABC	0.362	0.572	0.066	ABC
161	GSM274964	ABC	female	72	0.99	1	ABC	0.656	ABC	0.48	0.52	0	ABC	0.058	0.923	0.019	TypeIII	0.997	0.001	0.002	ABC	0.016	0.984	0	TypeIII	0.499	0.468	0.033	ABC	0.033	0.944	0.022	ABC	0	1	0	GCB	0.201	0.074	0.726	ABC	0.402	0.504	0.094	ABC	0.349	0.599	0.052	ABC
88	GSM275050	TypeIII	male	61	9.16	0	ABC	0.649	ABC	0.351	0.648	0.001	ABC	0.058	0.923	0.019	ABC	0.122	0.878	0	ABC	0.016	0.984	0	ABC	0.444	0.539	0.016	ABC	0.152	0.848	0	ABC	0	1	0	GCB	0.043	0.016	0.941	TypeIII	0.421	0.405	0.174	ABC	0.386	0.425	0.189	ABC
131	GSM274934	ABC	male	60	2.26	1	ABC	0.645	ABC	0.019	0.981	0	ABC	0.058	0.923	0.019	TypeIII	0.958	0.029	0.013	ABC	0.016	0.984	0	TypeIII	0.639	0.331	0.03	ABC	0.057	0.943	0	ABC	0	1	0	TypeIII	0.875	0.125	0	ABC	0.38	0.597	0.023	ABC	0.321	0.649	0.03	ABC
143	GSM274923	ABC	male	41	0.71	1	ABC	0.629	ABC	0.227	0.772	0	ABC	0.058	0.923	0.019	TypeIII	0.502	0.274	0.224	ABC	0.016	0.984	0	TypeIII	0.402	0.367	0.231	TypeIII	0.494	0.473	0.034	ABC	0	1	0	ABC	0.086	0.803	0.112	ABC	0.432	0.497	0.07	ABC	0.385	0.543	0.072	ABC
91	GSM275056	TypeIII	male	58	0.62	1	ABC	0.626	ABC	0	0.685	0.314	ABC	0	0.968	0.032	ABC	0	1	0	ABC	0.096	0.904	0	GCB	0.003	0.476	0.522	GCB	0.041	0.013	0.947	GCB	0	0	1	ABC	0.086	0.803	0.112	GCB	0.01	0.458	0.532	GCB	0.012	0.451	0.537	ABC
134	GSM274983	ABC	male	54	1.03	1	ABC	0.623	ABC	0.013	0.987	0	TypeIII	0.973	0	0.027	TypeIII	0.919	0.034	0.047	ABC	0.096	0.904	0	ABC	0.203	0.415	0.381	GCB	0.242	0.022	0.736	GCB	0	0	1	ABC	0.086	0.803	0.112	ABC	0.254	0.504	0.242	ABC	0.207	0.584	0.209	TypeIII
152	GSM275036	ABC	female	81	7.62	0	ABC	0.622	ABC	0	1	0	ABC	0	1	0	ABC	0.003	0.997	0	TypeIII	0.667	0	0.333	ABC	0.066	0.933	0.001	GCB	0.386	0.187	0.427	ABC	0	1	0	ABC	0.086	0.803	0.112	ABC	0.102	0.889	0.009	ABC	0.12	0.873	0.007	ABC
160	GSM274950	ABC	female	75	0.51	1	ABC	0.613	ABC	0.027	0.962	0.011	GCB	0	0	1	TypeIII	0.919	0.003	0.078	ABC	0	0.848	0.152	ABC	0.152	0.567	0.281	GCB	0.386	0.187	0.427	TypeIII	1	0	0	GCB	0.043	0.016	0.941	ABC	0.329	0.37	0.301	ABC	0.297	0.402	0.301	GCB
127	GSM275021	ABC	male	67	2	1	ABC	0.602	ABC	0.36	0.64	0	TypeIII	0.973	0	0.027	TypeIII	0.549	0.411	0.04	ABC	0.016	0.984	0	TypeIII	0.67	0.308	0.022	TypeIII	0.494	0.473	0.034	TypeIII	1	0	0	ABC	0.086	0.803	0.112	TypeIII	0.492	0.45	0.058	ABC	0.46	0.469	0.071	TypeIII
158	GSM275013	ABC	female	76	0.34	1	ABC	0.597	TypeIII	0.94	0.06	0	ABC	0.058	0.923	0.019	TypeIII	0.997	0.003	0	ABC	0.016	0.984	0	TypeIII	0.6	0.397	0.004	TypeIII	0.977	0.022	0.001	TypeIII	1	0	0	ABC	0.086	0.803	0.112	ABC	0.276	0.675	0.049	ABC	0.285	0.662	0.053	ABC
153	GSM275037	ABC	female	81	6.8	1	ABC	0.592	ABC	0.115	0.885	0	TypeIII	0.973	0	0.027	ABC	0.421	0.569	0.01	ABC	0.016	0.984	0	TypeIII	0.568	0.414	0.018	ABC	0.041	0.959	0	ABC	0	1	0	ABC	0.086	0.803	0.112	ABC	0.307	0.636	0.057	ABC	0.355	0.59	0.055	TypeIII
110	GSM274938	ABC	NA	72	0.82	0	ABC	0.567	ABC	0.013	0.987	0	GCB	0	0	1	ABC	0	1	0	GCB	0.009	0.013	0.978	ABC	0.066	0.921	0.013	GCB	0.386	0.187	0.427	TypeIII	1	0	0	GCB	0.201	0.074	0.726	ABC	0.169	0.667	0.163	ABC	0.166	0.693	0.141	GCB
146	GSM274941	ABC	male	39	0.62	1	ABC	0.565	TypeIII	0.819	0.175	0.006	TypeIII	0.973	0	0.027	ABC	0.084	0.911	0.004	ABC	0.225	0.775	0	ABC	0.411	0.472	0.117	ABC	0.004	0.995	0	TypeIII	1	0	0	ABC	0.086	0.803	0.112	TypeIII	0.517	0.345	0.138	TypeIII	0.495	0.353	0.152	TypeIII
142	GSM274942	ABC	male	42	6.44	0	ABC	0.552	ABC	0.011	0.989	0	ABC	0	1	0	ABC	0.003	0.997	0	TypeIII	0.805	0.065	0.13	ABC	0.176	0.816	0.007	ABC	0.033	0.887	0.08	TypeIII	1	0	0	ABC	0.086	0.803	0.112	ABC	0.34	0.66	0	ABC	0.316	0.668	0.016	ABC
163	GSM275015	ABC	female	72	2.45	1	ABC	0.545	ABC	0.117	0.882	0	ABC	0	0.968	0.032	ABC	0.33	0.664	0.006	TypeIII	1	0	0	ABC	0.195	0.784	0.021	ABC	0.024	0.892	0.084	GCB	0	0	1	ABC	0.086	0.803	0.112	ABC	0.16	0.73	0.11	ABC	0.2	0.71	0.09	ABC
116	GSM274920	ABC	male	77	6.64	1	ABC	0.526	TypeIII	0.775	0.163	0.061	ABC	0.058	0.923	0.019	TypeIII	0.962	0.029	0.009	GCB	0	0.111	0.889	ABC	0.194	0.722	0.085	TypeIII	0.783	0.163	0.054	ABC	0	1	0	ABC	0.086	0.803	0.112	ABC	0.132	0.604	0.263	ABC	0.193	0.581	0.226	ABC
78	GSM275059	TypeIII	NA	66	7.42	0	ABC	0.525	ABC	0	0.634	0.366	GCB	0	0.039	0.961	ABC	0	1	0	ABC	0.016	0.984	0	GCB	0.037	0.22	0.744	GCB	0.253	0.207	0.54	GCB	0	0	1	ABC	0.086	0.803	0.112	ABC	0.096	0.564	0.339	ABC	0.119	0.535	0.346	GCB
169	GSM274917	ABC	female	65	5.57	1	ABC	0.509	TypeIII	0.883	0.117	0.001	ABC	0.058	0.923	0.019	ABC	0	1	0	GCB	0.009	0.013	0.978	ABC	0.122	0.871	0.007	TypeIII	0.903	0.056	0.042	ABC	0	1	0	ABC	0.086	0.803	0.112	ABC	0.404	0.486	0.11	ABC	0.383	0.506	0.11	ABC
167	GSM275003	ABC	female	66	0.33	1	ABC	0.499	ABC	0.002	0.678	0.321	GCB	0.034	0.04	0.927	GCB	0.005	0.208	0.787	GCB	0.009	0.013	0.978	ABC	0.022	0.841	0.137	GCB	0.084	0.282	0.634	ABC	0	1	0	ABC	0.086	0.803	0.112	GCB	0.037	0.473	0.49	GCB	0.023	0.423	0.554	GCB
140	GSM274979	ABC	male	45	2.02	0	ABC	0.473	TypeIII	0.994	0.006	0	ABC	0	1	0	TypeIII	0.999	0.001	0	TypeIII	0.667	0	0.333	ABC	0.195	0.781	0.024	TypeIII	0.53	0.256	0.215	TypeIII	1	0	0	GCB	0.201	0.074	0.726	TypeIII	0.462	0.446	0.093	ABC	0.433	0.483	0.084	ABC
171	GSM275029	ABC	female	64	0.47	1	ABC	0.469	GCB	0.085	0.02	0.895	GCB	0.034	0.04	0.927	TypeIII	0.495	0.245	0.26	ABC	0	0.838	0.162	GCB	0.084	0.142	0.774	GCB	0.068	0.012	0.92	GCB	0	0	1	GCB	0.201	0.074	0.726	GCB	0.172	0.231	0.597	GCB	0.165	0.231	0.604	TypeIII
102	GSM275063	TypeIII	female	65	0.37	1	ABC	0.443	TypeIII	0.968	0.002	0.03	GCB	0	0	1	GCB	0.303	0.036	0.661	ABC	0	0.848	0.152	GCB	0.086	0.344	0.57	GCB	0.242	0.022	0.736	TypeIII	1	0	0	GCB	0.201	0.074	0.726	TypeIII	0.401	0.246	0.353	TypeIII	0.411	0.285	0.304	GCB
126	GSM274984	ABC	male	67	5.4	1	ABC	0.398	TypeIII	0.779	0.003	0.218	TypeIII	1	0	0	GCB	0.432	0.061	0.507	TypeIII	0.667	0	0.333	ABC	0.216	0.558	0.226	GCB	0.386	0.187	0.427	ABC	0	1	0	GCB	0.043	0.016	0.941	TypeIII	0.373	0.366	0.261	ABC	0.335	0.449	0.216	TypeIII
75	GSM274910	GCB	female	39	8.86	0	GCB	0.914	GCB	0	0	1	GCB	0.034	0.04	0.927	GCB	0	0	1	GCB	0	0	1	GCB	0.001	0.001	0.998	GCB	0.021	0.021	0.959	GCB	0	0	1	GCB	0.043	0.016	0.941	GCB	0.01	0	0.99	GCB	0.005	0	0.995	GCB
39	GSM274965	GCB	male	47	5.65	0	GCB	0.914	GCB	0	0	1	GCB	0.034	0.04	0.927	GCB	0	0	1	GCB	0	0	1	GCB	0.001	0.001	0.998	GCB	0.021	0.021	0.959	GCB	0	0	1	GCB	0.043	0.016	0.941	GCB	0	0.01	0.99	GCB	0	0.005	0.995	GCB
4	GSM274903	GCB	NA	70	1.33	1	GCB	0.911	GCB	0	0	1	GCB	0.034	0.04	0.927	GCB	0	0	1	GCB	0.009	0.013	0.978	GCB	0	0	0.999	GCB	0.041	0.013	0.947	GCB	0	0	1	GCB	0.043	0.016	0.941	GCB	0	0	1	GCB	0	0.005	0.995	GCB
69	GSM274909	GCB	female	56	14.24	0	GCB	0.91	GCB	0	0	1	GCB	0.034	0.04	0.927	GCB	0	0	1	GCB	0.009	0.013	0.978	GCB	0.001	0.002	0.997	GCB	0.006	0	0.994	GCB	0	0	1	GCB	0.043	0.016	0.941	GCB	0	0	1	GCB	0	0	1	GCB
42	GSM274977	GCB	male	44	21.78	0	GCB	0.91	GCB	0	0	1	GCB	0.019	0	0.981	GCB	0	0	1	GCB	0.009	0.013	0.978	GCB	0.003	0	0.997	GCB	0.001	0	0.999	GCB	0	0	1	GCB	0.043	0.016	0.941	GCB	0	0	1	GCB	0.009	0.01	0.981	GCB
27	GSM274916	GCB	male	62	14.59	0	GCB	0.909	GCB	0	0	1	GCB	0.034	0.04	0.927	GCB	0	0	1	GCB	0.009	0.013	0.978	GCB	0	0	1	GCB	0	0	1	GCB	0	0	1	GCB	0.084	0.177	0.739	GCB	0.007	0	0.993	GCB	0.004	0.007	0.989	GCB
54	GSM275040	GCB	female	75	2.76	1	GCB	0.909	GCB	0	0	1	GCB	0.034	0.04	0.927	GCB	0	0	1	GCB	0.009	0.013	0.978	GCB	0.001	0	0.999	GCB	0.021	0.021	0.959	GCB	0	0	1	GCB	0.084	0.177	0.739	GCB	0	0.009	0.991	GCB	0	0.005	0.995	GCB
22	GSM274937	GCB	male	67	6.46	0	GCB	0.908	GCB	0	0	1	GCB	0.034	0.04	0.927	GCB	0	0	1	GCB	0.009	0.013	0.978	GCB	0.002	0	0.998	GCB	0.021	0.021	0.959	GCB	0	0	1	GCB	0.043	0.016	0.941	GCB	0.01	0	0.99	GCB	0.005	0	0.995	GCB
47	GSM274982	GCB	female	88	3.88	0	GCB	0.908	GCB	0	0	1	GCB	0.034	0.04	0.927	GCB	0	0	1	GCB	0.009	0.013	0.978	GCB	0.011	0	0.989	GCB	0.021	0.021	0.959	GCB	0	0	1	GCB	0.043	0.016	0.941	GCB	0	0	1	GCB	0.004	0	0.996	GCB
76	GSM275008	GCB	female	34	1.45	1	GCB	0.907	GCB	0	0	1	GCB	0.034	0.04	0.927	GCB	0	0	1	GCB	0	0	1	GCB	0.001	0	0.998	GCB	0	0	1	GCB	0	0	1	GCB	0.084	0.177	0.739	GCB	0.01	0.028	0.962	GCB	0.005	0.014	0.981	GCB
33	GSM274918	GCB	male	55	6.94	1	GCB	0.906	GCB	0	0	1	GCB	0.034	0.04	0.927	GCB	0	0	1	GCB	0.009	0.013	0.978	GCB	0	0	1	GCB	0	0	1	GCB	0	0	1	GCB	0.043	0.016	0.941	GCB	0.01	0.01	0.98	GCB	0.005	0.013	0.982	GCB
56	GSM274947	GCB	female	72	3.03	1	GCB	0.906	GCB	0	0	1	GCB	0.034	0.04	0.927	GCB	0	0	1	GCB	0.009	0.013	0.978	GCB	0.002	0	0.998	GCB	0.003	0.023	0.974	GCB	0	0	1	GCB	0.084	0.177	0.739	GCB	0.01	0.01	0.98	GCB	0.024	0.005	0.971	GCB
43	GSM274930	GCB	male	42	11.17	0	GCB	0.905	GCB	0.001	0	0.999	GCB	0.034	0.04	0.927	GCB	0	0	1	GCB	0	0	1	GCB	0.002	0.003	0.995	GCB	0.002	0	0.998	GCB	0	0	1	GCB	0.084	0.177	0.739	GCB	0.04	0	0.96	GCB	0.033	0.027	0.94	GCB
32	GSM274986	GCB	male	56	10.18	0	GCB	0.904	GCB	0	0	1	GCB	0.034	0.04	0.927	GCB	0	0	1	GCB	0.009	0.013	0.978	GCB	0.026	0	0.973	GCB	0.021	0.021	0.959	GCB	0	0	1	GCB	0.043	0.016	0.941	GCB	0	0	1	GCB	0	0	1	GCB
1	GSM274940	GCB	NA	87	4.99	1	GCB	0.903	GCB	0	0	1	GCB	0.034	0.04	0.927	GCB	0	0	1	GCB	0.009	0.013	0.978	GCB	0.001	0	0.999	GCB	0.01	0	0.99	GCB	0	0	1	GCB	0.043	0.016	0.941	GCB	0.02	0.009	0.971	GCB	0.023	0.005	0.973	GCB
67	GSM275046	GCB	female	59	9.68	0	GCB	0.903	GCB	0	0	1	GCB	0.034	0.04	0.927	GCB	0	0	1	GCB	0.009	0.013	0.978	GCB	0.001	0	0.999	GCB	0	0	1	GCB	0	0	1	GCB	0.043	0.016	0.941	GCB	0.03	0	0.97	GCB	0.032	0	0.968	GCB
26	GSM274949	GCB	male	64	0.12	1	GCB	0.901	GCB	0	0	1	GCB	0.034	0.04	0.927	GCB	0	0	1	GCB	0.009	0.013	0.978	GCB	0.002	0.001	0.998	GCB	0	0	1	GCB	0	0	1	GCB	0.043	0.016	0.941	GCB	0.03	0.01	0.96	GCB	0.023	0.008	0.969	GCB
61	GSM275016	GCB	female	66	0.12	1	GCB	0.901	GCB	0	0	1	GCB	0.034	0.04	0.927	GCB	0	0	1	GCB	0.009	0.013	0.978	GCB	0	0	0.999	GCB	0	0	1	TypeIII	1	0	0	GCB	0.043	0.016	0.941	GCB	0.02	0.02	0.96	GCB	0.015	0.01	0.975	GCB
44	GSM274956	GCB	male	35	8.15	0	GCB	0.9	GCB	0	0	1	GCB	0.034	0.04	0.927	GCB	0	0	1	GCB	0.009	0.013	0.978	GCB	0.002	0.004	0.994	GCB	0.002	0	0.998	GCB	0	0	1	GCB	0.043	0.016	0.941	GCB	0.03	0.01	0.96	GCB	0.018	0.015	0.967	GCB
49	GSM274911	GCB	female	81	3.93	1	GCB	0.899	GCB	0	0	1	GCB	0.034	0.04	0.927	GCB	0	0	1	GCB	0.009	0.013	0.978	GCB	0.039	0.01	0.951	GCB	0.021	0.021	0.959	GCB	0	0	1	GCB	0.043	0.016	0.941	GCB	0	0	1	GCB	0.002	0	0.998	GCB
2	GSM274966	GCB	NA	81	2.43	0	GCB	0.897	GCB	0	0	1	GCB	0.034	0.04	0.927	GCB	0	0	1	GCB	0.009	0.013	0.978	GCB	0	0.012	0.988	GCB	0.021	0.021	0.959	GCB	0	0	1	GCB	0.084	0.177	0.739	GCB	0.016	0.027	0.957	GCB	0.008	0.023	0.969	GCB
10	GSM274987	GCB	NA	30	10.4	0	GCB	0.897	GCB	0	0	1	GCB	0.019	0	0.981	GCB	0	0	1	GCB	0.009	0.013	0.978	GCB	0.006	0	0.994	GCB	0.021	0.021	0.959	GCB	0	0	1	GCB	0.043	0.016	0.941	GCB	0.037	0.012	0.951	GCB	0.033	0.006	0.961	GCB
107	GSM275054	TypeIII	female	46	4.94	0	GCB	0.897	GCB	0	0	1	GCB	0.034	0.04	0.927	GCB	0	0	1	GCB	0.009	0.013	0.978	GCB	0.003	0.034	0.963	GCB	0.021	0.021	0.959	GCB	0	0	1	GCB	0.084	0.177	0.739	GCB	0	0.02	0.98	GCB	0	0.02	0.98	GCB
11	GSM274925	GCB	male	85	5.38	1	GCB	0.896	GCB	0	0	1	GCB	0.034	0.04	0.927	GCB	0	0	1	GCB	0.009	0.013	0.978	GCB	0.004	0.017	0.979	GCB	0.013	0	0.987	GCB	0	0	1	GCB	0.043	0.016	0.941	GCB	0	0.04	0.96	GCB	0.013	0.029	0.959	GCB
37	GSM274932	GCB	male	49	2.05	1	GCB	0.896	GCB	0	0	1	GCB	0.034	0.04	0.927	GCB	0	0	1	GCB	0	0	1	GCB	0.001	0.001	0.998	GCB	0.003	0	0.997	GCB	0	0	1	GCB	0.043	0.016	0.941	GCB	0.009	0.073	0.917	GCB	0.007	0.047	0.946	GCB
71	GSM274922	GCB	female	54	0.23	1	GCB	0.895	GCB	0	0	1	GCB	0.034	0.04	0.927	GCB	0	0	1	GCB	0.009	0.013	0.978	GCB	0.013	0.003	0.984	GCB	0.021	0.021	0.959	GCB	0	0	1	ABC	0.086	0.803	0.112	GCB	0.03	0.02	0.95	GCB	0.037	0.049	0.914	GCB
25	GSM274943	GCB	male	64	7.11	0	GCB	0.895	GCB	0	0	1	GCB	0.034	0.04	0.927	GCB	0	0	1	GCB	0.009	0.013	0.978	GCB	0.004	0.032	0.964	GCB	0.041	0.013	0.947	GCB	0	0	1	GCB	0.043	0.016	0.941	GCB	0.01	0.02	0.97	GCB	0.028	0.02	0.952	GCB
18	GSM274906	GCB	male	72	4.09	0	GCB	0.892	GCB	0	0	1	GCB	0.034	0.04	0.927	GCB	0	0	1	GCB	0.009	0.013	0.978	GCB	0.011	0.033	0.956	GCB	0.045	0.012	0.943	GCB	0	0	1	GCB	0.084	0.177	0.739	GCB	0	0.03	0.97	GCB	0	0.03	0.97	GCB
73	GSM274969	GCB	female	50	8.76	0	GCB	0.892	GCB	0	0	1	GCB	0.034	0.04	0.927	GCB	0	0	1	GCB	0.009	0.013	0.978	GCB	0.005	0.002	0.993	GCB	0.021	0.021	0.959	GCB	0	0	1	GCB	0.043	0.016	0.941	GCB	0.05	0.02	0.93	GCB	0.05	0.023	0.926	GCB
50	GSM275006	GCB	female	80	4.16	0	GCB	0.892	GCB	0	0	1	GCB	0.034	0.04	0.927	GCB	0	0	1	GCB	0.009	0.013	0.978	GCB	0.043	0.002	0.956	GCB	0	0	1	GCB	0	0	1	GCB	0.201	0.074	0.726	GCB	0.03	0	0.97	GCB	0.045	0.005	0.95	GCB
5	GSM275019	GCB	NA	70	0.42	1	GCB	0.888	GCB	0	0	1	GCB	0.034	0.04	0.927	GCB	0	0	1	GCB	0.009	0.013	0.978	GCB	0.007	0.01	0.983	GCB	0.005	0	0.994	GCB	0	0	1	GCB	0.201	0.074	0.726	GCB	0.02	0.056	0.924	GCB	0.038	0.053	0.909	GCB
38	GSM274907	GCB	male	47	9.11	1	GCB	0.887	GCB	0	0	1	GCB	0.034	0.04	0.927	GCB	0	0	1	GCB	0.119	0	0.881	GCB	0.001	0	0.999	GCB	0.045	0.123	0.832	GCB	0	0	1	GCB	0.043	0.016	0.941	GCB	0	0	1	GCB	0.015	0	0.985	GCB
92	GSM275060	TypeIII	male	56	1.92	1	GCB	0.887	GCB	0	0	1	GCB	0.019	0	0.981	GCB	0	0	1	GCB	0.009	0.013	0.978	GCB	0.016	0.017	0.968	GCB	0.001	0	0.999	GCB	0	0	1	GCB	0.084	0.177	0.739	GCB	0.034	0.03	0.936	GCB	0.022	0.02	0.958	GCB
74	GSM274961	GCB	female	49	8.36	0	GCB	0.886	GCB	0	0	1	GCB	0.034	0.04	0.927	GCB	0	0	1	GCB	0.009	0.013	0.978	GCB	0.003	0.025	0.971	GCB	0.001	0	0.999	GCB	0	0	1	GCB	0.084	0.177	0.739	GCB	0	0.07	0.93	GCB	0	0.065	0.935	GCB
52	GSM274928	GCB	female	76	10.53	0	GCB	0.885	GCB	0	0	1	GCB	0.034	0.04	0.927	GCB	0	0	1	GCB	0.119	0	0.881	GCB	0.002	0	0.998	GCB	0.021	0.021	0.959	GCB	0	0	1	GCB	0.043	0.016	0.941	GCB	0.007	0	0.993	GCB	0.009	0	0.991	GCB
19	GSM274912	GCB	male	72	0.15	1	GCB	0.884	GCB	0	0	1	GCB	0.034	0.04	0.927	GCB	0	0	1	GCB	0.119	0	0.881	GCB	0.003	0.001	0.997	GCB	0.021	0.021	0.959	GCB	0	0	1	GCB	0.084	0.177	0.739	GCB	0.01	0	0.99	GCB	0.01	0	0.99	GCB
24	GSM275005	GCB	male	65	9.47	0	GCB	0.881	GCB	0	0	1	GCB	0.034	0.04	0.927	GCB	0	0	1	GCB	0.119	0	0.881	GCB	0.013	0	0.986	GCB	0.021	0.021	0.959	GCB	0	0	1	GCB	0.043	0.016	0.941	GCB	0.01	0	0.99	GCB	0.01	0	0.99	GCB
48	GSM274908	GCB	female	84	0.33	1	GCB	0.879	GCB	0	0	1	GCB	0.034	0.04	0.927	GCB	0	0	1	GCB	0.119	0	0.881	GCB	0.002	0	0.998	GCB	0.045	0.123	0.832	GCB	0	0	1	GCB	0.043	0.016	0.941	GCB	0.03	0	0.97	GCB	0.029	0	0.971	GCB
58	GSM275020	GCB	female	71	6.45	0	GCB	0.879	GCB	0	0	1	GCB	0.034	0.04	0.927	GCB	0	0	1	GCB	0.119	0	0.881	GCB	0.012	0	0.988	GCB	0.021	0.021	0.959	GCB	0	0	1	GCB	0.043	0.016	0.941	GCB	0.02	0	0.98	GCB	0.041	0.008	0.951	GCB
23	GSM274904	GCB	male	66	15.41	0	GCB	0.873	GCB	0	0	1	GCB	0.034	0.04	0.927	GCB	0	0	1	GCB	0.009	0.013	0.978	GCB	0.006	0.005	0.988	GCB	0.021	0.021	0.959	GCB	0	0	1	GCB	0.043	0.016	0.941	GCB	0.04	0.1	0.86	GCB	0.03	0.081	0.889	GCB
7	GSM274951	GCB	NA	67	12.12	0	GCB	0.872	GCB	0.009	0	0.991	GCB	0.034	0.04	0.927	GCB	0	0	1	GCB	0.009	0.013	0.978	GCB	0.013	0.002	0.985	GCB	0.009	0	0.99	GCB	0	0	1	GCB	0.201	0.074	0.726	GCB	0.09	0.05	0.86	GCB	0.121	0.05	0.829	GCB
57	GSM274976	GCB	female	71	3.47	0	GCB	0.872	GCB	0	0	1	GCB	0.034	0.04	0.927	GCB	0	0	1	GCB	0.119	0	0.881	GCB	0.051	0.001	0.949	TypeIII	0.715	0.088	0.196	GCB	0	0	1	GCB	0.043	0.016	0.941	GCB	0.01	0	0.99	GCB	0.02	0	0.98	GCB
21	GSM275007	GCB	male	69	9.7	0	GCB	0.872	GCB	0	0	1	GCB	0.034	0.04	0.927	GCB	0	0	1	GCB	0.119	0	0.881	GCB	0.006	0.004	0.989	GCB	0.085	0.168	0.747	GCB	0	0	1	GCB	0.084	0.177	0.739	GCB	0.03	0.02	0.95	GCB	0.044	0.035	0.921	GCB
34	GSM274936	GCB	male	54	5.77	0	GCB	0.868	GCB	0	0	1	GCB	0.034	0.04	0.927	GCB	0	0	1	GCB	0.119	0	0.881	GCB	0.024	0	0.976	GCB	0.045	0.123	0.832	GCB	0	0	1	GCB	0.043	0.016	0.941	GCB	0.05	0	0.95	GCB	0.06	0	0.94	GCB
15	GSM274896	GCB	male	75	0.82	1	GCB	0.866	GCB	0	0	1	GCB	0.034	0.04	0.927	GCB	0	0	1	GCB	0.119	0	0.881	GCB	0.015	0	0.985	GCB	0.002	0.053	0.945	TypeIII	1	0	0	GCB	0.043	0.016	0.941	GCB	0.07	0	0.93	GCB	0.045	0.008	0.947	GCB
29	GSM274931	GCB	male	60	11.29	0	GCB	0.866	GCB	0	0	1	GCB	0.034	0.04	0.927	GCB	0	0	1	GCB	0.119	0	0.881	GCB	0.014	0.001	0.985	GCB	0.085	0.168	0.747	GCB	0	0	1	GCB	0	0	1	GCB	0.054	0.016	0.93	GCB	0.036	0.025	0.939	GCB
53	GSM274944	GCB	female	75	6.78	0	GCB	0.866	GCB	0	0	1	GCB	0.034	0.04	0.927	GCB	0	0	1	GCB	0.009	0.013	0.978	GCB	0.028	0.004	0.968	GCB	0.011	0	0.989	GCB	0	0	1	GCB	0.201	0.074	0.726	GCB	0.148	0	0.852	GCB	0.128	0.012	0.86	GCB
84	GSM275069	TypeIII	male	79	0.6	1	GCB	0.865	GCB	0.031	0	0.969	GCB	0.019	0	0.981	GCB	0	0	1	GCB	0.009	0.013	0.978	GCB	0.009	0.036	0.955	GCB	0.017	0.001	0.982	TypeIII	1	0	0	GCB	0.043	0.016	0.941	GCB	0.05	0.09	0.86	GCB	0.153	0.091	0.757	GCB
46	GSM274993	GCB	male	32	4.01	0	GCB	0.86	GCB	0	0	1	GCB	0.034	0.04	0.927	GCB	0	0	1	GCB	0.009	0.013	0.978	GCB	0.055	0.009	0.935	GCB	0.003	0.023	0.974	GCB	0	0	1	GCB	0.043	0.016	0.941	GCB	0.053	0.089	0.858	GCB	0.066	0.082	0.852	GCB
14	GSM274971	GCB	male	76	1.27	1	GCB	0.854	GCB	0	0	1	TypeIII	0.898	0	0.102	GCB	0	0	1	GCB	0.009	0.013	0.978	GCB	0.017	0	0.982	GCB	0.021	0.021	0.959	TypeIII	1	0	0	GCB	0.201	0.074	0.726	GCB	0.191	0.019	0.79	GCB	0.175	0.03	0.795	GCB
36	GSM275009	GCB	male	50	6.65	0	GCB	0.853	GCB	0	0.113	0.887	GCB	0.034	0.04	0.927	GCB	0	0	1	GCB	0.009	0.013	0.978	GCB	0.003	0.034	0.962	GCB	0.003	0	0.997	GCB	0	0	1	GCB	0.084	0.177	0.739	GCB	0.031	0.162	0.807	GCB	0.024	0.202	0.774	GCB
66	GSM275033	GCB	female	60	3.32	0	GCB	0.853	GCB	0.006	0	0.994	GCB	0.034	0.04	0.927	GCB	0	0	1	GCB	0.119	0	0.881	GCB	0.057	0	0.943	TypeIII	0.554	0.137	0.309	GCB	0	0	1	GCB	0.043	0.016	0.941	GCB	0.08	0	0.92	GCB	0.07	0	0.93	GCB
63	GSM274946	GCB	female	61	11.72	0	GCB	0.847	GCB	0.014	0	0.986	GCB	0	0	1	GCB	0	0	1	GCB	0.009	0.013	0.978	GCB	0.015	0.02	0.965	GCB	0	0	1	TypeIII	1	0	0	GCB	0.084	0.177	0.739	GCB	0.159	0.061	0.78	GCB	0.136	0.094	0.77	GCB
9	GSM274990	GCB	NA	44	5.53	0	GCB	0.846	GCB	0.001	0	0.999	GCB	0.034	0.04	0.927	GCB	0	0	1	GCB	0.119	0	0.881	GCB	0.096	0.029	0.875	GCB	0.045	0.123	0.832	GCB	0	0	1	GCB	0.043	0.016	0.941	GCB	0.04	0	0.96	GCB	0.044	0.01	0.946	GCB
31	GSM274939	GCB	male	58	1.06	1	GCB	0.842	GCB	0.001	0	0.999	GCB	0.034	0.04	0.927	GCB	0	0	1	GCB	0.119	0	0.881	GCB	0.076	0.016	0.908	GCB	0.002	0.053	0.945	TypeIII	1	0	0	GCB	0.043	0.016	0.941	GCB	0.08	0.01	0.91	GCB	0.094	0.005	0.901	GCB
35	GSM274895	GCB	male	52	2.68	1	GCB	0.839	GCB	0	0	1	GCB	0.034	0.04	0.927	GCB	0	0	1	GCB	0.119	0	0.881	GCB	0.019	0.045	0.937	GCB	0.002	0.053	0.945	GCB	0	0	1	GCB	0.084	0.177	0.739	GCB	0.1	0.03	0.87	GCB	0.089	0.023	0.888	GCB
3	GSM274989	GCB	NA	73	1.1	1	GCB	0.83	GCB	0.002	0	0.998	GCB	0	0	1	GCB	0	0	1	GCB	0.009	0.013	0.978	GCB	0.052	0.001	0.947	GCB	0	0	1	GCB	0	0	1	GCB	0.043	0.016	0.941	GCB	0.179	0.093	0.728	GCB	0.113	0.067	0.82	GCB
109	GSM275024	ABC	NA	79	2.8	0	GCB	0.824	GCB	0.014	0	0.986	GCB	0.019	0	0.981	GCB	0	0	1	GCB	0.009	0.013	0.978	GCB	0.045	0.013	0.942	GCB	0.131	0.006	0.863	GCB	0	0	1	GCB	0.043	0.016	0.941	GCB	0.211	0.08	0.709	GCB	0.218	0.082	0.7	GCB
156	GSM275018	ABC	female	77	2.13	1	GCB	0.821	GCB	0.02	0.184	0.795	GCB	0.034	0.04	0.927	GCB	0	0	1	GCB	0.009	0.013	0.978	GCB	0.021	0.072	0.907	TypeIII	0.823	0.025	0.152	GCB	0	0	1	GCB	0.084	0.177	0.739	GCB	0.04	0.227	0.733	GCB	0.04	0.243	0.717	GCB
79	GSM275048	TypeIII	NA	55	0.97	0	GCB	0.82	GCB	0.013	0.014	0.973	GCB	0	0.039	0.961	GCB	0	0	1	GCB	0	0.111	0.889	GCB	0.026	0.056	0.917	GCB	0.06	0.051	0.889	GCB	0	0	1	GCB	0.084	0.177	0.739	GCB	0.041	0.15	0.809	GCB	0.022	0.164	0.814	GCB
77	GSM275047	TypeIII	NA	75	2.69	0	GCB	0.805	GCB	0.093	0.006	0.901	TypeIII	0.898	0	0.102	GCB	0	0	1	GCB	0	0.111	0.889	GCB	0.053	0.12	0.827	ABC	0.046	0.499	0.456	GCB	0.119	0	0.881	GCB	0.084	0.177	0.739	GCB	0.07	0.092	0.837	GCB	0.065	0.099	0.836	GCB
12	GSM274962	GCB	male	79	3.03	1	GCB	0.804	GCB	0	0	1	TypeIII	0.982	0.018	0	GCB	0	0	1	GCB	0.119	0	0.881	GCB	0.032	0.011	0.957	GCB	0.049	0.096	0.855	GCB	0	0	1	GCB	0.043	0.016	0.941	GCB	0.21	0.077	0.713	GCB	0.205	0.085	0.71	TypeIII
64	GSM274963	GCB	female	60	5.88	0	GCB	0.804	GCB	0.007	0	0.993	GCB	0.034	0.04	0.927	GCB	0	0	1	GCB	0.119	0	0.881	GCB	0.124	0.049	0.828	GCB	0.003	0.023	0.974	GCB	0	0	1	GCB	0.043	0.016	0.941	GCB	0.131	0.029	0.841	GCB	0.141	0.024	0.835	GCB
65	GSM275030	GCB	female	60	1.08	1	GCB	0.803	GCB	0	0	1	GCB	0.034	0.04	0.927	GCB	0	0	1	GCB	0.199	0	0.801	GCB	0.123	0.002	0.876	GCB	0.003	0.023	0.974	TypeIII	1	0	0	GCB	0.043	0.016	0.941	GCB	0.12	0.01	0.87	GCB	0.108	0.005	0.887	GCB
40	GSM274991	GCB	male	47	3.43	0	GCB	0.798	GCB	0	0	1	GCB	0	0	1	GCB	0	0	1	GCB	0.119	0	0.881	GCB	0.142	0.001	0.856	GCB	0.045	0.123	0.832	GCB	0	0	1	GCB	0.043	0.016	0.941	GCB	0.204	0.01	0.786	GCB	0.175	0.013	0.812	GCB
41	GSM274994	GCB	male	45	4.29	0	GCB	0.792	GCB	0.032	0	0.968	GCB	0.019	0	0.981	GCB	0	0	1	GCB	0.119	0	0.881	GCB	0.074	0.002	0.924	GCB	0.049	0.096	0.855	GCB	0	0	1	GCB	0.043	0.016	0.941	GCB	0.296	0.01	0.694	GCB	0.266	0.01	0.724	GCB
6	GSM275004	GCB	NA	68	0.1	1	GCB	0.784	GCB	0.021	0	0.979	GCB	0.034	0.04	0.927	GCB	0	0	1	GCB	0.009	0.013	0.978	GCB	0.034	0.129	0.837	GCB	0.19	0.149	0.661	GCB	0	0	1	GCB	0.043	0.016	0.941	GCB	0.07	0.277	0.653	GCB	0.085	0.243	0.672	GCB
94	GSM275055	TypeIII	male	45	5.24	0	GCB	0.781	TypeIII	0.431	0.172	0.397	TypeIII	0.898	0	0.102	GCB	0	0	1	GCB	0.009	0.013	0.978	GCB	0.056	0.003	0.942	TypeIII	0.6	0.267	0.133	TypeIII	1	0	0	GCB	0.201	0.074	0.726	GCB	0.315	0.147	0.538	GCB	0.387	0.146	0.467	GCB
98	GSM275051	TypeIII	female	74	9.02	0	GCB	0.762	TypeIII	0.578	0	0.422	GCB	0	0	1	GCB	0	0	1	GCB	0.009	0.013	0.978	GCB	0.073	0.103	0.824	GCB	0.223	0.016	0.761	TypeIII	1	0	0	GCB	0.201	0.074	0.726	GCB	0.255	0.165	0.58	GCB	0.264	0.197	0.539	GCB
93	GSM274913	TypeIII	male	52	3.9	0	GCB	0.758	GCB	0.032	0	0.968	GCB	0.034	0.04	0.927	GCB	0	0	1	GCB	0.119	0	0.881	GCB	0.236	0.03	0.733	GCB	0.085	0.168	0.747	GCB	0	0	1	GCB	0.043	0.016	0.941	GCB	0.197	0.05	0.753	GCB	0.197	0.05	0.754	GCB
85	GSM275065	TypeIII	male	77	1.64	1	GCB	0.749	GCB	0	0	0.999	GCB	0	0.039	0.961	GCB	0.454	0.072	0.474	GCB	0	0.111	0.889	GCB	0.115	0.31	0.575	GCB	0.003	0.023	0.974	GCB	0	0	1	GCB	0.084	0.177	0.739	GCB	0.038	0.095	0.867	GCB	0.051	0.127	0.822	GCB
13	GSM274929	GCB	male	78	9.65	0	GCB	0.743	GCB	0.003	0.001	0.996	ABC	0	0.968	0.032	GCB	0.09	0.145	0.764	GCB	0	0.111	0.889	GCB	0.033	0.345	0.622	GCB	0.032	0	0.968	GCB	0	0	1	GCB	0.084	0.177	0.739	GCB	0.086	0.119	0.795	GCB	0.058	0.134	0.807	ABC
59	GSM274952	GCB	female	70	10.62	1	GCB	0.74	GCB	0.001	0	0.999	GCB	0	0	1	GCB	0	0	1	GCB	0.119	0	0.881	GCB	0.305	0.002	0.693	GCB	0.045	0.123	0.832	GCB	0	0	1	GCB	0.043	0.016	0.941	GCB	0.235	0.047	0.717	GCB	0.246	0.034	0.72	GCB
133	GSM274953	ABC	male	56	11.38	0	GCB	0.734	GCB	0.243	0.139	0.619	GCB	0	0	1	GCB	0	0	1	GCB	0	0.111	0.889	GCB	0.054	0.103	0.843	GCB	0.021	0.021	0.959	TypeIII	1	0	0	ABC	0.086	0.803	0.112	GCB	0.184	0.278	0.538	GCB	0.218	0.295	0.487	GCB
95	GSM275062	TypeIII	male	43	9.99	0	GCB	0.727	GCB	0.011	0.111	0.878	GCB	0.019	0	0.981	TypeIII	0.701	0.192	0.107	GCB	0	0.111	0.889	GCB	0.034	0.175	0.791	ABC	0.118	0.515	0.367	ABC	0	1	0	GCB	0.084	0.177	0.739	GCB	0.238	0.201	0.561	GCB	0.175	0.197	0.627	GCB
149	GSM274978	ABC	male	14	1.65	0	GCB	0.661	TypeIII	0.891	0.001	0.108	ABC	0	1	0	GCB	0	0	1	GCB	0.009	0.013	0.978	GCB	0.049	0.305	0.646	GCB	0.386	0.187	0.427	TypeIII	1	0	0	GCB	0.201	0.074	0.726	GCB	0.337	0.308	0.355	GCB	0.287	0.344	0.369	ABC
16	GSM275041	GCB	male	75	0.72	1	GCB	0.658	GCB	0	0	1	GCB	0	0	1	GCB	0	0	1	ABC	0	0.848	0.152	GCB	0.003	0.001	0.995	GCB	0.092	0.027	0.882	GCB	0	0	1	GCB	0.084	0.177	0.739	GCB	0.073	0.11	0.817	GCB	0.057	0.095	0.848	GCB
106	GSM275049	TypeIII	female	52	1.18	1	GCB	0.653	GCB	0	0	1	GCB	0	0	1	GCB	0	0	1	ABC	0	0.848	0.152	GCB	0.005	0.009	0.986	GCB	0.08	0.257	0.664	ABC	0	1	0	GCB	0.084	0.177	0.739	GCB	0.081	0.111	0.808	GCB	0.096	0.117	0.787	GCB
8	GSM274992	GCB	NA	51	6.87	1	GCB	0.644	GCB	0	0	1	GCB	0	0	1	GCB	0	0	1	ABC	0	0.848	0.152	GCB	0.022	0.011	0.967	GCB	0.08	0.257	0.664	ABC	0	1	0	GCB	0.043	0.016	0.941	GCB	0.124	0.085	0.791	GCB	0.069	0.083	0.848	GCB
100	GSM275072	TypeIII	female	70	2.26	1	GCB	0.61	GCB	0.445	0.107	0.448	GCB	0	0	1	GCB	0	0	1	TypeIII	0.667	0	0.333	GCB	0.08	0.036	0.883	TypeIII	0.594	0.093	0.313	TypeIII	1	0	0	GCB	0.201	0.074	0.726	GCB	0.209	0.234	0.556	GCB	0.208	0.205	0.588	GCB
70	GSM275034	GCB	female	55	1.4	1	GCB	0.596	GCB	0.001	0	0.999	GCB	0.034	0.04	0.927	GCB	0	0	1	TypeIII	0.993	0.007	0	GCB	0.024	0.001	0.975	GCB	0.021	0.021	0.959	GCB	0	0	1	TypeIII	0.908	0	0.092	GCB	0.232	0.025	0.744	GCB	0.232	0.012	0.756	GCB
105	GSM275071	TypeIII	female	55	6.72	0	GCB	0.593	GCB	0	0	1	ABC	0.058	0.923	0.019	GCB	0	0	1	ABC	0	0.848	0.152	GCB	0.047	0.074	0.879	TypeIII	0.846	0.025	0.129	TypeIII	1	0	0	GCB	0.043	0.016	0.941	GCB	0.104	0.224	0.673	GCB	0.102	0.234	0.664	ABC
103	GSM275061	TypeIII	female	59	1.01	1	GCB	0.589	TypeIII	0.701	0.279	0.02	GCB	0	0	1	GCB	0.084	0.064	0.852	GCB	0.009	0.013	0.978	ABC	0.07	0.545	0.385	GCB	0.386	0.187	0.427	ABC	0	1	0	ABC	0.086	0.803	0.112	ABC	0.169	0.505	0.326	ABC	0.153	0.532	0.315	GCB
20	GSM274973	GCB	male	72	0.56	0	GCB	0.577	GCB	0.022	0	0.978	TypeIII	0.898	0	0.102	GCB	0	0	1	TypeIII	0.805	0.065	0.13	GCB	0.088	0.001	0.911	GCB	0.176	0.144	0.68	TypeIII	1	0	0	GCB	0.201	0.074	0.726	GCB	0.36	0.04	0.6	GCB	0.357	0.03	0.613	GCB
86	GSM275058	TypeIII	male	67	3.35	0	GCB	0.564	TypeIII	0.929	0.001	0.07	TypeIII	1	0	0	GCB	0.027	0.009	0.963	GCB	0.009	0.013	0.978	ABC	0.259	0.49	0.251	GCB	0.242	0.022	0.736	ABC	0	1	0	ABC	0.086	0.803	0.112	GCB	0.319	0.322	0.359	GCB	0.28	0.331	0.389	TypeIII
97	GSM275074	TypeIII	female	79	12.34	0	GCB	0.549	GCB	0	0.002	0.997	GCB	0	0	1	GCB	0.006	0.317	0.677	ABC	0.096	0.904	0	GCB	0.017	0.259	0.724	GCB	0.041	0.013	0.947	GCB	0	0	1	ABC	0.086	0.803	0.112	GCB	0.015	0.18	0.805	GCB	0.035	0.201	0.765	GCB
166	GSM274967	ABC	female	68	1.22	1	GCB	0.535	ABC	0	0.999	0.001	ABC	0.058	0.923	0.019	ABC	0	1	0	GCB	0	0	1	ABC	0.004	0.803	0.193	ABC	0.03	0.956	0.014	GCB	0	0	1	ABC	0.086	0.803	0.112	GCB	0.04	0.348	0.612	GCB	0.039	0.369	0.593	ABC
28	GSM275000	GCB	male	62	0.71	1	GCB	0.533	GCB	0.01	0	0.99	GCB	0.019	0	0.981	TypeIII	0.954	0.006	0.04	GCB	0.119	0	0.881	TypeIII	0.736	0.007	0.257	GCB	0.049	0.096	0.855	GCB	0	0	1	GCB	0.043	0.016	0.941	GCB	0.331	0.01	0.659	GCB	0.341	0.01	0.649	GCB
101	GSM275052	TypeIII	female	65	4.47	1	GCB	0.489	TypeIII	0.553	0	0.446	TypeIII	0.973	0	0.027	TypeIII	0.78	0.001	0.219	TypeIII	0.805	0.065	0.13	GCB	0.211	0.014	0.775	GCB	0.485	0.001	0.514	TypeIII	1	0	0	TypeIII	0.875	0.125	0	TypeIII	0.553	0.063	0.384	TypeIII	0.551	0.082	0.367	TypeIII
55	GSM274905	GCB	female	72	7.22	0	GCB	0.486	GCB	0.068	0	0.932	GCB	0.034	0.04	0.927	ABC	0.011	0.612	0.376	ABC	0	0.838	0.162	GCB	0.072	0.146	0.782	GCB	0.067	0.224	0.71	ABC	0	1	0	GCB	0.201	0.074	0.726	ABC	0.152	0.515	0.333	ABC	0.142	0.472	0.386	ABC
30	GSM274927	GCB	male	59	5.88	0	GCB	0.442	TypeIII	0.984	0	0.016	TypeIII	0.973	0	0.027	GCB	0	0	1	ABC	0.016	0.984	0	GCB	0.192	0.037	0.771	GCB	0.06	0.001	0.939	TypeIII	1	0	0	GCB	0.201	0.074	0.726	TypeIII	0.584	0.086	0.33	TypeIII	0.539	0.083	0.378	TypeIII
96	GSM275053	TypeIII	male	42	1.64	0	GCB	0.396	TypeIII	0.849	0.066	0.086	TypeIII	0.973	0	0.027	ABC	0.254	0.682	0.064	GCB	0	0.111	0.889	ABC	0.225	0.391	0.384	ABC	0.191	0.7	0.109	TypeIII	1	0	0	GCB	0.201	0.074	0.726	TypeIII	0.454	0.236	0.31	TypeIII	0.468	0.238	0.295	TypeIII
60	GSM274959	GCB	female	70	7.24	0	TypeIII	0.888	TypeIII	0.996	0	0.004	TypeIII	0.973	0	0.027	TypeIII	0.997	0	0.003	TypeIII	0.993	0.007	0	TypeIII	0.957	0.001	0.042	TypeIII	0.703	0.107	0.19	TypeIII	1	0	0	TypeIII	0.908	0	0.092	TypeIII	0.936	0	0.064	TypeIII	0.898	0.01	0.092	TypeIII
80	GSM275023	TypeIII	NA	51	0.05	1	TypeIII	0.86	TypeIII	1	0	0	TypeIII	1	0	0	TypeIII	0.997	0.003	0	TypeIII	0.993	0.007	0	TypeIII	0.998	0.002	0	TypeIII	0.703	0.107	0.19	TypeIII	1	0	0	TypeIII	0.855	0.145	0	TypeIII	0.783	0.16	0.057	TypeIII	0.739	0.146	0.116	TypeIII
68	GSM275026	GCB	female	58	1.24	1	TypeIII	0.857	TypeIII	0.901	0	0.099	TypeIII	0.973	0	0.027	TypeIII	0.983	0.001	0.017	TypeIII	0.993	0.007	0	TypeIII	0.93	0.002	0.068	TypeIII	0.986	0.009	0.004	TypeIII	1	0	0	TypeIII	0.908	0	0.092	TypeIII	0.84	0	0.16	TypeIII	0.805	0.015	0.18	TypeIII
72	GSM275043	GCB	female	52	3.4	0	TypeIII	0.855	TypeIII	1	0	0	TypeIII	0.973	0	0.027	TypeIII	0.991	0	0.009	TypeIII	0.993	0.007	0	TypeIII	0.932	0.006	0.062	TypeIII	0.955	0.026	0.019	TypeIII	1	0	0	TypeIII	0.908	0	0.092	TypeIII	0.827	0.043	0.129	TypeIII	0.884	0.032	0.085	TypeIII
87	GSM275066	TypeIII	male	62	0	1	TypeIII	0.833	TypeIII	0.841	0	0.159	TypeIII	0.973	0	0.027	TypeIII	0.938	0.001	0.06	TypeIII	0.993	0.007	0	TypeIII	0.982	0.006	0.012	TypeIII	0.955	0.026	0.019	TypeIII	1	0	0	TypeIII	0.908	0	0.092	TypeIII	0.69	0.039	0.272	TypeIII	0.717	0.019	0.264	TypeIII
81	GSM275067	TypeIII	male	85	1.51	1	TypeIII	0.826	TypeIII	0.999	0	0.001	TypeIII	0.982	0.018	0	TypeIII	0.977	0	0.023	TypeIII	0.993	0.007	0	TypeIII	0.875	0.024	0.101	TypeIII	0.986	0.009	0.004	TypeIII	1	0	0	TypeIII	0.908	0	0.092	TypeIII	0.771	0.082	0.146	TypeIII	0.763	0.096	0.141	TypeIII
83	GSM275057	TypeIII	male	79	0.11	1	TypeIII	0.8	TypeIII	0.99	0	0.009	TypeIII	0.982	0.018	0	TypeIII	0.888	0	0.112	TypeIII	0.993	0.007	0	TypeIII	0.822	0.037	0.141	TypeIII	0.4	0.356	0.244	TypeIII	1	0	0	TypeIII	0.908	0	0.092	TypeIII	0.72	0.086	0.194	TypeIII	0.705	0.109	0.186	TypeIII
179	GSM274997	ABC	female	45	16.79	0	TypeIII	0.741	TypeIII	0.999	0.001	0	ABC	0	1	0	TypeIII	0.812	0.186	0.002	TypeIII	0.993	0.007	0	TypeIII	0.682	0.296	0.022	TypeIII	0.563	0.17	0.267	TypeIII	1	0	0	TypeIII	0.855	0.145	0	TypeIII	0.623	0.347	0.03	TypeIII	0.626	0.329	0.045	ABC
137	GSM274968	ABC	male	49	10.75	0	TypeIII	0.722	TypeIII	0.992	0.008	0	ABC	0	1	0	TypeIII	0.799	0.201	0	TypeIII	1	0	0	TypeIII	0.662	0.335	0.003	TypeIII	0.977	0.022	0.001	TypeIII	1	0	0	ABC	0.086	0.803	0.112	TypeIII	0.558	0.442	0	TypeIII	0.565	0.408	0.026	ABC
104	GSM275075	TypeIII	female	59	3.13	1	TypeIII	0.656	TypeIII	0.932	0.004	0.064	TypeIII	1	0	0	TypeIII	0.486	0.243	0.271	TypeIII	0.881	0	0.119	TypeIII	0.615	0.288	0.097	ABC	0.064	0.933	0.003	TypeIII	1	0	0	GCB	0.084	0.177	0.739	TypeIII	0.461	0.22	0.318	TypeIII	0.52	0.223	0.257	TypeIII
89	GSM275064	TypeIII	male	61	11.02	1	TypeIII	0.654	TypeIII	0.998	0	0.002	TypeIII	0.973	0	0.027	TypeIII	0.837	0.077	0.086	TypeIII	0.805	0.065	0.13	GCB	0.476	0.034	0.491	TypeIII	0.662	0.296	0.042	ABC	0	1	0	GCB	0.201	0.074	0.726	TypeIII	0.67	0.234	0.096	TypeIII	0.685	0.227	0.088	TypeIII
90	GSM275073	TypeIII	male	59	0.03	1	TypeIII	0.651	TypeIII	0.956	0	0.044	GCB	0	0	1	TypeIII	0.972	0.002	0.027	TypeIII	0.667	0	0.333	TypeIII	0.691	0.067	0.241	TypeIII	0.922	0.022	0.056	TypeIII	1	0	0	TypeIII	0.875	0.125	0	TypeIII	0.581	0.157	0.262	TypeIII	0.578	0.174	0.248	GCB
62	GSM275038	GCB	female	66	2.48	0	TypeIII	0.626	TypeIII	0.993	0	0.007	TypeIII	1	0	0	TypeIII	0.678	0	0.321	TypeIII	0.993	0.007	0	TypeIII	0.521	0.064	0.415	GCB	0.242	0.022	0.736	TypeIII	1	0	0	TypeIII	0.908	0	0.092	TypeIII	0.656	0.052	0.292	TypeIII	0.697	0.061	0.242	TypeIII
164	GSM274985	ABC	female	70	4.13	1	TypeIII	0.587	TypeIII	0.974	0.026	0	ABC	0.058	0.923	0.019	TypeIII	0.989	0.011	0	ABC	0.016	0.984	0	TypeIII	0.942	0.057	0.001	TypeIII	0.697	0.302	0.001	TypeIII	1	0	0	TypeIII	0.875	0.125	0	TypeIII	0.726	0.206	0.068	TypeIII	0.673	0.265	0.063	ABC
82	GSM275070	TypeIII	male	83	0.33	1	TypeIII	0.559	TypeIII	0.995	0.004	0	GCB	0	0	1	TypeIII	0.954	0.039	0.006	GCB	0.199	0	0.801	TypeIII	0.791	0.155	0.054	TypeIII	0.986	0.009	0.004	TypeIII	1	0	0	TypeIII	0.855	0.145	0	TypeIII	0.582	0.221	0.198	TypeIII	0.592	0.203	0.205	GCB
45	GSM274955	GCB	male	32	0.76	1	TypeIII	0.553	GCB	0.201	0	0.799	TypeIII	0.973	0	0.027	TypeIII	0.702	0.001	0.296	TypeIII	0.993	0.007	0	TypeIII	0.544	0.006	0.45	GCB	0.045	0.123	0.832	TypeIII	1	0	0	GCB	0.084	0.177	0.739	GCB	0.344	0.041	0.615	GCB	0.408	0.03	0.562	TypeIII
17	GSM275012	GCB	male	73	1.1	1	TypeIII	0.534	TypeIII	0.999	0	0.001	TypeIII	0.973	0	0.027	TypeIII	0.951	0.005	0.044	GCB	0.009	0.013	0.978	TypeIII	0.85	0.091	0.059	TypeIII	0.903	0.056	0.042	TypeIII	1	0	0	TypeIII	0.855	0.145	0	TypeIII	0.609	0.176	0.215	TypeIII	0.65	0.139	0.211	TypeIII
145	GSM275042	ABC	male	40	1.59	1	TypeIII	0.522	TypeIII	0.6	0.4	0	ABC	0.058	0.923	0.019	TypeIII	0.995	0.002	0.003	ABC	0.016	0.984	0	TypeIII	0.843	0.096	0.061	ABC	0.057	0.943	0	TypeIII	1	0	0	TypeIII	0.875	0.125	0	TypeIII	0.565	0.346	0.089	TypeIII	0.565	0.349	0.087	ABC
155	GSM274980	ABC	female	77	0.06	1	TypeIII	0.519	TypeIII	0.508	0.492	0	ABC	0	1	0	TypeIII	0.628	0.366	0.006	TypeIII	1	0	0	TypeIII	0.5	0.385	0.115	TypeIII	0.614	0.371	0.015	ABC	0	1	0	ABC	0.086	0.803	0.112	ABC	0.242	0.66	0.098	ABC	0.268	0.633	0.099	ABC
148	GSM274958	ABC	male	35	1.7	1	TypeIII	0.516	TypeIII	0.686	0.314	0	TypeIII	1	0	0	TypeIII	0.993	0.007	0	TypeIII	0.667	0	0.333	ABC	0.453	0.543	0.004	TypeIII	0.843	0.136	0.021	TypeIII	1	0	0	TypeIII	0.875	0.125	0	TypeIII	0.612	0.327	0.061	TypeIII	0.586	0.375	0.04	TypeIII
181	GSM274901	ABC	female	18	0.05	1	TypeIII	0.505	TypeIII	0.713	0.287	0	TypeIII	1	0	0	TypeIII	0.948	0.052	0	TypeIII	1	0	0	ABC	0.234	0.76	0.006	ABC	0.041	0.959	0	ABC	0	1	0	ABC	0.086	0.803	0.112	ABC	0.455	0.488	0.057	TypeIII	0.46	0.449	0.091	TypeIII
99	GSM275068	TypeIII	female	72	1.67	0	TypeIII	0.498	TypeIII	0.999	0	0.001	TypeIII	0.973	0	0.027	TypeIII	0.709	0.011	0.28	ABC	0.016	0.984	0	TypeIII	0.58	0.317	0.103	ABC	0.285	0.541	0.174	ABC	0	1	0	TypeIII	0.875	0.125	0	TypeIII	0.73	0.11	0.16	TypeIII	0.697	0.132	0.171	TypeIII
154	GSM275044	ABC	female	81	3.58	1	TypeIII	0.467	TypeIII	0.992	0	0.008	TypeIII	1	0	0	TypeIII	0.962	0.026	0.012	GCB	0.009	0.013	0.978	TypeIII	0.612	0.376	0.012	GCB	0.386	0.187	0.427	TypeIII	1	0	0	GCB	0.201	0.074	0.726	TypeIII	0.581	0.23	0.188	TypeIII	0.556	0.25	0.194	TypeIII
51	GSM274935	GCB	female	78	1.33	1	TypeIII	0.355	GCB	0.009	0	0.991	ABC	0.058	0.923	0.019	GCB	0.361	0.01	0.63	ABC	0.016	0.984	0	TypeIII	0.533	0.022	0.444	GCB	0.002	0	0.998	TypeIII	1	0	0	GCB	0.201	0.074	0.726	TypeIII	0.539	0.169	0.292	TypeIII	0.555	0.18	0.265	ABC
[truncated: 89 more columns]

## Sheet: GSE10846_CHOP_GeneSelection
									TRAIN GSE10846 RCHOP
							WrightTrained		LMT_J48_RF100_SMO
OriginalOrder	Sample	GEO_Class	Sex	Age	Follow-up	Follow-up Status	ClassLMT_J48_RF100_SMO_TrainWright	MaxConf	ClassWright20	MaxWright20	TypeIII	GCB	ABC	ClassWright10	MaxWright10	TypeIII	GCB	ABC	ClassWright5	MaxWright10	TypeIII	GCB	ABC	ClassDave185	Max185	TypeIII	GCB	ABC	ClassDave100	Max100	TypeIII	GCB	ABC	ClassDave50	Max50	TypeIII	GCB	ABC	ClassDave20	Max20	TypeIII	GCB	ABC	ClassDave10	Max10	TypeIII	GCB	ABC	ClassAll185
150	GSM274972	ABC	female	84	0.2	1	ABC	0.905	ABC	0.91	0.087	0.003	0.91	ABC	0.917	0.083	0	0.917	ABC	0.898	0.102	0	0.898	ABC	0.916	0.084	0	0.916	ABC	0.909	0.091	0	0.909	ABC	0.917	0.083	0	0.917	ABC	0.917	0.083	0	0.917	ABC	0.913	0.087	0	0.913	ABC
120	GSM275011	ABC	male	73	1.31	1	ABC	0.903	ABC	0.905	0.087	0.008	0.905	ABC	0.902	0.088	0.01	0.902	ABC	0.885	0.103	0.013	0.885	ABC	0.856	0.117	0.028	0.856	ABC	0.871	0.116	0.013	0.871	ABC	0.895	0.095	0.01	0.895	ABC	0.907	0.091	0.003	0.907	ABC	0.905	0.089	0.005	0.905	ABC
177	GSM274919	ABC	female	57	0.25	1	ABC	0.901	ABC	0.902	0.094	0.003	0.902	ABC	0.908	0.084	0.008	0.908	ABC	0.888	0.11	0.003	0.888	ABC	0.874	0.111	0.015	0.874	ABC	0.892	0.093	0.015	0.892	ABC	0.869	0.111	0.02	0.869	ABC	0.89	0.104	0.005	0.89	ABC	0.867	0.097	0.037	0.867	ABC
125	GSM274960	ABC	male	68	7.72	0	ABC	0.891	ABC	0.905	0.092	0.003	0.905	ABC	0.908	0.092	0	0.908	ABC	0.893	0.107	0	0.893	ABC	0.891	0.104	0.005	0.891	ABC	0.892	0.093	0.015	0.892	ABC	0.902	0.088	0.01	0.902	ABC	0.908	0.089	0.003	0.908	ABC	0.876	0.096	0.028	0.876	ABC
180	GSM274981	ABC	female	26	10.53	0	ABC	0.884	ABC	0.622	0.337	0.041	0.622	ABC	0.532	0.195	0.273	0.532	ABC	0.543	0.419	0.038	0.543	ABC	0.575	0.395	0.031	0.575	ABC	0.612	0.366	0.023	0.612	ABC	0.61	0.373	0.018	0.61	ABC	0.681	0.27	0.048	0.681	ABC	0.585	0.307	0.109	0.585	ABC
132	GSM274914	ABC	male	56	5	0	ABC	0.882	ABC	0.91	0.087	0.003	0.91	ABC	0.916	0.084	0	0.916	ABC	0.897	0.103	0	0.897	ABC	0.894	0.096	0.01	0.894	ABC	0.897	0.101	0.003	0.897	ABC	0.909	0.088	0.003	0.909	ABC	0.913	0.087	0	0.913	ABC	0.9	0.1	0	0.9	ABC
119	GSM275022	ABC	male	74	1.04	1	ABC	0.88	ABC	0.91	0.087	0.003	0.91	ABC	0.917	0.083	0	0.917	ABC	0.903	0.097	0	0.903	ABC	0.899	0.096	0.005	0.899	ABC	0.912	0.086	0.003	0.912	ABC	0.917	0.083	0	0.917	ABC	0.917	0.083	0	0.917	ABC	0.914	0.086	0	0.914	ABC
118	GSM275014	ABC	male	74	2.59	1	ABC	0.871	ABC	0.895	0.097	0.008	0.895	ABC	0.897	0.088	0.015	0.897	ABC	0.88	0.11	0.01	0.88	ABC	0.892	0.096	0.013	0.892	ABC	0.889	0.086	0.025	0.889	ABC	0.889	0.091	0.02	0.889	ABC	0.904	0.096	0	0.904	ABC	0.898	0.091	0.011	0.898	ABC
173	GSM274933	ABC	female	63	2.31	1	ABC	0.865	ABC	0.907	0.09	0.003	0.907	ABC	0.916	0.084	0	0.916	ABC	0.898	0.102	0	0.898	ABC	0.872	0.103	0.025	0.872	ABC	0.869	0.113	0.018	0.869	ABC	0.906	0.089	0.005	0.906	ABC	0.911	0.089	0	0.911	ABC	0.901	0.098	0	0.901	ABC
122	GSM274957	ABC	male	71	2.82	1	ABC	0.865	ABC	0.902	0.095	0.003	0.902	ABC	0.911	0.089	0	0.911	ABC	0.894	0.106	0	0.894	ABC	0.878	0.102	0.02	0.878	ABC	0.879	0.108	0.013	0.879	ABC	0.891	0.106	0.003	0.891	ABC	0.913	0.087	0	0.913	ABC	0.909	0.091	0	0.909	ABC
117	GSM275001	ABC	male	74	0.31	1	ABC	0.863	ABC	0.889	0.108	0.003	0.889	ABC	0.866	0.126	0.008	0.866	ABC	0.892	0.108	0	0.892	ABC	0.879	0.109	0.013	0.879	ABC	0.854	0.121	0.025	0.854	ABC	0.872	0.118	0.01	0.872	ABC	0.848	0.139	0.013	0.848	ABC	0.806	0.182	0.011	0.806	ABC
128	GSM274974	ABC	male	66	0.29	1	ABC	0.862	ABC	0.886	0.104	0.01	0.886	ABC	0.581	0.144	0.275	0.581	ABC	0.545	0.435	0.02	0.545	ABC	0.867	0.111	0.023	0.867	ABC	0.864	0.121	0.015	0.864	ABC	0.872	0.118	0.01	0.872	ABC	0.773	0.218	0.01	0.773	ABC	0.737	0.242	0.021	0.737	ABC
157	GSM274897	ABC	female	76	2.54	1	ABC	0.857	ABC	0.89	0.107	0.003	0.89	ABC	0.872	0.128	0	0.872	ABC	0.861	0.139	0	0.861	ABC	0.845	0.142	0.013	0.845	ABC	0.889	0.103	0.008	0.889	ABC	0.896	0.104	0	0.896	ABC	0.906	0.094	0	0.906	ABC	0.897	0.103	0	0.897	ABC
165	GSM274975	ABC	female	69	7.49	1	ABC	0.857	ABC	0.91	0.087	0.003	0.91	ABC	0.916	0.084	0	0.916	ABC	0.884	0.116	0	0.884	ABC	0.9	0.097	0.003	0.9	ABC	0.907	0.091	0.003	0.907	ABC	0.917	0.083	0	0.917	ABC	0.916	0.084	0	0.916	ABC	0.907	0.092	0	0.907	ABC
115	GSM275032	ABC	male	78	0.42	1	ABC	0.852	ABC	0.881	0.108	0.011	0.881	ABC	0.893	0.107	0.001	0.893	ABC	0.835	0.162	0.003	0.835	ABC	0.891	0.097	0.013	0.891	ABC	0.874	0.116	0.01	0.874	ABC	0.899	0.098	0.003	0.899	ABC	0.916	0.084	0	0.916	ABC	0.913	0.086	0.001	0.913	ABC
172	GSM274921	ABC	female	63	2.31	1	ABC	0.847	ABC	0.91	0.087	0.003	0.91	ABC	0.917	0.083	0	0.917	ABC	0.898	0.102	0	0.898	ABC	0.903	0.089	0.008	0.903	ABC	0.902	0.091	0.008	0.902	ABC	0.909	0.086	0.005	0.909	ABC	0.917	0.083	0	0.917	ABC	0.914	0.086	0	0.914	ABC
159	GSM274926	ABC	female	75	0.34	1	ABC	0.836	ABC	0.876	0.107	0.017	0.876	ABC	0.866	0.121	0.013	0.866	ABC	0.858	0.135	0.006	0.858	ABC	0.877	0.11	0.013	0.877	ABC	0.899	0.093	0.008	0.899	ABC	0.899	0.099	0.003	0.899	ABC	0.908	0.091	0.001	0.908	ABC	0.887	0.106	0.008	0.887	ABC
141	GSM275025	ABC	male	45	0.6	1	ABC	0.834	ABC	0.905	0.089	0.006	0.905	ABC	0.917	0.083	0	0.917	ABC	0.9	0.1	0	0.9	ABC	0.889	0.101	0.01	0.889	ABC	0.907	0.093	0	0.907	ABC	0.912	0.088	0	0.912	ABC	0.914	0.086	0	0.914	ABC	0.915	0.085	0	0.915	ABC
151	GSM275017	ABC	female	81	7.81	0	ABC	0.829	ABC	0.876	0.113	0.011	0.876	ABC	0.877	0.11	0.013	0.877	ABC	0.884	0.116	0	0.884	ABC	0.849	0.121	0.03	0.849	ABC	0.866	0.111	0.023	0.866	ABC	0.89	0.105	0.005	0.89	ABC	0.893	0.102	0.005	0.893	ABC	0.895	0.104	0.001	0.895	ABC
123	GSM275010	ABC	male	70	0.69	1	ABC	0.825	ABC	0.6	0.2	0.2	0.6	ABC	0.537	0.45	0.013	0.537	ABC	0.532	0.437	0.031	0.532	ABC	0.517	0.414	0.069	0.517	ABC	0.558	0.15	0.293	0.558	ABC	0.528	0.439	0.033	0.528	TYPEIII	0.695	0.695	0.06	0.245	TYPEIII	0.571	0.571	0.07	0.359	ABC
147	GSM274900	ABC	male	36	7.21	0	ABC	0.824	ABC	0.884	0.11	0.006	0.884	ABC	0.877	0.12	0.003	0.877	ABC	0.889	0.111	0	0.889	ABC	0.844	0.141	0.016	0.844	ABC	0.883	0.109	0.008	0.883	ABC	0.854	0.141	0.005	0.854	ABC	0.906	0.094	0	0.906	ABC	0.832	0.154	0.014	0.832	ABC
112	GSM275027	ABC	male	83	0.16	1	ABC	0.821	ABC	0.895	0.094	0.011	0.895	ABC	0.911	0.089	0	0.911	ABC	0.874	0.123	0.003	0.874	ABC	0.904	0.089	0.008	0.904	ABC	0.914	0.086	0	0.914	ABC	0.909	0.091	0	0.909	ABC	0.917	0.083	0	0.917	ABC	0.914	0.086	0	0.914	ABC
178	GSM274898	ABC	female	56	9.67	0	ABC	0.815	ABC	0.884	0.108	0.008	0.884	ABC	0.886	0.114	0	0.886	ABC	0.838	0.162	0	0.838	ABC	0.891	0.096	0.013	0.891	ABC	0.894	0.106	0	0.894	ABC	0.907	0.093	0	0.907	ABC	0.907	0.093	0	0.907	ABC	0.861	0.136	0.003	0.861	ABC
121	GSM274995	ABC	male	72	0.21	1	ABC	0.808	ABC	0.907	0.089	0.003	0.907	ABC	0.911	0.089	0	0.911	ABC	0.842	0.152	0.006	0.842	ABC	0.912	0.088	0	0.912	ABC	0.907	0.086	0.008	0.907	ABC	0.914	0.086	0	0.914	ABC	0.917	0.083	0	0.917	ABC	0.916	0.084	0	0.916	ABC
175	GSM274948	ABC	female	59	0.31	1	ABC	0.804	ABC	0.853	0.14	0.008	0.853	ABC	0.861	0.139	0	0.861	ABC	0.885	0.115	0	0.885	ABC	0.648	0.327	0.025	0.648	ABC	0.577	0.398	0.025	0.577	ABC	0.594	0.379	0.028	0.594	ABC	0.66	0.33	0.01	0.66	ABC	0.701	0.293	0.006	0.701	ABC
130	GSM274902	ABC	male	62	10.14	0	ABC	0.799	ABC	0.829	0.153	0.018	0.829	ABC	0.618	0.356	0.026	0.618	ABC	0.753	0.238	0.009	0.753	ABC	0.681	0.256	0.064	0.681	ABC	0.537	0.393	0.07	0.537	TYPEIII	0.494	0.494	0.055	0.451	ABC	0.56	0.392	0.048	0.56	ABC	0.562	0.383	0.056	0.562	ABC
139	GSM275039	ABC	male	46	1.86	1	ABC	0.797	ABC	0.899	0.098	0.003	0.899	ABC	0.904	0.093	0.003	0.904	ABC	0.897	0.103	0	0.897	ABC	0.883	0.107	0.01	0.883	ABC	0.894	0.104	0.003	0.894	ABC	0.896	0.094	0.01	0.896	ABC	0.911	0.089	0	0.911	ABC	0.912	0.087	0	0.912	ABC
114	GSM274988	ABC	male	80	0.04	1	ABC	0.795	ABC	0.882	0.109	0.008	0.882	ABC	0.889	0.099	0.013	0.889	ABC	0.814	0.074	0.113	0.814	ABC	0.876	0.104	0.02	0.876	ABC	0.889	0.098	0.013	0.889	ABC	0.887	0.096	0.018	0.887	ABC	0.899	0.096	0.005	0.899	ABC	0.882	0.101	0.017	0.882	ABC
136	GSM275045	ABC	male	50	8.45	0	ABC	0.789	ABC	0.877	0.117	0.006	0.877	ABC	0.909	0.088	0.003	0.909	ABC	0.9	0.1	0	0.9	ABC	0.854	0.123	0.023	0.854	ABC	0.874	0.103	0.023	0.874	ABC	0.884	0.109	0.008	0.884	ABC	0.894	0.099	0.008	0.894	ABC	0.899	0.091	0.01	0.899	ABC
138	GSM274899	ABC	male	46	4.83	0	ABC	0.783	ABC	0.87	0.106	0.024	0.87	ABC	0.851	0.124	0.025	0.851	ABC	0.815	0.162	0.023	0.815	ABC	0.84	0.129	0.031	0.84	ABC	0.84	0.135	0.025	0.84	ABC	0.863	0.117	0.02	0.863	ABC	0.841	0.141	0.018	0.841	ABC	0.79	0.167	0.042	0.79	ABC
162	GSM275002	ABC	female	72	0.01	1	ABC	0.78	ABC	0.91	0.087	0.003	0.91	ABC	0.916	0.084	0	0.916	ABC	0.902	0.098	0	0.902	ABC	0.862	0.113	0.025	0.862	ABC	0.872	0.121	0.008	0.872	ABC	0.903	0.097	0	0.903	ABC	0.893	0.1	0.008	0.893	ABC	0.901	0.096	0.003	0.901	ABC
174	GSM274945	ABC	female	62	0.94	1	ABC	0.777	ABC	0.907	0.087	0.006	0.907	ABC	0.916	0.084	0	0.916	ABC	0.897	0.103	0	0.897	ABC	0.856	0.107	0.038	0.856	ABC	0.864	0.108	0.028	0.864	ABC	0.892	0.093	0.015	0.892	ABC	0.886	0.099	0.015	0.886	ABC	0.905	0.092	0.003	0.905	ABC
135	GSM274996	ABC	male	51	0.35	1	ABC	0.747	ABC	0.91	0.087	0.003	0.91	ABC	0.917	0.083	0	0.917	ABC	0.903	0.097	0	0.903	ABC	0.892	0.091	0.018	0.892	ABC	0.889	0.103	0.008	0.889	ABC	0.912	0.088	0	0.912	ABC	0.914	0.083	0.003	0.914	ABC	0.916	0.084	0	0.916	ABC
111	GSM274924	ABC	NA	54	1.31	1	ABC	0.741	ABC	0.891	0.103	0.006	0.891	ABC	0.901	0.099	0	0.901	ABC	0.878	0.119	0.003	0.878	ABC	0.572	0.134	0.294	0.572	ABC	0.609	0.111	0.28	0.609	ABC	0.618	0.102	0.28	0.618	ABC	0.606	0.114	0.28	0.606	ABC	0.854	0.139	0.007	0.854	ABC
176	GSM274998	ABC	female	59	4.11	0	ABC	0.73	ABC	0.767	0.209	0.024	0.767	ABC	0.667	0.309	0.024	0.667	ABC	0.844	0.146	0.01	0.844	ABC	0.836	0.118	0.045	0.836	ABC	0.847	0.126	0.028	0.847	ABC	0.816	0.162	0.023	0.816	ABC	0.761	0.194	0.045	0.761	ABC	0.517	0.203	0.28	0.517	ABC
124	GSM275031	ABC	male	69	3.26	1	ABC	0.728	ABC	0.906	0.088	0.006	0.906	ABC	0.915	0.085	0	0.915	ABC	0.891	0.109	0	0.891	ABC	0.877	0.108	0.015	0.877	ABC	0.884	0.106	0.01	0.884	ABC	0.888	0.102	0.01	0.888	ABC	0.899	0.096	0.005	0.899	ABC	0.894	0.098	0.008	0.894	ABC
144	GSM274999	ABC	male	41	6.08	1	ABC	0.726	ABC	0.753	0.169	0.078	0.753	GCB	0.555	0.324	0.555	0.121	GCB	0.425	0.256	0.425	0.319	TYPEIII	0.393	0.393	0.271	0.336	ABC	0.519	0.397	0.085	0.519	ABC	0.448	0.401	0.151	0.448	GCB	0.618	0.039	0.618	0.342	GCB	0.765	0.061	0.765	0.174	ABC
170	GSM275028	ABC	female	64	1	1	ABC	0.718	ABC	0.845	0.15	0.005	0.845	ABC	0.845	0.155	0	0.845	ABC	0.902	0.098	0	0.902	ABC	0.818	0.142	0.04	0.818	ABC	0.867	0.123	0.01	0.867	ABC	0.891	0.106	0.003	0.891	ABC	0.894	0.103	0.003	0.894	ABC	0.633	0.135	0.233	0.633	ABC
113	GSM274970	ABC	male	80	2.49	1	ABC	0.711	ABC	0.907	0.089	0.003	0.907	ABC	0.917	0.083	0	0.917	ABC	0.9	0.1	0	0.9	ABC	0.879	0.103	0.018	0.879	ABC	0.892	0.096	0.013	0.892	ABC	0.912	0.088	0	0.912	ABC	0.912	0.088	0	0.912	ABC	0.911	0.086	0.003	0.911	ABC
168	GSM275035	ABC	female	66	0.96	1	ABC	0.709	ABC	0.9	0.094	0.006	0.9	ABC	0.908	0.09	0.003	0.908	ABC	0.897	0.103	0	0.897	ABC	0.861	0.114	0.025	0.861	ABC	0.889	0.101	0.01	0.889	ABC	0.899	0.099	0.003	0.899	ABC	0.911	0.089	0	0.911	ABC	0.909	0.091	0	0.909	ABC
108	GSM274915	ABC	NA	80	0.28	1	ABC	0.683	ABC	0.873	0.12	0.008	0.873	ABC	0.863	0.127	0.01	0.863	ABC	0.81	0.182	0.008	0.81	ABC	0.778	0.157	0.065	0.778	ABC	0.805	0.137	0.058	0.805	ABC	0.774	0.18	0.045	0.774	ABC	0.615	0.355	0.03	0.615	ABC	0.658	0.342	0	0.658	ABC
129	GSM274954	ABC	male	64	0.38	1	ABC	0.678	ABC	0.897	0.094	0.008	0.897	ABC	0.917	0.083	0	0.917	ABC	0.897	0.103	0	0.897	ABC	0.895	0.095	0.01	0.895	ABC	0.904	0.091	0.005	0.904	ABC	0.909	0.088	0.003	0.909	ABC	0.914	0.086	0	0.914	ABC	0.907	0.09	0.003	0.907	ABC
161	GSM274964	ABC	female	72	0.99	1	ABC	0.656	ABC	0.897	0.097	0.006	0.897	ABC	0.905	0.095	0	0.905	ABC	0.888	0.112	0	0.888	ABC	0.88	0.11	0.01	0.88	ABC	0.894	0.098	0.008	0.894	ABC	0.897	0.101	0.003	0.897	ABC	0.904	0.096	0	0.904	ABC	0.885	0.115	0.001	0.885	ABC
88	GSM275050	TypeIII	male	61	9.16	0	ABC	0.649	TYPEIII	0.46	0.46	0.081	0.459	TYPEIII	0.579	0.579	0.135	0.286	TYPEIII	0.524	0.524	0.469	0.007	ABC	0.342	0.327	0.332	0.342	TYPEIII	0.406	0.406	0.319	0.275	ABC	0.461	0.238	0.301	0.461	ABC	0.635	0.277	0.088	0.635	ABC	0.499	0.288	0.213	0.499	TYPEIII
131	GSM274934	ABC	male	60	2.26	1	ABC	0.645	ABC	0.581	0.398	0.02	0.581	ABC	0.539	0.442	0.019	0.539	TYPEIII	0.631	0.631	0.028	0.341	ABC	0.545	0.435	0.02	0.545	ABC	0.586	0.144	0.27	0.586	ABC	0.593	0.147	0.26	0.593	ABC	0.603	0.394	0.003	0.603	ABC	0.595	0.401	0.004	0.595	ABC
143	GSM274923	ABC	male	41	0.71	1	ABC	0.629	ABC	0.861	0.128	0.011	0.861	ABC	0.847	0.149	0.004	0.847	ABC	0.853	0.146	0.001	0.853	ABC	0.868	0.122	0.01	0.868	ABC	0.884	0.108	0.008	0.884	ABC	0.884	0.111	0.005	0.884	ABC	0.848	0.151	0	0.848	ABC	0.866	0.123	0.011	0.866	ABC
91	GSM275056	TypeIII	male	58	0.62	1	ABC	0.626	ABC	0.753	0.054	0.193	0.753	GCB	0.44	0.142	0.44	0.418	GCB	0.514	0.023	0.514	0.463	TYPEIII	0.52	0.52	0.301	0.18	TYPEIII	0.627	0.627	0.167	0.206	TYPEIII	0.61	0.61	0.263	0.127	GCB	0.584	0.355	0.584	0.061	GCB	0.871	0.116	0.871	0.013	TYPEIII
134	GSM274983	ABC	male	54	1.03	1	ABC	0.623	ABC	0.85	0.121	0.029	0.85	ABC	0.902	0.095	0.003	0.902	ABC	0.881	0.107	0.013	0.881	ABC	0.864	0.121	0.015	0.864	ABC	0.879	0.108	0.013	0.879	ABC	0.892	0.101	0.008	0.892	ABC	0.898	0.102	0	0.898	ABC	0.895	0.105	0.001	0.895	ABC
152	GSM275036	ABC	female	81	7.62	0	ABC	0.622	ABC	0.639	0.351	0.01	0.639	ABC	0.636	0.354	0.01	0.636	ABC	0.587	0.392	0.02	0.587	ABC	0.633	0.347	0.02	0.633	ABC	0.642	0.348	0.01	0.642	ABC	0.634	0.108	0.258	0.634	ABC	0.805	0.192	0.003	0.805	ABC	0.797	0.2	0.003	0.797	ABC
160	GSM274950	ABC	female	75	0.51	1	ABC	0.613	ABC	0.596	0.388	0.015	0.596	ABC	0.623	0.371	0.006	0.623	ABC	0.895	0.105	0	0.895	ABC	0.826	0.127	0.048	0.826	ABC	0.852	0.106	0.043	0.852	ABC	0.866	0.113	0.02	0.866	ABC	0.914	0.086	0	0.914	ABC	0.913	0.086	0.001	0.913	ABC
127	GSM275021	ABC	male	67	2	1	ABC	0.602	ABC	0.839	0.15	0.011	0.839	ABC	0.773	0.222	0.005	0.773	ABC	0.852	0.142	0.006	0.852	ABC	0.79	0.165	0.045	0.79	ABC	0.726	0.241	0.033	0.726	ABC	0.87	0.11	0.02	0.87	ABC	0.853	0.134	0.013	0.853	ABC	0.886	0.112	0.001	0.886	ABC
158	GSM275013	ABC	female	76	0.34	1	ABC	0.597	ABC	0.866	0.134	0	0.866	ABC	0.88	0.12	0	0.88	ABC	0.872	0.125	0.003	0.872	ABC	0.831	0.131	0.038	0.831	ABC	0.822	0.133	0.045	0.822	ABC	0.842	0.136	0.023	0.842	ABC	0.669	0.324	0.008	0.669	ABC	0.666	0.334	0	0.666	ABC
153	GSM275037	ABC	female	81	6.8	1	ABC	0.592	ABC	0.705	0.274	0.021	0.705	ABC	0.774	0.224	0.003	0.774	ABC	0.798	0.199	0.003	0.798	ABC	0.805	0.167	0.028	0.805	ABC	0.829	0.156	0.015	0.829	ABC	0.778	0.217	0.005	0.778	ABC	0.831	0.169	0	0.831	ABC	0.842	0.155	0.003	0.842	ABC
110	GSM274938	ABC	NA	72	0.82	0	ABC	0.567	ABC	0.851	0.123	0.026	0.851	ABC	0.901	0.091	0.008	0.901	ABC	0.858	0.14	0.003	0.858	ABC	0.823	0.134	0.043	0.823	ABC	0.864	0.118	0.018	0.864	ABC	0.874	0.106	0.02	0.874	ABC	0.891	0.091	0.018	0.891	ABC	0.899	0.09	0.011	0.899	ABC
146	GSM274941	ABC	male	39	0.62	1	ABC	0.565	TYPEIII	0.509	0.509	0.097	0.394	TYPEIII	0.609	0.609	0.034	0.357	TYPEIII	0.656	0.656	0.051	0.292	ABC	0.441	0.394	0.165	0.441	ABC	0.484	0.145	0.37	0.484	TYPEIII	0.438	0.438	0.208	0.354	GCB	0.427	0.227	0.427	0.345	GCB	0.379	0.32	0.379	0.301	ABC
142	GSM274942	ABC	male	42	6.44	0	ABC	0.552	ABC	0.865	0.119	0.016	0.865	ABC	0.916	0.084	0	0.916	ABC	0.897	0.103	0	0.897	ABC	0.863	0.117	0.02	0.863	ABC	0.879	0.106	0.015	0.879	ABC	0.872	0.108	0.02	0.872	ABC	0.896	0.094	0.01	0.896	ABC	0.876	0.113	0.011	0.876	ABC
163	GSM275015	ABC	female	72	2.45	1	ABC	0.545	ABC	0.73	0.252	0.018	0.73	ABC	0.884	0.111	0.005	0.884	ABC	0.895	0.105	0	0.895	ABC	0.756	0.156	0.088	0.756	ABC	0.705	0.225	0.07	0.705	ABC	0.722	0.212	0.065	0.722	TYPEIII	0.663	0.663	0.068	0.269	ABC	0.496	0.484	0.02	0.496	ABC
116	GSM274920	ABC	male	77	6.64	1	ABC	0.526	ABC	0.887	0.109	0.003	0.887	ABC	0.89	0.107	0.003	0.89	ABC	0.897	0.103	0	0.897	ABC	0.868	0.099	0.033	0.868	ABC	0.867	0.111	0.023	0.867	ABC	0.886	0.099	0.015	0.886	ABC	0.884	0.096	0.02	0.884	ABC	0.913	0.087	0	0.913	ABC
78	GSM275059	TypeIII	NA	66	7.42	0	ABC	0.525	GCB	0.541	0.071	0.541	0.387	GCB	0.708	0.103	0.708	0.189	GCB	0.73	0.098	0.73	0.172	ABC	0.523	0.419	0.058	0.523	ABC	0.579	0.386	0.035	0.579	ABC	0.541	0.423	0.035	0.541	ABC	0.508	0.461	0.031	0.508	TYPEIII	0.487	0.487	0.05	0.463	ABC
169	GSM274917	ABC	female	65	5.57	1	ABC	0.509	ABC	0.887	0.104	0.008	0.887	ABC	0.869	0.123	0.008	0.869	ABC	0.857	0.143	0	0.857	ABC	0.885	0.1	0.015	0.885	ABC	0.897	0.091	0.013	0.897	ABC	0.901	0.094	0.005	0.901	ABC	0.902	0.095	0.003	0.902	ABC	0.89	0.105	0.005	0.89	ABC
167	GSM275003	ABC	female	66	0.33	1	ABC	0.499	ABC	0.794	0.174	0.032	0.794	ABC	0.84	0.14	0.02	0.84	ABC	0.881	0.114	0.005	0.881	GCB	0.576	0.052	0.576	0.372	ABC	0.498	0.129	0.373	0.498	ABC	0.525	0.108	0.366	0.525	GCB	0.693	0.135	0.693	0.172	GCB	0.547	0.232	0.547	0.221	ABC
140	GSM274979	ABC	male	45	2.02	0	ABC	0.473	ABC	0.902	0.095	0.003	0.902	ABC	0.914	0.086	0	0.914	ABC	0.892	0.108	0	0.892	ABC	0.878	0.106	0.015	0.878	ABC	0.862	0.118	0.02	0.862	ABC	0.899	0.099	0.003	0.899	ABC	0.911	0.089	0	0.911	ABC	0.91	0.088	0.001	0.91	ABC
171	GSM275029	ABC	female	64	0.47	1	ABC	0.469	ABC	0.596	0.328	0.076	0.596	TYPEIII	0.484	0.484	0.076	0.44	ABC	0.512	0.469	0.019	0.512	ABC	0.684	0.246	0.07	0.684	ABC	0.776	0.144	0.08	0.776	ABC	0.503	0.404	0.094	0.503	ABC	0.698	0.223	0.078	0.698	ABC	0.692	0.237	0.071	0.692	ABC
102	GSM275063	TypeIII	female	65	0.37	1	ABC	0.443	TYPEIII	0.525	0.525	0.037	0.438	TYPEIII	0.748	0.748	0.039	0.213	TYPEIII	0.601	0.601	0.035	0.364	ABC	0.478	0.144	0.378	0.478	ABC	0.542	0.14	0.319	0.542	ABC	0.477	0.205	0.318	0.477	TYPEIII	0.501	0.501	0.136	0.363	TYPEIII	0.66	0.66	0.118	0.222	GCB
126	GSM274984	ABC	male	67	5.4	1	ABC	0.398	ABC	0.836	0.133	0.031	0.836	ABC	0.797	0.179	0.023	0.797	ABC	0.753	0.202	0.045	0.753	ABC	0.857	0.122	0.021	0.857	ABC	0.874	0.113	0.013	0.874	ABC	0.86	0.124	0.015	0.86	ABC	0.829	0.171	0	0.829	ABC	0.791	0.198	0.011	0.791	ABC
75	GSM274910	GCB	female	39	8.86	0	GCB	0.914	GCB	0.894	0.099	0.894	0.008	GCB	0.872	0.103	0.872	0.025	GCB	0.896	0.094	0.896	0.01	GCB	0.879	0.098	0.879	0.023	GCB	0.894	0.093	0.894	0.013	GCB	0.898	0.095	0.898	0.008	GCB	0.905	0.092	0.905	0.003	GCB	0.909	0.091	0.909	0	GCB
39	GSM274965	GCB	male	47	5.65	0	GCB	0.914	GCB	0.914	0.086	0.914	0	GCB	0.907	0.09	0.907	0.003	GCB	0.91	0.085	0.91	0.005	GCB	0.882	0.096	0.882	0.023	GCB	0.897	0.096	0.897	0.008	GCB	0.903	0.09	0.903	0.008	GCB	0.903	0.092	0.903	0.005	GCB	0.909	0.091	0.909	0	GCB
4	GSM274903	GCB	NA	70	1.33	1	GCB	0.911	GCB	0.896	0.102	0.896	0.003	GCB	0.853	0.132	0.853	0.015	GCB	0.85	0.138	0.85	0.013	GCB	0.883	0.114	0.883	0.003	GCB	0.909	0.091	0.909	0	GCB	0.893	0.1	0.893	0.008	GCB	0.9	0.1	0.9	0	GCB	0.896	0.104	0.896	0	GCB
69	GSM274909	GCB	female	56	14.24	0	GCB	0.91	GCB	0.916	0.084	0.916	0	GCB	0.916	0.084	0.916	0	GCB	0.915	0.085	0.915	0	GCB	0.892	0.098	0.892	0.01	GCB	0.907	0.091	0.907	0.003	GCB	0.895	0.103	0.895	0.003	GCB	0.907	0.093	0.907	0	GCB	0.909	0.091	0.909	0	GCB
42	GSM274977	GCB	male	44	21.78	0	GCB	0.91	GCB	0.89	0.092	0.89	0.018	GCB	0.877	0.103	0.877	0.02	GCB	0.907	0.088	0.907	0.005	GCB	0.871	0.101	0.871	0.028	GCB	0.889	0.096	0.889	0.015	GCB	0.879	0.096	0.879	0.025	GCB	0.881	0.096	0.881	0.023	GCB	0.592	0.102	0.592	0.307	GCB
27	GSM274916	GCB	male	62	14.59	0	GCB	0.909	GCB	0.916	0.084	0.916	0	GCB	0.917	0.083	0.917	0	GCB	0.917	0.083	0.917	0	GCB	0.897	0.091	0.897	0.013	GCB	0.904	0.091	0.904	0.005	GCB	0.9	0.095	0.9	0.005	GCB	0.903	0.097	0.903	0	GCB	0.906	0.094	0.906	0	GCB
54	GSM275040	GCB	female	75	2.76	1	GCB	0.909	GCB	0.912	0.085	0.912	0.003	GCB	0.909	0.091	0.909	0	GCB	0.913	0.084	0.913	0.003	GCB	0.882	0.105	0.882	0.013	GCB	0.899	0.099	0.899	0.003	GCB	0.886	0.106	0.886	0.008	GCB	0.892	0.1	0.892	0.008	GCB	0.904	0.094	0.904	0.003	GCB
22	GSM274937	GCB	male	67	6.46	0	GCB	0.908	GCB	0.917	0.083	0.917	0	GCB	0.916	0.084	0.916	0	GCB	0.916	0.084	0.916	0	GCB	0.904	0.088	0.904	0.008	GCB	0.914	0.086	0.914	0	GCB	0.913	0.087	0.913	0	GCB	0.913	0.087	0.913	0	GCB	0.911	0.089	0.911	0	GCB
47	GSM274982	GCB	female	88	3.88	0	GCB	0.908	GCB	0.913	0.087	0.913	0	GCB	0.911	0.089	0.911	0	GCB	0.905	0.095	0.905	0	GCB	0.912	0.086	0.912	0.003	GCB	0.894	0.106	0.894	0	GCB	0.906	0.094	0.906	0	GCB	0.911	0.089	0.911	0	GCB	0.912	0.088	0.912	0	GCB
76	GSM275008	GCB	female	34	1.45	1	GCB	0.907	GCB	0.912	0.088	0.912	0	GCB	0.917	0.083	0.917	0	GCB	0.916	0.084	0.916	0	GCB	0.902	0.096	0.902	0.003	GCB	0.914	0.086	0.914	0	GCB	0.91	0.087	0.91	0.003	GCB	0.913	0.087	0.913	0	GCB	0.911	0.089	0.911	0	GCB
33	GSM274918	GCB	male	55	6.94	1	GCB	0.906	GCB	0.917	0.083	0.917	0	GCB	0.917	0.083	0.917	0	GCB	0.914	0.084	0.914	0.003	GCB	0.897	0.101	0.897	0.003	GCB	0.914	0.086	0.914	0	GCB	0.913	0.087	0.913	0	GCB	0.913	0.087	0.913	0	GCB	0.913	0.087	0.913	0	GCB
56	GSM274947	GCB	female	72	3.03	1	GCB	0.906	GCB	0.89	0.11	0.89	0	GCB	0.914	0.086	0.914	0	GCB	0.884	0.116	0.884	0	GCB	0.902	0.093	0.902	0.005	GCB	0.899	0.088	0.899	0.013	GCB	0.908	0.09	0.908	0.003	GCB	0.905	0.095	0.905	0	GCB	0.905	0.095	0.905	0	GCB
43	GSM274930	GCB	male	42	11.17	0	GCB	0.905	GCB	0.864	0.126	0.864	0.01	GCB	0.909	0.091	0.909	0	GCB	0.888	0.112	0.888	0	GCB	0.889	0.103	0.889	0.008	GCB	0.899	0.093	0.899	0.008	GCB	0.893	0.095	0.893	0.013	GCB	0.895	0.097	0.895	0.008	GCB	0.902	0.093	0.902	0.005	GCB
32	GSM274986	GCB	male	56	10.18	0	GCB	0.904	GCB	0.903	0.097	0.903	0	GCB	0.894	0.106	0.894	0	GCB	0.894	0.105	0.894	0	GCB	0.881	0.111	0.881	0.008	GCB	0.899	0.096	0.899	0.005	GCB	0.897	0.101	0.897	0.003	GCB	0.909	0.091	0.909	0	GCB	0.857	0.141	0.857	0.002	GCB
1	GSM274940	GCB	NA	87	4.99	1	GCB	0.903	GCB	0.916	0.084	0.916	0	GCB	0.911	0.086	0.911	0.003	GCB	0.916	0.084	0.916	0	GCB	0.894	0.103	0.894	0.003	GCB	0.912	0.086	0.912	0.003	GCB	0.91	0.09	0.91	0	GCB	0.91	0.09	0.91	0	GCB	0.908	0.092	0.908	0	GCB
67	GSM275046	GCB	female	59	9.68	0	GCB	0.903	GCB	0.914	0.086	0.914	0	GCB	0.916	0.084	0.916	0	GCB	0.916	0.084	0.916	0	GCB	0.907	0.086	0.907	0.008	GCB	0.914	0.086	0.914	0	GCB	0.913	0.087	0.913	0	GCB	0.91	0.09	0.91	0	GCB	0.909	0.091	0.909	0	GCB
26	GSM274949	GCB	male	64	0.12	1	GCB	0.901	GCB	0.903	0.095	0.903	0.003	GCB	0.911	0.089	0.911	0	GCB	0.901	0.099	0.901	0	GCB	0.886	0.101	0.886	0.013	GCB	0.884	0.103	0.884	0.013	GCB	0.899	0.096	0.899	0.005	GCB	0.904	0.094	0.904	0.003	GCB	0.893	0.107	0.893	0	GCB
61	GSM275016	GCB	female	66	0.12	1	GCB	0.901	GCB	0.914	0.086	0.914	0	GCB	0.914	0.086	0.914	0	GCB	0.914	0.083	0.914	0.003	GCB	0.882	0.108	0.882	0.01	GCB	0.894	0.096	0.894	0.01	GCB	0.89	0.095	0.89	0.015	GCB	0.905	0.092	0.905	0.003	GCB	0.912	0.088	0.912	0	GCB
44	GSM274956	GCB	male	35	8.15	0	GCB	0.9	GCB	0.871	0.121	0.871	0.008	GCB	0.896	0.094	0.896	0.01	GCB	0.895	0.095	0.895	0.01	GCB	0.891	0.091	0.891	0.018	GCB	0.904	0.091	0.904	0.005	GCB	0.908	0.09	0.908	0.003	GCB	0.913	0.087	0.913	0	GCB	0.909	0.091	0.909	0	GCB
49	GSM274911	GCB	female	81	3.93	1	GCB	0.899	GCB	0.897	0.103	0.897	0	GCB	0.899	0.096	0.899	0.005	GCB	0.913	0.087	0.913	0	GCB	0.846	0.134	0.846	0.02	GCB	0.878	0.112	0.878	0.01	GCB	0.877	0.11	0.877	0.013	GCB	0.888	0.112	0.888	0	GCB	0.887	0.112	0.887	0.001	GCB
2	GSM274966	GCB	NA	81	2.43	0	GCB	0.897	GCB	0.868	0.119	0.868	0.013	GCB	0.905	0.095	0.905	0	GCB	0.892	0.106	0.892	0.003	GCB	0.848	0.127	0.848	0.025	GCB	0.872	0.101	0.872	0.028	GCB	0.863	0.122	0.863	0.015	GCB	0.882	0.108	0.882	0.01	GCB	0.899	0.093	0.899	0.008	GCB
10	GSM274987	GCB	NA	30	10.4	0	GCB	0.897	GCB	0.914	0.086	0.914	0	GCB	0.911	0.084	0.911	0.005	GCB	0.916	0.084	0.916	0	GCB	0.903	0.089	0.903	0.008	GCB	0.909	0.088	0.909	0.003	GCB	0.905	0.095	0.905	0	GCB	0.91	0.09	0.91	0	GCB	0.909	0.09	0.909	0	GCB
107	GSM275054	TypeIII	female	46	4.94	0	GCB	0.897	GCB	0.812	0.137	0.812	0.051	GCB	0.606	0.103	0.606	0.291	GCB	0.601	0.098	0.601	0.301	GCB	0.798	0.143	0.798	0.059	GCB	0.811	0.128	0.811	0.061	GCB	0.805	0.152	0.805	0.043	GCB	0.784	0.176	0.784	0.04	GCB	0.867	0.123	0.867	0.011	GCB
11	GSM274925	GCB	male	85	5.38	1	GCB	0.896	GCB	0.82	0.161	0.82	0.019	GCB	0.584	0.112	0.584	0.303	GCB	0.616	0.096	0.616	0.288	GCB	0.77	0.145	0.77	0.085	GCB	0.752	0.178	0.752	0.07	GCB	0.814	0.14	0.814	0.045	GCB	0.812	0.171	0.812	0.018	GCB	0.777	0.179	0.777	0.045	GCB
37	GSM274932	GCB	male	49	2.05	1	GCB	0.896	GCB	0.845	0.127	0.845	0.028	GCB	0.885	0.102	0.885	0.013	GCB	0.896	0.096	0.896	0.008	GCB	0.865	0.12	0.865	0.015	GCB	0.886	0.104	0.886	0.01	GCB	0.886	0.111	0.886	0.003	GCB	0.887	0.105	0.887	0.008	GCB	0.892	0.107	0.892	0.001	GCB
71	GSM274922	GCB	female	54	0.23	1	GCB	0.895	GCB	0.889	0.106	0.889	0.005	GCB	0.908	0.092	0.908	0	GCB	0.891	0.109	0.891	0	GCB	0.889	0.104	0.889	0.008	GCB	0.907	0.088	0.907	0.005	GCB	0.905	0.092	0.905	0.003	GCB	0.902	0.095	0.902	0.003	GCB	0.895	0.105	0.895	0.001	GCB
25	GSM274943	GCB	male	64	7.11	0	GCB	0.895	GCB	0.79	0.186	0.79	0.024	GCB	0.794	0.191	0.794	0.015	GCB	0.834	0.155	0.834	0.011	GCB	0.826	0.12	0.826	0.054	GCB	0.855	0.108	0.855	0.038	GCB	0.829	0.145	0.829	0.026	GCB	0.88	0.114	0.88	0.005	GCB	0.808	0.179	0.808	0.013	GCB
18	GSM274906	GCB	male	72	4.09	0	GCB	0.892	GCB	0.777	0.201	0.777	0.023	GCB	0.807	0.177	0.807	0.016	GCB	0.821	0.165	0.821	0.014	GCB	0.712	0.211	0.712	0.077	GCB	0.668	0.277	0.668	0.055	GCB	0.585	0.365	0.585	0.05	GCB	0.625	0.169	0.625	0.206	GCB	0.771	0.161	0.771	0.068	GCB
73	GSM274969	GCB	female	50	8.76	0	GCB	0.892	GCB	0.907	0.093	0.907	0	GCB	0.911	0.086	0.911	0.003	GCB	0.916	0.084	0.916	0	GCB	0.892	0.096	0.892	0.013	GCB	0.904	0.091	0.904	0.005	GCB	0.9	0.092	0.9	0.008	GCB	0.903	0.097	0.903	0	GCB	0.894	0.103	0.894	0.003	GCB
50	GSM275006	GCB	female	80	4.16	0	GCB	0.892	GCB	0.908	0.092	0.908	0	GCB	0.889	0.111	0.889	0	GCB	0.883	0.114	0.883	0.003	GCB	0.874	0.119	0.874	0.008	GCB	0.864	0.121	0.864	0.015	GCB	0.629	0.366	0.629	0.005	GCB	0.894	0.099	0.894	0.008	GCB	0.864	0.13	0.864	0.005	GCB
5	GSM275019	GCB	NA	70	0.42	1	GCB	0.888	TYPEIII	0.474	0.474	0.437	0.09	GCB	0.509	0.442	0.509	0.049	GCB	0.392	0.367	0.392	0.241	GCB	0.779	0.148	0.779	0.073	GCB	0.775	0.143	0.775	0.083	GCB	0.79	0.15	0.79	0.06	GCB	0.775	0.05	0.775	0.175	GCB	0.4	0.209	0.4	0.391	GCB
38	GSM274907	GCB	male	47	9.11	1	GCB	0.887	GCB	0.914	0.086	0.914	0	GCB	0.917	0.083	0.917	0	GCB	0.917	0.083	0.917	0	GCB	0.909	0.091	0.909	0	GCB	0.917	0.083	0.917	0	GCB	0.908	0.09	0.908	0.003	GCB	0.91	0.087	0.91	0.003	GCB	0.912	0.088	0.912	0	GCB
92	GSM275060	TypeIII	male	56	1.92	1	GCB	0.887	GCB	0.784	0.17	0.784	0.045	GCB	0.502	0.439	0.502	0.059	TYPEIII	0.428	0.428	0.38	0.192	GCB	0.538	0.157	0.538	0.306	GCB	0.495	0.202	0.495	0.303	GCB	0.545	0.165	0.545	0.29	GCB	0.509	0.382	0.509	0.109	GCB	0.493	0.451	0.493	0.055	GCB
74	GSM274961	GCB	female	49	8.36	0	GCB	0.886	GCB	0.794	0.177	0.794	0.029	GCB	0.865	0.11	0.865	0.025	GCB	0.873	0.107	0.873	0.02	GCB	0.83	0.123	0.83	0.048	GCB	0.713	0.25	0.713	0.038	GCB	0.784	0.193	0.784	0.023	GCB	0.73	0.232	0.73	0.038	GCB	0.804	0.169	0.804	0.027	GCB
52	GSM274928	GCB	female	76	10.53	0	GCB	0.885	GCB	0.914	0.086	0.914	0	GCB	0.914	0.083	0.914	0.003	GCB	0.914	0.084	0.914	0.003	GCB	0.901	0.092	0.901	0.008	GCB	0.907	0.091	0.907	0.003	GCB	0.903	0.09	0.903	0.008	GCB	0.91	0.09	0.91	0	GCB	0.904	0.095	0.904	0.001	GCB
19	GSM274912	GCB	male	72	0.15	1	GCB	0.884	GCB	0.917	0.083	0.917	0	GCB	0.917	0.083	0.917	0	GCB	0.916	0.084	0.916	0	GCB	0.892	0.098	0.892	0.01	GCB	0.907	0.093	0.907	0	GCB	0.905	0.092	0.905	0.003	GCB	0.913	0.087	0.913	0	GCB	0.913	0.087	0.913	0	GCB
24	GSM275005	GCB	male	65	9.47	0	GCB	0.881	GCB	0.908	0.09	0.908	0.003	GCB	0.906	0.094	0.906	0	GCB	0.915	0.085	0.915	0	GCB	0.886	0.099	0.886	0.015	GCB	0.904	0.093	0.904	0.003	GCB	0.907	0.093	0.907	0	GCB	0.891	0.109	0.891	0	GCB	0.885	0.11	0.885	0.005	GCB
48	GSM274908	GCB	female	84	0.33	1	GCB	0.879	GCB	0.912	0.088	0.912	0	GCB	0.917	0.083	0.917	0	GCB	0.916	0.084	0.916	0	GCB	0.884	0.111	0.884	0.005	GCB	0.914	0.083	0.914	0.003	GCB	0.913	0.087	0.913	0	GCB	0.913	0.087	0.913	0	GCB	0.912	0.088	0.912	0	GCB
58	GSM275020	GCB	female	71	6.45	0	GCB	0.879	GCB	0.917	0.083	0.917	0	GCB	0.917	0.083	0.917	0	GCB	0.915	0.085	0.915	0	GCB	0.878	0.119	0.878	0.003	GCB	0.894	0.098	0.894	0.008	GCB	0.883	0.102	0.883	0.015	GCB	0.893	0.107	0.893	0	GCB	0.903	0.093	0.903	0.004	GCB
23	GSM274904	GCB	male	66	15.41	0	GCB	0.873	GCB	0.86	0.112	0.86	0.028	GCB	0.903	0.096	0.903	0	GCB	0.91	0.088	0.91	0.003	GCB	0.836	0.121	0.836	0.043	GCB	0.849	0.113	0.849	0.038	GCB	0.869	0.098	0.869	0.033	GCB	0.869	0.098	0.869	0.033	GCB	0.811	0.138	0.811	0.051	GCB
7	GSM274951	GCB	NA	67	12.12	0	GCB	0.872	GCB	0.655	0.34	0.655	0.005	GCB	0.88	0.12	0.88	0	GCB	0.77	0.227	0.77	0.003	GCB	0.827	0.149	0.827	0.024	GCB	0.847	0.123	0.847	0.03	GCB	0.602	0.373	0.602	0.025	GCB	0.849	0.148	0.849	0.003	GCB	0.82	0.165	0.82	0.016	GCB
57	GSM274976	GCB	female	71	3.47	0	GCB	0.872	GCB	0.899	0.101	0.899	0	GCB	0.914	0.086	0.914	0	GCB	0.901	0.099	0.901	0	GCB	0.836	0.152	0.836	0.013	GCB	0.884	0.113	0.884	0.003	GCB	0.639	0.359	0.639	0.003	GCB	0.912	0.088	0.912	0	GCB	0.911	0.089	0.911	0	GCB
21	GSM275007	GCB	male	69	9.7	0	GCB	0.872	GCB	0.914	0.086	0.914	0	GCB	0.914	0.086	0.914	0	GCB	0.915	0.085	0.915	0	GCB	0.851	0.107	0.851	0.043	GCB	0.876	0.094	0.876	0.03	GCB	0.88	0.107	0.88	0.013	GCB	0.908	0.09	0.908	0.003	GCB	0.911	0.089	0.911	0	GCB
34	GSM274936	GCB	male	54	5.77	0	GCB	0.868	GCB	0.911	0.089	0.911	0	GCB	0.913	0.084	0.913	0.003	GCB	0.916	0.084	0.916	0	GCB	0.911	0.089	0.911	0	GCB	0.909	0.088	0.909	0.003	GCB	0.913	0.087	0.913	0	GCB	0.913	0.087	0.913	0	GCB	0.91	0.09	0.91	0	GCB
15	GSM274896	GCB	male	75	0.82	1	GCB	0.866	GCB	0.909	0.091	0.909	0	GCB	0.914	0.084	0.914	0.003	GCB	0.916	0.084	0.916	0	GCB	0.839	0.129	0.839	0.033	GCB	0.865	0.107	0.865	0.028	GCB	0.86	0.115	0.86	0.025	GCB	0.898	0.097	0.898	0.005	GCB	0.876	0.116	0.876	0.009	GCB
29	GSM274931	GCB	male	60	11.29	0	GCB	0.866	GCB	0.911	0.089	0.911	0	GCB	0.916	0.084	0.916	0	GCB	0.916	0.084	0.916	0	GCB	0.874	0.109	0.874	0.018	GCB	0.912	0.088	0.912	0	GCB	0.895	0.095	0.895	0.01	GCB	0.913	0.087	0.913	0	GCB	0.911	0.089	0.911	0	GCB
53	GSM274944	GCB	female	75	6.78	0	GCB	0.866	GCB	0.61	0.387	0.61	0.003	GCB	0.758	0.238	0.758	0.004	GCB	0.791	0.113	0.791	0.096	GCB	0.682	0.264	0.682	0.054	GCB	0.783	0.162	0.783	0.055	GCB	0.778	0.174	0.778	0.048	GCB	0.792	0.175	0.792	0.033	GCB	0.781	0.187	0.781	0.033	GCB
84	GSM275069	TypeIII	male	79	0.6	1	GCB	0.865	TYPEIII	0.668	0.668	0.198	0.133	TYPEIII	0.771	0.771	0.08	0.149	TYPEIII	0.636	0.636	0.102	0.262	ABC	0.412	0.208	0.38	0.412	ABC	0.614	0.048	0.337	0.614	GCB	0.494	0.18	0.494	0.326	TYPEIII	0.564	0.564	0.392	0.044	TYPEIII	0.63	0.63	0.295	0.075	GCB
46	GSM274993	GCB	male	32	4.01	0	GCB	0.86	GCB	0.827	0.131	0.827	0.043	GCB	0.519	0.415	0.519	0.066	ABC	0.765	0.052	0.183	0.765	GCB	0.856	0.119	0.856	0.025	GCB	0.884	0.103	0.884	0.013	GCB	0.872	0.111	0.872	0.018	GCB	0.874	0.101	0.874	0.025	GCB	0.855	0.122	0.855	0.023	GCB
14	GSM274971	GCB	male	76	1.27	1	GCB	0.854	GCB	0.899	0.099	0.899	0.003	GCB	0.909	0.091	0.909	0	GCB	0.895	0.105	0.895	0	GCB	0.791	0.174	0.791	0.035	GCB	0.862	0.101	0.862	0.038	GCB	0.859	0.118	0.859	0.023	GCB	0.811	0.163	0.811	0.027	GCB	0.769	0.183	0.769	0.048	GCB
36	GSM275009	GCB	male	50	6.65	0	GCB	0.853	GCB	0.493	0.414	0.493	0.094	GCB	0.803	0.133	0.803	0.063	GCB	0.779	0.034	0.779	0.187	GCB	0.363	0.29	0.363	0.347	TYPEIII	0.364	0.364	0.311	0.325	GCB	0.453	0.217	0.453	0.329	GCB	0.565	0.146	0.565	0.288	GCB	0.75	0.201	0.75	0.049	TYPEIII
66	GSM275033	GCB	female	60	3.32	0	GCB	0.853	GCB	0.914	0.086	0.914	0	GCB	0.916	0.084	0.916	0	GCB	0.916	0.084	0.916	0	GCB	0.86	0.128	0.86	0.013	GCB	0.894	0.103	0.894	0.003	GCB	0.9	0.097	0.9	0.003	GCB	0.912	0.088	0.912	0	GCB	0.908	0.092	0.908	0	GCB
63	GSM274946	GCB	female	61	11.72	0	GCB	0.847	GCB	0.859	0.138	0.859	0.003	GCB	0.807	0.193	0.807	0	GCB	0.648	0.352	0.648	0	GCB	0.826	0.128	0.826	0.046	GCB	0.85	0.117	0.85	0.033	GCB	0.863	0.114	0.863	0.023	GCB	0.865	0.107	0.865	0.028	GCB	0.77	0.187	0.77	0.043	GCB
9	GSM274990	GCB	NA	44	5.53	0	GCB	0.846	GCB	0.904	0.096	0.904	0	GCB	0.915	0.085	0.915	0	GCB	0.915	0.085	0.915	0	GCB	0.883	0.102	0.883	0.015	GCB	0.884	0.108	0.884	0.008	GCB	0.893	0.1	0.893	0.008	GCB	0.899	0.101	0.899	0	GCB	0.901	0.098	0.901	0.001	GCB
31	GSM274939	GCB	male	58	1.06	1	GCB	0.842	GCB	0.883	0.107	0.883	0.01	GCB	0.879	0.113	0.879	0.008	GCB	0.878	0.112	0.878	0.01	GCB	0.868	0.112	0.868	0.02	GCB	0.897	0.093	0.897	0.01	GCB	0.905	0.095	0.905	0	GCB	0.905	0.092	0.905	0.003	GCB	0.897	0.1	0.897	0.003	GCB
35	GSM274895	GCB	male	52	2.68	1	GCB	0.839	GCB	0.89	0.11	0.89	0	GCB	0.911	0.086	0.911	0.003	GCB	0.91	0.09	0.91	0	GCB	0.758	0.184	0.758	0.058	GCB	0.858	0.129	0.858	0.013	GCB	0.842	0.13	0.842	0.028	GCB	0.858	0.129	0.858	0.013	GCB	0.791	0.165	0.791	0.044	GCB
3	GSM274989	GCB	NA	73	1.1	1	GCB	0.83	GCB	0.853	0.137	0.853	0.01	GCB	0.89	0.107	0.89	0.003	GCB	0.857	0.143	0.857	0	GCB	0.844	0.121	0.844	0.035	GCB	0.882	0.106	0.882	0.013	GCB	0.885	0.1	0.885	0.015	GCB	0.877	0.118	0.877	0.005	GCB	0.849	0.142	0.849	0.01	GCB
109	GSM275024	ABC	NA	79	2.8	0	GCB	0.824	TYPEIII	0.485	0.485	0.422	0.093	TYPEIII	0.345	0.345	0.314	0.341	ABC	0.833	0.066	0.101	0.833	ABC	0.499	0.044	0.456	0.499	ABC	0.54	0.028	0.433	0.54	ABC	0.517	0.036	0.447	0.517	ABC	0.619	0.043	0.338	0.619	ABC	0.767	0.054	0.179	0.767	ABC
156	GSM275018	ABC	female	77	2.13	1	GCB	0.821	ABC	0.694	0.272	0.035	0.694	ABC	0.723	0.244	0.033	0.723	ABC	0.856	0.129	0.015	0.856	ABC	0.782	0.143	0.075	0.782	ABC	0.653	0.303	0.044	0.653	ABC	0.614	0.341	0.045	0.614	ABC	0.71	0.263	0.027	0.71	ABC	0.715	0.243	0.041	0.715	ABC
79	GSM275048	TypeIII	NA	55	0.97	0	GCB	0.82	TYPEIII	0.539	0.539	0.372	0.088	TYPEIII	0.528	0.528	0.403	0.069	ABC	0.812	0.177	0.01	0.812	GCB	0.468	0.342	0.468	0.19	GCB	0.477	0.393	0.477	0.13	TYPEIII	0.466	0.466	0.357	0.177	GCB	0.458	0.098	0.458	0.444	GCB	0.698	0.113	0.698	0.189	TYPEIII
77	GSM275047	TypeIII	NA	75	2.69	0	GCB	0.805	TYPEIII	0.575	0.575	0.226	0.199	TYPEIII	0.553	0.553	0.227	0.22	ABC	0.828	0.166	0.006	0.828	TYPEIII	0.541	0.541	0.236	0.223	TYPEIII	0.682	0.682	0.183	0.135	TYPEIII	0.532	0.532	0.34	0.129	GCB	0.456	0.369	0.456	0.175	GCB	0.483	0.152	0.483	0.366	GCB
12	GSM274962	GCB	male	79	3.03	1	GCB	0.804	GCB	0.874	0.122	0.874	0.004	GCB	0.888	0.112	0.888	0	GCB	0.878	0.12	0.878	0.003	GCB	0.832	0.112	0.832	0.056	GCB	0.856	0.018	0.856	0.126	GCB	0.864	0.114	0.864	0.022	GCB	0.857	0.12	0.857	0.024	GCB	0.813	0.147	0.813	0.04	GCB
64	GSM274963	GCB	female	60	5.88	0	GCB	0.804	GCB	0.842	0.153	0.842	0.005	GCB	0.895	0.1	0.895	0.005	GCB	0.885	0.115	0.885	0	GCB	0.857	0.118	0.857	0.025	GCB	0.872	0.113	0.872	0.015	GCB	0.875	0.122	0.875	0.003	GCB	0.845	0.14	0.845	0.015	GCB	0.835	0.153	0.835	0.012	GCB
65	GSM275030	GCB	female	60	1.08	1	GCB	0.803	GCB	0.83	0.165	0.83	0.005	GCB	0.809	0.191	0.809	0	TYPEIII	0.553	0.553	0.441	0.006	GCB	0.563	0.395	0.563	0.043	GCB	0.602	0.378	0.602	0.02	GCB	0.869	0.104	0.869	0.028	GCB	0.888	0.107	0.888	0.005	GCB	0.856	0.144	0.856	0	GCB
40	GSM274991	GCB	male	47	3.43	0	GCB	0.798	GCB	0.908	0.089	0.908	0.003	GCB	0.914	0.086	0.914	0	GCB	0.913	0.087	0.913	0	GCB	0.889	0.101	0.889	0.01	GCB	0.909	0.091	0.909	0	GCB	0.905	0.092	0.905	0.003	GCB	0.9	0.1	0.9	0	GCB	0.904	0.095	0.904	0.001	GCB
41	GSM274994	GCB	male	45	4.29	0	GCB	0.792	GCB	0.632	0.363	0.632	0.005	GCB	0.79	0.207	0.79	0.003	GCB	0.601	0.399	0.601	0	GCB	0.718	0.236	0.718	0.046	GCB	0.854	0.123	0.854	0.023	GCB	0.857	0.108	0.857	0.035	GCB	0.85	0.118	0.85	0.033	GCB	0.76	0.198	0.76	0.042	GCB
6	GSM275004	GCB	NA	68	0.1	1	GCB	0.784	GCB	0.551	0.412	0.551	0.037	GCB	0.75	0.238	0.75	0.012	GCB	0.764	0.132	0.764	0.103	GCB	0.73	0.161	0.73	0.109	GCB	0.65	0.286	0.65	0.063	GCB	0.797	0.142	0.797	0.062	GCB	0.768	0.143	0.768	0.089	GCB	0.691	0.17	0.691	0.139	GCB
94	GSM275055	TypeIII	male	45	5.24	0	GCB	0.781	GCB	0.382	0.283	0.382	0.335	ABC	0.695	0.116	0.189	0.695	ABC	0.785	0.186	0.03	0.785	GCB	0.502	0.213	0.502	0.285	GCB	0.444	0.264	0.444	0.293	GCB	0.386	0.298	0.386	0.316	GCB	0.447	0.22	0.447	0.333	GCB	0.637	0.302	0.637	0.061	GCB
98	GSM275051	TypeIII	female	74	9.02	0	GCB	0.762	GCB	0.406	0.204	0.406	0.389	ABC	0.521	0.085	0.394	0.521	ABC	0.594	0.1	0.306	0.594	ABC	0.679	0.062	0.259	0.679	ABC	0.796	0.118	0.085	0.796	ABC	0.774	0.14	0.086	0.774	ABC	0.45	0.233	0.317	0.45	GCB	0.514	0.342	0.514	0.144	ABC
93	GSM274913	TypeIII	male	52	3.9	0	GCB	0.758	GCB	0.836	0.156	0.836	0.008	GCB	0.902	0.098	0.902	0	GCB	0.913	0.087	0.913	0	GCB	0.841	0.144	0.841	0.015	GCB	0.807	0.193	0.807	0	GCB	0.842	0.138	0.842	0.02	GCB	0.812	0.183	0.812	0.005	GCB	0.878	0.119	0.878	0.003	GCB
85	GSM275065	TypeIII	male	77	1.64	1	GCB	0.749	ABC	0.476	0.444	0.08	0.476	TYPEIII	0.506	0.506	0.06	0.434	ABC	0.854	0.137	0.009	0.854	ABC	0.736	0.157	0.108	0.736	ABC	0.77	0.175	0.056	0.77	ABC	0.793	0.171	0.036	0.793	ABC	0.476	0.357	0.167	0.476	ABC	0.475	0.219	0.306	0.475	GCB
13	GSM274929	GCB	male	78	9.65	0	GCB	0.743	GCB	0.592	0.27	0.592	0.138	TYPEIII	0.419	0.419	0.337	0.244	ABC	0.78	0.186	0.033	0.78	TYPEIII	0.458	0.458	0.454	0.089	TYPEIII	0.527	0.527	0.398	0.075	GCB	0.506	0.431	0.506	0.063	GCB	0.511	0.185	0.511	0.303	GCB	0.549	0.256	0.549	0.196	GCB
59	GSM274952	GCB	female	70	10.62	1	GCB	0.74	GCB	0.865	0.127	0.865	0.008	GCB	0.909	0.089	0.909	0.003	GCB	0.916	0.084	0.916	0	GCB	0.855	0.115	0.855	0.03	GCB	0.854	0.118	0.854	0.028	GCB	0.845	0.125	0.845	0.03	GCB	0.813	0.177	0.813	0.01	GCB	0.819	0.17	0.819	0.011	GCB
133	GSM274953	ABC	male	56	11.38	0	GCB	0.734	ABC	0.812	0.151	0.037	0.812	ABC	0.793	0.079	0.128	0.793	ABC	0.83	0.074	0.096	0.83	ABC	0.562	0.326	0.111	0.562	ABC	0.599	0.296	0.105	0.599	ABC	0.526	0.364	0.11	0.526	ABC	0.583	0.315	0.102	0.583	ABC	0.852	0.133	0.015	0.852	ABC
95	GSM275062	TypeIII	male	43	9.99	0	GCB	0.727	GCB	0.506	0.115	0.506	0.38	ABC	0.688	0.051	0.261	0.688	ABC	0.818	0.041	0.141	0.818	ABC	0.63	0.207	0.164	0.63	ABC	0.68	0.139	0.181	0.68	ABC	0.731	0.045	0.224	0.731	ABC	0.586	0.04	0.374	0.586	ABC	0.794	0.032	0.174	0.794	ABC
149	GSM274978	ABC	male	14	1.65	0	GCB	0.661	GCB	0.443	0.208	0.443	0.35	ABC	0.669	0.211	0.12	0.669	ABC	0.583	0.158	0.26	0.583	TYPEIII	0.44	0.44	0.271	0.289	ABC	0.544	0.147	0.309	0.544	TYPEIII	0.539	0.539	0.193	0.269	TYPEIII	0.631	0.631	0.111	0.258	TYPEIII	0.657	0.657	0.064	0.279	ABC
16	GSM275041	GCB	male	75	0.72	1	GCB	0.658	GCB	0.889	0.101	0.889	0.01	GCB	0.901	0.096	0.901	0.003	GCB	0.894	0.106	0.894	0	GCB	0.866	0.116	0.866	0.018	GCB	0.874	0.101	0.874	0.025	GCB	0.878	0.107	0.878	0.015	GCB	0.875	0.11	0.875	0.015	GCB	0.884	0.107	0.884	0.009	GCB
106	GSM275049	TypeIII	female	52	1.18	1	GCB	0.653	GCB	0.503	0.155	0.503	0.342	GCB	0.448	0.147	0.448	0.405	ABC	0.522	0.171	0.307	0.522	GCB	0.571	0.121	0.571	0.308	GCB	0.569	0.128	0.569	0.303	GCB	0.601	0.101	0.601	0.298	GCB	0.563	0.117	0.563	0.32	GCB	0.53	0.123	0.53	0.347	GCB
8	GSM274992	GCB	NA	51	6.87	1	GCB	0.644	GCB	0.852	0.138	0.852	0.01	GCB	0.889	0.109	0.889	0.003	GCB	0.879	0.121	0.879	0	GCB	0.866	0.109	0.866	0.025	GCB	0.877	0.103	0.877	0.02	GCB	0.875	0.11	0.875	0.015	GCB	0.865	0.115	0.865	0.02	GCB	0.884	0.108	0.884	0.008	GCB
100	GSM275072	TypeIII	female	70	2.26	1	GCB	0.61	GCB	0.452	0.435	0.452	0.113	GCB	0.57	0.384	0.57	0.046	TYPEIII	0.673	0.673	0.118	0.209	GCB	0.645	0.314	0.645	0.042	TYPEIII	0.599	0.599	0.373	0.028	GCB	0.523	0.429	0.523	0.049	GCB	0.681	0.272	0.681	0.047	GCB	0.861	0.124	0.861	0.015	TYPEIII
70	GSM275034	GCB	female	55	1.4	1	GCB	0.596	GCB	0.897	0.098	0.897	0.005	GCB	0.806	0.154	0.806	0.04	GCB	0.827	0.104	0.827	0.069	GCB	0.585	0.135	0.585	0.28	GCB	0.594	0.128	0.594	0.278	GCB	0.577	0.12	0.577	0.303	GCB	0.611	0.326	0.611	0.063	GCB	0.799	0.17	0.799	0.031	GCB
105	GSM275071	TypeIII	female	55	6.72	0	GCB	0.593	TYPEIII	0.693	0.693	0.194	0.113	TYPEIII	0.607	0.607	0.359	0.033	TYPEIII	0.528	0.528	0.413	0.059	GCB	0.758	0.188	0.758	0.054	GCB	0.719	0.205	0.719	0.076	GCB	0.692	0.259	0.692	0.049	GCB	0.62	0.319	0.62	0.061	GCB	0.821	0.164	0.821	0.015	GCB
103	GSM275061	TypeIII	female	59	1.01	1	GCB	0.589	ABC	0.687	0.276	0.037	0.687	TYPEIII	0.739	0.739	0.04	0.221	TYPEIII	0.604	0.604	0.015	0.381	TYPEIII	0.663	0.663	0.235	0.102	TYPEIII	0.709	0.709	0.08	0.211	TYPEIII	0.737	0.737	0.088	0.175	TYPEIII	0.641	0.641	0.11	0.249	TYPEIII	0.389	0.389	0.368	0.243	ABC
20	GSM274973	GCB	male	72	0.56	0	GCB	0.577	GCB	0.868	0.13	0.868	0.003	GCB	0.878	0.119	0.878	0.003	GCB	0.849	0.147	0.849	0.004	GCB	0.569	0.393	0.569	0.038	GCB	0.851	0.134	0.851	0.015	GCB	0.605	0.38	0.605	0.015	GCB	0.831	0.166	0.831	0.003	GCB	0.792	0.206	0.792	0.002	GCB
86	GSM275058	TypeIII	male	67	3.35	0	GCB	0.564	TYPEIII	0.735	0.735	0.19	0.075	TYPEIII	0.74	0.74	0.063	0.198	TYPEIII	0.641	0.641	0.028	0.331	GCB	0.628	0.266	0.628	0.106	GCB	0.67	0.149	0.67	0.182	TYPEIII	0.511	0.511	0.413	0.076	GCB	0.667	0.301	0.667	0.032	GCB	0.638	0.318	0.638	0.044	ABC
97	GSM275074	TypeIII	female	79	12.34	0	GCB	0.549	ABC	0.502	0.2	0.298	0.502	ABC	0.706	0.116	0.178	0.706	ABC	0.822	0.079	0.099	0.822	TYPEIII	0.522	0.522	0.191	0.287	TYPEIII	0.649	0.649	0.164	0.187	TYPEIII	0.467	0.467	0.186	0.347	TYPEIII	0.577	0.577	0.192	0.231	GCB	0.371	0.282	0.371	0.347	ABC
166	GSM274967	ABC	female	68	1.22	1	GCB	0.535	ABC	0.834	0.124	0.041	0.834	ABC	0.796	0.132	0.071	0.796	ABC	0.842	0.054	0.104	0.842	TYPEIII	0.419	0.419	0.301	0.28	TYPEIII	0.534	0.534	0.287	0.179	GCB	0.48	0.434	0.48	0.086	ABC	0.776	0.157	0.067	0.776	ABC	0.679	0.138	0.183	0.679	ABC
28	GSM275000	GCB	male	62	0.71	1	GCB	0.533	GCB	0.775	0.166	0.775	0.059	ABC	0.358	0.348	0.293	0.358	ABC	0.584	0.074	0.342	0.584	GCB	0.868	0.099	0.868	0.033	GCB	0.881	0.106	0.881	0.013	GCB	0.9	0.095	0.9	0.005	GCB	0.856	0.121	0.856	0.023	GCB	0.527	0.156	0.527	0.317	GCB
101	GSM275052	TypeIII	female	65	4.47	1	GCB	0.489	ABC	0.362	0.354	0.284	0.362	ABC	0.406	0.353	0.241	0.406	ABC	0.713	0.203	0.083	0.713	ABC	0.554	0.341	0.105	0.554	TYPEIII	0.465	0.465	0.109	0.426	TYPEIII	0.517	0.517	0.151	0.332	TYPEIII	0.472	0.472	0.067	0.461	ABC	0.401	0.245	0.354	0.401	TYPEIII
55	GSM274905	GCB	female	72	7.22	0	GCB	0.486	TYPEIII	0.673	0.673	0.277	0.05	TYPEIII	0.74	0.74	0.079	0.182	TYPEIII	0.778	0.778	0.067	0.155	GCB	0.722	0.24	0.722	0.038	GCB	0.772	0.203	0.772	0.025	GCB	0.798	0.176	0.798	0.026	GCB	0.507	0.453	0.507	0.04	GCB	0.444	0.407	0.444	0.149	GCB
30	GSM274927	GCB	male	59	5.88	0	GCB	0.442	TYPEIII	0.703	0.703	0.245	0.052	TYPEIII	0.572	0.572	0.363	0.065	GCB	0.598	0.228	0.598	0.174	GCB	0.735	0.207	0.735	0.058	TYPEIII	0.495	0.495	0.47	0.035	GCB	0.6	0.359	0.6	0.041	GCB	0.626	0.362	0.626	0.012	TYPEIII	0.55	0.55	0.429	0.021	GCB
96	GSM275053	TypeIII	male	42	1.64	0	GCB	0.396	ABC	0.758	0.207	0.035	0.758	ABC	0.705	0.266	0.03	0.705	ABC	0.709	0.289	0.002	0.709	ABC	0.63	0.314	0.056	0.63	ABC	0.635	0.322	0.043	0.635	ABC	0.486	0.464	0.049	0.486	ABC	0.547	0.404	0.048	0.547	ABC	0.693	0.27	0.037	0.693	TYPEIII
60	GSM274959	GCB	female	70	7.24	0	TypeIII	0.888	TYPEIII	0.719	0.719	0.161	0.12	TYPEIII	0.497	0.497	0.039	0.464	ABC	0.626	0.356	0.018	0.626	TYPEIII	0.72	0.72	0.211	0.069	TYPEIII	0.655	0.655	0.306	0.039	TYPEIII	0.589	0.589	0.364	0.047	TYPEIII	0.653	0.653	0.239	0.108	TYPEIII	0.707	0.707	0.176	0.116	GCB
80	GSM275023	TypeIII	NA	51	0.05	1	TypeIII	0.86	ABC	0.357	0.305	0.338	0.357	ABC	0.784	0.177	0.039	0.784	ABC	0.507	0.063	0.43	0.507	TYPEIII	0.432	0.432	0.223	0.346	TYPEIII	0.467	0.467	0.203	0.33	ABC	0.521	0.384	0.096	0.521	ABC	0.557	0.165	0.278	0.557	ABC	0.615	0.23	0.155	0.615	GCB
68	GSM275026	GCB	female	58	1.24	1	TypeIII	0.857	GCB	0.661	0.327	0.661	0.013	TYPEIII	0.488	0.488	0.484	0.028	TYPEIII	0.627	0.627	0.355	0.018	GCB	0.489	0.466	0.489	0.045	TYPEIII	0.577	0.577	0.398	0.025	GCB	0.527	0.466	0.527	0.008	TYPEIII	0.548	0.548	0.441	0.01	TYPEIII	0.552	0.552	0.432	0.016	TYPEIII
72	GSM275043	GCB	female	52	3.4	0	TypeIII	0.855	TYPEIII	0.62	0.62	0.345	0.035	TYPEIII	0.757	0.757	0.188	0.055	GCB	0.7	0.3	0.7	0	TYPEIII	0.828	0.828	0.147	0.025	TYPEIII	0.834	0.834	0.146	0.02	TYPEIII	0.832	0.832	0.145	0.023	TYPEIII	0.806	0.806	0.046	0.148	TYPEIII	0.693	0.693	0.209	0.098	TYPEIII
87	GSM275066	TypeIII	male	62	0	1	TypeIII	0.833	TYPEIII	0.719	0.719	0.243	0.038	TYPEIII	0.755	0.755	0.086	0.159	TYPEIII	0.633	0.633	0.36	0.008	TYPEIII	0.686	0.686	0.263	0.051	GCB	0.657	0.298	0.657	0.045	TYPEIII	0.722	0.722	0.255	0.023	TYPEIII	0.784	0.784	0.192	0.024	TYPEIII	0.646	0.646	0.29	0.064	GCB
81	GSM275067	TypeIII	male	85	1.51	1	TypeIII	0.826	TYPEIII	0.718	0.718	0.204	0.078	TYPEIII	0.75	0.75	0.181	0.069	TYPEIII	0.522	0.522	0.357	0.121	TYPEIII	0.678	0.678	0.162	0.16	TYPEIII	0.811	0.811	0.05	0.139	TYPEIII	0.504	0.504	0.412	0.084	TYPEIII	0.511	0.511	0.046	0.443	TYPEIII	0.502	0.502	0.083	0.415	TYPEIII
83	GSM275057	TypeIII	male	79	0.11	1	TypeIII	0.8	TYPEIII	0.742	0.742	0.166	0.092	TYPEIII	0.786	0.786	0.062	0.152	TYPEIII	0.814	0.814	0.059	0.127	GCB	0.769	0.205	0.769	0.026	TYPEIII	0.512	0.512	0.466	0.023	GCB	0.538	0.434	0.538	0.028	TYPEIII	0.597	0.597	0.379	0.024	GCB	0.697	0.292	0.697	0.011	TYPEIII
179	GSM274997	ABC	female	45	16.79	0	TypeIII	0.741	ABC	0.829	0.128	0.043	0.829	ABC	0.855	0.112	0.033	0.855	ABC	0.815	0.166	0.019	0.815	ABC	0.552	0.399	0.05	0.552	ABC	0.573	0.392	0.035	0.573	TYPEIII	0.55	0.55	0.02	0.429	ABC	0.868	0.112	0.02	0.868	ABC	0.829	0.135	0.035	0.829	ABC
137	GSM274968	ABC	male	49	10.75	0	TypeIII	0.722	ABC	0.851	0.143	0.006	0.851	ABC	0.908	0.092	0	0.908	ABC	0.821	0.179	0	0.821	ABC	0.833	0.122	0.045	0.833	ABC	0.862	0.126	0.013	0.862	ABC	0.865	0.125	0.01	0.865	ABC	0.861	0.134	0.005	0.861	ABC	0.88	0.118	0.003	0.88	ABC
104	GSM275075	TypeIII	female	59	3.13	1	TypeIII	0.656	ABC	0.704	0.277	0.019	0.704	ABC	0.832	0.157	0.011	0.832	ABC	0.861	0.139	0	0.861	ABC	0.739	0.164	0.096	0.739	ABC	0.66	0.26	0.081	0.66	ABC	0.687	0.247	0.065	0.687	ABC	0.622	0.333	0.046	0.622	ABC	0.475	0.275	0.25	0.475	ABC
89	GSM275064	TypeIII	male	61	11.02	1	TypeIII	0.654	TYPEIII	0.686	0.686	0.248	0.067	TYPEIII	0.752	0.752	0.095	0.153	TYPEIII	0.728	0.728	0.062	0.211	TYPEIII	0.601	0.601	0.342	0.057	GCB	0.574	0.386	0.574	0.04	TYPEIII	0.483	0.483	0.473	0.044	TYPEIII	0.445	0.445	0.405	0.15	TYPEIII	0.405	0.405	0.404	0.191	GCB
90	GSM275073	TypeIII	male	59	0.03	1	TypeIII	0.651	TYPEIII	0.733	0.733	0.056	0.211	TYPEIII	0.799	0.799	0.045	0.156	TYPEIII	0.697	0.697	0.068	0.235	TYPEIII	0.648	0.648	0.171	0.181	TYPEIII	0.444	0.444	0.357	0.199	TYPEIII	0.42	0.42	0.404	0.176	TYPEIII	0.637	0.637	0.244	0.12	TYPEIII	0.773	0.773	0.034	0.192	ABC
62	GSM275038	GCB	female	66	2.48	0	TypeIII	0.626	TYPEIII	0.549	0.549	0.393	0.058	TYPEIII	0.569	0.569	0.377	0.054	GCB	0.443	0.425	0.443	0.132	GCB	0.588	0.397	0.588	0.015	TYPEIII	0.755	0.755	0.233	0.013	TYPEIII	0.564	0.564	0.421	0.015	TYPEIII	0.607	0.607	0.384	0.009	GCB	0.691	0.292	0.691	0.017	GCB
164	GSM274985	ABC	female	70	4.13	1	TypeIII	0.587	ABC	0.596	0.384	0.02	0.596	ABC	0.788	0.211	0.001	0.788	ABC	0.795	0.197	0.008	0.795	ABC	0.529	0.439	0.033	0.529	ABC	0.53	0.437	0.033	0.53	ABC	0.591	0.396	0.013	0.591	ABC	0.811	0.182	0.008	0.811	ABC	0.83	0.163	0.008	0.83	ABC
82	GSM275070	TypeIII	male	83	0.33	1	TypeIII	0.559	GCB	0.381	0.324	0.381	0.295	ABC	0.711	0.213	0.076	0.711	ABC	0.826	0.158	0.016	0.826	ABC	0.446	0.393	0.161	0.446	TYPEIII	0.517	0.517	0.076	0.407	TYPEIII	0.408	0.408	0.199	0.392	ABC	0.398	0.298	0.305	0.398	GCB	0.459	0.179	0.459	0.362	ABC
45	GSM274955	GCB	male	32	0.76	1	TypeIII	0.553	GCB	0.571	0.349	0.571	0.08	GCB	0.606	0.124	0.606	0.27	GCB	0.606	0.118	0.606	0.276	GCB	0.486	0.443	0.486	0.071	TYPEIII	0.493	0.493	0.467	0.04	GCB	0.545	0.42	0.545	0.036	GCB	0.495	0.407	0.495	0.098	TYPEIII	0.586	0.586	0.297	0.117	GCB
17	GSM275012	GCB	male	73	1.1	1	TypeIII	0.534	TYPEIII	0.508	0.508	0.363	0.129	TYPEIII	0.56	0.56	0.337	0.103	TYPEIII	0.728	0.728	0.09	0.182	GCB	0.487	0.436	0.487	0.076	TYPEIII	0.739	0.739	0.22	0.041	GCB	0.489	0.487	0.489	0.025	TYPEIII	0.754	0.754	0.217	0.029	TYPEIII	0.688	0.688	0.125	0.187	TYPEIII
145	GSM275042	ABC	male	40	1.59	1	TypeIII	0.522	ABC	0.553	0.412	0.035	0.553	ABC	0.517	0.48	0.003	0.517	TYPEIII	0.695	0.695	0.028	0.278	ABC	0.518	0.378	0.104	0.518	ABC	0.502	0.388	0.11	0.502	ABC	0.524	0.129	0.348	0.524	ABC	0.527	0.415	0.058	0.527	TYPEIII	0.497	0.497	0.015	0.488	ABC
155	GSM274980	ABC	female	77	0.06	1	TypeIII	0.519	ABC	0.825	0.156	0.018	0.825	ABC	0.904	0.096	0	0.904	ABC	0.879	0.12	0	0.879	ABC	0.884	0.109	0.008	0.884	ABC	0.889	0.106	0.005	0.889	ABC	0.896	0.094	0.01	0.896	ABC	0.908	0.092	0	0.908	ABC	0.902	0.095	0.003	0.902	ABC
148	GSM274958	ABC	male	35	1.7	1	TypeIII	0.516	ABC	0.894	0.1	0.006	0.894	ABC	0.916	0.084	0	0.916	ABC	0.861	0.137	0.003	0.861	ABC	0.866	0.109	0.025	0.866	ABC	0.889	0.098	0.013	0.889	ABC	0.894	0.106	0	0.894	ABC	0.902	0.098	0	0.902	ABC	0.892	0.107	0	0.892	ABC
181	GSM274901	ABC	female	18	0.05	1	TypeIII	0.505	TYPEIII	0.567	0.567	0.103	0.331	TYPEIII	0.428	0.428	0.239	0.333	TYPEIII	0.505	0.505	0.339	0.156	GCB	0.394	0.325	0.394	0.282	TYPEIII	0.488	0.488	0.452	0.06	TYPEIII	0.485	0.485	0.353	0.162	GCB	0.371	0.361	0.371	0.269	TYPEIII	0.621	0.621	0.032	0.346	ABC
99	GSM275068	TypeIII	female	72	1.67	0	TypeIII	0.498	TYPEIII	0.677	0.677	0.036	0.286	TYPEIII	0.528	0.528	0.019	0.452	TYPEIII	0.562	0.562	0.057	0.381	TYPEIII	0.698	0.698	0.234	0.067	TYPEIII	0.783	0.783	0.134	0.083	TYPEIII	0.754	0.754	0.146	0.1	TYPEIII	0.789	0.789	0.05	0.161	GCB	0.481	0.426	0.481	0.093	TYPEIII
154	GSM275044	ABC	female	81	3.58	1	TypeIII	0.467	TYPEIII	0.569	0.569	0.031	0.4	ABC	0.444	0.268	0.288	0.444	TYPEIII	0.724	0.724	0.024	0.252	TYPEIII	0.639	0.639	0.043	0.318	TYPEIII	0.551	0.551	0.048	0.402	ABC	0.415	0.293	0.293	0.415	ABC	0.526	0.454	0.02	0.526	ABC	0.527	0.466	0.007	0.527	ABC
51	GSM274935	GCB	female	78	1.33	1	TypeIII	0.355	GCB	0.567	0.349	0.567	0.084	GCB	0.511	0.404	0.511	0.085	GCB	0.583	0.09	0.583	0.327	ABC	0.427	0.316	0.257	0.427	GCB	0.681	0.156	0.681	0.163	GCB	0.652	0.198	0.652	0.15	TYPEIII	0.698	0.698	0.084	0.217	TYPEIII	0.644	0.644	0.172	0.184	GCB
[truncated: 76 more columns]

## Sheet: GSE10846_RCHOP
									WRIGHT TRAINED
	Meta Info								Wright Trained, Classifier Selection
OriginalOrder	Sample	GEO_Class	Sex	Age	Follow-up	Follow-up Status	ClassLMT_J48_RF100_SMO	MaxConf	ClassBayesNet	TypeIII	ABC	GCB	ClassBFTree	TypeIII	ABC	GCB	ClassFT	TypeIII	ABC	GCB	ClassJ48	TypeIII	ABC	GCB	ClassLMT	TypeIII	ABC	GCB	ClassNBTree	TypeIII	ABC	GCB	ClassRandomTree	TypeIII	ABC	GCB	ClassREPTree	TypeIII	ABC	GCB	ClassRF100	TypeIII	ABC	GCB	ClassRF200	TypeIII	ABC	GCB	ClassSimpleCart
188	GSM275297	ABC	male	45	0.67	0	ABC	0.897	ABC	0	1	0	ABC	0.058	0.923	0.019	ABC	0.004	0.996	0	ABC	0.016	0.984	0	ABC	0.018	0.982	0	ABC	0.033	0.944	0.022	ABC	0	1	0	ABC	0.086	0.803	0.112	ABC	0.035	0.955	0.01	ABC	0.023	0.968	0.01	ABC
146	GSM275206	ABC	male	82	1.27	1	ABC	0.896	ABC	0	1	0	ABC	0	0.968	0.032	ABC	0	1	0	ABC	0.016	0.984	0	ABC	0.045	0.953	0.002	ABC	0.033	0.944	0.022	ABC	0	1	0	ABC	0.086	0.803	0.112	ABC	0.01	0.98	0.01	ABC	0.01	0.965	0.025	ABC
224	GSM275242	ABC	female	51	3.28	0	ABC	0.877	ABC	0	1	0	GCB	0.034	0.04	0.927	ABC	0.027	0.973	0	ABC	0.016	0.984	0	ABC	0.01	0.99	0	ABC	0.024	0.892	0.084	ABC	0	1	0	ABC	0.086	0.803	0.112	ABC	0.055	0.865	0.08	ABC	0.051	0.864	0.085	ABC
155	GSM275291	ABC	male	74	0.21	1	ABC	0.867	ABC	0.001	0.999	0	ABC	0.058	0.923	0.019	ABC	0	1	0	ABC	0.016	0.984	0	ABC	0.037	0.962	0.001	ABC	0.033	0.944	0.022	ABC	0	1	0	ABC	0.086	0.803	0.112	ABC	0.134	0.856	0.01	ABC	0.122	0.863	0.015	ABC
186	GSM275123	ABC	male	48	0.15	1	ABC	0.862	ABC	0	1	0	ABC	0.058	0.923	0.019	ABC	0	1	0	ABC	0.016	0.984	0	ABC	0.023	0.972	0.006	ABC	0.001	0.994	0.006	ABC	0	1	0	ABC	0.086	0.803	0.112	ABC	0.004	0.826	0.17	ABC	0.017	0.858	0.125	ABC
232	GSM275143	ABC	female	35	3.93	0	ABC	0.861	ABC	0	1	0	ABC	0.058	0.923	0.019	ABC	0	1	0	ABC	0.016	0.984	0	ABC	0.022	0.95	0.028	ABC	0.016	0.944	0.04	ABC	0	1	0	ABC	0.086	0.803	0.112	ABC	0.088	0.844	0.069	ABC	0.081	0.835	0.084	ABC
171	GSM275142	ABC	male	64	3.14	0	ABC	0.859	ABC	0	0.999	0.001	ABC	0.058	0.923	0.019	ABC	0	1	0	ABC	0.016	0.984	0	ABC	0.013	0.929	0.057	ABC	0.004	0.996	0	ABC	0	1	0	ABC	0.086	0.803	0.112	ABC	0.016	0.857	0.127	ABC	0.023	0.807	0.17	ABC
190	GSM275112	ABC	male	41	1.91	0	ABC	0.857	ABC	0.003	0.997	0	ABC	0.058	0.923	0.019	ABC	0.001	0.999	0	ABC	0.016	0.984	0	ABC	0.047	0.951	0.002	ABC	0.033	0.944	0.022	GCB	0	0	1	ABC	0.086	0.803	0.112	ABC	0.14	0.826	0.034	ABC	0.116	0.862	0.022	ABC
156	GSM275076	ABC	male	73	2.52	0	ABC	0.853	ABC	0	1	0	ABC	0.058	0.923	0.019	ABC	0	1	0	ABC	0.016	0.984	0	ABC	0.035	0.933	0.032	ABC	0.001	0.994	0.006	ABC	0	1	0	ABC	0.086	0.803	0.112	ABC	0.062	0.829	0.108	ABC	0.084	0.832	0.084	ABC
149	GSM275203	ABC	male	77	0.04	1	ABC	0.853	ABC	0.003	0.997	0	ABC	0	1	0	ABC	0.016	0.984	0	ABC	0.016	0.984	0	ABC	0.054	0.944	0.001	ABC	0.001	0.994	0.006	TypeIII	1	0	0	ABC	0.086	0.803	0.112	ABC	0.164	0.816	0.02	ABC	0.164	0.79	0.046	ABC
157	GSM275216	ABC	male	73	0.24	0	ABC	0.848	ABC	0	1	0	ABC	0	0.968	0.032	ABC	0	1	0	ABC	0.096	0.904	0	ABC	0.002	0.998	0	GCB	0.386	0.187	0.427	ABC	0	1	0	ABC	0.086	0.803	0.112	ABC	0.06	0.823	0.117	ABC	0.051	0.856	0.094	ABC
175	GSM275179	ABC	male	59	3.12	0	ABC	0.845	ABC	0	1	0	ABC	0	1	0	ABC	0	1	0	ABC	0.225	0.775	0	ABC	0.026	0.974	0	GCB	0.386	0.187	0.427	ABC	0	1	0	ABC	0.086	0.803	0.112	ABC	0.02	0.965	0.016	ABC	0.042	0.946	0.012	ABC
195	GSM275125	ABC	female	84	1.41	1	ABC	0.838	ABC	0.005	0.995	0	ABC	0.058	0.923	0.019	ABC	0	1	0	ABC	0.016	0.984	0	ABC	0.019	0.972	0.008	TypeIII	0.783	0.163	0.054	TypeIII	1	0	0	ABC	0.086	0.803	0.112	ABC	0.198	0.728	0.074	ABC	0.203	0.715	0.082	ABC
148	GSM275130	ABC	male	78	0.01	1	ABC	0.83	ABC	0	1	0	ABC	0	1	0	ABC	0.001	0.999	0	ABC	0.225	0.775	0	ABC	0.067	0.931	0.001	ABC	0.024	0.975	0.001	ABC	0	1	0	ABC	0.086	0.803	0.112	ABC	0.036	0.948	0.016	ABC	0.056	0.936	0.008	ABC
216	GSM275256	ABC	female	63	3.35	0	ABC	0.83	ABC	0.002	0.998	0	ABC	0.058	0.923	0.019	TypeIII	0.891	0.109	0	ABC	0.016	0.984	0	ABC	0.082	0.906	0.013	ABC	0.033	0.944	0.022	ABC	0	1	0	TypeIII	0.875	0.125	0	ABC	0.186	0.764	0.05	ABC	0.171	0.788	0.042	ABC
141	GSM275155	ABC	male	92	0.74	1	ABC	0.829	ABC	0	1	0	ABC	0.058	0.923	0.019	ABC	0	1	0	ABC	0.016	0.984	0	ABC	0.145	0.855	0	ABC	0.033	0.944	0.022	ABC	0	1	0	ABC	0.086	0.803	0.112	ABC	0.119	0.811	0.07	ABC	0.121	0.808	0.07	ABC
189	GSM275272	ABC	male	42	3.22	0	ABC	0.825	ABC	0	1	0	ABC	0.058	0.923	0.019	ABC	0.002	0.998	0	ABC	0.096	0.904	0	ABC	0.048	0.921	0.031	ABC	0.033	0.944	0.022	ABC	0	1	0	GCB	0.084	0.177	0.739	ABC	0.077	0.81	0.113	ABC	0.093	0.795	0.112	ABC
201	GSM275207	ABC	female	77	0.36	1	ABC	0.819	ABC	0	1	0	ABC	0	1	0	ABC	0	1	0	ABC	0.225	0.775	0	ABC	0.062	0.938	0	GCB	0.386	0.187	0.427	ABC	0	1	0	ABC	0.086	0.803	0.112	ABC	0.088	0.896	0.016	ABC	0.118	0.866	0.017	ABC
221	GSM275135	ABC	female	54	2.93	0	ABC	0.818	ABC	0.005	0.995	0	ABC	0.058	0.923	0.019	ABC	0.001	0.999	0	ABC	0	0.848	0.152	ABC	0.146	0.849	0.005	ABC	0.003	0.997	0	TypeIII	1	0	0	ABC	0.086	0.803	0.112	ABC	0.093	0.907	0	ABC	0.076	0.908	0.015	ABC
145	GSM275080	ABC	male	83	3.42	0	ABC	0.815	ABC	0	1	0	ABC	0	1	0	ABC	0	1	0	ABC	0.225	0.775	0	ABC	0.049	0.95	0.001	ABC	0.269	0.691	0.04	ABC	0	1	0	ABC	0.086	0.803	0.112	ABC	0.099	0.869	0.032	ABC	0.117	0.841	0.042	ABC
154	GSM275275	ABC	male	74	0.41	1	ABC	0.813	ABC	0.001	0.999	0	GCB	0	0	1	ABC	0	1	0	ABC	0.225	0.775	0	ABC	0.02	0.98	0	ABC	0.002	0.998	0	ABC	0	1	0	ABC	0.086	0.803	0.112	ABC	0.1	0.831	0.069	ABC	0.083	0.847	0.07	GCB
230	GSM275293	ABC	female	46	0.81	0	ABC	0.813	ABC	0	1	0	ABC	0	0.968	0.032	ABC	0.013	0.987	0	ABC	0.096	0.904	0	ABC	0.018	0.963	0.019	GCB	0.067	0.224	0.71	ABC	0	1	0	GCB	0.084	0.177	0.739	ABC	0.079	0.716	0.204	ABC	0.09	0.711	0.198	ABC
203	GSM275140	ABC	female	75	1.04	0	ABC	0.809	ABC	0	1	0	ABC	0	0.968	0.032	ABC	0.138	0.862	0	ABC	0.096	0.904	0	ABC	0.016	0.967	0.017	GCB	0.386	0.187	0.427	ABC	0	1	0	ABC	0.086	0.803	0.112	ABC	0.11	0.697	0.193	ABC	0.075	0.749	0.176	ABC
229	GSM275161	ABC	female	49	0.3	1	ABC	0.803	ABC	0.11	0.888	0.001	ABC	0	1	0	ABC	0	1	0	ABC	0	0.848	0.152	ABC	0.07	0.906	0.025	GCB	0.386	0.187	0.427	ABC	0	1	0	ABC	0.086	0.803	0.112	ABC	0.113	0.791	0.097	ABC	0.126	0.775	0.099	ABC
142	GSM275185	ABC	male	85	0.09	1	ABC	0.795	ABC	0.001	0.999	0	ABC	0.058	0.923	0.019	ABC	0.002	0.998	0	ABC	0.016	0.984	0	ABC	0.261	0.737	0.001	TypeIII	0.977	0.022	0.001	ABC	0	1	0	ABC	0.086	0.803	0.112	ABC	0.189	0.791	0.02	ABC	0.19	0.785	0.025	ABC
147	GSM275241	ABC	male	79	2.98	0	ABC	0.795	ABC	0	1	0	ABC	0	1	0	ABC	0	1	0	ABC	0.225	0.775	0	ABC	0.073	0.926	0	GCB	0.19	0.275	0.535	ABC	0	1	0	ABC	0.086	0.803	0.112	ABC	0.169	0.812	0.019	ABC	0.189	0.79	0.021	ABC
143	GSM275196	ABC	male	85	2.74	0	ABC	0.784	ABC	0.055	0.945	0	TypeIII	0.973	0	0.027	ABC	0.495	0.505	0	ABC	0.016	0.984	0	ABC	0.077	0.921	0.002	TypeIII	0.6	0.267	0.133	ABC	0	1	0	ABC	0.086	0.803	0.112	ABC	0.337	0.565	0.098	ABC	0.362	0.574	0.064	TypeIII
167	GSM275151	ABC	male	67	5.11	0	ABC	0.781	ABC	0	0.999	0	ABC	0.058	0.923	0.019	ABC	0	1	0	ABC	0.016	0.984	0	ABC	0.059	0.728	0.213	TypeIII	0.6	0.267	0.133	ABC	0	1	0	ABC	0.086	0.803	0.112	ABC	0.022	0.745	0.233	ABC	0.043	0.716	0.24	ABC
151	GSM275236	ABC	male	76	0.96	1	ABC	0.781	ABC	0.001	0.999	0	ABC	0.058	0.923	0.019	ABC	0.002	0.998	0	ABC	0.016	0.984	0	ABC	0.127	0.865	0.008	ABC	0.033	0.887	0.08	ABC	0	1	0	GCB	0.043	0.016	0.941	ABC	0.285	0.606	0.109	ABC	0.274	0.609	0.116	ABC
222	GSM275199	ABC	female	54	0.46	1	ABC	0.78	ABC	0	1	0	ABC	0.058	0.923	0.019	ABC	0.001	0.999	0	ABC	0.096	0.904	0	ABC	0.029	0.94	0.031	ABC	0.001	0.994	0.006	ABC	0	1	0	GCB	0.084	0.177	0.739	ABC	0.149	0.611	0.241	ABC	0.123	0.641	0.236	ABC
206	GSM275300	ABC	female	75	0.4	0	ABC	0.78	ABC	0.001	0.999	0	ABC	0.058	0.923	0.019	ABC	0.001	0.999	0	ABC	0.016	0.984	0	ABC	0.301	0.694	0.005	ABC	0.041	0.959	0	ABC	0	1	0	ABC	0.086	0.803	0.112	ABC	0.187	0.773	0.04	ABC	0.158	0.803	0.039	ABC
172	GSM275279	ABC	male	62	3.82	1	ABC	0.776	ABC	0	1	0	ABC	0.058	0.923	0.019	ABC	0	1	0	ABC	0.096	0.904	0	ABC	0.015	0.889	0.097	ABC	0.033	0.944	0.022	ABC	0	1	0	ABC	0.086	0.803	0.112	ABC	0.044	0.644	0.312	ABC	0.043	0.691	0.267	ABC
200	GSM275136	ABC	female	77	0.24	1	ABC	0.769	ABC	0.009	0.991	0	ABC	0.058	0.923	0.019	ABC	0.001	0.999	0	ABC	0.016	0.984	0	ABC	0.303	0.68	0.017	ABC	0.001	0.994	0.006	ABC	0	1	0	ABC	0.086	0.803	0.112	ABC	0.225	0.745	0.03	ABC	0.205	0.761	0.034	ABC
207	GSM275109	ABC	female	74	1.49	1	ABC	0.766	ABC	0	1	0	ABC	0	0.968	0.032	ABC	0.039	0.961	0	ABC	0.096	0.904	0	ABC	0.047	0.807	0.146	GCB	0.242	0.022	0.736	ABC	0	1	0	GCB	0.084	0.177	0.739	ABC	0.084	0.684	0.232	ABC	0.084	0.678	0.238	ABC
177	GSM275160	ABC	male	57	0.89	1	ABC	0.765	ABC	0.002	0.998	0	ABC	0.058	0.923	0.019	ABC	0.005	0.995	0	ABC	0.096	0.904	0	ABC	0.332	0.661	0.006	ABC	0.001	0.994	0.006	TypeIII	1	0	0	ABC	0.086	0.803	0.112	ABC	0.14	0.829	0.03	ABC	0.146	0.832	0.021	ABC
194	GSM275188	ABC	female	86	0.15	1	ABC	0.761	ABC	0.044	0.956	0	TypeIII	0.973	0	0.027	TypeIII	0.731	0.269	0	ABC	0.016	0.984	0	ABC	0.31	0.688	0.003	ABC	0.006	0.952	0.042	ABC	0	1	0	ABC	0.086	0.803	0.112	ABC	0.212	0.705	0.083	ABC	0.248	0.664	0.088	TypeIII
182	GSM275132	ABC	male	51	1.3	0	ABC	0.755	ABC	0	1	0	ABC	0.058	0.923	0.019	TypeIII	0.991	0.009	0.001	ABC	0.016	0.984	0	TypeIII	0.538	0.444	0.018	ABC	0.003	0.997	0	TypeIII	1	0	0	ABC	0.086	0.803	0.112	ABC	0.074	0.926	0	ABC	0.084	0.905	0.011	ABC
165	GSM275172	ABC	male	68	0.94	1	ABC	0.751	ABC	0.003	0.997	0	GCB	0	0	1	ABC	0.005	0.995	0	ABC	0.096	0.904	0	ABC	0.153	0.844	0.003	GCB	0.242	0.022	0.736	GCB	0	0	1	GCB	0.084	0.177	0.739	ABC	0.224	0.587	0.188	ABC	0.182	0.64	0.178	GCB
191	GSM275226	ABC	male	30	1.01	1	ABC	0.748	ABC	0	1	0	ABC	0	0.968	0.032	ABC	0.007	0.993	0	ABC	0.096	0.904	0	ABC	0.014	0.68	0.307	ABC	0.033	0.944	0.022	ABC	0	1	0	GCB	0.084	0.177	0.739	ABC	0.021	0.74	0.239	ABC	0.039	0.736	0.225	ABC
184	GSM275267	ABC	male	51	1.47	0	ABC	0.746	ABC	0.271	0.564	0.164	ABC	0.058	0.923	0.019	ABC	0	1	0	ABC	0.096	0.904	0	ABC	0.03	0.868	0.103	ABC	0.016	0.944	0.04	ABC	0	1	0	GCB	0.084	0.177	0.739	ABC	0.126	0.547	0.328	ABC	0.119	0.591	0.29	ABC
180	GSM275100	ABC	male	52	1.98	0	ABC	0.745	ABC	0	1	0	ABC	0	1	0	ABC	0.003	0.997	0	ABC	0	0.838	0.162	ABC	0.273	0.718	0.009	GCB	0.386	0.187	0.427	TypeIII	1	0	0	GCB	0.201	0.074	0.726	ABC	0.16	0.756	0.084	ABC	0.207	0.715	0.079	ABC
153	GSM275221	ABC	male	74	1.37	0	ABC	0.745	ABC	0	1	0	ABC	0.058	0.923	0.019	ABC	0	1	0	ABC	0.096	0.904	0	ABC	0.048	0.717	0.235	ABC	0.001	0.994	0.006	ABC	0	1	0	GCB	0.201	0.074	0.726	ABC	0.16	0.693	0.147	ABC	0.114	0.732	0.155	ABC
210	GSM275174	ABC	female	72	0.03	1	ABC	0.741	ABC	0.001	0.998	0.001	ABC	0	1	0	ABC	0	1	0	ABC	0	0.848	0.152	ABC	0.041	0.833	0.126	ABC	0.28	0.717	0.003	ABC	0	1	0	ABC	0.086	0.803	0.112	ABC	0.187	0.617	0.196	ABC	0.197	0.615	0.187	GCB
181	GSM275229	ABC	male	52	2.03	0	ABC	0.736	ABC	0.036	0.964	0	ABC	0.058	0.923	0.019	ABC	0	1	0	ABC	0.096	0.904	0	ABC	0.024	0.954	0.023	TypeIII	0.4	0.356	0.244	TypeIII	1	0	0	GCB	0.043	0.016	0.941	ABC	0.307	0.421	0.272	ABC	0.32	0.438	0.242	ABC
158	GSM275217	ABC	male	73	0.17	1	ABC	0.73	ABC	0.016	0.984	0	GCB	0	0	1	ABC	0	1	0	ABC	0	0.848	0.152	ABC	0.086	0.881	0.034	ABC	0.269	0.691	0.04	ABC	0	1	0	GCB	0.084	0.177	0.739	ABC	0.196	0.526	0.278	ABC	0.19	0.543	0.267	GCB
110	GSM275205	TypeIII	male	77	0.61	0	ABC	0.719	GCB	0.081	0.065	0.854	ABC	0	0.968	0.032	TypeIII	0.545	0.455	0	ABC	0.016	0.984	0	ABC	0.13	0.799	0.071	ABC	0.111	0.879	0.009	TypeIII	1	0	0	ABC	0.086	0.803	0.112	ABC	0.164	0.425	0.411	ABC	0.15	0.435	0.415	ABC
223	GSM275122	ABC	female	52	2.56	0	ABC	0.715	ABC	0.037	0.955	0.009	ABC	0.058	0.923	0.019	ABC	0	1	0	ABC	0.016	0.984	0	ABC	0.249	0.581	0.17	ABC	0.193	0.64	0.167	GCB	0	0	1	ABC	0.086	0.803	0.112	ABC	0.242	0.627	0.131	ABC	0.2	0.691	0.108	ABC
183	GSM275235	ABC	male	51	1.55	1	ABC	0.709	ABC	0.02	0.98	0	ABC	0.058	0.923	0.019	TypeIII	0.967	0.033	0	ABC	0	0.848	0.152	ABC	0.255	0.686	0.059	ABC	0.123	0.866	0.01	TypeIII	1	0	0	ABC	0.086	0.803	0.112	ABC	0.2	0.635	0.165	ABC	0.196	0.665	0.139	ABC
164	GSM275139	ABC	male	68	1.66	0	ABC	0.707	ABC	0.128	0.869	0.002	ABC	0	1	0	ABC	0	1	0	ABC	0.225	0.775	0	ABC	0.364	0.625	0.011	TypeIII	0.641	0.058	0.301	ABC	0	1	0	ABC	0.086	0.803	0.112	ABC	0.137	0.763	0.1	ABC	0.179	0.736	0.085	ABC
199	GSM275121	ABC	female	78	2.5	0	ABC	0.682	TypeIII	0.604	0.395	0	ABC	0.058	0.923	0.019	ABC	0.002	0.998	0	ABC	0	0.848	0.152	ABC	0.298	0.652	0.05	ABC	0.057	0.943	0	TypeIII	1	0	0	ABC	0.086	0.803	0.112	ABC	0.352	0.562	0.086	ABC	0.294	0.612	0.094	ABC
212	GSM275238	ABC	female	64	0.86	1	ABC	0.682	ABC	0.067	0.933	0	ABC	0.058	0.923	0.019	GCB	0.222	0.186	0.592	ABC	0.016	0.984	0	ABC	0.189	0.407	0.404	ABC	0.033	0.887	0.08	ABC	0	1	0	GCB	0.201	0.074	0.726	ABC	0.267	0.671	0.062	ABC	0.244	0.696	0.06	ABC
209	GSM275189	ABC	female	73	0.51	1	ABC	0.672	ABC	0.2	0.8	0	TypeIII	0.973	0	0.027	ABC	0	1	0	ABC	0.016	0.984	0	TypeIII	0.525	0.456	0.019	ABC	0.001	0.994	0.006	TypeIII	1	0	0	ABC	0.086	0.803	0.112	ABC	0.372	0.581	0.047	ABC	0.324	0.621	0.055	TypeIII
227	GSM275088	ABC	female	49	5.17	0	ABC	0.631	ABC	0.062	0.932	0.006	TypeIII	1	0	0	TypeIII	0.949	0.027	0.024	ABC	0.225	0.775	0	ABC	0.387	0.566	0.046	TypeIII	0.71	0.15	0.14	ABC	0	1	0	ABC	0.086	0.803	0.112	ABC	0.291	0.518	0.191	ABC	0.296	0.517	0.187	TypeIII
161	GSM275237	ABC	male	71	2.58	0	ABC	0.623	ABC	0.001	0.999	0	TypeIII	0.973	0	0.027	ABC	0	1	0	TypeIII	0.805	0.065	0.13	ABC	0.049	0.949	0.002	TypeIII	0.6	0.267	0.133	ABC	0	1	0	ABC	0.086	0.803	0.112	ABC	0.159	0.811	0.03	ABC	0.15	0.826	0.025	TypeIII
137	GSM275168	TypeIII	female	35	4.01	0	ABC	0.62	TypeIII	0.52	0	0.48	TypeIII	0.958	0	0.042	ABC	0	1	0	ABC	0.225	0.775	0	ABC	0.102	0.803	0.094	GCB	0.021	0.021	0.959	ABC	0	1	0	ABC	0.086	0.803	0.112	GCB	0.231	0.234	0.535	GCB	0.244	0.248	0.508	TypeIII
233	GSM275119	ABC	female	26	3.94	0	ABC	0.614	ABC	0	1	0	TypeIII	1	0	0	ABC	0.001	0.999	0	GCB	0	0	1	ABC	0.019	0.97	0.011	ABC	0.269	0.691	0.04	ABC	0	1	0	ABC	0.086	0.803	0.112	ABC	0.071	0.819	0.11	ABC	0.085	0.795	0.121	TypeIII
169	GSM275120	ABC	male	64	2.49	0	ABC	0.612	ABC	0	0.998	0.002	ABC	0	0.968	0.032	ABC	0.002	0.998	0	ABC	0.096	0.904	0	GCB	0.011	0.307	0.682	ABC	0.033	0.944	0.022	ABC	0	1	0	GCB	0.084	0.177	0.739	ABC	0.139	0.571	0.29	ABC	0.101	0.588	0.311	ABC
219	GSM275307	ABC	female	58	1.16	1	ABC	0.611	GCB	0	0	1	ABC	0	0.968	0.032	GCB	0.023	0.024	0.954	ABC	0.225	0.775	0	ABC	0.008	0.797	0.195	ABC	0.04	0.916	0.045	ABC	0	1	0	ABC	0.086	0.803	0.112	ABC	0.079	0.539	0.382	ABC	0.067	0.572	0.361	ABC
166	GSM275290	ABC	male	68	0.67	0	ABC	0.604	ABC	0.127	0.873	0	GCB	0	0	1	ABC	0.018	0.982	0	ABC	0.225	0.775	0	TypeIII	0.569	0.43	0.001	ABC	0.021	0.979	0	GCB	0.346	0	0.654	ABC	0.086	0.803	0.112	ABC	0.29	0.547	0.163	ABC	0.304	0.578	0.118	GCB
163	GSM275091	ABC	male	69	1.88	1	ABC	0.582	TypeIII	0.635	0.365	0.001	ABC	0.058	0.923	0.019	TypeIII	0.385	0.265	0.351	ABC	0.016	0.984	0	TypeIII	0.448	0.214	0.338	TypeIII	0.682	0.285	0.034	TypeIII	1	0	0	TypeIII	0.875	0.125	0	ABC	0.322	0.463	0.215	ABC	0.311	0.523	0.166	ABC
152	GSM275097	ABC	male	74	3.75	0	ABC	0.577	ABC	0	0.997	0.002	GCB	0	0	1	GCB	0.39	0.003	0.607	ABC	0.096	0.904	0	ABC	0.069	0.522	0.409	GCB	0.386	0.187	0.427	ABC	0	1	0	ABC	0.086	0.803	0.112	ABC	0.072	0.548	0.38	ABC	0.085	0.59	0.325	GCB
134	GSM275252	TypeIII	female	71	4.42	0	ABC	0.574	ABC	0.087	0.599	0.314	GCB	0	0	1	GCB	0.012	0.363	0.625	ABC	0.096	0.904	0	ABC	0.036	0.732	0.233	TypeIII	0.6	0.267	0.133	ABC	0	1	0	GCB	0.084	0.177	0.739	GCB	0.115	0.327	0.558	GCB	0.107	0.378	0.514	GCB
225	GSM275289	ABC	female	51	0.62	0	ABC	0.574	TypeIII	0.934	0.06	0.007	TypeIII	0.958	0	0.042	TypeIII	0.984	0.008	0.008	ABC	0.016	0.984	0	ABC	0.364	0.552	0.084	TypeIII	0.678	0.237	0.086	ABC	0	1	0	ABC	0.086	0.803	0.112	ABC	0.217	0.429	0.354	ABC	0.279	0.399	0.322	TypeIII
187	GSM275277	ABC	male	46	3.52	0	ABC	0.568	TypeIII	0.997	0.002	0	ABC	0.058	0.923	0.019	TypeIII	0.741	0.227	0.031	ABC	0.016	0.984	0	TypeIII	0.477	0.463	0.06	TypeIII	0.783	0.163	0.054	TypeIII	1	0	0	TypeIII	0.875	0.125	0	ABC	0.393	0.492	0.115	ABC	0.388	0.529	0.083	ABC
213	GSM275271	ABC	female	64	0.58	1	ABC	0.564	ABC	0.021	0.979	0	ABC	0.058	0.923	0.019	TypeIII	0.717	0.187	0.096	ABC	0	0.848	0.152	GCB	0.362	0.27	0.368	ABC	0.033	0.887	0.08	TypeIII	1	0	0	GCB	0.043	0.016	0.941	ABC	0.29	0.47	0.24	ABC	0.292	0.465	0.243	ABC
226	GSM275269	ABC	female	50	1.53	0	ABC	0.561	ABC	0.001	0.999	0	TypeIII	0.898	0	0.102	TypeIII	0.927	0.009	0.064	ABC	0.016	0.984	0	TypeIII	0.599	0.337	0.064	ABC	0.421	0.561	0.018	ABC	0	1	0	ABC	0.086	0.803	0.112	ABC	0.288	0.591	0.121	ABC	0.306	0.538	0.156	GCB
228	GSM275128	ABC	female	49	1.38	1	ABC	0.545	ABC	0.001	0.999	0	GCB	0.034	0.04	0.927	ABC	0.047	0.953	0	GCB	0.009	0.013	0.978	ABC	0.153	0.822	0.025	ABC	0.033	0.944	0.022	ABC	0	1	0	ABC	0.086	0.803	0.112	ABC	0.133	0.676	0.19	ABC	0.126	0.719	0.155	GCB
170	GSM275141	ABC	male	64	0.69	1	ABC	0.545	ABC	0	1	0	ABC	0.058	0.923	0.019	ABC	0	1	0	GCB	0.009	0.013	0.978	ABC	0.018	0.759	0.223	ABC	0.033	0.944	0.022	ABC	0	1	0	GCB	0.084	0.177	0.739	ABC	0.092	0.74	0.168	ABC	0.066	0.758	0.176	ABC
159	GSM275090	ABC	male	72	5.68	0	ABC	0.535	TypeIII	0.617	0.324	0.059	ABC	0	1	0	ABC	0	1	0	TypeIII	0.667	0	0.333	ABC	0.081	0.904	0.015	TypeIII	0.678	0.237	0.086	ABC	0	1	0	GCB	0.043	0.016	0.941	ABC	0.245	0.569	0.186	ABC	0.242	0.518	0.24	ABC
211	GSM275286	ABC	female	72	4.23	0	ABC	0.533	ABC	0	1	0	ABC	0.058	0.923	0.019	ABC	0	1	0	GCB	0.009	0.013	0.978	ABC	0.009	0.752	0.239	ABC	0.033	0.944	0.022	ABC	0	1	0	ABC	0.086	0.803	0.112	ABC	0.05	0.7	0.249	ABC	0.051	0.651	0.297	ABC
193	GSM275165	ABC	female	86	1.63	0	ABC	0.527	ABC	0.04	0.96	0	TypeIII	1	0	0	ABC	0.225	0.775	0	GCB	0.009	0.013	0.978	ABC	0.144	0.846	0.011	ABC	0.273	0.396	0.332	TypeIII	1	0	0	ABC	0.086	0.803	0.112	ABC	0.301	0.583	0.116	ABC	0.285	0.62	0.095	TypeIII
176	GSM275195	ABC	male	59	1.29	0	ABC	0.524	ABC	0.005	0.995	0	ABC	0	1	0	TypeIII	0.866	0	0.134	ABC	0	0.848	0.152	TypeIII	0.588	0.331	0.081	ABC	0.113	0.869	0.018	ABC	0	1	0	ABC	0.086	0.803	0.112	ABC	0.263	0.582	0.155	ABC	0.286	0.571	0.143	ABC
215	GSM275116	ABC	female	63	0.08	1	ABC	0.509	TypeIII	0.746	0.253	0.001	TypeIII	1	0	0	TypeIII	0.95	0.043	0.007	ABC	0.225	0.775	0	TypeIII	0.508	0.453	0.04	GCB	0.319	0.164	0.517	TypeIII	1	0	0	ABC	0.086	0.803	0.112	ABC	0.454	0.476	0.071	TypeIII	0.481	0.447	0.072	TypeIII
104	GSM275280	GCB	female	36	5.15	0	ABC	0.472	ABC	0.095	0.905	0.001	ABC	0.058	0.923	0.019	GCB	0.319	0.015	0.666	ABC	0	0.848	0.152	GCB	0.091	0.249	0.661	ABC	0.108	0.877	0.015	TypeIII	1	0	0	ABC	0.086	0.803	0.112	ABC	0.18	0.46	0.36	ABC	0.169	0.474	0.357	ABC
168	GSM275249	ABC	male	65	4.2	0	ABC	0.458	ABC	0.017	0.983	0	ABC	0.058	0.923	0.019	TypeIII	0.986	0.014	0	TypeIII	0.881	0	0.119	ABC	0.123	0.696	0.182	ABC	0.226	0.533	0.241	TypeIII	1	0	0	GCB	0.084	0.177	0.739	ABC	0.305	0.471	0.224	ABC	0.303	0.491	0.206	ABC
17	GSM275106	GCB	male	67	0.86	1	GCB	0.911	GCB	0	0	1	GCB	0.034	0.04	0.927	GCB	0	0	1	GCB	0.009	0.013	0.978	GCB	0.001	0.001	0.998	GCB	0.021	0.021	0.959	GCB	0	0	1	GCB	0.043	0.016	0.941	GCB	0	0	1	GCB	0	0	1	GCB
80	GSM275306	GCB	female	61	0.47	0	GCB	0.911	GCB	0	0	1	GCB	0.034	0.04	0.927	GCB	0	0	1	GCB	0.009	0.013	0.978	GCB	0	0	1	GCB	0	0	1	TypeIII	1	0	0	GCB	0.043	0.016	0.941	GCB	0	0	1	GCB	0	0	1	GCB
57	GSM275103	GCB	male	23	1.6	0	GCB	0.91	GCB	0	0	1	GCB	0.034	0.04	0.927	GCB	0	0	1	GCB	0.009	0.013	0.978	GCB	0.001	0.002	0.997	GCB	0	0	1	GCB	0	0	1	GCB	0.084	0.177	0.739	GCB	0	0	1	GCB	0	0.005	0.995	GCB
58	GSM275234	GCB	male	18	2.44	0	GCB	0.91	GCB	0	0	1	GCB	0.034	0.04	0.927	GCB	0	0	1	GCB	0.009	0.013	0.978	GCB	0.002	0.002	0.997	GCB	0.021	0.021	0.959	GCB	0	0	1	GCB	0.043	0.016	0.941	GCB	0	0	1	GCB	0	0	1	GCB
78	GSM275084	GCB	female	64	6.25	0	GCB	0.909	GCB	0	0	1	GCB	0.034	0.04	0.927	GCB	0	0	1	GCB	0.009	0.013	0.978	GCB	0	0	1	GCB	0.021	0.021	0.959	GCB	0	0	1	GCB	0.043	0.016	0.941	GCB	0	0.01	0.99	GCB	0	0.005	0.995	GCB
89	GSM275164	GCB	female	56	3.29	0	GCB	0.909	GCB	0	0	1	GCB	0.034	0.04	0.927	GCB	0	0	1	GCB	0.009	0.013	0.978	GCB	0.001	0	0.999	GCB	0.021	0.021	0.959	GCB	0	0	1	GCB	0.043	0.016	0.941	GCB	0.007	0	0.993	GCB	0.004	0	0.996	GCB
81	GSM275089	GCB	female	60	4.72	0	GCB	0.908	GCB	0	0	1	GCB	0.034	0.04	0.927	GCB	0	0	1	GCB	0.009	0.013	0.978	GCB	0.002	0	0.998	GCB	0.002	0	0.998	TypeIII	1	0	0	GCB	0.043	0.016	0.941	GCB	0	0.01	0.99	GCB	0.015	0.009	0.976	GCB
83	GSM275092	GCB	female	59	5.06	0	GCB	0.908	GCB	0	0	1	GCB	0.034	0.04	0.927	GCB	0	0	1	GCB	0.009	0.013	0.978	GCB	0.007	0.004	0.989	GCB	0.021	0.021	0.959	GCB	0	0	1	GCB	0.043	0.016	0.941	GCB	0	0	1	GCB	0	0	1	GCB
64	GSM275104	GCB	female	78	0.61	0	GCB	0.908	GCB	0	0	1	GCB	0.034	0.04	0.927	GCB	0	0	1	GCB	0.009	0.013	0.978	GCB	0.003	0	0.996	GCB	0.021	0.021	0.959	GCB	0	0	1	GCB	0.043	0.016	0.941	GCB	0	0.01	0.99	GCB	0.001	0.013	0.985	GCB
67	GSM275211	GCB	female	75	1.88	0	GCB	0.908	GCB	0	0	1	GCB	0.034	0.04	0.927	GCB	0	0	1	GCB	0.009	0.013	0.978	GCB	0.003	0	0.996	GCB	0.021	0.021	0.959	GCB	0	0	1	GCB	0.043	0.016	0.941	GCB	0.01	0	0.99	GCB	0.018	0.002	0.98	GCB
75	GSM275296	GCB	female	68	0.42	0	GCB	0.908	GCB	0	0	1	GCB	0.019	0	0.981	GCB	0	0	1	GCB	0.009	0.013	0.978	GCB	0.001	0	0.999	GCB	0.021	0.021	0.959	GCB	0	0	1	GCB	0.084	0.177	0.739	GCB	0.01	0	0.99	GCB	0.017	0.005	0.978	GCB
56	GSM275230	GCB	male	29	2.06	0	GCB	0.906	GCB	0	0	1	GCB	0.034	0.04	0.927	GCB	0	0	1	GCB	0.009	0.013	0.978	GCB	0	0	0.999	GCB	0.021	0.021	0.959	GCB	0	0	1	GCB	0.043	0.016	0.941	GCB	0.01	0.01	0.98	GCB	0.005	0.005	0.99	GCB
61	GSM275126	GCB	female	83	4.8	0	GCB	0.905	GCB	0	0	1	GCB	0.034	0.04	0.927	GCB	0	0	1	GCB	0.009	0.013	0.978	GCB	0.003	0.01	0.987	GCB	0	0	1	GCB	0	0	1	GCB	0.084	0.177	0.739	GCB	0	0.01	0.99	GCB	0.005	0.005	0.99	GCB
43	GSM275178	GCB	male	47	2.37	0	GCB	0.905	GCB	0	0	1	GCB	0.034	0.04	0.927	GCB	0	0	1	GCB	0.009	0.013	0.978	GCB	0.003	0	0.997	GCB	0.017	0.001	0.982	GCB	0	0	1	GCB	0.043	0.016	0.941	GCB	0.01	0.01	0.98	GCB	0.019	0.005	0.976	GCB
90	GSM275273	GCB	female	56	4.36	0	GCB	0.904	GCB	0	0	1	GCB	0.034	0.04	0.927	GCB	0	0	1	GCB	0.009	0.013	0.978	GCB	0	0	1	GCB	0	0	1	TypeIII	1	0	0	GCB	0.043	0.016	0.941	GCB	0.03	0	0.97	GCB	0.026	0	0.974	GCB
24	GSM275233	GCB	male	62	0.61	1	GCB	0.903	GCB	0	0	1	GCB	0.034	0.04	0.927	GCB	0	0	1	GCB	0.009	0.013	0.978	GCB	0.014	0	0.986	GCB	0.006	0	0.994	TypeIII	1	0	0	GCB	0.043	0.016	0.941	GCB	0.02	0	0.98	GCB	0.015	0	0.985	GCB
26	GSM275117	GCB	male	61	2.78	0	GCB	0.902	GCB	0	0	1	GCB	0.034	0.04	0.927	GCB	0	0	1	GCB	0.009	0.013	0.978	GCB	0.006	0.001	0.993	GCB	0.021	0.021	0.959	GCB	0	0	1	GCB	0.084	0.177	0.739	GCB	0.027	0	0.973	GCB	0.023	0.003	0.974	GCB
8	GSM275180	GCB	male	77	1.76	0	GCB	0.902	GCB	0	0	1	GCB	0.034	0.04	0.927	GCB	0	0	1	GCB	0.009	0.013	0.978	GCB	0.003	0.004	0.992	GCB	0.021	0.021	0.959	GCB	0	0	1	GCB	0.043	0.016	0.941	GCB	0.01	0.02	0.97	GCB	0.017	0.05	0.933	GCB
99	GSM275284	GCB	female	49	1.69	0	GCB	0.902	GCB	0	0	1	GCB	0.034	0.04	0.927	GCB	0	0	1	GCB	0.009	0.013	0.978	GCB	0.004	0.001	0.995	GCB	0.003	0.023	0.974	GCB	0	0	1	GCB	0.084	0.177	0.739	GCB	0.02	0.01	0.97	GCB	0.025	0.005	0.97	GCB
68	GSM275218	GCB	female	75	0.19	0	GCB	0.901	GCB	0	0	1	GCB	0.034	0.04	0.927	GCB	0	0	1	GCB	0.009	0.013	0.978	GCB	0.008	0.001	0.991	GCB	0.021	0.021	0.959	GCB	0	0	1	GCB	0.043	0.016	0.941	GCB	0.017	0.017	0.967	GCB	0.013	0.008	0.979	GCB
102	GSM275283	GCB	female	43	1.65	0	GCB	0.901	GCB	0	0	1	GCB	0.034	0.04	0.927	GCB	0	0	1	GCB	0.009	0.013	0.978	GCB	0.001	0	0.999	GCB	0.003	0	0.997	GCB	0	0	1	GCB	0.043	0.016	0.941	GCB	0	0.04	0.96	GCB	0	0.04	0.96	GCB
59	GSM275099	GCB	female	92	2.12	0	GCB	0.897	GCB	0	0	1	GCB	0.034	0.04	0.927	GCB	0	0	1	GCB	0	0	1	GCB	0	0.016	0.983	GCB	0.041	0.013	0.947	GCB	0	0	1	GCB	0.084	0.177	0.739	GCB	0.02	0.04	0.94	GCB	0.01	0.04	0.95	GCB
32	GSM275108	GCB	male	54	1.7	1	GCB	0.896	GCB	0	0	1	GCB	0.034	0.04	0.927	GCB	0	0	1	GCB	0.009	0.013	0.978	GCB	0.001	0	0.999	GCB	0	0	1	TypeIII	1	0	0	GCB	0.043	0.016	0.941	GCB	0.04	0.019	0.941	GCB	0.033	0.01	0.957	GCB
79	GSM275281	GCB	female	62	0.8	1	GCB	0.896	GCB	0	0	1	GCB	0.034	0.04	0.927	GCB	0	0	1	GCB	0.009	0.013	0.978	GCB	0.01	0.012	0.978	GCB	0.003	0.023	0.974	GCB	0	0	1	GCB	0.043	0.016	0.941	GCB	0.038	0	0.962	GCB	0.034	0.005	0.961	GCB
76	GSM275298	GCB	female	68	0.93	0	GCB	0.896	GCB	0	0	1	GCB	0.034	0.04	0.927	GCB	0	0	1	GCB	0.009	0.013	0.978	GCB	0.019	0.001	0.98	GCB	0	0	1	GCB	0	0	1	GCB	0.201	0.074	0.726	GCB	0.022	0.02	0.958	GCB	0.049	0.026	0.925	GCB
55	GSM275129	GCB	male	35	2.43	0	GCB	0.895	GCB	0	0	1	GCB	0.034	0.04	0.927	GCB	0	0	1	GCB	0.009	0.013	0.978	GCB	0.021	0.002	0.977	GCB	0.021	0.021	0.959	GCB	0	0	1	GCB	0.201	0.074	0.726	GCB	0.04	0	0.96	GCB	0.059	0.025	0.916	GCB
13	GSM275096	GCB	male	72	0.03	1	GCB	0.894	GCB	0	0	1	GCB	0.034	0.04	0.927	GCB	0	0	1	GCB	0.009	0.013	0.978	GCB	0.003	0.014	0.983	GCB	0.021	0.021	0.959	GCB	0	0	1	GCB	0.084	0.177	0.739	GCB	0.02	0.03	0.95	GCB	0.022	0.033	0.946	GCB
100	GSM275295	GCB	female	49	0.8	0	GCB	0.894	GCB	0	0	1	GCB	0.019	0	0.981	GCB	0	0	1	GCB	0.009	0.013	0.978	GCB	0	0	1	GCB	0	0	1	GCB	0	0	1	GCB	0.043	0.016	0.941	GCB	0.05	0.02	0.93	GCB	0.054	0.015	0.931	GCB
98	GSM275276	GCB	female	52	3.78	0	GCB	0.893	GCB	0	0	1	GCB	0.034	0.04	0.927	GCB	0	0	1	GCB	0.009	0.013	0.978	GCB	0.007	0.027	0.966	GCB	0.005	0	0.995	GCB	0	0	1	GCB	0.084	0.177	0.739	GCB	0.01	0.03	0.96	GCB	0.025	0.079	0.896	GCB
103	GSM275107	GCB	female	42	2.81	0	GCB	0.892	GCB	0	0	1	GCB	0.034	0.04	0.927	GCB	0	0	1	GCB	0.009	0.013	0.978	GCB	0.004	0.002	0.994	GCB	0.001	0	0.999	GCB	0	0	1	GCB	0.084	0.177	0.739	GCB	0.04	0.03	0.93	GCB	0.025	0.025	0.95	GCB
50	GSM275251	GCB	male	43	4.36	0	GCB	0.89	GCB	0	0	1	GCB	0.034	0.04	0.927	GCB	0	0	1	GCB	0.009	0.013	0.978	GCB	0.005	0.001	0.995	GCB	0.021	0.021	0.959	GCB	0	0	1	GCB	0.201	0.074	0.726	GCB	0.05	0.03	0.92	GCB	0.03	0.045	0.925	GCB
48	GSM275133	GCB	male	43	1.84	0	GCB	0.889	GCB	0	0	1	ABC	0.058	0.923	0.019	GCB	0	0	1	GCB	0.009	0.013	0.978	GCB	0.01	0.002	0.988	GCB	0	0	1	GCB	0	0	1	GCB	0.084	0.177	0.739	GCB	0.027	0.048	0.924	GCB	0.028	0.069	0.903	ABC
85	GSM275127	GCB	female	58	2.87	0	GCB	0.888	GCB	0	0	1	GCB	0.034	0.04	0.927	GCB	0	0	1	GCB	0.009	0.013	0.978	GCB	0.007	0	0.993	GCB	0.021	0.021	0.959	GCB	0	0	1	GCB	0.201	0.074	0.726	GCB	0.067	0.017	0.917	GCB	0.041	0.02	0.939	GCB
74	GSM275212	GCB	female	69	1.83	0	GCB	0.886	GCB	0	0	1	GCB	0.034	0.04	0.927	GCB	0	0	1	GCB	0.009	0.013	0.978	GCB	0.001	0.001	0.998	GCB	0.021	0.021	0.959	GCB	0	0	1	GCB	0.084	0.177	0.739	GCB	0.024	0.076	0.9	GCB	0.022	0.078	0.9	GCB
53	GSM275250	GCB	male	40	4.34	0	GCB	0.886	GCB	0	0	1	GCB	0.034	0.04	0.927	GCB	0	0	1	GCB	0.009	0.013	0.978	GCB	0.011	0.003	0.986	GCB	0.008	0	0.992	GCB	0	0	1	GCB	0.043	0.016	0.941	GCB	0.036	0.05	0.914	GCB	0.023	0.048	0.929	GCB
44	GSM275134	GCB	male	46	1.7	0	GCB	0.884	GCB	0.002	0	0.998	TypeIII	0.898	0	0.102	GCB	0	0	1	GCB	0.009	0.013	0.978	GCB	0.014	0	0.985	GCB	0.021	0.021	0.959	GCB	0.119	0	0.881	GCB	0.201	0.074	0.726	GCB	0.093	0	0.907	GCB	0.094	0.008	0.898	GCB
33	GSM275156	GCB	male	54	3.46	0	GCB	0.882	GCB	0	0	1	GCB	0	0	1	GCB	0	0	1	GCB	0.009	0.013	0.978	GCB	0.027	0.011	0.962	GCB	0.021	0.021	0.959	GCB	0	0	1	GCB	0.084	0.177	0.739	GCB	0.05	0.03	0.92	GCB	0.054	0.05	0.896	GCB
27	GSM275166	GCB	male	60	5.1	0	GCB	0.881	GCB	0	0	1	GCB	0	0.039	0.961	GCB	0	0	1	GCB	0	0.111	0.889	GCB	0	0	0.999	GCB	0.021	0.021	0.959	GCB	0	0	1	GCB	0.043	0.016	0.941	GCB	0.01	0.019	0.971	GCB	0.014	0.01	0.976	GCB
72	GSM275228	GCB	female	70	0.68	0	GCB	0.881	GCB	0	0	1	GCB	0.034	0.04	0.927	GCB	0	0	1	GCB	0.009	0.013	0.978	GCB	0.013	0.001	0.987	GCB	0.021	0.021	0.959	GCB	0	0	1	GCB	0.201	0.074	0.726	GCB	0.08	0.028	0.892	GCB	0.097	0.03	0.873	GCB
97	GSM275175	GCB	female	53	2.94	0	GCB	0.879	GCB	0	0	1	TypeIII	0.783	0.039	0.179	GCB	0	0	1	GCB	0	0.111	0.889	GCB	0	0	1	GCB	0	0	1	GCB	0	0	1	GCB	0.043	0.016	0.941	GCB	0.039	0	0.961	GCB	0.028	0	0.972	TypeIII
49	GSM275227	GCB	male	43	4.05	0	GCB	0.879	GCB	0	0	1	GCB	0.034	0.04	0.927	GCB	0	0	1	GCB	0.009	0.013	0.978	GCB	0.005	0.056	0.939	GCB	0.021	0.021	0.959	GCB	0	0	1	GCB	0.084	0.177	0.739	GCB	0.039	0.03	0.931	GCB	0.026	0.04	0.934	GCB
70	GSM275193	GCB	female	72	0.38	1	GCB	0.878	GCB	0.002	0	0.998	GCB	0.034	0.04	0.927	GCB	0	0	1	GCB	0.009	0.013	0.978	GCB	0.01	0	0.989	GCB	0.002	0	0.998	GCB	0	0	1	GCB	0.201	0.074	0.726	GCB	0.102	0.02	0.878	GCB	0.085	0.031	0.884	GCB
91	GSM275118	GCB	female	55	5.34	0	GCB	0.877	GCB	0	0	1	GCB	0.034	0.04	0.927	GCB	0	0	1	GCB	0.009	0.013	0.978	GCB	0.008	0.001	0.991	GCB	0.013	0	0.987	GCB	0	0	1	GCB	0.043	0.016	0.941	GCB	0.1	0.027	0.873	GCB	0.122	0.019	0.858	GCB
47	GSM275197	GCB	male	44	1.08	0	GCB	0.876	GCB	0	0	1	GCB	0	0	1	GCB	0	0	1	GCB	0.119	0	0.881	GCB	0.006	0.003	0.991	GCB	0.021	0.021	0.959	GCB	0	0	1	GCB	0.084	0.177	0.739	GCB	0.034	0	0.966	GCB	0.041	0.005	0.954	GCB
6	GSM275213	GCB	male	78	1.61	0	GCB	0.876	GCB	0	0	1	GCB	0.034	0.04	0.927	GCB	0	0	1	GCB	0.009	0.013	0.978	GCB	0	0.012	0.988	GCB	0.045	0.012	0.943	ABC	0	1	0	GCB	0.043	0.016	0.941	GCB	0.048	0.08	0.872	GCB	0.036	0.088	0.876	GCB
16	GSM275087	GCB	male	67	0	1	GCB	0.875	GCB	0	0	1	GCB	0.019	0	0.981	GCB	0	0	1	GCB	0	0	1	GCB	0.005	0.01	0.985	GCB	0.002	0	0.998	GCB	0	0	1	GCB	0.084	0.177	0.739	GCB	0.081	0.07	0.849	GCB	0.089	0.063	0.848	GCB
88	GSM275285	GCB	female	57	5.37	0	GCB	0.875	GCB	0	0	1	GCB	0.034	0.04	0.927	GCB	0	0	1	GCB	0.009	0.013	0.978	GCB	0.006	0.02	0.974	GCB	0	0	1	GCB	0	0	1	GCB	0.084	0.177	0.739	GCB	0.02	0.1	0.88	GCB	0.03	0.075	0.895	GCB
39	GSM275148	GCB	male	49	4.03	0	GCB	0.874	GCB	0	0	1	GCB	0.034	0.04	0.927	GCB	0	0	1	GCB	0.119	0	0.881	GCB	0.009	0.005	0.986	GCB	0.085	0.168	0.747	GCB	0	0	1	GCB	0.084	0.177	0.739	GCB	0.02	0.02	0.96	GCB	0.015	0.02	0.965	GCB
54	GSM275154	GCB	male	36	2.16	0	GCB	0.874	GCB	0	0	1	GCB	0.034	0.04	0.927	GCB	0	0	1	GCB	0.119	0	0.881	GCB	0.003	0	0.997	GCB	0.085	0.168	0.747	GCB	0	0	1	GCB	0.084	0.177	0.739	GCB	0.046	0.005	0.949	GCB	0.062	0.007	0.93	GCB
77	GSM275248	GCB	female	65	4.02	0	GCB	0.874	GCB	0	0	1	GCB	0.034	0.04	0.927	GCB	0	0	1	GCB	0.009	0.013	0.978	GCB	0.052	0.015	0.933	GCB	0.021	0.021	0.959	GCB	0	0	1	GCB	0.043	0.016	0.941	GCB	0.043	0.037	0.92	GCB	0.042	0.027	0.931	GCB
94	GSM275187	GCB	female	54	6.5	0	GCB	0.873	GCB	0	0	1	GCB	0.034	0.04	0.927	GCB	0	0	1	GCB	0.009	0.013	0.978	GCB	0.07	0.001	0.929	GCB	0.017	0	0.983	GCB	0	0	1	GCB	0.043	0.016	0.941	GCB	0.024	0.057	0.92	GCB	0.027	0.038	0.934	GCB
12	GSM275194	GCB	male	73	1.22	0	GCB	0.873	GCB	0	0	1	GCB	0	0	1	GCB	0	0	1	GCB	0.009	0.013	0.978	GCB	0.014	0.02	0.966	GCB	0.003	0.023	0.974	GCB	0	0	1	GCB	0.043	0.016	0.941	GCB	0.06	0.058	0.882	GCB	0.04	0.064	0.896	GCB
82	GSM275158	GCB	female	60	5.2	0	GCB	0.872	GCB	0	0	1	ABC	0.058	0.923	0.019	GCB	0	0	1	GCB	0	0	1	GCB	0.002	0.004	0.994	GCB	0.016	0.001	0.983	GCB	0	0	1	ABC	0.086	0.803	0.112	GCB	0.034	0.138	0.827	GCB	0.065	0.154	0.781	ABC
31	GSM275243	GCB	male	56	3.3	0	GCB	0.871	GCB	0	0	1	GCB	0.034	0.04	0.927	GCB	0	0	1	GCB	0.009	0.013	0.978	GCB	0.002	0.039	0.959	GCB	0	0	1	GCB	0	0	1	GCB	0.084	0.177	0.739	GCB	0.03	0.088	0.882	GCB	0.025	0.092	0.883	GCB
36	GSM275222	GCB	male	52	10.29	0	GCB	0.87	GCB	0	0	1	GCB	0.034	0.04	0.927	GCB	0	0	1	GCB	0.009	0.013	0.978	GCB	0.002	0.014	0.984	GCB	0.125	0.106	0.769	GCB	0	0	1	GCB	0.084	0.177	0.739	GCB	0.037	0.109	0.853	GCB	0.025	0.096	0.878	GCB
15	GSM275288	GCB	male	69	0.5	0	GCB	0.87	GCB	0	0	1	GCB	0.034	0.04	0.927	GCB	0	0	1	GCB	0.119	0	0.881	GCB	0.011	0.009	0.98	GCB	0.021	0.021	0.959	GCB	0	0	1	GCB	0.084	0.177	0.739	GCB	0.04	0.009	0.951	GCB	0.046	0.018	0.936	GCB
37	GSM275253	GCB	male	52	2.69	1	GCB	0.869	GCB	0	0	1	GCB	0.034	0.04	0.927	GCB	0	0	1	GCB	0.009	0.013	0.978	GCB	0.011	0.046	0.943	GCB	0.011	0	0.989	GCB	0	0	1	ABC	0.086	0.803	0.112	GCB	0.024	0.086	0.89	GCB	0.032	0.078	0.89	GCB
1	GSM275292	GCB	male	83	0.74	0	GCB	0.869	GCB	0.001	0	0.999	GCB	0.034	0.04	0.927	GCB	0	0	1	GCB	0.009	0.013	0.978	GCB	0.002	0	0.998	GCB	0	0	1	TypeIII	1	0	0	GCB	0.201	0.074	0.726	GCB	0.11	0.057	0.833	GCB	0.103	0.068	0.829	GCB
42	GSM275114	GCB	male	47	0.51	1	GCB	0.868	GCB	0	0	1	GCB	0.034	0.04	0.927	GCB	0	0	1	GCB	0.119	0	0.881	GCB	0.018	0.019	0.963	GCB	0.021	0.021	0.959	GCB	0	0	1	GCB	0.043	0.016	0.941	GCB	0.04	0	0.96	GCB	0.037	0	0.963	GCB
14	GSM275078	GCB	male	71	4.74	0	GCB	0.865	GCB	0	0	1	TypeIII	0.783	0.039	0.179	GCB	0	0	1	GCB	0.119	0	0.881	GCB	0.026	0.002	0.972	GCB	0.049	0.096	0.855	GCB	0	0	1	GCB	0.084	0.177	0.739	GCB	0.06	0	0.94	GCB	0.064	0.015	0.921	TypeIII
46	GSM275232	GCB	male	46	2.18	0	GCB	0.86	GCB	0	0	1	GCB	0.034	0.04	0.927	GCB	0	0	1	GCB	0.119	0	0.881	GCB	0.019	0.008	0.973	GCB	0.021	0.021	0.959	GCB	0	0	1	GCB	0.043	0.016	0.941	GCB	0.04	0.04	0.92	GCB	0.03	0.028	0.942	GCB
93	GSM275201	GCB	female	55	1.26	1	GCB	0.856	GCB	0	0	1	GCB	0.034	0.04	0.927	GCB	0	0	1	GCB	0.119	0	0.881	GCB	0.004	0	0.996	GCB	0.002	0.053	0.945	TypeIII	1	0	0	GCB	0.043	0.016	0.941	GCB	0.097	0.022	0.881	GCB	0.085	0.023	0.892	GCB
41	GSM275094	GCB	male	48	3.5	0	GCB	0.854	GCB	0	0	1	TypeIII	0.783	0.039	0.179	GCB	0	0	1	GCB	0	0.111	0.889	GCB	0.024	0	0.976	GCB	0.021	0.021	0.959	GCB	0	0	1	GCB	0.201	0.074	0.726	GCB	0.117	0	0.882	GCB	0.133	0.011	0.856	TypeIII
25	GSM275302	GCB	male	62	1.59	0	GCB	0.853	GCB	0	0	1	TypeIII	0.898	0	0.102	GCB	0	0	1	GCB	0.009	0.013	0.978	GCB	0.015	0.007	0.978	GCB	0.001	0	0.999	TypeIII	1	0	0	ABC	0.086	0.803	0.112	GCB	0.117	0.093	0.79	GCB	0.11	0.097	0.792	GCB
20	GSM275303	GCB	male	66	0.65	0	GCB	0.851	GCB	0	0	1	GCB	0.019	0	0.981	GCB	0	0	1	GCB	0.009	0.013	0.978	GCB	0.04	0.006	0.954	GCB	0.064	0.089	0.846	GCB	0	0	1	GCB	0.043	0.016	0.941	GCB	0.182	0.011	0.807	GCB	0.158	0.007	0.835	GCB
23	GSM275147	GCB	male	62	4.04	0	GCB	0.849	GCB	0	0	1	GCB	0.034	0.04	0.927	GCB	0	0	1	GCB	0.009	0.013	0.978	GCB	0.041	0.05	0.909	GCB	0.021	0.021	0.959	GCB	0	0	1	GCB	0.084	0.177	0.739	GCB	0.03	0.126	0.844	GCB	0.028	0.147	0.824	GCB
84	GSM275184	GCB	female	59	0.52	0	GCB	0.844	GCB	0	0	1	GCB	0.034	0.04	0.927	GCB	0	0	1	GCB	0.009	0.013	0.978	GCB	0.032	0.046	0.922	GCB	0.003	0	0.997	GCB	0	0	1	GCB	0.043	0.016	0.941	GCB	0.121	0.071	0.808	GCB	0.096	0.082	0.822	GCB
35	GSM275153	GCB	male	53	5.8	0	GCB	0.843	GCB	0	0	1	TypeIII	0.783	0.039	0.179	GCB	0	0	1	GCB	0	0.111	0.889	GCB	0.004	0.002	0.994	GCB	0.021	0.021	0.959	GCB	0	0	1	GCB	0.201	0.074	0.726	GCB	0.05	0.126	0.824	GCB	0.057	0.142	0.801	TypeIII
124	GSM275239	TypeIII	male	48	2.75	0	GCB	0.843	GCB	0	0.001	0.999	GCB	0.034	0.04	0.927	GCB	0	0	1	GCB	0.009	0.013	0.978	GCB	0.001	0.081	0.918	GCB	0.017	0.001	0.982	ABC	0	1	0	GCB	0.084	0.177	0.739	GCB	0.02	0.17	0.81	GCB	0.03	0.165	0.805	GCB
11	GSM275308	GCB	male	74	0.87	1	GCB	0.843	GCB	0.003	0	0.997	GCB	0.019	0	0.981	GCB	0	0	1	GCB	0.009	0.013	0.978	GCB	0.033	0	0.967	GCB	0	0	1	GCB	0	0	1	GCB	0.043	0.016	0.941	GCB	0.22	0.02	0.76	GCB	0.181	0.015	0.804	GCB
18	GSM275167	GCB	male	66	2.39	0	GCB	0.842	GCB	0.029	0	0.971	TypeIII	0.898	0	0.102	GCB	0	0	1	GCB	0.009	0.013	0.978	GCB	0.063	0.003	0.934	GCB	0.009	0	0.991	TypeIII	1	0	0	GCB	0.201	0.074	0.726	GCB	0.114	0.096	0.791	GCB	0.128	0.074	0.798	GCB
192	GSM275150	ABC	male	23	5.06	0	GCB	0.841	GCB	0.007	0.053	0.94	ABC	0.058	0.923	0.019	GCB	0	0	1	GCB	0.009	0.013	0.978	GCB	0.01	0.089	0.901	GCB	0.061	0.013	0.926	ABC	0	1	0	GCB	0.043	0.016	0.941	GCB	0.05	0.13	0.82	GCB	0.068	0.176	0.756	ABC
9	GSM275113	GCB	male	76	1.59	0	GCB	0.839	GCB	0.001	0	0.999	GCB	0.034	0.04	0.927	GCB	0	0	1	GCB	0.009	0.013	0.978	GCB	0.091	0.007	0.902	GCB	0.021	0.021	0.959	GCB	0	0	1	GCB	0.201	0.074	0.726	GCB	0.14	0.049	0.81	GCB	0.143	0.034	0.823	GCB
106	GSM275220	GCB	female	24	3.67	0	GCB	0.838	GCB	0	0	1	GCB	0.034	0.04	0.927	GCB	0	0	1	GCB	0.119	0	0.881	GCB	0.061	0.014	0.925	TypeIII	0.715	0.088	0.196	GCB	0	0	1	TypeIII	0.855	0.145	0	GCB	0.08	0.04	0.88	GCB	0.074	0.025	0.9	GCB
92	GSM275138	GCB	female	55	2.79	0	GCB	0.836	GCB	0.004	0	0.996	GCB	0.034	0.04	0.927	GCB	0	0	1	GCB	0.119	0	0.881	GCB	0.075	0.003	0.922	TypeIII	0.715	0.088	0.196	GCB	0	0	1	GCB	0.043	0.016	0.941	GCB	0.114	0.01	0.876	GCB	0.122	0.015	0.863	GCB
52	GSM275219	GCB	male	40	5.48	0	GCB	0.836	GCB	0	0	1	GCB	0.034	0.04	0.927	GCB	0	0	1	GCB	0.009	0.013	0.978	GCB	0.011	0.121	0.869	GCB	0.045	0.012	0.943	ABC	0	1	0	ABC	0.086	0.803	0.112	GCB	0.026	0.141	0.833	GCB	0.028	0.135	0.837	GCB
65	GSM275095	GCB	female	77	5.23	0	GCB	0.834	GCB	0.042	0	0.958	TypeIII	0.973	0	0.027	GCB	0	0	1	GCB	0.009	0.013	0.978	GCB	0.084	0.015	0.901	GCB	0.011	0	0.989	TypeIII	1	0	0	ABC	0.086	0.803	0.112	GCB	0.138	0.07	0.791	GCB	0.17	0.071	0.758	TypeIII
45	GSM275144	GCB	male	46	2.8	0	GCB	0.834	GCB	0	0.003	0.997	GCB	0	0.039	0.961	GCB	0	0	1	GCB	0	0.111	0.889	GCB	0	0.068	0.932	GCB	0.019	0.006	0.975	GCB	0	0	1	GCB	0.084	0.177	0.739	GCB	0	0.15	0.85	GCB	0.022	0.181	0.797	GCB
29	GSM275259	GCB	male	59	0.3	0	GCB	0.834	GCB	0	0	1	GCB	0.034	0.04	0.927	GCB	0	0	1	GCB	0.119	0	0.881	GCB	0.066	0.003	0.931	GCB	0.017	0.001	0.982	GCB	0	0	1	GCB	0.043	0.016	0.941	GCB	0.097	0.048	0.856	GCB	0.137	0.032	0.83	GCB
34	GSM275282	GCB	male	54	3.97	0	GCB	0.834	GCB	0	0	1	GCB	0.034	0.04	0.927	GCB	0	0	1	GCB	0	0.111	0.889	GCB	0.032	0.019	0.949	GCB	0.021	0.021	0.959	GCB	0	0	1	GCB	0.084	0.177	0.739	GCB	0.057	0.111	0.832	GCB	0.072	0.098	0.83	GCB
51	GSM275083	GCB	male	41	3.65	0	GCB	0.832	GCB	0	0	1	TypeIII	0.982	0.018	0	GCB	0	0	1	GCB	0.119	0	0.881	GCB	0.032	0.01	0.959	GCB	0.049	0.096	0.855	GCB	0	0	1	GCB	0	0	1	GCB	0.096	0.082	0.822	GCB	0.113	0.068	0.818	TypeIII
3	GSM275263	GCB	male	80	1.31	0	GCB	0.828	GCB	0	0	1	GCB	0.034	0.04	0.927	GCB	0	0	1	GCB	0.009	0.013	0.978	GCB	0.019	0.015	0.966	GCB	0.084	0.001	0.915	GCB	0	0	1	GCB	0.043	0.016	0.941	GCB	0.12	0.177	0.703	GCB	0.12	0.169	0.711	GCB
217	GSM275299	ABC	female	63	1.18	0	GCB	0.825	GCB	0	0	0.999	GCB	0.019	0	0.981	GCB	0	0	1	GCB	0	0.111	0.889	GCB	0.004	0.09	0.905	GCB	0.341	0.021	0.638	GCB	0	0	1	ABC	0.086	0.803	0.112	GCB	0.03	0.13	0.84	GCB	0.05	0.109	0.841	GCB
113	GSM275079	TypeIII	male	69	3.7	0	GCB	0.81	GCB	0	0.004	0.996	GCB	0.034	0.04	0.927	ABC	0	1	0	GCB	0.009	0.013	0.978	GCB	0.012	0.231	0.757	GCB	0.045	0.012	0.943	ABC	0	1	0	GCB	0.084	0.177	0.739	GCB	0.01	0.15	0.84	GCB	0.015	0.155	0.83	GCB
205	GSM275240	ABC	female	75	2.77	0	GCB	0.796	GCB	0	0.056	0.944	GCB	0.034	0.04	0.927	GCB	0	0.037	0.963	GCB	0.009	0.013	0.978	GCB	0.005	0.285	0.71	GCB	0.041	0.013	0.947	ABC	0	1	0	GCB	0.084	0.177	0.739	GCB	0.04	0.13	0.83	GCB	0.02	0.159	0.821	GCB
133	GSM275163	TypeIII	female	77	4.78	0	GCB	0.793	GCB	0.082	0	0.918	TypeIII	0.973	0	0.027	TypeIII	0.733	0.005	0.261	GCB	0.009	0.013	0.978	GCB	0.162	0.077	0.761	GCB	0.242	0.022	0.736	TypeIII	1	0	0	GCB	0.043	0.016	0.941	GCB	0.121	0.11	0.769	GCB	0.146	0.109	0.746	TypeIII
71	GSM275077	GCB	female	71	1.71	0	GCB	0.792	GCB	0	0	1	GCB	0.019	0	0.981	GCB	0	0	1	GCB	0	0.111	0.889	GCB	0.04	0.03	0.931	GCB	0.468	0.005	0.527	GCB	0	0	1	GCB	0.043	0.016	0.941	GCB	0.268	0.05	0.682	GCB	0.266	0.051	0.683	GCB
66	GSM275258	GCB	female	77	2.51	0	GCB	0.789	GCB	0	0	1	GCB	0	0.039	0.961	GCB	0	0	1	GCB	0.119	0	0.881	GCB	0.054	0.074	0.872	GCB	0.021	0.021	0.959	GCB	0	0	1	TypeIII	0.855	0.145	0	GCB	0.133	0.129	0.739	GCB	0.136	0.098	0.766	GCB
28	GSM275085	GCB	male	59	3.52	0	GCB	0.788	GCB	0	0	1	GCB	0	0	1	GCB	0	0	1	GCB	0.009	0.013	0.978	GCB	0.053	0.09	0.857	GCB	0.178	0.093	0.73	GCB	0	0	1	ABC	0.086	0.803	0.112	GCB	0.13	0.221	0.649	GCB	0.113	0.245	0.642	GCB
7	GSM275214	GCB	male	78	2.42	0	GCB	0.787	GCB	0.08	0	0.92	GCB	0.034	0.04	0.927	TypeIII	0.702	0	0.298	GCB	0.009	0.013	0.978	GCB	0.273	0.006	0.722	GCB	0.033	0	0.967	GCB	0	0	1	GCB	0.201	0.074	0.726	GCB	0.102	0.118	0.78	GCB	0.128	0.114	0.759	GCB
62	GSM275146	GCB	female	83	0.38	1	GCB	0.784	GCB	0.048	0	0.952	GCB	0.034	0.04	0.927	GCB	0	0	1	GCB	0.119	0	0.881	GCB	0.074	0.024	0.902	GCB	0.133	0.127	0.74	TypeIII	1	0	0	GCB	0.043	0.016	0.941	GCB	0.295	0.019	0.685	GCB	0.301	0.015	0.684	GCB
60	GSM275287	GCB	female	87	0.53	1	GCB	0.783	GCB	0.213	0.002	0.786	GCB	0.034	0.04	0.927	GCB	0	0	1	GCB	0.009	0.013	0.978	GCB	0.084	0.018	0.898	GCB	0.05	0	0.95	TypeIII	1	0	0	GCB	0.084	0.177	0.739	GCB	0.233	0.176	0.591	GCB	0.215	0.171	0.614	GCB
73	GSM275209	GCB	female	69	3.96	0	GCB	0.763	GCB	0	0	1	GCB	0	0.039	0.961	GCB	0	0	1	GCB	0	0.111	0.889	GCB	0.123	0.05	0.827	GCB	0.021	0.021	0.959	GCB	0	0	1	GCB	0.043	0.016	0.941	GCB	0.185	0.145	0.669	GCB	0.157	0.139	0.703	GCB
95	GSM275270	GCB	female	54	1.41	0	GCB	0.748	GCB	0.006	0	0.994	GCB	0.019	0	0.981	GCB	0	0	1	GCB	0	0.111	0.889	GCB	0.115	0.144	0.741	GCB	0.046	0.001	0.954	ABC	0	1	0	GCB	0.084	0.177	0.739	GCB	0.198	0.105	0.697	GCB	0.198	0.087	0.714	GCB
131	GSM275111	TypeIII	male	17	5.63	0	GCB	0.74	GCB	0.393	0	0.607	GCB	0.034	0.04	0.927	TypeIII	0.576	0.017	0.407	GCB	0.009	0.013	0.978	GCB	0.25	0.079	0.671	GCB	0.009	0	0.991	GCB	0	0	1	GCB	0.201	0.074	0.726	GCB	0.252	0.102	0.646	GCB	0.315	0.141	0.544	GCB
220	GSM275268	ABC	female	55	2.8	0	GCB	0.739	GCB	0.003	0	0.997	ABC	0	0.968	0.032	TypeIII	0.978	0.003	0.019	GCB	0	0.111	0.889	GCB	0.228	0.026	0.746	GCB	0.021	0.021	0.959	GCB	0	0	1	GCB	0.201	0.074	0.726	GCB	0.204	0.142	0.654	GCB	0.229	0.152	0.619	ABC
120	GSM275257	TypeIII	male	58	3.99	0	GCB	0.737	GCB	0.017	0.003	0.98	GCB	0.034	0.04	0.927	GCB	0	0	1	GCB	0.009	0.013	0.978	GCB	0.087	0.185	0.728	GCB	0.242	0.022	0.736	ABC	0	1	0	GCB	0.201	0.074	0.726	GCB	0.109	0.316	0.575	GCB	0.109	0.288	0.604	GCB
112	GSM275145	TypeIII	male	71	3.27	0	GCB	0.735	GCB	0.012	0.446	0.542	GCB	0.034	0.04	0.927	GCB	0.051	0.218	0.731	GCB	0.009	0.013	0.978	GCB	0.041	0.286	0.674	GCB	0.108	0.037	0.856	TypeIII	1	0	0	GCB	0.084	0.177	0.739	GCB	0.21	0.167	0.623	GCB	0.223	0.201	0.575	GCB
22	GSM275182	GCB	male	63	4.36	1	GCB	0.732	ABC	0.342	0.619	0.039	GCB	0.019	0	0.981	ABC	0	1	0	GCB	0	0	1	GCB	0.126	0.212	0.662	TypeIII	0.502	0.16	0.339	ABC	0	1	0	ABC	0.086	0.803	0.112	GCB	0.094	0.306	0.6	GCB	0.095	0.307	0.598	GCB
63	GSM275186	GCB	female	80	3.12	0	GCB	0.726	GCB	0.018	0.002	0.981	GCB	0.034	0.04	0.927	GCB	0.014	0.177	0.808	GCB	0	0	1	GCB	0.146	0.248	0.605	GCB	0.084	0.282	0.634	ABC	0	1	0	GCB	0.043	0.016	0.941	GCB	0.104	0.265	0.631	GCB	0.113	0.239	0.648	GCB
40	GSM275255	GCB	male	49	4.54	0	GCB	0.72	TypeIII	0.677	0	0.323	GCB	0.019	0	0.981	TypeIII	0.764	0.001	0.235	GCB	0.119	0	0.881	GCB	0.409	0.028	0.563	GCB	0.021	0.021	0.959	GCB	0	0	1	GCB	0.043	0.016	0.941	GCB	0.2	0.029	0.771	GCB	0.223	0.034	0.743	GCB
87	GSM275190	GCB	female	57	2.44	0	GCB	0.715	GCB	0.063	0	0.937	GCB	0.019	0	0.981	TypeIII	0.726	0.089	0.185	GCB	0.119	0	0.881	GCB	0.226	0.026	0.748	TypeIII	0.715	0.088	0.196	TypeIII	1	0	0	GCB	0.043	0.016	0.941	GCB	0.414	0.02	0.566	GCB	0.403	0.024	0.573	GCB
121	GSM275191	TypeIII	male	57	2.46	0	GCB	0.707	GCB	0.002	0.004	0.994	GCB	0.034	0.04	0.927	GCB	0.001	0.023	0.976	GCB	0.009	0.013	0.978	ABC	0.021	0.548	0.432	ABC	0.014	0.967	0.019	GCB	0	0	1	GCB	0.084	0.177	0.739	GCB	0.03	0.22	0.75	GCB	0.035	0.24	0.725	GCB
111	GSM275176	TypeIII	male	74	2.72	0	GCB	0.688	TypeIII	0.739	0.027	0.234	GCB	0.019	0	0.981	ABC	0.055	0.842	0.103	GCB	0	0.111	0.889	GCB	0.153	0.123	0.724	GCB	0.017	0.001	0.982	ABC	0	1	0	GCB	0.043	0.016	0.941	GCB	0.316	0.213	0.471	GCB	0.32	0.166	0.514	GCB
10	GSM275294	GCB	male	76	0.98	0	GCB	0.675	TypeIII	0.58	0.324	0.096	GCB	0.034	0.04	0.927	TypeIII	0.689	0.14	0.172	GCB	0.009	0.013	0.978	GCB	0.158	0.253	0.589	TypeIII	0.6	0.267	0.133	ABC	0	1	0	GCB	0.201	0.074	0.726	GCB	0.296	0.237	0.467	GCB	0.291	0.276	0.433	GCB
69	GSM275260	GCB	female	74	2.17	0	GCB	0.651	TypeIII	0.755	0	0.245	TypeIII	0.958	0	0.042	GCB	0.418	0.002	0.581	GCB	0.119	0	0.881	GCB	0.463	0.028	0.509	TypeIII	0.715	0.088	0.196	GCB	0	0	1	GCB	0	0	1	GCB	0.416	0.036	0.548	GCB	0.383	0.049	0.568	TypeIII
101	GSM275266	GCB	female	47	0.55	1	GCB	0.648	TypeIII	0.624	0	0.376	TypeIII	0.958	0	0.042	TypeIII	0.699	0.112	0.189	GCB	0.009	0.013	0.978	GCB	0.253	0.128	0.619	TypeIII	0.715	0.088	0.196	GCB	0	0	1	GCB	0.043	0.016	0.941	GCB	0.27	0.067	0.663	GCB	0.288	0.064	0.647	TypeIII
118	GSM275098	TypeIII	male	60	2.95	0	GCB	0.635	GCB	0	0	1	GCB	0.034	0.04	0.927	GCB	0	0	1	ABC	0	0.838	0.162	GCB	0	0.001	0.998	TypeIII	0.823	0.025	0.152	GCB	0	0	1	GCB	0.201	0.074	0.726	GCB	0.137	0.15	0.713	GCB	0.117	0.174	0.709	ABC
136	GSM275246	TypeIII	female	52	3.96	0	GCB	0.634	TypeIII	0.951	0	0.048	ABC	0	1	0	TypeIII	0.484	0.033	0.483	GCB	0.119	0	0.881	GCB	0.3	0.212	0.488	GCB	0.021	0.021	0.959	TypeIII	1	0	0	GCB	0.043	0.016	0.941	GCB	0.365	0.136	0.499	GCB	0.335	0.14	0.525	ABC
108	GSM275157	TypeIII	male	79	0.23	1	GCB	0.609	ABC	0.38	0.487	0.133	TypeIII	0.898	0	0.102	TypeIII	0.852	0.004	0.144	GCB	0	0.111	0.889	GCB	0.209	0.124	0.667	GCB	0.06	0.051	0.889	TypeIII	1	0	0	GCB	0.084	0.177	0.739	GCB	0.33	0.123	0.547	GCB	0.316	0.177	0.507	GCB
139	GSM275101	TypeIII	female	17	1.92	0	GCB	0.593	ABC	0.003	0.761	0.236	GCB	0.034	0.04	0.927	ABC	0.035	0.965	0	GCB	0.009	0.013	0.978	GCB	0.021	0.487	0.492	GCB	0.007	0.004	0.989	GCB	0	0	1	GCB	0.084	0.177	0.739	GCB	0.151	0.279	0.57	GCB	0.12	0.29	0.59	GCB
86	GSM275137	GCB	female	57	2.85	0	GCB	0.581	GCB	0.012	0.003	0.985	GCB	0.034	0.04	0.927	ABC	0.016	0.984	0	GCB	0.009	0.013	0.978	GCB	0.122	0.26	0.618	ABC	0.06	0.774	0.165	GCB	0	0	1	ABC	0.086	0.803	0.112	GCB	0.235	0.37	0.396	GCB	0.221	0.349	0.43	TypeIII
30	GSM275224	GCB	male	58	0.84	0	GCB	0.574	TypeIII	0.67	0	0.33	GCB	0.034	0.04	0.927	TypeIII	0.857	0.018	0.125	GCB	0.119	0	0.881	TypeIII	0.63	0.035	0.335	GCB	0.085	0.168	0.747	TypeIII	1	0	0	GCB	0.043	0.016	0.941	TypeIII	0.467	0.119	0.414	GCB	0.436	0.097	0.467	GCB
122	GSM275225	TypeIII	male	57	4.42	0	GCB	0.571	TypeIII	0.896	0.003	0.101	TypeIII	0.973	0	0.027	TypeIII	0.739	0.037	0.225	GCB	0.009	0.013	0.978	GCB	0.369	0.145	0.486	TypeIII	0.857	0.012	0.131	TypeIII	1	0	0	GCB	0.043	0.016	0.941	GCB	0.38	0.133	0.487	GCB	0.374	0.134	0.493	TypeIII
5	GSM275149	GCB	male	78	5.37	0	GCB	0.552	GCB	0	0	1	GCB	0.019	0	0.981	GCB	0	0	1	TypeIII	0.805	0.065	0.13	GCB	0.236	0.003	0.762	GCB	0.049	0.096	0.855	GCB	0	0	1	GCB	0.043	0.016	0.941	GCB	0.304	0.047	0.649	GCB	0.293	0.031	0.676	GCB
2	GSM275208	GCB	male	80	2.66	0	GCB	0.537	TypeIII	0.835	0	0.165	GCB	0.019	0	0.981	GCB	0.366	0.188	0.446	GCB	0.119	0	0.881	TypeIII	0.575	0.03	0.395	TypeIII	0.715	0.088	0.196	GCB	0	0	1	GCB	0.043	0.016	0.941	GCB	0.394	0.067	0.539	GCB	0.376	0.066	0.559	GCB
21	GSM275081	GCB	male	63	5.23	0	GCB	0.536	TypeIII	0.968	0	0.032	GCB	0.019	0	0.981	GCB	0.222	0.029	0.749	TypeIII	0.667	0	0.333	GCB	0.343	0.083	0.574	GCB	0.017	0.001	0.982	ABC	0	1	0	GCB	0.043	0.016	0.941	GCB	0.335	0.094	0.571	GCB	0.347	0.101	0.552	GCB
19	GSM275170	GCB	male	66	3.88	0	GCB	0.511	GCB	0.12	0	0.88	GCB	0.034	0.04	0.927	TypeIII	0.841	0.033	0.126	GCB	0.119	0	0.881	TypeIII	0.671	0.136	0.193	TypeIII	0.715	0.088	0.196	TypeIII	1	0	0	GCB	0.043	0.016	0.941	GCB	0.298	0.065	0.637	GCB	0.33	0.083	0.587	GCB
107	GSM275264	GCB	female	22	1.4	0	GCB	0.506	TypeIII	0.766	0	0.234	TypeIII	0.958	0	0.042	TypeIII	0.945	0	0.055	GCB	0.119	0	0.881	TypeIII	0.881	0.02	0.099	TypeIII	0.955	0.026	0.019	GCB	0	0	1	GCB	0.043	0.016	0.941	GCB	0.261	0.028	0.712	GCB	0.31	0.024	0.666	TypeIII
116	GSM275124	TypeIII	male	62	1.48	0	GCB	0.505	GCB	0.116	0.029	0.855	GCB	0	0	1	GCB	0	0	1	ABC	0.096	0.904	0	GCB	0.031	0.256	0.713	GCB	0.045	0.012	0.943	ABC	0	1	0	GCB	0.084	0.177	0.739	GCB	0.06	0.298	0.642	GCB	0.086	0.289	0.626	GCB
208	GSM275261	ABC	female	74	0.72	0	GCB	0.491	GCB	0.011	0	0.988	GCB	0.034	0.04	0.927	ABC	0	1	0	GCB	0.009	0.013	0.978	ABC	0.047	0.727	0.226	GCB	0.242	0.022	0.736	ABC	0	1	0	ABC	0.086	0.803	0.112	GCB	0.2	0.372	0.428	GCB	0.224	0.372	0.404	ABC
96	GSM275102	GCB	female	53	1.63	0	GCB	0.469	GCB	0.018	0	0.982	ABC	0.058	0.923	0.019	GCB	0	0	1	ABC	0.016	0.984	0	GCB	0.179	0.123	0.698	TypeIII	0.563	0.17	0.267	GCB	0	0	1	ABC	0.086	0.803	0.112	GCB	0.228	0.261	0.511	GCB	0.186	0.299	0.516	ABC
119	GSM275105	TypeIII	male	59	2.23	0	TypeIII	0.891	TypeIII	1	0	0	TypeIII	0.973	0	0.027	TypeIII	1	0	0	TypeIII	0.993	0.007	0	TypeIII	1	0	0	TypeIII	0.986	0.009	0.004	TypeIII	1	0	0	TypeIII	0.908	0	0.092	TypeIII	0.904	0.08	0.016	TypeIII	0.896	0.086	0.018	TypeIII
128	GSM275223	TypeIII	male	36	8.89	0	TypeIII	0.865	TypeIII	1	0	0	ABC	0	1	0	TypeIII	0.98	0.001	0.018	TypeIII	0.993	0.007	0	TypeIII	0.985	0.007	0.008	TypeIII	0.986	0.009	0.004	TypeIII	1	0	0	GCB	0	0	1	TypeIII	0.814	0.13	0.057	TypeIII	0.785	0.141	0.074	ABC
144	GSM275183	ABC	male	84	0.03	1	TypeIII	0.864	TypeIII	1	0	0	TypeIII	0.982	0.018	0	TypeIII	0.99	0.009	0.001	TypeIII	0.993	0.007	0	TypeIII	0.967	0.028	0.005	TypeIII	0.986	0.009	0.004	TypeIII	1	0	0	TypeIII	0.908	0	0.092	TypeIII	0.831	0.151	0.019	TypeIII	0.798	0.175	0.028	TypeIII
130	GSM275173	TypeIII	male	21	0.4	1	TypeIII	0.861	TypeIII	1	0	0	TypeIII	0.973	0	0.027	TypeIII	0.568	0.425	0.007	TypeIII	0.993	0.007	0	TypeIII	0.896	0.091	0.013	TypeIII	0.703	0.107	0.19	TypeIII	1	0	0	TypeIII	0.855	0.145	0	TypeIII	0.888	0.071	0.041	TypeIII	0.858	0.047	0.096	TypeIII
129	GSM275244	TypeIII	male	23	3.37	0	TypeIII	0.844	TypeIII	1	0	0	TypeIII	0.973	0	0.027	TypeIII	0.96	0.007	0.034	TypeIII	0.993	0.007	0	TypeIII	0.966	0.013	0.022	TypeIII	0.986	0.009	0.004	TypeIII	1	0	0	TypeIII	0.908	0	0.092	TypeIII	0.75	0.057	0.193	TypeIII	0.734	0.088	0.177	TypeIII
160	GSM275198	ABC	male	72	2.24	1	TypeIII	0.836	TypeIII	0.977	0.023	0	TypeIII	0.973	0	0.027	TypeIII	0.76	0.239	0.001	TypeIII	0.993	0.007	0	TypeIII	0.886	0.109	0.005	TypeIII	0.986	0.009	0.004	TypeIII	1	0	0	TypeIII	0.855	0.145	0	TypeIII	0.799	0.198	0.003	TypeIII	0.765	0.219	0.016	TypeIII
178	GSM275274	ABC	male	57	1.05	1	TypeIII	0.833	TypeIII	0.997	0	0.003	TypeIII	0.982	0.018	0	TypeIII	1	0	0	TypeIII	0.993	0.007	0	TypeIII	0.988	0.012	0	TypeIII	0.986	0.009	0.004	TypeIII	1	0	0	TypeIII	0.855	0.145	0	TypeIII	0.684	0.296	0.02	TypeIII	0.682	0.263	0.055	TypeIII
117	GSM275254	TypeIII	male	62	3.88	1	TypeIII	0.828	TypeIII	0.99	0	0.01	GCB	0.034	0.04	0.927	TypeIII	0.908	0.008	0.084	TypeIII	0.993	0.007	0	TypeIII	0.924	0.017	0.059	TypeIII	0.986	0.009	0.004	TypeIII	1	0	0	TypeIII	0.908	0	0.092	TypeIII	0.73	0.08	0.19	TypeIII	0.725	0.079	0.196	GCB
38	GSM275265	GCB	male	52	1.16	1	TypeIII	0.812	TypeIII	0.995	0.001	0.005	TypeIII	0.982	0.018	0	TypeIII	0.978	0.01	0.012	TypeIII	0.993	0.007	0	TypeIII	0.996	0.002	0.002	TypeIII	0.703	0.107	0.19	TypeIII	1	0	0	TypeIII	0.908	0	0.092	TypeIII	0.591	0.146	0.264	TypeIII	0.578	0.173	0.249	TypeIII
125	GSM275200	TypeIII	male	40	3.3	0	TypeIII	0.803	TypeIII	0.994	0.001	0.005	TypeIII	0.973	0	0.027	TypeIII	0.411	0.33	0.259	TypeIII	1	0	0	TypeIII	0.753	0.076	0.171	ABC	0.075	0.922	0.003	TypeIII	1	0	0	GCB	0.201	0.074	0.726	TypeIII	0.791	0.07	0.139	TypeIII	0.769	0.099	0.132	TypeIII
132	GSM275110	TypeIII	female	79	0.19	1	TypeIII	0.797	TypeIII	0.999	0	0.001	TypeIII	0.973	0	0.027	GCB	0.399	0.025	0.576	TypeIII	0.993	0.007	0	TypeIII	0.839	0.085	0.076	TypeIII	0.987	0.001	0.012	TypeIII	1	0	0	TypeIII	0.908	0	0.092	TypeIII	0.69	0.104	0.206	TypeIII	0.676	0.104	0.221	TypeIII
179	GSM275304	ABC	male	56	0.46	1	TypeIII	0.79	TypeIII	0.951	0.048	0	TypeIII	0.982	0.018	0	TypeIII	0.737	0.262	0.001	TypeIII	0.993	0.007	0	TypeIII	0.846	0.14	0.014	TypeIII	0.986	0.009	0.004	TypeIII	1	0	0	TypeIII	0.855	0.145	0	TypeIII	0.652	0.225	0.122	TypeIII	0.649	0.228	0.123	TypeIII
198	GSM275086	ABC	female	79	2.71	0	TypeIII	0.782	TypeIII	0.999	0	0	TypeIII	0.973	0	0.027	TypeIII	0.928	0.071	0.001	TypeIII	0.993	0.007	0	TypeIII	0.791	0.196	0.013	TypeIII	0.53	0.256	0.215	ABC	0	1	0	TypeIII	0.855	0.145	0	TypeIII	0.676	0.278	0.045	TypeIII	0.666	0.256	0.078	TypeIII
202	GSM275278	ABC	female	76	4.01	0	TypeIII	0.765	TypeIII	0.846	0.154	0	TypeIII	0.982	0.018	0	TypeIII	0.79	0.209	0.001	TypeIII	0.993	0.007	0	TypeIII	0.703	0.296	0.001	TypeIII	0.986	0.009	0.004	TypeIII	1	0	0	TypeIII	0.855	0.145	0	TypeIII	0.696	0.281	0.023	TypeIII	0.649	0.313	0.038	TypeIII
150	GSM275192	ABC	male	76	2.38	0	TypeIII	0.756	TypeIII	0.841	0.159	0	TypeIII	0.973	0	0.027	ABC	0.238	0.762	0	TypeIII	0.993	0.007	0	TypeIII	0.74	0.257	0.003	TypeIII	0.986	0.009	0.004	TypeIII	1	0	0	TypeIII	0.855	0.145	0	TypeIII	0.626	0.356	0.019	TypeIII	0.64	0.35	0.01	TypeIII
105	GSM275215	GCB	female	28	2.12	0	TypeIII	0.75	TypeIII	1	0	0	TypeIII	0.973	0	0.027	TypeIII	0.952	0.001	0.047	TypeIII	0.993	0.007	0	TypeIII	0.542	0.023	0.435	TypeIII	0.986	0.009	0.004	TypeIII	1	0	0	TypeIII	0.908	0	0.092	TypeIII	0.799	0.031	0.17	TypeIII	0.788	0.04	0.172	TypeIII
196	GSM275159	ABC	female	84	5.51	0	TypeIII	0.744	TypeIII	0.577	0	0.422	TypeIII	1	0	0	TypeIII	0.907	0.042	0.051	TypeIII	1	0	0	TypeIII	0.644	0.322	0.035	TypeIII	0.977	0.022	0.001	TypeIII	1	0	0	TypeIII	0.855	0.145	0	TypeIII	0.666	0.224	0.111	TypeIII	0.666	0.206	0.129	TypeIII
138	GSM275204	TypeIII	female	23	3.36	0	TypeIII	0.728	TypeIII	0.658	0	0.342	TypeIII	0.973	0	0.027	TypeIII	0.851	0.002	0.147	TypeIII	0.993	0.007	0	TypeIII	0.702	0.012	0.286	TypeIII	0.986	0.009	0.004	TypeIII	1	0	0	GCB	0.043	0.016	0.941	TypeIII	0.552	0.041	0.407	TypeIII	0.58	0.029	0.391	TypeIII
197	GSM275181	ABC	female	80	4.55	0	TypeIII	0.718	TypeIII	1	0	0	ABC	0	1	0	TypeIII	0.964	0.026	0.01	TypeIII	0.993	0.007	0	TypeIII	0.539	0.451	0.01	TypeIII	0.977	0.022	0.001	TypeIII	1	0	0	TypeIII	0.855	0.145	0	TypeIII	0.675	0.261	0.063	TypeIII	0.654	0.291	0.055	ABC
135	GSM275262	TypeIII	female	58	1.53	0	TypeIII	0.696	TypeIII	0.99	0	0.009	TypeIII	1	0	0	TypeIII	0.707	0.003	0.291	TypeIII	0.805	0.065	0.13	TypeIII	0.735	0.191	0.074	TypeIII	0.977	0.022	0.001	TypeIII	1	0	0	ABC	0.086	0.803	0.112	TypeIII	0.579	0.168	0.253	TypeIII	0.569	0.172	0.259	TypeIII
123	GSM275210	TypeIII	male	56	1.42	0	TypeIII	0.694	TypeIII	0.968	0.031	0	TypeIII	0.982	0.018	0	TypeIII	0.989	0.01	0.001	TypeIII	0.993	0.007	0	TypeIII	0.84	0.156	0.004	TypeIII	0.986	0.009	0.004	TypeIII	1	0	0	TypeIII	0.855	0.145	0	TypeIII	0.61	0.34	0.05	TypeIII	0.56	0.375	0.065	TypeIII
140	GSM275231	TypeIII	female	17	2.12	0	TypeIII	0.693	TypeIII	0.93	0.04	0.03	TypeIII	0.973	0	0.027	TypeIII	0.947	0.002	0.051	TypeIII	0.881	0	0.119	TypeIII	0.667	0.011	0.322	TypeIII	0.915	0.067	0.018	TypeIII	1	0	0	GCB	0.201	0.074	0.726	TypeIII	0.557	0.115	0.328	TypeIII	0.577	0.106	0.317	TypeIII
127	GSM275202	TypeIII	male	36	5.06	0	TypeIII	0.692	TypeIII	0.999	0	0.001	TypeIII	0.973	0	0.027	TypeIII	0.854	0.007	0.139	TypeIII	0.805	0.065	0.13	TypeIII	0.701	0.119	0.18	TypeIII	0.977	0.022	0.001	GCB	0.346	0	0.654	ABC	0.086	0.803	0.112	TypeIII	0.594	0.231	0.176	TypeIII	0.647	0.178	0.175	TypeIII
173	GSM275115	ABC	male	61	2.95	0	TypeIII	0.689	TypeIII	0.712	0.288	0	TypeIII	0.973	0	0.027	TypeIII	0.965	0.035	0	TypeIII	0.667	0	0.333	TypeIII	0.804	0.185	0.011	GCB	0.242	0.022	0.736	ABC	0	1	0	TypeIII	0.875	0.125	0	TypeIII	0.618	0.282	0.1	TypeIII	0.606	0.296	0.098	TypeIII
174	GSM275152	ABC	male	59	3.07	0	TypeIII	0.607	ABC	0.017	0.98	0.003	TypeIII	0.973	0	0.027	ABC	0.049	0.752	0.199	TypeIII	1	0	0	ABC	0.289	0.434	0.278	TypeIII	0.689	0.309	0.002	ABC	0	1	0	ABC	0.086	0.803	0.112	TypeIII	0.472	0.4	0.128	TypeIII	0.466	0.41	0.124	TypeIII
204	GSM275169	ABC	female	75	1.52	1	TypeIII	0.596	TypeIII	0.999	0	0	TypeIII	0.973	0	0.027	TypeIII	0.971	0.019	0.011	ABC	0.016	0.984	0	TypeIII	0.891	0.053	0.056	TypeIII	0.783	0.163	0.054	TypeIII	1	0	0	TypeIII	0.875	0.125	0	TypeIII	0.812	0.086	0.102	TypeIII	0.815	0.098	0.087	TypeIII
185	GSM275177	ABC	male	49	0.15	1	TypeIII	0.594	TypeIII	1	0	0	ABC	0	1	0	TypeIII	0.628	0.049	0.323	TypeIII	0.993	0.007	0	ABC	0.258	0.633	0.109	TypeIII	0.4	0.356	0.244	ABC	0	1	0	TypeIII	0.855	0.145	0	TypeIII	0.459	0.359	0.182	TypeIII	0.497	0.341	0.162	ABC
4	GSM275082	GCB	male	78	5.12	0	TypeIII	0.592	GCB	0.388	0	0.612	TypeIII	0.973	0	0.027	GCB	0.029	0.002	0.97	TypeIII	0.993	0.007	0	GCB	0.433	0.018	0.549	TypeIII	0.955	0.026	0.019	TypeIII	1	0	0	TypeIII	0.908	0	0.092	TypeIII	0.608	0.022	0.37	TypeIII	0.568	0.023	0.409	TypeIII
115	GSM275301	TypeIII	male	66	1.6	0	TypeIII	0.579	TypeIII	0.996	0	0.004	TypeIII	0.982	0.018	0	TypeIII	0.973	0.002	0.025	GCB	0.119	0	0.881	TypeIII	0.951	0.037	0.012	TypeIII	0.715	0.088	0.196	GCB	0	0	1	GCB	0	0	1	TypeIII	0.58	0.208	0.212	TypeIII	0.562	0.224	0.214	TypeIII
162	GSM275247	ABC	male	71	0.5	1	TypeIII	0.571	TypeIII	0.998	0.002	0	ABC	0.058	0.923	0.019	TypeIII	0.998	0.002	0	ABC	0.016	0.984	0	TypeIII	0.919	0.063	0.018	TypeIII	0.697	0.302	0.001	TypeIII	1	0	0	TypeIII	0.875	0.125	0	TypeIII	0.684	0.225	0.091	TypeIII	0.666	0.254	0.081	ABC
109	GSM275171	TypeIII	male	79	0.61	1	TypeIII	0.553	TypeIII	0.916	0	0.084	TypeIII	0.982	0.018	0	GCB	0	0	1	TypeIII	0.993	0.007	0	GCB	0.353	0.067	0.58	TypeIII	0.986	0.009	0.004	TypeIII	1	0	0	TypeIII	0.908	0	0.092	TypeIII	0.531	0.223	0.246	TypeIII	0.551	0.193	0.256	TypeIII
114	GSM275131	TypeIII	male	67	1.61	0	TypeIII	0.544	TypeIII	0.76	0.063	0.177	TypeIII	0.973	0	0.027	TypeIII	0.676	0.307	0.017	TypeIII	0.881	0	0.119	GCB	0.423	0.109	0.468	GCB	0.032	0	0.968	GCB	0	0	1	GCB	0.084	0.177	0.739	GCB	0.204	0.179	0.617	GCB	0.292	0.204	0.504	TypeIII
126	GSM275245	TypeIII	male	40	3.44	0	TypeIII	0.52	TypeIII	0.995	0	0.005	ABC	0.058	0.923	0.019	TypeIII	0.988	0.001	0.011	GCB	0.009	0.013	0.978	TypeIII	0.823	0.159	0.018	TypeIII	0.903	0.056	0.042	TypeIII	1	0	0	GCB	0.201	0.074	0.726	TypeIII	0.58	0.206	0.214	TypeIII	0.55	0.278	0.172	ABC
214	GSM275093	ABC	female	63	4.86	0	TypeIII	0.481	TypeIII	0.987	0.012	0.002	TypeIII	1	0	0	TypeIII	0.995	0	0.004	ABC	0	0.848	0.152	TypeIII	0.809	0.131	0.06	TypeIII	0.825	0.173	0.002	ABC	0	1	0	TypeIII	0.875	0.125	0	TypeIII	0.448	0.441	0.11	TypeIII	0.443	0.427	0.13	TypeIII
231	GSM275305	ABC	female	42	1.21	1	TypeIII	0.472	ABC	0.155	0.845	0	TypeIII	1	0	0	TypeIII	0.904	0.091	0.005	TypeIII	0.667	0	0.333	ABC	0.414	0.521	0.066	TypeIII	0.977	0.022	0.001	ABC	0	1	0	TypeIII	0.875	0.125	0	TypeIII	0.475	0.456	0.069	ABC	0.418	0.533	0.05	TypeIII
218	GSM275162	ABC	female	61	5.16	0	TypeIII	0.466	ABC	0.384	0.611	0.005	ABC	0.058	0.923	0.019	TypeIII	0.852	0.002	0.145	ABC	0.016	0.984	0	TypeIII	0.664	0.159	0.177	TypeIII	0.6	0.267	0.133	TypeIII	1	0	0	TypeIII	0.875	0.125	0	TypeIII	0.518	0.193	0.29	TypeIII	0.473	0.263	0.264	ABC
[truncated: 89 more columns]

## Sheet: GSE12195
		WRIGHT TRAINED
OriginalOrder	Sample	ClassLMT_J48_RF100_SMO	MaxConf	TypeIII	ABC	GCB
9	GSM306894	ABC	0.892	0.108	0.892	0
67	GSM387574	ABC	0.876	0.098	0.876	0.026
19	GSM306905	ABC	0.874	0.105	0.874	0.021
4	GSM306889	ABC	0.844	0.102	0.844	0.054
37	GSM306924	ABC	0.828	0.133	0.828	0.039
15	GSM306900	ABC	0.818	0.133	0.818	0.05
24	GSM306910	ABC	0.816	0.116	0.816	0.068
50	GSM306938	ABC	0.792	0.187	0.792	0.02
5	GSM306890	ABC	0.791	0.154	0.791	0.055
14	GSM306899	ABC	0.779	0.166	0.779	0.055
41	GSM306928	ABC	0.777	0.206	0.777	0.017
17	GSM306903	ABC	0.757	0.013	0.757	0.229
3	GSM306888	ABC	0.751	0.197	0.751	0.052
71	GSM387578	ABC	0.749	0.159	0.749	0.092
26	GSM306912	ABC	0.739	0.211	0.739	0.05
61	GSM387568	ABC	0.692	0.253	0.692	0.055
18	GSM306904	ABC	0.669	0.331	0.669	0.001
8	GSM306893	ABC	0.665	0.288	0.665	0.047
64	GSM387571	ABC	0.663	0.249	0.663	0.088
55	GSM306947	ABC	0.651	0.113	0.651	0.236
60	GSM387567	ABC	0.65	0.283	0.65	0.067
57	GSM306949	ABC	0.578	0.133	0.578	0.288
29	GSM306915	ABC	0.544	0.084	0.544	0.372
72	GSM387579	ABC	0.539	0.254	0.539	0.207
39	GSM306926	ABC	0.527	0.365	0.527	0.108
2	GSM306887	ABC	0.492	0.048	0.492	0.46
56	GSM306948	ABC	0.478	0.42	0.478	0.102
63	GSM387570	ABC	0.44	0.278	0.44	0.282
73	GSM387580	GCB	0.911	0.086	0.004	0.911
62	GSM387569	GCB	0.907	0.09	0.003	0.907
30	GSM306916	GCB	0.904	0.092	0.004	0.904
42	GSM306930	GCB	0.904	0.089	0.007	0.904
32	GSM306919	GCB	0.899	0.09	0.011	0.899
47	GSM306935	GCB	0.897	0.006	0.097	0.897
58	GSM387565	GCB	0.896	0.007	0.097	0.896
65	GSM387572	GCB	0.894	0.009	0.097	0.894
46	GSM306934	GCB	0.884	0.111	0.004	0.884
16	GSM306902	GCB	0.882	0.091	0.027	0.882
11	GSM306896	GCB	0.879	0.121	0	0.879
6	GSM306891	GCB	0.874	0.007	0.119	0.874
31	GSM306918	GCB	0.865	0.023	0.112	0.865
52	GSM306940	GCB	0.862	0.135	0.003	0.862
68	GSM387575	GCB	0.861	0.135	0.004	0.861
34	GSM306921	GCB	0.859	0.109	0.032	0.859
54	GSM306946	GCB	0.847	0.151	0.003	0.847
23	GSM306909	GCB	0.841	0.133	0.026	0.841
45	GSM306933	GCB	0.84	0.112	0.048	0.84
43	GSM306931	GCB	0.839	0.161	0	0.839
59	GSM387566	GCB	0.83	0.156	0.013	0.83
69	GSM387576	GCB	0.825	0.162	0.013	0.825
53	GSM306944	GCB	0.818	0.18	0.003	0.818
13	GSM306898	GCB	0.783	0.217	0	0.783
25	GSM306911	GCB	0.757	0.229	0.014	0.757
40	GSM306927	GCB	0.75	0.218	0.032	0.75
49	GSM306937	GCB	0.742	0.249	0.009	0.742
35	GSM306922	GCB	0.724	0.266	0.01	0.724
12	GSM306897	GCB	0.712	0.214	0.074	0.712
20	GSM306906	GCB	0.678	0.038	0.284	0.678
27	GSM306913	GCB	0.626	0.33	0.044	0.626
36	GSM306923	GCB	0.618	0.375	0.007	0.618
44	GSM306932	GCB	0.61	0.017	0.373	0.61
1	GSM306886	GCB	0.597	0.39	0.013	0.597
22	GSM306908	GCB	0.547	0.015	0.438	0.547
33	GSM306920	GCB	0.53	0.468	0.002	0.53
51	GSM306939	GCB	0.487	0.063	0.45	0.487
7	GSM306892	TypeIII	0.825	0.825	0.014	0.161
28	GSM306914	TypeIII	0.731	0.731	0.11	0.158
70	GSM387577	TypeIII	0.603	0.603	0.081	0.317
21	GSM306907	TypeIII	0.523	0.523	0.021	0.457
38	GSM306925	TypeIII	0.512	0.512	0.461	0.027
10	GSM306895	TypeIII	0.486	0.486	0.397	0.117
66	GSM387573	TypeIII	0.485	0.485	0.054	0.461
48	GSM306936	TypeIII	0.419	0.419	0.378	0.203

## Sheet: GSE19246
			WRIGHT TRAINED
OriginalOrder	GEO_Class	Sample	ClassLMT_J48_RF100_SMO	MaxConf	TypeIII	ABC	GCB
117	ABC	GSM477011	ABC	0.898	0.099	0.898	0.003
114	ABC	GSM477004	ABC	0.892	0.106	0.892	0.003
109	ABC	GSM476990	ABC	0.875	0.112	0.875	0.013
112	ABC	GSM476999	ABC	0.853	0.147	0.853	0.001
110	ABC	GSM476993	ABC	0.85	0.147	0.85	0.003
106	ABC	GSM476979	ABC	0.832	0.16	0.832	0.008
115	ABC	GSM477005	ABC	0.831	0.136	0.831	0.032
85	ABC	GSM476928	ABC	0.827	0.156	0.827	0.016
89	ABC	GSM476934	ABC	0.824	0.044	0.824	0.132
105	ABC	GSM476976	ABC	0.82	0.122	0.82	0.058
108	ABC	GSM476982	ABC	0.82	0.117	0.82	0.063
86	ABC	GSM476929	ABC	0.803	0.169	0.803	0.028
96	ABC	GSM476951	ABC	0.801	0.174	0.801	0.025
93	ABC	GSM476947	ABC	0.792	0.077	0.792	0.131
99	ABC	GSM476956	ABC	0.792	0.188	0.792	0.02
100	ABC	GSM476959	ABC	0.788	0.202	0.788	0.01
107	ABC	GSM476981	ABC	0.781	0.181	0.781	0.038
90	ABC	GSM476941	ABC	0.778	0.179	0.778	0.044
98	ABC	GSM476955	ABC	0.732	0.251	0.732	0.017
118	ABC	GSM477013	ABC	0.698	0.284	0.698	0.018
84	ABC	GSM476924	ABC	0.693	0.223	0.693	0.084
101	ABC	GSM476963	ABC	0.668	0.273	0.668	0.059
87	ABC	GSM476930	ABC	0.64	0.213	0.64	0.147
94	ABC	GSM476949	ABC	0.617	0.284	0.617	0.099
40	GCB	GSM476985	ABC	0.605	0.216	0.605	0.179
102	ABC	GSM476966	ABC	0.578	0.1	0.578	0.322
79	ABC	GSM476903	ABC	0.545	0.307	0.545	0.148
91	ABC	GSM476942	ABC	0.537	0.252	0.537	0.211
80	ABC	GSM476906	ABC	0.526	0.076	0.526	0.398
46	GCB	GSM476994	ABC	0.525	0.117	0.525	0.358
92	ABC	GSM476946	ABC	0.513	0.131	0.513	0.356
83	ABC	GSM476915	ABC	0.504	0.217	0.504	0.279
78	ABC	GSM476897	ABC	0.502	0.337	0.502	0.161
75	TypeIII	GSM477002	ABC	0.497	0.302	0.497	0.201
73	TypeIII	GSM476989	ABC	0.484	0.039	0.484	0.477
77	ABC	GSM476896	ABC	0.481	0.064	0.481	0.455
71	TypeIII	GSM476980	ABC	0.452	0.301	0.452	0.247
27	GCB	GSM476954	GCB	0.911	0.086	0.003	0.911
24	GCB	GSM476944	GCB	0.909	0.086	0.006	0.909
26	GCB	GSM476952	GCB	0.908	0.086	0.006	0.908
9	GCB	GSM476914	GCB	0.906	0.005	0.089	0.906
14	GCB	GSM476922	GCB	0.905	0.087	0.008	0.905
19	GCB	GSM476933	GCB	0.905	0.092	0.003	0.905
10	GCB	GSM476918	GCB	0.903	0.091	0.006	0.903
13	GCB	GSM476921	GCB	0.903	0.088	0.008	0.903
23	GCB	GSM476939	GCB	0.901	0.086	0.013	0.901
11	GCB	GSM476919	GCB	0.897	0.086	0.017	0.897
2	GCB	GSM476899	GCB	0.894	0.1	0.007	0.894
21	GCB	GSM476937	GCB	0.891	0.09	0.019	0.891
12	GCB	GSM476920	GCB	0.888	0.09	0.023	0.888
22	GCB	GSM476938	GCB	0.885	0.111	0.004	0.885
6	GCB	GSM476909	GCB	0.879	0.093	0.028	0.879
42	GCB	GSM476987	GCB	0.878	0.007	0.115	0.878
17	GCB	GSM476926	GCB	0.877	0.103	0.019	0.877
18	GCB	GSM476927	GCB	0.876	0.098	0.027	0.876
41	GCB	GSM476986	GCB	0.874	0.091	0.036	0.874
33	GCB	GSM476972	GCB	0.873	0.095	0.031	0.873
48	GCB	GSM476998	GCB	0.872	0.104	0.024	0.872
52	GCB	GSM477007	GCB	0.872	0.128	0	0.872
16	GCB	GSM476925	GCB	0.871	0.091	0.038	0.871
29	GCB	GSM476962	GCB	0.869	0.101	0.03	0.869
25	GCB	GSM476948	GCB	0.867	0.13	0.003	0.867
15	GCB	GSM476923	GCB	0.865	0.114	0.02	0.865
50	GCB	GSM477001	GCB	0.862	0.118	0.02	0.862
55	TypeIII	GSM476902	GCB	0.855	0.025	0.12	0.855
53	GCB	GSM477008	GCB	0.852	0.14	0.008	0.852
3	GCB	GSM476900	GCB	0.847	0.109	0.044	0.847
5	GCB	GSM476908	GCB	0.846	0.039	0.114	0.846
63	TypeIII	GSM476940	GCB	0.845	0.144	0.011	0.845
28	GCB	GSM476961	GCB	0.84	0.02	0.14	0.84
8	GCB	GSM476913	GCB	0.832	0.134	0.034	0.832
38	GCB	GSM476978	GCB	0.826	0.141	0.033	0.826
51	GCB	GSM477006	GCB	0.82	0.019	0.161	0.82
7	GCB	GSM476912	GCB	0.815	0.17	0.015	0.815
65	TypeIII	GSM476945	GCB	0.794	0.136	0.07	0.794
31	GCB	GSM476969	GCB	0.792	0.191	0.017	0.792
4	GCB	GSM476901	GCB	0.782	0.18	0.039	0.782
37	GCB	GSM476977	GCB	0.778	0.172	0.049	0.778
60	TypeIII	GSM476917	GCB	0.772	0.162	0.066	0.772
44	GCB	GSM476991	GCB	0.765	0.171	0.064	0.765
47	GCB	GSM476995	GCB	0.759	0.201	0.039	0.759
39	GCB	GSM476984	GCB	0.716	0.27	0.014	0.716
30	GCB	GSM476965	GCB	0.71	0.217	0.073	0.71
45	GCB	GSM476992	GCB	0.66	0.301	0.038	0.66
34	GCB	GSM476973	GCB	0.65	0.322	0.028	0.65
36	GCB	GSM476975	GCB	0.62	0.26	0.119	0.62
58	TypeIII	GSM476910	GCB	0.617	0.338	0.045	0.617
20	GCB	GSM476936	GCB	0.601	0.337	0.062	0.601
62	TypeIII	GSM476935	GCB	0.589	0.372	0.039	0.589
81	ABC	GSM476907	GCB	0.573	0.143	0.284	0.573
1	GCB	GSM476898	GCB	0.552	0.049	0.4	0.552
59	TypeIII	GSM476916	GCB	0.542	0.035	0.423	0.542
54	GCB	GSM477010	GCB	0.53	0.198	0.272	0.53
61	TypeIII	GSM476931	GCB	0.518	0.087	0.395	0.518
69	TypeIII	GSM476964	GCB	0.48	0.239	0.281	0.48
35	GCB	GSM476974	GCB	0.451	0.263	0.286	0.451
97	ABC	GSM476953	GCB	0.451	0.24	0.309	0.451
56	TypeIII	GSM476904	TypeIII	0.878	0.878	0.012	0.11
76	TypeIII	GSM477012	TypeIII	0.859	0.859	0.128	0.013
64	TypeIII	GSM476943	TypeIII	0.824	0.824	0.026	0.149
95	ABC	GSM476950	TypeIII	0.807	0.807	0.027	0.166
74	TypeIII	GSM476997	TypeIII	0.794	0.794	0.082	0.124
116	ABC	GSM477009	TypeIII	0.787	0.787	0.188	0.025
103	ABC	GSM476967	TypeIII	0.739	0.739	0.236	0.025
88	ABC	GSM476932	TypeIII	0.736	0.736	0.176	0.088
43	GCB	GSM476988	TypeIII	0.666	0.666	0.074	0.26
111	ABC	GSM476996	TypeIII	0.647	0.647	0.34	0.013
49	GCB	GSM477000	TypeIII	0.643	0.643	0.037	0.319
70	TypeIII	GSM476971	TypeIII	0.607	0.607	0.138	0.255
104	ABC	GSM476968	TypeIII	0.596	0.596	0.393	0.01
82	ABC	GSM476911	TypeIII	0.592	0.592	0.118	0.29
32	GCB	GSM476970	TypeIII	0.584	0.584	0.017	0.4
66	TypeIII	GSM476957	TypeIII	0.583	0.583	0.151	0.266
57	TypeIII	GSM476905	TypeIII	0.58	0.58	0.048	0.372
67	TypeIII	GSM476958	TypeIII	0.538	0.538	0.358	0.104
113	ABC	GSM477003	TypeIII	0.521	0.521	0.392	0.086
68	TypeIII	GSM476960	TypeIII	0.492	0.492	0.185	0.323
72	TypeIII	GSM476983	TypeIII	0.439	0.439	0.147	0.413

## Sheet: GSE22470
			WRIGHT TRAINED
OriginalOrder	GEO_Class	Sample	ClassLMT_J48_RF100_SMO	MaxConf	TypeIII	ABC	GCB
49	ABC	GSM558167	ABC	0.9	0.093	0.9	0.006
101	ABC	GSM558219	ABC	0.898	0.095	0.898	0.007
192	ABC	GSM558310	ABC	0.898	0.093	0.898	0.009
47	ABC	GSM558165	ABC	0.897	0.092	0.897	0.011
44	ABC	GSM558162	ABC	0.895	0.09	0.895	0.015
208	ABC	GSM558326	ABC	0.895	0.088	0.895	0.017
259	ABC	GSM558377	ABC	0.892	0.097	0.892	0.011
62	ABC	GSM558180	ABC	0.884	0.104	0.884	0.012
226	ABC	GSM558344	ABC	0.884	0.107	0.884	0.009
117	ABC	GSM558235	ABC	0.875	0.109	0.875	0.016
52	ABC	GSM558170	ABC	0.863	0.097	0.863	0.04
79	ABC	GSM558197	ABC	0.862	0.107	0.862	0.031
27	ABC	GSM558145	ABC	0.857	0.116	0.857	0.028
151	ABC	GSM558269	ABC	0.857	0.133	0.857	0.01
130	ABC	GSM558248	ABC	0.856	0.1	0.856	0.043
63	TypeIII	GSM558181	ABC	0.853	0.135	0.853	0.012
73	ABC	GSM558191	ABC	0.847	0.143	0.847	0.009
7	ABC	GSM558125	ABC	0.843	0.132	0.843	0.024
88	ABC	GSM558206	ABC	0.839	0.134	0.839	0.027
10	ABC	GSM558128	ABC	0.833	0.126	0.833	0.041
67	ABC	GSM558185	ABC	0.83	0.119	0.83	0.05
120	ABC	GSM558238	ABC	0.826	0.11	0.826	0.064
269	ABC	GSM558387	ABC	0.826	0.161	0.826	0.013
3	ABC	GSM558121	ABC	0.825	0.126	0.825	0.05
270	ABC	GSM558388	ABC	0.825	0.122	0.825	0.053
236	ABC	GSM558354	ABC	0.821	0.169	0.821	0.011
122	TypeIII	GSM558240	ABC	0.815	0.132	0.815	0.053
191	ABC	GSM558309	ABC	0.814	0.153	0.814	0.033
4	ABC	GSM558122	ABC	0.811	0.182	0.811	0.007
220	ABC	GSM558338	ABC	0.809	0.119	0.809	0.073
21	TypeIII	GSM558139	ABC	0.808	0.046	0.808	0.146
205	ABC	GSM558323	ABC	0.807	0.181	0.807	0.012
258	ABC	GSM558376	ABC	0.807	0.156	0.807	0.037
239	TypeIII	GSM558357	ABC	0.805	0.16	0.805	0.035
17	ABC	GSM558135	ABC	0.785	0.186	0.785	0.029
16	ABC	GSM558134	ABC	0.783	0.2	0.783	0.017
87	ABC	GSM558205	ABC	0.781	0.167	0.781	0.053
64	ABC	GSM558182	ABC	0.776	0.163	0.776	0.061
142	ABC	GSM558260	ABC	0.773	0.142	0.773	0.085
55	ABC	GSM558173	ABC	0.771	0.126	0.771	0.103
106	ABC	GSM558224	ABC	0.758	0.162	0.758	0.08
19	TypeIII	GSM558137	ABC	0.757	0.027	0.757	0.216
182	TypeIII	GSM558300	ABC	0.751	0.049	0.751	0.2
12	TypeIII	GSM558130	ABC	0.75	0.169	0.75	0.081
153	TypeIII	GSM558271	ABC	0.749	0.167	0.749	0.084
177	ABC	GSM558295	ABC	0.743	0.257	0.743	0
245	ABC	GSM558363	ABC	0.738	0.193	0.738	0.07
172	ABC	GSM558290	ABC	0.733	0.164	0.733	0.103
24	TypeIII	GSM558142	ABC	0.732	0.19	0.732	0.077
6	TypeIII	GSM558124	ABC	0.73	0.089	0.73	0.181
51	TypeIII	GSM558169	ABC	0.723	0.149	0.723	0.128
221	TypeIII	GSM558339	ABC	0.703	0.263	0.703	0.034
187	ABC	GSM558305	ABC	0.687	0.214	0.687	0.099
82	TypeIII	GSM558200	ABC	0.68	0.039	0.68	0.28
40	TypeIII	GSM558158	ABC	0.674	0.043	0.674	0.283
116	ABC	GSM558234	ABC	0.658	0.257	0.658	0.085
136	TypeIII	GSM558254	ABC	0.656	0.286	0.656	0.059
190	ABC	GSM558308	ABC	0.647	0.318	0.647	0.036
210	ABC	GSM558328	ABC	0.64	0.126	0.64	0.233
147	TypeIII	GSM558265	ABC	0.636	0.266	0.636	0.098
229	ABC	GSM558347	ABC	0.63	0.348	0.63	0.022
38	ABC	GSM558156	ABC	0.621	0.003	0.621	0.376
96	TypeIII	GSM558214	ABC	0.62	0.302	0.62	0.078
234	ABC	GSM558352	ABC	0.615	0.361	0.615	0.024
118	ABC	GSM558236	ABC	0.607	0.133	0.607	0.261
150	TypeIII	GSM558268	ABC	0.597	0.256	0.597	0.147
265	ABC	GSM558383	ABC	0.593	0.35	0.593	0.058
93	GCB	GSM558211	ABC	0.589	0.106	0.589	0.306
15	ABC	GSM558133	ABC	0.587	0.141	0.587	0.272
257	ABC	GSM558375	ABC	0.583	0.304	0.583	0.113
97	TypeIII	GSM558215	ABC	0.582	0.252	0.582	0.166
262	ABC	GSM558380	ABC	0.574	0.162	0.574	0.264
57	TypeIII	GSM558175	ABC	0.564	0.401	0.564	0.035
76	TypeIII	GSM558194	ABC	0.555	0.334	0.555	0.111
102	TypeIII	GSM558220	ABC	0.551	0.061	0.551	0.387
61	ABC	GSM558179	ABC	0.548	0.421	0.548	0.031
264	ABC	GSM558382	ABC	0.54	0.389	0.54	0.071
179	ABC	GSM558297	ABC	0.536	0.064	0.536	0.4
71	ABC	GSM558189	ABC	0.53	0.215	0.53	0.255
171	GCB	GSM558289	ABC	0.523	0.079	0.523	0.397
212	ABC	GSM558330	ABC	0.521	0.439	0.521	0.04
197	TypeIII	GSM558315	ABC	0.516	0.443	0.516	0.042
233	ABC	GSM558351	ABC	0.496	0.459	0.496	0.045
18	GCB	GSM558136	ABC	0.494	0.168	0.494	0.338
13	TypeIII	GSM558131	ABC	0.488	0.026	0.488	0.486
26	ABC	GSM558144	ABC	0.475	0.425	0.475	0.1
246	TypeIII	GSM558364	ABC	0.458	0.22	0.458	0.322
237	ABC	GSM558355	ABC	0.439	0.284	0.439	0.277
89	TypeIII	GSM558207	ABC	0.422	0.208	0.422	0.37
115	TypeIII	GSM558233	ABC	0.381	0.342	0.381	0.278
268	TypeIII	GSM558386	ABC	0.378	0.27	0.378	0.352
85	ABC	GSM558203	ABC	0.362	0.358	0.362	0.28
184	ABC	GSM558302	ABC	0.357	0.357	0.357	0.285
70	GCB	GSM558188	GCB	0.911	0.086	0.003	0.911
91	GCB	GSM558209	GCB	0.911	0.086	0.003	0.911
155	GCB	GSM558273	GCB	0.911	0.002	0.087	0.911
156	GCB	GSM558274	GCB	0.911	0.086	0.003	0.911
230	GCB	GSM558348	GCB	0.911	0.086	0.003	0.911
252	GCB	GSM558370	GCB	0.911	0.086	0.003	0.911
253	GCB	GSM558371	GCB	0.911	0.086	0.003	0.911
254	GCB	GSM558372	GCB	0.911	0.086	0.003	0.911
261	GCB	GSM558379	GCB	0.911	0.086	0.003	0.911
163	GCB	GSM558281	GCB	0.91	0.086	0.003	0.91
176	GCB	GSM558294	GCB	0.91	0.086	0.004	0.91
249	GCB	GSM558367	GCB	0.91	0.086	0.003	0.91
104	GCB	GSM558222	GCB	0.908	0.086	0.006	0.908
209	GCB	GSM558327	GCB	0.908	0.086	0.006	0.908
138	GCB	GSM558256	GCB	0.906	0.088	0.006	0.906
255	GCB	GSM558373	GCB	0.906	0.09	0.004	0.906
105	GCB	GSM558223	GCB	0.905	0.092	0.003	0.905
214	GCB	GSM558332	GCB	0.905	0.088	0.007	0.905
145	GCB	GSM558263	GCB	0.904	0.093	0.003	0.904
157	GCB	GSM558275	GCB	0.904	0.004	0.093	0.904
173	GCB	GSM558291	GCB	0.904	0.001	0.095	0.904
241	GCB	GSM558359	GCB	0.904	0.091	0.006	0.904
33	GCB	GSM558151	GCB	0.903	0.086	0.011	0.903
75	GCB	GSM558193	GCB	0.903	0.006	0.092	0.903
30	GCB	GSM558148	GCB	0.902	0.089	0.01	0.902
2	GCB	GSM558120	GCB	0.9	0.092	0.008	0.9
215	GCB	GSM558333	GCB	0.899	0.087	0.014	0.899
217	GCB	GSM558335	GCB	0.899	0.092	0.009	0.899
48	GCB	GSM558166	GCB	0.898	0.096	0.006	0.898
112	GCB	GSM558230	GCB	0.898	0.096	0.006	0.898
90	GCB	GSM558208	GCB	0.897	0.093	0.011	0.897
144	GCB	GSM558262	GCB	0.896	0.101	0.004	0.896
183	GCB	GSM558301	GCB	0.895	0.101	0.003	0.895
185	GCB	GSM558303	GCB	0.893	0.091	0.016	0.893
81	GCB	GSM558199	GCB	0.891	0.091	0.018	0.891
266	GCB	GSM558384	GCB	0.891	0.007	0.102	0.891
95	GCB	GSM558213	GCB	0.89	0.094	0.016	0.89
124	GCB	GSM558242	GCB	0.89	0.104	0.007	0.89
181	GCB	GSM558299	GCB	0.89	0.102	0.008	0.89
206	GCB	GSM558324	GCB	0.889	0.095	0.016	0.889
1	GCB	GSM558119	GCB	0.886	0.114	0	0.886
42	GCB	GSM558160	GCB	0.885	0.003	0.113	0.885
99	GCB	GSM558217	GCB	0.885	0.098	0.017	0.885
231	GCB	GSM558349	GCB	0.885	0.109	0.006	0.885
28	GCB	GSM558146	GCB	0.884	0.01	0.106	0.884
164	GCB	GSM558282	GCB	0.884	0.11	0.006	0.884
32	GCB	GSM558150	GCB	0.882	0.09	0.027	0.882
69	GCB	GSM558187	GCB	0.882	0.114	0.004	0.882
202	GCB	GSM558320	GCB	0.881	0.119	0	0.881
159	GCB	GSM558277	GCB	0.88	0.092	0.028	0.88
119	GCB	GSM558237	GCB	0.879	0.121	0	0.879
132	GCB	GSM558250	GCB	0.879	0.121	0	0.879
126	GCB	GSM558244	GCB	0.877	0.123	0	0.877
146	GCB	GSM558264	GCB	0.877	0.123	0	0.877
211	GCB	GSM558329	GCB	0.876	0.1	0.025	0.876
247	GCB	GSM558365	GCB	0.876	0.122	0.002	0.876
94	GCB	GSM558212	GCB	0.873	0.115	0.011	0.873
123	GCB	GSM558241	GCB	0.873	0.127	0	0.873
218	GCB	GSM558336	GCB	0.873	0.126	0	0.873
109	GCB	GSM558227	GCB	0.871	0.127	0.002	0.871
168	GCB	GSM558286	GCB	0.87	0.022	0.108	0.87
244	GCB	GSM558362	GCB	0.87	0.115	0.015	0.87
160	GCB	GSM558278	GCB	0.869	0.126	0.005	0.869
169	GCB	GSM558287	GCB	0.868	0.13	0.002	0.868
162	GCB	GSM558280	GCB	0.867	0.11	0.023	0.867
14	GCB	GSM558132	GCB	0.866	0.128	0.006	0.866
110	GCB	GSM558228	GCB	0.866	0.132	0.002	0.866
25	GCB	GSM558143	GCB	0.86	0.139	0	0.86
56	GCB	GSM558174	GCB	0.857	0.135	0.008	0.857
139	GCB	GSM558257	GCB	0.857	0.143	0.001	0.857
180	GCB	GSM558298	GCB	0.856	0.144	0	0.856
195	GCB	GSM558313	GCB	0.853	0.142	0.005	0.853
204	GCB	GSM558322	GCB	0.852	0.122	0.026	0.852
50	GCB	GSM558168	GCB	0.851	0.149	0	0.851
178	GCB	GSM558296	GCB	0.846	0.151	0.003	0.846
23	GCB	GSM558141	GCB	0.844	0.142	0.014	0.844
43	TypeIII	GSM558161	GCB	0.843	0.137	0.02	0.843
166	GCB	GSM558284	GCB	0.843	0.149	0.008	0.843
34	GCB	GSM558152	GCB	0.842	0.009	0.149	0.842
92	GCB	GSM558210	GCB	0.839	0.027	0.134	0.839
45	GCB	GSM558163	GCB	0.837	0.024	0.139	0.837
213	GCB	GSM558331	GCB	0.835	0.125	0.04	0.835
224	GCB	GSM558342	GCB	0.834	0.164	0.003	0.834
186	GCB	GSM558304	GCB	0.827	0.059	0.114	0.827
20	GCB	GSM558138	GCB	0.822	0.019	0.159	0.822
235	GCB	GSM558353	GCB	0.82	0.179	0	0.82
148	GCB	GSM558266	GCB	0.817	0.179	0.004	0.817
54	GCB	GSM558172	GCB	0.816	0.184	0	0.816
68	GCB	GSM558186	GCB	0.814	0.153	0.033	0.814
219	TypeIII	GSM558337	GCB	0.808	0.136	0.056	0.808
53	GCB	GSM558171	GCB	0.792	0.135	0.072	0.792
238	GCB	GSM558356	GCB	0.791	0.186	0.023	0.791
251	GCB	GSM558369	GCB	0.79	0.048	0.163	0.79
175	GCB	GSM558293	GCB	0.785	0.197	0.019	0.785
80	GCB	GSM558198	GCB	0.772	0.176	0.052	0.772
36	TypeIII	GSM558154	GCB	0.757	0.054	0.189	0.757
66	GCB	GSM558184	GCB	0.745	0.206	0.048	0.745
263	GCB	GSM558381	GCB	0.742	0.222	0.036	0.742
256	TypeIII	GSM558374	GCB	0.739	0.254	0.008	0.739
111	GCB	GSM558229	GCB	0.738	0.052	0.21	0.738
199	GCB	GSM558317	GCB	0.736	0.166	0.098	0.736
35	GCB	GSM558153	GCB	0.719	0.062	0.219	0.719
29	GCB	GSM558147	GCB	0.712	0.044	0.244	0.712
72	GCB	GSM558190	GCB	0.711	0.074	0.215	0.711
242	GCB	GSM558360	GCB	0.703	0.027	0.27	0.703
8	GCB	GSM558126	GCB	0.699	0.009	0.292	0.699
135	GCB	GSM558253	GCB	0.685	0.076	0.239	0.685
248	TypeIII	GSM558366	GCB	0.68	0.31	0.01	0.68
207	TypeIII	GSM558325	GCB	0.655	0.315	0.03	0.655
46	GCB	GSM558164	GCB	0.641	0.357	0.002	0.641
161	GCB	GSM558279	GCB	0.64	0.143	0.217	0.64
133	GCB	GSM558251	GCB	0.637	0.054	0.31	0.637
31	GCB	GSM558149	GCB	0.626	0.13	0.245	0.626
59	GCB	GSM558177	GCB	0.621	0.253	0.126	0.621
193	GCB	GSM558311	GCB	0.62	0.138	0.242	0.62
37	GCB	GSM558155	GCB	0.61	0.388	0.002	0.61
84	GCB	GSM558202	GCB	0.608	0.367	0.025	0.608
201	GCB	GSM558319	GCB	0.597	0.4	0.003	0.597
260	TypeIII	GSM558378	GCB	0.594	0.043	0.364	0.594
77	GCB	GSM558195	GCB	0.584	0.388	0.028	0.584
103	GCB	GSM558221	GCB	0.583	0.326	0.091	0.583
225	GCB	GSM558343	GCB	0.582	0.405	0.013	0.582
167	TypeIII	GSM558285	GCB	0.578	0.173	0.249	0.578
41	GCB	GSM558159	GCB	0.573	0.198	0.229	0.573
121	GCB	GSM558239	GCB	0.562	0.406	0.032	0.562
194	TypeIII	GSM558312	GCB	0.556	0.407	0.037	0.556
114	GCB	GSM558232	GCB	0.554	0.153	0.293	0.554
39	GCB	GSM558157	GCB	0.549	0.43	0.02	0.549
250	ABC	GSM558368	GCB	0.549	0.365	0.086	0.549
5	GCB	GSM558123	GCB	0.541	0.371	0.088	0.541
271	TypeIII	GSM558389	GCB	0.531	0.014	0.455	0.531
203	GCB	GSM558321	GCB	0.524	0.16	0.317	0.524
74	GCB	GSM558192	GCB	0.509	0.449	0.043	0.509
170	GCB	GSM558288	GCB	0.506	0.244	0.25	0.506
134	GCB	GSM558252	GCB	0.505	0.475	0.02	0.505
227	GCB	GSM558345	GCB	0.481	0.291	0.229	0.481
108	TypeIII	GSM558226	GCB	0.451	0.253	0.296	0.451
107	GCB	GSM558225	GCB	0.447	0.3	0.253	0.447
216	GCB	GSM558334	GCB	0.441	0.315	0.244	0.441
65	GCB	GSM558183	GCB	0.399	0.255	0.347	0.399
140	GCB	GSM558258	TypeIII	0.877	0.877	0.107	0.017
58	ABC	GSM558176	TypeIII	0.847	0.847	0.136	0.017
223	GCB	GSM558341	TypeIII	0.839	0.839	0.01	0.151
141	ABC	GSM558259	TypeIII	0.832	0.832	0.131	0.037
11	ABC	GSM558129	TypeIII	0.823	0.823	0.161	0.017
228	GCB	GSM558346	TypeIII	0.82	0.82	0.161	0.019
129	ABC	GSM558247	TypeIII	0.817	0.817	0.167	0.017
149	TypeIII	GSM558267	TypeIII	0.811	0.811	0.048	0.141
200	TypeIII	GSM558318	TypeIII	0.809	0.809	0.041	0.15
100	GCB	GSM558218	TypeIII	0.808	0.808	0.037	0.155
267	TypeIII	GSM558385	TypeIII	0.748	0.748	0.242	0.01
78	TypeIII	GSM558196	TypeIII	0.742	0.742	0.183	0.075
222	TypeIII	GSM558340	TypeIII	0.739	0.739	0.041	0.22
137	TypeIII	GSM558255	TypeIII	0.705	0.705	0.009	0.286
131	TypeIII	GSM558249	TypeIII	0.694	0.694	0.032	0.273
98	TypeIII	GSM558216	TypeIII	0.687	0.687	0.026	0.287
174	TypeIII	GSM558292	TypeIII	0.684	0.684	0.047	0.269
127	TypeIII	GSM558245	TypeIII	0.679	0.679	0.206	0.115
196	ABC	GSM558314	TypeIII	0.663	0.663	0.263	0.074
158	GCB	GSM558276	TypeIII	0.614	0.614	0.034	0.351
188	GCB	GSM558306	TypeIII	0.605	0.605	0.01	0.385
143	TypeIII	GSM558261	TypeIII	0.6	0.6	0.329	0.071
22	TypeIII	GSM558140	TypeIII	0.586	0.586	0.257	0.156
189	GCB	GSM558307	TypeIII	0.574	0.574	0.005	0.421
154	GCB	GSM558272	TypeIII	0.563	0.563	0.024	0.413
86	ABC	GSM558204	TypeIII	0.557	0.557	0.401	0.041
152	GCB	GSM558270	TypeIII	0.555	0.555	0.016	0.429
165	GCB	GSM558283	TypeIII	0.547	0.547	0.009	0.444
83	TypeIII	GSM558201	TypeIII	0.544	0.544	0.081	0.375
232	TypeIII	GSM558350	TypeIII	0.53	0.53	0.425	0.045
125	TypeIII	GSM558243	TypeIII	0.518	0.518	0.092	0.39
128	GCB	GSM558246	TypeIII	0.517	0.517	0.025	0.457
9	ABC	GSM558127	TypeIII	0.503	0.503	0.487	0.01
113	TypeIII	GSM558231	TypeIII	0.503	0.503	0.051	0.446
240	GCB	GSM558358	TypeIII	0.503	0.503	0.018	0.479
243	GCB	GSM558361	TypeIII	0.494	0.494	0.014	0.492
198	ABC	GSM558316	TypeIII	0.493	0.493	0.431	0.076
60	TypeIII	GSM558178	TypeIII	0.453	0.453	0.197	0.35

## Sheet: GSE22895
		WRIGHT TRAINED
OriginalOrder	Sample	ClassLMT_J48_RF100_SMO	MaxConf	TypeIII	ABC	GCB
44	GSM565524	ABC	0.905	0.095	0.905	0
24	GSM565504	ABC	0.902	0.092	0.902	0.006
18	GSM565498	ABC	0.896	0.103	0.896	0.001
59	GSM565539	ABC	0.892	0.105	0.892	0.004
99	GSM565579	ABC	0.883	0.113	0.883	0.004
16	GSM565496	ABC	0.882	0.11	0.882	0.008
20	GSM565500	ABC	0.882	0.096	0.882	0.021
35	GSM565515	ABC	0.861	0.135	0.861	0.004
66	GSM565546	ABC	0.858	0.127	0.858	0.015
6	GSM565486	ABC	0.855	0.101	0.855	0.044
25	GSM565505	ABC	0.827	0.14	0.827	0.032
81	GSM565561	ABC	0.825	0.017	0.825	0.158
82	GSM565562	ABC	0.823	0.105	0.823	0.073
33	GSM565513	ABC	0.82	0.176	0.82	0.004
3	GSM565483	ABC	0.795	0.162	0.795	0.044
23	GSM565503	ABC	0.779	0.165	0.779	0.056
69	GSM565549	ABC	0.777	0.186	0.777	0.037
63	GSM565543	ABC	0.766	0.061	0.766	0.173
72	GSM565552	ABC	0.744	0.084	0.744	0.171
51	GSM565531	ABC	0.711	0.265	0.711	0.023
70	GSM565550	ABC	0.693	0.225	0.693	0.082
61	GSM565541	ABC	0.646	0.265	0.646	0.089
30	GSM565510	ABC	0.598	0.131	0.598	0.271
75	GSM565555	ABC	0.586	0.025	0.586	0.389
7	GSM565487	ABC	0.567	0.157	0.567	0.277
60	GSM565540	ABC	0.548	0.046	0.548	0.406
46	GSM565526	ABC	0.522	0.475	0.522	0.003
67	GSM565547	ABC	0.492	0.384	0.492	0.124
29	GSM565509	ABC	0.482	0.249	0.482	0.269
78	GSM565558	ABC	0.48	0.04	0.48	0.479
43	GSM565523	ABC	0.477	0.415	0.477	0.108
38	GSM565518	ABC	0.472	0.169	0.472	0.359
37	GSM565517	GCB	0.911	0.086	0.003	0.911
55	GSM565535	GCB	0.911	0.003	0.086	0.911
56	GSM565536	GCB	0.911	0.086	0.003	0.911
47	GSM565527	GCB	0.91	0.086	0.003	0.91
2	GSM565482	GCB	0.908	0.086	0.006	0.908
45	GSM565525	GCB	0.908	0.086	0.006	0.908
100	GSM565580	GCB	0.908	0.086	0.006	0.908
94	GSM565574	GCB	0.907	0.09	0.004	0.907
53	GSM565533	GCB	0.905	0.005	0.09	0.905
41	GSM565521	GCB	0.904	0.093	0.003	0.904
65	GSM565545	GCB	0.901	0.096	0.003	0.901
98	GSM565578	GCB	0.898	0.003	0.099	0.898
10	GSM565490	GCB	0.893	0.093	0.014	0.893
52	GSM565532	GCB	0.893	0.094	0.013	0.893
87	GSM565567	GCB	0.882	0.01	0.108	0.882
22	GSM565502	GCB	0.876	0.121	0.003	0.876
21	GSM565501	GCB	0.874	0.116	0.01	0.874
50	GSM565530	GCB	0.874	0.097	0.029	0.874
34	GSM565514	GCB	0.87	0.13	0	0.87
13	GSM565493	GCB	0.862	0.135	0.003	0.862
19	GSM565499	GCB	0.854	0.128	0.019	0.854
92	GSM565572	GCB	0.844	0.156	0	0.844
96	GSM565576	GCB	0.833	0.008	0.159	0.833
93	GSM565573	GCB	0.831	0.143	0.026	0.831
1	GSM565481	GCB	0.829	0.144	0.027	0.829
85	GSM565565	GCB	0.828	0.139	0.033	0.828
32	GSM565512	GCB	0.826	0.171	0.003	0.826
71	GSM565551	GCB	0.824	0.14	0.036	0.824
76	GSM565556	GCB	0.82	0.027	0.153	0.82
101	GSM587405	GCB	0.81	0.026	0.164	0.81
12	GSM565492	GCB	0.809	0.171	0.02	0.809
27	GSM565507	GCB	0.796	0.134	0.07	0.796
84	GSM565564	GCB	0.79	0.208	0.002	0.79
86	GSM565566	GCB	0.787	0.213	0	0.787
42	GSM565522	GCB	0.761	0.184	0.055	0.761
90	GSM565570	GCB	0.753	0.082	0.165	0.753
8	GSM565488	GCB	0.744	0.229	0.027	0.744
28	GSM565508	GCB	0.706	0.031	0.262	0.706
88	GSM565568	GCB	0.683	0.304	0.013	0.683
48	GSM565528	GCB	0.678	0.006	0.316	0.678
4	GSM565484	GCB	0.653	0.027	0.321	0.653
5	GSM565485	GCB	0.63	0.191	0.179	0.63
31	GSM565511	GCB	0.615	0.027	0.358	0.615
49	GSM565529	GCB	0.569	0.423	0.008	0.569
14	GSM565494	GCB	0.536	0.446	0.019	0.536
15	GSM565495	GCB	0.532	0.032	0.437	0.532
95	GSM565575	GCB	0.512	0.206	0.282	0.512
36	GSM565516	GCB	0.397	0.234	0.369	0.397
58	GSM565538	TypeIII	0.901	0.901	0.009	0.09
80	GSM565560	TypeIII	0.896	0.896	0.005	0.099
54	GSM565534	TypeIII	0.895	0.895	0.002	0.103
39	GSM565519	TypeIII	0.878	0.878	0.017	0.105
26	GSM565506	TypeIII	0.853	0.853	0.01	0.137
77	GSM565557	TypeIII	0.845	0.845	0.03	0.125
97	GSM565577	TypeIII	0.843	0.843	0.149	0.008
79	GSM565559	TypeIII	0.837	0.837	0.155	0.008
73	GSM565553	TypeIII	0.796	0.796	0.197	0.007
9	GSM565489	TypeIII	0.795	0.795	0.197	0.007
17	GSM565497	TypeIII	0.76	0.76	0.178	0.062
89	GSM565569	TypeIII	0.741	0.741	0.214	0.045
11	GSM565491	TypeIII	0.722	0.722	0.067	0.212
83	GSM565563	TypeIII	0.703	0.703	0.17	0.126
40	GSM565520	TypeIII	0.699	0.699	0.273	0.027
62	GSM565542	TypeIII	0.625	0.625	0.107	0.267
74	GSM565554	TypeIII	0.623	0.623	0.003	0.374
91	GSM565571	TypeIII	0.61	0.61	0.308	0.082
68	GSM565548	TypeIII	0.544	0.544	0.44	0.016
64	GSM565544	TypeIII	0.466	0.466	0.451	0.083
57	GSM565537	TypeIII	0.463	0.463	0.078	0.459

## Sheet: GSE31312
				WRIGHT TRAINED
OriginalOrder	Sample	immunohistochemistryClassified	GeneExpClassified	ClassLMT_J48_RF100_SMO	MaxConf	TypeIII	ABC	GCB
320	GSM776298	ABC	ABC	ABC	0.907	0.093	0.907	0
485	GSM776463	ABC	ABC	ABC	0.907	0.09	0.907	0.003
362	GSM776340	ABC	ABC	ABC	0.899	0.098	0.899	0.002
32	GSM776010	ABC	ABC	ABC	0.896	0.104	0.896	0
329	GSM776307	ABC	ABC	ABC	0.894	0.099	0.894	0.008
187	GSM776165	ABC	ABC	ABC	0.893	0.097	0.893	0.009
64	GSM776042	ABC	ABC	ABC	0.889	0.11	0.889	0.001
219	GSM776197	GCB	ABC	ABC	0.889	0.108	0.889	0.003
387	GSM776365	ABC	ABC	ABC	0.889	0.097	0.889	0.014
339	GSM776317	ABC	ABC	ABC	0.886	0.013	0.886	0.101
224	GSM776202	GCB	ABC	ABC	0.875	0.012	0.875	0.113
435	GSM776413	ABC	ABC	ABC	0.871	0.121	0.871	0.008
228	GSM776206	GCB	ABC	ABC	0.867	0.01	0.867	0.123
352	GSM776330	GCB	ABC	ABC	0.866	0.126	0.866	0.008
340	GSM776318	ABC	ABC	ABC	0.864	0.028	0.864	0.108
10	GSM775988	ABC	ABC	ABC	0.862	0.126	0.862	0.011
304	GSM776282	ABC	ABC	ABC	0.862	0.107	0.862	0.03
464	GSM776442	ABC	ABC	ABC	0.862	0.13	0.862	0.008
119	GSM776097	ABC	ABC	ABC	0.861	0.128	0.861	0.01
196	GSM776174	ABC	ABC	ABC	0.858	0.131	0.858	0.011
417	GSM776395	ABC	ABC	ABC	0.858	0.132	0.858	0.01
359	GSM776337	GCB	ABC	ABC	0.855	0.105	0.855	0.04
455	GSM776433	GCB	ABC	ABC	0.854	0.102	0.854	0.044
230	GSM776208	ABC	ABC	ABC	0.852	0.148	0.852	0
428	GSM776406	ABC	ABC	ABC	0.848	0.133	0.848	0.018
395	GSM776373	ABC	ABC	ABC	0.846	0.105	0.846	0.048
88	GSM776066	ABC	ABC	ABC	0.845	0.145	0.845	0.01
239	GSM776217	ABC	ABC	ABC	0.841	0.139	0.841	0.02
30	GSM776008	ABC	ABC	ABC	0.84	0.102	0.84	0.058
122	GSM776100	ABC	ABC	ABC	0.84	0.127	0.84	0.033
433	GSM776411	ABC	ABC	ABC	0.835	0.043	0.835	0.122
74	GSM776052	GCB	ABC	ABC	0.834	0.02	0.834	0.146
143	GSM776121	ABC	ABC	ABC	0.833	0.117	0.833	0.05
346	GSM776324	ABC	ABC	ABC	0.833	0.153	0.833	0.014
173	GSM776151	ABC	ABC	ABC	0.832	0.097	0.832	0.07
140	GSM776118	ABC	ABC	ABC	0.831	0.143	0.831	0.026
201	GSM776179	ABC	ABC	ABC	0.831	0.142	0.831	0.027
310	GSM776288	ABC	ABC	ABC	0.829	0.138	0.829	0.033
409	GSM776387	ABC	ABC	ABC	0.829	0.017	0.829	0.154
53	GSM776031	ABC	ABC	ABC	0.827	0.129	0.827	0.044
288	GSM776266	ABC	ABC	ABC	0.827	0.118	0.827	0.055
308	GSM776286	ABC	ABC	ABC	0.827	0.163	0.827	0.011
281	GSM776259	ABC	ABC	ABC	0.825	0.137	0.825	0.037
240	GSM776218	ABC	ABC	ABC	0.823	0.166	0.823	0.01
397	GSM776375	ABC	ABC	ABC	0.823	0.135	0.823	0.042
472	GSM776450	ABC	ABC	ABC	0.821	0.125	0.821	0.054
457	GSM776435	ABC	ABC	ABC	0.819	0.139	0.819	0.042
55	GSM776033	ABC	ABC	ABC	0.818	0.103	0.818	0.078
305	GSM776283	ABC	ABC	ABC	0.818	0.036	0.818	0.147
489	GSM776467	ABC	ABC	ABC	0.814	0.168	0.814	0.018
238	GSM776216	ABC	ABC	ABC	0.809	0.175	0.809	0.016
470	GSM776448	ABC	ABC	ABC	0.806	0.15	0.806	0.043
278	GSM776256	ABC	ABC	ABC	0.805	0.151	0.805	0.044
68	GSM776046	ABC	ABC	ABC	0.804	0.03	0.804	0.166
27	GSM776005	GCB	ABC	ABC	0.799	0.186	0.799	0.015
335	GSM776313	ABC	ABC	ABC	0.799	0.172	0.799	0.029
223	GSM776201	ABC	ABC	ABC	0.798	0.139	0.798	0.062
290	GSM776268	ABC	ABC	ABC	0.797	0.165	0.797	0.038
258	GSM776236	ABC	ABC	ABC	0.796	0.039	0.796	0.165
200	GSM776178	ABC	ABC	ABC	0.794	0.162	0.794	0.044
421	GSM776399	ABC	ABC	ABC	0.794	0.069	0.794	0.138
434	GSM776412	ABC	ABC	ABC	0.793	0.146	0.793	0.061
82	GSM776060	ABC	ABC	ABC	0.791	0.185	0.791	0.024
364	GSM776342	ABC	ABC	ABC	0.789	0.192	0.789	0.019
378	GSM776356	ABC	ABC	ABC	0.789	0.179	0.789	0.032
118	GSM776096	ABC	ABC	ABC	0.788	0.177	0.788	0.035
326	GSM776304	ABC	ABC	ABC	0.786	0.066	0.786	0.148
7	GSM775985	NA	ABC	ABC	0.785	0.195	0.785	0.02
184	GSM776162	GCB	ABC	ABC	0.783	0.137	0.783	0.08
316	GSM776294	ABC	ABC	ABC	0.782	0.143	0.782	0.075
440	GSM776418	ABC	ABC	ABC	0.779	0.213	0.779	0.008
444	GSM776422	GCB	ABC	ABC	0.778	0.214	0.778	0.008
135	GSM776113	ABC	ABC	ABC	0.776	0.072	0.776	0.152
65	GSM776043	ABC	ABC	ABC	0.774	0.034	0.774	0.192
476	GSM776454	ABC	ABC	ABC	0.774	0.121	0.774	0.105
149	GSM776127	ABC	ABC	ABC	0.772	0.065	0.772	0.162
430	GSM776408	ABC	ABC	ABC	0.768	0.167	0.768	0.065
19	GSM775997	ABC	ABC	ABC	0.766	0.074	0.766	0.16
279	GSM776257	ABC	ABC	ABC	0.764	0.183	0.764	0.054
344	GSM776322	ABC	ABC	ABC	0.764	0.052	0.764	0.184
172	GSM776150	GCB	ABC	ABC	0.763	0.036	0.763	0.201
114	GSM776092	GCB	ABC	ABC	0.761	0.228	0.761	0.011
414	GSM776392	GCB	GCB	ABC	0.761	0.037	0.761	0.201
180	GSM776158	GCB	ABC	ABC	0.759	0.045	0.759	0.196
289	GSM776267	ABC	ABC	ABC	0.753	0.066	0.753	0.181
314	GSM776292	GCB	ABC	ABC	0.752	0.04	0.752	0.208
432	GSM776410	ABC	ABC	ABC	0.748	0.173	0.748	0.079
307	GSM776285	ABC	ABC	ABC	0.738	0.194	0.738	0.068
313	GSM776291	ABC	ABC	ABC	0.734	0.205	0.734	0.061
220	GSM776198	GCB	ABC	ABC	0.732	0.178	0.732	0.09
35	GSM776013	ABC	ABC	ABC	0.727	0.208	0.727	0.065
322	GSM776300	ABC	ABC	ABC	0.727	0.229	0.727	0.044
330	GSM776308	ABC	ABC	ABC	0.723	0.17	0.723	0.107
168	GSM776146	ABC	ABC	ABC	0.722	0.217	0.722	0.062
365	GSM776343	ABC	ABC	ABC	0.718	0.043	0.718	0.24
123	GSM776101	ABC	ABC	ABC	0.705	0.201	0.705	0.093
47	GSM776025	ABC	ABC	ABC	0.704	0.25	0.704	0.046
303	GSM776281	ABC	TypeIII	ABC	0.7	0.082	0.7	0.218
267	GSM776245	ABC	ABC	ABC	0.697	0.252	0.697	0.051
369	GSM776347	GCB	GCB	ABC	0.697	0.113	0.697	0.19
334	GSM776312	ABC	GCB	ABC	0.674	0.061	0.674	0.265
69	GSM776047	ABC	ABC	ABC	0.668	0.071	0.668	0.261
345	GSM776323	GCB	ABC	ABC	0.659	0.049	0.659	0.292
490	GSM776468	ABC	ABC	ABC	0.655	0.312	0.655	0.033
161	GSM776139	ABC	ABC	ABC	0.65	0.03	0.65	0.32
439	GSM776417	GCB	ABC	ABC	0.645	0.276	0.645	0.078
353	GSM776331	ABC	TypeIII	ABC	0.64	0.266	0.64	0.094
81	GSM776059	ABC	ABC	ABC	0.639	0.275	0.639	0.086
52	GSM776030	ABC	ABC	ABC	0.633	0.107	0.633	0.26
8	GSM775986	ABC	ABC	ABC	0.63	0.156	0.63	0.214
323	GSM776301	ABC	ABC	ABC	0.628	0.345	0.628	0.027
331	GSM776309	ABC	ABC	ABC	0.627	0.113	0.627	0.26
229	GSM776207	ABC	ABC	ABC	0.62	0.121	0.62	0.259
86	GSM776064	ABC	ABC	ABC	0.618	0.12	0.618	0.261
498	GSM776476	ABC	ABC	ABC	0.618	0.331	0.618	0.052
208	GSM776186	ABC	ABC	ABC	0.617	0.119	0.617	0.264
76	GSM776054	ABC	ABC	ABC	0.613	0.027	0.613	0.36
139	GSM776117	ABC	ABC	ABC	0.607	0.035	0.607	0.358
402	GSM776380	ABC	ABC	ABC	0.607	0.347	0.607	0.046
120	GSM776098	ABC	ABC	ABC	0.605	0.103	0.605	0.291
371	GSM776349	GCB	ABC	ABC	0.6	0.325	0.6	0.075
63	GSM776041	ABC	ABC	ABC	0.598	0.016	0.598	0.386
271	GSM776249	ABC	ABC	ABC	0.598	0.175	0.598	0.226
461	GSM776439	GCB	ABC	ABC	0.595	0.356	0.595	0.049
227	GSM776205	ABC	TypeIII	ABC	0.59	0.037	0.59	0.372
116	GSM776094	GCB	ABC	ABC	0.589	0.064	0.589	0.347
274	GSM776252	ABC	ABC	ABC	0.584	0.161	0.584	0.255
442	GSM776420	ABC	ABC	ABC	0.584	0.348	0.584	0.068
256	GSM776234	ABC	ABC	ABC	0.581	0.035	0.581	0.384
479	GSM776457	ABC	ABC	ABC	0.58	0.118	0.58	0.302
130	GSM776108	ABC	ABC	ABC	0.575	0.154	0.575	0.271
29	GSM776007	ABC	ABC	ABC	0.571	0.14	0.571	0.289
263	GSM776241	ABC	ABC	ABC	0.57	0.036	0.57	0.394
179	GSM776157	ABC	ABC	ABC	0.569	0.33	0.569	0.101
420	GSM776398	GCB	ABC	ABC	0.569	0.373	0.569	0.058
302	GSM776280	ABC	ABC	ABC	0.567	0.051	0.567	0.382
494	GSM776472	ABC	ABC	ABC	0.566	0.417	0.566	0.017
488	GSM776466	ABC	ABC	ABC	0.557	0.042	0.557	0.401
209	GSM776187	GCB	ABC	ABC	0.55	0.429	0.55	0.021
337	GSM776315	ABC	GCB	ABC	0.549	0.283	0.549	0.168
146	GSM776124	ABC	ABC	ABC	0.548	0.076	0.548	0.377
298	GSM776276	ABC	ABC	ABC	0.547	0.059	0.547	0.393
312	GSM776290	ABC	ABC	ABC	0.544	0.068	0.544	0.387
473	GSM776451	ABC	ABC	ABC	0.544	0.358	0.544	0.098
493	GSM776471	ABC	ABC	ABC	0.54	0.254	0.54	0.206
33	GSM776011	ABC	TypeIII	ABC	0.534	0.027	0.534	0.438
282	GSM776260	ABC	ABC	ABC	0.534	0.383	0.534	0.083
233	GSM776211	ABC	ABC	ABC	0.526	0.371	0.526	0.103
319	GSM776297	ABC	ABC	ABC	0.525	0.297	0.525	0.178
363	GSM776341	GCB	ABC	ABC	0.52	0.469	0.52	0.011
181	GSM776159	ABC	ABC	ABC	0.516	0.115	0.516	0.369
58	GSM776036	GCB	GCB	ABC	0.515	0.098	0.515	0.387
481	GSM776459	ABC	ABC	ABC	0.509	0.384	0.509	0.106
16	GSM775994	ABC	ABC	ABC	0.505	0.18	0.505	0.315
160	GSM776138	ABC	ABC	ABC	0.502	0.086	0.502	0.412
72	GSM776050	ABC	ABC	ABC	0.499	0.411	0.499	0.09
20	GSM775998	ABC	ABC	ABC	0.498	0.384	0.498	0.118
137	GSM776115	ABC	ABC	ABC	0.498	0.429	0.498	0.073
12	GSM775990	GCB	ABC	ABC	0.497	0.351	0.497	0.152
246	GSM776224	ABC	ABC	ABC	0.494	0.431	0.494	0.075
287	GSM776265	ABC	ABC	ABC	0.49	0.18	0.49	0.33
299	GSM776277	ABC	TypeIII	ABC	0.487	0.034	0.487	0.479
296	GSM776274	GCB	ABC	ABC	0.471	0.06	0.471	0.469
438	GSM776416	ABC	ABC	ABC	0.464	0.44	0.464	0.095
318	GSM776296	ABC	ABC	ABC	0.463	0.191	0.463	0.346
6	GSM775984	ABC	ABC	ABC	0.455	0.233	0.455	0.312
424	GSM776402	GCB	ABC	ABC	0.442	0.365	0.442	0.193
113	GSM776091	GCB	GCB	ABC	0.433	0.288	0.433	0.278
175	GSM776153	ABC	ABC	ABC	0.425	0.195	0.425	0.38
404	GSM776382	ABC	ABC	ABC	0.425	0.337	0.425	0.238
164	GSM776142	ABC	ABC	ABC	0.417	0.389	0.417	0.194
127	GSM776105	ABC	ABC	ABC	0.362	0.284	0.362	0.355
212	GSM776190	GCB	GCB	GCB	0.911	0.086	0.003	0.911
332	GSM776310	GCB	GCB	GCB	0.911	0.086	0.003	0.911
441	GSM776419	GCB	GCB	GCB	0.911	0.086	0.003	0.911
480	GSM776458	ABC	GCB	GCB	0.91	0.086	0.003	0.91
390	GSM776368	GCB	GCB	GCB	0.909	0.088	0.003	0.909
46	GSM776024	GCB	GCB	GCB	0.908	0.002	0.089	0.908
382	GSM776360	GCB	GCB	GCB	0.908	0.086	0.006	0.908
458	GSM776436	GCB	GCB	GCB	0.908	0.005	0.087	0.908
138	GSM776116	GCB	GCB	GCB	0.907	0.087	0.006	0.907
386	GSM776364	GCB	GCB	GCB	0.907	0.007	0.086	0.907
183	GSM776161	GCB	GCB	GCB	0.906	0.088	0.006	0.906
210	GSM776188	GCB	GCB	GCB	0.906	0.087	0.006	0.906
225	GSM776203	GCB	GCB	GCB	0.906	0.091	0.003	0.906
285	GSM776263	GCB	GCB	GCB	0.906	0.089	0.005	0.906
418	GSM776396	GCB	GCB	GCB	0.906	0.088	0.006	0.906
454	GSM776432	GCB	GCB	GCB	0.905	0.088	0.007	0.905
25	GSM776003	GCB	GCB	GCB	0.904	0.092	0.003	0.904
178	GSM776156	GCB	GCB	GCB	0.904	0.09	0.007	0.904
254	GSM776232	GCB	GCB	GCB	0.904	0.087	0.009	0.904
374	GSM776352	GCB	GCB	GCB	0.904	0.088	0.008	0.904
467	GSM776445	ABC	GCB	GCB	0.904	0.092	0.004	0.904
349	GSM776327	GCB	GCB	GCB	0.903	0.085	0.012	0.903
358	GSM776336	GCB	GCB	GCB	0.903	0.01	0.087	0.903
405	GSM776383	GCB	GCB	GCB	0.903	0.087	0.01	0.903
437	GSM776415	GCB	GCB	GCB	0.903	0.093	0.003	0.903
431	GSM776409	GCB	GCB	GCB	0.902	0.092	0.006	0.902
38	GSM776016	GCB	GCB	GCB	0.901	0.088	0.011	0.901
115	GSM776093	GCB	GCB	GCB	0.901	0.093	0.005	0.901
170	GSM776148	GCB	GCB	GCB	0.901	0.091	0.008	0.901
401	GSM776379	GCB	GCB	GCB	0.901	0.091	0.008	0.901
462	GSM776440	GCB	GCB	GCB	0.901	0.09	0.01	0.901
194	GSM776172	GCB	GCB	GCB	0.9	0.003	0.097	0.9
398	GSM776376	GCB	GCB	GCB	0.9	0.005	0.095	0.9
182	GSM776160	GCB	GCB	GCB	0.899	0.002	0.099	0.899
87	GSM776065	GCB	GCB	GCB	0.898	0.092	0.01	0.898
269	GSM776247	ABC	GCB	GCB	0.898	0.097	0.005	0.898
475	GSM776453	GCB	GCB	GCB	0.898	0.094	0.008	0.898
4	GSM775982	GCB	GCB	GCB	0.897	0.091	0.012	0.897
202	GSM776180	GCB	GCB	GCB	0.897	0.01	0.092	0.897
379	GSM776357	GCB	GCB	GCB	0.897	0.094	0.009	0.897
42	GSM776020	GCB	GCB	GCB	0.896	0.091	0.013	0.896
260	GSM776238	GCB	GCB	GCB	0.896	0.093	0.011	0.896
106	GSM776084	GCB	GCB	GCB	0.895	0.097	0.008	0.895
110	GSM776088	ABC	GCB	GCB	0.894	0.102	0.003	0.894
73	GSM776051	GCB	GCB	GCB	0.892	0.092	0.017	0.892
396	GSM776374	GCB	GCB	GCB	0.892	0.097	0.012	0.892
217	GSM776195	GCB	GCB	GCB	0.891	0.103	0.006	0.891
327	GSM776305	GCB	GCB	GCB	0.89	0.093	0.017	0.89
226	GSM776204	GCB	GCB	GCB	0.889	0.009	0.102	0.889
456	GSM776434	GCB	GCB	GCB	0.889	0.094	0.018	0.889
193	GSM776171	ABC	GCB	GCB	0.886	0.097	0.018	0.886
452	GSM776430	GCB	GCB	GCB	0.886	0.113	0	0.886
40	GSM776018	GCB	GCB	GCB	0.885	0.013	0.103	0.885
370	GSM776348	GCB	GCB	GCB	0.885	0.007	0.108	0.885
34	GSM776012	GCB	GCB	GCB	0.884	0.109	0.008	0.884
61	GSM776039	ABC	GCB	GCB	0.884	0.007	0.109	0.884
75	GSM776053	GCB	GCB	GCB	0.884	0.107	0.009	0.884
266	GSM776244	GCB	GCB	GCB	0.884	0.008	0.108	0.884
207	GSM776185	GCB	GCB	GCB	0.882	0.097	0.021	0.882
477	GSM776455	GCB	TypeIII	GCB	0.882	0.087	0.031	0.882
136	GSM776114	ABC	GCB	GCB	0.881	0.119	0	0.881
384	GSM776362	GCB	GCB	GCB	0.88	0.086	0.034	0.88
45	GSM776023	GCB	GCB	GCB	0.879	0.09	0.03	0.879
459	GSM776437	GCB	GCB	GCB	0.879	0.112	0.009	0.879
252	GSM776230	GCB	GCB	GCB	0.877	0.091	0.032	0.877
468	GSM776446	ABC	GCB	GCB	0.877	0.107	0.016	0.877
22	GSM776000	GCB	GCB	GCB	0.876	0.117	0.007	0.876
451	GSM776429	GCB	GCB	GCB	0.876	0.103	0.021	0.876
261	GSM776239	ABC	GCB	GCB	0.875	0.107	0.019	0.875
361	GSM776339	GCB	GCB	GCB	0.875	0.119	0.006	0.875
124	GSM776102	GCB	GCB	GCB	0.874	0.092	0.034	0.874
155	GSM776133	GCB	GCB	GCB	0.874	0.107	0.02	0.874
105	GSM776083	GCB	GCB	GCB	0.872	0.123	0.004	0.872
255	GSM776233	GCB	GCB	GCB	0.872	0.113	0.015	0.872
315	GSM776293	GCB	GCB	GCB	0.872	0.126	0.002	0.872
453	GSM776431	GCB	GCB	GCB	0.872	0.128	0	0.872
366	GSM776344	GCB	GCB	GCB	0.871	0.008	0.121	0.871
39	GSM776017	GCB	GCB	GCB	0.87	0.127	0.003	0.87
218	GSM776196	ABC	GCB	GCB	0.87	0.099	0.031	0.87
338	GSM776316	GCB	GCB	GCB	0.87	0.099	0.03	0.87
347	GSM776325	GCB	GCB	GCB	0.87	0.095	0.035	0.87
399	GSM776377	GCB	GCB	GCB	0.87	0.097	0.033	0.87
419	GSM776397	ABC	TypeIII	GCB	0.866	0.016	0.118	0.866
211	GSM776189	GCB	GCB	GCB	0.864	0.025	0.111	0.864
491	GSM776469	GCB	GCB	GCB	0.863	0.124	0.013	0.863
153	GSM776131	GCB	GCB	GCB	0.862	0.103	0.035	0.862
262	GSM776240	GCB	GCB	GCB	0.861	0.012	0.127	0.861
216	GSM776194	ABC	GCB	GCB	0.859	0.103	0.038	0.859
188	GSM776166	ABC	TypeIII	GCB	0.858	0.006	0.135	0.858
213	GSM776191	GCB	GCB	GCB	0.858	0.133	0.009	0.858
416	GSM776394	GCB	GCB	GCB	0.856	0.096	0.048	0.856
276	GSM776254	GCB	GCB	GCB	0.855	0.143	0.002	0.855
413	GSM776391	GCB	GCB	GCB	0.855	0.111	0.034	0.855
375	GSM776353	GCB	GCB	GCB	0.852	0.124	0.024	0.852
385	GSM776363	GCB	GCB	GCB	0.852	0.131	0.016	0.852
284	GSM776262	GCB	GCB	GCB	0.85	0.113	0.037	0.85
321	GSM776299	ABC	TypeIII	GCB	0.844	0.03	0.126	0.844
388	GSM776366	GCB	GCB	GCB	0.844	0.124	0.032	0.844
191	GSM776169	GCB	GCB	GCB	0.843	0.022	0.135	0.843
324	GSM776302	GCB	GCB	GCB	0.84	0.124	0.035	0.84
376	GSM776354	GCB	GCB	GCB	0.84	0.14	0.02	0.84
128	GSM776106	GCB	GCB	GCB	0.839	0.116	0.045	0.839
221	GSM776199	GCB	GCB	GCB	0.839	0.146	0.016	0.839
293	GSM776271	GCB	GCB	GCB	0.838	0.006	0.156	0.838
265	GSM776243	GCB	GCB	GCB	0.837	0.154	0.009	0.837
268	GSM776246	ABC	GCB	GCB	0.836	0.127	0.037	0.836
496	GSM776474	GCB	GCB	GCB	0.835	0.14	0.025	0.835
1	GSM775979	GCB	GCB	GCB	0.833	0.114	0.053	0.833
84	GSM776062	ABC	TypeIII	GCB	0.832	0.127	0.041	0.832
204	GSM776182	GCB	GCB	GCB	0.831	0.038	0.131	0.831
43	GSM776021	GCB	GCB	GCB	0.83	0.008	0.163	0.83
443	GSM776421	GCB	GCB	GCB	0.828	0.137	0.035	0.828
91	GSM776069	ABC	GCB	GCB	0.827	0.164	0.009	0.827
108	GSM776086	GCB	GCB	GCB	0.827	0.114	0.059	0.827
465	GSM776443	ABC	GCB	GCB	0.825	0.146	0.029	0.825
93	GSM776071	ABC	TypeIII	GCB	0.823	0.023	0.154	0.823
60	GSM776038	GCB	GCB	GCB	0.822	0.175	0.002	0.822
121	GSM776099	GCB	GCB	GCB	0.821	0.031	0.148	0.821
383	GSM776361	GCB	GCB	GCB	0.821	0.158	0.021	0.821
406	GSM776384	GCB	GCB	GCB	0.821	0.164	0.015	0.821
377	GSM776355	GCB	GCB	GCB	0.82	0.098	0.082	0.82
5	GSM775983	GCB	GCB	GCB	0.819	0.15	0.032	0.819
241	GSM776219	GCB	GCB	GCB	0.819	0.174	0.007	0.819
13	GSM775991	GCB	GCB	GCB	0.818	0.168	0.014	0.818
109	GSM776087	ABC	TypeIII	GCB	0.818	0.014	0.168	0.818
264	GSM776242	GCB	GCB	GCB	0.818	0.175	0.007	0.818
250	GSM776228	GCB	GCB	GCB	0.817	0.127	0.057	0.817
412	GSM776390	GCB	GCB	GCB	0.817	0.131	0.052	0.817
158	GSM776136	GCB	GCB	GCB	0.816	0.166	0.018	0.816
341	GSM776319	GCB	TypeIII	GCB	0.816	0.008	0.176	0.816
292	GSM776270	ABC	ABC	GCB	0.814	0.028	0.158	0.814
253	GSM776231	GCB	GCB	GCB	0.813	0.142	0.045	0.813
426	GSM776404	GCB	GCB	GCB	0.812	0.012	0.176	0.812
37	GSM776015	GCB	GCB	GCB	0.811	0.151	0.038	0.811
126	GSM776104	GCB	GCB	GCB	0.809	0.15	0.041	0.809
198	GSM776176	GCB	GCB	GCB	0.809	0.132	0.059	0.809
237	GSM776215	GCB	GCB	GCB	0.809	0.152	0.038	0.809
422	GSM776400	GCB	GCB	GCB	0.809	0.157	0.034	0.809
234	GSM776212	ABC	TypeIII	GCB	0.806	0.135	0.058	0.806
100	GSM776078	GCB	GCB	GCB	0.802	0.159	0.038	0.802
474	GSM776452	GCB	GCB	GCB	0.794	0.017	0.189	0.794
380	GSM776358	GCB	GCB	GCB	0.789	0.205	0.005	0.789
41	GSM776019	GCB	GCB	GCB	0.784	0.19	0.026	0.784
199	GSM776177	GCB	GCB	GCB	0.784	0.215	0.001	0.784
205	GSM776183	GCB	GCB	GCB	0.784	0.008	0.208	0.784
257	GSM776235	GCB	GCB	GCB	0.784	0.213	0.004	0.784
243	GSM776221	GCB	GCB	GCB	0.783	0.149	0.068	0.783
360	GSM776338	GCB	TypeIII	GCB	0.783	0.167	0.051	0.783
103	GSM776081	GCB	GCB	GCB	0.779	0.216	0.005	0.779
97	GSM776075	ABC	GCB	GCB	0.778	0.012	0.21	0.778
478	GSM776456	GCB	TypeIII	GCB	0.778	0.062	0.16	0.778
471	GSM776449	GCB	GCB	GCB	0.775	0.156	0.069	0.775
49	GSM776027	GCB	GCB	GCB	0.772	0.037	0.191	0.772
26	GSM776004	GCB	GCB	GCB	0.769	0.221	0.01	0.769
165	GSM776143	GCB	TypeIII	GCB	0.769	0.018	0.212	0.769
186	GSM776164	GCB	GCB	GCB	0.762	0.196	0.042	0.762
214	GSM776192	ABC	GCB	GCB	0.757	0.041	0.201	0.757
425	GSM776403	GCB	GCB	GCB	0.751	0.159	0.089	0.751
67	GSM776045	ABC	ABC	GCB	0.744	0.15	0.106	0.744
80	GSM776058	GCB	GCB	GCB	0.744	0.21	0.046	0.744
166	GSM776144	GCB	GCB	GCB	0.738	0.225	0.037	0.738
436	GSM776414	GCB	GCB	GCB	0.738	0.053	0.209	0.738
162	GSM776140	GCB	TypeIII	GCB	0.732	0.057	0.211	0.732
171	GSM776149	GCB	GCB	GCB	0.73	0.262	0.008	0.73
325	GSM776303	ABC	GCB	GCB	0.728	0.057	0.215	0.728
427	GSM776405	GCB	GCB	GCB	0.725	0.243	0.032	0.725
148	GSM776126	GCB	GCB	GCB	0.722	0.275	0.002	0.722
411	GSM776389	GCB	GCB	GCB	0.719	0.226	0.055	0.719
56	GSM776034	GCB	GCB	GCB	0.715	0.265	0.02	0.715
222	GSM776200	GCB	GCB	GCB	0.715	0.028	0.257	0.715
132	GSM776110	GCB	GCB	GCB	0.708	0.223	0.069	0.708
392	GSM776370	GCB	GCB	GCB	0.705	0.219	0.076	0.705
48	GSM776026	GCB	GCB	GCB	0.704	0.071	0.225	0.704
94	GSM776072	GCB	GCB	GCB	0.704	0.097	0.2	0.704
273	GSM776251	ABC	TypeIII	GCB	0.704	0.21	0.086	0.704
134	GSM776112	GCB	GCB	GCB	0.7	0.294	0.006	0.7
403	GSM776381	GCB	GCB	GCB	0.698	0.232	0.07	0.698
484	GSM776462	ABC	ABC	GCB	0.696	0.08	0.224	0.696
62	GSM776040	GCB	GCB	GCB	0.694	0.289	0.017	0.694
154	GSM776132	ABC	ABC	GCB	0.693	0.25	0.056	0.693
157	GSM776135	ABC	ABC	GCB	0.688	0.077	0.235	0.688
50	GSM776028	GCB	TypeIII	GCB	0.686	0.216	0.097	0.686
107	GSM776085	GCB	ABC	GCB	0.68	0.17	0.15	0.68
469	GSM776447	ABC	ABC	GCB	0.678	0.161	0.161	0.678
24	GSM776002	GCB	GCB	GCB	0.672	0.257	0.071	0.672
445	GSM776423	GCB	GCB	GCB	0.67	0.32	0.011	0.67
487	GSM776465	ABC	TypeIII	GCB	0.66	0.251	0.089	0.66
79	GSM776057	GCB	GCB	GCB	0.657	0.125	0.218	0.657
336	GSM776314	ABC	ABC	GCB	0.656	0.113	0.231	0.656
189	GSM776167	GCB	GCB	GCB	0.654	0.235	0.111	0.654
247	GSM776225	GCB	TypeIII	GCB	0.652	0.196	0.152	0.652
36	GSM776014	ABC	ABC	GCB	0.648	0.114	0.237	0.648
141	GSM776119	GCB	GCB	GCB	0.645	0.336	0.019	0.645
294	GSM776272	GCB	ABC	GCB	0.644	0.027	0.329	0.644
112	GSM776090	GCB	GCB	GCB	0.643	0.221	0.137	0.643
367	GSM776345	GCB	GCB	GCB	0.643	0.345	0.012	0.643
446	GSM776424	ABC	ABC	GCB	0.643	0.215	0.142	0.643
117	GSM776095	GCB	ABC	GCB	0.636	0.259	0.105	0.636
449	GSM776427	GCB	GCB	GCB	0.636	0.302	0.062	0.636
482	GSM776460	GCB	GCB	GCB	0.634	0.236	0.13	0.634
231	GSM776209	GCB	GCB	GCB	0.631	0.246	0.124	0.631
350	GSM776328	GCB	GCB	GCB	0.628	0.348	0.024	0.628
391	GSM776369	GCB	ABC	GCB	0.628	0.009	0.363	0.628
2	GSM775980	GCB	GCB	GCB	0.625	0.338	0.037	0.625
486	GSM776464	ABC	ABC	GCB	0.618	0.086	0.296	0.618
460	GSM776438	ABC	TypeIII	GCB	0.617	0.263	0.12	0.617
133	GSM776111	GCB	TypeIII	GCB	0.615	0.06	0.325	0.615
150	GSM776128	GCB	GCB	GCB	0.615	0.342	0.043	0.615
104	GSM776082	GCB	GCB	GCB	0.613	0.153	0.234	0.613
280	GSM776258	ABC	TypeIII	GCB	0.613	0.317	0.07	0.613
373	GSM776351	GCB	TypeIII	GCB	0.599	0.096	0.305	0.599
236	GSM776214	GCB	GCB	GCB	0.597	0.353	0.049	0.597
277	GSM776255	GCB	GCB	GCB	0.596	0.343	0.061	0.596
92	GSM776070	GCB	GCB	GCB	0.593	0.392	0.015	0.593
28	GSM776006	GCB	GCB	GCB	0.589	0.376	0.034	0.589
423	GSM776401	ABC	ABC	GCB	0.587	0.238	0.174	0.587
215	GSM776193	GCB	GCB	GCB	0.583	0.057	0.36	0.583
351	GSM776329	GCB	GCB	GCB	0.582	0.402	0.016	0.582
197	GSM776175	GCB	GCB	GCB	0.581	0.358	0.061	0.581
9	GSM775987	ABC	ABC	GCB	0.579	0.324	0.097	0.579
129	GSM776107	ABC	ABC	GCB	0.574	0.308	0.117	0.574
407	GSM776385	ABC	GCB	GCB	0.571	0.008	0.421	0.571
372	GSM776350	GCB	TypeIII	GCB	0.57	0.209	0.221	0.57
44	GSM776022	ABC	TypeIII	GCB	0.563	0.053	0.384	0.563
275	GSM776253	ABC	TypeIII	GCB	0.553	0.086	0.36	0.553
147	GSM776125	ABC	ABC	GCB	0.538	0.185	0.277	0.538
295	GSM776273	ABC	TypeIII	GCB	0.538	0.108	0.354	0.538
309	GSM776287	ABC	GCB	GCB	0.536	0.43	0.033	0.536
83	GSM776061	ABC	ABC	GCB	0.534	0.126	0.34	0.534
11	GSM775989	ABC	TypeIII	GCB	0.533	0.442	0.025	0.533
483	GSM776461	GCB	GCB	GCB	0.529	0.184	0.287	0.529
450	GSM776428	ABC	GCB	GCB	0.528	0.469	0.003	0.528
21	GSM775999	GCB	GCB	GCB	0.527	0.388	0.086	0.527
192	GSM776170	GCB	GCB	GCB	0.523	0.468	0.009	0.523
125	GSM776103	ABC	ABC	GCB	0.518	0.01	0.471	0.518
272	GSM776250	GCB	GCB	GCB	0.508	0.027	0.465	0.508
167	GSM776145	ABC	GCB	GCB	0.505	0.469	0.026	0.505
466	GSM776444	ABC	GCB	GCB	0.498	0.085	0.417	0.498
393	GSM776371	ABC	ABC	GCB	0.497	0.187	0.316	0.497
297	GSM776275	GCB	ABC	GCB	0.493	0.382	0.126	0.493
286	GSM776264	ABC	GCB	GCB	0.492	0.45	0.057	0.492
333	GSM776311	GCB	GCB	GCB	0.488	0.037	0.475	0.488
177	GSM776155	GCB	ABC	GCB	0.484	0.146	0.37	0.484
463	GSM776441	ABC	ABC	GCB	0.484	0.156	0.36	0.484
306	GSM776284	ABC	ABC	GCB	0.483	0.205	0.312	0.483
71	GSM776049	ABC	ABC	GCB	0.482	0.348	0.17	0.482
342	GSM776320	GCB	GCB	GCB	0.475	0.25	0.275	0.475
328	GSM776306	GCB	GCB	GCB	0.472	0.428	0.101	0.472
131	GSM776109	ABC	TypeIII	GCB	0.464	0.419	0.118	0.464
317	GSM776295	ABC	ABC	GCB	0.458	0.101	0.441	0.458
185	GSM776163	GCB	GCB	GCB	0.434	0.136	0.43	0.434
89	GSM776067	ABC	ABC	GCB	0.432	0.193	0.375	0.432
159	GSM776137	ABC	TypeIII	GCB	0.431	0.334	0.236	0.431
169	GSM776147	GCB	GCB	GCB	0.419	0.385	0.196	0.419
343	GSM776321	GCB	ABC	GCB	0.405	0.356	0.239	0.405
410	GSM776388	GCB	GCB	TypeIII	0.885	0.885	0.103	0.012
270	GSM776248	GCB	GCB	TypeIII	0.87	0.87	0.009	0.122
101	GSM776079	GCB	GCB	TypeIII	0.866	0.866	0.008	0.126
142	GSM776120	GCB	GCB	TypeIII	0.849	0.849	0.142	0.009
176	GSM776154	GCB	GCB	TypeIII	0.848	0.848	0.126	0.026
17	GSM775995	ABC	GCB	TypeIII	0.847	0.847	0.037	0.115
291	GSM776269	ABC	ABC	TypeIII	0.847	0.847	0.031	0.122
31	GSM776009	GCB	GCB	TypeIII	0.836	0.836	0.017	0.147
195	GSM776173	GCB	GCB	TypeIII	0.835	0.835	0.019	0.146
354	GSM776332	GCB	TypeIII	TypeIII	0.833	0.833	0.008	0.159
51	GSM776029	GCB	GCB	TypeIII	0.832	0.832	0.029	0.139
156	GSM776134	GCB	GCB	TypeIII	0.822	0.822	0.054	0.124
95	GSM776073	ABC	GCB	TypeIII	0.81	0.81	0.058	0.132
497	GSM776475	NA	TypeIII	TypeIII	0.803	0.803	0.04	0.157
311	GSM776289	ABC	ABC	TypeIII	0.799	0.799	0.192	0.009
54	GSM776032	ABC	TypeIII	TypeIII	0.794	0.794	0.165	0.042
14	GSM775992	GCB	GCB	TypeIII	0.787	0.787	0.014	0.2
249	GSM776227	GCB	TypeIII	TypeIII	0.785	0.785	0.049	0.165
248	GSM776226	GCB	GCB	TypeIII	0.779	0.779	0.044	0.177
111	GSM776089	GCB	GCB	TypeIII	0.776	0.776	0.027	0.197
355	GSM776333	GCB	GCB	TypeIII	0.767	0.767	0.023	0.21
245	GSM776223	GCB	GCB	TypeIII	0.765	0.765	0.175	0.06
232	GSM776210	GCB	GCB	TypeIII	0.764	0.764	0.066	0.17
70	GSM776048	ABC	ABC	TypeIII	0.758	0.758	0.171	0.072
259	GSM776237	ABC	ABC	TypeIII	0.758	0.758	0.178	0.065
368	GSM776346	GCB	TypeIII	TypeIII	0.753	0.753	0.227	0.02
99	GSM776077	ABC	ABC	TypeIII	0.748	0.748	0.061	0.19
78	GSM776056	ABC	ABC	TypeIII	0.726	0.726	0.249	0.025
77	GSM776055	GCB	GCB	TypeIII	0.721	0.721	0.026	0.252
356	GSM776334	GCB	ABC	TypeIII	0.72	0.72	0.22	0.06
448	GSM776426	ABC	GCB	TypeIII	0.715	0.715	0.014	0.272
300	GSM776278	ABC	TypeIII	TypeIII	0.708	0.708	0.19	0.102
59	GSM776037	ABC	ABC	TypeIII	0.706	0.706	0.25	0.044
283	GSM776261	ABC	TypeIII	TypeIII	0.704	0.704	0.169	0.127
235	GSM776213	ABC	ABC	TypeIII	0.682	0.682	0.11	0.208
492	GSM776470	GCB	GCB	TypeIII	0.681	0.681	0.234	0.085
348	GSM776326	ABC	GCB	TypeIII	0.676	0.676	0.291	0.033
85	GSM776063	ABC	ABC	TypeIII	0.672	0.672	0.012	0.316
242	GSM776220	ABC	TypeIII	TypeIII	0.659	0.659	0.114	0.227
3	GSM775981	GCB	GCB	TypeIII	0.656	0.656	0.076	0.269
301	GSM776279	ABC	GCB	TypeIII	0.647	0.647	0.023	0.33
98	GSM776076	GCB	GCB	TypeIII	0.642	0.642	0.026	0.332
102	GSM776080	GCB	ABC	TypeIII	0.627	0.627	0.353	0.02
57	GSM776035	ABC	ABC	TypeIII	0.62	0.62	0.207	0.174
174	GSM776152	ABC	ABC	TypeIII	0.62	0.62	0.183	0.196
357	GSM776335	GCB	GCB	TypeIII	0.605	0.605	0.045	0.35
163	GSM776141	GCB	GCB	TypeIII	0.603	0.603	0.043	0.354
18	GSM775996	GCB	GCB	TypeIII	0.601	0.601	0.022	0.377
251	GSM776229	GCB	GCB	TypeIII	0.601	0.601	0.054	0.344
447	GSM776425	GCB	TypeIII	TypeIII	0.594	0.594	0.006	0.4
429	GSM776407	GCB	ABC	TypeIII	0.592	0.592	0.344	0.064
244	GSM776222	ABC	TypeIII	TypeIII	0.588	0.588	0.281	0.132
206	GSM776184	ABC	ABC	TypeIII	0.573	0.573	0.1	0.327
495	GSM776473	ABC	ABC	TypeIII	0.563	0.563	0.352	0.085
90	GSM776068	GCB	GCB	TypeIII	0.538	0.538	0.02	0.442
152	GSM776130	ABC	GCB	TypeIII	0.537	0.537	0.075	0.388
144	GSM776122	ABC	ABC	TypeIII	0.521	0.521	0.467	0.012
203	GSM776181	ABC	ABC	TypeIII	0.497	0.497	0.337	0.167
389	GSM776367	ABC	ABC	TypeIII	0.494	0.494	0.452	0.054
400	GSM776378	GCB	GCB	TypeIII	0.489	0.489	0.225	0.286
381	GSM776359	GCB	TypeIII	TypeIII	0.487	0.487	0.169	0.344
394	GSM776372	ABC	ABC	TypeIII	0.478	0.478	0.397	0.124
23	GSM776001	ABC	GCB	TypeIII	0.476	0.476	0.062	0.462
190	GSM776168	GCB	TypeIII	TypeIII	0.472	0.472	0.068	0.46
408	GSM776386	ABC	ABC	TypeIII	0.447	0.447	0.366	0.188
96	GSM776074	ABC	TypeIII	TypeIII	0.444	0.444	0.212	0.344
66	GSM776044	GCB	TypeIII	TypeIII	0.415	0.415	0.257	0.328
15	GSM775993	ABC	ABC	TypeIII	0.411	0.411	0.305	0.284
415	GSM776393	GCB	GCB	TypeIII	0.41	0.41	0.261	0.33
145	GSM776123	ABC	ABC	TypeIII	0.397	0.397	0.293	0.31
151	GSM776129	ABC	ABC	TypeIII	0.394	0.394	0.392	0.214

## Sheet: GSE32918
									WRIGHT TRAINED
	Meta Info								Wright Trained, Classifier Selection
GEO_Number	OriginalOrder	Age	Sex	ActiveTreatment	Follow-up	Follow-up Status	ClassLMT_J48_RF100_SMO	MaxConf	ClassBayesNet	TypeIII	ABC	GCB	ClassBFTree	TypeIII	ABC	GCB	ClassFT	TypeIII	ABC	GCB	ClassJ48	TypeIII	ABC	GCB	ClassLMT	TypeIII	ABC	GCB	ClassNBTree	TypeIII	ABC	GCB	ClassRandomTree	TypeIII	ABC	GCB	ClassREPTree	TypeIII	ABC	GCB	ClassRF100	TypeIII	ABC	GCB	ClassRF200	TypeIII	ABC	GCB	ClassSimpleCart
65	172	77.6438	male	1	0.342231	1	ABC	0.892	ABC	0	1	0	ABC	0	0.968	0.032	TypeIII	0.842	0.158	0	ABC	0.016	0.984	0	ABC	0.038	0.953	0.008	ABC	0.024	0.892	0.084	ABC	0	1	0	ABC	0.086	0.803	0.112	ABC	0.024	0.965	0.011	ABC	0.022	0.968	0.011	ABC
104	171	80.4244	male	1	0.388775	1	ABC	0.892	ABC	0	1	0	ABC	0.058	0.923	0.019	ABC	0	1	0	ABC	0.016	0.984	0	ABC	0.01	0.99	0.001	ABC	0.033	0.944	0.022	GCB	0	0	1	ABC	0.086	0.803	0.112	ABC	0.07	0.928	0.002	ABC	0.05	0.949	0.001	ABC
98	170	77.4237	male	0	0.104038	1	ABC	0.889	ABC	0	1	0	ABC	0	0.968	0.032	ABC	0	1	0	ABC	0.016	0.984	0	ABC	0.02	0.974	0.006	ABC	0.024	0.892	0.084	ABC	0	1	0	ABC	0.086	0.803	0.112	ABC	0.02	0.933	0.047	ABC	0.02	0.951	0.029	ABC
46	168	72.679	female	1	0.0821	1	ABC	0.862	ABC	0	1	0	GCB	0	0	1	ABC	0	1	0	ABC	0.016	0.984	0	ABC	0.001	0.994	0.004	ABC	0.033	0.944	0.022	ABC	0	1	0	ABC	0.086	0.803	0.112	ABC	0.111	0.804	0.085	ABC	0.134	0.788	0.078	GCB
114	167	77.9384	male	1	0.596851	1	ABC	0.853	ABC	0.004	0.996	0	ABC	0.058	0.923	0.019	ABC	0.006	0.994	0	ABC	0.016	0.984	0	ABC	0.059	0.93	0.011	ABC	0.001	0.994	0.006	ABC	0	1	0	ABC	0.086	0.803	0.112	ABC	0.157	0.833	0.01	ABC	0.152	0.829	0.019	ABC
85	169	91.737	female	0	0.0164	1	ABC	0.849	ABC	0	1	0	ABC	0.058	0.923	0.019	ABC	0	1	0	ABC	0.096	0.904	0	ABC	0.062	0.935	0.003	ABC	0.033	0.944	0.022	ABC	0	1	0	ABC	0.086	0.803	0.112	ABC	0.108	0.892	0	ABC	0.087	0.903	0.01	ABC
165	166	76.668	male	1	1.21287	1	ABC	0.844	ABC	0	1	0	ABC	0.058	0.923	0.019	ABC	0	1	0	ABC	0.016	0.984	0	ABC	0.133	0.862	0.005	ABC	0.001	0.994	0.006	ABC	0	1	0	ABC	0.086	0.803	0.112	ABC	0.101	0.861	0.038	ABC	0.13	0.841	0.029	ABC
47	165	65.7276	male	1	6.40383	0	ABC	0.821	ABC	0	1	0	ABC	0.058	0.923	0.019	ABC	0	1	0	ABC	0.016	0.984	0	ABC	0.112	0.845	0.043	ABC	0.016	0.944	0.04	ABC	0	1	0	ABC	0.086	0.803	0.112	ABC	0.12	0.786	0.094	ABC	0.132	0.776	0.092	ABC
36	164	57.5151	male	1	2.81451	0	ABC	0.808	ABC	0	1	0	ABC	0	0.968	0.032	ABC	0.092	0.908	0	ABC	0.096	0.904	0	ABC	0.02	0.885	0.095	ABC	0.024	0.892	0.084	ABC	0	1	0	GCB	0.084	0.177	0.739	ABC	0.061	0.775	0.164	ABC	0.051	0.801	0.149	ABC
134	159	34.9726	male	1	4.01095	1	ABC	0.805	ABC	0.086	0.907	0.006	ABC	0	0.968	0.032	ABC	0.002	0.998	0	ABC	0.016	0.984	0	ABC	0.023	0.941	0.036	GCB	0.217	0.123	0.66	GCB	0	0	1	ABC	0.086	0.803	0.112	ABC	0.135	0.629	0.236	ABC	0.147	0.646	0.207	ABC
48	163	81.9712	female	0	5.17728	0	ABC	0.791	ABC	0	1	0	ABC	0	0.968	0.032	ABC	0	1	0	ABC	0.016	0.984	0	ABC	0.182	0.743	0.074	ABC	0.024	0.892	0.084	ABC	0	1	0	ABC	0.086	0.803	0.112	ABC	0.048	0.771	0.182	ABC	0.061	0.771	0.168	ABC
162	161	76.4244	female	1	5.63724	0	ABC	0.791	ABC	0.015	0.985	0	ABC	0	1	0	ABC	0	1	0	ABC	0.225	0.775	0	ABC	0.053	0.946	0.001	TypeIII	0.823	0.025	0.152	ABC	0	1	0	ABC	0.086	0.803	0.112	ABC	0.175	0.776	0.05	ABC	0.236	0.724	0.041	ABC
101	160	76.4107	male	1	4.37235	1	ABC	0.785	ABC	0.024	0.976	0	ABC	0.058	0.923	0.019	ABC	0.057	0.943	0	ABC	0.016	0.984	0	ABC	0.238	0.714	0.048	ABC	0.02	0.98	0	TypeIII	1	0	0	ABC	0.086	0.803	0.112	ABC	0.214	0.776	0.01	ABC	0.22	0.758	0.022	ABC
140	153	77.8015	male	0	0.788501	1	ABC	0.78	TypeIII	0.567	0.428	0.005	ABC	0	0.968	0.032	ABC	0.007	0.993	0	ABC	0.016	0.984	0	ABC	0.1	0.864	0.036	ABC	0.024	0.892	0.084	ABC	0	1	0	ABC	0.086	0.803	0.112	ABC	0.264	0.607	0.128	ABC	0.227	0.657	0.116	ABC
20	149	64.6274	female	1	3.3128	0	ABC	0.776	ABC	0.022	0.978	0	TypeIII	0.973	0	0.027	ABC	0.251	0.749	0	ABC	0.016	0.984	0	ABC	0.117	0.813	0.069	ABC	0.267	0.731	0.002	TypeIII	1	0	0	ABC	0.086	0.803	0.112	ABC	0.15	0.64	0.21	ABC	0.129	0.633	0.238	TypeIII
80	162	94.0959	female	0	0.301164	1	ABC	0.773	ABC	0	1	0	ABC	0.058	0.923	0.019	ABC	0.001	0.999	0	ABC	0	0.848	0.152	ABC	0.229	0.759	0.011	ABC	0.003	0.997	0	TypeIII	1	0	0	ABC	0.086	0.803	0.112	ABC	0.111	0.817	0.071	ABC	0.073	0.832	0.095	ABC
59	154	63.126	male	0	0.0438056	1	ABC	0.771	ABC	0.009	0.991	0	ABC	0.058	0.923	0.019	ABC	0.143	0.857	0	ABC	0.016	0.984	0	ABC	0.156	0.824	0.02	ABC	0.001	0.994	0.006	TypeIII	1	0	0	ABC	0.086	0.803	0.112	ABC	0.191	0.611	0.199	ABC	0.162	0.708	0.13	ABC
127	150	85.5332	female	0	2.5462	1	ABC	0.771	ABC	0	1	0	ABC	0	0.968	0.032	ABC	0	1	0	ABC	0.096	0.904	0	ABC	0.004	0.879	0.116	ABC	0.033	0.944	0.022	ABC	0	1	0	GCB	0.084	0.177	0.739	ABC	0.015	0.633	0.352	ABC	0.017	0.646	0.337	ABC
69	158	66.2849	male	1	4.97194	1	ABC	0.77	ABC	0.009	0.991	0	GCB	0	0	1	TypeIII	0.969	0.031	0	ABC	0	0.848	0.152	ABC	0.19	0.796	0.014	GCB	0.242	0.022	0.736	ABC	0	1	0	ABC	0.086	0.803	0.112	ABC	0.147	0.77	0.083	ABC	0.174	0.749	0.077	GCB
125	151	68.2327	male	1	5.01027	0	ABC	0.768	ABC	0	1	0	ABC	0.058	0.923	0.019	ABC	0	1	0	ABC	0.096	0.904	0	ABC	0.006	0.818	0.176	ABC	0.001	0.994	0.006	ABC	0	1	0	ABC	0.086	0.803	0.112	ABC	0.022	0.681	0.297	ABC	0.016	0.685	0.299	ABC
155	147	82.7918	male	1	0.654346	1	ABC	0.768	ABC	0	0.991	0.009	ABC	0	0.968	0.032	ABC	0	1	0	ABC	0.096	0.904	0	ABC	0.005	0.942	0.053	TypeIII	0.823	0.025	0.152	ABC	0	1	0	GCB	0.084	0.177	0.739	ABC	0.069	0.56	0.371	ABC	0.048	0.615	0.337	ABC
118	148	84.6461	male	0	0.00821	1	ABC	0.766	ABC	0	1	0	GCB	0	0.039	0.961	ABC	0.082	0.918	0	ABC	0.225	0.775	0	ABC	0.053	0.921	0.026	ABC	0.199	0.566	0.236	TypeIII	0.975	0	0.025	ABC	0.086	0.803	0.112	ABC	0.138	0.7	0.161	ABC	0.137	0.677	0.186	GCB
41	156	86.6283	male	0	0.00821	1	ABC	0.761	ABC	0.002	0.998	0	ABC	0.058	0.923	0.019	GCB	0.394	0.001	0.605	ABC	0	0.848	0.152	ABC	0.121	0.703	0.176	ABC	0.033	0.944	0.022	ABC	0	1	0	ABC	0.086	0.803	0.112	ABC	0.117	0.827	0.057	ABC	0.127	0.786	0.087	ABC
70	152	65.6318	male	1	0.717317	1	ABC	0.753	ABC	0.021	0.979	0	ABC	0.058	0.923	0.019	ABC	0	1	0	ABC	0.096	0.904	0	ABC	0.227	0.683	0.089	ABC	0.001	0.994	0.006	ABC	0	1	0	GCB	0.084	0.177	0.739	ABC	0.147	0.757	0.096	ABC	0.156	0.764	0.08	ABC
103	144	73.629	male	1	1.41273	1	ABC	0.752	ABC	0.004	0.996	0	TypeIII	0.973	0	0.027	ABC	0.001	0.999	0	ABC	0.096	0.904	0	ABC	0.152	0.836	0.011	ABC	0.033	0.887	0.08	ABC	0	1	0	GCB	0.084	0.177	0.739	ABC	0.306	0.6	0.095	ABC	0.309	0.568	0.123	TypeIII
113	157	66.3135	male	1	5.3744	0	ABC	0.752	ABC	0.011	0.989	0	ABC	0.058	0.923	0.019	ABC	0.293	0.707	0	ABC	0	0.848	0.152	ABC	0.36	0.618	0.021	ABC	0.001	0.994	0.006	ABC	0	1	0	ABC	0.086	0.803	0.112	ABC	0.079	0.874	0.047	ABC	0.101	0.856	0.043	ABC
45	155	68.4381	male	1	0.164271	1	ABC	0.749	ABC	0	1	0	GCB	0.034	0.04	0.927	ABC	0.007	0.993	0	ABC	0	0.838	0.162	ABC	0.134	0.709	0.157	ABC	0.033	0.944	0.022	ABC	0	1	0	ABC	0.086	0.803	0.112	ABC	0.1	0.782	0.118	ABC	0.072	0.821	0.106	GCB
25	140	69.463	male	1	0.44627	1	ABC	0.732	ABC	0	1	0	GCB	0.034	0.04	0.927	TypeIII	0.987	0.013	0	ABC	0	0.838	0.162	ABC	0.081	0.736	0.183	ABC	0.024	0.892	0.084	ABC	0	1	0	GCB	0.084	0.177	0.739	ABC	0.09	0.686	0.224	ABC	0.068	0.673	0.259	GCB
163	139	79.7344	female	1	0.21629	1	ABC	0.727	ABC	0.006	0.994	0	TypeIII	0.973	0	0.027	ABC	0	1	0	ABC	0.096	0.904	0	ABC	0.22	0.768	0.013	TypeIII	0.4	0.356	0.244	GCB	0	0	1	GCB	0.084	0.177	0.739	ABC	0.283	0.57	0.148	ABC	0.312	0.551	0.137	TypeIII
86	142	59.1644	male	1	2.26146	1	ABC	0.724	ABC	0.084	0.896	0.02	ABC	0	1	0	ABC	0	1	0	ABC	0.225	0.775	0	ABC	0.219	0.75	0.031	TypeIII	0.641	0.058	0.301	ABC	0	1	0	ABC	0.086	0.803	0.112	ABC	0.14	0.703	0.157	ABC	0.189	0.665	0.146	ABC
105	145	71.4552	male	1	0.265572	1	ABC	0.724	ABC	0.003	0.997	0	GCB	0	0	1	TypeIII	0.735	0.265	0	ABC	0.096	0.904	0	ABC	0.157	0.719	0.124	GCB	0.242	0.022	0.736	ABC	0	1	0	ABC	0.086	0.803	0.112	ABC	0.163	0.604	0.233	ABC	0.142	0.66	0.198	GCB
148	135	71.3397	female	1	3.60301	0	ABC	0.712	ABC	0	1	0	ABC	0	0.968	0.032	ABC	0	1	0	ABC	0.096	0.904	0	ABC	0.005	0.7	0.295	GCB	0.084	0.282	0.634	GCB	0	0	1	GCB	0.084	0.177	0.739	ABC	0.02	0.575	0.405	ABC	0.02	0.544	0.436	ABC
87	143	71.1863	female	1	6.86379	0	ABC	0.708	ABC	0.039	0.961	0	ABC	0.058	0.923	0.019	TypeIII	0.839	0.156	0.005	ABC	0.016	0.984	0	TypeIII	0.545	0.413	0.043	ABC	0.021	0.979	0	TypeIII	1	0	0	ABC	0.086	0.803	0.112	ABC	0.176	0.767	0.057	ABC	0.217	0.728	0.055	ABC
54	136	72.0712	male	0	-0.00548	1	ABC	0.7	ABC	0.129	0.758	0.113	ABC	0	0.968	0.032	TypeIII	0.96	0.04	0	ABC	0.016	0.984	0	ABC	0.133	0.722	0.145	ABC	0.108	0.877	0.015	TypeIII	1	0	0	ABC	0.086	0.803	0.112	ABC	0.306	0.428	0.266	ABC	0.268	0.497	0.235	ABC
138	133	69.0521	male	1	0.52293	1	ABC	0.679	ABC	0	0.868	0.132	ABC	0	0.968	0.032	ABC	0	1	0	ABC	0.096	0.904	0	ABC	0.003	0.711	0.286	GCB	0.084	0.282	0.634	ABC	0	1	0	GCB	0.084	0.177	0.739	GCB	0.044	0.435	0.521	GCB	0.047	0.408	0.545	ABC
71	138	77.8959	female	1	3.87406	1	ABC	0.672	ABC	0	1	0	ABC	0.058	0.923	0.019	TypeIII	0.981	0.015	0.004	ABC	0	0.848	0.152	TypeIII	0.559	0.43	0.011	ABC	0.023	0.977	0	ABC	0	1	0	ABC	0.086	0.803	0.112	ABC	0.247	0.743	0.01	ABC	0.231	0.764	0.005	ABC
142	146	86.1218	male	0	4.20534	1	ABC	0.669	ABC	0.071	0.834	0.094	ABC	0	0.968	0.032	ABC	0.22	0.78	0	ABC	0.016	0.984	0	ABC	0.143	0.752	0.106	GCB	0.067	0.224	0.71	ABC	0	1	0	ABC	0.086	0.803	0.112	ABC	0.118	0.608	0.274	ABC	0.148	0.632	0.219	ABC
151	141	74.6119	male	1	5.78508	0	ABC	0.629	ABC	0.116	0.851	0.033	ABC	0.058	0.923	0.019	TypeIII	0.958	0	0.042	ABC	0.016	0.984	0	ABC	0.343	0.522	0.136	ABC	0.033	0.944	0.022	ABC	0	1	0	ABC	0.086	0.803	0.112	ABC	0.162	0.678	0.16	ABC	0.184	0.65	0.166	ABC
126	134	66.1246	male	1	5.96304	0	ABC	0.625	GCB	0.012	0.218	0.769	ABC	0	0.968	0.032	GCB	0.027	0.032	0.94	ABC	0.016	0.984	0	ABC	0.065	0.744	0.192	TypeIII	0.662	0.296	0.042	TypeIII	1	0	0	ABC	0.086	0.803	0.112	GCB	0.072	0.44	0.489	GCB	0.088	0.45	0.462	ABC
82	137	60.3836	male	1	3.77823	1	ABC	0.594	ABC	0.002	0.998	0	ABC	0.058	0.923	0.019	TypeIII	0.79	0.022	0.189	ABC	0.016	0.984	0	ABC	0.329	0.38	0.291	TypeIII	0.825	0.173	0.002	TypeIII	1	0	0	ABC	0.086	0.803	0.112	ABC	0.149	0.676	0.175	ABC	0.179	0.648	0.173	ABC
122	132	64.4682	male	1	6.0397	0	ABC	0.58	ABC	0	1	0	GCB	0.034	0.04	0.927	ABC	0	1	0	GCB	0	0	1	ABC	0.008	0.934	0.058	ABC	0.033	0.944	0.022	ABC	0	1	0	ABC	0.086	0.803	0.112	ABC	0.027	0.72	0.254	ABC	0.013	0.714	0.273	GCB
156	125	66.0685	female	1	4.69815	1	ABC	0.564	ABC	0.043	0.75	0.206	GCB	0	0.039	0.961	TypeIII	0.944	0.04	0.016	ABC	0.225	0.775	0	ABC	0.369	0.498	0.133	TypeIII	0.679	0.295	0.026	GCB	0	0	1	TypeIII	0.855	0.145	0	GCB	0.259	0.318	0.423	GCB	0.287	0.318	0.395	GCB
5	131	96.3477	male	0	0.175223	1	ABC	0.558	ABC	0	1	0	ABC	0.058	0.923	0.019	ABC	0	1	0	GCB	0	0.111	0.889	ABC	0.061	0.893	0.046	ABC	0.031	0.946	0.022	GCB	0	0	1	GCB	0.084	0.177	0.739	ABC	0.05	0.56	0.39	ABC	0.046	0.598	0.356	ABC
110	130	76.5667	male	1	5.38262	0	ABC	0.538	TypeIII	0.986	0.007	0.007	ABC	0.058	0.923	0.019	TypeIII	0.957	0.011	0.032	ABC	0	0.848	0.152	ABC	0.302	0.647	0.051	TypeIII	0.906	0.039	0.055	TypeIII	1	0	0	GCB	0.201	0.074	0.726	TypeIII	0.54	0.324	0.136	TypeIII	0.411	0.374	0.215	ABC
30	128	85.9753	female	0	3.1102	1	ABC	0.531	ABC	0	0.998	0.002	GCB	0	0	1	ABC	0.002	0.998	0	GCB	0	0.111	0.889	ABC	0.041	0.859	0.101	ABC	0.269	0.691	0.04	ABC	0	1	0	GCB	0.084	0.177	0.739	ABC	0.041	0.487	0.472	ABC	0.065	0.505	0.43	GCB
130	127	58.5407	male	1	4.96372	0	ABC	0.496	TypeIII	0.999	0	0.001	TypeIII	0.973	0	0.027	ABC	0.071	0.927	0.002	ABC	0.016	0.984	0	TypeIII	0.479	0.364	0.157	GCB	0.217	0.123	0.66	ABC	0	1	0	GCB	0.201	0.074	0.726	TypeIII	0.574	0.304	0.121	TypeIII	0.637	0.257	0.106	TypeIII
28	129	56.1973	female	1	1.28405	1	ABC	0.493	TypeIII	0.914	0.001	0.085	GCB	0	0.039	0.961	TypeIII	1	0	0	ABC	0.225	0.775	0	ABC	0.311	0.496	0.193	TypeIII	0.679	0.295	0.026	TypeIII	1	0	0	ABC	0.086	0.803	0.112	TypeIII	0.468	0.369	0.164	TypeIII	0.466	0.358	0.176	GCB
117	117	78.037	female	0	-0.0383	1	ABC	0.433	TypeIII	0.966	0.01	0.024	GCB	0.019	0	0.981	ABC	0.228	0.55	0.223	TypeIII	0.805	0.065	0.13	ABC	0.201	0.677	0.122	GCB	0.08	0.257	0.664	ABC	0	1	0	GCB	0.043	0.016	0.941	GCB	0.32	0.324	0.356	TypeIII	0.367	0.308	0.325	GCB
111	120	72.9172	male	1	3.03628	1	ABC	0.425	ABC	0.164	0.836	0	ABC	0.058	0.923	0.019	TypeIII	0.996	0.004	0	GCB	0	0.111	0.889	TypeIII	0.479	0.461	0.06	TypeIII	0.521	0.425	0.054	TypeIII	1	0	0	GCB	0.084	0.177	0.739	ABC	0.353	0.461	0.186	ABC	0.3	0.459	0.241	ABC
31	122	83.7865	female	0	0.0411	1	ABC	0.406	GCB	0.031	0.012	0.956	ABC	0	0.968	0.032	TypeIII	0.515	0.186	0.299	ABC	0.225	0.775	0	GCB	0.25	0.237	0.513	GCB	0.291	0.007	0.702	GCB	0	0	1	ABC	0.086	0.803	0.112	GCB	0.297	0.278	0.426	GCB	0.322	0.319	0.359	ABC
15	2	71.9096	male	1	4.81588	0	GCB	0.911	GCB	0	0	1	GCB	0.034	0.04	0.927	GCB	0	0	1	GCB	0.009	0.013	0.978	GCB	0.001	0	0.999	GCB	0.021	0.021	0.959	GCB	0	0	1	GCB	0.043	0.016	0.941	GCB	0	0	1	GCB	0.004	0	0.996	GCB
42	1	71.8932	male	1	0.558522	1	GCB	0.911	GCB	0	0	1	GCB	0.034	0.04	0.927	GCB	0	0	1	GCB	0.009	0.013	0.978	GCB	0.001	0.001	0.999	GCB	0.021	0.021	0.959	GCB	0	0	1	GCB	0.043	0.016	0.941	GCB	0	0	1	GCB	0	0	1	GCB
9	6	58.7324	male	1	0.542095	1	GCB	0.908	GCB	0	0	1	GCB	0.034	0.04	0.927	GCB	0	0	1	GCB	0.009	0.013	0.978	GCB	0.001	0	0.999	GCB	0.021	0.021	0.959	GCB	0	0	1	GCB	0.043	0.016	0.941	GCB	0.01	0	0.99	GCB	0.01	0.005	0.985	GCB
75	5	73.3808	female	1	1.2512	1	GCB	0.908	GCB	0	0	1	GCB	0.034	0.04	0.927	GCB	0	0	1	GCB	0.009	0.013	0.978	GCB	0	0	1	GCB	0.017	0.001	0.982	GCB	0	0	1	GCB	0.043	0.016	0.941	GCB	0.01	0	0.99	GCB	0.015	0	0.985	GCB
137	3	76.4189	male	1	0.0821	1	GCB	0.908	GCB	0	0	1	GCB	0.034	0.04	0.927	GCB	0	0	1	GCB	0.009	0.013	0.978	GCB	0.003	0.007	0.989	GCB	0.021	0.021	0.959	GCB	0	0	1	GCB	0.043	0.016	0.941	GCB	0	0	1	GCB	0.005	0.005	0.99	GCB
39	8	68.2601	female	1	6.43942	0	GCB	0.906	GCB	0	0	1	GCB	0.034	0.04	0.927	GCB	0	0	1	GCB	0.009	0.013	0.978	GCB	0.001	0	0.999	GCB	0.021	0.021	0.959	GCB	0	0	1	GCB	0.043	0.016	0.941	GCB	0	0.019	0.981	GCB	0	0.01	0.99	GCB
67	4	71.0767	female	1	6.34908	0	GCB	0.906	GCB	0	0	1	GCB	0.034	0.04	0.927	GCB	0	0	1	GCB	0.009	0.013	0.978	GCB	0.006	0.001	0.994	GCB	0.001	0	0.999	GCB	0	0	1	GCB	0.043	0.016	0.941	GCB	0.01	0.002	0.988	GCB	0.005	0.006	0.989	GCB
44	7	67.603	male	1	4.67899	0	GCB	0.905	GCB	0	0	1	GCB	0.034	0.04	0.927	GCB	0	0	1	GCB	0.009	0.013	0.978	GCB	0.004	0	0.996	GCB	0.021	0.021	0.959	GCB	0	0	1	GCB	0.043	0.016	0.941	GCB	0.009	0.009	0.981	GCB	0.005	0.005	0.991	GCB
146	11	58.3901	male	1	4.8679	0	GCB	0.902	GCB	0	0	1	GCB	0.034	0.04	0.927	GCB	0	0	1	GCB	0	0	1	GCB	0.026	0.001	0.973	GCB	0.021	0.021	0.959	GCB	0	0	1	GCB	0.043	0.016	0.941	GCB	0.03	0	0.97	GCB	0.025	0.013	0.962	GCB
153	14	75.9452	male	1	4.82957	0	GCB	0.901	GCB	0	0	1	GCB	0.034	0.04	0.927	GCB	0	0	1	GCB	0.009	0.013	0.978	GCB	0.002	0.002	0.996	GCB	0.001	0	0.999	GCB	0	0	1	GCB	0.084	0.177	0.739	GCB	0.017	0.02	0.963	GCB	0.019	0.028	0.953	GCB
24	10	77.3397	male	1	2.70226	1	GCB	0.9	GCB	0	0	1	GCB	0.034	0.04	0.927	GCB	0	0	1	GCB	0.009	0.013	0.978	GCB	0.011	0.014	0.975	GCB	0.005	0	0.994	GCB	0	0	1	GCB	0.043	0.016	0.941	GCB	0.01	0.01	0.98	GCB	0.012	0.011	0.977	GCB
34	9	82.6995	male	0	0.120465	1	GCB	0.9	GCB	0	0	1	GCB	0.034	0.04	0.927	GCB	0	0	1	GCB	0.009	0.013	0.978	GCB	0.009	0.006	0.986	GCB	0.021	0.021	0.959	GCB	0	0	1	GCB	0.043	0.016	0.941	GCB	0.03	0	0.97	GCB	0.02	0.009	0.971	GCB
61	12	71.7534	female	1	6.41752	0	GCB	0.9	GCB	0	0	1	GCB	0.034	0.04	0.927	GCB	0	0	1	GCB	0.009	0.013	0.978	GCB	0.006	0.004	0.99	GCB	0.021	0.021	0.959	GCB	0	0	1	GCB	0.043	0.016	0.941	GCB	0.017	0.016	0.966	GCB	0.016	0.013	0.971	GCB
143	13	65.6932	female	1	0.692676	1	GCB	0.9	GCB	0	0	1	GCB	0.034	0.04	0.927	GCB	0	0	1	GCB	0.009	0.013	0.978	GCB	0.01	0.004	0.986	GCB	0.001	0	0.999	GCB	0	0	1	GCB	0.084	0.177	0.739	GCB	0.01	0.019	0.971	GCB	0.02	0.019	0.961	GCB
90	16	56.589	male	1	1.7577	1	GCB	0.898	GCB	0	0	1	GCB	0.034	0.04	0.927	GCB	0	0	1	GCB	0.009	0.013	0.978	GCB	0	0.003	0.997	TypeIII	0.6	0.267	0.133	GCB	0	0	1	GCB	0.084	0.177	0.739	GCB	0.027	0.02	0.953	GCB	0.014	0.03	0.956	GCB
152	18	59.9452	female	1	2.4449	1	GCB	0.896	GCB	0	0	1	GCB	0.034	0.04	0.927	GCB	0	0	1	GCB	0.009	0.013	0.978	GCB	0.001	0.001	0.998	GCB	0.002	0	0.998	GCB	0	0	1	GCB	0.043	0.016	0.941	GCB	0.043	0.016	0.941	GCB	0.035	0.008	0.957	GCB
107	17	62.037	female	1	0.629706	1	GCB	0.893	GCB	0	0	1	GCB	0.034	0.04	0.927	GCB	0	0	1	GCB	0.009	0.013	0.978	GCB	0.006	0.009	0.985	GCB	0.021	0.021	0.959	GCB	0	0	1	GCB	0.043	0.016	0.941	GCB	0.043	0.016	0.941	GCB	0.025	0.035	0.94	GCB
72	15	57.1699	female	1	6.07529	0	GCB	0.889	GCB	0	0	1	GCB	0	0.039	0.961	GCB	0	0	1	GCB	0	0.111	0.889	GCB	0.001	0	0.999	GCB	0.021	0.021	0.959	GCB	0	0	1	GCB	0.043	0.016	0.941	GCB	0	0	1	GCB	0	0.005	0.995	GCB
56	20	71.5428	male	1	6.00137	0	GCB	0.886	GCB	0	0	1	GCB	0.034	0.04	0.927	GCB	0	0	1	GCB	0.009	0.013	0.978	GCB	0.005	0.038	0.957	GCB	0.021	0.021	0.959	GCB	0	0	1	GCB	0.084	0.177	0.739	GCB	0.017	0.04	0.943	GCB	0.011	0.045	0.944	GCB
132	19	64.6384	female	1	6.86379	0	GCB	0.883	GCB	0	0	1	GCB	0.034	0.04	0.927	GCB	0	0	1	GCB	0.009	0.013	0.978	GCB	0.051	0.006	0.943	GCB	0.001	0	0.999	GCB	0	0	1	GCB	0.043	0.016	0.941	GCB	0	0.057	0.943	GCB	0.01	0.04	0.95	GCB
141	27	69.0349	male	1	2.19849	1	GCB	0.879	GCB	0	0	1	GCB	0.034	0.04	0.927	GCB	0	0	1	GCB	0.009	0.013	0.978	GCB	0.001	0	0.999	TypeIII	0.6	0.267	0.133	ABC	0	1	0	GCB	0.084	0.177	0.739	GCB	0.027	0.1	0.873	GCB	0.033	0.06	0.907	GCB
172	29	78.2149	male	0	0.0192	1	GCB	0.879	GCB	0	0	1	GCB	0	0	1	GCB	0	0	1	GCB	0.009	0.013	0.978	GCB	0	0	1	GCB	0.003	0.023	0.974	TypeIII	1	0	0	GCB	0.043	0.016	0.941	GCB	0.097	0.029	0.873	GCB	0.084	0.033	0.883	GCB
55	21	55.4606	male	1	4.76934	0	GCB	0.878	GCB	0.003	0	0.997	GCB	0.034	0.04	0.927	GCB	0	0	1	GCB	0.009	0.013	0.978	GCB	0.029	0.001	0.97	GCB	0.001	0	0.999	GCB	0	0	1	GCB	0.201	0.074	0.726	GCB	0.08	0.023	0.897	GCB	0.085	0.025	0.891	GCB
139	25	61.5578	female	1	5.80972	0	GCB	0.878	GCB	0	0	1	GCB	0	0.039	0.961	GCB	0	0	1	GCB	0	0.111	0.889	GCB	0	0	1	GCB	0.021	0.021	0.959	GCB	0	0	1	GCB	0.043	0.016	0.941	GCB	0	0.044	0.956	GCB	0.01	0.037	0.953	GCB
84	24	84.3562	male	0	0.0766598	1	GCB	0.875	GCB	0	0	1	GCB	0	0.039	0.961	GCB	0	0	1	GCB	0	0.111	0.889	GCB	0.001	0.003	0.996	GCB	0.021	0.021	0.959	GCB	0	0	1	GCB	0.084	0.177	0.739	GCB	0.022	0.03	0.948	GCB	0.021	0.05	0.929	GCB
53	31	55.5455	male	1	4.85147	0	GCB	0.873	GCB	0	0	1	GCB	0.034	0.04	0.927	GCB	0	0	1	GCB	0.009	0.013	0.978	GCB	0.01	0.014	0.976	GCB	0.017	0.001	0.982	GCB	0	0	1	ABC	0.086	0.803	0.112	GCB	0.046	0.083	0.871	GCB	0.059	0.052	0.889	GCB
83	36	71.0301	female	1	6.90212	0	GCB	0.873	GCB	0	0	1	GCB	0.034	0.04	0.927	GCB	0	0	1	GCB	0.009	0.013	0.978	GCB	0.005	0.001	0.994	GCB	0.002	0	0.998	GCB	0	0	1	GCB	0.201	0.074	0.726	GCB	0.11	0.037	0.854	GCB	0.106	0.053	0.842	GCB
38	28	69.2485	female	1	5.16085	0	GCB	0.872	GCB	0	0	1	GCB	0.034	0.04	0.927	GCB	0	0	1	GCB	0.119	0	0.881	GCB	0	0	0.999	GCB	0.017	0.001	0.982	GCB	0	0	1	GCB	0.043	0.016	0.941	GCB	0.04	0.02	0.94	GCB	0.05	0.02	0.93	GCB
52	22	65.3443	male	1	4.4627	0	GCB	0.872	GCB	0	0	1	GCB	0.034	0.04	0.927	GCB	0	0	1	GCB	0.119	0	0.881	GCB	0.006	0.001	0.993	GCB	0.021	0.021	0.959	GCB	0	0	1	GCB	0.043	0.016	0.941	GCB	0.053	0	0.947	GCB	0.044	0	0.956	GCB
74	34	74.8493	male	1	6.19576	1	GCB	0.871	GCB	0	0	1	GCB	0.019	0	0.981	GCB	0	0	1	GCB	0.009	0.013	0.978	GCB	0.007	0	0.992	GCB	0.021	0.021	0.959	ABC	0	1	0	GCB	0.043	0.016	0.941	GCB	0.098	0.057	0.846	GCB	0.104	0.046	0.849	GCB
64	33	54.1863	female	1	2.13826	1	GCB	0.87	GCB	0	0	1	GCB	0.034	0.04	0.927	GCB	0	0	1	GCB	0.009	0.013	0.978	GCB	0.009	0.021	0.97	GCB	0.017	0.001	0.982	ABC	0	1	0	GCB	0.043	0.016	0.941	GCB	0.075	0.06	0.866	GCB	0.079	0.06	0.861	GCB
106	23	57.4401	male	1	4.54757	0	GCB	0.87	GCB	0	0	1	TypeIII	0.783	0.039	0.179	GCB	0	0	1	GCB	0	0.111	0.889	GCB	0.013	0.002	0.985	GCB	0.005	0	0.995	TypeIII	1	0	0	GCB	0.043	0.016	0.941	GCB	0.049	0.01	0.941	GCB	0.032	0.022	0.947	TypeIII
49	26	70.423	female	1	6.05886	1	GCB	0.864	GCB	0	0	1	GCB	0.034	0.04	0.927	GCB	0	0	1	GCB	0.119	0	0.881	GCB	0.04	0.002	0.958	TypeIII	0.715	0.088	0.196	GCB	0	0	1	GCB	0.043	0.016	0.941	GCB	0.04	0.01	0.95	GCB	0.033	0.005	0.962	GCB
58	40	81.3087	male	1	1.59617	1	GCB	0.864	GCB	0.001	0	0.999	GCB	0.034	0.04	0.927	GCB	0	0	1	GCB	0.009	0.013	0.978	GCB	0.017	0.002	0.982	GCB	0.021	0.021	0.959	GCB	0	0	1	GCB	0.201	0.074	0.726	GCB	0.156	0.013	0.831	GCB	0.137	0.012	0.851	GCB
6	30	80.4849	male	1	6.26694	0	GCB	0.863	GCB	0	0	1	GCB	0.034	0.04	0.927	GCB	0	0	1	GCB	0.009	0.013	0.978	GCB	0.05	0.023	0.927	GCB	0.021	0.021	0.959	GCB	0	0	1	GCB	0.043	0.016	0.941	GCB	0.088	0.03	0.882	GCB	0.069	0.02	0.911	GCB
40	41	86.6037	male	0	5.60712	1	GCB	0.863	GCB	0	0.015	0.985	GCB	0.034	0.04	0.927	GCB	0	0	1	GCB	0	0	1	GCB	0.002	0.033	0.964	GCB	0.041	0.013	0.947	GCB	0	0	1	GCB	0.084	0.177	0.739	GCB	0.017	0.16	0.823	GCB	0.019	0.145	0.836	GCB
19	42	59.2767	male	1	6.60096	0	GCB	0.86	GCB	0	0.008	0.992	GCB	0.034	0.04	0.927	GCB	0	0	1	GCB	0.009	0.013	0.978	GCB	0.008	0.047	0.945	GCB	0.042	0.001	0.957	GCB	0	0	1	ABC	0.086	0.803	0.112	GCB	0.01	0.14	0.85	GCB	0.005	0.171	0.824	GCB
57	39	75.2991	male	0	0.00821	1	GCB	0.858	GCB	0	0	1	GCB	0.034	0.04	0.927	GCB	0	0	1	GCB	0.009	0.013	0.978	GCB	0.001	0.004	0.995	GCB	0.033	0	0.967	GCB	0	0	1	GCB	0.043	0.016	0.941	GCB	0.02	0.187	0.793	GCB	0.025	0.16	0.814	GCB
168	43	81.3726	male	1	0.673511	1	GCB	0.858	GCB	0.008	0	0.992	GCB	0.019	0	0.981	GCB	0	0	1	GCB	0.009	0.013	0.978	GCB	0.02	0.001	0.978	GCB	0.017	0.001	0.982	TypeIII	1	0	0	GCB	0.043	0.016	0.941	GCB	0.133	0.056	0.811	GCB	0.136	0.054	0.81	GCB
109	35	90.4301	male	0	0.0383	1	GCB	0.856	GCB	0	0	1	GCB	0	0.039	0.961	GCB	0	0	1	GCB	0	0.111	0.889	GCB	0.002	0.017	0.982	GCB	0.021	0.021	0.959	GCB	0	0	1	GCB	0.084	0.177	0.739	GCB	0.017	0.095	0.888	GCB	0.021	0.083	0.896	GCB
100	32	73.5469	male	1	3.84394	1	GCB	0.854	GCB	0	0	1	GCB	0	0.039	0.961	GCB	0	0	1	GCB	0	0.111	0.889	GCB	0.002	0.012	0.987	GCB	0.021	0.021	0.959	GCB	0	0	1	GCB	0.084	0.177	0.739	GCB	0.041	0.084	0.875	GCB	0.033	0.082	0.886	GCB
129	38	77.4209	male	1	0.36961	1	GCB	0.853	GCB	0	0	1	GCB	0	0.039	0.961	GCB	0	0	1	GCB	0	0.111	0.889	GCB	0.005	0.028	0.967	GCB	0.021	0.021	0.959	GCB	0	0	1	GCB	0.084	0.177	0.739	GCB	0.012	0.098	0.889	GCB	0.031	0.086	0.883	GCB
102	37	68.4682	female	1	5.16085	1	GCB	0.852	GCB	0	0	1	GCB	0	0.039	0.961	GCB	0	0	1	GCB	0	0.111	0.889	GCB	0.032	0.023	0.945	GCB	0.021	0.021	0.959	GCB	0	0	1	GCB	0.043	0.016	0.941	GCB	0.06	0.034	0.906	GCB	0.069	0.032	0.898	GCB
79	44	69.0383	female	1	6.02327	0	GCB	0.85	GCB	0	0	1	GCB	0.019	0	0.981	GCB	0	0	1	GCB	0.009	0.013	0.978	GCB	0.021	0.032	0.947	GCB	0.017	0.001	0.982	TypeIII	1	0	0	GCB	0.043	0.016	0.941	GCB	0.103	0.086	0.81	GCB	0.117	0.115	0.768	GCB
37	46	80.7343	male	1	1.93019	1	GCB	0.841	GCB	0.001	0	0.999	GCB	0.034	0.04	0.927	GCB	0	0	1	GCB	0.009	0.013	0.978	GCB	0.022	0.015	0.963	GCB	0	0	1	GCB	0	0	1	GCB	0.084	0.177	0.739	GCB	0.115	0.13	0.755	GCB	0.14	0.108	0.752	GCB
167	45	81.2156	female	1	5.3525	1	GCB	0.824	GCB	0	0	1	GCB	0.034	0.04	0.927	GCB	0	0	1	GCB	0.119	0	0.881	GCB	0.146	0.003	0.851	TypeIII	0.955	0.026	0.019	GCB	0	0	1	GCB	0.043	0.016	0.941	GCB	0.101	0	0.899	GCB	0.135	0	0.865	GCB
68	51	90.5151	female	0	0.728268	1	GCB	0.814	GCB	0.02	0.414	0.566	GCB	0.034	0.04	0.927	GCB	0	0	1	GCB	0	0	1	GCB	0.017	0.096	0.887	GCB	0.004	0.002	0.994	GCB	0	0	1	GCB	0.084	0.177	0.739	GCB	0.04	0.258	0.702	GCB	0.056	0.287	0.657	GCB
32	47	71.0554	male	1	5.59343	0	GCB	0.813	GCB	0	0	1	GCB	0.019	0	0.981	GCB	0	0	1	GCB	0	0.111	0.889	GCB	0.083	0.042	0.875	GCB	0.002	0	0.998	GCB	0	0	1	GCB	0.084	0.177	0.739	GCB	0.149	0.027	0.823	GCB	0.142	0.06	0.797	GCB
119	49	68.9069	male	1	7.07461	0	GCB	0.81	GCB	0.001	0	0.999	GCB	0.034	0.04	0.927	GCB	0	0	1	GCB	0.009	0.013	0.978	GCB	0.015	0.024	0.96	GCB	0.242	0.022	0.736	ABC	0	1	0	GCB	0.084	0.177	0.739	GCB	0.13	0.233	0.637	GCB	0.135	0.216	0.648	GCB
92	48	74.2603	male	1	1.70842	1	GCB	0.806	GCB	0.003	0	0.997	GCB	0.019	0	0.981	GCB	0	0	1	GCB	0	0.111	0.889	GCB	0.048	0.063	0.889	GCB	0.052	0.001	0.947	GCB	0	0	1	GCB	0.084	0.177	0.739	GCB	0.162	0.06	0.778	GCB	0.152	0.074	0.774	GCB
88	52	82.4657	male	1	6.98152	0	GCB	0.801	TypeIII	0.507	0.001	0.492	GCB	0	0	1	GCB	0	0	1	GCB	0.009	0.013	0.978	GCB	0.061	0.075	0.863	GCB	0.214	0.005	0.782	TypeIII	1	0	0	GCB	0.201	0.074	0.726	GCB	0.184	0.119	0.698	GCB	0.178	0.134	0.689	GCB
14	50	68.1014	male	1	0.238193	1	GCB	0.794	TypeIII	0.789	0	0.211	GCB	0.019	0	0.981	GCB	0	0	1	GCB	0.119	0	0.881	GCB	0.069	0.022	0.91	TypeIII	0.846	0.025	0.129	TypeIII	1	0	0	GCB	0.043	0.016	0.941	GCB	0.211	0.07	0.72	GCB	0.227	0.056	0.716	GCB
115	57	65.4647	male	1	4.70363	1	GCB	0.79	GCB	0.01	0	0.99	GCB	0.034	0.04	0.927	GCB	0	0	1	GCB	0.009	0.013	0.978	GCB	0.089	0.009	0.902	GCB	0.242	0.022	0.736	ABC	0	1	0	GCB	0.201	0.074	0.726	GCB	0.235	0.153	0.612	GCB	0.265	0.166	0.569	GCB
160	58	74.0726	female	0	-0.0356	1	GCB	0.79	GCB	0.015	0	0.985	GCB	0.034	0.04	0.927	GCB	0	0	1	GCB	0.009	0.013	0.978	GCB	0.058	0.018	0.923	ABC	0.024	0.892	0.084	GCB	0	0	1	GCB	0.201	0.074	0.726	GCB	0.207	0.203	0.591	GCB	0.205	0.254	0.541	GCB
66	55	66.9178	female	1	6.43121	0	GCB	0.787	GCB	0.001	0	0.999	ABC	0	0.968	0.032	GCB	0	0	1	GCB	0	0.111	0.889	GCB	0.086	0.012	0.902	GCB	0.021	0.021	0.959	GCB	0	0	1	GCB	0.201	0.074	0.726	GCB	0.26	0.048	0.692	GCB	0.265	0.057	0.678	ABC
60	56	70.3288	male	1	0.290212	1	GCB	0.769	GCB	0.014	0.001	0.984	ABC	0	1	0	GCB	0	0	1	GCB	0	0.111	0.889	GCB	0.103	0.049	0.849	GCB	0.014	0.002	0.984	GCB	0	0	1	GCB	0.084	0.177	0.739	GCB	0.161	0.168	0.671	GCB	0.155	0.155	0.69	ABC
144	59	77.6	female	1	4.34223	1	GCB	0.761	TypeIII	0.592	0.014	0.395	GCB	0.034	0.04	0.927	GCB	0	0	1	GCB	0.009	0.013	0.978	GCB	0.114	0.015	0.871	GCB	0.021	0.021	0.959	GCB	0	0	1	GCB	0.201	0.074	0.726	GCB	0.362	0.108	0.53	GCB	0.348	0.127	0.525	GCB
22	53	51.4168	male	1	5.90007	0	GCB	0.758	GCB	0	0	1	GCB	0.034	0.04	0.927	GCB	0.016	0.148	0.836	GCB	0.009	0.013	0.978	GCB	0.01	0.425	0.565	GCB	0.373	0.102	0.525	ABC	0	1	0	ABC	0.086	0.803	0.112	GCB	0.019	0.16	0.821	GCB	0.026	0.154	0.821	GCB
81	54	67.2279	male	1	5.85353	0	GCB	0.746	GCB	0	0.008	0.992	GCB	0.034	0.04	0.927	ABC	0.033	0.967	0	GCB	0	0.111	0.889	GCB	0.037	0.285	0.679	GCB	0.202	0.009	0.789	GCB	0	0	1	GCB	0.084	0.177	0.739	GCB	0.03	0.22	0.75	GCB	0.027	0.22	0.753	GCB
21	60	69.3342	male	1	6.50513	0	GCB	0.729	GCB	0.002	0.001	0.997	ABC	0	0.968	0.032	GCB	0	0	1	GCB	0	0.111	0.889	GCB	0.043	0.087	0.871	GCB	0.03	0.005	0.965	GCB	0	0	1	ABC	0.086	0.803	0.112	GCB	0.161	0.349	0.49	GCB	0.185	0.342	0.472	ABC
17	61	48.7753	female	1	3.55099	0	GCB	0.715	GCB	0.447	0.045	0.508	GCB	0	0	1	ABC	0	1	0	GCB	0	0.111	0.889	GCB	0.05	0.067	0.883	GCB	0.279	0.188	0.532	GCB	0.119	0	0.881	GCB	0.084	0.177	0.739	GCB	0.209	0.369	0.422	GCB	0.219	0.343	0.439	GCB
16	66	63.7069	male	1	7.21424	0	GCB	0.693	ABC	0.357	0.393	0.249	TypeIII	0.973	0	0.027	GCB	0.351	0.172	0.477	GCB	0.009	0.013	0.978	GCB	0.086	0.197	0.717	GCB	0.242	0.022	0.736	GCB	0	0	1	GCB	0.084	0.177	0.739	GCB	0.239	0.349	0.412	GCB	0.255	0.361	0.384	TypeIII
123	63	73.9562	male	1	6.02053	0	GCB	0.676	GCB	0.22	0	0.78	GCB	0.034	0.04	0.927	GCB	0	0	1	GCB	0.009	0.013	0.978	GCB	0.052	0.28	0.669	GCB	0.386	0.187	0.427	ABC	0	1	0	ABC	0.086	0.803	0.112	ABC	0.136	0.471	0.393	ABC	0.133	0.462	0.405	GCB
131	72	42.2943	male	1	4.94456	0	GCB	0.657	GCB	0.069	0.272	0.659	GCB	0	0.039	0.961	ABC	0	1	0	GCB	0	0.111	0.889	GCB	0.093	0.188	0.719	GCB	0.257	0.014	0.729	GCB	0	0	1	GCB	0.084	0.177	0.739	TypeIII	0.367	0.281	0.352	TypeIII	0.349	0.314	0.336	GCB
112	67	68.4572	male	1	6.30527	0	GCB	0.644	GCB	0	0.462	0.538	GCB	0.034	0.04	0.927	ABC	0	1	0	GCB	0.009	0.013	0.978	ABC	0.015	0.52	0.465	ABC	0.033	0.944	0.022	ABC	0	1	0	ABC	0.086	0.803	0.112	ABC	0.052	0.48	0.468	ABC	0.068	0.467	0.465	GCB
149	62	67.6934	male	1	5.78508	0	GCB	0.603	GCB	0	0	1	GCB	0.034	0.04	0.927	GCB	0	0	1	TypeIII	0.993	0.007	0	GCB	0.072	0.005	0.923	GCB	0.021	0.021	0.959	GCB	0	0	1	GCB	0.043	0.016	0.941	GCB	0.08	0.097	0.823	GCB	0.114	0.091	0.796	TypeIII
77	76	40.7973	female	1	6.05339	0	GCB	0.6	GCB	0.003	0.003	0.994	GCB	0	0	1	TypeIII	0.854	0.046	0.099	GCB	0.119	0	0.881	GCB	0.187	0.308	0.505	GCB	0.045	0.012	0.943	ABC	0	1	0	TypeIII	0.855	0.145	0	ABC	0.268	0.385	0.347	GCB	0.273	0.353	0.375	GCB
35	64	63.2854	male	1	0.377823	1	GCB	0.578	GCB	0.063	0.012	0.925	TypeIII	0.973	0	0.027	TypeIII	0.915	0.048	0.038	GCB	0	0.111	0.889	GCB	0.306	0.143	0.551	GCB	0.06	0.051	0.889	TypeIII	1	0	0	GCB	0.084	0.177	0.739	GCB	0.298	0.164	0.537	GCB	0.374	0.155	0.471	TypeIII
161	70	56.5421	male	1	4.76934	0	GCB	0.571	ABC	0.012	0.987	0.001	ABC	0.058	0.923	0.019	GCB	0.003	0	0.997	GCB	0.009	0.013	0.978	GCB	0.024	0.374	0.601	ABC	0.285	0.541	0.174	GCB	0	0	1	ABC	0.086	0.803	0.112	ABC	0.136	0.49	0.373	ABC	0.178	0.493	0.329	ABC
3	65	29.2539	female	0	0.0301	1	GCB	0.553	TypeIII	0.958	0	0.042	TypeIII	0.973	0	0.027	TypeIII	0.51	0.374	0.116	GCB	0	0.111	0.889	GCB	0.347	0.081	0.572	TypeIII	0.899	0.018	0.083	TypeIII	1	0	0	GCB	0.084	0.177	0.739	TypeIII	0.428	0.154	0.418	TypeIII	0.445	0.122	0.432	TypeIII
73	68	75.9863	male	1	0.0986	1	GCB	0.545	GCB	0.127	0	0.873	TypeIII	0.783	0.039	0.179	TypeIII	0.97	0.014	0.015	GCB	0.119	0	0.881	TypeIII	0.526	0.029	0.444	TypeIII	0.715	0.088	0.196	TypeIII	1	0	0	TypeIII	0.855	0.145	0	GCB	0.333	0.145	0.522	GCB	0.333	0.128	0.538	TypeIII
29	78	69.789	male	1	6.66941	0	GCB	0.533	ABC	0	1	0	ABC	0.058	0.923	0.019	GCB	0.042	0.026	0.932	GCB	0	0	1	ABC	0.025	0.505	0.47	ABC	0.001	0.994	0.006	ABC	0	1	0	ABC	0.086	0.803	0.112	ABC	0.03	0.641	0.329	ABC	0.031	0.698	0.271	ABC
120	71	61.9302	male	1	5.08419	0	GCB	0.527	TypeIII	0.986	0	0.014	TypeIII	0.958	0	0.042	GCB	0.443	0.041	0.516	GCB	0.009	0.013	0.978	TypeIII	0.416	0.252	0.332	GCB	0.133	0.127	0.74	GCB	0	0	1	GCB	0.043	0.016	0.941	GCB	0.325	0.21	0.465	GCB	0.335	0.185	0.48	TypeIII
99	69	71.4904	female	1	5.82888	1	GCB	0.524	GCB	0.151	0	0.849	GCB	0.034	0.04	0.927	TypeIII	0.995	0	0.005	GCB	0.119	0	0.881	TypeIII	0.626	0.054	0.319	GCB	0.22	0.004	0.776	GCB	0	0	1	GCB	0.043	0.016	0.941	GCB	0.307	0.13	0.563	GCB	0.296	0.13	0.574	GCB
135	74	65.8919	male	1	5.84531	0	GCB	0.504	ABC	0	0.995	0.004	GCB	0.034	0.04	0.927	ABC	0	1	0	GCB	0	0	1	ABC	0.042	0.814	0.143	GCB	0.084	0.282	0.634	ABC	0	1	0	ABC	0.086	0.803	0.112	GCB	0.037	0.423	0.54	GCB	0.038	0.445	0.517	GCB
93	75	73.1014	female	1	1.87543	1	GCB	0.502	GCB	0.095	0	0.904	GCB	0.034	0.04	0.927	TypeIII	0.893	0.031	0.075	GCB	0.119	0	0.881	TypeIII	0.43	0.241	0.33	TypeIII	0.715	0.088	0.196	TypeIII	1	0	0	GCB	0.043	0.016	0.941	GCB	0.384	0.15	0.465	GCB	0.39	0.167	0.443	GCB
108	80	73.1964	female	0	0.0548	1	GCB	0.484	GCB	0	0.011	0.988	ABC	0	0.968	0.032	GCB	0	0	1	ABC	0.225	0.775	0	GCB	0.01	0.257	0.733	GCB	0.017	0.001	0.982	ABC	0	1	0	ABC	0.086	0.803	0.112	GCB	0.05	0.414	0.536	GCB	0.074	0.379	0.547	ABC
7	73	54.9041	male	1	0.646133	1	GCB	0.482	GCB	0.003	0	0.997	GCB	0.034	0.04	0.927	TypeIII	0.95	0.027	0.022	GCB	0.119	0	0.881	TypeIII	0.834	0.038	0.128	GCB	0.049	0.096	0.855	TypeIII	1	0	0	GCB	0.043	0.016	0.941	GCB	0.28	0.136	0.584	GCB	0.296	0.103	0.601	GCB
2	82	87.6082	female	0	0.106776	1	GCB	0.474	ABC	0.028	0.947	0.025	GCB	0	0	1	TypeIII	0.927	0.032	0.04	GCB	0	0.111	0.889	GCB	0.311	0.317	0.372	ABC	0.335	0.558	0.107	GCB	0	0	1	GCB	0.084	0.177	0.739	ABC	0.228	0.472	0.301	ABC	0.237	0.458	0.305	GCB
43	81	23.5975	male	1	5.02669	0	GCB	0.449	GCB	0.002	0	0.998	GCB	0	0	1	GCB	0.408	0.029	0.563	ABC	0.225	0.775	0	GCB	0.23	0.308	0.463	TypeIII	0.733	0.052	0.215	GCB	0	0	1	ABC	0.086	0.803	0.112	GCB	0.152	0.179	0.669	GCB	0.117	0.2	0.683	GCB
150	77	90.9507	female	1	1.91376	0	GCB	0.444	ABC	0.298	0.577	0.125	TypeIII	0.973	0	0.027	ABC	0	1	0	GCB	0.009	0.013	0.978	GCB	0.166	0.4	0.435	ABC	0.463	0.514	0.023	ABC	0	1	0	ABC	0.086	0.803	0.112	ABC	0.119	0.518	0.364	ABC	0.134	0.528	0.338	TypeIII
116	123	73.87	male	1	5.28953	0	GCB	0.44	TypeIII	0.61	0.259	0.131	ABC	0	0.968	0.032	GCB	0.299	0.174	0.528	ABC	0.096	0.904	0	GCB	0.123	0.187	0.691	ABC	0.024	0.892	0.084	ABC	0	1	0	GCB	0.201	0.074	0.726	GCB	0.27	0.329	0.401	GCB	0.27	0.341	0.388	ABC
33	113	73.0431	male	1	0.706365	1	GCB	0.415	TypeIII	0.46	0.133	0.407	ABC	0	0.968	0.032	GCB	0.315	0.045	0.64	TypeIII	0.881	0	0.119	GCB	0.253	0.228	0.519	GCB	0.214	0.005	0.782	ABC	0	1	0	GCB	0.201	0.074	0.726	TypeIII	0.366	0.28	0.355	GCB	0.327	0.32	0.354	ABC
94	124	71.0062	female	1	0.317591	1	GCB	0.397	GCB	0.49	0	0.51	GCB	0.019	0	0.981	GCB	0.102	0.039	0.859	ABC	0.225	0.775	0	ABC	0.09	0.472	0.439	GCB	0.003	0.023	0.974	GCB	0	0	1	ABC	0.086	0.803	0.112	GCB	0.24	0.277	0.483	GCB	0.204	0.272	0.524	GCB
97	79	75.948	male	1	0.295688	1	GCB	0.383	TypeIII	0.472	0.131	0.397	GCB	0	0.039	0.961	TypeIII	0.603	0.338	0.059	GCB	0	0.111	0.889	ABC	0.312	0.453	0.235	GCB	0.217	0.123	0.66	ABC	0	1	0	GCB	0.201	0.074	0.726	GCB	0.295	0.298	0.407	GCB	0.279	0.295	0.426	GCB
154	84	75.2252	female	1	4.81862	0	TypeIII	0.903	TypeIII	1	0	0	TypeIII	0.973	0	0.027	TypeIII	0.975	0.024	0.001	TypeIII	0.993	0.007	0	TypeIII	0.987	0.006	0.008	TypeIII	0.986	0.009	0.004	TypeIII	1	0	0	TypeIII	0.908	0	0.092	TypeIII	0.964	0.02	0.016	TypeIII	0.928	0.05	0.022	TypeIII
26	83	45.863	male	1	6.65298	0	TypeIII	0.9	TypeIII	1	0	0	TypeIII	0.973	0	0.027	TypeIII	0.996	0	0.004	TypeIII	0.993	0.007	0	TypeIII	0.989	0.003	0.008	TypeIII	0.986	0.009	0.004	TypeIII	1	0	0	TypeIII	0.908	0	0.092	TypeIII	0.95	0.04	0.01	TypeIII	0.965	0.025	0.01	TypeIII
13	85	73.0924	female	1	5.54141	0	TypeIII	0.897	TypeIII	1	0	0	TypeIII	0.973	0	0.027	TypeIII	0.956	0.043	0.001	TypeIII	0.993	0.007	0	TypeIII	0.964	0.027	0.009	TypeIII	0.955	0.026	0.019	TypeIII	1	0	0	TypeIII	0.908	0	0.092	TypeIII	0.965	0.029	0.006	TypeIII	0.947	0.03	0.023	TypeIII
159	86	55.7454	male	0	-0.0137	1	TypeIII	0.871	TypeIII	1	0	0	TypeIII	0.973	0	0.027	TypeIII	0.999	0.001	0	TypeIII	0.993	0.007	0	TypeIII	0.953	0.045	0.002	TypeIII	0.955	0.026	0.019	TypeIII	1	0	0	TypeIII	0.908	0	0.092	TypeIII	0.873	0.097	0.031	TypeIII	0.863	0.109	0.028	TypeIII
171	87	81.2184	female	1	4.89254	0	TypeIII	0.866	TypeIII	0.999	0	0.001	TypeIII	0.973	0	0.027	TypeIII	0.999	0	0.001	TypeIII	0.993	0.007	0	TypeIII	0.98	0	0.02	TypeIII	0.955	0.026	0.019	TypeIII	1	0	0	TypeIII	0.908	0	0.092	TypeIII	0.823	0.028	0.149	TypeIII	0.791	0.029	0.18	TypeIII
4	88	71.2772	male	1	6.27242	0	TypeIII	0.864	TypeIII	0.991	0	0.009	TypeIII	1	0	0	TypeIII	1	0	0	TypeIII	0.993	0.007	0	TypeIII	0.995	0.003	0.002	TypeIII	0.986	0.009	0.004	TypeIII	1	0	0	TypeIII	0.908	0	0.092	TypeIII	0.8	0.1	0.1	TypeIII	0.821	0.091	0.088	TypeIII
157	90	92.794	male	0	0.290212	1	TypeIII	0.834	TypeIII	0.997	0.001	0.002	TypeIII	0.982	0.018	0	TypeIII	0.839	0.143	0.018	TypeIII	0.993	0.007	0	TypeIII	0.99	0.008	0.002	TypeIII	0.912	0.033	0.055	ABC	0	1	0	TypeIII	0.908	0	0.092	TypeIII	0.685	0.12	0.195	TypeIII	0.708	0.138	0.154	TypeIII
170	89	76.1232	male	1	5.54415	0	TypeIII	0.833	TypeIII	0.999	0	0.001	TypeIII	0.973	0	0.027	TypeIII	0.916	0.076	0.007	TypeIII	1	0	0	TypeIII	0.851	0.143	0.006	TypeIII	0.977	0.022	0.001	TypeIII	1	0	0	ABC	0.086	0.803	0.112	TypeIII	0.813	0.171	0.016	TypeIII	0.77	0.169	0.061	TypeIII
78	91	26.6174	female	1	5.71663	0	TypeIII	0.822	TypeIII	0.999	0	0.001	TypeIII	0.982	0.018	0	TypeIII	0.948	0	0.051	TypeIII	0.993	0.007	0	TypeIII	0.921	0.028	0.051	TypeIII	0.903	0.056	0.042	TypeIII	1	0	0	TypeIII	0.908	0	0.092	TypeIII	0.707	0.07	0.223	TypeIII	0.725	0.092	0.183	TypeIII
12	92	80.6981	male	0	0.238193	1	TypeIII	0.819	TypeIII	0.996	0	0.004	TypeIII	0.982	0.018	0	TypeIII	0.998	0	0.002	TypeIII	0.993	0.007	0	TypeIII	0.882	0.004	0.114	TypeIII	0.955	0.026	0.019	TypeIII	1	0	0	TypeIII	0.908	0	0.092	TypeIII	0.736	0.091	0.174	TypeIII	0.714	0.122	0.164	TypeIII
62	93	40.8082	male	1	6.40383	0	TypeIII	0.812	TypeIII	0.992	0.001	0.007	TypeIII	0.982	0.018	0	TypeIII	1	0	0	TypeIII	0.993	0.007	0	TypeIII	0.987	0.012	0.001	TypeIII	0.955	0.026	0.019	ABC	0	1	0	TypeIII	0.908	0	0.092	TypeIII	0.604	0.248	0.148	TypeIII	0.585	0.285	0.13	TypeIII
51	94	60.9938	male	1	6.3217	0	TypeIII	0.789	TypeIII	0.943	0.046	0.01	TypeIII	0.982	0.018	0	TypeIII	1	0	0	TypeIII	0.993	0.007	0	TypeIII	0.946	0.018	0.036	TypeIII	0.986	0.009	0.004	ABC	0	1	0	TypeIII	0.855	0.145	0	TypeIII	0.551	0.309	0.14	TypeIII	0.564	0.314	0.122	TypeIII
95	95	47.8193	male	1	5.23751	0	TypeIII	0.778	TypeIII	0.943	0.057	0	TypeIII	0.982	0.018	0	TypeIII	0.998	0.002	0	TypeIII	0.993	0.007	0	TypeIII	0.832	0.167	0.001	TypeIII	0.977	0.022	0.001	TypeIII	1	0	0	TypeIII	0.855	0.145	0	TypeIII	0.62	0.307	0.073	TypeIII	0.596	0.308	0.096	TypeIII
76	96	77.8575	female	1	0.66256	1	TypeIII	0.749	TypeIII	0.998	0.001	0.001	TypeIII	0.973	0	0.027	TypeIII	0.864	0.134	0.001	TypeIII	0.881	0	0.119	TypeIII	0.832	0.132	0.036	TypeIII	0.755	0.198	0.047	TypeIII	1	0	0	TypeIII	0.875	0.125	0	TypeIII	0.617	0.196	0.188	TypeIII	0.655	0.187	0.158	TypeIII
91	97	63.3511	female	1	5.21561	0	TypeIII	0.724	TypeIII	0.942	0.058	0.001	TypeIII	0.973	0	0.027	TypeIII	0.987	0.011	0.002	TypeIII	0.805	0.065	0.13	TypeIII	0.81	0.164	0.026	ABC	0.277	0.723	0	TypeIII	1	0	0	ABC	0.086	0.803	0.112	TypeIII	0.615	0.302	0.084	TypeIII	0.635	0.285	0.08	TypeIII
124	99	33.3251	male	1	5.21287	0	TypeIII	0.686	TypeIII	0.98	0.001	0.019	TypeIII	0.958	0	0.042	TypeIII	0.951	0.004	0.044	TypeIII	0.805	0.065	0.13	TypeIII	0.743	0.085	0.172	TypeIII	0.678	0.237	0.086	ABC	0	1	0	GCB	0.043	0.016	0.941	TypeIII	0.53	0.194	0.277	TypeIII	0.533	0.18	0.287	TypeIII
96	98	84.0521	male	1	4.0794	1	TypeIII	0.664	TypeIII	0.985	0	0.015	GCB	0	0	1	TypeIII	0.974	0.019	0.008	TypeIII	0.667	0	0.333	TypeIII	0.678	0.138	0.184	ABC	0.438	0.562	0	TypeIII	1	0	0	TypeIII	0.875	0.125	0	TypeIII	0.645	0.139	0.216	TypeIII	0.635	0.16	0.205	GCB
50	102	70.1793	female	1	5.22929	0	TypeIII	0.623	TypeIII	0.908	0	0.092	TypeIII	0.973	0	0.027	TypeIII	0.975	0.001	0.024	TypeIII	0.805	0.065	0.13	TypeIII	0.554	0.046	0.4	TypeIII	0.629	0.001	0.37	TypeIII	1	0	0	GCB	0.084	0.177	0.739	TypeIII	0.467	0.121	0.412	GCB	0.429	0.13	0.441	TypeIII
158	106	75.7125	female	1	2.99521	1	TypeIII	0.603	TypeIII	0.84	0.121	0.039	TypeIII	0.973	0	0.027	ABC	0.194	0.748	0.058	TypeIII	1	0	0	ABC	0.314	0.439	0.247	GCB	0.242	0.022	0.736	GCB	0	0	1	ABC	0.086	0.803	0.112	TypeIII	0.432	0.394	0.174	ABC	0.415	0.43	0.156	TypeIII
145	105	81.0185	male	1	0.791239	1	TypeIII	0.564	TypeIII	0.968	0	0.032	TypeIII	0.973	0	0.027	GCB	0	0	1	TypeIII	0.993	0.007	0	GCB	0.029	0	0.971	TypeIII	0.6	0.267	0.133	TypeIII	1	0	0	TypeIII	0.908	0	0.092	TypeIII	0.569	0.147	0.284	TypeIII	0.617	0.14	0.243	TypeIII
27	103	64.5206	female	1	7.24162	0	TypeIII	0.558	TypeIII	0.999	0	0.001	TypeIII	0.973	0	0.027	TypeIII	0.865	0.124	0.011	GCB	0.009	0.013	0.978	TypeIII	0.861	0.102	0.037	ABC	0.194	0.7	0.106	TypeIII	1	0	0	ABC	0.086	0.803	0.112	TypeIII	0.695	0.206	0.099	TypeIII	0.676	0.185	0.139	TypeIII
89	101	55.6082	female	1	6.91581	0	TypeIII	0.557	TypeIII	0.704	0.272	0.023	GCB	0.034	0.04	0.927	TypeIII	0.994	0.003	0.003	TypeIII	0.993	0.007	0	TypeIII	0.513	0.468	0.018	TypeIII	0.57	0.258	0.172	ABC	0	1	0	TypeIII	0.855	0.145	0	ABC	0.39	0.411	0.199	ABC	0.394	0.452	0.154	GCB
63	104	51.0712	female	1	6.40383	0	TypeIII	0.539	TypeIII	0.99	0.009	0.001	TypeIII	0.973	0	0.027	TypeIII	0.639	0.299	0.061	GCB	0	0.111	0.889	TypeIII	0.809	0.077	0.114	GCB	0.243	0.014	0.742	TypeIII	1	0	0	GCB	0.084	0.177	0.739	TypeIII	0.68	0.094	0.225	TypeIII	0.682	0.113	0.205	TypeIII
166	100	73.4438	female	1	7.44148	0	TypeIII	0.539	GCB	0.383	0	0.617	TypeIII	0.973	0	0.027	TypeIII	0.595	0.003	0.402	TypeIII	0.805	0.065	0.13	GCB	0.444	0.067	0.489	TypeIII	0.783	0.163	0.054	TypeIII	1	0	0	GCB	0.201	0.074	0.726	TypeIII	0.573	0.022	0.405	TypeIII	0.564	0.023	0.413	TypeIII
23	107	75.4904	male	1	1.50856	1	TypeIII	0.538	TypeIII	0.997	0	0.003	TypeIII	0.958	0	0.042	TypeIII	0.612	0.363	0.025	GCB	0.119	0	0.881	TypeIII	0.723	0.206	0.071	TypeIII	0.715	0.088	0.196	TypeIII	1	0	0	GCB	0.043	0.016	0.941	TypeIII	0.643	0.056	0.301	TypeIII	0.647	0.042	0.311	TypeIII
164	110	77.1253	female	1	4.67899	0	TypeIII	0.538	TypeIII	0.986	0.001	0.013	TypeIII	1	0	0	ABC	0.208	0.788	0.003	TypeIII	0.667	0	0.333	ABC	0.195	0.796	0.008	GCB	0.242	0.022	0.736	ABC	0	1	0	GCB	0.201	0.074	0.726	TypeIII	0.623	0.237	0.14	TypeIII	0.608	0.253	0.14	TypeIII
8	116	62.5507	female	1	0.950034	1	TypeIII	0.532	GCB	0.103	0	0.897	TypeIII	0.958	0	0.042	GCB	0.107	0.013	0.879	TypeIII	0.805	0.065	0.13	GCB	0.308	0.27	0.422	TypeIII	0.678	0.237	0.086	GCB	0	0	1	GCB	0.043	0.016	0.941	GCB	0.347	0.081	0.572	GCB	0.341	0.075	0.584	TypeIII
133	111	45.0404	female	0	-0.00548	1	TypeIII	0.515	TypeIII	0.974	0	0.026	TypeIII	0.958	0	0.042	TypeIII	0.652	0.298	0.049	GCB	0.119	0	0.881	TypeIII	0.707	0.236	0.057	TypeIII	0.715	0.088	0.196	TypeIII	1	0	0	GCB	0	0	1	TypeIII	0.567	0.066	0.368	TypeIII	0.55	0.092	0.359	TypeIII
169	109	58.8912	female	1	4.62697	0	TypeIII	0.514	GCB	0.027	0	0.973	GCB	0.034	0.04	0.927	GCB	0	0	1	TypeIII	0.993	0.007	0	GCB	0.427	0	0.573	GCB	0.045	0.123	0.832	GCB	0	0	1	TypeIII	0.908	0	0.092	GCB	0.304	0.064	0.631	GCB	0.366	0.047	0.588	GCB
136	115	41.7878	female	1	4.87064	0	TypeIII	0.488	TypeIII	0.632	0	0.368	TypeIII	0.973	0	0.027	TypeIII	0.63	0.188	0.182	ABC	0.225	0.775	0	TypeIII	0.577	0.1	0.323	TypeIII	0.668	0.009	0.323	TypeIII	1	0	0	ABC	0.086	0.803	0.112	TypeIII	0.481	0.243	0.276	TypeIII	0.498	0.235	0.267	TypeIII
147	108	67.0055	male	0	0.0575	1	TypeIII	0.488	TypeIII	0.942	0	0.058	GCB	0	0	1	GCB	0.125	0	0.874	TypeIII	0.805	0.065	0.13	GCB	0.271	0.003	0.726	GCB	0.242	0.022	0.736	TypeIII	1	0	0	TypeIII	0.875	0.125	0	TypeIII	0.543	0.153	0.304	TypeIII	0.546	0.142	0.312	GCB
121	112	52.8569	male	1	5.07597	0	TypeIII	0.487	TypeIII	0.942	0.058	0	TypeIII	0.973	0	0.027	TypeIII	0.617	0.372	0.011	ABC	0.016	0.984	0	TypeIII	0.607	0.348	0.045	ABC	0.005	0.995	0	ABC	0	1	0	ABC	0.086	0.803	0.112	TypeIII	0.658	0.269	0.073	TypeIII	0.608	0.295	0.097	TypeIII
18	126	72.1699	male	0	0.0684	1	TypeIII	0.484	TypeIII	0.861	0.133	0.006	TypeIII	0.973	0	0.027	TypeIII	0.808	0.192	0.001	ABC	0.225	0.775	0	TypeIII	0.614	0.284	0.102	ABC	0.267	0.731	0.002	TypeIII	1	0	0	ABC	0.086	0.803	0.112	TypeIII	0.43	0.392	0.178	TypeIII	0.439	0.416	0.145	TypeIII
10	114	48.7693	male	1	5.99589	0	TypeIII	0.483	ABC	0.332	0.668	0.001	TypeIII	0.982	0.018	0	GCB	0.424	0	0.576	TypeIII	0.993	0.007	0	ABC	0.317	0.441	0.242	ABC	0.033	0.944	0.022	ABC	0	1	0	GCB	0	0	1	ABC	0.288	0.621	0.091	ABC	0.265	0.625	0.11	TypeIII
11	118	74.193	female	1	5.96578	0	TypeIII	0.459	TypeIII	0.815	0.009	0.177	GCB	0	0.039	0.961	TypeIII	0.839	0.147	0.015	ABC	0.225	0.775	0	TypeIII	0.459	0.293	0.249	GCB	0.367	0.019	0.614	GCB	0	0	1	ABC	0.086	0.803	0.112	TypeIII	0.484	0.228	0.288	TypeIII	0.528	0.213	0.259	GCB
128	119	73.588	male	1	0.342231	1	TypeIII	0.441	TypeIII	0.978	0.004	0.018	ABC	0	1	0	TypeIII	0.997	0.001	0.002	GCB	0.119	0	0.881	TypeIII	0.573	0.424	0.003	TypeIII	0.678	0.237	0.086	GCB	0	0	1	GCB	0	0	1	TypeIII	0.407	0.365	0.228	TypeIII	0.444	0.342	0.214	ABC
1	121	57.2813	female	1	6.28611	0	TypeIII	0.426	TypeIII	0.93	0.003	0.066	TypeIII	0.958	0	0.042	TypeIII	0.504	0.414	0.081	ABC	0.225	0.775	0	TypeIII	0.467	0.174	0.359	TypeIII	0.733	0.052	0.215	GCB	0	0	1	ABC	0.086	0.803	0.112	GCB	0.344	0.243	0.413	GCB	0.304	0.289	0.407	TypeIII
[truncated: 89 more columns]

## Sheet: GSE32918_GeneSelection
									TRAIN GSE10846 RCHOP
Meta Info							WrightTrained		LMT_J48_RF100_SMO
GEO_Number	OriginalOrder	Age	Sex	ActiveTreatment	Follow-up	Follow-up Status	ClassLMT_J48_RF100_SMO	MaxConf	ClassWright20	MaxWright	TypeIII	GCB	ABC	ClassWright10	MaxWright10	TypeIII	GCB	ABC	ClassWright5	MaxWright5	TypeIII	GCB	ABC	ClassDave185	Max185	TypeIII	GCB	ABC	ClassDave100	Max100	TypeIII	GCB	ABC	ClassDave50	Max50	TypeIII	GCB	ABC	ClassDave20	Max20	TypeIII	GCB	ABC	ClassDave10	Max10	TypeIII	GCB	ABC	ClassAll185
65	172	77.6438	male	1	0.342231	1	ABC	0.892	ABC	0.901	0.095	0.003	0.901	ABC	0.902	0.098	0	0.902	ABC	0.9	0.1	0	0.9	ABC	0.561	0.416	0.023	0.561	ABC	0.588	0.375	0.038	0.588	ABC	0.573	0.405	0.023	0.573	ABC	0.874	0.106	0.02	0.874	ABC	0.796	0.193	0.012	0.796	ABC
104	171	80.4244	male	1	0.388775	1	ABC	0.892	ABC	0.91	0.087	0.003	0.91	ABC	0.917	0.083	0	0.917	ABC	0.9	0.1	0	0.9	ABC	0.624	0.106	0.27	0.624	ABC	0.634	0.103	0.263	0.634	ABC	0.629	0.098	0.273	0.629	ABC	0.649	0.091	0.26	0.649	ABC	0.908	0.092	0	0.908	ABC
98	170	77.4237	male	0	0.104038	1	ABC	0.889	ABC	0.902	0.092	0.006	0.902	ABC	0.899	0.099	0.003	0.899	ABC	0.883	0.117	0	0.883	ABC	0.58	0.407	0.013	0.58	ABC	0.631	0.356	0.013	0.631	ABC	0.648	0.352	0	0.648	ABC	0.911	0.089	0	0.911	ABC	0.842	0.149	0.008	0.842	ABC
46	168	72.679	female	1	0.0821	1	ABC	0.862	ABC	0.897	0.094	0.008	0.897	ABC	0.909	0.088	0.003	0.909	ABC	0.903	0.097	0	0.903	ABC	0.828	0.029	0.143	0.828	ABC	0.847	0.121	0.033	0.847	ABC	0.859	0.111	0.03	0.859	ABC	0.8	0.04	0.16	0.8	GCB	0.541	0.062	0.541	0.397	ABC
114	167	77.9384	male	1	0.596851	1	ABC	0.853	ABC	0.902	0.092	0.006	0.902	ABC	0.91	0.09	0	0.91	ABC	0.901	0.099	0	0.901	ABC	0.896	0.094	0.01	0.896	ABC	0.889	0.111	0	0.889	ABC	0.907	0.088	0.005	0.907	ABC	0.916	0.084	0	0.916	ABC	0.912	0.087	0	0.912	ABC
85	169	91.737	female	0	0.0164	1	ABC	0.849	ABC	0.91	0.087	0.003	0.91	ABC	0.917	0.083	0	0.917	ABC	0.903	0.097	0	0.903	ABC	0.884	0.101	0.015	0.884	ABC	0.879	0.103	0.018	0.879	ABC	0.876	0.116	0.008	0.876	ABC	0.917	0.083	0	0.917	ABC	0.915	0.084	0	0.915	ABC
165	166	76.668	male	1	1.21287	1	ABC	0.844	ABC	0.907	0.087	0.006	0.907	ABC	0.917	0.083	0	0.917	ABC	0.901	0.099	0	0.901	ABC	0.877	0.096	0.028	0.877	ABC	0.879	0.103	0.018	0.879	ABC	0.899	0.096	0.005	0.899	ABC	0.899	0.096	0.005	0.899	ABC	0.906	0.088	0.005	0.906	ABC
47	165	65.7276	male	1	6.40383	0	ABC	0.821	ABC	0.637	0.351	0.013	0.637	ABC	0.553	0.314	0.133	0.553	ABC	0.55	0.429	0.021	0.55	ABC	0.535	0.403	0.063	0.535	ABC	0.549	0.146	0.305	0.549	ABC	0.571	0.147	0.283	0.571	ABC	0.703	0.224	0.073	0.703	ABC	0.683	0.271	0.046	0.683	ABC
36	164	57.5151	male	1	2.81451	0	ABC	0.808	ABC	0.633	0.362	0.005	0.633	ABC	0.562	0.421	0.016	0.562	ABC	0.889	0.111	0	0.889	ABC	0.581	0.399	0.02	0.581	ABC	0.595	0.395	0.01	0.595	ABC	0.563	0.425	0.013	0.563	ABC	0.884	0.11	0.005	0.884	ABC	0.846	0.144	0.01	0.846	ABC
134	159	34.9726	male	1	4.01095	1	ABC	0.805	TYPEIII	0.499	0.499	0.034	0.467	ABC	0.399	0.307	0.294	0.399	TYPEIII	0.616	0.616	0.023	0.36	GCB	0.56	0.168	0.56	0.272	GCB	0.697	0.151	0.697	0.152	TYPEIII	0.395	0.395	0.386	0.219	TYPEIII	0.642	0.642	0.17	0.188	TYPEIII	0.567	0.567	0.072	0.361	ABC
48	163	81.9712	female	0	5.17728	0	ABC	0.791	ABC	0.895	0.096	0.008	0.895	ABC	0.888	0.106	0.005	0.888	ABC	0.894	0.106	0	0.894	ABC	0.82	0.026	0.154	0.82	ABC	0.819	0.133	0.048	0.819	ABC	0.837	0.113	0.05	0.837	ABC	0.763	0.072	0.165	0.763	ABC	0.47	0.205	0.325	0.47	ABC
162	161	76.4244	female	1	5.63724	0	ABC	0.791	ABC	0.895	0.097	0.008	0.895	ABC	0.917	0.083	0	0.917	ABC	0.902	0.098	0	0.902	ABC	0.859	0.111	0.03	0.859	ABC	0.842	0.123	0.035	0.842	ABC	0.872	0.113	0.015	0.872	ABC	0.894	0.106	0	0.894	ABC	0.868	0.117	0.016	0.868	ABC
101	160	76.4107	male	1	4.37235	1	ABC	0.785	ABC	0.551	0.365	0.083	0.551	ABC	0.519	0.197	0.283	0.519	TYPEIII	0.58	0.58	0.028	0.392	ABC	0.611	0.366	0.023	0.611	ABC	0.607	0.116	0.278	0.607	ABC	0.601	0.384	0.015	0.601	ABC	0.573	0.423	0.003	0.573	ABC	0.537	0.451	0.012	0.537	ABC
140	153	77.8015	male	0	0.788501	1	ABC	0.78	ABC	0.783	0.159	0.058	0.783	ABC	0.812	0.143	0.045	0.812	ABC	0.714	0.24	0.046	0.714	ABC	0.767	0.142	0.092	0.767	ABC	0.813	0.134	0.053	0.813	ABC	0.647	0.256	0.097	0.647	ABC	0.792	0.182	0.026	0.792	ABC	0.741	0.227	0.032	0.741	ABC
20	149	64.6274	female	1	3.3128	0	ABC	0.776	ABC	0.813	0.177	0.01	0.813	ABC	0.776	0.205	0.019	0.776	ABC	0.83	0.168	0.003	0.83	ABC	0.49	0.452	0.058	0.49	TYPEIII	0.502	0.502	0.03	0.468	TYPEIII	0.494	0.494	0.02	0.486	ABC	0.833	0.154	0.012	0.833	ABC	0.793	0.176	0.031	0.793	ABC
80	162	94.0959	female	0	0.301164	1	ABC	0.773	ABC	0.871	0.115	0.014	0.871	ABC	0.823	0.154	0.022	0.823	ABC	0.812	0.155	0.033	0.812	ABC	0.835	0.117	0.048	0.835	ABC	0.854	0.121	0.025	0.854	ABC	0.886	0.109	0.005	0.886	ABC	0.908	0.089	0.003	0.908	ABC	0.878	0.118	0.003	0.878	ABC
59	154	63.126	male	0	0.0438056	1	ABC	0.771	ABC	0.803	0.181	0.016	0.803	ABC	0.838	0.152	0.009	0.838	ABC	0.825	0.145	0.03	0.825	ABC	0.585	0.308	0.107	0.585	ABC	0.715	0.225	0.059	0.715	ABC	0.746	0.187	0.067	0.746	ABC	0.627	0.316	0.056	0.627	TYPEIII	0.486	0.486	0.343	0.171	ABC
127	150	85.5332	female	0	2.5462	1	ABC	0.771	ABC	0.844	0.138	0.018	0.844	ABC	0.788	0.066	0.146	0.788	ABC	0.874	0.027	0.099	0.874	ABC	0.699	0.193	0.108	0.699	ABC	0.831	0.128	0.042	0.831	ABC	0.795	0.154	0.051	0.795	ABC	0.854	0.124	0.023	0.854	GCB	0.507	0.077	0.507	0.415	ABC
69	158	66.2849	male	1	4.97194	1	ABC	0.77	ABC	0.862	0.124	0.013	0.862	ABC	0.914	0.086	0	0.914	ABC	0.882	0.118	0	0.882	ABC	0.862	0.118	0.02	0.862	ABC	0.839	0.121	0.04	0.839	ABC	0.856	0.136	0.008	0.856	ABC	0.909	0.091	0	0.909	ABC	0.912	0.088	0	0.912	ABC
125	151	68.2327	male	1	5.01027	0	ABC	0.768	ABC	0.869	0.105	0.026	0.869	ABC	0.871	0.101	0.029	0.871	ABC	0.883	0.112	0.005	0.883	ABC	0.522	0.292	0.185	0.522	ABC	0.573	0.38	0.047	0.573	ABC	0.565	0.389	0.047	0.565	ABC	0.849	0.12	0.03	0.849	ABC	0.68	0.065	0.256	0.68	ABC
155	147	82.7918	male	1	0.654346	1	ABC	0.768	ABC	0.821	0.163	0.015	0.821	ABC	0.871	0.116	0.014	0.871	ABC	0.875	0.12	0.005	0.875	TYPEIII	0.459	0.459	0.093	0.448	ABC	0.484	0.461	0.055	0.484	TYPEIII	0.498	0.498	0.058	0.443	ABC	0.781	0.186	0.033	0.781	ABC	0.756	0.205	0.039	0.756	TYPEIII
118	148	84.6461	male	0	0.00821	1	ABC	0.766	ABC	0.813	0.159	0.028	0.813	ABC	0.809	0.16	0.03	0.809	ABC	0.83	0.17	0	0.83	TYPEIII	0.597	0.597	0.059	0.344	TYPEIII	0.725	0.725	0.05	0.225	TYPEIII	0.574	0.574	0.023	0.403	ABC	0.826	0.134	0.041	0.826	ABC	0.75	0.21	0.04	0.75	ABC
41	156	86.6283	male	0	0.00821	1	ABC	0.761	ABC	0.876	0.11	0.013	0.876	ABC	0.888	0.104	0.008	0.888	ABC	0.897	0.103	0	0.897	ABC	0.749	0.181	0.07	0.749	ABC	0.806	0.134	0.06	0.806	ABC	0.669	0.269	0.063	0.669	ABC	0.786	0.148	0.066	0.786	ABC	0.689	0.059	0.252	0.689	ABC
70	152	65.6318	male	1	0.717317	1	ABC	0.753	ABC	0.636	0.099	0.265	0.636	ABC	0.91	0.09	0	0.91	ABC	0.895	0.105	0	0.895	ABC	0.698	0.193	0.109	0.698	ABC	0.607	0.347	0.046	0.607	ABC	0.777	0.202	0.021	0.777	ABC	0.907	0.093	0	0.907	ABC	0.857	0.128	0.015	0.857	ABC
103	144	73.629	male	1	1.41273	1	ABC	0.752	ABC	0.863	0.119	0.018	0.863	ABC	0.914	0.086	0	0.914	ABC	0.896	0.104	0	0.896	ABC	0.79	0.14	0.071	0.79	ABC	0.796	0.144	0.06	0.796	ABC	0.752	0.199	0.049	0.752	ABC	0.882	0.108	0.01	0.882	ABC	0.908	0.091	0	0.908	ABC
113	157	66.3135	male	1	5.3744	0	ABC	0.752	ABC	0.906	0.091	0.003	0.906	ABC	0.914	0.086	0	0.914	ABC	0.897	0.103	0	0.897	ABC	0.876	0.107	0.018	0.876	ABC	0.894	0.098	0.008	0.894	ABC	0.904	0.091	0.005	0.904	ABC	0.916	0.084	0	0.916	ABC	0.906	0.093	0.001	0.906	ABC
45	155	68.4381	male	1	0.164271	1	ABC	0.749	ABC	0.857	0.111	0.031	0.857	ABC	0.807	0.143	0.049	0.807	ABC	0.87	0.124	0.006	0.87	ABC	0.549	0.419	0.032	0.549	ABC	0.6	0.38	0.02	0.6	TYPEIII	0.498	0.498	0.025	0.477	ABC	0.904	0.091	0.005	0.904	ABC	0.848	0.144	0.008	0.848	ABC
25	140	69.463	male	1	0.44627	1	ABC	0.732	ABC	0.835	0.155	0.01	0.835	ABC	0.819	0.175	0.006	0.819	ABC	0.891	0.109	0	0.891	ABC	0.598	0.377	0.025	0.598	ABC	0.602	0.378	0.02	0.602	ABC	0.607	0.388	0.005	0.607	ABC	0.898	0.099	0.003	0.898	ABC	0.851	0.148	0.001	0.851	ABC
163	139	79.7344	female	1	0.21629	1	ABC	0.727	ABC	0.869	0.11	0.021	0.869	ABC	0.914	0.086	0	0.914	ABC	0.894	0.106	0	0.894	ABC	0.783	0.144	0.073	0.783	ABC	0.802	0.131	0.068	0.802	ABC	0.799	0.146	0.055	0.799	ABC	0.792	0.15	0.058	0.792	ABC	0.823	0.157	0.02	0.823	ABC
86	142	59.1644	male	1	2.26146	1	ABC	0.724	ABC	0.533	0.174	0.293	0.533	ABC	0.508	0.317	0.176	0.508	ABC	0.457	0.209	0.334	0.457	ABC	0.429	0.191	0.38	0.429	GCB	0.421	0.245	0.421	0.334	ABC	0.461	0.243	0.296	0.461	ABC	0.534	0.154	0.312	0.534	ABC	0.466	0.186	0.348	0.466	ABC
105	145	71.4552	male	1	0.265572	1	ABC	0.724	ABC	0.875	0.109	0.017	0.875	ABC	0.9	0.097	0.003	0.9	ABC	0.898	0.1	0.003	0.898	ABC	0.58	0.406	0.014	0.58	ABC	0.598	0.379	0.023	0.598	ABC	0.591	0.391	0.018	0.591	ABC	0.896	0.097	0.008	0.896	ABC	0.862	0.116	0.023	0.862	ABC
148	135	71.3397	female	1	3.60301	0	ABC	0.712	ABC	0.828	0.156	0.016	0.828	ABC	0.829	0.147	0.025	0.829	ABC	0.877	0.118	0.005	0.877	ABC	0.623	0.189	0.187	0.623	ABC	0.745	0.145	0.109	0.745	ABC	0.725	0.124	0.151	0.725	ABC	0.473	0.329	0.198	0.473	GCB	0.4	0.236	0.4	0.364	GCB
87	143	71.1863	female	1	6.86379	0	ABC	0.708	ABC	0.842	0.147	0.011	0.842	ABC	0.823	0.174	0.003	0.823	ABC	0.827	0.172	0	0.827	ABC	0.818	0.144	0.038	0.818	ABC	0.839	0.116	0.045	0.839	ABC	0.864	0.126	0.01	0.864	ABC	0.897	0.098	0.005	0.897	ABC	0.875	0.124	0.001	0.875	ABC
54	136	72.0712	male	0	-0.00548	1	ABC	0.7	TYPEIII	0.515	0.515	0.097	0.388	TYPEIII	0.54	0.54	0.028	0.433	TYPEIII	0.517	0.517	0.005	0.478	TYPEIII	0.513	0.513	0.089	0.398	ABC	0.398	0.294	0.308	0.398	ABC	0.461	0.192	0.347	0.461	TYPEIII	0.542	0.542	0.087	0.372	TYPEIII	0.521	0.521	0.059	0.42	ABC
138	133	69.0521	male	1	0.52293	1	ABC	0.679	GCB	0.491	0.059	0.491	0.45	ABC	0.527	0.055	0.418	0.527	ABC	0.508	0.034	0.458	0.508	GCB	0.434	0.304	0.434	0.262	GCB	0.44	0.356	0.44	0.204	GCB	0.369	0.284	0.369	0.348	GCB	0.409	0.282	0.409	0.309	GCB	0.537	0.168	0.537	0.295	ABC
71	138	77.8959	female	1	3.87406	1	ABC	0.672	ABC	0.9	0.095	0.006	0.9	ABC	0.895	0.094	0.01	0.895	ABC	0.817	0.183	0	0.817	ABC	0.834	0.123	0.043	0.834	ABC	0.862	0.108	0.03	0.862	ABC	0.879	0.114	0.008	0.879	ABC	0.902	0.088	0.01	0.902	ABC	0.881	0.116	0.003	0.881	ABC
142	146	86.1218	male	0	4.20534	1	ABC	0.669	ABC	0.738	0.236	0.026	0.738	ABC	0.841	0.149	0.01	0.841	ABC	0.895	0.105	0	0.895	ABC	0.825	0.122	0.053	0.825	ABC	0.747	0.185	0.068	0.747	ABC	0.796	0.172	0.032	0.796	ABC	0.833	0.151	0.016	0.833	ABC	0.532	0.214	0.254	0.532	TYPEIII
151	141	74.6119	male	1	5.78508	0	ABC	0.629	ABC	0.594	0.379	0.028	0.594	ABC	0.473	0.364	0.164	0.473	ABC	0.595	0.397	0.008	0.595	ABC	0.499	0.412	0.088	0.499	ABC	0.504	0.16	0.335	0.504	ABC	0.546	0.385	0.069	0.546	ABC	0.497	0.084	0.419	0.497	GCB	0.615	0.089	0.615	0.297	ABC
126	134	66.1246	male	1	5.96304	0	ABC	0.625	ABC	0.81	0.139	0.05	0.81	ABC	0.778	0.184	0.038	0.778	ABC	0.893	0.107	0	0.893	GCB	0.529	0.38	0.529	0.092	GCB	0.541	0.394	0.541	0.065	GCB	0.47	0.43	0.47	0.1	ABC	0.425	0.199	0.376	0.425	GCB	0.77	0.154	0.77	0.076	GCB
82	137	60.3836	male	1	3.77823	1	ABC	0.594	ABC	0.833	0.138	0.029	0.833	ABC	0.859	0.127	0.014	0.859	ABC	0.882	0.118	0	0.882	ABC	0.759	0.193	0.048	0.759	ABC	0.663	0.304	0.033	0.663	ABC	0.65	0.317	0.033	0.65	ABC	0.882	0.111	0.008	0.882	ABC	0.834	0.114	0.052	0.834	ABC
122	132	64.4682	male	1	6.0397	0	ABC	0.58	ABC	0.873	0.105	0.021	0.873	ABC	0.873	0.101	0.026	0.873	ABC	0.857	0.05	0.093	0.857	ABC	0.869	0.106	0.025	0.869	ABC	0.864	0.111	0.025	0.864	ABC	0.899	0.093	0.008	0.899	ABC	0.906	0.091	0.003	0.906	ABC	0.891	0.103	0.005	0.891	ABC
156	125	66.0685	female	1	4.69815	1	ABC	0.564	ABC	0.53	0.328	0.142	0.53	ABC	0.376	0.368	0.256	0.376	ABC	0.595	0.12	0.285	0.595	ABC	0.679	0.237	0.084	0.679	ABC	0.788	0.134	0.078	0.788	ABC	0.808	0.143	0.049	0.808	ABC	0.763	0.167	0.07	0.763	ABC	0.713	0.23	0.056	0.713	ABC
5	131	96.3477	male	0	0.175223	1	ABC	0.558	ABC	0.888	0.108	0.004	0.888	ABC	0.815	0.167	0.018	0.815	ABC	0.861	0.139	0	0.861	ABC	0.516	0.433	0.051	0.516	ABC	0.598	0.369	0.033	0.598	ABC	0.535	0.411	0.054	0.535	ABC	0.856	0.117	0.027	0.856	ABC	0.733	0.165	0.101	0.733	ABC
110	130	76.5667	male	1	5.38262	0	ABC	0.538	ABC	0.506	0.267	0.227	0.506	ABC	0.396	0.296	0.308	0.396	TYPEIII	0.752	0.752	0.059	0.189	ABC	0.407	0.308	0.285	0.407	ABC	0.489	0.176	0.335	0.489	ABC	0.487	0.461	0.053	0.487	TYPEIII	0.532	0.532	0.076	0.393	TYPEIII	0.551	0.551	0.074	0.375	ABC
30	128	85.9753	female	0	3.1102	1	ABC	0.531	ABC	0.622	0.375	0.003	0.622	ABC	0.589	0.403	0.008	0.589	ABC	0.884	0.116	0	0.884	ABC	0.884	0.101	0.015	0.884	ABC	0.879	0.113	0.008	0.879	ABC	0.899	0.096	0.005	0.899	ABC	0.886	0.11	0.003	0.886	ABC	0.854	0.121	0.025	0.854	ABC
130	127	58.5407	male	1	4.96372	0	ABC	0.496	ABC	0.678	0.267	0.055	0.678	ABC	0.758	0.222	0.02	0.758	ABC	0.727	0.249	0.024	0.727	ABC	0.639	0.238	0.124	0.639	ABC	0.554	0.279	0.167	0.554	ABC	0.487	0.327	0.186	0.487	ABC	0.669	0.282	0.049	0.669	ABC	0.804	0.189	0.007	0.804	ABC
28	129	56.1973	female	1	1.28405	1	ABC	0.493	TYPEIII	0.514	0.514	0.062	0.424	ABC	0.59	0.39	0.02	0.59	ABC	0.719	0.274	0.008	0.719	TYPEIII	0.668	0.668	0.13	0.202	TYPEIII	0.731	0.731	0.09	0.18	TYPEIII	0.738	0.738	0.127	0.136	TYPEIII	0.681	0.681	0.085	0.234	TYPEIII	0.684	0.684	0.05	0.266	TYPEIII
117	117	78.037	female	0	-0.0383	1	ABC	0.433	ABC	0.456	0.182	0.362	0.456	TYPEIII	0.448	0.448	0.328	0.223	GCB	0.786	0.126	0.786	0.088	GCB	0.725	0.201	0.725	0.074	GCB	0.639	0.313	0.639	0.048	GCB	0.73	0.204	0.73	0.066	GCB	0.562	0.14	0.562	0.298	GCB	0.722	0.184	0.722	0.094	GCB
111	120	72.9172	male	1	3.03628	1	ABC	0.425	ABC	0.634	0.336	0.03	0.634	ABC	0.674	0.311	0.015	0.674	ABC	0.664	0.325	0.011	0.664	ABC	0.535	0.372	0.093	0.535	ABC	0.558	0.371	0.071	0.558	ABC	0.475	0.465	0.06	0.475	ABC	0.75	0.212	0.038	0.75	ABC	0.749	0.247	0.004	0.749	TYPEIII
31	122	83.7865	female	0	0.0411	1	ABC	0.406	ABC	0.514	0.469	0.017	0.514	ABC	0.708	0.272	0.02	0.708	ABC	0.876	0.124	0	0.876	TYPEIII	0.661	0.661	0.067	0.272	TYPEIII	0.763	0.763	0.04	0.197	TYPEIII	0.759	0.759	0.034	0.207	TYPEIII	0.534	0.534	0.02	0.446	ABC	0.537	0.434	0.029	0.537	ABC
15	2	71.9096	male	1	4.81588	0	GCB	0.911	GCB	0.917	0.083	0.917	0	GCB	0.917	0.083	0.917	0	GCB	0.916	0.084	0.916	0	GCB	0.899	0.096	0.899	0.005	GCB	0.849	0.148	0.849	0.003	GCB	0.91	0.09	0.91	0	GCB	0.913	0.087	0.913	0	GCB	0.912	0.088	0.912	0	GCB
42	1	71.8932	male	1	0.558522	1	GCB	0.911	GCB	0.914	0.084	0.914	0.003	GCB	0.914	0.084	0.914	0.003	GCB	0.916	0.084	0.916	0	GCB	0.852	0.126	0.852	0.023	GCB	0.877	0.113	0.877	0.01	GCB	0.863	0.115	0.863	0.023	GCB	0.844	0.141	0.844	0.016	GCB	0.908	0.092	0.908	0	GCB
9	6	58.7324	male	1	0.542095	1	GCB	0.908	GCB	0.904	0.086	0.904	0.01	GCB	0.904	0.086	0.904	0.01	GCB	0.902	0.086	0.902	0.013	GCB	0.894	0.091	0.894	0.015	GCB	0.902	0.091	0.902	0.008	GCB	0.909	0.088	0.909	0.003	GCB	0.909	0.086	0.909	0.005	GCB	0.886	0.112	0.886	0.003	GCB
75	5	73.3808	female	1	1.2512	1	GCB	0.908	GCB	0.873	0.11	0.873	0.018	GCB	0.857	0.133	0.857	0.01	GCB	0.855	0.137	0.855	0.008	GCB	0.897	0.093	0.897	0.01	GCB	0.902	0.093	0.902	0.005	GCB	0.905	0.09	0.905	0.005	GCB	0.908	0.092	0.908	0	GCB	0.909	0.091	0.909	0	GCB
137	3	76.4189	male	1	0.0821	1	GCB	0.908	GCB	0.878	0.112	0.878	0.01	GCB	0.871	0.099	0.871	0.03	GCB	0.866	0.104	0.866	0.03	GCB	0.889	0.098	0.889	0.013	GCB	0.899	0.093	0.899	0.008	GCB	0.905	0.09	0.905	0.005	GCB	0.91	0.09	0.91	0	GCB	0.91	0.089	0.91	0	GCB
39	8	68.2601	female	1	6.43942	0	GCB	0.906	GCB	0.904	0.093	0.904	0.003	GCB	0.911	0.086	0.911	0.003	GCB	0.908	0.092	0.908	0	GCB	0.89	0.097	0.89	0.013	GCB	0.894	0.096	0.894	0.01	GCB	0.868	0.117	0.868	0.015	GCB	0.897	0.1	0.897	0.003	GCB	0.91	0.088	0.91	0.003	GCB
67	4	71.0767	female	1	6.34908	0	GCB	0.906	GCB	0.915	0.085	0.915	0	GCB	0.915	0.085	0.915	0	GCB	0.911	0.089	0.911	0	GCB	0.86	0.125	0.86	0.015	GCB	0.851	0.136	0.851	0.013	GCB	0.869	0.121	0.869	0.01	GCB	0.877	0.113	0.877	0.01	GCB	0.859	0.133	0.859	0.008	GCB
44	7	67.603	male	1	4.67899	0	GCB	0.905	GCB	0.917	0.083	0.917	0	GCB	0.916	0.084	0.916	0	GCB	0.916	0.084	0.916	0	GCB	0.878	0.111	0.878	0.01	GCB	0.874	0.116	0.874	0.01	GCB	0.84	0.13	0.84	0.03	GCB	0.881	0.117	0.881	0.003	GCB	0.909	0.09	0.909	0.001	GCB
146	11	58.3901	male	1	4.8679	0	GCB	0.902	GCB	0.884	0.108	0.884	0.008	GCB	0.873	0.119	0.873	0.008	GCB	0.874	0.126	0.874	0	GCB	0.889	0.096	0.889	0.015	GCB	0.892	0.098	0.892	0.01	GCB	0.9	0.095	0.9	0.005	GCB	0.89	0.1	0.89	0.01	GCB	0.868	0.129	0.868	0.003	GCB
153	14	75.9452	male	1	4.82957	0	GCB	0.901	GCB	0.913	0.087	0.913	0	GCB	0.914	0.086	0.914	0	GCB	0.916	0.084	0.916	0	GCB	0.84	0.046	0.84	0.113	GCB	0.852	0.116	0.852	0.033	GCB	0.854	0.123	0.854	0.023	GCB	0.87	0.12	0.87	0.01	GCB	0.91	0.09	0.91	0	GCB
24	10	77.3397	male	1	2.70226	1	GCB	0.9	GCB	0.88	0.115	0.88	0.005	GCB	0.9	0.1	0.9	0	GCB	0.902	0.098	0.902	0	GCB	0.67	0.285	0.67	0.045	GCB	0.752	0.213	0.752	0.035	GCB	0.865	0.12	0.865	0.015	GCB	0.811	0.164	0.811	0.025	GCB	0.702	0.259	0.702	0.039	GCB
34	9	82.6995	male	0	0.120465	1	GCB	0.9	GCB	0.916	0.084	0.916	0	GCB	0.916	0.084	0.916	0	GCB	0.916	0.084	0.916	0	GCB	0.871	0.104	0.871	0.025	GCB	0.902	0.086	0.902	0.013	GCB	0.898	0.095	0.898	0.008	GCB	0.91	0.09	0.91	0	GCB	0.912	0.088	0.912	0	GCB
61	12	71.7534	female	1	6.41752	0	GCB	0.9	GCB	0.9	0.097	0.9	0.003	GCB	0.885	0.109	0.885	0.005	GCB	0.891	0.092	0.891	0.017	GCB	0.88	0.105	0.88	0.015	GCB	0.894	0.103	0.894	0.003	GCB	0.892	0.098	0.892	0.01	GCB	0.885	0.11	0.885	0.005	GCB	0.858	0.133	0.858	0.01	GCB
143	13	65.6932	female	1	0.692676	1	GCB	0.9	GCB	0.905	0.09	0.905	0.005	GCB	0.906	0.094	0.906	0	GCB	0.912	0.088	0.912	0	GCB	0.858	0.11	0.858	0.033	GCB	0.864	0.108	0.864	0.028	GCB	0.634	0.351	0.634	0.015	GCB	0.88	0.115	0.88	0.005	GCB	0.86	0.137	0.86	0.003	GCB
90	16	56.589	male	1	1.7577	1	GCB	0.898	GCB	0.737	0.141	0.737	0.123	GCB	0.518	0.126	0.518	0.356	ABC	0.544	0.048	0.408	0.544	GCB	0.61	0.347	0.61	0.043	GCB	0.643	0.307	0.643	0.05	GCB	0.627	0.323	0.627	0.05	GCB	0.63	0.318	0.63	0.053	GCB	0.814	0.128	0.814	0.058	GCB
152	18	59.9452	female	1	2.4449	1	GCB	0.896	GCB	0.655	0.09	0.655	0.256	GCB	0.898	0.097	0.898	0.005	GCB	0.879	0.119	0.879	0.003	GCB	0.854	0.101	0.854	0.045	GCB	0.889	0.096	0.889	0.015	GCB	0.869	0.101	0.869	0.03	GCB	0.899	0.094	0.899	0.008	GCB	0.65	0.222	0.65	0.128	GCB
107	17	62.037	female	1	0.629706	1	GCB	0.893	GCB	0.863	0.122	0.863	0.015	GCB	0.828	0.141	0.828	0.031	GCB	0.807	0.145	0.807	0.048	GCB	0.893	0.095	0.893	0.013	GCB	0.902	0.088	0.902	0.01	GCB	0.905	0.092	0.905	0.003	GCB	0.903	0.097	0.903	0	GCB	0.907	0.093	0.907	0	GCB
72	15	57.1699	female	1	6.07529	0	GCB	0.889	GCB	0.867	0.111	0.867	0.023	GCB	0.911	0.086	0.911	0.003	GCB	0.906	0.084	0.906	0.01	GCB	0.884	0.098	0.884	0.018	GCB	0.894	0.086	0.894	0.02	GCB	0.873	0.097	0.873	0.03	GCB	0.885	0.1	0.885	0.015	GCB	0.867	0.105	0.867	0.028	GCB
56	20	71.5428	male	1	6.00137	0	GCB	0.886	GCB	0.817	0.144	0.817	0.038	GCB	0.883	0.104	0.883	0.013	GCB	0.904	0.094	0.904	0.003	GCB	0.729	0.185	0.729	0.086	GCB	0.684	0.234	0.684	0.082	GCB	0.649	0.261	0.649	0.09	GCB	0.638	0.168	0.638	0.195	GCB	0.499	0.171	0.499	0.33	GCB
132	19	64.6384	female	1	6.86379	0	GCB	0.883	GCB	0.884	0.111	0.884	0.005	GCB	0.904	0.094	0.904	0.003	GCB	0.896	0.101	0.896	0.003	GCB	0.485	0.438	0.485	0.077	GCB	0.808	0.157	0.808	0.035	GCB	0.756	0.211	0.756	0.033	GCB	0.695	0.275	0.695	0.03	GCB	0.747	0.214	0.747	0.039	GCB
141	27	69.0349	male	1	2.19849	1	GCB	0.879	GCB	0.876	0.114	0.876	0.01	GCB	0.868	0.125	0.868	0.008	GCB	0.849	0.138	0.849	0.013	GCB	0.84	0.12	0.84	0.04	GCB	0.871	0.111	0.871	0.018	GCB	0.869	0.113	0.869	0.018	GCB	0.913	0.087	0.913	0	GCB	0.913	0.087	0.913	0	GCB
172	29	78.2149	male	0	0.0192	1	GCB	0.879	GCB	0.512	0.476	0.512	0.013	TYPEIII	0.514	0.514	0.484	0.003	TYPEIII	0.573	0.573	0.417	0.01	GCB	0.703	0.262	0.703	0.035	GCB	0.562	0.411	0.562	0.028	GCB	0.69	0.295	0.69	0.015	GCB	0.693	0.304	0.693	0.003	GCB	0.895	0.104	0.895	0	GCB
55	21	55.4606	male	1	4.76934	0	GCB	0.878	GCB	0.901	0.099	0.901	0	GCB	0.901	0.099	0.901	0	GCB	0.874	0.125	0.874	0	GCB	0.848	0.13	0.848	0.022	GCB	0.876	0.109	0.876	0.015	GCB	0.872	0.113	0.872	0.015	GCB	0.844	0.15	0.844	0.006	GCB	0.78	0.2	0.78	0.02	GCB
139	25	61.5578	female	1	5.80972	0	GCB	0.878	GCB	0.869	0.111	0.869	0.02	GCB	0.888	0.105	0.888	0.008	GCB	0.873	0.034	0.873	0.093	GCB	0.887	0.098	0.887	0.015	GCB	0.889	0.088	0.889	0.023	GCB	0.888	0.097	0.888	0.015	GCB	0.913	0.087	0.913	0	GCB	0.91	0.09	0.91	0	GCB
84	24	84.3562	male	0	0.0766598	1	GCB	0.875	GCB	0.878	0.115	0.878	0.008	GCB	0.9	0.1	0.9	0	GCB	0.896	0.014	0.896	0.09	GCB	0.696	0.216	0.696	0.089	GCB	0.68	0.268	0.68	0.052	GCB	0.774	0.172	0.774	0.054	GCB	0.8	0.188	0.8	0.012	GCB	0.831	0.152	0.831	0.017	GCB
53	31	55.5455	male	1	4.85147	0	GCB	0.873	GCB	0.898	0.1	0.898	0.003	GCB	0.861	0.129	0.861	0.01	GCB	0.848	0.14	0.848	0.013	GCB	0.887	0.106	0.887	0.008	GCB	0.884	0.108	0.884	0.008	GCB	0.898	0.1	0.898	0.003	GCB	0.91	0.09	0.91	0	GCB	0.902	0.098	0.902	0	GCB
83	36	71.0301	female	1	6.90212	0	GCB	0.873	GCB	0.903	0.097	0.903	0	GCB	0.908	0.092	0.908	0	GCB	0.905	0.095	0.905	0	GCB	0.706	0.264	0.706	0.03	GCB	0.862	0.113	0.862	0.025	GCB	0.795	0.182	0.795	0.023	GCB	0.846	0.153	0.846	0.001	GCB	0.758	0.216	0.758	0.026	GCB
38	28	69.2485	female	1	5.16085	0	GCB	0.872	GCB	0.887	0.103	0.887	0.01	GCB	0.853	0.127	0.853	0.02	GCB	0.828	0.142	0.828	0.03	GCB	0.559	0.285	0.559	0.156	GCB	0.824	0.136	0.824	0.04	GCB	0.569	0.383	0.569	0.048	GCB	0.863	0.122	0.863	0.015	GCB	0.91	0.087	0.91	0.003	GCB
52	22	65.3443	male	1	4.4627	0	GCB	0.872	GCB	0.898	0.097	0.898	0.005	GCB	0.904	0.089	0.904	0.008	GCB	0.912	0.085	0.912	0.003	GCB	0.892	0.101	0.892	0.008	GCB	0.914	0.086	0.914	0	GCB	0.91	0.09	0.91	0	GCB	0.913	0.087	0.913	0	GCB	0.909	0.091	0.909	0	GCB
74	34	74.8493	male	1	6.19576	1	GCB	0.871	GCB	0.887	0.108	0.887	0.005	GCB	0.912	0.088	0.912	0	GCB	0.913	0.085	0.913	0.003	GCB	0.878	0.104	0.878	0.018	GCB	0.899	0.098	0.899	0.003	GCB	0.878	0.12	0.878	0.003	GCB	0.894	0.104	0.894	0.003	GCB	0.896	0.102	0.896	0.002	GCB
64	33	54.1863	female	1	2.13826	1	GCB	0.87	GCB	0.741	0.237	0.741	0.022	GCB	0.721	0.232	0.721	0.048	GCB	0.813	0.154	0.813	0.033	GCB	0.602	0.365	0.602	0.033	GCB	0.824	0.161	0.824	0.015	GCB	0.627	0.352	0.627	0.022	GCB	0.907	0.093	0.907	0	GCB	0.887	0.106	0.887	0.008	GCB
106	23	57.4401	male	1	4.54757	0	GCB	0.87	GCB	0.889	0.104	0.889	0.008	GCB	0.891	0.104	0.891	0.005	GCB	0.905	0.095	0.905	0	GCB	0.772	0.161	0.772	0.067	GCB	0.846	0.119	0.846	0.035	GCB	0.837	0.133	0.837	0.03	GCB	0.849	0.138	0.849	0.013	GCB	0.807	0.164	0.807	0.029	GCB
49	26	70.423	female	1	6.05886	1	GCB	0.864	GCB	0.892	0.106	0.892	0.003	GCB	0.907	0.088	0.907	0.005	GCB	0.91	0.09	0.91	0	GCB	0.832	0.153	0.832	0.015	GCB	0.878	0.117	0.878	0.005	GCB	0.873	0.117	0.873	0.01	GCB	0.868	0.132	0.868	0	GCB	0.883	0.113	0.883	0.003	GCB
58	40	81.3087	male	1	1.59617	1	GCB	0.864	GCB	0.894	0.106	0.894	0	GCB	0.894	0.103	0.894	0.003	GCB	0.775	0.219	0.775	0.006	GCB	0.801	0.156	0.801	0.043	GCB	0.854	0.121	0.854	0.025	GCB	0.581	0.404	0.581	0.015	GCB	0.816	0.181	0.816	0.003	GCB	0.821	0.166	0.821	0.013	GCB
6	30	80.4849	male	1	6.26694	0	GCB	0.863	GCB	0.901	0.097	0.901	0.003	GCB	0.908	0.092	0.908	0	GCB	0.914	0.086	0.914	0	GCB	0.862	0.134	0.862	0.003	GCB	0.894	0.099	0.894	0.008	GCB	0.886	0.106	0.886	0.008	GCB	0.861	0.131	0.861	0.008	GCB	0.861	0.126	0.861	0.013	GCB
40	41	86.6037	male	0	5.60712	1	GCB	0.863	GCB	0.447	0.171	0.447	0.383	GCB	0.439	0.135	0.439	0.426	ABC	0.558	0.057	0.386	0.558	TYPEIII	0.528	0.528	0.355	0.117	TYPEIII	0.628	0.628	0.248	0.124	TYPEIII	0.668	0.668	0.214	0.119	GCB	0.399	0.374	0.399	0.228	GCB	0.622	0.209	0.622	0.17	ABC
19	42	59.2767	male	1	6.60096	0	GCB	0.86	GCB	0.769	0.083	0.769	0.147	GCB	0.806	0.179	0.806	0.016	GCB	0.833	0.157	0.833	0.01	GCB	0.529	0.335	0.529	0.135	GCB	0.427	0.344	0.427	0.23	TYPEIII	0.454	0.454	0.379	0.167	TYPEIII	0.496	0.496	0.151	0.353	TYPEIII	0.496	0.496	0.203	0.301	ABC
57	39	75.2991	male	0	0.00821	1	GCB	0.858	GCB	0.85	0.115	0.85	0.035	GCB	0.899	0.101	0.899	0	GCB	0.883	0.112	0.883	0.005	GCB	0.355	0.294	0.355	0.351	GCB	0.376	0.31	0.376	0.314	GCB	0.486	0.212	0.486	0.303	GCB	0.723	0.227	0.723	0.05	GCB	0.773	0.18	0.773	0.047	ABC
168	43	81.3726	male	1	0.673511	1	GCB	0.858	GCB	0.885	0.107	0.885	0.008	GCB	0.837	0.156	0.837	0.007	GCB	0.805	0.19	0.805	0.005	GCB	0.6	0.372	0.6	0.028	GCB	0.846	0.109	0.846	0.045	GCB	0.611	0.364	0.611	0.025	GCB	0.865	0.125	0.865	0.01	GCB	0.88	0.113	0.88	0.008	GCB
109	35	90.4301	male	0	0.0383	1	GCB	0.856	GCB	0.845	0.13	0.845	0.025	GCB	0.899	0.101	0.899	0	GCB	0.882	0.031	0.882	0.088	GCB	0.558	0.129	0.558	0.313	GCB	0.553	0.129	0.553	0.318	GCB	0.552	0.148	0.552	0.3	GCB	0.783	0.187	0.783	0.03	GCB	0.78	0.203	0.78	0.017	GCB
100	32	73.5469	male	1	3.84394	1	GCB	0.854	GCB	0.895	0.092	0.895	0.013	GCB	0.915	0.085	0.915	0	GCB	0.912	0.085	0.912	0.003	GCB	0.877	0.095	0.877	0.028	GCB	0.859	0.098	0.859	0.043	GCB	0.858	0.112	0.858	0.03	GCB	0.906	0.094	0.906	0	GCB	0.906	0.093	0.906	0.001	GCB
129	38	77.4209	male	1	0.36961	1	GCB	0.853	GCB	0.873	0.109	0.873	0.018	GCB	0.898	0.099	0.898	0.003	GCB	0.899	0.1	0.899	0.001	GCB	0.811	0.136	0.811	0.053	GCB	0.824	0.131	0.824	0.045	GCB	0.873	0.112	0.873	0.015	GCB	0.605	0.387	0.605	0.008	GCB	0.54	0.447	0.54	0.013	GCB
102	37	68.4682	female	1	5.16085	1	GCB	0.852	GCB	0.865	0.125	0.865	0.01	GCB	0.876	0.103	0.876	0.02	GCB	0.896	0.091	0.896	0.013	GCB	0.846	0.123	0.846	0.031	GCB	0.852	0.113	0.852	0.035	GCB	0.872	0.12	0.872	0.008	GCB	0.826	0.158	0.826	0.015	GCB	0.795	0.178	0.795	0.027	GCB
79	44	69.0383	female	1	6.02327	0	GCB	0.85	GCB	0.358	0.311	0.358	0.331	ABC	0.441	0.313	0.246	0.441	ABC	0.748	0.149	0.103	0.748	GCB	0.835	0.111	0.835	0.054	GCB	0.834	0.128	0.834	0.038	GCB	0.863	0.107	0.863	0.03	GCB	0.864	0.119	0.864	0.018	GCB	0.639	0.32	0.639	0.042	GCB
37	46	80.7343	male	1	1.93019	1	GCB	0.841	GCB	0.88	0.12	0.88	0	GCB	0.877	0.122	0.877	0	GCB	0.886	0.113	0.886	0.001	GCB	0.802	0.155	0.802	0.043	GCB	0.834	0.131	0.834	0.035	GCB	0.84	0.147	0.84	0.013	GCB	0.803	0.197	0.803	0	GCB	0.791	0.206	0.791	0.004	GCB
167	45	81.2156	female	1	5.3525	1	GCB	0.824	GCB	0.86	0.138	0.86	0.003	GCB	0.885	0.113	0.885	0.003	GCB	0.866	0.134	0.866	0	GCB	0.798	0.141	0.798	0.06	GCB	0.819	0.156	0.819	0.025	GCB	0.539	0.436	0.539	0.025	GCB	0.54	0.442	0.54	0.018	GCB	0.539	0.45	0.539	0.011	GCB
68	51	90.5151	female	0	0.728268	1	GCB	0.814	ABC	0.533	0.098	0.369	0.533	ABC	0.51	0.078	0.412	0.51	ABC	0.571	0.088	0.341	0.571	TYPEIII	0.573	0.573	0.168	0.259	TYPEIII	0.63	0.63	0.079	0.291	TYPEIII	0.702	0.702	0.16	0.138	ABC	0.714	0.195	0.091	0.714	GCB	0.604	0.134	0.604	0.262	GCB
32	47	71.0554	male	1	5.59343	0	GCB	0.813	TYPEIII	0.49	0.49	0.48	0.03	GCB	0.701	0.258	0.701	0.041	TYPEIII	0.502	0.502	0.356	0.142	GCB	0.803	0.147	0.803	0.049	GCB	0.769	0.201	0.769	0.03	GCB	0.837	0.136	0.837	0.028	GCB	0.841	0.147	0.841	0.011	GCB	0.779	0.19	0.779	0.03	GCB
119	49	68.9069	male	1	7.07461	0	GCB	0.81	GCB	0.7	0.268	0.7	0.032	GCB	0.507	0.201	0.507	0.292	GCB	0.423	0.173	0.423	0.405	TYPEIII	0.663	0.663	0.269	0.068	GCB	0.482	0.447	0.482	0.071	GCB	0.503	0.448	0.503	0.049	GCB	0.64	0.27	0.64	0.09	GCB	0.716	0.219	0.716	0.066	TYPEIII
92	48	74.2603	male	1	1.70842	1	GCB	0.806	GCB	0.876	0.118	0.876	0.006	GCB	0.884	0.104	0.884	0.012	GCB	0.906	0.091	0.906	0.003	GCB	0.716	0.223	0.716	0.062	GCB	0.845	0.117	0.845	0.038	GCB	0.814	0.15	0.814	0.036	GCB	0.786	0.187	0.786	0.027	GCB	0.787	0.191	0.787	0.022	GCB
88	52	82.4657	male	1	6.98152	0	GCB	0.801	TYPEIII	0.681	0.681	0.069	0.25	TYPEIII	0.703	0.703	0.073	0.224	ABC	0.867	0.13	0.003	0.867	TYPEIII	0.598	0.598	0.136	0.266	TYPEIII	0.536	0.536	0.202	0.262	TYPEIII	0.638	0.638	0.19	0.172	ABC	0.714	0.213	0.073	0.714	TYPEIII	0.451	0.451	0.292	0.256	ABC
14	50	68.1014	male	1	0.238193	1	GCB	0.794	GCB	0.791	0.175	0.791	0.034	GCB	0.788	0.156	0.788	0.056	GCB	0.815	0.153	0.815	0.033	GCB	0.87	0.117	0.87	0.013	GCB	0.897	0.091	0.897	0.013	GCB	0.88	0.11	0.88	0.01	GCB	0.897	0.103	0.897	0	GCB	0.9	0.098	0.9	0.002	GCB
115	57	65.4647	male	1	4.70363	1	GCB	0.79	TYPEIII	0.425	0.425	0.236	0.339	ABC	0.717	0.223	0.06	0.717	ABC	0.822	0.143	0.036	0.822	GCB	0.42	0.267	0.42	0.313	TYPEIII	0.389	0.389	0.312	0.3	TYPEIII	0.357	0.357	0.307	0.336	TYPEIII	0.501	0.501	0.377	0.122	GCB	0.637	0.308	0.637	0.056	GCB
160	58	74.0726	female	0	-0.0356	1	GCB	0.79	TYPEIII	0.389	0.389	0.307	0.304	ABC	0.652	0.187	0.161	0.652	ABC	0.655	0.139	0.207	0.655	GCB	0.444	0.223	0.444	0.333	GCB	0.551	0.139	0.551	0.309	GCB	0.447	0.15	0.447	0.403	GCB	0.462	0.238	0.462	0.299	TYPEIII	0.413	0.413	0.208	0.379	GCB
66	55	66.9178	female	1	6.43121	0	GCB	0.787	GCB	0.81	0.165	0.81	0.025	GCB	0.741	0.108	0.741	0.151	GCB	0.718	0.118	0.718	0.164	GCB	0.784	0.179	0.784	0.038	GCB	0.702	0.26	0.702	0.038	GCB	0.51	0.475	0.51	0.015	GCB	0.791	0.205	0.791	0.004	GCB	0.508	0.475	0.508	0.017	GCB
60	56	70.3288	male	1	0.290212	1	GCB	0.769	TYPEIII	0.499	0.499	0.477	0.024	GCB	0.701	0.276	0.701	0.023	TYPEIII	0.461	0.461	0.394	0.145	TYPEIII	0.424	0.424	0.412	0.165	TYPEIII	0.718	0.718	0.222	0.061	GCB	0.535	0.416	0.535	0.049	TYPEIII	0.57	0.57	0.393	0.037	TYPEIII	0.518	0.518	0.352	0.13	ABC
144	59	77.6	female	1	4.34223	1	GCB	0.761	GCB	0.853	0.139	0.853	0.008	GCB	0.847	0.147	0.847	0.006	GCB	0.891	0.109	0.891	0	GCB	0.713	0.218	0.713	0.069	GCB	0.789	0.141	0.789	0.07	GCB	0.689	0.28	0.689	0.03	TYPEIII	0.601	0.601	0.315	0.084	TYPEIII	0.63	0.63	0.115	0.255	GCB
22	53	51.4168	male	1	5.90007	0	GCB	0.758	GCB	0.801	0.155	0.801	0.045	GCB	0.6	0.112	0.6	0.288	GCB	0.589	0.024	0.589	0.387	GCB	0.832	0.123	0.832	0.045	GCB	0.832	0.136	0.832	0.033	GCB	0.843	0.142	0.843	0.015	GCB	0.802	0.182	0.802	0.016	GCB	0.781	0.187	0.781	0.031	GCB
81	54	67.2279	male	1	5.85353	0	GCB	0.746	TYPEIII	0.554	0.554	0.045	0.401	TYPEIII	0.693	0.693	0.068	0.239	ABC	0.697	0.268	0.035	0.697	TYPEIII	0.645	0.645	0.094	0.261	TYPEIII	0.709	0.709	0.079	0.212	TYPEIII	0.736	0.736	0.069	0.196	ABC	0.614	0.372	0.014	0.614	ABC	0.596	0.341	0.063	0.596	ABC
21	60	69.3342	male	1	6.50513	0	GCB	0.729	ABC	0.542	0.236	0.222	0.542	GCB	0.443	0.119	0.443	0.438	ABC	0.545	0.111	0.344	0.545	ABC	0.483	0.459	0.058	0.483	TYPEIII	0.496	0.496	0.02	0.484	TYPEIII	0.521	0.521	0.025	0.454	ABC	0.503	0.456	0.04	0.503	ABC	0.636	0.283	0.081	0.636	ABC
17	61	48.7753	female	1	3.55099	0	GCB	0.715	GCB	0.575	0.234	0.575	0.19	GCB	0.75	0.106	0.75	0.144	GCB	0.816	0.082	0.816	0.102	TYPEIII	0.503	0.503	0.088	0.409	ABC	0.524	0.16	0.316	0.524	TYPEIII	0.489	0.489	0.116	0.395	TYPEIII	0.512	0.512	0.024	0.464	TYPEIII	0.551	0.551	0.017	0.432	ABC
16	66	63.7069	male	1	7.21424	0	GCB	0.693	TYPEIII	0.587	0.587	0.084	0.33	TYPEIII	0.492	0.492	0.088	0.42	TYPEIII	0.474	0.474	0.092	0.434	TYPEIII	0.692	0.692	0.169	0.139	TYPEIII	0.745	0.745	0.08	0.175	TYPEIII	0.744	0.744	0.075	0.181	TYPEIII	0.606	0.606	0.072	0.322	TYPEIII	0.517	0.517	0.182	0.301	GCB
123	63	73.9562	male	1	6.02053	0	GCB	0.676	ABC	0.638	0.226	0.136	0.638	ABC	0.811	0.146	0.043	0.811	ABC	0.836	0.145	0.019	0.836	GCB	0.508	0.399	0.508	0.092	TYPEIII	0.515	0.515	0.394	0.091	GCB	0.504	0.398	0.504	0.098	ABC	0.473	0.193	0.334	0.473	GCB	0.623	0.286	0.623	0.091	GCB
131	72	42.2943	male	1	4.94456	0	GCB	0.657	TYPEIII	0.567	0.567	0.285	0.149	GCB	0.455	0.213	0.455	0.332	GCB	0.835	0.025	0.835	0.14	GCB	0.568	0.355	0.568	0.078	GCB	0.698	0.25	0.698	0.053	GCB	0.745	0.213	0.745	0.042	GCB	0.438	0.346	0.438	0.217	TYPEIII	0.501	0.501	0.239	0.26	GCB
112	67	68.4572	male	1	6.30527	0	GCB	0.644	ABC	0.738	0.025	0.237	0.738	ABC	0.708	0.184	0.109	0.708	ABC	0.833	0.056	0.111	0.833	ABC	0.767	0.034	0.199	0.767	ABC	0.739	0.035	0.226	0.739	ABC	0.821	0.033	0.146	0.821	ABC	0.665	0.062	0.273	0.665	GCB	0.708	0.063	0.708	0.229	TYPEIII
149	62	67.6934	male	1	5.78508	0	GCB	0.603	GCB	0.834	0.156	0.834	0.01	GCB	0.851	0.149	0.851	0	GCB	0.899	0.101	0.899	0	GCB	0.805	0.139	0.805	0.055	TYPEIII	0.576	0.576	0.371	0.053	GCB	0.806	0.162	0.806	0.033	GCB	0.507	0.478	0.507	0.016	GCB	0.7	0.28	0.7	0.02	TYPEIII
77	76	40.7973	female	1	6.05339	0	GCB	0.6	GCB	0.526	0.219	0.526	0.256	GCB	0.551	0.373	0.551	0.076	GCB	0.768	0.09	0.768	0.142	GCB	0.362	0.319	0.362	0.319	TYPEIII	0.35	0.35	0.342	0.309	ABC	0.376	0.282	0.342	0.376	ABC	0.484	0.198	0.318	0.484	GCB	0.549	0.056	0.549	0.395	ABC
35	64	63.2854	male	1	0.377823	1	GCB	0.578	ABC	0.622	0.327	0.051	0.622	ABC	0.638	0.34	0.022	0.638	ABC	0.827	0.17	0.002	0.827	ABC	0.758	0.178	0.064	0.758	ABC	0.745	0.205	0.05	0.745	ABC	0.721	0.252	0.026	0.721	ABC	0.84	0.139	0.021	0.84	ABC	0.884	0.112	0.004	0.884	ABC
161	70	56.5421	male	1	4.76934	0	GCB	0.571	GCB	0.494	0.275	0.494	0.231	GCB	0.66	0.19	0.66	0.15	GCB	0.598	0.365	0.598	0.037	GCB	0.503	0.329	0.503	0.168	GCB	0.758	0.063	0.758	0.179	TYPEIII	0.462	0.462	0.394	0.144	ABC	0.482	0.447	0.07	0.482	ABC	0.455	0.441	0.103	0.455	GCB
3	65	29.2539	female	0	0.0301	1	GCB	0.553	TYPEIII	0.468	0.468	0.234	0.299	TYPEIII	0.421	0.421	0.214	0.365	ABC	0.575	0.244	0.181	0.575	ABC	0.479	0.398	0.123	0.479	ABC	0.526	0.386	0.088	0.526	ABC	0.478	0.42	0.102	0.478	TYPEIII	0.5	0.5	0.157	0.343	ABC	0.502	0.458	0.039	0.502	GCB
73	68	75.9863	male	1	0.0986	1	GCB	0.545	GCB	0.793	0.166	0.793	0.04	GCB	0.851	0.129	0.851	0.02	GCB	0.83	0.155	0.83	0.015	GCB	0.737	0.149	0.737	0.115	GCB	0.804	0.144	0.804	0.053	GCB	0.755	0.185	0.755	0.06	GCB	0.729	0.197	0.729	0.074	GCB	0.723	0.06	0.723	0.216	ABC
29	78	69.789	male	1	6.66941	0	GCB	0.533	ABC	0.85	0.105	0.046	0.85	ABC	0.846	0.029	0.125	0.846	ABC	0.848	0.034	0.118	0.848	TYPEIII	0.451	0.451	0.114	0.435	ABC	0.579	0.386	0.035	0.579	TYPEIII	0.56	0.56	0.036	0.404	ABC	0.902	0.087	0.011	0.902	ABC	0.81	0.028	0.162	0.81	ABC
120	71	61.9302	male	1	5.08419	0	GCB	0.527	GCB	0.475	0.467	0.475	0.057	TYPEIII	0.762	0.762	0.117	0.121	TYPEIII	0.766	0.766	0.231	0.003	GCB	0.482	0.451	0.482	0.067	TYPEIII	0.479	0.479	0.467	0.053	TYPEIII	0.741	0.741	0.104	0.155	TYPEIII	0.699	0.699	0.245	0.056	TYPEIII	0.663	0.663	0.285	0.052	GCB
99	69	71.4904	female	1	5.82888	1	GCB	0.524	GCB	0.762	0.161	0.762	0.077	GCB	0.517	0.374	0.517	0.109	GCB	0.709	0.127	0.709	0.164	GCB	0.619	0.253	0.619	0.128	GCB	0.784	0.133	0.784	0.083	GCB	0.729	0.155	0.729	0.116	GCB	0.687	0.168	0.687	0.145	GCB	0.657	0.15	0.657	0.192	GCB
135	74	65.8919	male	1	5.84531	0	GCB	0.504	GCB	0.557	0.313	0.557	0.13	GCB	0.66	0.264	0.66	0.076	GCB	0.747	0.232	0.747	0.021	TYPEIII	0.397	0.397	0.358	0.245	TYPEIII	0.724	0.724	0.084	0.192	TYPEIII	0.441	0.441	0.367	0.193	ABC	0.444	0.215	0.341	0.444	GCB	0.427	0.206	0.427	0.367	ABC
93	75	73.1014	female	1	1.87543	1	GCB	0.502	GCB	0.678	0.245	0.678	0.076	GCB	0.752	0.233	0.752	0.015	GCB	0.839	0.07	0.839	0.091	ABC	0.5	0.305	0.195	0.5	ABC	0.529	0.055	0.416	0.529	ABC	0.546	0.389	0.065	0.546	ABC	0.587	0.127	0.286	0.587	ABC	0.537	0.089	0.374	0.537	ABC
108	80	73.1964	female	0	0.0548	1	GCB	0.484	ABC	0.519	0.057	0.424	0.519	ABC	0.795	0.068	0.137	0.795	ABC	0.877	0.122	0	0.877	GCB	0.589	0.307	0.589	0.103	TYPEIII	0.477	0.477	0.448	0.075	GCB	0.572	0.349	0.572	0.078	GCB	0.571	0.328	0.571	0.101	GCB	0.458	0.114	0.458	0.428	GCB
7	73	54.9041	male	1	0.646133	1	GCB	0.482	GCB	0.818	0.159	0.818	0.023	GCB	0.878	0.117	0.878	0.005	GCB	0.899	0.101	0.899	0	TYPEIII	0.438	0.438	0.198	0.364	GCB	0.704	0.137	0.704	0.159	TYPEIII	0.501	0.501	0.092	0.407	GCB	0.63	0.209	0.63	0.161	GCB	0.801	0.121	0.801	0.078	TYPEIII
2	82	87.6082	female	0	0.106776	1	GCB	0.474	ABC	0.57	0.419	0.01	0.57	TYPEIII	0.503	0.503	0.008	0.49	ABC	0.891	0.109	0	0.891	ABC	0.629	0.25	0.12	0.629	ABC	0.563	0.333	0.104	0.563	ABC	0.466	0.423	0.11	0.466	ABC	0.734	0.205	0.061	0.734	ABC	0.44	0.403	0.157	0.44	GCB
43	81	23.5975	male	1	5.02669	0	GCB	0.449	GCB	0.682	0.286	0.682	0.033	GCB	0.757	0.221	0.757	0.022	GCB	0.771	0.136	0.771	0.093	GCB	0.461	0.347	0.461	0.192	GCB	0.62	0.269	0.62	0.111	GCB	0.453	0.417	0.453	0.131	GCB	0.766	0.183	0.766	0.051	GCB	0.858	0.128	0.858	0.014	ABC
150	77	90.9507	female	1	1.91376	0	GCB	0.444	ABC	0.659	0.252	0.09	0.659	ABC	0.794	0.148	0.058	0.794	ABC	0.629	0.078	0.292	0.629	TYPEIII	0.523	0.523	0.185	0.291	TYPEIII	0.518	0.518	0.32	0.162	TYPEIII	0.689	0.689	0.228	0.083	ABC	0.484	0.45	0.067	0.484	ABC	0.665	0.226	0.109	0.665	GCB
116	123	73.87	male	1	5.28953	0	GCB	0.44	ABC	0.487	0.417	0.096	0.487	ABC	0.845	0.145	0.01	0.845	ABC	0.862	0.138	0	0.862	TYPEIII	0.615	0.615	0.3	0.086	TYPEIII	0.726	0.726	0.189	0.085	TYPEIII	0.663	0.663	0.244	0.093	TYPEIII	0.483	0.483	0.345	0.171	ABC	0.457	0.293	0.25	0.457	TYPEIII
33	113	73.0431	male	1	0.706365	1	GCB	0.415	TYPEIII	0.649	0.649	0.052	0.299	TYPEIII	0.587	0.587	0.019	0.395	ABC	0.858	0.142	0	0.858	TYPEIII	0.504	0.504	0.084	0.412	TYPEIII	0.553	0.553	0.06	0.388	TYPEIII	0.631	0.631	0.079	0.289	TYPEIII	0.513	0.513	0.073	0.414	ABC	0.543	0.34	0.117	0.543	ABC
94	124	71.0062	female	1	0.317591	1	GCB	0.397	GCB	0.644	0.242	0.644	0.115	GCB	0.688	0.203	0.688	0.109	GCB	0.596	0.147	0.596	0.257	TYPEIII	0.464	0.464	0.4	0.136	GCB	0.558	0.118	0.558	0.325	GCB	0.437	0.405	0.437	0.157	GCB	0.813	0.152	0.813	0.035	GCB	0.854	0.122	0.854	0.024	GCB
97	79	75.948	male	1	0.295688	1	GCB	0.383	ABC	0.492	0.441	0.067	0.492	TYPEIII	0.471	0.471	0.071	0.458	ABC	0.694	0.288	0.018	0.694	ABC	0.614	0.053	0.333	0.614	ABC	0.515	0.101	0.384	0.515	ABC	0.738	0.123	0.14	0.738	ABC	0.488	0.324	0.188	0.488	ABC	0.579	0.323	0.098	0.579	GCB
154	84	75.2252	female	1	4.81862	0	TypeIII	0.903	TYPEIII	0.695	0.695	0.194	0.111	TYPEIII	0.446	0.446	0.19	0.364	ABC	0.376	0.281	0.343	0.376	TYPEIII	0.722	0.722	0.166	0.112	TYPEIII	0.767	0.767	0.164	0.068	TYPEIII	0.777	0.777	0.16	0.063	TYPEIII	0.712	0.712	0.041	0.247	TYPEIII	0.673	0.673	0.006	0.322	TYPEIII
26	83	45.863	male	1	6.65298	0	TypeIII	0.9	TYPEIII	0.792	0.792	0.115	0.093	TYPEIII	0.568	0.568	0.02	0.411	TYPEIII	0.55	0.55	0.041	0.409	TYPEIII	0.791	0.791	0.065	0.144	TYPEIII	0.767	0.767	0.075	0.158	TYPEIII	0.809	0.809	0.136	0.055	TYPEIII	0.76	0.76	0.022	0.219	TYPEIII	0.706	0.706	0.023	0.271	TYPEIII
13	85	73.0924	female	1	5.54141	0	TypeIII	0.897	TYPEIII	0.729	0.729	0.044	0.227	ABC	0.679	0.307	0.014	0.679	ABC	0.649	0.328	0.024	0.649	TYPEIII	0.54	0.54	0.125	0.335	TYPEIII	0.512	0.512	0.128	0.361	TYPEIII	0.569	0.569	0.101	0.33	TYPEIII	0.674	0.674	0.206	0.12	TYPEIII	0.707	0.707	0.02	0.274	GCB
159	86	55.7454	male	0	-0.0137	1	TypeIII	0.871	TYPEIII	0.513	0.513	0.062	0.425	ABC	0.566	0.303	0.13	0.566	TYPEIII	0.646	0.646	0.037	0.317	TYPEIII	0.516	0.516	0.258	0.226	ABC	0.476	0.079	0.445	0.476	GCB	0.415	0.373	0.415	0.212	ABC	0.487	0.485	0.028	0.487	ABC	0.531	0.461	0.008	0.531	ABC
171	87	81.2184	female	1	4.89254	0	TypeIII	0.866	GCB	0.521	0.391	0.521	0.088	GCB	0.498	0.442	0.498	0.06	TYPEIII	0.479	0.479	0.478	0.043	GCB	0.534	0.383	0.534	0.083	GCB	0.554	0.399	0.554	0.048	GCB	0.53	0.417	0.53	0.053	TYPEIII	0.695	0.695	0.191	0.113	TYPEIII	0.689	0.689	0.105	0.205	TYPEIII
4	88	71.2772	male	1	6.27242	0	TypeIII	0.864	TYPEIII	0.501	0.501	0.403	0.096	TYPEIII	0.552	0.552	0.287	0.162	TYPEIII	0.793	0.793	0.066	0.141	TYPEIII	0.524	0.524	0.09	0.386	ABC	0.49	0.162	0.348	0.49	ABC	0.513	0.422	0.065	0.513	TYPEIII	0.663	0.663	0.058	0.278	TYPEIII	0.494	0.494	0.094	0.412	TYPEIII
157	90	92.794	male	0	0.290212	1	TypeIII	0.834	TYPEIII	0.515	0.515	0.04	0.445	ABC	0.539	0.318	0.143	0.539	ABC	0.563	0.421	0.016	0.563	ABC	0.546	0.395	0.059	0.546	ABC	0.531	0.426	0.043	0.531	ABC	0.549	0.406	0.045	0.549	ABC	0.547	0.153	0.3	0.547	ABC	0.487	0.155	0.358	0.487	ABC
170	89	76.1232	male	1	5.54415	0	TypeIII	0.833	TYPEIII	0.539	0.539	0.016	0.446	ABC	0.867	0.133	0	0.867	ABC	0.798	0.199	0.003	0.798	TYPEIII	0.552	0.552	0.169	0.278	TYPEIII	0.704	0.704	0.123	0.173	TYPEIII	0.595	0.595	0.149	0.256	TYPEIII	0.651	0.651	0.067	0.281	TYPEIII	0.654	0.654	0.015	0.331	TYPEIII
78	91	26.6174	female	1	5.71663	0	TypeIII	0.822	TYPEIII	0.474	0.474	0.178	0.348	TYPEIII	0.491	0.491	0.047	0.462	ABC	0.731	0.257	0.012	0.731	TYPEIII	0.588	0.588	0.246	0.167	TYPEIII	0.573	0.573	0.267	0.161	TYPEIII	0.74	0.74	0.18	0.08	ABC	0.6	0.3	0.1	0.6	TYPEIII	0.471	0.471	0.194	0.336	ABC
12	92	80.6981	male	0	0.238193	1	TypeIII	0.819	TYPEIII	0.519	0.519	0.438	0.043	TYPEIII	0.606	0.606	0.379	0.015	TYPEIII	0.569	0.569	0.43	0	TYPEIII	0.623	0.623	0.215	0.163	GCB	0.453	0.447	0.453	0.1	TYPEIII	0.716	0.716	0.101	0.184	TYPEIII	0.517	0.517	0.063	0.42	TYPEIII	0.492	0.492	0.06	0.448	TYPEIII
62	93	40.8082	male	1	6.40383	0	TypeIII	0.812	ABC	0.597	0.382	0.02	0.597	ABC	0.561	0.413	0.026	0.561	ABC	0.658	0.319	0.024	0.658	ABC	0.739	0.158	0.103	0.739	ABC	0.533	0.361	0.107	0.533	ABC	0.794	0.149	0.058	0.794	ABC	0.579	0.371	0.05	0.579	ABC	0.589	0.378	0.033	0.589	TYPEIII
51	94	60.9938	male	1	6.3217	0	TypeIII	0.789	TYPEIII	0.533	0.533	0.084	0.383	TYPEIII	0.74	0.74	0.191	0.069	GCB	0.58	0.387	0.58	0.032	TYPEIII	0.568	0.568	0.088	0.343	ABC	0.486	0.206	0.308	0.486	ABC	0.548	0.394	0.058	0.548	ABC	0.633	0.3	0.067	0.633	ABC	0.596	0.334	0.07	0.596	ABC
95	95	47.8193	male	1	5.23751	0	TypeIII	0.778	ABC	0.489	0.473	0.038	0.489	TYPEIII	0.564	0.564	0.007	0.429	TYPEIII	0.718	0.718	0.074	0.208	TYPEIII	0.535	0.535	0.107	0.358	TYPEIII	0.457	0.457	0.36	0.183	ABC	0.464	0.205	0.33	0.464	ABC	0.504	0.451	0.045	0.504	TYPEIII	0.518	0.518	0.021	0.462	ABC
76	96	77.8575	female	1	0.66256	1	TypeIII	0.749	ABC	0.623	0.343	0.033	0.623	ABC	0.735	0.242	0.023	0.735	ABC	0.679	0.311	0.009	0.679	ABC	0.566	0.332	0.102	0.566	TYPEIII	0.375	0.375	0.277	0.348	ABC	0.611	0.239	0.15	0.611	ABC	0.524	0.41	0.066	0.524	TYPEIII	0.523	0.523	0.02	0.457	ABC
91	97	63.3511	female	1	5.21561	0	TypeIII	0.724	ABC	0.775	0.204	0.021	0.775	ABC	0.865	0.129	0.005	0.865	ABC	0.861	0.129	0.01	0.861	ABC	0.593	0.285	0.122	0.593	ABC	0.472	0.453	0.075	0.472	ABC	0.588	0.336	0.076	0.588	ABC	0.83	0.155	0.015	0.83	ABC	0.817	0.168	0.015	0.817	TYPEIII
124	99	33.3251	male	1	5.21287	0	TypeIII	0.686	ABC	0.592	0.267	0.14	0.592	ABC	0.671	0.217	0.112	0.671	ABC	0.622	0.091	0.287	0.622	GCB	0.409	0.269	0.409	0.321	GCB	0.443	0.255	0.443	0.303	TYPEIII	0.353	0.353	0.346	0.301	ABC	0.374	0.367	0.259	0.374	GCB	0.472	0.171	0.472	0.357	GCB
96	98	84.0521	male	1	4.0794	1	TypeIII	0.664	TYPEIII	0.679	0.679	0.177	0.144	TYPEIII	0.666	0.666	0.062	0.272	TYPEIII	0.695	0.695	0.104	0.201	TYPEIII	0.667	0.667	0.217	0.116	TYPEIII	0.713	0.713	0.215	0.073	GCB	0.456	0.368	0.456	0.176	TYPEIII	0.473	0.473	0.068	0.459	ABC	0.524	0.384	0.092	0.524	GCB
50	102	70.1793	female	1	5.22929	0	TypeIII	0.623	TYPEIII	0.667	0.667	0.256	0.077	TYPEIII	0.605	0.605	0.354	0.041	GCB	0.644	0.334	0.644	0.022	TYPEIII	0.641	0.641	0.216	0.142	TYPEIII	0.461	0.461	0.446	0.093	TYPEIII	0.454	0.454	0.412	0.134	TYPEIII	0.493	0.493	0.045	0.462	TYPEIII	0.506	0.506	0.035	0.459	ABC
158	106	75.7125	female	1	2.99521	1	TypeIII	0.603	ABC	0.483	0.208	0.309	0.483	ABC	0.621	0.372	0.008	0.621	ABC	0.518	0.459	0.023	0.518	ABC	0.441	0.345	0.214	0.441	TYPEIII	0.454	0.454	0.185	0.36	ABC	0.598	0.263	0.14	0.598	ABC	0.798	0.164	0.038	0.798	ABC	0.837	0.153	0.009	0.837	TYPEIII
145	105	81.0185	male	1	0.791239	1	TypeIII	0.564	ABC	0.496	0.47	0.033	0.496	ABC	0.651	0.323	0.025	0.651	ABC	0.844	0.136	0.02	0.844	GCB	0.448	0.242	0.448	0.31	GCB	0.446	0.247	0.446	0.308	GCB	0.527	0.148	0.527	0.325	GCB	0.487	0.148	0.487	0.365	GCB	0.441	0.141	0.441	0.418	GCB
27	103	64.5206	female	1	7.24162	0	TypeIII	0.558	TYPEIII	0.762	0.762	0.206	0.032	TYPEIII	0.511	0.511	0.426	0.063	TYPEIII	0.78	0.78	0.194	0.026	TYPEIII	0.723	0.723	0.1	0.176	TYPEIII	0.732	0.732	0.085	0.183	TYPEIII	0.526	0.526	0.413	0.06	TYPEIII	0.754	0.754	0.067	0.179	TYPEIII	0.488	0.488	0.282	0.23	TYPEIII
89	101	55.6082	female	1	6.91581	0	TypeIII	0.557	ABC	0.852	0.137	0.011	0.852	ABC	0.788	0.204	0.008	0.788	ABC	0.881	0.114	0.005	0.881	ABC	0.82	0.133	0.048	0.82	ABC	0.786	0.171	0.043	0.786	ABC	0.841	0.129	0.03	0.841	ABC	0.808	0.154	0.038	0.808	ABC	0.721	0.248	0.03	0.721	ABC
63	104	51.0712	female	1	6.40383	0	TypeIII	0.539	TYPEIII	0.69	0.69	0.253	0.057	GCB	0.362	0.356	0.362	0.282	GCB	0.579	0.277	0.579	0.144	TYPEIII	0.731	0.731	0.173	0.096	TYPEIII	0.747	0.747	0.182	0.07	TYPEIII	0.522	0.522	0.43	0.048	TYPEIII	0.488	0.488	0.294	0.218	TYPEIII	0.484	0.484	0.262	0.254	TYPEIII
166	100	73.4438	female	1	7.44148	0	TypeIII	0.539	GCB	0.512	0.464	0.512	0.024	TYPEIII	0.732	0.732	0.122	0.147	TYPEIII	0.729	0.729	0.049	0.222	GCB	0.832	0.142	0.832	0.025	GCB	0.847	0.141	0.847	0.013	GCB	0.839	0.144	0.839	0.018	GCB	0.533	0.454	0.533	0.014	TYPEIII	0.585	0.585	0.361	0.054	GCB
23	107	75.4904	male	1	1.50856	1	TypeIII	0.538	GCB	0.543	0.406	0.543	0.051	GCB	0.426	0.422	0.426	0.152	TYPEIII	0.471	0.471	0.443	0.086	GCB	0.517	0.426	0.517	0.057	TYPEIII	0.742	0.742	0.2	0.058	TYPEIII	0.489	0.489	0.475	0.035	TYPEIII	0.685	0.685	0.252	0.063	TYPEIII	0.692	0.692	0.236	0.072	TYPEIII
164	110	77.1253	female	1	4.67899	0	TypeIII	0.538	ABC	0.54	0.229	0.232	0.54	ABC	0.575	0.157	0.268	0.575	TYPEIII	0.491	0.491	0.031	0.479	ABC	0.523	0.407	0.07	0.523	ABC	0.551	0.149	0.3	0.551	TYPEIII	0.521	0.521	0.064	0.415	ABC	0.567	0.405	0.028	0.567	ABC	0.553	0.428	0.018	0.553	ABC
8	116	62.5507	female	1	0.950034	1	TypeIII	0.532	GCB	0.688	0.273	0.688	0.038	GCB	0.514	0.466	0.514	0.02	GCB	0.851	0.149	0.851	0	GCB	0.851	0.117	0.851	0.033	GCB	0.869	0.096	0.869	0.035	GCB	0.847	0.122	0.847	0.03	GCB	0.823	0.157	0.823	0.02	GCB	0.861	0.125	0.861	0.014	GCB
133	111	45.0404	female	0	-0.00548	1	TypeIII	0.515	GCB	0.733	0.212	0.733	0.055	GCB	0.54	0.435	0.54	0.026	GCB	0.877	0.123	0.877	0	GCB	0.465	0.407	0.465	0.128	GCB	0.769	0.058	0.769	0.173	ABC	0.413	0.302	0.285	0.413	GCB	0.595	0.22	0.595	0.184	GCB	0.712	0.146	0.712	0.141	GCB
169	109	58.8912	female	1	4.62697	0	TypeIII	0.514	GCB	0.853	0.147	0.853	0	GCB	0.878	0.122	0.878	0	GCB	0.908	0.092	0.908	0	GCB	0.778	0.176	0.778	0.046	GCB	0.819	0.139	0.819	0.043	GCB	0.822	0.158	0.822	0.02	TYPEIII	0.513	0.513	0.459	0.028	GCB	0.574	0.401	0.574	0.025	GCB
136	115	41.7878	female	1	4.87064	0	TypeIII	0.488	GCB	0.37	0.329	0.37	0.302	GCB	0.467	0.101	0.467	0.433	GCB	0.474	0.194	0.474	0.332	TYPEIII	0.605	0.605	0.258	0.137	TYPEIII	0.594	0.594	0.307	0.1	TYPEIII	0.502	0.502	0.391	0.107	TYPEIII	0.403	0.403	0.268	0.329	ABC	0.437	0.411	0.152	0.437	ABC
147	108	67.0055	male	0	0.0575	1	TypeIII	0.488	GCB	0.442	0.25	0.442	0.308	ABC	0.399	0.31	0.291	0.399	TYPEIII	0.452	0.452	0.15	0.398	GCB	0.559	0.146	0.559	0.295	GCB	0.557	0.151	0.557	0.293	GCB	0.416	0.291	0.416	0.293	GCB	0.556	0.344	0.556	0.1	GCB	0.508	0.376	0.508	0.116	GCB
121	112	52.8569	male	1	5.07597	0	TypeIII	0.487	TYPEIII	0.506	0.506	0.321	0.173	TYPEIII	0.508	0.508	0.334	0.158	TYPEIII	0.746	0.746	0.192	0.063	ABC	0.524	0.403	0.073	0.524	ABC	0.567	0.136	0.298	0.567	ABC	0.543	0.425	0.033	0.543	TYPEIII	0.707	0.707	0.033	0.26	TYPEIII	0.568	0.568	0.027	0.405	ABC
18	126	72.1699	male	0	0.0684	1	TypeIII	0.484	TYPEIII	0.542	0.542	0.045	0.413	ABC	0.618	0.357	0.025	0.618	ABC	0.625	0.353	0.022	0.625	ABC	0.466	0.463	0.07	0.466	ABC	0.512	0.43	0.058	0.512	ABC	0.394	0.312	0.294	0.394	ABC	0.676	0.298	0.026	0.676	ABC	0.715	0.277	0.009	0.715	TYPEIII
10	114	48.7693	male	1	5.99589	0	TypeIII	0.483	ABC	0.537	0.248	0.215	0.537	TYPEIII	0.766	0.766	0.021	0.214	TYPEIII	0.792	0.792	0.038	0.17	ABC	0.545	0.385	0.07	0.545	ABC	0.549	0.166	0.285	0.549	TYPEIII	0.521	0.521	0.055	0.424	ABC	0.72	0.268	0.013	0.72	ABC	0.763	0.23	0.008	0.763	ABC
11	118	74.193	female	1	5.96578	0	TypeIII	0.459	TYPEIII	0.704	0.704	0.07	0.226	TYPEIII	0.812	0.812	0.028	0.16	ABC	0.682	0.297	0.02	0.682	TYPEIII	0.496	0.496	0.072	0.432	TYPEIII	0.45	0.45	0.294	0.255	TYPEIII	0.674	0.674	0.071	0.255	TYPEIII	0.472	0.472	0.065	0.462	ABC	0.625	0.348	0.027	0.625	ABC
128	119	73.588	male	1	0.342231	1	TypeIII	0.441	ABC	0.474	0.456	0.07	0.474	TYPEIII	0.478	0.478	0.112	0.41	TYPEIII	0.574	0.574	0.414	0.012	GCB	0.409	0.314	0.409	0.277	GCB	0.749	0.083	0.749	0.168	GCB	0.415	0.349	0.415	0.236	ABC	0.48	0.453	0.066	0.48	GCB	0.393	0.371	0.393	0.236	ABC
1	121	57.2813	female	1	6.28611	0	TypeIII	0.426	GCB	0.389	0.24	0.389	0.371	ABC	0.398	0.22	0.382	0.398	ABC	0.485	0.076	0.439	0.485	TYPEIII	0.593	0.593	0.193	0.214	TYPEIII	0.728	0.728	0.113	0.159	TYPEIII	0.714	0.714	0.125	0.161	ABC	0.382	0.329	0.289	0.382	ABC	0.425	0.213	0.362	0.425	TYPEIII
[truncated: 76 more columns]

[truncated: 4 more sheets: GSE34171, GSE4475, GSE4475_GeneSelection, Monti]
