# Supplementary material for: A Microarray Platform-Independent Classification Tool for Cell of Origin Class Allows Comparative Analysis of Gene Expression in Diffuse Large B-cell Lymphoma
Source: PLoS One. 2013 Feb 12;8(2):e55895. doi: 10.1371/journal.pone.0055895 (PMC3570548; doi:10.1371/journal.pone.0055895)
Supplement: Table S8 — Meta-profile signature enrichment analysis. The table is divided into two parts showing results for the ABC and GCB DLBCL meta-profiles separately. The first worksheet shows results for the ABC class (upABC_GCB), the second the results for the GCB class (ABC_upGCB). Shown are the enrichments observed for all signatures evaluated using the GeneSigDB, MSigDB and SignatureDB compendia as well as selected literature sources. For each signature the following are shown: the Gene Signature designation (Gene Signature), source of the signature (Source), number of genes overlapping between meta-profile and gene signature (Overlapping), number of genes in the signature (GeneSigSize), the average number of overlapping genes observed in 106 random samplings (randomAvg), the standard deviation of observed for 106 random samplings (randomAvg), the percentage of the gene signature that overlaps (%Overlap), whether a gene signature is enriched (Enriched) shown as 1 if probability of enrichment is <probability of depletion, the standard score for the observed overlap (ZScore), the probability of the overlap given the GeneSigSize (probablity), the Benjamini and Hochberg correction of probability scores (FDR), the enrichment or depletion of signatures and reciprocal signature pairs in ABC and GCB (Annotation), the genes contributing to overlap (EnrichedGenes), genes contributing to enrichment separated with ‘|’ (classifier genes excluded from analysis are located after ‘EXCLUDED_GENES:’ tag). For the “Annotation” column in each case the first symbol refers to the signature status in ABC (“+” = enriched (+ve Zscore), “−” = depleted (-ve Zscore), “*” = not significantly enriched or depleted) and the second symbol to the status in GCB. Where the signature is part of a signature pair (ie there are reciprocal signatures of up (_UP) and down (_DN) regulated genes for a given condition) these are separated by a “/”. These symbols can be used to search for signatures and signature pairs with [file pone.0055895.s009.xlsx]

## Sheet: upABC_GCB
Meta profile gene enrichment: shows the enrichemnt of 12,323 gene signatures against the meta profile ABC genes (present in >= 6 data-sets; 414 genes)
Headings:
Gene Signature: name of gene signature, see below for information on different gene signature sets
Source: origin of gene signature, either MSigDB (C1 -- C6; Molecular Signatures Database v3.1), DU_MQ (from Ming-Qing Du), GeneSigDB (Version 4), SHIPP (from http://www.ncbi.nlm.nih.gov/pubmed/15550490) or SignatureDB (from http://lymphochip.nih.gov/signaturedb/index.html)
	MSigDB: These signatures can be searched for at http://www.broadinstitute.org/gsea/msigdb/index.jsp
	GeneSigDB: the code in parentheses is the Pubmed publication code that the signature is from followed by the table/figure location. The gene signature can be searched for at http://compbio.dfci.harvard.edu/genesigdb/ by entering the text within the parentheses (e.g. 16166618-SuppTable4).
	SignatureDB: these signatures are from http://lymphochip.nih.gov/signaturedb/index.html. Signatures can be searched for at http://lymphochip.nih.gov/signaturedb/query.htm. The exception is MYD88_Ngo_etal which is from http://www.ncbi.nlm.nih.gov/pubmed/21179087 supplemental table 1.
Overlapping: number of up-regulated genes that overlap with the gene signature.
GeneSigSize: number of genes in gene signature (The 20 genes used for classification were removed from all gene signatures to avoid bias)
randomAvg: the average number of overlapping genes in 1,000,000 random samples
randomSD: the standard deviation for 1,000,000 random samples
%Overlap: the percentage of GeneSigSize that Overlapping genes represents
Enriched: 1 if probability of enrichment is < probability of depletion
Zscore: the standard score for the observed Overlapping; using the randomAvg and randomSD
probability: the probability of Overlapping given the GeneSigSize, drawSize (number of meta profile genes) and the genes present on all platforms used to generate the meta-profile; from hypergeometric distribution.
FDR: false discovery rate, Benjamini and Hochberg correction of probability scores
Annotation: + = enriched <0.05 prob, - = depleted <0.05 prob, *= > 0.05 prob. For individual gene signatures (i.e. not a pair of _UP/_DN sets), first symbol relates to upABC, the second to upGCB, thus +- is up-regulated in ABC and depleted in GCB. For paired samples the first two symbols relate to _UP file and second two to _DN file. Thus *+/+* means that the _UP signature is enriched only in GCB…
EnrichedGenes: Genes contributing to enrichment separated with '|'. Classifier genes excluded from analysis are located after 'EXCLUDED_GENES:' tag
Gene Signature	Source	Overlapping	GeneSigSize	randomAvg	randomSD	%Overlap	Enriched	Zscore	probability	FDR	Annotation (_UP/_DN)	EnrichedGenes
ABCgtGCB_U133AB	SignatureDB	167	270	4.52134	2.09775	61.8519	1	77.4537	5.44024e-238	5.60844e-235	+-	ADAM8|ADAMTS6|ADTRP|AFF3|AKIRIN1|ANKRD12|ARHGAP17|ARHGAP24|ARHGEF3|ARID3A|ARID3B|ARMC7|ASPHD2|BATF|BCL2|BCL2L10|BPGM|BSPRY|BTLA|C16ORF5|C1ORF186|CABLES1|CARD11|CCDC50|CCL22|CCR10|CCR7|CD44|CD47|CDKL1|CDYL|CFLAR|CHD1|CHDH|CHML|CHN2|CHST2|CHST7|CKAP4|CLECL1|CLINT1|CNTNAP1|CREB3L2|CSNK1E|CYB5R2|DCTD|DOCK10|DUSP5|EHD1|ELL2|ELOVL7|EML4|ERCC6L2|ERP29|FA2H|FAIM3|FAM108C1|FAM46C|FKBP11|FZD6|GAB1|GAB2|GPM…
ABC_gt_GCB_PMBL_MCL_BL_U133AB	SignatureDB	37	46	0.769021	0.869807	80.4348	1	41.654	3.46669e-58	2.6804e-55	+*	ADTRP|BATF|BCL2L10|BCL3|BSPRY|BTLA|C1ORF186|CCDC113|CCR10|CD44|CHN2|CSNK1E|CYB5R2|ELOVL7|FAM100B|FAM108C1|HCK|HIVEP1|HSP90B1|IL10|MOCOS|PIM2|PKN3|RAB7L1|RASGRF1|RNF183|SEC61A1|SLC38A5|STAMBPL1|STAT3|TBL1XR1|TCF4|TFRC|XK|ZBTB32|ZFAT|ZNF385C|EXCLUDED_GENES:|BMF|CCND2|ENTPD1|IRF4|PIM1
Human Lymphoma_Poulson05_48genes (15876249-Appendix1)	GeneSigDB	29	43	0.718493	0.839087	67.4419	1	33.7051	7.09364e-42	5.16209e-39	+*	ABCE1|ATP1B3|AVEN|BATF|CFLAR|CREB3L2|GTF3A|HCK|HSP90B1|IGHM|IL10RA|KIAA0226L|KIF13B|MARCH3|NT5DC2|PDCD11|PIM2|PLK3|PMM2|PNP|RNF138|SLA|SLC19A2|ST6GALNAC4|TCF4|TGIF1|TNFRSF13B|U2SURP|UCK2|EXCLUDED_GENES:|ENTPD1|FUT8|IRF4|PTPN1|SH3BP5
Human Lymphoma_Chin09_110genes (19377508-SuppTable2)	GeneSigDB	31	65	1.08756	1.03289	47.6923	1	28.9598	5.49842e-38	3.77894e-35	+*	ADTRP|ARHGAP17|ARHGAP24|BATF|BCL2|CCDC50|CCL22|CCR7|CD44|CSNK1E|CYB5R2|DCTD|EHHADH|IL10RA|IL2RA|KCNA3|LITAF|MARCKS|NFKBIZ|PAK1|PARVB|PDE4B|PHACTR2|PIM2|PTPN2|SP140|SPIB|STAT3|TBL1XR1|TCF4|TGFBR2|EXCLUDED_GENES:|BLNK|BMF|CCND2|ENTPD1|ETV6|FOXP1|FUT8|IL16|IRF4|PIM1|PTPN1|SH3BP5
Human Lymphoma_Lam08_1502genes (18160665-TableS5)	GeneSigDB	62	900	15.0508	3.77729	6.88889	1	12.4293	2.00641e-21	1.24107e-18	++	ACPP|AEN|BCL2|BCL3|BMPR2|BTLA|CCDC50|CCDC86|CCR7|CD37|CD44|CFLAR|CHD1|CHD2|CLECL1|CTR9|CYB5B|DCTD|DUSP5|EIF4G1|ELL2|FTSJ1|GCLC|GLO1|GNL3|GPR183|HCK|HSP90B1|IDH3A|IER5|IKZF1|IL10|IL2RA|KCNA3|LITAF|LYN|MANF|MAPKAPK2|MARCH3|MEX3C|MNDA|MTHFD1|NDUFV2|NIPA2|NOLC1|OXSR1|PDCD4|PHACTR1|PIAS2|PNP|PPIB|PRKCB|PTPN2|PTPRJ|RAC2|SLC38A2|STAT3|TCEB3|TESC|TFRC|UCK2|WDR11|EXCLUDED_GENES:|BLNK|ENTPD1|FUT8|IL16|IRF4…
Dendritic_cell_CD123pos_blood	SignatureDB	38	323	5.40435	2.29301	11.7647	1	14.2152	3.39368e-21	1.9992e-18	++	ARHGAP24|BSPRY|C9ORF91|CARD11|CCDC50|CDYL|CELF2|CREB3L2|DUSP5|EPHB1|ERCC6L2|ERN1|FAM129C|GAB1|GPX7|HIVEP1|KCTD5|KIAA0226L|KPTN|LEPREL1|LILRA4|LMAN1|MAPKAPK2|MIR155HG|SEC61B|SIDT1|SMC6|SOGA2|SPIB|ST6GALNAC4|STAMBPL1|SUSD1|TCF4|TOX2|UBE2E3|UGCG|VASH2|ZFAT|EXCLUDED_GENES:|BLNK
BASSO_CD40_SIGNALING_UP	MSigDB_C2	21	100	1.67191	1.28179	21	1	15.079	1.80301e-17	1.01387e-14	++/*+	ADAM8|BATF|BCL2|CCL22|CCR7|CD44|CFLAR|CHD1|EHD1|ELL2|FAIM3|GPR183|HSP90B1|LITAF|LYN|MAPKAPK2|PHACTR1|RAC2|TCEB3|TNFAIP8|VOPP1|EXCLUDED_GENES:|IRF4
Human Breast_Farmer05_3198genes_basal_apocrine_luminal (15897907-SuppTable2)	GeneSigDB	115	3102	51.8832	6.69174	3.70729	1	9.43206	4.28352e-17	2.30397e-14	++	ACSM3|AP3M2|ARHGEF3|ARNT2|BCL2|BCL3|BSPRY|C5ORF30|C9ORF91|CACNA1D|CCL18|CD44|CD47|CD69|CELF2|CFLAR|CHD1|CHN2|CHST2|COCH|COL9A3|CREB3L2|CSDA|CYB5R2|DUSP5|ECI1|EHHADH|ENOSF1|FAIM3|FZD6|GMFG|GPD2|GPM6A|GPR183|GPX7|HCK|HIST1H1C|HK2|HOOK1|IER5|IGHM|IGSF3|IL10RA|IL17RB|IQGAP2|IVNS1ABP|KIAA0226L|KIF13B|KIF14|LEPREL1|LEPROTL1|LYN|MAN1A1|MAP3K5|MARCH3|MARCKS|MCM2|MEX3C|MINA|MNDA|MOCOS|NETO2|NOLC1|NT5DC2|O…
PILON_KLF1_TARGETS_DN	MSigDB_C2	86	1964	32.8487	5.44862	4.37882	1	9.75499	9.01371e-17	4.64619e-14	*+/++	ABHD10|ADPGK|AKIRIN1|ANP32A|ANXA11|ARHGAP17|ARID3A|ATP1B3|ATXN7L1|BTLA|C5ORF30|CCDC50|CD44|CDYL|CELF2|CFLAR|CHDH|CKAP4|CNBP|COPB2|DCTD|DDI2|DOCK10|EBNA1BP2|GAB2|GABPB1|GNPTAB|GPD2|GRWD1|GYG1|IDH3A|IQGAP2|IRF2BP2|IVNS1ABP|LEPROTL1|LIMD1|LMAN1|LOC645638|LRRC33|MAP3K5|METTL8|MINA|MPEG1|MTDH|NABP1|NFKBID|NGLY1|NOC3L|NOLC1|PAK1|PAK2|PARL|PEBP1|PHF16|PLAC8|PLBD1|PLCL2|PNP|PRKCB|PTPLA|PTPN2|RAP1GDS1|RDX…
Human StemCell_Bhattacharya05_2471genes (16207381-Table1Sb)	GeneSigDB	90	2132	35.6567	5.6543	4.22139	1	9.61097	1.40762e-16	6.96546e-14	+*	ABCE1|ADAMTS6|ADRB2|AEN|ANKRD12|ANP32A|ARID3A|ATP1B3|B9D1|C16ORF88|CD200|CDYL|CHD1|CHML|CLINT1|COCH|COPB2|CTR9|CYB5B|DBN1|DCAF17|DLEU1|DNMT3A|EHHADH|EIF4G1|EML4|ERP29|FASTKD1|FECH|FNBP1L|FTSJ1|GCLC|GLO1|GNL3|HEATR6|HSP90B1|IGSF3|IQGAP2|IVNS1ABP|KIF14|LAG3|LMAN1|MCM2|MOCOS|MTHFD1|NDUFV2|NETO2|NGLY1|NOLC1|OXSR1|PAK1|PARP4|PDCD11|PHF16|PIAS2|PIM2|PION|PLBD1|POLR1C|POLR3G|PTPLA|PTPN2|RAVER2|RNF138|RR…
HOLLMANN_APOPTOSIS_VIA_CD40_DN	MSigDB_C2	30	266	4.45248	2.0813	11.2782	1	12.2748	1.8607e-16	8.85335e-14	*+/+*	ABHD10|AP3B1|CSDA|CYB5R2|DNMT3A|GAB2|GMFG|HIST1H1C|HIST1H2AC|KIAA0226L|KLHL21|LITAF|MSRB1|NEK3|NOSIP|OXSR1|PDE4B|PDLIM1|RNASE6|RNF138|SIDT1|SP140|ST3GAL5|SUB1|TARS|TCF4|THYN1|TLE1|TOR1AIP1|XK
Mouse StemCell_Chambers07_1667genes (17676974-TableS1)	GeneSigDB	65	1239	20.7242	4.39917	5.24617	1	10.0646	2.17712e-16	9.97525e-14	++	ABCE1|AEN|AKIRIN1|ATP1B3|ATXN7L1|BCL3|CCDC50|CD47|CDYL|CFLAR|CHD1|CHN2|COPB2|CSDA|CSNK1E|DNMT3A|ELL2|ELOVL7|FAM46C|FECH|GABPB1|GNPTAB|HK2|HSP90B1|IL10|IPO4|IVNS1ABP|KCTD5|KLHL21|LEPROTL1|LITAF|LMAN1|LRRC33|MPEG1|NABP1|NFKBIZ|NOLC1|PAK1|PDE4B|PECR|PIM2|PLBD1|PTPN2|RAP1GDS1|RDX|S1PR1|SLC38A2|SMARCA2|SMC6|SMU1|SRPRB|ST6GALNAC4|STAM|TARS|TBL1XR1|TGIF1|TM2D3|TNFAIP8|TOMM70A|UBE2W|UGCG|ULK2|VOPP1|XK|ZM…
ABC_gt_GCB_Affy	SignatureDB	10	13	0.217754	0.462825	76.9231	1	21.1359	4.20559e-16	1.85812e-13	+*	BATF|BCL2|CSNK1E|MARCKS|PIM2|PRKCB|SLA|SP140|SPIB|TCF4|EXCLUDED_GENES:|CCND2|ENTPD1|FUT8|IL16|IRF4|PIM1|PTPN1
Mouse InnerEar_Sajan08_5223genes (17660535-TableS4a)	GeneSigDB	144	4540	75.9268	7.81045	3.17181	1	8.71565	8.14404e-16	3.47414e-13	++	ABCE1|ADPRH|AEN|AKIRIN1|ALG3|ANP32A|AP3M2|ARID3A|ARID3B|ATP1B3|BCL2|BPGM|BSPRY|CABLES1|CACNA1D|CCDC86|CD200|CD47|CELF2|CHD1|CKAP4|CLINT1|CNBP|COL9A3|CREB3L2|CSDA|CTR9|CYB5B|DBN1|DNMT3A|EBNA1BP2|ECI1|EHD1|EHHADH|EIF4G1|ELOVL7|EPS15L1|ERN1|FASTKD1|FGD2|FNDC3A|FTSJ1|FZD6|GAB1|GABPB1|GCDH|GCLC|GLO1|GNL3|GPM6A|GPX7|GRWD1|HIST1H1C|HIVEP1|HK2|HSP90B1|IDH3A|IER5|IL10|IPO4|IVNS1ABP|KLHL21|LEPROTL1|LITAF|L…
Mouse Lung_not_cancer_Woodruff05_2371genes (16166618-SuppTable4)	GeneSigDB	71	1513	25.3033	4.83612	4.69266	1	9.44904	2.34398e-15	9.66579e-13	++	ADAM8|ARNT2|ATP13A3|ATXN7L1|BCL2|BTLA|CACNA1D|CARD11|CCDC50|CCDC86|CCL22|CCR7|CD37|CD44|CD47|CDYL|CKAP4|CLINT1|CSDA|CSNK1E|DHRS13|DNMT3A|DOCK10|EHHADH|EML4|FAM46C|FGD2|FNBP1L|GAB2|GPR183|HCK|HIVEP1|HK2|HOOK1|IGHM|IKZF1|IQGAP2|ITGAE|LBH|LPIN2|LRRC33|MAP3K5|MARCKS|MCOLN2|MEX3C|MNDA|OXSR1|P2RY10|PAK1|PARP4|PCYT1A|PDLIM1|PION|PLAC8|PLBD1|PLEKHG1|PLK3|PRKCB|RAB7L1|S1PR1|SCAMP2|SIK3|SLAMF7|SLC19A2|SMC6…
OXYPHOS	SHIPP	38	484	8.09502	2.79337	7.85124	1	10.7057	3.06491e-15	1.2231e-12	++	BATF|BCL2|C19ORF10|C7ORF23|CD47|CFLAR|CHN2|ERP29|FKBP11|GLO1|GMFG|GPR183|GTF3A|HIST1H2AC|HSP90B1|ITGAE|MANF|MIR155HG|MNDA|MRPL3|MTDH|NGLY1|PDE4B|PHACTR1|PHF16|PLAC8|POLR3G|PPIB|RILPL2|RNASE6|SMC6|SRPRB|TCF4|TFRC|THYN1|TNFAIP8|UGCG|VOPP1|EXCLUDED_GENES:|ENTPD1
Human Immune_Kong10_2491genes_ImmPort_CD40LandAnti-IgMvsControl (20460173-ImmPortCD40LandAnti-IgMvsControl)	GeneSigDB	73	1596	26.6983	4.95716	4.57393	1	9.34037	3.32026e-15	1.28359e-12	++	ALG3|ARID3A|BCL2|BPGM|C11ORF80|C7ORF23|CCL18|CCL22|CCR7|CD200|CD37|CD44|CD47|CD69|CDYL|CFLAR|CHD1|CHST7|CKAP4|COPB2|DLEU1|DUSP5|ECI1|ELL2|ENOSF1|ERP29|FNDC3A|GCLC|GMFG|GPD2|GPR183|HSP90B1|IDH3A|IL10|IL10RA|IL2RA|IQGAP2|ITGAE|LEPROTL1|LILRA2|LILRA4|LITAF|LYN|MAN1A1|MAPKAPK2|MARCKS|MAT2A|MCM2|MINA|NEK3|OAS1|P2RX5|PCK2|PEBP1|PHF16|PIAS2|PLAGL1|PLCL2|PLK3|POLR3G|RDX|SMARCA2|SP100|ST6GALNAC4|TGFBR2|TG…
CD40_Burkitt_lymphoma_UP	SignatureDB	19	99	1.65498	1.27496	19.1919	1	13.6044	3.66463e-15	1.37379e-12	++/*+	ADAM8|BATF|BCL2|CCL22|CCR7|CD44|CFLAR|CHD1|EHD1|ELL2|GPR183|LITAF|LYN|MAPKAPK2|PHACTR1|RAC2|TCEB3|TNFAIP8|VOPP1|EXCLUDED_GENES:|IRF4
Human StemCell_Bhattacharya05_2843genes (16207381-Table1Sa)	GeneSigDB	97	2568	42.9516	6.15889	3.77726	1	8.77567	8.74203e-15	3.18081e-12	+*	ABCE1|ABHD10|AEN|ANP32A|AP3B1|ARID3A|ATP1B3|AVEN|B9D1|C10ORF2|C16ORF88|C19ORF10|CASP10|CD200|CD44|CHD1|CHML|CLINT1|COPB2|CTR9|CYB5B|DBN1|DCAF17|DLEU1|DNMT3A|DUSP5|EML4|ERP29|FKBP11|FNBP1L|FZD6|GCLC|GLO1|GNL3|GPD2|GTF3A|HEATR6|HK2|HSP90B1|IGSF3|ITGAE|IVNS1ABP|KCTD5|KIF14|LAG3|LMAN1|LSG1|MANF|MCM2|METTL8|MEX3C|MTHFD1|NETO2|NIPA2|NOC3L|NOLC1|OXSR1|PAK1|PAK2|PARL|PDCD11|PDLIM1|PEBP1|PHACTR2|PIM2|PLBD…
KRIGE_RESPONSE_TO_TOSEDOSTAT_24HR_DN	MSigDB_C2	54	1008	16.8507	3.98681	5.35714	1	9.31805	4.38224e-14	1.50591e-11	++/+*	ABCE1|ACPP|ADRB2|ALG3|C10ORF2|C18ORF25|CABLES1|CCDC113|CCDC86|CHML|CREB3L2|CSDA|DDI2|DLEU1|EBNA1BP2|FAM46C|FTSJ1|GNL3|GPR183|GRWD1|HIST1H1C|HPDL|IDH3A|IKZF1|IPO4|LRRC33|MARCKS|METTL8|MINA|MLKL|NOC3L|NOLC1|PARVB|PDCD11|PEBP1|PHACTR1|PIAS2|PNP|POLR1C|POLR3G|RNF126|RRP9|SACS|SELRC1|SLC19A2|SLC25A30|SLC38A5|SLC43A3|TCF4|TFRC|TLE4|TRAFD1|UCK2|UMPS
Splenic_marginal_zone_Bcell_gt_GC_Bcell	SignatureDB	14	51	0.853878	0.915452	27.451	1	14.3602	7.93589e-14	2.65338e-11	+*	BCL2|CCDC50|CD44|DLEU1|FAM129C|GPX7|HIST1H2AC|HK2|LEPROTL1|MPEG1|OAS1|PDE4B|S1PR1|SLA
Mouse Lung_not_cancer_Woodruff05_2037genes (16166618-SuppTable3)	GeneSigDB	61	1308	21.8822	4.5127	4.66361	1	8.66837	3.8205e-13	1.18159e-10	++	ACPP|ADAM8|ADRB2|ARHGEF3|ARNT2|ATXN7L1|BCL2|CACNA1D|CARD11|CCL22|CCR7|CD200|CD37|CD47|CDK12|CDYL|CELF2|CHN2|CKAP4|CLINT1|DNMT3A|DOCK10|EHHADH|FAM46C|FKBP11|FNBP1L|GAB1|GAB2|GPR183|HCK|HK2|IGHM|IGSF3|IKZF1|IQGAP2|ITGAE|IVNS1ABP|KCNA3|LEPREL1|LITAF|LMAN1|LYN|MAP3K5|MARCKS|MLKL|MTDH|NGLY1|OXSR1|P2RY10|PARP4|PLAC8|PLBD1|PRKCB|RAB7L1|RILPL2|SLAMF7|SMC6|ST6GALNAC4|TFRC|TLE1|VASH2|EXCLUDED_GENES:|BLNK|B…
Human StemCell_Majeti09_3024genes (19218430-TableS3)	GeneSigDB	99	2817	47.1154	6.40235	3.51438	1	8.104	3.80511e-13	1.18159e-10	++	ACSM3|ADRB2|ANKRD12|ANP32A|ANXA11|AP3M2|ARMC7|ATXN7L1|BBIP1|BCL2|BCL3|BMPR2|BSPRY|C16ORF88|C18ORF25|C1ORF186|C7ORF23|CABLES1|CCDC113|CCR7|CD44|CD47|CD69|CDK12|CDYL|CELF2|CHST2|CNPY3|CXORF21|CYB5B|DOCK10|EHD1|ELOVL7|EPS15L1|FASTKD1|FZD6|GABPB1|GLO1|GYG1|HIST1H2BB|HK2|IDH3A|IL10RA|IL2RA|IQGAP2|IRF2BP2|IVNS1ABP|KCTD5|KIAA0226L|KIF14|KPTN|LEPROTL1|LILRA2|LILRB2|LITAF|LPCAT4|MAT2A|MTDH|NETO2|NFKBIB|NF…
Human Lymphoma_Wright03_44genes (12900505-Figure3)	GeneSigDB	11	28	0.467105	0.676886	39.2857	1	15.5608	4.17625e-13	1.26011e-10	++	BATF|BCL2|CSNK1E|IGHM|MARCKS|P2RX5|PIM2|SLA|SP140|SPIB|TCF4|EXCLUDED_GENES:|CCND2|FUT8|IRF4|PIM1|PTPN1
Human Lypmhoma_Leval07_832genes (17284527-TableS2)	GeneSigDB	41	654	10.9345	3.2364	6.26911	1	9.28979	4.49698e-13	1.32457e-10	++	ANP32A|ARID3A|B9D1|C19ORF10|CCL22|CCR7|CD200|CD47|CKAP4|CREB3L2|DCAF17|EHD1|FAM46C|FKBP11|GMPPB|GPX7|HEATR6|HK2|IGHM|IGSF3|MANF|NFKBID|PDLIM1|PIM2|RAB30|SEC13|SEC61A1|SEC61B|SLC33A1|SP100|SP110|SPIB|TBC1D27|TCF4|TMEM184B|TMEM39A|TRAM2|TSHZ1|UBA5|ZADH2|ZNF101
DIAZ_CHRONIC_MEYLOGENOUS_LEUKEMIA_UP	MSigDB_C2	62	1377	23.034	4.62535	4.50254	1	8.42446	1.09598e-12	3.1531e-10	++/*+	ABCE1|ACSM3|ADAM8|ALG3|ANP32A|AP3B1|ARHGEF3|CASP10|CD47|CDYL|CFLAR|CHST2|CNBP|COPB2|DCTD|DLEU1|EHD1|EIF4G1|ENOSF1|FECH|GCDH|GCLC|GLO1|GNL3|HK2|IKZF1|IQGAP2|ITGAE|LMAN1|LYN|MAP3K5|MARCKS|MRPL3|MTHFD1|NDUFV2|NOLC1|OXSR1|P2RX5|PARVB|PCK2|PDCD4|PEBP1|PNP|POLR1C|PTPLA|RAC2|RAP1GDS1|SLA|SLC38A2|SMARCA2|SMARCC1|STAM|STAT3|SUB1|TARS|TFRC|TLK1|TNFAIP8|UBE2E3|WDR11|XK|ZMYND11|EXCLUDED_GENES:|PIM1
RUTELLA_RESPONSE_TO_HGF_DN	MSigDB_C2	24	231	3.86582	1.93917	10.3896	1	10.3829	1.24151e-12	3.49063e-10	++/++	ACPP|ADAM8|ANP32A|CELF2|CNPY3|CSNK1E|GTF3A|IER5|IQGAP2|KIAA0226L|LILRA2|LILRB2|NEK3|PHACTR1|PLAC8|PLCL2|PNP|PRKCB|RNF138|SIK3|SMARCC1|SP110|TLE4|TRIT1|EXCLUDED_GENES:|SH3BP5
Human Breast_van'tVeer02_2460genes_Ergenes (11823860-SuppTable3)	GeneSigDB	77	1968	32.9157	5.45826	3.9126	1	8.07663	1.7323e-12	4.76229e-10	++	ADAM8|ADTRP|AFF3|ARNT2|ATP1B3|BCL2|C5ORF30|C5ORF45|CACNA1D|CCL18|CCR7|CD44|CD47|CD69|CHML|CHST2|CKAP4|COL9A3|CREB3L2|CSDA|CTR9|CYB5R2|DBN1|DNMT3A|ECI1|EML4|GMFG|GNPTAB|GPR183|HCK|HEATR6|HIST1H2AC|IGHM|IKZF1|IL10RA|IVNS1ABP|KIF13B|KIF14|LILRB2|LPCAT4|LYN|MAP3K5|MARCKS|NABP1|P2RY10|PARVB|PDCD4|PDE4B|PHACTR2|PIM2|PLAC8|PLEKHG1|PNP|PTPLA|RAB7L1|RDX|RILPL2|RNF138|SACS|SEC13|SEC61A1|SLA|SLAMF7|SLC43A3|…
KRIGE_RESPONSE_TO_TOSEDOSTAT_6HR_DN	MSigDB_C2	48	909	15.2045	3.79135	5.28053	1	8.65008	2.16368e-12	5.81889e-10	++/+*	ABCE1|ACPP|ADRB2|ALG3|C10ORF2|CABLES1|CCDC113|CCDC86|CHML|CHST7|CREB3L2|CSDA|DDI2|DLEU1|EBNA1BP2|EHD1|FAM46C|GNL3|GPR183|GRWD1|HPDL|IDH3A|IKZF1|IPO4|LRRC33|MARCKS|METTL8|MINA|MLKL|NOLC1|PDCD11|PEBP1|PHACTR1|PIAS2|PNP|POLR1C|POLR3G|RNF126|RRP9|SACS|SELRC1|SLA|SLC19A2|SLC25A30|SLC43A3|TFRC|UCK2|UMPS
Human BoneMarrow_Zhan07_2181genes (17023574-TableS1)	GeneSigDB	70	1717	28.7226	5.12294	4.07688	1	8.05737	3.31595e-12	8.728e-10	++	ANP32A|ARHGEF3|ARMC7|ATP13A3|AVEN|BCL2|BMPR2|C7ORF23|C9ORF91|CD47|CFLAR|CHD1|CKAP4|CNBP|CSNK1E|CTR9|DCTD|EBNA1BP2|EML4|EPM2AIP1|ERP29|FAM46C|GNPTAB|GYG1|HIST1H1C|HIST1H2AC|IER5|IKZF1|LITAF|MAP3K5|MAPKAPK2|MARCKS|MAT2A|METTL13|MLKL|MTDH|MTHFD1|NDUFV2|NEK3|NETO2|NOSIP|PARVB|PDE4B|PEBP1|PLCL2|PRKCB|PTPN2|RAB30|SEC61A1|SEC61B|SIK3|SLC33A1|SLC38A2|SMARCA2|SMARCC1|ST3GAL5|SUB1|TARS|TCEB3|TCF4|TET2|TFRC…
MODULE_361	MSigDB_C4	19	147	2.45794	1.54998	12.9252	1	10.6724	6.04463e-12	1.52608e-09	+*	BCL2|CD200|CD37|CXORF21|FAIM3|HEATR6|IGHM|IL10RA|KCNA3|KIAA0226L|LBH|P2RY10|PLAC8|PLCL2|PRKCB|SELRC1|SLC27A5|SMCHD1|SP140|EXCLUDED_GENES:|FOXP1
Human Lymphoma_Sandeep06_217genes (16760443-SuppTable2)	GeneSigDB	19	150	2.50651	1.56464	12.6667	1	10.5414	8.69356e-12	2.15096e-09	++	ADTRP|BATF|CD44|CFLAR|CYB5R2|DLEU1|DOCK10|GLO1|GTF3A|HCK|IL10RA|KIAA0226L|LIMD1|NOLC1|RAB7L1|RASGRF1|SLA|STAT3|UCK2|EXCLUDED_GENES:|ENTPD1|IL16|PIM1|PTPN1
RUTELLA_RESPONSE_TO_HGF_VS_CSF2RB_AND_IL4_UP	MSigDB_C2	30	403	6.74277	2.55463	7.44417	1	9.10395	1.07889e-11	2.61704e-09	++/++	ACPP|ATP13A3|C6ORF106|CCL18|CD47|CNPY3|FASTKD1|GPD2|GTF3A|HK2|IL10|IQGAP2|KIAA0226L|LILRA2|LILRB2|PCK2|PHACTR1|PLCL2|PNP|PRKCB|RDX|SCAMP2|SIK3|SLAMF7|SLC43A3|SP110|TCEB3|TFRC|TLE4|TRIT1|EXCLUDED_GENES:|ENTPD1|SH3BP5
BCL6_ChIP-CHIP_all_Ci	SignatureDB	99	2989	49.9817	6.56708	3.31214	1	7.46425	1.28289e-11	3.05204e-09	++	ABCE1|ABHD10|AFF3|ALG3|ANKRD12|AP3B1|ARID3B|ATP1B3|AVEN|B4GALT1|BCL2|BMPR2|BPGM|C1ORF186|C7ORF23|CCDC50|CD37|CD69|CHML|CHST2|CHST7|CNBP|COCH|CXORF21|CYB5B|DCAF17|DUSP5|EHD1|EML4|EPM2AIP1|ERCC6L2|ERP29|FAIM3|FNDC3A|FTSJ1|FZD6|GABPB1|HCK|HIST1H2AC|HIST1H2BB|HIVEP1|HSP90B1|IER5|IL10RA|IQGAP2|IRF2BP2|IVNS1ABP|KIAA0226L|KIF14|KPTN|LRRC33|LSG1|LYN|MAP3K5|MAPKAPK2|MARCKS|MAT2A|MCM2|METTL8|MPEG1|MTDH|NAB…
Human Leukemia_Zangrando09_1001genes (19549311-SuppTable2-MMLandPhenotype)	GeneSigDB	38	641	10.721	3.20068	5.92824	1	8.52289	1.78582e-11	4.16837e-09	++	AKIRIN1|ARHGEF3|C7ORF23|CD200|CD44|CSDA|CSNK1E|ENOSF1|FAM129C|GAB1|GPD2|HCK|HIST1H1C|IDH3A|IGHM|LYN|MAP3K5|MARCH3|MARCKS|MAT2A|MLKL|MPEG1|MSRB1|NEK3|OAS1|PAK2|PARP15|PHACTR2|PION|PLAGL1|RAC2|RNASE6|SIK3|SLA|SRPRB|SUSD1|TBL1XR1|TET2|EXCLUDED_GENES:|BLNK|CCND2|ETV6
BROCKE_APOPTOSIS_REVERSED_BY_IL6	MSigDB_C2	18	140	2.33855	1.51154	12.8571	1	10.3613	2.3955e-11	5.48792e-09	++	ACPP|BCL3|CD44|DUSP5|ELL2|HCK|LITAF|LPCAT4|MAPKAPK2|MARCKS|OAS1|PIM2|SLA|STAT3|TGIF1|TMEM184B|ZBTB11|ZNF101|EXCLUDED_GENES:|IRF4|PIM1
NFkB_Up_all_OCILy3_Ly10	SignatureDB	13	64	1.06947	1.02438	20.3125	1	11.6466	4.03194e-11	9.06893e-09	+*	BATF|CCL22|CCR7|CD44|CFLAR|ELL2|GPR183|IL10|LITAF|LYN|MARCKS|MIR155HG|SMARCA2|EXCLUDED_GENES:|CCND2|IRF4|PIM1
MODULE_45	MSigDB_C4	35	573	9.588	3.03127	6.1082	1	8.38329	5.16925e-11	1.14194e-08	+*	ADAM8|ANKRD12|ARID3A|CD37|CD44|CELF2|FAIM3|GMFG|HCK|HIST1H2AC|IGHM|IKZF1|IL10RA|IQGAP2|LILRA2|LILRB2|LYN|MNDA|NFKBIB|P2RY10|PDE4B|PIM2|PLCL2|PLK3|PRKCB|RAC2|RNASE6|SLA|SP100|SP110|ST3GAL5|ST6GALNAC4|TGFBR2|TNFAIP8|TNFRSF13B|EXCLUDED_GENES:|CCND2|PIM1
BAELDE_DIABETIC_NEPHROPATHY_DN	MSigDB_C2	30	433	7.23576	2.64534	6.92841	1	8.60542	6.3638e-11	1.33435e-08	**/++	AP3B1|ATP13A3|CD200|CD47|CFLAR|CHST2|CREB3L2|CSDA|DCTD|FNBP1L|GAB2|GYG1|HSP90B1|IQGAP2|LITAF|MTDH|OAS1|PAK1|PDE4B|RDX|SMARCA2|SMARCC1|SP100|SUB1|TLE4|TLK1|TRAM2|UGCG|ULK2|USP46
Human Bladder_Osman06_1054genes (16740760-TableS1)	GeneSigDB	42	798	13.3452	3.56557	5.26316	1	8.03652	6.34184e-11	1.33435e-08	++	ASPHD2|C7ORF23|C9ORF91|CD44|CD47|CDK12|CELF2|CHD2|CHST2|EIF4G1|EPM2AIP1|EPS15L1|FAIM3|HIST1H1C|HIST1H2AC|HSP90B1|IKZF1|IRF2BP2|KIAA0226L|LEPROTL1|LILRA2|MARCKS|MEX3C|MTDH|NFKBIZ|NOSIP|P2RX5|PDCD4|PHACTR2|SCAMP2|SIK3|SMARCA2|SMARCC1|SP110|STAT3|TBL1XR1|TGFBR2|TLE4|TM2D3|TYMS|UBE2W|UGCG
Human Ovarian_Li09_2322genes_cisplatinresistance (19505326-SuppTable3)	GeneSigDB	71	1872	31.3109	5.34004	3.79274	1	7.43236	6.1838e-11	1.33435e-08	++	ACSM3|ALG3|ARHGAP24|ASPHD2|BCL3|BPGM|C5ORF30|CABLES1|CASP10|CCDC50|CD47|CFLAR|CHDH|CHML|CKAP4|COPB2|CREB3L2|CTR9|CYB5B|EHD1|EML4|ENOSF1|EPS15L1|ERN1|FAM46C|FKBP11|GCDH|GPD2|GYG1|IER5|IGSF3|IRF2BP2|KIF14|LIMD1|MAP3K5|MAPKAPK2|MARCKS|MCM2|MCOLN2|MINA|MSRB1|NETO2|NFKBIZ|NT5DC2|PARP3|PDE4B|PDLIM1|PEBP1|PHTF1|PLAGL1|PLEKHG1|PTPLA|PTPN2|RAB7L1|RNF138|SACS|SLC2A13|SMCHD1|SOGA2|STAT3|SUB1|TBL1XR1|TGFBR2|…
Human Bone_Heller08_693genes (18172295-SuppTable4)	GeneSigDB	27	359	6.00677	2.41078	7.52089	1	8.70806	9.48686e-11	1.92397e-08	++	ABCE1|ADRB2|AVEN|BCL2|BCL3|CD44|CFLAR|DOCK10|FKBP11|FNDC3A|GTF3A|IQGAP2|KIAA0226L|KLHL21|MRPL3|OAS1|P2RX5|PHACTR2|PIM2|PLCL2|PMM2|SLA|SLC33A1|TCF4|TLK1|TYMS|UCK2|EXCLUDED_GENES:|BLNK|CCND2|IRF4
Human Lymphoma_Chin09_1201genes (19377508-SuppTable1)	GeneSigDB	39	713	11.9238	3.37011	5.46985	1	8.0342	1.04312e-10	2.04833e-08	++	ADAMTS6|ADTRP|AICDA|ATXN7L1|BATF|BCL2|BSPRY|C1ORF186|CCL18|CCL22|CCR7|CD44|CD69|CFLAR|CHST2|DUSP5|FAM46C|FGD2|GAB2|GPD2|HCK|IL10|KIAA0226L|LILRB2|LITAF|MARCKS|MNDA|MOCOS|NFKBIZ|PARP15|PDCD4|PHACTR1|PLAC8|RAVER2|RDX|RNASE6|SLC25A30|ULK2|ZBTB32|EXCLUDED_GENES:|ENTPD1|IRF4
Human Breast_Walker10_3588genes (20174566-TableS1)	GeneSigDB	100	3146	52.6039	6.72408	3.17864	1	7.0487	1.03885e-10	2.04833e-08	++	ACSM3|ADAMTS6|ADPRH|ALG3|ARMC7|BATF|BBIP1|BCL3|BMPR2|C10ORF2|C16ORF88|C18ORF25|C5ORF30|CCDC113|CCDC50|CD37|CD44|CELF2|CLINT1|CNTNAP1|COPB2|DCTD|DHRS13|DOCK10|EPHB1|FAM46C|FECH|FTSJ1|GABPB1|GCLC|GMPPB|GNL3|GPX7|GTF3A|IDH3A|IL2RA|IVNS1ABP|KIF14|KLHL21|LAG3|LITAF|LPCAT4|LPIN2|MAN1A1|MAP3K5|MAT2A|MCM2|METTL13|METTL8|MINA|MRPL3|MSRB1|MYOCD|NABP1|NDUFV2|NETO2|NFKBIB|NOLC1|OXSR1|P2RX5|PAK1|PARP3|PARVB|P…
RUTELLA_RESPONSE_TO_CSF2RB_AND_IL4_UP	MSigDB_C2	26	337	5.63866	2.33785	7.71513	1	8.70944	1.22144e-10	2.361e-08	++/++	ADAM8|ATP1B3|C6ORF106|CCL18|CCL22|CCR7|CD47|CELF2|CFLAR|CSNK1E|DUSP5|FASTKD1|GPD2|IER5|IL10|LITAF|MARCKS|NEK3|NETO2|RDX|SCAMP2|SLAMF7|SMARCC1|TCEB3|TFRC|TNFAIP8|EXCLUDED_GENES:|IRF4
MODULE_188	MSigDB_C4	17	137	2.29257	1.49643	12.4088	1	9.82834	1.52525e-10	2.9029e-08	+*	BCL2|CD200|CXORF21|FAIM3|HEATR6|IGHM|IL10RA|KCNA3|KIAA0226L|OAS1|P2RY10|PLAC8|PRKCB|SELRC1|SLC27A5|SMCHD1|SP110|EXCLUDED_GENES:|FOXP1
ZHENG_BOUND_BY_FOXP3	MSigDB_C2	31	487	8.14696	2.80016	6.3655	1	8.16133	2.49755e-10	4.68139e-08	++	ADAMTS6|ARHGEF3|ATP1B3|BCL2|BTLA|CCR7|CD200|CD44|CD69|CELF2|CHD2|DOCK10|EPS15L1|FAM46C|GPD2|GPR183|IL2RA|LEPROTL1|MAN1A1|MAP3K5|NDUFV2|NFKBIZ|P2RY10|PDE4B|PIAS2|S1PR1|SIK3|SP100|TGFBR2|TLK1|VOPP1|EXCLUDED_GENES:|FOXP1|IRF4
Human Viral_Feuerhake05_31genes (15870177-FigureS3)	GeneSigDB	7	12	0.200969	0.444379	58.3333	1	15.3001	2.56502e-10	4.7361e-08	+*	BCL2|CCL22|CCR7|CD44|CFLAR|IL2RA|LITAF|EXCLUDED_GENES:|CCND2|IRF4
Human Immune_Kong10_1790genes_ImmPort_Anti-IgMvsControl (20460173-ImmPortAnti-IgMvsControl)	GeneSigDB	51	1153	19.2771	4.25394	4.42324	1	7.45729	2.61391e-10	4.7554e-08	++	ARID3A|BCL2|BPGM|C7ORF23|CCL18|CCL22|CCR7|CD200|CD37|CD47|CFLAR|CHD1|CKAP4|CLINT1|COPB2|CYB5B|DUSP5|ECI1|EHD1|ENOSF1|FZD6|GCDH|GMFG|GPD2|HIVEP1|IDH3A|IKZF1|ITGAE|LEPROTL1|LILRA2|LYN|MAPKAPK2|MAT2A|NEK3|OAS1|P2RX5|PCK2|PDCD4|PEBP1|PIM2|PLCL2|PLK3|POLR3G|PRKCB|RNF126|SEC61B|SMARCC1|SPIB|TGFBR2|TNFAIP8|TYMS|EXCLUDED_GENES:|FUT8|IRF4|PIM1|PTPN1|SH3BP5
Human Liver_Tzur09_1908genes (19841744-TableS5)	GeneSigDB	61	1534	25.6621	4.86852	3.97653	1	7.25845	2.74205e-10	4.91622e-08	+*	ABHD10|ACSM3|AKIRIN1|ANKRD12|ANP32A|AP3B1|CCDC50|CDYL|CFLAR|CHST2|CLINT1|CNBP|COCH|CSDA|CYB5B|DCAF17|DCTD|DUSP5|ELL2|EML4|FNDC3A|GAB1|GABPB1|GCLC|IRF2BP2|KIF14|LMAN1|LPIN2|LYN|MAN1A1|MAT2A|METTL13|MPEG1|NOLC1|OXSR1|PAK1|PAK2|PDCD4|PECR|RAP1GDS1|RDX|RNF138|SEC61A1|SIK3|SLC33A1|SLC38A2|SLC43A3|SMARCA2|SMARCC1|SMCHD1|ST6GALNAC4|TBL1XR1|TFRC|TGFBR2|TGIF1|TOR1AIP1|TYMS|U2SURP|UCK2|UGCG|ZADH2
Human Leukemia_Li09_419genes (19755675-TableS6)	GeneSigDB	28	405	6.77318	2.56099	6.91358	1	8.28851	2.95073e-10	5.21478e-08	++	ANP32A|CD37|CD44|CD69|CKAP4|GYG1|HCK|HIST1H1C|IQGAP2|LILRA2|LITAF|MARCKS|P2RX5|PDE4B|PDLIM1|PION|PNP|PRKCB|RAC2|SLA|SMARCA2|SMCHD1|SOGA2|SPIB|TLE1|TRAM2|UBE2E3|UCK2|EXCLUDED_GENES:|BLNK|CCND2|SH3BP5
IMMUNE	SHIPP	37	685	11.4623	3.30992	5.40146	1	7.71549	4.57293e-10	7.96785e-08	++	ANXA11|B4GALT1|BCL3|CCL18|CCL22|CCR7|CD44|CD69|CELF2|CHST2|CKAP4|CREB3L2|CSDA|DUSP5|FAIM3|GCLC|GYG1|HCK|HK2|IER5|IL10RA|LAG3|LBH|LILRA6|LITAF|OAS1|PDLIM1|PION|PLAGL1|RAB7L1|SLA|SLAMF7|SNX18|SP110|ST3GAL5|STAT3|TGFBR2|EXCLUDED_GENES:|CCND2
SMID_BREAST_CANCER_NORMAL_LIKE_UP	MSigDB_C2	30	471	7.87635	2.75479	6.36943	1	8.03098	4.8365e-10	8.31005e-08	++/**	CASP10|CCR7|CD37|CD69|CELF2|DOCK10|FAIM3|GMFG|GPR183|IGHM|KIAA0226L|LEPREL1|LILRA4|LOC100505650|LPCAT4|LYN|P2RX5|PLAC8|PLCL2|PRKCB|RAC2|RNASE6|SLA|SP110|SP140|SPIB|TCF4|TESC|TLE4|TNFAIP8
MARZEC_IL2_SIGNALING_UP	MSigDB_C2	15	112	1.87107	1.35299	13.3929	1	9.70363	6.24785e-10	1.0588e-07	+*/**	BCL2|GNL3|HK2|IL10|IL10RA|IL17RB|IL2RA|MAPKAPK2|PDCD11|PNP|POLR1C|STAT3|TNFAIP8|UCK2|UMPS|EXCLUDED_GENES:|CCND2|PIM1
PENG_GLUTAMINE_DEPRIVATION_DN	MSigDB_C2	25	337	5.63608	2.33876	7.4184	1	8.27958	6.34993e-10	1.06155e-07	*+/+-	ALG3|ATP1B3|DLEU1|EBNA1BP2|EIF4G1|GCDH|HSP90B1|IDH3A|MANF|MRPL3|MTDH|MTHFD1|NOLC1|PNP|PPIB|RNF126|RRP9|SACS|SEC61B|SMARCC1|TFRC|TUBB4A|U2SURP|UCK2|UMPS
Blood_Module-1.3_B_cells	SignatureDB	11	53	0.887032	0.931279	20.7547	1	10.8592	1.01853e-09	1.68003e-07	++	AFF3|CD200|FAM129C|KIAA0226L|P2RX5|PLEKHG1|SMC6|SP140|SPIB|TCF4|TLE1|EXCLUDED_GENES:|BLNK
OSMAN_BLADDER_CANCER_DN	MSigDB_C2	27	400	6.6883	2.54379	6.75	1	7.98481	1.04385e-09	1.69913e-07	+*/++	C7ORF23|C9ORF91|CD47|CDK12|CELF2|CHD2|EPM2AIP1|EPS15L1|FAIM3|HIST1H1C|HIST1H2AC|IKZF1|KIAA0226L|LBH|LEPROTL1|NOSIP|P2RX5|PDCD4|SIK3|SMARCA2|SMARCC1|SP110|STAT3|TGFBR2|TLE4|TM2D3|ZNF275
MODULE_301	MSigDB_C4	17	156	2.61051	1.59625	10.8974	1	9.01457	1.18374e-09	1.90182e-07	+*	BCL2|CD200|CXORF21|FAIM3|HEATR6|IGHM|IL10RA|KCNA3|KIAA0226L|LBH|OAS1|P2RY10|PLAC8|PRKCB|SELRC1|SLC27A5|SMCHD1|EXCLUDED_GENES:|FOXP1
Human StemCell_Nilsson07_3742genes (17616640-TableS1)	GeneSigDB	107	3617	60.4967	7.13079	2.95825	1	6.52147	1.21993e-09	1.93484e-07	++	ABCE1|ABHD10|ACPP|ACSM3|ACTR8|ALG3|ANXA11|AP3B1|AP3M2|ARHGEF3|ATP13A3|ATP1B3|AVEN|B4GALT1|BCL2|C10ORF2|C16ORF5|C5ORF45|C7ORF23|C9ORF91|CABLES1|CCR10|CD200|CD44|CD47|CD69|CDYL|CHDH|CHST2|CHST7|CLINT1|COCH|COPB2|CSDA|CSNK1E|CTR9|CYB5B|DNMT3A|EHD1|EHHADH|FTSJ1|GCDH|GLO1|GMFG|GNL3|GNPTAB|GPX7|GTF3A|HCK|HEATR6|HIST1H1C|HIST1H2AC|HOOK1|HPDL|HSP90B1|IER5|IPO4|IVNS1ABP|KLF8|LBH|LEPROTL1|LILRA2|LMAN1|LYN|…
Human Embryo_Heim07_2325genes (17880687-TableS2)	GeneSigDB	61	1599	26.7479	4.9582	3.81488	1	6.90818	1.37292e-09	2.12305e-07	++	AFF3|ANP32A|ANXA11|AP3B1|ATP13A3|CD200|CD44|CHML|CHN2|CNTNAP1|COCH|COL9A3|DCAF17|DCTD|DUSP5|ELL2|EML4|FNBP1L|GPD2|HK2|HSP90B1|IL17RB|IQGAP2|KLF8|LIMD1|LYN|MAP3K5|MAPKAPK2|MARCKS|METTL8|MTDH|NFKBIZ|PDE4B|PDLIM1|PHACTR2|PIAS2|PIM2|PLAGL1|PNP|POLR3G|PTPRJ|SLC43A3|TBL1XR1|TCF4|TFRC|TGIF1|TLE1|TLK1|TNFAIP8|TOX2|TRAM2|TSHZ1|UBE2W|UGCG|USP46|WDFY1|WDR11|ZADH2|ZNF101|ZNF614|ZSCAN2|EXCLUDED_GENES:|BLNK|BM…
GUTIERREZ_CHRONIC_LYMPHOCYTIC_LEUKEMIA_DN	MSigDB_C2	11	56	0.936407	0.958542	19.6429	1	10.4989	1.90216e-09	2.90514e-07	**/++	C11ORF80|CCR7|COL9A3|FAIM3|GCLC|IGSF3|KIAA0226L|MAP3K5|NEK3|NOSIP|PEBP1
MODULE_238	MSigDB_C4	17	162	2.70698	1.62595	10.4938	1	8.79058	2.12449e-09	3.20513e-07	+*	BCL2|CD200|CXORF21|FAIM3|HEATR6|IGHM|IL10RA|KCNA3|KIAA0226L|OAS1|P2RY10|PLAC8|PRKCB|SELRC1|SLC27A5|SMCHD1|SP110|EXCLUDED_GENES:|FOXP1
DIRMEIER_LMP1_RESPONSE_LATE_UP	MSigDB_C2	11	57	0.954001	0.967655	19.2982	1	10.3818	2.32195e-09	3.46083e-07	+*/**	ANP32A|ATP13A3|BATF|CCL22|CD44|CFLAR|LITAF|LYN|MARCKS|SPIB|VOPP1
Human Breast_Yau08_1518genes_OxidativeStress (18631401-TableS3)	GeneSigDB	49	1156	19.3299	4.25646	4.23875	1	6.9706	2.47746e-09	3.64865e-07	++	AEN|BATF|C10ORF2|C18ORF25|C5ORF30|CCDC86|CD44|CSNK1E|DCTD|DUSP5|ELL2|FECH|GABPB1|GCLC|HIST1H2AC|HK2|IER5|IGSF3|KCTD5|KLHL21|LIMD1|LSG1|LYN|MANF|MARCKS|MOCOS|NOC3L|NOLC1|NT5DC2|PDCD11|PDCD4|PLAGL1|PLBD1|PLK3|POLR1C|RAB7L1|RNF126|RRP9|SELRC1|SIK3|SMARCA2|SOGA2|TGIF1|THYN1|TNFAIP8|TRAFD1|TSEN2|UBA5|UCK2|EXCLUDED_GENES:|BLNK|FUT8|PIM1
PUJANA_ATM_PCC_NETWORK	MSigDB_C2	56	1429	23.8993	4.7014	3.91882	1	6.82791	2.75489e-09	4.00949e-07	++	ABCE1|ANKRD12|ANP32A|AP3B1|BCL2|C6ORF123|C7ORF23|CASP10|CD37|CD47|CDKL1|CFLAR|CHST7|CLINT1|CNBP|CNPY3|CTR9|DLEU1|DOCK10|FTSJ1|GMFG|GPD2|GPX7|GTF3A|HK2|IKZF1|IL10RA|LILRA3|LYN|MARCH3|MAT2A|MCM2|MRPL3|MTDH|NOLC1|OAS1|OXSR1|P2RY10|PAK2|PARP3|PCYT1A|PHACTR1|PIAS2|PIM2|PLCL2|POLR3G|PTPN2|RAB30|RAC2|RNF126|SMCHD1|SP100|SP110|SP140|TNFAIP8|ZNF101|EXCLUDED_GENES:|BLNK|ETV6|IL16|IRF4|PTPN1
Human Immune_Allen10_2900genes (20220088-SuppTable1)	GeneSigDB	66	1838	30.7326	5.28427	3.59086	1	6.67403	3.0398e-09	4.37272e-07	++	ADAM8|ADTRP|AFF3|ANP32A|ARHGAP24|BSPRY|CCDC113|CCDC50|CCL22|CD44|CD47|CDYL|CELF2|CFLAR|CHD1|CHST2|CKAP4|CLECL1|COCH|CSDA|CYB5B|DHRS13|EHD1|ELOVL7|FNBP1L|FZD6|GAB1|HOOK1|IGSF3|IQGAP2|IVNS1ABP|KIF13B|KLF8|LEPREL1|LILRA2|LILRA4|LILRA6|LILRB2|LSG1|MARCH3|MARCKS|METTL8|MNDA|PARVB|PDCD4|PDLIM1|PEBP1|PHACTR1|PHF16|PIAS2|PLAGL1|PLBD1|PLEKHG1|PNP|PRKCB|RAC2|RASGRF1|RDX|RILPL2|SIK3|SLAMF7|SLC19A2|SLC43A3|S…
Human Lymphoma_Chng09_290genes (18974375-TableS5a)	GeneSigDB	17	167	2.79519	1.65164	10.1796	1	8.60042	3.39074e-09	4.82148e-07	++	ADAMTS6|ARHGAP24|C5ORF45|CCDC50|CD37|FAM129C|HEATR6|IGHM|KIAA0226L|LYN|MARCKS|NFKBID|RILPL2|SH2D3C|SP110|SP140|SPIB
Glutamine_starve_DN	SignatureDB	23	312	5.21979	2.25222	7.37179	1	7.89451	3.50869e-09	4.9325e-07	*+/+-	ALG3|ATP1B3|DLEU1|EBNA1BP2|EIF4G1|GCDH|HSP90B1|IDH3A|MANF|MRPL3|MTHFD1|NOLC1|PDCD4|PPIB|RNF126|RRP9|SACS|SEC61B|SMARCC1|TFRC|TUBB4A|UCK2|UMPS
Resting_dendritic_cell_GNF	SignatureDB	13	91	1.52303	1.22128	14.2857	1	9.39747	3.91207e-09	5.43778e-07	+*	C1ORF186|CCDC50|DUSP5|EPHB1|IDH3A|KCTD5|LEPREL1|LILRA4|MAPKAPK2|TCF4|TOX2|UGCG|ZFAT|EXCLUDED_GENES:|IRF4
LEE_BMP2_TARGETS_DN	MSigDB_C2	41	881	14.7335	3.74318	4.6538	1	7.01716	4.07355e-09	5.59932e-07	*+/+*	ABCE1|ABHD10|ADPGK|AEN|AKIRIN1|ALG3|C16ORF88|CCDC86|CDYL|CHD1|DCTD|DDI2|EBNA1BP2|EHD1|FASTKD1|GNL3|GNPTAB|GRWD1|HK2|IDH3A|IER5|LMAN1|MANF|MAT2A|MCM2|MTHFD1|NABP1|NETO2|NOC3L|NOLC1|PDCD11|RNF138|SACS|SMCHD1|SPATA5|ST6GALNAC4|TFRC|TOMM70A|UCK2|UMPS|USP46|EXCLUDED_GENES:|FUT8
GARY_CD5_TARGETS_DN	MSigDB_C2	27	429	7.17079	2.63082	6.29371	1	7.53727	4.71706e-09	6.41261e-07	++/++	AFF3|ANP32A|C10ORF2|CDK12|CYB5B|DLEU1|EBNA1BP2|GPR183|HSP90B1|IKZF1|KIF14|MANF|METTL13|NOLC1|OAS1|PNP|POLR1C|POLR3G|PPIB|RAB7L1|RNF138|RRP9|SP140|TCEB3|TFRC|TNFAIP8|UMPS|EXCLUDED_GENES:|BLNK
MYD88_Ngo_etal	SignatureDB	21	266	4.45065	2.07781	7.89474	1	7.96479	5.07909e-09	6.82971e-07	++	ADAM8|BATF|BCL3|CCDC86|CCR7|CD69|CYB5R2|ELL2|EPHB1|ERCC6L2|HCK|IL10|NFKBIZ|PLK3|RAB7L1|RNF183|SACS|SNX18|SOGA2|TNFRSF13B|ZSCAN2|EXCLUDED_GENES:|CCND2|PIM1
DEURIG_T_CELL_PROLYMPHOCYTIC_LEUKEMIA_DN	MSigDB_C2	23	319	5.33828	2.27595	7.21003	1	7.76015	5.35046e-09	7.11727e-07	*+/++	ADRB2|ANKRD12|BCL2|C6ORF106|CFLAR|CTR9|DUSP5|EML4|ENOSF1|LEPROTL1|MAN1A1|MAP3K5|NDUFV2|P2RY10|PDE4B|PHACTR2|PION|PRKCB|RDX|STAT3|TGFBR2|TOR1AIP1|TRAFD1
SHAFFER_IRF4_TARGETS_IN_ACTIVATED_DENDRITIC_CELL	MSigDB_C2	11	64	1.07034	1.02483	17.1875	1	9.6891	8.42573e-09	1.10888e-06	+*	BSPRY|DUSP5|ELL2|FKBP11|HSP90B1|PIM2|RAB30|SLAMF7|SLC38A2|SUB1|UCK2|EXCLUDED_GENES:|IRF4
LEE_RECENT_THYMIC_EMIGRANT	MSigDB_C2	19	224	3.74434	1.9113	8.48214	1	7.98183	8.57172e-09	1.11622e-06	++	CCR7|CHML|CSDA|FAM129C|HIST1H2AC|IGHM|MARCKS|MPEG1|NFKBIZ|P2RX5|PAK1|PDCD4|PDLIM1|PLAC8|RNASE6|RNF138|TCF4|TOX2|TYMS|EXCLUDED_GENES:|FUT8
Human Breast_Parker09_1918genes_IntrinsicGenes_Compilation (19204204-SupplementaryTable5)	GeneSigDB	62	1727	28.8875	5.13765	3.59004	1	6.44506	9.97336e-09	1.28521e-06	++	AFF3|AP3M2|ARNT2|AVEN|B4GALT1|BCL2|BSPRY|C19ORF10|C5ORF30|C9ORF91|CCL18|CFLAR|CHST2|CNTNAP1|COL9A3|CSDA|DBN1|EBNA1BP2|EIF4G1|ELL2|FA2H|FAM46C|FECH|FKBP11|FZD6|GPX7|GTF3A|GYG1|HEATR6|HIST1H1C|HIST1H2AC|HIST1H2BB|IQGAP2|KIF13B|LEPROTL1|LYN|MCM2|MTHFD1|NFKBIZ|NT5DC2|P2RY10|PDCD4|PDE4B|PEBP1|PIM2|PLAC8|RAB30|RDX|SLC19A2|SLC27A5|SMCHD1|SMU1|SP110|TARS|TBL1XR1|TFRC|TGFBR2|THYN1|TYMS|UBE2E3|WDR6|ZNF614|…
Human Viral_Chetaille09_501genes (19096012-TableS2)	GeneSigDB	27	445	7.44134	2.68168	6.06742	1	7.29343	1.02348e-08	1.3053e-06	++	AKIRIN1|ANP32A|CCR7|CD200|CD69|CNBP|CYB5B|IKZF1|KIAA0226L|MAP3K5|MINA|MRPL3|NDUFV2|NGLY1|NIPA2|NOLC1|PDCD4|PDE4B|SP100|SP110|SPIB|SUB1|TNFAIP8|TOMM70A|TOR1AIP1|TRIT1|UMPS|EXCLUDED_GENES:|BLNK
HELLER_HDAC_TARGETS_SILENCED_BY_METHYLATION_DN	MSigDB_C2	21	277	4.6331	2.12386	7.58123	1	7.70622	1.03912e-08	1.31173e-06	++/++	AVEN|BCL2|BCL3|CELF2|CFLAR|DOCK10|FKBP11|FNDC3A|IQGAP2|KLHL21|OAS1|P2RX5|PHACTR2|PIM2|PLCL2|PMM2|SLA|TCF4|TLK1|TYMS|UCK2|EXCLUDED_GENES:|BLNK|CCND2|IRF4
Human StemCell_Nuytten08_2072genes (17724462-TableS2)	GeneSigDB	64	1813	30.3162	5.26111	3.53006	1	6.40241	1.05599e-08	1.31955e-06	++	ADAM8|ADAMTS6|ADPGK|ADRB2|ANP32A|ANXA11|ARHGAP17|ARMC7|BMPR2|CD44|CD47|CD69|CFLAR|CHST7|CKAP4|COCH|CREB3L2|DNMT3A|EBNA1BP2|EHD1|EHHADH|FAM108C1|FZD6|GPD2|GYG1|HIVEP1|HK2|HOOK1|HSP90B1|IGSF3|KIF14|KLHL21|MAN1A1|MARCKS|MCM2|NDUFV2|NOC3L|NT5DC2|OAS1|OXSR1|PAK2|PCK2|PEBP1|PHTF1|PLAGL1|SIDT1|SLC38A5|SP100|SP140|SRPRB|SUB1|TBL1XR1|TCF4|TFRC|TGFBR2|THYN1|TLE4|TLK1|TM2D3|TYMS|UMPS|WDFY1|XK|ZNF586|EXCLUDE…
BCR	SHIPP	30	541	9.05374	2.95224	5.54529	1	7.09505	1.20037e-08	1.48498e-06	++	AICDA|ARHGAP17|CD37|CD44|COCH|CYB5R2|DBN1|DLEU1|EHD1|FAM129C|IGHM|IKZF1|IL17RB|KIAA0226L|LYN|MAPKAPK2|MCM2|NOLC1|P2RX5|PARP3|PDE4B|PIM2|PLEKHG1|PRKCB|RAC2|SPIB|TGIF1|TLE1|U2SURP|ZNF107|EXCLUDED_GENES:|BLNK|IL16|IRF4|SH3BP5
TARTE_PLASMA_CELL_VS_PLASMABLAST_DN	MSigDB_C2	22	306	5.11829	2.23141	7.18954	1	7.56549	1.21652e-08	1.49005e-06	*+/+*	ABCE1|ANP32A|ARID3A|ATP13A3|ATP1B3|BCL3|EBNA1BP2|IQGAP2|KIF14|MRPL3|MTHFD1|NDUFV2|PAK2|PDLIM1|PNP|PRKCB|RNASE6|SLA|TARS|TFRC|TYMS|UCK2|EXCLUDED_GENES:|CCND2|ENTPD1|PTPN1
FULCHER_INFLAMMATORY_RESPONSE_LECTIN_VS_LPS_UP	MSigDB_C2	31	575	9.61465	3.03775	5.3913	1	7.03987	1.3066e-08	1.5847e-06	++/++	ADAM8|ADTRP|AKIRIN1|ANP32A|CCL22|CDYL|CHST2|CYB5B|EML4|FASTKD1|FNDC3A|GTF3A|IRF2BP2|IVNS1ABP|LMAN1|LOC645638|MAP3K5|MARCH3|MPEG1|NDUFV2|NETO2|PHACTR2|PLK3|PNP|RAC2|SRPRB|ST3GAL5|SUB1|TBL1XR1|TCF4|UBE2W|EXCLUDED_GENES:|IRF4|SH3BP5
RUTELLA_RESPONSE_TO_CSF2RB_AND_IL4_DN	MSigDB_C2	22	310	5.18588	2.2468	7.09677	1	7.48359	1.53843e-08	1.84776e-06	++/++	ACPP|ANP32A|ATP13A3|CNPY3|GTF3A|HK2|IQGAP2|KIAA0226L|LILRA2|LILRB2|PCK2|PHACTR1|PLAC8|PLCL2|PNP|PRKCB|RNF138|SIK3|SLC43A3|SP110|TLE4|TRIT1|EXCLUDED_GENES:|ENTPD1|SH3BP5
Human EmbryonicStemCell_Thomas08_839genes (18689800-TableS5)	GeneSigDB	37	785	13.134	3.53996	4.71338	1	6.74188	1.75425e-08	2.08671e-06	++	ANP32A|ARID3A|ARNT2|BMPR2|CD44|CHD1|CHD2|CNBP|CSDA|CSNK1E|ELL2|FZD6|HSP90B1|IL2RA|IVNS1ABP|LBH|LIMD1|LITAF|LYN|MAPKAPK2|NFKBIB|NOLC1|PAK2|PDCD11|PDCD4|PDLIM1|PEBP1|POLR1C|SEC61A1|SLC19A2|SMARCC1|STAT3|TBL1XR1|TCEB3|TCF4|TLE1|ZMYND11|EXCLUDED_GENES:|CCND2|ETV6|FOXP1|PTPN1
NFkB_Up_HBL1	SignatureDB	18	211	3.52751	1.85468	8.53081	1	7.80324	1.93827e-08	2.28366e-06	+*	ADAM8|BATF|CCR7|CD44|EPHB1|HCK|IL10|IL12A|MARCKS|NOSIP|PLAGL1|PLK3|RAB7L1|RNF183|SLC38A5|SNX18|STAT3|TCEB3|EXCLUDED_GENES:|CCND2|IRF4
Tcell_PIind4x_Feske_Fig4	SignatureDB	12	86	1.43709	1.18756	13.9535	1	8.89467	2.0489e-08	2.39122e-06	+*	CD200|CD44|CD69|CFLAR|ELL2|GPR183|IL10|MIR155HG|NIPA2|NOLC1|SLA|TFRC|EXCLUDED_GENES:|FOXP1|IRF4
Human Leukemia_Mullighan07_838genes (17597811-SuppTable6)	GeneSigDB	34	691	11.5617	3.32397	4.92041	1	6.75045	2.43081e-08	2.81043e-06	++	ABHD10|ADRB2|ARHGEF3|BATF|C16ORF88|C5ORF30|C9ORF91|CD200|CNPY3|CXORF21|DBN1|DLEU1|ECI1|GNPTAB|HCK|IKZF1|IL2RA|LEPROTL1|LILRA2|LILRB2|MAN1A1|MAPKAPK2|MSRB1|PARL|PCYT1A|PDCD4|PTPLA|RAB7L1|RAC2|RNASE6|SLA|STAM|TGFBR2|TOR1AIP1
Human Leukemia_Rodriguez04_10genes (15501956-Table4)	GeneSigDB	5	7	0.117328	0.339603	71.4286	1	14.3776	2.61027e-08	2.98997e-06	+*	BCL2|CCR7|GAB1|LYN|TLE1
PENG_RAPAMYCIN_RESPONSE_DN	MSigDB_C2	19	244	4.07815	1.99243	7.78689	1	7.48925	3.42675e-08	3.88921e-06	*+/+*	ATP1B3|CD47|COPB2|EBNA1BP2|EIF4G1|GCDH|GLO1|HSP90B1|IDH3A|MANF|MTDH|P2RX5|PNP|PPIB|RRP9|TARS|TCEB3|TFRC|UCK2|EXCLUDED_GENES:|PTPN1
Human Viral_Urosevic07_341genes (17823660-TableS1b)	GeneSigDB	21	297	4.96611	2.19969	7.07071	1	7.28917	3.49147e-08	3.92664e-06	+*	ANKRD12|AP3B1|CASP10|CD200|CFLAR|CNBP|HIST1H2AC|LAG3|LPIN2|MCM2|MNDA|OAS1|PDE4B|PHF16|RAB7L1|SMCHD1|SP100|SP110|SP140|TRAFD1|TYMS|EXCLUDED_GENES:|IL16
Human BoneMarrow_Zhan07_458genes (17023574-TableS2)	GeneSigDB	23	354	5.92417	2.39545	6.49718	1	7.12845	3.72775e-08	4.1546e-06	+*	ABCE1|ADPGK|ALG3|ANKRD12|ATP13A3|AVEN|C10ORF2|CD69|CHML|HIST1H1C|HIST1H2AC|IDH3A|IL10RA|LPIN2|MAPKAPK2|MINA|NIPA2|PARP15|PDE4B|PPIB|PTPRJ|SUB1|TGIF1|EXCLUDED_GENES:|SH3BP5
Human Immune_Kong10_5640genes_ImmPort_ComprehensiveListofImmune-RelatedGenes (20460173-ImmPortComprehensiveListofImmune-RelatedGenes)	GeneSigDB	110	4000	66.9148	7.42555	2.75	1	5.80229	3.90975e-08	4.31853e-06	++	ADRB2|AEN|AICDA|ANXA11|AP3B1|ARHGAP17|ARHGEF3|ARNT2|AVEN|B4GALT1|BCL2|BCL2L10|BCL3|BMPR2|BTLA|C16ORF5|CARD11|CASP10|CCL18|CCL22|CCR10|CCR7|CD200|CD37|CD44|CD47|CD69|CFLAR|CLINT1|CNTNAP1|CSDA|DLEU1|DOCK10|EHD1|EPS15L1|ERN1|FAIM3|FASTKD1|FGD2|FKBP11|FNBP1L|FNDC3A|GAB2|GCLC|GLO1|GPR183|HCK|HIVEP1|HSP90B1|IGHM|IGSF3|IKZF1|IL10|IL10RA|IL12A|IL17RB|IL2RA|IRF2BP2|ITGAE|KIF13B|KLHL21|LAG3|LEPROTL1|LILRA2…
DACOSTA_UV_RESPONSE_VIA_ERCC3_DN	MSigDB_C2	38	851	14.2337	3.67925	4.46533	1	6.45953	4.60155e-08	5.03767e-06	**/++	ABCE1|AP3B1|ARNT2|ATP13A3|CDYL|CHD1|CLINT1|CREB3L2|DUSP5|ELL2|FNBP1L|FNDC3A|HIVEP1|KIF14|LYN|OXSR1|PTPN2|RDX|SACS|SIK3|SMARCA2|SMCHD1|SOGA2|SP100|ST3GAL5|STAM|TGFBR2|TGIF1|TLE1|TLE4|TLK1|TNFAIP8|TRAM2|U2SURP|UCK2|UGCG|ZBTB11|ZMYND11|EXCLUDED_GENES:|FUT8|PTPN1
TARTE_PLASMA_CELL_VS_B_LYMPHOCYTE_UP	MSigDB_C2	11	75	1.2553	1.10863	14.6667	1	8.78989	4.70719e-08	5.10812e-06	+*/*+	ALG3|ARID3A|CASP10|CKAP4|ELL2|HSP90B1|MAN1A1|MANF|PPIB|SEC61B|TRAM2|EXCLUDED_GENES:|FUT8|IRF4
Myc_ChIP_PET_2plus	SignatureDB	94	3257	54.4716	6.8235	2.88609	1	5.79298	5.82027e-08	6.26109e-06	++	ADAMTS6|AKIRIN1|AP3B1|ARHGAP24|ARHGEF3|ARID3A|ASPHD2|B4GALT1|BBIP1|BCL2|BCL3|C18ORF25|C1ORF186|C7ORF23|CABLES1|CARD11|CCDC113|CD44|CD47|CDK12|CHD2|CHN2|CKAP4|COCH|CREB3L2|CSDA|DCAF17|DDI2|DOCK10|EHD1|EHHADH|EPS15L1|ERCC6L2|FA2H|FAM129C|FGD2|FKBP11|FNBP1L|GABPB1|GCDH|GNL3|GPD2|GPX7|GRWD1|GTF3A|HCK|HK2|HSP90B1|IGSF3|IKZF1|IL2RA|KIF13B|LEPREL1|LITAF|LPIN2|LRRC33|METTL8|MINA|MSRB1|NFKBID|NOLC1|OAS1|P…
PUJANA_BRCA1_PCC_NETWORK	MSigDB_C2	58	1645	27.5103	5.02635	3.52584	1	6.06598	5.96388e-08	6.36027e-06	++	ABCE1|ANP32A|AP3B1|ATP13A3|ATP1B3|C6ORF123|C7ORF23|CD37|CD47|CHST7|CLINT1|CNBP|CTR9|CYB5B|DLEU1|EBNA1BP2|ERP29|FTSJ1|GPD2|GTF3A|HK2|IGHM|IKZF1|KIF14|MAT2A|MCM2|METTL13|MRPL3|MTDH|NDUFV2|NOLC1|OXSR1|P2RY10|PAK2|PARP3|PCYT1A|PIAS2|PIM2|POLR1C|POLR3G|PTPN2|PTPRJ|RAB30|RAC2|RNF126|RRP9|SEC61B|SMARCC1|SP100|SPIB|ST6GALNAC4|SUB1|TARS|TFRC|TNFAIP8|TYMS|UCK2|ZNF101|EXCLUDED_GENES:|BLNK|IRF4|PTPN1
Rat Hypothalamic_Mansuy10_1931genes (20937356-TableS2)	GeneSigDB	49	1281	21.4214	4.46734	3.82514	1	6.17339	6.34046e-08	6.70409e-06	+*	ABCE1|ADAM8|AEN|AVEN|CCDC86|CD44|CNBP|CSDA|DUSP5|EBNA1BP2|ELL2|FASTKD1|FNBP1L|GNL3|GPD2|HIST1H2BB|IDH3A|IPO4|IVNS1ABP|KCNA3|KLHL21|LEPREL1|LIMD1|MCM2|MINA|MTDH|MTHFD1|NABP1|NOLC1|NT5DC2|PARVB|PCK2|PDLIM1|PKN3|POLR3G|RRP9|SACS|SLC38A2|SMC6|SPATA5|STAM|TARS|TFRC|TOMM70A|TYMS|UCK2|UMPS|XK|ZNF511
V$NFKB_Q6_01	MSigDB_C3	18	231	3.85977	1.93959	7.79221	1	7.29034	7.79334e-08	8.17046e-06	+*	BATF|BCL3|CCR10|CD69|CNTNAP1|CXORF21|ERN1|HIVEP1|IER5|IL12A|IL2RA|NFKBIB|NFKBID|PTPRJ|SEC61A1|SMC6|TGIF1|ZBTB11|EXCLUDED_GENES:|BMF
SCHLOSSER_MYC_TARGETS_REPRESSED_BY_SERUM	MSigDB_C2	15	159	2.66169	1.6135	9.43396	1	7.6469	7.91642e-08	8.22975e-06	+*	ATP13A3|C5ORF30|CNBP|CSDA|CSNK1E|DCTD|HK2|IDH3A|MRPL3|NOLC1|SEC13|SMARCC1|TARS|TOMM70A|ZBTB11
QI_PLASMACYTOMA_UP	MSigDB_C2	19	258	4.31208	2.04935	7.36434	1	7.16711	8.31467e-08	8.57173e-06	++/*+	ANXA11|BATF|BCL2|CARD11|CD37|CD47|EHD1|HCK|IL12A|IL17RB|LAG3|MARCKS|PLAC8|PLCL2|RAC2|SLA|SLC43A3|SP100|SPIB|EXCLUDED_GENES:|PTPN1
Human Breast_Mackay07_1395GenesUpRegulated (17555561-Table2)	GeneSigDB	47	1215	20.3248	4.36247	3.86831	1	6.1147	8.68597e-08	8.88051e-06	++	ADPGK|ARHGAP17|ARHGEF3|BPGM|CCL18|CD47|CD69|CDYL|CFLAR|CHD2|CHN2|COL9A3|CREB3L2|CSDA|DOCK10|EML4|ERCC6L2|FNDC3A|GAB1|IKZF1|IL2RA|IQGAP2|IRF2BP2|KLF8|LPIN2|MAN1A1|MARCKS|MNDA|OXSR1|PAK2|PARP4|PLBD1|PLCL2|PTPRJ|S1PR1|SIK3|SMCHD1|SP100|SP140|SRPRB|ST3GAL5|TCF4|TET2|TLK1|ULK2|WDR11|ZMYND11|EXCLUDED_GENES:|BLNK|ENTPD1|FOXP1|FUT8|PIM1
HADDAD_B_LYMPHOCYTE_PROGENITOR	MSigDB_C2	20	287	4.80069	2.15963	6.96864	1	7.03792	9.40035e-08	9.53211e-06	++	C7ORF23|CD69|DBN1|FAIM3|HIST1H1C|HIST1H2AC|KIAA0226L|LBH|LILRA2|LILRB2|NGLY1|P2RX5|PION|SH2D3C|TCF4|TGIF1|TLE1|TLE4|UGCG|ZNF107|EXCLUDED_GENES:|BLNK|IRF4
HELLER_HDAC_TARGETS_DN	MSigDB_C2	20	288	4.81369	2.16415	6.94444	1	7.01723	9.94879e-08	9.92552e-06	*+/++	ABCE1|AVEN|BCL2|CD44|CELF2|CFLAR|DOCK10|GTF3A|IQGAP2|KIAA0226L|KLHL21|MRPL3|P2RX5|PHACTR2|SLA|SLC33A1|TCF4|TLK1|TYMS|UCK2|EXCLUDED_GENES:|BLNK|CCND2
Tcell_PIind4x_Feske_Fig6	SignatureDB	12	99	1.65724	1.27451	12.1212	1	8.11508	1.01871e-07	1.0082e-05	+*	CD200|CD44|CFLAR|CHD1|DUSP5|ELL2|IL10|MAPKAPK2|MIR155HG|POLR1C|SLA|TFRC|EXCLUDED_GENES:|IRF4
Mouse Lymphoma_Wu08_1813genes (18535662-TableS1a)	GeneSigDB	39	917	15.3346	3.80945	4.253	1	6.21229	1.08671e-07	1.06696e-05	++	AKIRIN1|AP3B1|ATP1B3|ATXN7L1|B4GALT1|CD200|CHN2|CHST2|CLINT1|CREB3L2|EHHADH|FNDC3A|GAB1|HIST1H1C|ITGAE|IVNS1ABP|LEPROTL1|LITAF|LYN|MAT2A|MTDH|NETO2|PCK2|PDCD4|PION|PLAGL1|PPIB|RILPL2|SCAMP2|SEC61A1|SLC43A3|ST3GAL5|STAM|TCF4|TGFBR2|TGIF1|TRAFD1|UBA5|WDFY1|EXCLUDED_GENES:|CCND2|PIM1
Human Lymphoma_Miyazaki08_121genes (18537973-SuppTable1a)	GeneSigDB	10	65	1.08608	1.03239	15.3846	1	8.63428	1.21207e-07	1.18067e-05	+*	CHML|CKAP4|COCH|GPR183|IGHM|NT5DC2|PDLIM1|PLAC8|RAVER2|SLA|EXCLUDED_GENES:|CCND2
Human Viral_Wang04_1482genes (15220918-TableS1a)	GeneSigDB	46	1190	19.9083	4.31464	3.86555	1	6.04725	1.23118e-07	1.18991e-05	++	AP3M2|ARHGAP17|ARHGEF3|BSPRY|CASP10|CD200|CD47|CNPY3|CTR9|CYB5R2|DBN1|FNDC3A|GMFG|GPD2|GTF3A|GYG1|IGSF3|IQGAP2|KLF8|LEPROTL1|LIMD1|LYN|MAPKAPK2|METTL13|MTDH|PAK2|PARVB|PHACTR2|PMM2|PNP|PPIB|RAB7L1|RAP1GDS1|S1PR1|SCAPER|SEC61A1|SLA|SLC19A2|SLC43A3|SP110|SRPRB|TCF4|TGFBR2|TRAM2|UGCG|VOPP1|EXCLUDED_GENES:|SH3BP5
Human Breast_Creighton08_2154genes (18757322-TableS1)	GeneSigDB	60	1770	29.6064	5.20274	3.38983	1	5.84184	1.34838e-07	1.29309e-05	++	ABCE1|ABHD10|AEN|BCL2|C10ORF2|CCDC86|CD44|CFLAR|COL9A3|CTR9|DBN1|DUSP5|EHD1|EHHADH|GAB2|GABPB1|GRWD1|HEATR6|HIST1H1C|HIST1H2AC|IDH3A|IGSF3|IPO4|ITGAE|KCTD5|KLHL21|LITAF|LSG1|MAT2A|MCM2|NETO2|NOC3L|NOLC1|PCK2|PDCD11|PDCD4|PHF16|PION|PLAC8|PMM2|PNP|POLR3G|PTPN2|RAB7L1|RRP9|SACS|SELRC1|SIDT1|SIK3|SLC38A2|SMARCA2|SP100|SP110|TARS|TGIF1|TM2D3|TSEN2|TUBB4A|TYMS|ULK2|EXCLUDED_GENES:|BLNK|SH3BP5
MATSUDA_NATURAL_KILLER_DIFFERENTIATION	MSigDB_C2	26	473	7.91398	2.76368	5.49683	1	6.54418	1.3718e-07	1.30542e-05	++	ABCE1|ARHGAP24|CCR7|CD44|CHST7|CYB5B|EBNA1BP2|FAM46C|FZD6|GRWD1|IPO4|MAN1A1|MCM2|MCOLN2|MPEG1|MTHFD1|PAK1|PLAGL1|PTPRJ|SLAMF7|TARS|TCF4|TESC|TFRC|TLE1|WDFY1
SHAFFER_IRF4_TARGETS_IN_PLASMA_CELL_VS_MATURE_B_LYMPHOCYTE	MSigDB_C2	10	66	1.10333	1.0406	15.1515	1	8.54954	1.40742e-07	1.31903e-05	+*	BSPRY|CFLAR|DUSP5|ELL2|FKBP11|HSP90B1|PIM2|SLAMF7|SUB1|UCK2|EXCLUDED_GENES:|IRF4
IRF4_target_MM_Plasma_cell_gt_B_cell	SignatureDB	10	66	1.10395	1.04163	15.1515	1	8.54048	1.40742e-07	1.31903e-05	+*	BSPRY|CFLAR|DUSP5|ELL2|FKBP11|HSP90B1|PIM2|SLAMF7|SUB1|UCK2|EXCLUDED_GENES:|IRF4
CHEN_METABOLIC_SYNDROM_NETWORK	MSigDB_C2	46	1196	19.9989	4.32495	3.84615	1	6.01189	1.42284e-07	1.32346e-05	++	ADAM8|ADPRH|ARID3A|ARMC7|BATF|C5ORF30|CARD11|CD37|CD44|DNMT3A|DOCK10|DUSP5|GMFG|GPX7|HK2|IER5|IL10RA|IQGAP2|KIAA0226L|LEPREL1|LITAF|LRRC33|LYN|MCOLN2|MOCOS|MPEG1|MTHFD1|OAS1|PECR|PION|PLAC8|PPIB|RAB7L1|RAC2|RILPL2|SLAMF7|SLC27A5|SP100|ST6GALNAC4|STAMBPL1|TGFBR2|TLE4|TNFAIP8|TUBB4A|UCK2|VOPP1|EXCLUDED_GENES:|BLNK|ENTPD1|FOXP1|PTPN1
NFkB_Up_bothOCILy3andLy10	SignatureDB	8	37	0.616953	0.778639	21.6216	1	9.48199	1.44531e-07	1.33432e-05	+*	BATF|CCL22|CCR7|CD44|ELL2|MARCKS|MIR155HG|SMARCA2|EXCLUDED_GENES:|IRF4|PIM1
Human Breast_Nagaraja10_3054genes (20081105-ST-2)	GeneSigDB	74	2390	39.9634	5.95758	3.09623	1	5.71317	1.45804e-07	1.3361e-05	++	ACSM3|ARID3A|ARID3B|ARMC7|ATP13A3|ATP1B3|AVEN|B4GALT1|BCL2|BMPR2|C1ORF186|CARD11|CCDC86|CD200|CD44|CELF2|CFLAR|CNTNAP1|DUSP5|ECI1|ELL2|ERP29|FA2H|FAM100B|FAM46C|HK2|HOOK1|IL17RB|IPO4|IVNS1ABP|KIF13B|LEPROTL1|LITAF|LMAN1|MAN1A1|MARCH3|MARCKS|MCM2|MEX3C|MLKL|MSRB1|NETO2|NOLC1|PCK2|PEBP1|PECR|PHACTR1|PKN3|PNP|PPIB|PTPLA|PTPN2|RAC2|RAP1GDS1|RAVER2|RILPL2|RRP9|S1PR1|SACS|SIK3|SLC38A2|SMARCA2|SOGA2|SP1…
ONKEN_UVEAL_MELANOMA_UP	MSigDB_C2	35	781	13.0626	3.52285	4.48143	1	6.22717	1.47191e-07	1.3389e-05	++/++	ANXA11|C16ORF88|CELF2|CLINT1|ENOSF1|FASTKD1|FKBP11|GNPTAB|GTF3A|HK2|IER5|KIF14|LYN|MEX3C|MTDH|NEK3|NETO2|NIPA2|PDLIM1|PHACTR1|PMM2|PTPLA|PTPN2|RAP1GDS1|RDX|SACS|SMCHD1|SOGA2|SP110|STAM|TNFAIP8|TOR1AIP1|TYMS|UBE2W|VOPP1|EXCLUDED_GENES:|CCND2
MODULE_84	MSigDB_C4	28	541	9.05094	2.94762	5.1756	1	6.4286	1.56157e-07	1.41009e-05	++	CCL18|CD37|CD69|CELF2|GMFG|HCK|IGHM|IKZF1|IL10RA|KIAA0226L|LILRA2|LILRA4|LILRB2|LYN|MNDA|PDE4B|PIM2|PLAC8|PLBD1|RAC2|RNASE6|SLA|SPIB|ST3GAL5|ST6GALNAC4|TGFBR2|TNFAIP8|TNFRSF13B|EXCLUDED_GENES:|CCND2
Quiescence_heme_all	SignatureDB	19	269	4.50049	2.09134	7.0632	1	6.93312	1.59894e-07	1.43337e-05	+*	ADAM8|ADPGK|CD44|GMFG|GTF3A|IL10RA|KLHL21|NFKBIZ|PDE4B|PLCL2|PRKCB|RAC2|SLA|SP110|TET2|TGFBR2|TLE4|TNFAIP8|TOR1AIP1|EXCLUDED_GENES:|SH3BP5
Human Breast_Mutarelli08_1488genes (18387200-Genes)	GeneSigDB	46	1203	20.1244	4.33962	3.82377	1	5.96264	1.6819e-07	1.49689e-05	++	ABCE1|ARNT2|BATF|BCL2|C10ORF2|CCDC86|CTR9|DUSP5|ECI1|EHD1|FAM100B|FAM46C|GAB2|GABPB1|HIST1H1C|HIST1H2AC|HPDL|IL17RB|IPO4|ITGAE|KIF14|MANF|MAT2A|MCM2|MOCOS|NETO2|NOC3L|NOLC1|PDCD11|PHACTR2|PMM2|PNP|POLR1C|SELRC1|SLC27A5|SLC38A2|SRPRB|TFRC|TGIF1|TLE1|TRAFD1|TRAM2|TYMS|UCK2|UGCG|VOPP1|EXCLUDED_GENES:|FUT8
RUTELLA_RESPONSE_TO_HGF_UP	MSigDB_C2	24	416	6.9531	2.59074	5.76923	1	6.57993	1.73898e-07	1.53664e-05	++/++	ATP13A3|ATP1B3|C6ORF106|CCL18|CCL22|CCR7|CD47|CFLAR|DUSP5|FASTKD1|GPD2|HK2|IL10|LITAF|MARCKS|NETO2|PCK2|RDX|SCAMP2|SLAMF7|SLC43A3|TCEB3|TFRC|TNFAIP8|EXCLUDED_GENES:|ENTPD1|IRF4
RUTELLA_RESPONSE_TO_HGF_VS_CSF2RB_AND_IL4_DN	MSigDB_C2	18	244	4.08196	1.99148	7.37705	1	6.98878	1.77748e-07	1.54854e-05	++/++	ADAM8|ANP32A|ATP1B3|CCL22|CCR7|CELF2|CFLAR|CSNK1E|DUSP5|IER5|LITAF|MARCKS|NEK3|NETO2|PLAC8|RNF138|SMARCC1|TNFAIP8|EXCLUDED_GENES:|IRF4
WEI_MYCN_TARGETS_WITH_E_BOX	MSigDB_C2	35	787	13.1714	3.54505	4.44727	1	6.1575	1.76606e-07	1.54854e-05	+*	ABCE1|ADPGK|ATP13A3|BCL3|CHML|CHN2|CKAP4|DUSP5|EIF4G1|GPD2|HK2|LEPROTL1|LSG1|LYN|MANF|MLKL|MTDH|NETO2|NFKBIB|NOLC1|PHF16|PMM2|PNP|RNF126|RNF138|RRP9|SMC6|SRPRB|STAMBPL1|TCEB3|TFRC|TRAFD1|UCK2|UMPS|ZNF511|EXCLUDED_GENES:|CCND2
Human Breast_Charafe-Jauffret06_1233genes (16288205-GeneTable2)	GeneSigDB	36	825	13.8002	3.62208	4.36364	1	6.12901	1.85479e-07	1.60459e-05	++	ADRB2|AFF3|ATP1B3|BCL2|C9ORF91|CACNA1D|CD44|CFLAR|CHN2|CSDA|DCTD|DHRS13|ELL2|FAM46C|FZD6|GAB2|HK2|LEPREL1|LYN|NABP1|PCK2|PTPN2|RAC2|SIDT1|SMARCC1|SMCHD1|SP100|STAMBPL1|STAT3|TGFBR2|TLE4|TNFAIP8|TOMM70A|TOX2|UBE2E3|ZMYND11|EXCLUDED_GENES:|BLNK
DACOSTA_UV_RESPONSE_VIA_ERCC3_COMMON_DN	MSigDB_C2	26	481	8.04165	2.78399	5.40541	1	6.45059	1.89958e-07	1.63192e-05	**/++	ATP13A3|CDYL|CHD1|CREB3L2|FNBP1L|FNDC3A|HIVEP1|KIF14|LYN|OXSR1|PMM2|PTPN2|SIK3|SMARCA2|SMCHD1|SOGA2|STAM|TGFBR2|TLE1|TLE4|TLK1|TRAM2|U2SURP|UCK2|UGCG|ZMYND11|EXCLUDED_GENES:|FUT8
Human Leukemia_Juric07_617genes (17312329-SuppTable2)	GeneSigDB	25	451	7.54648	2.69799	5.54324	1	6.46907	2.04684e-07	1.74631e-05	++	ADAMTS6|AFF3|ARHGAP24|B4GALT1|BPGM|CD200|CHN2|EBNA1BP2|ERN1|FAM46C|FECH|FZD6|GAB1|IL2RA|KLF8|LIMD1|MAN1A1|MLKL|PLEKHG1|PTPLA|SIK3|SUSD1|TLE4|TOX2|TRAM2|EXCLUDED_GENES:|BLNK|ETV6|FOXP1|SH3BP5
BOSCO_ALLERGEN_INDUCED_TH2_ASSOCIATED_MODULE	MSigDB_C2	14	148	2.47615	1.55695	9.45946	1	7.40154	2.07616e-07	1.75919e-05	++	BATF|BCL2|CCL22|CD69|DUSP5|ELL2|IKZF1|IL17RB|IL2RA|MIR155HG|NABP1|NFKBIZ|RAB30|TRAFD1|EXCLUDED_GENES:|IRF4
SPIELMAN_LYMPHOBLAST_EUROPEAN_VS_ASIAN_DN	MSigDB_C2	29	583	9.75117	3.05635	4.97427	1	6.29798	2.14536e-07	1.80546e-05	**/+*	AICDA|ANP32A|ANXA11|AP3B1|CDYL|CFLAR|CKAP4|COPB2|DLEU1|DUSP5|IL10RA|LMAN1|MARCKS|MCM2|METTL13|NOLC1|OXSR1|PARP4|PCYT1A|PDE4B|PNP|RAC2|RNASE6|SLAMF7|SLC38A2|STAT3|TCEB3|TNFAIP8|TRAM2|EXCLUDED_GENES:|PTPN1
MCLACHLAN_DENTAL_CARIES_UP	MSigDB_C2	18	248	4.14742	2.00826	7.25806	1	6.89781	2.26496e-07	1.89323e-05	+*/+*	BCL3|CCL18|CD37|CD44|FAM46C|FKBP11|HCK|IGHM|IL10RA|LYN|MNDA|PIM2|PLAC8|RAB7L1|RAC2|RNASE6|SLA|TNFAIP8|EXCLUDED_GENES:|BLNK|IRF4
Quiescence_heme_cluster1	SignatureDB	14	150	2.50973	1.5651	9.33333	1	7.34157	2.45206e-07	2.03586e-05	+*	ADAM8|ADPGK|CD44|GMFG|IL10RA|PDE4B|PRKCB|RAC2|SLA|SP110|TGFBR2|TLE4|TNFAIP8|TOR1AIP1|EXCLUDED_GENES:|SH3BP5
SENESE_HDAC1_TARGETS_UP	MSigDB_C2	25	456	7.62309	2.70631	5.48246	1	6.42089	2.51684e-07	2.07572e-05	++/*+	ADAMTS6|ATP13A3|CD44|CDKL1|CYB5R2|DOCK10|DUSP5|EIF4G1|KLHL21|LMAN1|MEX3C|MLKL|NABP1|NFKBIZ|PHACTR2|PNP|RAC2|SEC61A1|SLAMF7|SLC43A3|ST6GALNAC4|TFRC|TGFBR2|TOR1AIP1|WDR6|EXCLUDED_GENES:|CCND2
BIOPOLYMER_METABOLIC_PROCESS	MSigDB_C5	57	1675	28.0153	5.06942	3.40299	1	5.71755	2.55377e-07	2.09223e-05	+*	ABCE1|ADPRH|CD37|CDK12|CDKL1|CHD1|CHD2|CHST7|CNBP|CSDA|CSNK1E|DNMT3A|DUSP5|ELL2|ERN1|GMFG|GTF3A|HCK|IL12A|IVNS1ABP|LIMD1|LITAF|LYN|MAPKAPK2|MCM2|NOLC1|OXSR1|PAK1|PAK2|PARP3|PARP4|PIM2|PKN3|PLAGL1|PLK3|PNP|POLR1C|POLR3G|PRKCB|PTPLA|PTPN2|PTPRJ|RNASE6|RRP9|SIK3|SMARCA2|SMARCC1|SP100|SPIB|STAT3|SUB1|TCEB3|TCF4|TGIF1|TLK1|ZBTB32|ZMYND11|EXCLUDED_GENES:|CCND2|FUT8|PIM1
Leucine_starve_DN	SignatureDB	15	177	2.96174	1.70105	8.47458	1	7.07696	3.23297e-07	2.63125e-05	*+/+*	COPB2|EIF4G1|GCDH|GLO1|HSP90B1|MANF|MRPL3|MTHFD1|PDCD4|PPIB|RNF126|SEC61B|TFRC|TUBB4A|UMPS
Human Breast_Sotiriou03_606genes_ER (12917485-Table6)	GeneSigDB	25	463	7.7453	2.73356	5.39957	1	6.31217	3.34369e-07	2.70358e-05	++	ATP1B3|BCL2|CASP10|CCL18|CD37|CFLAR|COCH|COL9A3|DCTD|DLEU1|DUSP5|HCK|ITGAE|KIAA0226L|LYN|MRPL3|OAS1|PAK1|PDCD4|PNP|PRKCB|SLA|TRAFD1|UCK2|ZMYND11|EXCLUDED_GENES:|FUT8
Human Zola07_426genes_CellDifferentiationMarkers (17174972-TableS1)	GeneSigDB	21	342	5.71496	2.35193	6.14035	1	6.49894	3.74366e-07	3.00732e-05	+*	ADAM8|ATP1B3|BTLA|CCR7|CD200|CD37|CD44|CD47|CD69|IL10RA|IL2RA|ITGAE|LAG3|LILRA2|LILRA3|LILRA4|LILRB2|PTPRJ|SLAMF7|TFRC|TNFRSF13B|EXCLUDED_GENES:|ENTPD1
BERTUCCI_MEDULLARY_VS_DUCTAL_BREAST_CANCER_UP	MSigDB_C2	16	204	3.41095	1.82483	7.84314	1	6.89876	3.77169e-07	3.0103e-05	+*/*+	ADAM8|ASPHD2|CASP10|CSDA|GABPB1|GRWD1|GYG1|LAG3|MIR155HG|NOC3L|PARVB|PIM2|PLCL2|RILPL2|STAMBPL1|TRAFD1|EXCLUDED_GENES:|ETV6
Human Viral_Feuerhake05_47genes (15870177-FigureS4)	GeneSigDB	7	29	0.484832	0.689091	24.1379	1	9.45473	3.95335e-07	3.13506e-05	+*	CCL22|CCR7|CD44|CD69|CFLAR|IL2RA|LITAF|EXCLUDED_GENES:|CCND2
Human Immune_Kong10_855genes_ImmPort_CD40LvsControl (20460173-ImmPortCD40LvsControl)	GeneSigDB	27	533	8.91774	2.93211	5.06567	1	6.16699	3.98068e-07	3.13663e-05	++	BATF|BCL2|C18ORF25|CCL22|CCR7|CFLAR|EHD1|FAIM3|GPD2|GPR183|IQGAP2|KIF13B|LILRA4|LITAF|LPCAT4|MAP3K5|MAPKAPK2|MARCKS|NFKBIB|OAS1|PLK3|PRKCB|RAB7L1|SMARCA2|SP140|TYMS|VOPP1|EXCLUDED_GENES:|FUT8|PIM1|SH3BP5
Myc_ChIP_PET_Expr_DN	SignatureDB	18	258	4.31534	2.04488	6.97674	1	6.69217	4.06269e-07	3.18098e-05	+*/++	ASPHD2|B4GALT1|BCL2|BCL3|CD44|CD47|DOCK10|EHD1|FA2H|FGD2|HCK|IKZF1|NFKBID|OAS1|SLA|ST3GAL5|STAT3|UGCG|EXCLUDED_GENES:|ENTPD1|ETV6
Human StemCell_Matushansky08_886genes (18310505-TableS1)	GeneSigDB	32	708	11.8418	3.36593	4.51977	1	5.9889	4.26196e-07	3.31602e-05	++	ABHD10|ANKRD12|AP3M2|C16ORF88|CD47|CFLAR|CSDA|CTR9|CXORF21|DOCK10|EPM2AIP1|ERP29|GCLC|GPX7|KCTD5|MANF|MARCKS|MAT2A|MCM2|NOC3L|PDCD11|PDCD4|PECR|PNP|RDX|SMARCC1|ST6GALNAC4|STAT3|TLK1|TYMS|WDR6|ZNF107|EXCLUDED_GENES:|BLNK|CCND2
Mouse StemCell_Lawlor06_2532genes (16651409-SuppTable2)	GeneSigDB	64	2016	33.7264	5.5245	3.1746	1	5.47989	5.02279e-07	3.88356e-05	++	ADPGK|AKIRIN1|ALG3|ANP32A|ANXA11|ARID3A|B9D1|CD200|CD47|CELF2|CHD1|CNBP|COPB2|CSNK1E|CYB5B|DBN1|DNMT3A|EBNA1BP2|ELL2|FKBP11|FNDC3A|GABPB1|GCLC|GMFG|GMPPB|GRWD1|HCK|HIVEP1|HSP90B1|IVNS1ABP|KLHL21|LPIN2|MANF|MARCKS|MCM2|MCOLN2|MINA|NABP1|NDUFV2|NT5DC2|PCK2|PDLIM1|PEBP1|PIAS2|PIM2|POLR1C|PPIB|SCAMP2|SEC61A1|SEC61B|SLC38A2|SPATA5|SRPRB|ST6GALNAC4|STAM|TARS|TBL1XR1|TOMM70A|TRAFD1|TYMS|UBA5|UBE2E3|UCK2…
Human Breast_Bertucci06_2537genes (16651414-Supp2)	GeneSigDB	55	1628	27.2218	5.00457	3.37838	1	5.55057	5.34698e-07	4.10854e-05	++	ADPGK|AFF3|C11ORF80|CCL18|CD37|CDK12|CELF2|DHRS13|EML4|FAM46C|FGD2|GAB2|GNL3|GNPTAB|GPM6A|HCK|IGHM|IKZF1|IL10RA|KIAA0226L|MCM2|MCOLN2|MLKL|MNDA|MPEG1|MSRB1|MTDH|NOLC1|OAS1|P2RY10|PAK1|PIM2|PLAC8|PRKCB|PTPN2|RAC2|RNASE6|SIDT1|SLA|SLAMF7|SLC19A2|SMARCC1|SP100|SP110|SP140|SPIB|STAMBPL1|STAT3|SUB1|TFRC|TGFBR2|TM2D3|TNFAIP8|TYMS|WDFY1|EXCLUDED_GENES:|ETV6|FOXP1|FUT8|IL16|IRF4
MODULE_119	MSigDB_C4	13	138	2.3058	1.50134	9.42029	1	7.12311	5.92418e-07	4.52395e-05	++	ADAM8|CD200|DNMT3A|EML4|FASTKD1|IL10RA|KCNA3|P2RY10|PIM2|PLCL2|S1PR1|SP110|SPIB|EXCLUDED_GENES:|FOXP1|IL16|IRF4
PENG_LEUCINE_DEPRIVATION_DN	MSigDB_C2	15	187	3.12747	1.74788	8.02139	1	6.79254	6.55192e-07	4.97263e-05	*+/+-	COPB2|EIF4G1|GCDH|GLO1|HSP90B1|MANF|MRPL3|MTHFD1|PNP|PPIB|RNF126|SEC61B|TFRC|TUBB4A|UMPS
Human Leukemia_Li07_22genes (17313671-SuppTable1b)	GeneSigDB	6	20	0.334445	0.572559	30	1	9.89515	6.70954e-07	5.06121e-05	+*	CD37|IGHM|IKZF1|IL10RA|SPIB|STAM|EXCLUDED_GENES:|BLNK
PASQUALUCCI_LYMPHOMA_BY_GC_STAGE_DN	MSigDB_C2	14	163	2.7263	1.63115	8.58896	1	6.91151	6.78945e-07	5.09044e-05	+*/++	AFF3|ATXN7L1|C7ORF23|CCDC50|CCR7|CD37|CELF2|CHD1|CHST7|FAM129C|GMFG|PDLIM1|PRKCB|ZADH2|EXCLUDED_GENES:|SH3BP5
Human Leukemia_Calln08_1020genes (18362358-Table7)	GeneSigDB	30	652	10.9018	3.23106	4.60123	1	5.91083	6.83933e-07	5.09695e-05	++	ABCE1|C18ORF25|C9ORF91|CDYL|CHN2|CLINT1|CSDA|ELL2|FNBP1L|GABPB1|GCLC|HSP90B1|IDH3A|LEPROTL1|LMAN1|MAN1A1|MEX3C|NEK3|OXSR1|SLC19A2|SLC25A30|SNX18|TLE4|UGCG|ULK2|UMPS|USP46|XK|ZBTB11|ZNF586|EXCLUDED_GENES:|FOXP1|SH3BP5
HIRSCH_CELLULAR_TRANSFORMATION_SIGNATURE_UP	MSigDB_C2	17	240	4.01556	1.97671	7.08333	1	6.56871	6.90343e-07	5.11391e-05	++/*+	BCL3|CSDA|CYB5R2|IVNS1ABP|MAP3K5|MOCOS|PDE4B|PNP|PTPN2|RAB7L1|S1PR1|SLC33A1|STAM|STAT3|TGIF1|TNFAIP8|UGCG|EXCLUDED_GENES:|FUT8
IL10_OCILy3_Up	SignatureDB	12	118	1.9735	1.39053	10.1695	1	7.21056	7.06807e-07	5.2047e-05	+*	ACPP|BATF|BCL3|GPR183|GTF3A|IL10|IL2RA|MIR155HG|MNDA|PRKCB|PTPN2|STAT3|EXCLUDED_GENES:|BMF|FUT8|PTPN1
Human Embryo_Heim07_1650genes (17880687-TableS1)	GeneSigDB	43	1146	19.1626	4.24153	3.75218	1	5.62	7.23638e-07	5.29712e-05	++	AFF3|ANP32A|ANXA11|AP3B1|B4GALT1|BMPR2|CD200|CD44|CHN2|CNPY3|COL9A3|DUSP5|ELL2|EML4|FNBP1L|GPD2|HK2|HSP90B1|KLF8|LEPREL1|LIMD1|LITAF|MAPKAPK2|PDLIM1|PHACTR2|PHF16|PION|PLAGL1|POLR3G|SLC43A3|TBL1XR1|TFRC|TGIF1|TLE1|TOX2|TSHZ1|UBE2W|UGCG|WDFY1|ZADH2|ZNF101|ZNF614|ZSCAN2|EXCLUDED_GENES:|BLNK|BMF|ETV6|FOXP1
CHARAFE_BREAST_CANCER_LUMINAL_VS_BASAL_DN	MSigDB_C2	24	452	7.56345	2.70014	5.30973	1	6.08729	7.76329e-07	5.64939e-05	**/++	ADRB2|ATP1B3|CD44|CFLAR|CSDA|DCTD|ELL2|FZD6|LBH|LEPREL1|LYN|NABP1|PARP4|PTPN2|RAC2|SMCHD1|SP100|STAMBPL1|STAT3|TGFBR2|TLE4|TNFAIP8|TOX2|UBE2E3
Human Colon_Daoud03_167genes (12782583-Table3)	GeneSigDB	13	142	2.376	1.52401	9.15493	1	6.97106	8.22493e-07	5.91573e-05	+*	ADRB2|BCL3|CD200|CFLAR|CHD1|COCH|CYB5B|DUSP5|GNL3|MAT2A|PDE4B|PLK3|PNP
MCLACHLAN_DENTAL_CARIES_DN	MSigDB_C2	17	243	4.06333	1.98784	6.99588	1	6.50789	8.20638e-07	5.91573e-05	+*/+*	BCL3|CCL18|CD37|CD44|FKBP11|GPM6A|HCK|IGHM|LYN|MNDA|PIM2|PLAC8|RAB7L1|RAC2|RNASE6|SLA|TNFAIP8|EXCLUDED_GENES:|BLNK
Mouse StemCell_Lindmark04_2514genes (15474998-tableS1c)	GeneSigDB	62	1958	32.7485	5.44427	3.1665	1	5.3729	8.49039e-07	6.07137e-05	++	ADAM8|ADPGK|ANP32A|ATP13A3|ATP1B3|BATF|CCDC50|CD37|CD44|CD47|CHD1|CKAP4|CNBP|CSDA|CYB5B|ECI1|EIF4G1|ELL2|ERP29|GAB2|GTF3A|HIST1H1C|HK2|HSP90B1|IDH3A|IL12A|IPO4|ITGAE|IVNS1ABP|LITAF|LMAN1|MANF|MAPKAPK2|MARCKS|MAT2A|MCM2|MPEG1|MSRB1|NDUFV2|NT5DC2|PARL|PCK2|PDLIM1|PIAS2|PLAC8|POLR1C|PRKCB|RAC2|RDX|SEC61A1|SEC61B|SFTPB|SLC38A2|SMARCC1|ST3GAL5|TARS|TCEB3|TCF4|TFRC|TM2D3|TYMS|ZMYND11|EXCLUDED_GENES:|BL…
ONKEN_UVEAL_MELANOMA_DN	MSigDB_C2	26	522	8.73497	2.89719	4.98084	1	5.95923	8.98909e-07	6.39104e-05	++/++	ADRB2|ATP13A3|C10ORF2|CD200|CD44|CNBP|EIF4G1|ERP29|FZD6|HIST1H1C|HIST1H2AC|KLHL21|LSG1|MARCKS|MCM2|MINA|NT5DC2|PARL|PDCD4|PDE4B|SMARCC1|TBL1XR1|TOMM70A|TUBB4A|UMPS|USP46|EXCLUDED_GENES:|ENTPD1
Mouse InnerEar_Sajan08_2230genes (17660535-TableS4b)	GeneSigDB	62	1962	32.8106	5.45213	3.16004	1	5.35375	9.08984e-07	6.42574e-05	++	ADPRH|ALG3|ANP32A|ANXA11|ARID3A|CD47|CDYL|CHST2|COL9A3|CREB3L2|CSDA|DBN1|DNMT3A|EIF4G1|ELOVL7|ERP29|FGD2|FNDC3A|FZD6|GAB2|GLO1|GRWD1|GTF3A|IDH3A|IER5|KLHL21|LMAN1|LPIN2|MAPKAPK2|MARCKS|MAT2A|MRPL3|MTDH|NFKBIB|NIPA2|NOLC1|PAK1|PDE4B|PDLIM1|PHACTR1|PIAS2|PPIB|RAB7L1|RAP1GDS1|RASGRF1|SEC61A1|SLC38A2|SMARCA2|SNX18|SRPRB|ST3GAL5|STAM|TCF4|TLE1|TMEM39A|TOMM70A|TSHZ1|TUBB4A|UBE2E3|UCK2|ZADH2|ZMYND11|EXC…
HUTTMANN_B_CLL_POOR_SURVIVAL_UP	MSigDB_C2	18	273	4.56827	2.10573	6.59341	1	6.37864	9.2508e-07	6.50237e-05	+*/*+	ADAMTS6|CASP10|DUSP5|ENOSF1|FA2H|HIST1H2AC|IGSF3|IL17RB|LAG3|LILRB2|MAPKAPK2|PAK1|PARVB|PIM2|PNP|SFTPB|ST6GALNAC4|TLE1|EXCLUDED_GENES:|IL16
MEK_UP.V1_DN	MSigDB_C6	15	193	3.22342	1.77377	7.77202	1	6.63931	9.78635e-07	6.72594e-05	*+/++	BCL2|COL9A3|FASTKD1|HIST1H1C|HIST1H2AC|MOCOS|NGLY1|OAS1|PDCD4|PLBD1|RAB7L1|SOGA2|SP100|SP110|ZNF107|EXCLUDED_GENES:|BLNK
ZHENG_FOXP3_TARGETS_IN_THYMUS_UP	MSigDB_C2	15	193	3.22518	1.77488	7.77202	1	6.63416	9.78635e-07	6.72594e-05	++/*+	ANKRD12|ARHGEF3|CD69|CELF2|DOCK10|GPR183|MAN1A1|MAP3K5|NFKBIZ|P2RY10|PARL|PDE4B|SIK3|SLA|VOPP1|EXCLUDED_GENES:|IRF4
PROTEIN_AMINO_ACID_PHOSPHORYLATION	MSigDB_C5	18	274	4.58449	2.11169	6.56934	1	6.35297	9.75163e-07	6.72594e-05	++	CDK12|CDKL1|CSNK1E|ERN1|GMFG|HCK|IL12A|LYN|MAPKAPK2|OXSR1|PAK1|PAK2|PIM2|PKN3|PLK3|PRKCB|SIK3|TLK1|EXCLUDED_GENES:|CCND2|PIM1
NUCLEOBASENUCLEOSIDENUCLEOTIDE_AND_NUCLEIC_ACID_METABOLIC_PROCESS	MSigDB_C5	45	1240	20.7374	4.40339	3.62903	1	5.50998	9.72913e-07	6.72594e-05	+*	ABCE1|ARNT2|BCL3|CARD11|CHD1|CHD2|CNBP|CSDA|CSNK1E|DCTD|DNMT3A|ELL2|GCLC|GTF3A|IVNS1ABP|LIMD1|LITAF|MCM2|NFKBIB|NOLC1|OAS1|PARP3|PDCD4|PLAGL1|PMM2|PNP|POLR1C|POLR3G|RNASE6|RRP9|SMARCA2|SMARCC1|SP100|SPIB|STAT3|SUB1|TCEB3|TCF4|TGIF1|TLE1|TLK1|TYMS|UMPS|ZBTB32|ZMYND11|EXCLUDED_GENES:|IRF4
SHAFFER_IRF4_TARGETS_IN_MYELOMA_VS_MATURE_B_LYMPHOCYTE	MSigDB_C2	11	101	1.68746	1.28525	10.8911	1	7.24568	1.03541e-06	7.07684e-05	+*	BSPRY|CFLAR|DUSP5|FKBP11|HSP90B1|PIM2|PNP|SLAMF7|SLC38A2|SUB1|UCK2
MODULE_17	MSigDB_C4	21	365	6.10716	2.43389	5.75342	1	6.11894	1.07603e-06	7.31403e-05	+*	ARID3A|CELF2|CYB5B|ECI1|HIST1H1C|HIST1H2AC|KIF14|MCM2|MRPL3|MTHFD1|NOLC1|PIM2|PNP|PRKCB|RAC2|RRP9|SEC13|TFRC|TYMS|UCK2|UGCG|EXCLUDED_GENES:|PIM1
PASQUALUCCI_LYMPHOMA_BY_GC_STAGE_UP	MSigDB_C2	18	278	4.64963	2.12675	6.47482	1	6.27736	1.20107e-06	8.11936e-05	+*/++	CD44|CKAP4|CREB3L2|ELL2|FAM46C|FKBP11|FNDC3A|GPM6A|HSP90B1|LEPROTL1|LMAN1|LPIN2|MANF|MTDH|PECR|SEC61A1|SRPRB|UCK2|EXCLUDED_GENES:|BLNK|CCND2|ENTPD1|IRF4
Human Leukemia_Sasaki05_192genes (15471956-Table2)	GeneSigDB	14	171	2.85762	1.67018	8.18713	1	6.67135	1.20963e-06	8.1328e-05	++	ARNT2|BATF|CD47|FZD6|IL2RA|KIF14|LPCAT4|PARP3|PPIB|PTPRJ|SMARCA2|TFRC|TRAFD1|TYMS|EXCLUDED_GENES:|IRF4
JAK_Up_HBL1	SignatureDB	20	339	5.67136	2.3463	5.89971	1	6.10691	1.32077e-06	8.83204e-05	+*	BATF|BCL3|CCDC86|ERCC6L2|GNPTAB|IL10|IL12A|IRF2BP2|LIMD1|MOCOS|MTDH|PCK2|SLC2A13|SLC38A2|SMARCC1|STAT3|TFRC|TLK1|TMEM184B|TOX2|EXCLUDED_GENES:|IRF4
Human StemCell_Cui05_113genes (16269079-TableS4)	GeneSigDB	11	104	1.7381	1.30466	10.5769	1	7.0991	1.38936e-06	9.24075e-05	++	ADRB2|CD44|CLINT1|GPR183|IQGAP2|MARCKS|MNDA|NOLC1|PDE4B|TCF4|UMPS|EXCLUDED_GENES:|PIM1
Human InVitro_Bild06_348genes (16273092-TableS1c)	GeneSigDB	17	253	4.22999	2.02955	6.71937	1	6.29204	1.43193e-06	9.3727e-05	++	ADAM8|ADRB2|B4GALT1|C19ORF10|CSNK1E|DUSP5|EHD1|ELOVL7|HIST1H2AC|HK2|LYN|NFKBIZ|NOLC1|OXSR1|RRP9|SOGA2|TOR1AIP1|EXCLUDED_GENES:|PIM1
FOSTER_TOLERANT_MACROPHAGE_DN	MSigDB_C2	22	403	6.74654	2.55657	5.45906	1	5.96638	1.4267e-06	9.3727e-05	+*/++	ARHGEF3|BCL3|C5ORF30|C6ORF106|C7ORF23|CCL22|CD69|CHD1|DUSP5|FNDC3A|IKZF1|IL10|NFKBID|NFKBIZ|PDE4B|PLAGL1|PTPRJ|ST6GALNAC4|STAT3|TCF4|TET2|ZBTB32|EXCLUDED_GENES:|CCND2|ETV6|FOXP1|PIM1
MARSON_BOUND_BY_FOXP3_STIMULATED	MSigDB_C2	39	1016	16.9864	4.00387	3.83858	1	5.49807	1.41792e-06	9.3727e-05	++	AKIRIN1|BSPRY|CCDC113|CD47|CHD1|EML4|EPM2AIP1|ERN1|FAM100B|GABPB1|GLO1|GMFG|GPD2|HIST1H2AC|HSP90B1|IL10RA|IL2RA|KCNA3|LEPROTL1|MAP3K5|METTL13|MINA|NABP1|NDUFV2|NFKBID|P2RY10|PION|PTPRJ|SELRC1|SMARCC1|STAT3|TBL1XR1|TCEB3|TGIF1|TOR1AIP1|TSHZ1|UBE2W|WDR6|ZADH2|EXCLUDED_GENES:|PIM1
CUI_TCF21_TARGETS_2_DN	MSigDB_C2	34	826	13.8073	3.61841	4.11622	1	5.58055	1.52835e-06	9.95115e-05	*+/++	AKIRIN1|ARHGAP17|ARHGAP24|ATXN7L1|CABLES1|CD47|CDYL|CELF2|CFLAR|ELL2|EPHB1|FNDC3A|GAB2|GPD2|GYG1|HIST1H1C|HIVEP1|IQGAP2|IRF2BP2|LEPREL1|LPIN2|LRRC33|MAN1A1|PARP4|PDE4B|PLEKHG1|PTPRJ|SLC33A1|SOGA2|TGFBR2|TLE4|ULK2|USP46|WDFY1|EXCLUDED_GENES:|SH3BP5
SASAKI_ADULT_T_CELL_LEUKEMIA	MSigDB_C2	14	175	2.92615	1.68949	8	1	6.55457	1.59432e-06	0.000103264	++	ARNT2|BATF|CD47|FZD6|IL2RA|KIF14|LPCAT4|PARP3|PPIB|PTPRJ|SMARCA2|TFRC|TRAFD1|TYMS|EXCLUDED_GENES:|IRF4
GRAESSMANN_APOPTOSIS_BY_DOXORUBICIN_DN	MSigDB_C2	57	1775	29.6777	5.199	3.21127	1	5.25531	1.62125e-06	0.000104461	++/++	ABCE1|ACTR8|ALG3|AP3M2|ATP13A3|BCL2|BCL3|C19ORF10|C9ORF91|CCDC50|CD200|CD44|CHD1|CHML|CSDA|CYB5B|DBN1|DDI2|ECI1|ERCC6L2|FAM108C1|FECH|FKBP11|GAB1|IVNS1ABP|MAP3K5|MARCKS|MCM2|MRPL3|MTDH|NEK3|NOLC1|PAK1|PCK2|PIAS2|POLR3G|RAP1GDS1|RDX|RILPL2|RNF138|SELRC1|SMARCA2|SMC6|SNX18|SRPRB|ST3GAL5|STAMBPL1|TARS|TBL1XR1|TCF4|TCTN3|TFRC|TMEM39A|TYMS|UBE2E3|UBE2W|UCK2|EXCLUDED_GENES:|FOXP1|FUT8|SH3BP5
Splenic_Marginal_zone_Bcell_gt_naive_and_GC_Bcell	SignatureDB	6	23	0.385748	0.615487	26.087	1	9.12163	1.67469e-06	0.000107345	+*	CCDC50|DLEU1|HIST1H2AC|LEPROTL1|MARCKS|OAS1
KRIGE_RESPONSE_TO_TOSEDOSTAT_6HR_UP	MSigDB_C2	37	945	15.804	3.86824	3.91534	1	5.47948	1.69209e-06	0.000107902	++/+*	ASPHD2|BCL3|C18ORF25|C9ORF91|CCDC50|CD37|CD69|CHD2|DBN1|DUSP5|FAM100B|FTSJ1|HCK|HIST1H1C|IVNS1ABP|LPIN2|METTL8|MINA|NABP1|NOC3L|NOLC1|PARVB|PCK2|PDCD11|PDCD4|PHACTR2|RNF126|SCAPER|SLC38A2|SLC38A5|SP100|TCF4|TGIF1|TLE4|TRAFD1|UMPS|WDFY1
Human Leukemia_Ge06_105genes (16249385-Table2)	GeneSigDB	10	86	1.43841	1.18598	11.6279	1	7.21902	1.75486e-06	0.00011133	+*	ARHGEF3|BCL2|CD44|DOCK10|FAIM3|HCK|IGHM|KIAA0226L|MNDA|PION
BILD_HRAS_ONCOGENIC_SIGNATURE	MSigDB_C2	17	257	4.30002	2.04701	6.61479	1	6.20417	1.77472e-06	0.000112015	++	ADAM8|ADRB2|B4GALT1|C19ORF10|CSNK1E|DUSP5|EHD1|ELOVL7|HIST1H2AC|HK2|LYN|NFKBIZ|NOLC1|OXSR1|RRP9|SOGA2|TOR1AIP1|EXCLUDED_GENES:|PIM1
MORI_PLASMA_CELL_UP	MSigDB_C2	8	51	0.852782	0.914967	15.6863	1	7.81145	1.94284e-06	0.000122004	+*/**	BPGM|FAM46C|GMPPB|LMAN1|MANF|TESC|TMEM39A|TRAM2
Myc_overexpression_1.5x_UP	SignatureDB	10	87	1.45516	1.19283	11.4943	1	7.1635	1.95356e-06	0.000122058	+*	ALG3|C10ORF2|CCDC86|GNL3|HK2|IPO4|LSG1|NOLC1|PMM2|RRP9
DAZARD_RESPONSE_TO_UV_NHEK_DN	MSigDB_C2	19	318	5.32042	2.27356	5.97484	1	6.01682	2.0166e-06	0.000125363	**/++	ADRB2|ARID3A|ATP13A3|CDYL|CHD1|CREB3L2|ENOSF1|FNBP1L|FNDC3A|GCLC|KIF14|LPCAT4|MAP3K5|SACS|SOGA2|TGFBR2|TLE4|TLK1|TNFAIP8
Human Lymphoma_Chng09_174genes (18974375-TableS5b)	GeneSigDB	12	131	2.18815	1.46391	9.16031	1	6.70251	2.16261e-06	0.000133768	+*	CHST2|ELL2|FKBP11|HSP90B1|LILRA6|MANF|PPIB|SLAMF7|SRPRB|TMEM184B|TRAM2|XK
Human Leukemia_Tavolaro10_56genes (20036005-Table3)	GeneSigDB	8	52	0.870121	0.924399	15.3846	1	7.71299	2.26282e-06	0.00013927	++	BMPR2|CDK12|CDKL1|LYN|NEK3|PIM2|PRKCB|TLK1
JAK_IL10_Ly10_Up	SignatureDB	7	37	0.619248	0.779693	18.9189	1	8.18368	2.32365e-06	0.000142306	+*	BATF|BCL3|GPR183|MIR155HG|MNDA|PTPN2|STAT3|EXCLUDED_GENES:|FUT8
STAT3high_ABC_DLBCL_subgroup	SignatureDB	10	89	1.49118	1.20783	11.236	1	7.04473	2.4104e-06	0.000146892	+*	BCL3|CD44|DUSP5|FTSJ1|GPR183|HCK|IL2RA|MIR155HG|MNDA|STAT3|EXCLUDED_GENES:|FUT8|PTPN1
MODULE_15	MSigDB_C4	20	353	5.90505	2.39218	5.66572	1	5.89208	2.45249e-06	0.000148685	+*	CD37|CD44|CD47|CD69|GMFG|GYG1|HIST1H2AC|IGHM|IQGAP2|LYN|MCM2|MRPL3|NOLC1|PIM2|PLK3|PNP|RAC2|TFRC|TNFAIP8|TYMS|EXCLUDED_GENES:|CCND2|PIM1
Human Breast_Parker09_1232genes_IntrinsicGenes_hu2006 (19204204-SupplementaryTable1)	GeneSigDB	41	1120	18.7358	4.19822	3.66071	1	5.30325	2.46385e-06	0.000148685	+*	ARNT2|BSPRY|C19ORF10|C5ORF30|CHST2|COL9A3|CSDA|DBN1|EIF4G1|ELL2|FA2H|FAM46C|FKBP11|GPX7|GTF3A|HEATR6|HIST1H1C|HIST1H2AC|HIST1H2BB|IQGAP2|LYN|MCM2|MTHFD1|P2RY10|PDCD4|PIM2|PLAC8|RAB30|RDX|SLC19A2|SLC27A5|SMCHD1|SMU1|TARS|TBL1XR1|TFRC|THYN1|TYMS|UBE2E3|WDR6|ZNF614|EXCLUDED_GENES:|FOXP1|IRF4
ENK_UV_RESPONSE_EPIDERMIS_UP	MSigDB_C2	18	293	4.90024	2.18168	6.14334	1	6.00443	2.53502e-06	0.000152236	++/++	ADAM8|ANP32A|BCL3|CD47|CHST2|CYB5R2|EBNA1BP2|GMPPB|HK2|IDH3A|ITGAE|MANF|PIM2|POLR3G|PPIB|SP110|STAT3|TYMS
Human Leukemia_Chiaretti10_405genes (20418243-SuppTable1a)	GeneSigDB	19	324	5.41495	2.29164	5.8642	1	5.92808	2.65247e-06	0.000158521	++	ADAM8|CKAP4|GYG1|IL10RA|IVNS1ABP|LILRA2|LITAF|LYN|MAPKAPK2|MNDA|MSRB1|PLBD1|RILPL2|SLA|SMCHD1|SNX18|SP100|TOR1AIP1|UGCG
Human Leukemia_Chiaretti04_314genes (14684422-TableS1)	GeneSigDB	17	265	4.4332	2.07708	6.41509	1	6.05022	2.69086e-06	0.000160041	++	CD200|CD44|CD69|CSDA|GAB2|GABPB1|HIST1H2AC|IL12A|LYN|PDLIM1|PIM2|PLAGL1|STAM|TLE4|UBE2E3|UGCG|XK|EXCLUDED_GENES:|CCND2
Glutamine_Glucose_starve_both_DN	SignatureDB	22	420	7.02551	2.60491	5.2381	1	5.74856	2.79739e-06	0.000165581	**/++	ATP1B3|CD37|CD47|CFLAR|COPB2|EBNA1BP2|EIF4G1|GCDH|GLO1|HSP90B1|IDH3A|IGHM|MANF|P2RX5|PDLIM1|PPIB|PRKCB|RRP9|TARS|TFRC|UCK2|XK|EXCLUDED_GENES:|PTPN1
Mouse StemCell_Forsberg05_362genes (16151515-TableS3)	GeneSigDB	14	184	3.07598	1.73375	7.6087	1	6.30079	2.88477e-06	0.00016994	++	ARHGEF3|ATP13A3|ATXN7L1|CD69|CHDH|CKAP4|CTR9|IER5|IL10RA|IVNS1ABP|MPEG1|NFKBIZ|PLAC8|SMARCC1|EXCLUDED_GENES:|FOXP1
WALLACE_PROSTATE_CANCER_RACE_UP	MSigDB_C2	18	297	4.96665	2.19598	6.06061	1	5.93509	3.06708e-06	0.000179824	++/**	CCR7|CD37|CD69|CELF2|DOCK10|FAIM3|GMFG|GPM6A|GPR183|IGHM|IL10RA|LILRB2|PIM2|PLAC8|RAC2|RNASE6|SLA|TLE4|EXCLUDED_GENES:|IL16
Human Lymphoma_Sander08_1021genes (18713946-TableS3)	GeneSigDB	28	630	10.5331	3.17682	4.44444	1	5.49823	3.15004e-06	0.000183817	++	AFF3|ARHGAP24|C6ORF106|CCDC50|CD37|CFLAR|CHD2|CHN2|CYB5B|FZD6|HIST1H2AC|IL10RA|KIF14|MPEG1|P2RY10|PDCD4|PLK3|POLR3G|RNASE6|SACS|SIDT1|SLAMF7|SP100|SP110|SPATA5|TOR1AIP1|UBE2W|ZMYND11
MONNIER_POSTRADIATION_TUMOR_ESCAPE_UP	MSigDB_C2	21	391	6.53835	2.51665	5.37084	1	5.74639	3.19324e-06	0.000185463	++/*+	ABCE1|AEN|ANXA11|AVEN|C6ORF106|EIF4G1|FASTKD1|GCLC|GRWD1|IPO4|MAN1A1|MTDH|MTHFD1|NOLC1|PCYT1A|PDCD11|PMM2|RNF183|SMARCC1|SRPRB|TFRC|EXCLUDED_GENES:|BLNK|ETV6
Human Kidney_Sallustio10_2134genes_CompleteListAnalysis (19843711-TableS2)	GeneSigDB	54	1683	28.1381	5.07723	3.20856	1	5.09371	3.22955e-06	0.000186695	++	ACSM3|ACTR8|AKIRIN1|ATP13A3|ATP1B3|B4GALT1|BCL2|C7ORF23|CD44|CD47|CFLAR|CKAP4|CSDA|CTR9|DCTD|DLEU1|DOCK10|DUSP5|EHD1|EHHADH|ELL2|FASTKD1|FNBP1L|FTSJ1|GNPTAB|HK2|HSP90B1|IGSF3|KLHL21|LEPREL1|LITAF|MARCKS|METTL13|MRPL3|MSRB1|MTDH|NDUFV2|PCK2|PDE4B|PHACTR1|PHACTR2|PPIB|PTPN2|RAB7L1|SEC13|SLC38A2|SOGA2|ST3GAL5|TARS|TLE1|TLE4|TOR1AIP1|TRAM2|UGCG|EXCLUDED_GENES:|CCND2|ENTPD1|PTPN1
LU_IL4_SIGNALING	MSigDB_C2	10	92	1.53971	1.22782	10.8696	1	6.89049	3.26923e-06	0.00018811	++	BATF|CD69|CFLAR|EIF4G1|IL2RA|MAP3K5|NFKBIZ|SLA|SMARCA2|SOGA2
HUMMEL_BURKITTS_LYMPHOMA_DN	MSigDB_C2	5	15	0.251536	0.497781	33.3333	1	9.53926	3.34147e-06	0.000190704	*+/+*	BCL3|CD44|CFLAR|PION|STAT3
RODRIGUES_THYROID_CARCINOMA_POORLY_DIFFERENTIATED_UP	MSigDB_C2	28	632	10.5679	3.18261	4.43038	1	5.47728	3.34514e-06	0.000190704	+*/++	ABCE1|ATP1B3|AVEN|BBIP1|GPD2|KCTD5|KIF14|LEPROTL1|MCM2|NABP1|NETO2|NOLC1|PHTF1|PNP|PTPLA|RAP1GDS1|SELRC1|SMC6|STAM|SUB1|TARS|TFRC|TLK1|TOX2|TYMS|U2SURP|UBE2W|UCK2
Mouse StemCell_Ulloa-Montoya07_530genes (17683608-TableS5)	GeneSigDB	23	458	7.65969	2.71696	5.02183	1	5.64613	3.36448e-06	0.000190927	++	ANXA11|ARID3A|ARID3B|CCDC86|CDYL|FAM100B|FKBP11|GMFG|GRWD1|HPDL|KLF8|LSG1|MTHFD1|NABP1|NOC3L|NOLC1|PDLIM1|PHF16|POLR3G|SLC38A5|TMEM39A|UCK2|UMPS
BLALOCK_ALZHEIMERS_DISEASE_UP	MSigDB_C2	54	1688	28.2241	5.08554	3.19905	1	5.06848	3.52261e-06	0.000198987	++/++	ACTR8|ARHGAP17|AVEN|BCL2|C16ORF5|CCR10|CD37|CD44|CDK12|CFLAR|CHD1|CHD2|CKAP4|CNPY3|CSNK1E|DLEU1|ECI1|EHD1|ENOSF1|FA2H|GAB2|GCLC|HIST1H1C|IL10RA|IQGAP2|KIF13B|KIF14|LILRA2|LIMD1|LITAF|MAPKAPK2|MAT2A|METTL13|MOCOS|NOLC1|NOSIP|PAK2|PDCD4|PEBP1|PLAGL1|POLR1C|SCAMP2|SLC33A1|SMARCC1|SP100|SP110|SPIB|ST6GALNAC4|TGIF1|TLE4|TNFAIP8|UGCG|ULK2|WDR6|EXCLUDED_GENES:|PIM1
IRF4_myeloma_induced_all	SignatureDB	18	301	5.03358	2.21255	5.98007	1	5.86039	3.69802e-06	0.000207946	+*	ABHD10|BCL2|BSPRY|CFLAR|CTR9|DUSP5|ELL2|FAM100B|FKBP11|HK2|HSP90B1|MOCOS|PIM2|RAB30|SLAMF7|SLC38A2|SUB1|UCK2|EXCLUDED_GENES:|IRF4
Human Lymphoma_Staege08_50genes_UpRegulated_chemoResistant (18400362-Figure4a)	GeneSigDB	7	40	0.669439	0.810684	17.5	1	7.80891	4.02984e-06	0.00022558	++	CACNA1D|CD44|CHST7|EPHB1|GAB2|MARCKS|XK
Mouse Bone_Boylan07_823genes (17483317-TableS5)	GeneSigDB	28	639	10.689	3.20139	4.38185	1	5.40735	4.1187e-06	0.000228486	++	AFF3|BCL3|CCR7|CD44|CHST7|EHHADH|ELL2|ELOVL7|FAM129C|FAM46C|FZD6|GPM6A|GPR183|HOOK1|IL2RA|IQGAP2|IRF2BP2|MARCKS|MTHFD1|NOLC1|NT5DC2|PDLIM1|RAB30|SPIB|ST3GAL5|TFRC|TYMS|VOPP1|EXCLUDED_GENES:|CCND2|ENTPD1
Human Kidney_Sallustio10_2134genes_DiscriminatedARPCsFromRPTEC_MSC (19843711-TableS1)	GeneSigDB	54	1697	28.3788	5.09572	3.18209	1	5.02797	4.11357e-06	0.000228486	++	ACSM3|ACTR8|AKIRIN1|ATP13A3|ATP1B3|B4GALT1|BCL2|C7ORF23|CD44|CD47|CFLAR|CKAP4|CSDA|CTR9|DCTD|DLEU1|DOCK10|DUSP5|EHD1|EHHADH|ELL2|FASTKD1|FNBP1L|FTSJ1|GNPTAB|HK2|HSP90B1|IGSF3|KLHL21|LEPREL1|LITAF|MARCKS|METTL13|MRPL3|MSRB1|MTDH|NDUFV2|PCK2|PDE4B|PHACTR1|PHACTR2|PPIB|PTPN2|RAB7L1|SEC13|SLC38A2|SOGA2|ST3GAL5|TARS|TLE1|TLE4|TOR1AIP1|TRAM2|UGCG|EXCLUDED_GENES:|CCND2|ENTPD1|PTPN1
LI_INDUCED_T_TO_NATURAL_KILLER_UP	MSigDB_C2	18	305	5.10112	2.22706	5.90164	1	5.7919	4.44377e-06	0.000244328	++/++	BATF|CD69|DUSP5|ECI1|HK2|IQGAP2|ITGAE|LAG3|LITAF|MINA|MLKL|PPIB|SEC61B|SIDT1|SLAMF7|SLC19A2|SNX18|ZBTB32|EXCLUDED_GENES:|CCND2
Mouse Viral_Buonomo11_5307genes (21205295-TableS1)	GeneSigDB	87	3242	54.2261	6.80539	2.68353	1	4.81588	4.42609e-06	0.000244328	++	ABHD10|ACPP|ADAMTS6|ADRB2|ASPHD2|BCL2|BMPR2|BTLA|CACNA1D|CCDC113|CCR7|CD37|CD47|CD69|CELF2|CFLAR|CHML|CHST2|DHRS13|DNMT3A|ELOVL7|FAIM3|FAM100B|FAM129C|FECH|FKBP11|GABPB1|GPM6A|GPR183|HCK|HOOK1|IGHM|IGSF3|IKZF1|IL10RA|IL12A|IQGAP2|KIF14|LBH|LEPREL1|LITAF|LPIN2|LRRC33|LYN|MANF|MARCH3|MCM2|MINA|MOCOS|NEK3|NETO2|NGLY1|P2RY10|PAK1|PARP3|PARVB|PCYT1A|PION|PKN3|PLAC8|PLAGL1|PLBD1|PLCL2|PLEKHG1|RAB30|RAS…
WANG_RESPONSE_TO_GSK3_INHIBITOR_SB216763_DN	MSigDB_C2	20	368	6.15395	2.44287	5.43478	1	5.66794	4.58782e-06	0.000251132	*+/+*	C10ORF2|C16ORF88|CABLES1|DBN1|EBNA1BP2|EHD1|FAM100B|FAM46C|GMFG|HIST1H2BB|MCM2|PDCD4|PIM2|SLC38A2|SLC38A5|TCEB3|TFRC|TLE4|TYMS|UMPS|EXCLUDED_GENES:|PIM1
ABC_gt_GCB_LC	SignatureDB	3	3	0.050452	0.222465	100	1	13.2585	4.64533e-06	0.00025316	+*	CCDC50|IGHM|TBC1D27|EXCLUDED_GENES:|BLNK|BMF|CCND2|ENTPD1|ETV6|FOXP1|FUT8|IL16|IRF4|PIM1|PTPN1|SH3BP5
KASLER_HDAC7_TARGETS_1_UP	MSigDB_C2	14	192	3.21414	1.77054	7.29167	1	6.09185	4.74076e-06	0.000257228	+*/**	AEN|B4GALT1|BCL2|BPGM|CHST2|DNMT3A|ERP29|FGD2|IKZF1|MARCH3|PCYT1A|ST3GAL5|STAT3|UGCG|EXCLUDED_GENES:|IRF4
BIOPOLYMER_MODIFICATION	MSigDB_C5	28	644	10.772	3.21154	4.34783	1	5.3644	4.76824e-06	0.000257589	++	ADPRH|CD37|CDK12|CDKL1|CSNK1E|DNMT3A|DUSP5|ERN1|GMFG|HCK|IL12A|LYN|MAPKAPK2|OXSR1|PAK1|PAK2|PARP3|PARP4|PIM2|PKN3|PLK3|PNP|PRKCB|PTPLA|PTPN2|PTPRJ|SIK3|TLK1|EXCLUDED_GENES:|CCND2|FUT8|PIM1
FINETTI_BREAST_CANCER_KINOME_GREEN	MSigDB_C2	5	16	0.267582	0.512679	31.25	1	9.23076	4.79363e-06	0.000257835	++	HCK|LYN|MLKL|PIM2|PRKCB
NUYTTEN_EZH2_TARGETS_UP	MSigDB_C2	38	1030	17.2182	4.0318	3.68932	1	5.15448	4.90435e-06	0.000262648	++/+*	ADAM8|ADAMTS6|ADRB2|ARHGAP17|BMPR2|CD44|CD47|CD69|CFLAR|CHST7|CKAP4|DNMT3A|EHD1|HIVEP1|HK2|HSP90B1|KLHL21|MAN1A1|MARCKS|MLKL|NETO2|OAS1|OXSR1|PHTF1|PLAGL1|S1PR1|SLC2A13|SP100|SP140|SUB1|TCF4|TGFBR2|TLE4|TM2D3|TNFAIP8|WDFY1|ZNF586|ZNF614|EXCLUDED_GENES:|BMF|FUT8|PTPN1
BASSO_B_LYMPHOCYTE_NETWORK	MSigDB_C2	12	142	2.3767	1.52327	8.4507	1	6.31753	5.02979e-06	0.000268205	+*	CD44|EBNA1BP2|EIF4G1|FAIM3|LITAF|MRPL3|P2RY10|PION|PRKCB|SP100|UCK2|ZMYND11|EXCLUDED_GENES:|CCND2
PHOSPHORYLATION	MSigDB_C5	18	308	5.1507	2.23382	5.84416	1	5.75216	5.08926e-06	0.000269902	++	CDK12|CDKL1|CSNK1E|ERN1|GMFG|HCK|IL12A|LYN|MAPKAPK2|OXSR1|PAK1|PAK2|PIM2|PKN3|PLK3|PRKCB|SIK3|TLK1|EXCLUDED_GENES:|CCND2|PIM1
Human Breast_Speers09_780genes (19808870-ST1)	GeneSigDB	31	758	12.6825	3.47287	4.08971	1	5.27445	5.10525e-06	0.000269902	++	ADRB2|BMPR2|CDK12|CDKL1|COPB2|CSNK1E|DUSP5|EPHB1|ERN1|GMFG|HCK|HK2|KIF13B|LYN|MAP3K5|MAPKAPK2|MLKL|NEK3|OXSR1|PAK1|PAK2|PCK2|PIM2|PKN3|PRKCB|PTPRJ|SIK3|TGFBR2|TLK1|UCK2|ULK2|EXCLUDED_GENES:|BLNK|PIM1
Human Lung_Dauer05_200genes (15735721-SuppTable1a)	GeneSigDB	14	194	3.24484	1.78101	7.21649	1	6.03881	5.34536e-06	0.000280201	++	BCL3|CHD1|CSDA|DUSP5|ELL2|HK2|LBH|LYN|PLAGL1|PNP|STAT3|TMEM184B|TNFAIP8|UGCG
POST_TRANSLATIONAL_PROTEIN_MODIFICATION	MSigDB_C5	23	471	7.8769	2.75674	4.88323	1	5.48586	5.33399e-06	0.000280201	++	CDK12|CDKL1|CSNK1E|DUSP5|ERN1|GMFG|HCK|IL12A|LYN|MAPKAPK2|OXSR1|PAK1|PAK2|PARP3|PIM2|PKN3|PLK3|PRKCB|PTPLA|PTPN2|PTPRJ|SIK3|TLK1|EXCLUDED_GENES:|CCND2|PIM1
Human StemCell_Macaulay07_298genes (17192395-TableS2c)	GeneSigDB	17	280	4.67955	2.13035	6.07143	1	5.78331	5.6219e-06	0.000293454	++	AEN|B9D1|C10ORF2|CCR7|CFLAR|CHST2|DDI2|ELL2|FECH|GCLC|GTF3A|MARCH3|PAK1|SLC38A5|TFRC|TGIF1|TM2D3
MTOR_UP.N4.V1_UP	MSigDB_C6	14	196	3.27829	1.78842	7.14286	1	5.99506	6.01749e-06	0.000312783	+*/*+	BATF|BSPRY|CCDC86|DBN1|DLEU1|EBNA1BP2|FKBP11|IDH3A|LPCAT4|PCK2|PHACTR2|POLR3G|RRP9|UGCG
Human StemCell_Nilsson07_3153genes (17616640-TableS3)	GeneSigDB	82	3029	50.6595	6.60944	2.70716	1	4.74178	6.46055e-06	0.000334408	++	ABCE1|ABHD10|ACSM3|ACTR8|ANXA11|AP3M2|ATP13A3|ATP1B3|AVEN|B4GALT1|BATF|BCL3|BSPRY|C5ORF45|CCR10|CD44|CD47|CD69|CDYL|CHST2|CHST7|CKAP4|CLINT1|COCH|CSNK1E|CTR9|CYB5B|DLEU1|DNMT3A|EHD1|EHHADH|GLO1|GNL3|GPX7|GRWD1|GTF3A|HCK|HEATR6|HIST1H1C|HIST1H2AC|HOOK1|HSP90B1|IER5|IVNS1ABP|KCTD5|KLF8|LBH|LEPREL1|LILRA2|LMAN1|LYN|MARCKS|METTL13|METTL8|MTDH|NEK3|NGLY1|NIPA2|NT5DC2|PARP4|PARVB|PDCD4|PEBP1|PECR|PHACT…
LIU_TARGETS_OF_VMYB_VS_CMYB_DN	MSigDB_C2	7	43	0.721038	0.841317	16.2791	1	7.46325	6.67094e-06	0.00034303	**/+*	ADRB2|ARHGAP24|CSDA|EHD1|KCNA3|MAPKAPK2|PTPRJ
TOOKER_GEMCITABINE_RESISTANCE_DN	MSigDB_C2	11	122	2.04136	1.41396	9.01639	1	6.33583	6.68259e-06	0.00034303	*+/++	AVEN|CD47|CYB5B|ERP29|GNL3|HSP90B1|IDH3A|LPCAT4|MTHFD1|TFRC|UGCG
ZWANG_CLASS_1_TRANSIENTLY_INDUCED_BY_EGF	MSigDB_C2	24	513	8.58472	2.87469	4.67836	1	5.36242	6.87113e-06	0.000351251	++	ADAMTS6|ADRB2|AKIRIN1|ANKRD12|ARHGEF3|C5ORF30|CHD1|EHD1|ELOVL7|FNBP1L|GCLC|IER5|IRF2BP2|KLHL21|LBH|LYN|MAT2A|NABP1|NOC3L|OXSR1|PLK3|SLC19A2|SLC38A2|STAMBPL1|EXCLUDED_GENES:|PIM1|PTPN1|SH3BP5
Mouse StemCell_Hutton04_134genes (15504237-Table1)	GeneSigDB	10	100	1.67225	1.27946	10	1	6.50878	6.97063e-06	0.000354871	+*	BTLA|CCL22|CD37|HCK|LYN|MPEG1|PTPN2|RAC2|STAT3|TNFRSF13B
POOLA_INVASIVE_BREAST_CANCER_UP	MSigDB_C2	17	285	4.76599	2.15316	5.96491	1	5.68189	7.10291e-06	0.000360123	++/**	CCL18|CCR7|CD69|FAIM3|FKBP11|GAB2|GPR183|IGHM|IKZF1|LILRB2|MAN1A1|MNDA|PLAC8|PRKCB|SLA|SP140|TYMS
SCHUHMACHER_MYC_TARGETS_UP	MSigDB_C2	9	80	1.33566	1.1433	11.25	1	6.70373	7.63207e-06	0.000385373	+*/**	ABCE1|ATP1B3|EBNA1BP2|MRPL3|MTHFD1|NOLC1|PEBP1|TFRC|UCK2
Human Viral_Feuerhake05_64genes (15870177-TableS1a)	GeneSigDB	8	61	1.0194	1.00166	13.1148	1	6.96902	7.76608e-06	0.00038584	++	BCL2|CCL22|CCR7|CD44|CD69|CFLAR|IL2RA|LITAF|EXCLUDED_GENES:|CCND2|IRF4
Human Viral_Chetaille09_425genes (19096012-TableS3)	GeneSigDB	19	349	5.84003	2.3773	5.44413	1	5.53569	7.73834e-06	0.00038584	+*	ARNT2|C9ORF91|CSDA|FNDC3A|GCLC|GNPTAB|HCK|IL10RA|IVNS1ABP|KIF13B|LILRA6|LILRB2|MNDA|OAS1|PION|SLAMF7|SLC33A1|ST3GAL5|TLE4|EXCLUDED_GENES:|ENTPD1
ENK_UV_RESPONSE_KERATINOCYTE_DN	MSigDB_C2	23	482	8.05954	2.78814	4.77178	1	5.35858	7.76518e-06	0.00038584	**/++	ABCE1|ADRB2|ANP32A|ATP1B3|CD44|CYB5B|DLEU1|DUSP5|ENOSF1|FZD6|IGSF3|MAP3K5|MRPL3|MTHFD1|NOLC1|PAK1|RDX|SMARCA2|SP100|TGFBR2|TYMS|UMPS|ZMYND11|EXCLUDED_GENES:|CCND2|PTPN1
CTTTGT_V$LEF1_Q2	MSigDB_C3	59	1959	32.772	5.44329	3.01174	1	4.81841	7.67935e-06	0.00038584	++	ADPGK|ADRB2|AFF3|AKIRIN1|ANKRD12|ANP32A|ARHGAP24|ATP1B3|BMPR2|CCDC50|CDK12|CHD1|CHD2|CHN2|CKAP4|CSNK1E|CTR9|DNMT3A|EHD1|EIF4G1|EML4|EPS15L1|FECH|FNBP1L|GAB2|GPM6A|HIVEP1|IVNS1ABP|KLF8|LEPROTL1|MAP3K5|MARCH3|MARCKS|MAT2A|MEX3C|NOSIP|PAK1|PARVB|PDCD4|PDLIM1|PKN3|PTPRJ|RAB30|RAC2|RNF138|SEC61A1|SLC38A2|SMARCA2|SMARCC1|STAT3|TET2|TGIF1|TLK1|TMEM39A|TOX2|TUBB4A|UBE2E3|WDR11|ZSCAN2|EXCLUDED_GENES:|ETV6…
FLECHNER_BIOPSY_KIDNEY_TRANSPLANT_OK_VS_DONOR_UP	MSigDB_C2	25	553	9.24806	2.97921	4.5208	1	5.28728	7.98438e-06	0.000395099	++/**	ACSM3|ANP32A|CD44|CFLAR|CNBP|CREB3L2|DCTD|FECH|FNBP1L|FNDC3A|GTF3A|IGHM|LEPROTL1|LITAF|MARCKS|MTDH|PPIB|RAB7L1|STAT3|SUB1|TGFBR2|TOMM70A|TOR1AIP1|UGCG|ZMYND11
PROTEIN_SERINE_THREONINE_KINASE_ACTIVITY	MSigDB_C5	14	201	3.36115	1.80969	6.96517	1	5.87884	8.03675e-06	0.000396106	++	CDKL1|CSNK1E|ERN1|MAP3K5|MAPKAPK2|OXSR1|PAK1|PAK2|PIM2|PLK3|PRKCB|SIK3|TGFBR2|TLK1|EXCLUDED_GENES:|PIM1
TBK1.DF_UP	MSigDB_C6	17	288	4.81785	2.16244	5.90278	1	5.63351	8.15098e-06	0.000400142	++/++	ADAM8|C16ORF5|DUSP5|FZD6|IGSF3|NETO2|P2RX5|PNP|RAB7L1|SACS|SLC33A1|SOGA2|STAM|TMEM184B|TNFAIP8|TRAM2|VOPP1
MODULE_18	MSigDB_C4	22	450	7.52618	2.69531	4.88889	1	5.37001	8.38352e-06	0.000409931	++	AP3B1|C5ORF30|CD44|CDYL|COL9A3|CYB5B|GYG1|IGSF3|MCM2|MRPL3|MTHFD1|NFKBIB|NOLC1|RAC2|ST3GAL5|ST6GALNAC4|TFRC|TGIF1|TOR1AIP1|TRAM2|TYMS|UCK2
BILD_MYC_ONCOGENIC_SIGNATURE	MSigDB_C2	14	202	3.37838	1.81374	6.93069	1	5.8562	8.50599e-06	0.000414282	++	ADAM8|ALG3|C10ORF2|CCDC86|CFLAR|GNL3|HIST1H2AC|HK2|IPO4|LSG1|MCOLN2|NOLC1|PMM2|RRP9
Mouse StemCell_Schimmer06_1554genes (16484322-SuppTable3)	GeneSigDB	44	1306	21.8392	4.50893	3.36907	1	4.91487	8.671e-06	0.000420662	++	ABCE1|ADPGK|ADPRH|AP3B1|ATP1B3|B4GALT1|BPGM|CACNA1D|CD44|CHD1|CKAP4|CSDA|CSNK1E|DCTD|DNMT3A|ELL2|ERN1|FECH|FNBP1L|GCLC|IDH3A|IGSF3|LIMD1|MAPKAPK2|MARCKS|MAT2A|MRPL3|MSRB1|MTDH|NDUFV2|NETO2|NOSIP|PAK2|PHTF1|PPIB|PTPN2|RDX|SLC25A30|SLC38A2|SMARCC1|TCEB3|TESC|TFRC|WDR6
GUTIERREZ_WALDENSTROEMS_MACROGLOBULINEMIA_1_DN	MSigDB_C2	4	9	0.150695	0.385274	44.4444	1	9.99108	9.09313e-06	0.000439384	**/+*	FAM46C|GPR183|HCK|TNFRSF13B
SHIPP_DLBCL_CURED_VS_FATAL_DN	MSigDB_C2	7	45	0.753175	0.860038	15.5556	1	7.26343	9.12793e-06	0.000439384	**/+*	PDCD4|PDE4B|PHF16|PRKCB|SLA|TGIF1|TLE1
Pan_B_U133plus	SignatureDB	9	82	1.37135	1.15885	10.9756	1	6.58292	9.36514e-06	0.000445601	++	AFF3|COCH|COL9A3|FAM129C|KIAA0226L|PLEKHG1|RAB30|SPIB|TCF4|EXCLUDED_GENES:|BLNK
Hematopoietic_Node1658	SignatureDB	9	82	1.37203	1.15951	10.9756	1	6.57861	9.36514e-06	0.000445601	+*	CD37|CNPY3|GMFG|IKZF1|IL10RA|PLAC8|RAC2|SP100|SP110
MODULE_44	MSigDB_C4	18	322	5.38961	2.28675	5.59006	1	5.51454	9.36318e-06	0.000445601	++	BCL2|CCL18|CD37|CD44|CD69|CELF2|FAIM3|GMFG|IGHM|IKZF1|P2RY10|RAC2|RNASE6|SLA|SP100|TGFBR2|TNFAIP8|UGCG
CHIANG_LIVER_CANCER_SUBCLASS_PROLIFERATION_UP	MSigDB_C2	13	177	2.96272	1.70194	7.34463	1	5.89756	9.5532e-06	0.000452807	++/**	ARID3A|CKAP4|CSDA|DBN1|ELOVL7|HK2|KIF14|MARCH3|MARCKS|MCM2|NT5DC2|PLBD1|UGCG
Mouse StemCell_Ulloa-Montoya07_546genes (17683608-TableS1)	GeneSigDB	22	454	7.59335	2.70499	4.84581	1	5.32596	9.62685e-06	0.000454556	++	ADAM8|ARHGAP17|ATP13A3|CACNA1D|CHN2|ERP29|GAB2|GMPPB|GNPTAB|IGSF3|LEPREL1|LPCAT4|LYN|MAP3K5|MYOCD|PARVB|PDLIM1|SEC61A1|SLC43A3|SRPRB|USP46|WDFY1|EXCLUDED_GENES:|FUT8
KINSEY_TARGETS_OF_EWSR1_FLII_FUSION_UP	MSigDB_C2	43	1270	21.2324	4.44771	3.38583	1	4.89411	9.79023e-06	0.000460513	+*/*+	AEN|AKIRIN1|ANP32A|ARHGAP17|CCDC86|CDYL|CYB5B|FAM108C1|GABPB1|GPD2|HK2|HOOK1|IDH3A|KIAA0226L|KIF13B|KIF14|LBH|MAT2A|MCM2|METTL8|MTDH|MTHFD1|NETO2|NOC3L|PAK2|PCK2|PECR|PIAS2|PRKCB|RNF126|RNF138|SIK3|SLC38A5|SLC43A3|SMARCC1|SMC6|TLK1|TOX2|TSEN2|TYMS|UCK2|UMPS|ZNF107|EXCLUDED_GENES:|CCND2
FLECHNER_PBL_KIDNEY_TRANSPLANT_REJECTED_VS_OK_UP	MSigDB_C2	8	63	1.05492	1.01705	12.6984	1	6.82864	9.92036e-06	0.000463882	+*/**	CD47|HIST1H2AC|LITAF|LYN|MTDH|POLR1C|UBE2E3|ULK2
OSWALD_HEMATOPOIETIC_STEM_CELL_IN_COLLAGEN_GEL_UP	MSigDB_C2	15	233	3.90133	1.94936	6.43777	1	5.6935	9.93685e-06	0.000463882	+*/++	ACSM3|CD44|CFLAR|EHD1|GCLC|GPR183|HK2|HOOK1|IER5|IL12A|PDE4B|SIK3|TCF4|TLE4|USP46
Human Prostate_Wallace08_489genes (18245496-SuppTable2)	GeneSigDB	20	388	6.49106	2.50537	5.15464	1	5.392	1.00194e-05	0.000465976	++	CCR7|CD37|CD69|CELF2|DOCK10|ENOSF1|FAIM3|GMFG|GPM6A|GPR183|IGHM|IL10RA|LILRB2|PIM2|PLAC8|RNASE6|SLA|TLE1|TLE4|TYMS|EXCLUDED_GENES:|IL16
BUYTAERT_PHOTODYNAMIC_THERAPY_STRESS_DN	MSigDB_C2	27	636	10.6418	3.19689	4.24528	1	5.11691	1.08364e-05	0.000502085	++/++	ADRB2|ANP32A|AP3M2|BCL2|CFLAR|CHST2|DLEU1|EML4|HK2|IVNS1ABP|LBH|MAP3K5|MAT2A|METTL13|PHTF1|PLCL2|RAC2|SLC43A3|SUB1|TCEB3|TCTN3|TGFBR2|THYN1|TLE4|TRAM2|TSEN2|VOPP1
REGULATION_OF_TRANSCRIPTION	MSigDB_C5	25	564	9.43309	3.00894	4.43262	1	5.17356	1.11626e-05	0.000515269	+*	ARNT2|BCL3|CARD11|CHD1|CHD2|CNBP|CSDA|GCLC|LIMD1|LITAF|PDCD4|PLAGL1|POLR3G|SMARCA2|SMARCC1|SP100|SPIB|STAT3|SUB1|TCEB3|TCF4|TGIF1|TLE1|ZBTB32|ZMYND11|EXCLUDED_GENES:|IRF4
TRANSCRIPTION	MSigDB_C5	30	751	12.5594	3.46322	3.99467	1	5.03595	1.14288e-05	0.000525596	+*	ARNT2|BCL3|CARD11|CHD1|CHD2|CNBP|CSDA|ELL2|GCLC|GTF3A|IVNS1ABP|LIMD1|LITAF|NFKBIB|PDCD4|PLAGL1|POLR1C|POLR3G|SMARCA2|SMARCC1|SP100|SPIB|STAT3|SUB1|TCEB3|TCF4|TGIF1|TLE1|ZBTB32|ZMYND11|EXCLUDED_GENES:|IRF4
HOSHIDA_LIVER_CANCER_SUBCLASS_S1	MSigDB_C2	15	236	3.94726	1.96334	6.35593	1	5.62956	1.15742e-05	0.000530313	++	ADAM8|ATP1B3|CCR7|CD37|CD47|CELF2|DUSP5|LITAF|LYN|PAK1|PIM2|PNP|RNASE6|SLA|TCF4|EXCLUDED_GENES:|CCND2
Mouse Lung_Rangasamy09_1540genes (19286929-SuppTable2q)	GeneSigDB	36	992	16.5912	3.95985	3.62903	1	4.90141	1.2558e-05	0.000573266	++	ANKRD12|AP3M2|BPGM|CD200|CELF2|CHD1|CHN2|CHST7|DNMT3A|EPM2AIP1|FAIM3|FASTKD1|FTSJ1|GYG1|HCK|HEATR6|LBH|LMAN1|METTL8|MTDH|MTHFD1|NABP1|NGLY1|NOSIP|P2RY10|PION|PLAC8|RNASE6|SLC2A13|SMC6|SP100|SPATA5|TOMM70A|TRAM2|WDFY1|WDR6
Human HeadandNeck_Jarvinen06_325genes (16715129-SuppTable3)	GeneSigDB	17	299	4.99833	2.20127	5.68562	1	5.45216	1.32823e-05	0.000601889	+*	ACPP|ADPRH|ALG3|ATP1B3|BMPR2|CDYL|COCH|CSNK1E|PARP4|PTPN2|RAB30|SMC6|TARS|TFRC|TGIF1|THYN1|TYMS|EXCLUDED_GENES:|PTPN1
Human Leukemia_Teuffel04_726genes (15257931-SuppTableA)	GeneSigDB	25	570	9.53213	3.02566	4.38596	1	5.11224	1.33448e-05	0.000602514	++	ABCE1|AFF3|ATP1B3|BCL3|C9ORF91|CCL18|CD44|CYB5R2|FNBP1L|GNPTAB|GTF3A|IDH3A|IQGAP2|KIAA0226L|MINA|MRPL3|MTDH|PCK2|PNP|PRKCB|SIDT1|STAT3|TOR1AIP1|UBE2E3|UCK2
HRAS_overexpression_2x_UP	SignatureDB	13	184	3.07691	1.73449	7.06522	1	5.72106	1.44907e-05	0.00065187	++/*+	ADAM8|ADRB2|B4GALT1|C19ORF10|CSNK1E|DUSP5|EHD1|ELOVL7|HK2|NFKBIZ|OXSR1|RRP9|TOR1AIP1|EXCLUDED_GENES:|PIM1
Human Viral_Urosevic07_347genes (17823660-TableS1a)	GeneSigDB	17	303	5.06992	2.21666	5.61056	1	5.38201	1.57665e-05	0.000704142	++	ADRB2|ANKRD12|ATXN7L1|CASP10|CCL22|CD69|HIST1H2AC|MNDA|OAS1|PCYT1A|PIM2|SMCHD1|SP100|SP110|SUB1|TLE4|UMPS|EXCLUDED_GENES:|IL16
Lymph_node_High_vs_low	SignatureDB	0	647	10.8265	3.22168	0	0	-3.36053	1.57459e-05	0.000704142	-+
Human Lymphoma_Rimsza08_37genes (18544678-Table1)	GeneSigDB	6	33	0.551021	0.735363	18.1818	1	7.40991	1.59502e-05	0.000708523	++	B4GALT1|BCL2|PDCD4|PDE4B|PRKCB|TLE1|EXCLUDED_GENES:|CCND2
Mouse InnerEar_Sajan08_2724genes (17660535-TableS4c)	GeneSigDB	68	2428	40.6081	6.00268	2.80066	1	4.56329	1.59791e-05	0.000708523	++	ABHD10|ANP32A|ATP13A3|ATP1B3|BCL2|BPGM|BSPRY|CABLES1|CELF2|CHD1|COL9A3|CREB3L2|CSDA|CSNK1E|CYB5B|DNMT3A|EBNA1BP2|ECI1|EIF4G1|ERP29|FZD6|GCDH|GLO1|GPM6A|HIST1H1C|IQGAP2|LITAF|LMAN1|MANF|MARCKS|MCM2|MTDH|MTHFD1|NABP1|NFKBIZ|NGLY1|PAK1|PAK2|PARL|PCYT1A|PDE4B|PDLIM1|PHACTR1|PLAGL1|POLR1C|PRKCB|RAP1GDS1|RASGRF1|RDX|SCAMP2|SEC61B|SMC6|SMU1|SNX18|ST3GAL5|SUB1|TCF4|TCTN3|TGFBR2|TGIF1|THYN1|TLE1|TM2D3|TRI…
Human Lymphoma_Sorich08_50genes (18416598-TableS3)	GeneSigDB	7	49	0.817871	0.896467	14.2857	1	6.8961	1.6313e-05	0.000718179	+*	BCL3|CD37|FAIM3|RAB7L1|SMARCA2|STAT3|TYMS
Human Leukemia_Sorich08_50genes (18416598-SuppTable3)	GeneSigDB	7	49	0.821344	0.898588	14.2857	1	6.87596	1.6313e-05	0.000718179	+*	BCL3|CD37|FAIM3|RAB7L1|SMARCA2|STAT3|TYMS
ENK_UV_RESPONSE_EPIDERMIS_DN	MSigDB_C2	23	506	8.4627	2.85767	4.54545	1	5.08711	1.68829e-05	0.000738016	++/++	BCL3|CCL22|ELL2|ERP29|GAB2|GPR183|HK2|HOOK1|IVNS1ABP|MAPKAPK2|MAT2A|OXSR1|PDCD4|PDE4B|PLAGL1|PNP|PRKCB|STAM|TCF4|TFRC|UCK2|UGCG|ZBTB11|EXCLUDED_GENES:|PIM1
Human Breast_Turner10_324genes (20101236-SuppTable7a)	GeneSigDB	16	274	4.58313	2.11133	5.83942	1	5.40744	1.71284e-05	0.00074611	+*	ADPGK|ATP13A3|CSDA|GAB1|GYG1|HEATR6|IDH3A|LSG1|MAPKAPK2|METTL13|NGLY1|PAK1|PARL|TARS|TSHZ1|UMPS|EXCLUDED_GENES:|ETV6
NUYTTEN_NIPP1_TARGETS_DN	MSigDB_C2	32	846	14.1459	3.66179	3.78251	1	4.87578	1.7307e-05	0.000751244	+*/++	ANP32A|ATP13A3|B4GALT1|BMPR2|CCDC50|CCDC86|CLINT1|COCH|DUSP5|FAM100B|FAM46C|KCTD5|LEPROTL1|NT5DC2|PAK2|PHTF1|PLCL2|RAC2|RNF138|SEC61A1|SLC38A2|SLC43A3|SMARCA2|SMU1|TBL1XR1|TMEM184B|TUBB4A|TYMS|UBE2W|VASH2|VOPP1|XK
REGULATION_OF_NUCLEOBASENUCLEOSIDENUCLEOTIDE_AND_NUCLEIC_ACID_METABOLIC_PROCESS	MSigDB_C5	26	616	10.304	3.14549	4.22078	1	4.99001	1.7431e-05	0.000753984	+*	ARNT2|BCL3|CARD11|CHD1|CHD2|CNBP|CSDA|GCLC|LIMD1|LITAF|PDCD4|PLAGL1|POLR3G|SMARCA2|SMARCC1|SP100|SPIB|STAT3|SUB1|TCEB3|TCF4|TGIF1|TLE1|TLK1|ZBTB32|ZMYND11|EXCLUDED_GENES:|IRF4
LINDSTEDT_DENDRITIC_CELL_MATURATION_C	MSigDB_C2	8	68	1.13736	1.05554	11.7647	1	6.50153	1.76055e-05	0.000757521	+*	CCR7|CD200|PLAGL1|S1PR1|STAT3|TFRC|TRAFD1|UGCG|EXCLUDED_GENES:|PTPN1
GNF2_CASP1	MSigDB_C4	10	111	1.8555	1.34626	9.00901	1	6.04974	1.76353e-05	0.000757521	+*	CD44|CNPY3|GMFG|HCK|IL10RA|LILRA2|LILRA6|LILRB2|MNDA|PLBD1
GARY_CD5_TARGETS_UP	MSigDB_C2	22	473	7.9096	2.75984	4.65116	1	5.10552	1.81298e-05	0.000776067	++/++	BCL2|BCL3|CCR7|CD37|CD69|CSNK1E|DUSP5|IGHM|IL10|IRF2BP2|LPCAT4|P2RX5|PARVB|PCK2|PDCD4|PIM2|SLC38A2|SPIB|ST6GALNAC4|TARS|TCF4|WDFY1
MARTORIATI_MDM4_TARGETS_FETAL_LIVER_DN	MSigDB_C2	23	509	8.51604	2.86704	4.51866	1	5.05188	1.85316e-05	0.000790532	*+/++	C16ORF88|C6ORF106|CHST2|CKAP4|EIF4G1|ELL2|EPM2AIP1|FAM46C|IVNS1ABP|MAPKAPK2|MTDH|NOLC1|PCYT1A|PLAGL1|SLC38A2|SMC6|ST3GAL5|TCF4|TFRC|TSHZ1|UGCG|UMPS|ZMYND11|EXCLUDED_GENES:|FOXP1|PIM1|SH3BP5
Human StemCell_Hao09_173genes (20077526-TableS5)	GeneSigDB	11	136	2.27427	1.48989	8.08824	1	5.85663	1.88225e-05	0.000800181	++	ACSM3|FAM100B|GPM6A|LYN|MAN1A1|MARCKS|MOCOS|NABP1|SMARCA2|TBL1XR1|TLE1
Human StemCell_Cai06_1370genes (16293578-SuppTable2)	GeneSigDB	41	1220	20.4114	4.36743	3.36066	1	4.71412	1.8948e-05	0.000802757	++	ACPP|AKIRIN1|ARHGEF3|ARNT2|B4GALT1|BSPRY|CABLES1|CCDC86|CD47|CHST7|CKAP4|CNTNAP1|COCH|EHD1|ELL2|EPM2AIP1|FNDC3A|GNPTAB|GPM6A|IL17RB|LBH|LRRC33|MTHFD1|NOC3L|PAK1|PDCD4|PIAS2|PIM2|PLBD1|PRKCB|PTPN2|RNF138|RRP9|S1PR1|SELRC1|SMARCA2|ST3GAL5|TARS|TESC|TSHZ1|ZADH2|EXCLUDED_GENES:|FOXP1
SMIRNOV_RESPONSE_TO_IR_6HR_DN	MSigDB_C2	10	112	1.87012	1.3521	8.92857	1	6.01278	1.90798e-05	0.000805173	++/++	C5ORF30|CD69|HK2|KIF14|LPCAT4|OAS1|P2RX5|POLR3G|RNASE6|ZBTB32|EXCLUDED_GENES:|ENTPD1|IL16
BENPORATH_SOX2_TARGETS	MSigDB_C2	29	733	12.2584	3.42115	3.95634	1	4.89354	1.91351e-05	0.000805173	++	AKIRIN1|ANP32A|AP3B1|AVEN|CABLES1|CDK12|CDYL|CSNK1E|CYB5R2|EPM2AIP1|FAM100B|GNPTAB|HSP90B1|LSG1|MEX3C|NOC3L|PAK1|PNP|POLR3G|PTPN2|SELRC1|SLC38A2|STAT3|TBL1XR1|TLE1|TRIT1|UBE2W|VASH2|ZSCAN2|EXCLUDED_GENES:|FOXP1
ACEVEDO_LIVER_CANCER_UP	MSigDB_C2	35	972	16.2534	3.92254	3.60082	1	4.77921	1.95727e-05	0.000820791	++/*+	ARMC7|AVEN|CDK12|CNPY3|COPB2|DOCK10|ENOSF1|FKBP11|GMFG|GPX7|HIST1H1C|HIST1H2AC|IPO4|MARCKS|METTL13|NGLY1|NOC3L|PAK1|PIM2|PLCL2|RAC2|RDX|S1PR1|SEC13|SLC33A1|SMARCC1|STAMBPL1|SUB1|TOR1AIP1|TRAM2|TRIT1|TYMS|UCK2|VOPP1|WDR11
Human Leukemia_Saito10_259genes (20371479-TableS2)	GeneSigDB	15	247	4.13382	2.00598	6.07287	1	5.4169	1.98175e-05	0.000828249	+*	ADRB2|C1ORF186|CLECL1|COCH|HCK|IDH3A|IL2RA|MNDA|NABP1|PDLIM1|PNP|SELRC1|SLC43A3|TESC|UGCG
Human Cervical_Rosty05_814genes (15869706-TableS2)	GeneSigDB	26	621	10.3819	3.15371	4.1868	1	4.95231	2.00119e-05	0.000833558	++	ADAM8|CCL18|CD69|CDYL|COL9A3|DOCK10|ELL2|GABPB1|HK2|IGHM|LAG3|LILRA6|LILRB2|LMAN1|MAN1A1|MOCOS|MSRB1|P2RX5|PDE4B|PLCL2|PRKCB|RASGRF1|RNASE6|SLA|TCF4|TLK1
Human StemCell_Nuytten08_1622genes (17724462-TableS1)	GeneSigDB	46	1440	24.0887	4.71601	3.19444	1	4.64615	2.05765e-05	0.000854202	++	ADAMTS6|ADPGK|ANP32A|ANXA11|ARMC7|ATP13A3|B4GALT1|BMPR2|C5ORF30|CCDC50|CD44|CLINT1|COCH|DUSP5|FAM100B|FAM46C|HIST1H1C|HIST1H2AC|HIST1H2BB|HK2|KCTD5|LITAF|LPCAT4|NOC3L|NT5DC2|OAS1|PAK2|PHTF1|RAC2|RAP1GDS1|SLC27A5|SLC38A2|SMARCA2|SMU1|SP100|SP140|TBL1XR1|TCF4|TLE4|TM2D3|TUBB4A|TYMS|UBE2W|USP46|VASH2|XK|EXCLUDED_GENES:|FOXP1|PTPN1
SHEDDEN_LUNG_CANCER_GOOD_SURVIVAL_A12	MSigDB_C2	17	310	5.18163	2.24103	5.48387	1	5.27363	2.11254e-05	0.000874053	+*	ARHGAP17|BBIP1|BCL2|CHST2|COL9A3|EPS15L1|FAM46C|FKBP11|GRWD1|IDH3A|IGHM|MANF|PIM2|PTPN2|RRP9|SLAMF7|TRAM2|EXCLUDED_GENES:|CCND2|IRF4
PROTEIN_MODIFICATION_PROCESS	MSigDB_C5	26	625	10.4458	3.16519	4.16	1	4.91415	2.23208e-05	0.000920436	++	ADPRH|CD37|CDK12|CDKL1|CSNK1E|DUSP5|ERN1|GMFG|HCK|IL12A|LYN|MAPKAPK2|OXSR1|PAK1|PAK2|PARP3|PARP4|PIM2|PKN3|PLK3|PRKCB|PTPLA|PTPN2|PTPRJ|SIK3|TLK1|EXCLUDED_GENES:|CCND2|FUT8|PIM1
SHAFFER_IRF4_MULTIPLE_MYELOMA_PROGRAM	MSigDB_C2	6	35	0.586134	0.758151	17.1429	1	7.14088	2.27242e-05	0.000933958	+*	CFLAR|DUSP5|ELL2|PIM2|SLAMF7|SUB1|EXCLUDED_GENES:|IRF4
Mouse Lung_Rangasamy09_2003genes (19286929-SuppTable1)	GeneSigDB	50	1624	27.1579	4.99082	3.07882	1	4.57682	2.31878e-05	0.000949854	++	ADAM8|ADRB2|ATP13A3|BCL3|CD44|CHD1|CHD2|CKAP4|CSDA|CSNK1E|EHD1|ELL2|FAM100B|FAM46C|GCLC|GNL3|HIST1H1C|HK2|IER5|IRF2BP2|LITAF|LPIN2|LSG1|MANF|MAPKAPK2|NFKBIZ|NOLC1|NT5DC2|P2RY10|PDE4B|PLAGL1|PLK3|PTPRJ|RDX|S1PR1|SEC61A1|SLC19A2|SLC43A3|SMU1|STAT3|SUB1|TGFBR2|TGIF1|TLE1|TOMM70A|TOR1AIP1|TSHZ1|UCK2|WDR6|ZADH2|EXCLUDED_GENES:|ENTPD1|FOXP1|PIM1|PTPN1
Human StemCell_Kocer08_864genes (18667080-TableS2)	GeneSigDB	30	780	13.0451	3.52606	3.84615	1	4.80844	2.33573e-05	0.000953643	++	ANP32A|C5ORF30|CD200|CD47|CDYL|CELF2|DOCK10|ENOSF1|EPS15L1|GCLC|GNL3|GTF3A|KIF14|LEPROTL1|MANF|MCM2|NDUFV2|NIPA2|PTPN2|RDX|SMARCA2|SRPRB|STAT3|TARS|TFRC|TLE4|TM2D3|TUBB4A|TYMS|UMPS|EXCLUDED_GENES:|SH3BP5
Human StemCell_Hao09_612genes (20077526-TableS3)	GeneSigDB	21	446	7.46124	2.68414	4.70852	1	5.04399	2.34354e-05	0.000953683	++	ACSM3|ARHGEF3|COCH|COL9A3|FAM100B|GPM6A|HOOK1|LYN|MAN1A1|MARCKS|MAT2A|MOCOS|NABP1|NETO2|PLCL2|RAB7L1|SMARCA2|STAMBPL1|TBL1XR1|TGFBR2|TLE1
Human EmbryonicStemCell_Thomas08_1088genes (18689800-TableS7)	GeneSigDB	36	1023	17.1094	4.01869	3.51906	1	4.7007	2.41279e-05	0.000978643	++	ANP32A|ANXA11|ARID3A|BMPR2|CABLES1|CD44|CD47|CSDA|CSNK1E|DBN1|EBNA1BP2|GNL3|HSP90B1|IL2RA|IVNS1ABP|LITAF|LYN|MAPKAPK2|MCM2|MTHFD1|NFKBIB|PCYT1A|PEBP1|PTPN2|SCAMP2|SEC61A1|STAT3|TCEB3|TCF4|TFRC|TNFAIP8|TRIT1|TYMS|UBE2E3|UGCG|ZMYND11|EXCLUDED_GENES:|CCND2|ETV6|PTPN1
Human Breast_Vecchi08_792genes (17952122-GeneList)	GeneSigDB	24	556	9.30076	2.98651	4.31655	1	4.92188	2.56558e-05	0.00103496	++	ANKRD12|ANP32A|BCL2|CCR7|CELF2|COCH|DOCK10|FAIM3|HIST1H2AC|IGHM|IGSF3|IQGAP2|KIAA0226L|MTDH|P2RX5|PDE4B|PLAC8|PRKCB|RAB7L1|SP100|SP110|TCF4|TNFAIP8|UGCG|EXCLUDED_GENES:|BLNK|ENTPD1
MILI_PSEUDOPODIA_HAPTOTAXIS_DN	MSigDB_C2	27	668	11.1781	3.26851	4.04192	1	4.8407	2.56836e-05	0.00103496	**/++	ADRB2|ALG3|B4GALT1|C16ORF5|C19ORF10|CD47|CKAP4|CNPY3|CREB3L2|CTR9|DHRS13|FKBP11|IPO4|LMAN1|MANF|PDCD11|SCAMP2|SEC61A1|SLC19A2|SLC38A2|SLC43A3|SRPRB|ST6GALNAC4|TM2D3|TMEM184B|TRAM2|TYMS
MARTENS_BOUND_BY_PML_RARA_FUSION	MSigDB_C2	21	450	7.52089	2.69178	4.66667	1	5.00751	2.67111e-05	0.00107287	+*	ADAM8|ANXA11|ARID3B|B4GALT1|BCL3|CELF2|DUSP5|FAM129C|GTF3A|HCK|IRF2BP2|KPTN|LYN|NOLC1|NOSIP|PLAC8|PTPRJ|RAC2|TESC|TOX2|UCK2
IRF4_myeloma_induced_direct	SignatureDB	6	36	0.603481	0.770077	16.6667	1	7.00777	2.68868e-05	0.00107643	+*	CFLAR|DUSP5|ELL2|PIM2|SLAMF7|SUB1|EXCLUDED_GENES:|IRF4
UEDA_PERIFERAL_CLOCK	MSigDB_C2	12	168	2.81181	1.65799	7.14286	1	5.54177	2.76512e-05	0.00110346	+*	ANP32A|CD47|CYB5B|GCLC|GLO1|HIST1H1C|LITAF|LPIN2|PNP|ST3GAL5|TARS|TLE1
REGULATION_OF_GENE_EXPRESSION	MSigDB_C5	27	671	11.2198	3.2778	4.02385	1	4.81427	2.77531e-05	0.00110397	+*	ARNT2|BCL3|CARD11|CHD1|CHD2|CNBP|CSDA|DNMT3A|GCLC|IL10|LIMD1|LITAF|PDCD4|PLAGL1|POLR3G|SMARCA2|SMARCC1|SP100|SPIB|STAT3|SUB1|TCEB3|TCF4|TGIF1|TLE1|ZBTB32|ZMYND11|EXCLUDED_GENES:|IRF4
MULLIGHAN_MLL_SIGNATURE_2_UP	MSigDB_C2	20	417	6.97215	2.59394	4.79616	1	5.02242	2.82048e-05	0.00111834	++/++	ADRB2|ARHGEF3|BATF|C16ORF88|CNPY3|CXORF21|ECI1|HCK|IKZF1|LILRA2|LILRB2|MAPKAPK2|MSRB1|PARL|PCYT1A|RAB7L1|RAC2|RNASE6|SLA|TOR1AIP1
SWEET_LUNG_CANCER_KRAS_UP	MSigDB_C2	22	488	8.16277	2.80495	4.5082	1	4.93315	2.91061e-05	0.00114914	++/++	C19ORF10|C9ORF91|CD44|EHD1|EIF4G1|ELL2|GABPB1|GNL3|HK2|IGHM|LITAF|LOC645638|MAN1A1|MANF|MPEG1|NABP1|PCYT1A|PLBD1|POLR1C|SFTPB|SLC38A2|TGIF1|EXCLUDED_GENES:|ENTPD1
Human Leukemia_Marcucci08_696genes (18450603-Table3S)	GeneSigDB	23	524	8.76507	2.90521	4.38931	1	4.8998	2.91674e-05	0.00114914	++	ADAM8|CCL18|HCK|IGHM|LILRA2|LILRA3|LILRA6|LILRB2|MNDA|NABP1|NETO2|P2RX5|PAK1|PHACTR1|PION|PTPLA|PTPRJ|RAB7L1|SH2D3C|SIK3|SLC43A3|TCF4|VASH2
ONDER_CDH1_TARGETS_1_DN	MSigDB_C2	12	169	2.82625	1.65832	7.10059	1	5.53197	2.93231e-05	0.00115161	**/+*	ATP13A3|CYB5R2|EIF4G1|EML4|SLC43A3|SMARCC1|SP100|SUB1|TOR1AIP1|TSEN2|UGCG|UMPS
Human Breast_Hu06_1400genes (16643655-1300GenesList)	GeneSigDB	42	1289	21.5652	4.4813	3.25834	1	4.56002	3.06413e-05	0.00119957	++	ANP32A|ARNT2|BSPRY|C19ORF10|C5ORF30|CHST2|COL9A3|CSDA|DBN1|EIF4G1|ELL2|FA2H|FAM46C|FKBP11|GPX7|GTF3A|HEATR6|HIST1H2AC|HIST1H2BB|IQGAP2|KIF13B|LYN|MCM2|NOLC1|PDCD4|PIM2|PLAC8|PRKCB|RAB30|SLC19A2|SLC27A5|SMCHD1|SMU1|TARS|TBL1XR1|TFRC|THYN1|TYMS|UBE2E3|UGCG|WDR6|ZNF614|EXCLUDED_GENES:|ETV6|FOXP1|FUT8|IRF4
Myc_RNAi_OCILy3	SignatureDB	7	54	0.90244	0.939939	12.963	1	6.48719	3.13021e-05	0.00121773	+*	DLEU1|EIF4G1|GNL3|HSP90B1|NOLC1|SLC38A2|UCK2
chr3q29	MSigDB_C1	7	54	0.905003	0.942682	12.963	1	6.46559	3.13021e-05	0.00121773	+*	ATP13A3|CCDC50|LEPREL1|LRRC33|LSG1|PAK2|TFRC
TORCHIA_TARGETS_OF_EWSR1_FLI1_FUSION_DN	MSigDB_C2	17	320	5.35095	2.27862	5.3125	1	5.11232	3.15872e-05	0.00122497	*+/++	C16ORF5|CELF2|CXORF21|DNMT3A|DOCK10|ELL2|FKBP11|GMFG|HK2|HOOK1|IQGAP2|PAK1|PDE4B|PDLIM1|PLAC8|POLR3G|TNFRSF13B
Human Sarcoma_Mason04_402genes (15489886-TableS1a)	GeneSigDB	18	353	5.90677	2.38949	5.09915	1	5.061	3.1926e-05	0.00123424	++	ACPP|BPGM|CD44|CD69|CHST2|DUSP5|GMFG|HIST1H2AC|HK2|IQGAP2|PDE4B|PLK3|POLR1C|RAB7L1|RAC2|SLC43A3|SP100|SP140
Human Prostate_John-Aryankalayil09_2212genes (19139136-TableS3)	GeneSigDB	49	1602	26.7973	4.96518	3.05868	1	4.47169	3.32876e-05	0.00128287	++	ACSM3|ACTR8|AVEN|C16ORF5|C18ORF25|CCDC113|CD44|CD47|CHN2|CLINT1|CREB3L2|CYB5R2|ELL2|ENOSF1|ERN1|FTSJ1|GABPB1|GMPPB|IL10RA|IL12A|IL17RB|KIAA0226L|KIF14|LPCAT4|LRRC33|MCM2|MINA|NEK3|NFKBIB|P2RX5|PDE4B|PHACTR2|PLEKHG1|PLK3|PMM2|PTPRJ|RAB30|RAC2|SIK3|SNX18|SP100|SRPRB|ST3GAL5|TBL1XR1|TGFBR2|TGIF1|VASH2|VOPP1|ZNF614|EXCLUDED_GENES:|FUT8
ONO_FOXP3_TARGETS_UP	MSigDB_C2	5	23	0.384932	0.615007	21.7391	1	7.50409	3.35287e-05	0.00128815	+*/**	CCR7|IL10|ITGAE|PAK1|SLAMF7
RODRIGUES_THYROID_CARCINOMA_ANAPLASTIC_UP	MSigDB_C2	28	718	12.0116	3.38524	3.89972	1	4.72298	3.43687e-05	0.00131633	+*/++	ATP13A3|CDYL|CHML|DUSP5|EIF4G1|GABPB1|HK2|KCTD5|KIF14|LMAN1|MCM2|MOCOS|NABP1|PAK2|SLC38A2|SMC6|SP100|STAMBPL1|TARS|TBL1XR1|TFRC|TLK1|TOMM70A|TOX2|U2SURP|UCK2|UGCG|ZBTB11
PID_IL2_1PATHWAY	MSigDB_C2	7	55	0.920776	0.952178	12.7273	1	6.38455	3.5356e-05	0.00134996	++	BCL2|GAB2|IL2RA|MAPKAPK2|PRKCB|STAM|STAT3
chr18p11	MSigDB_C1	8	75	1.25446	1.10798	10.6667	1	6.08816	3.62936e-05	0.0013815	+*	ANKRD12|ENOSF1|NDUFV2|PTPN2|SMCHD1|SOGA2|TGIF1|TYMS
SMID_BREAST_CANCER_BASAL_UP	MSigDB_C2	26	644	10.7723	3.20956	4.03727	1	4.74449	3.69405e-05	0.00140181	++/*+	ATP13A3|C6ORF106|CCL18|CD44|CDYL|CHML|COCH|COL9A3|CSDA|CYB5R2|DBN1|IGHM|LEPREL1|LOC100505650|LYN|MCM2|MOCOS|NT5DC2|PLAGL1|PTPLA|SLC43A3|SPIB|TYMS|UBE2E3|UCK2|VASH2
CHICAS_RB1_TARGETS_SENESCENT	MSigDB_C2	24	569	9.51359	3.02008	4.21793	1	4.7967	3.70583e-05	0.00140198	++	ACPP|CD69|CHST2|CYB5R2|DUSP5|ENOSF1|FKBP11|GPD2|IVNS1ABP|MARCKS|MCM2|MTHFD1|NETO2|NFKBIZ|PION|PLAGL1|RNF138|SLC43A3|SMARCC1|SMC6|SP100|TGIF1|TNFAIP8|TYMS|EXCLUDED_GENES:|FUT8
Human Breast_Sotiriou03_485genes_Survival (12917485-Table9)	GeneSigDB	19	391	6.54261	2.51684	4.85934	1	4.94961	3.73593e-05	0.00140906	+*	ANXA11|ATP1B3|BCL2|BMPR2|CSNK1E|CYB5B|IRF2BP2|ITGAE|MCM2|MRPL3|NEK3|PAK2|PEBP1|PNP|PRKCB|RDX|SPIB|SRPRB|ZMYND11
MQ_NFKB	DU_MQ	15	261	4.36432	2.05775	5.74713	1	5.1686	3.75571e-05	0.00141221	++	BCL2|BCL2L10|BCL3|CCL22|CCR7|CD44|CD69|CFLAR|GCLC|IL10|IL12A|IL2RA|PIM2|PLK3|UGCG|EXCLUDED_GENES:|CCND2|IRF4|PIM1
FULCHER_INFLAMMATORY_RESPONSE_LECTIN_VS_LPS_DN	MSigDB_C2	21	461	7.7096	2.72958	4.55531	1	4.86902	3.79407e-05	0.00142232	++/++	B4GALT1|CD37|CHN2|CXORF21|ENOSF1|GAB2|IL10|LILRA2|LILRB2|LIMD1|LYN|MARCKS|MNDA|OAS1|PLCL2|RDX|SNX18|SP100|SP110|TGFBR2|WDR11
HUANG_GATA2_TARGETS_UP	MSigDB_C2	11	147	2.4559	1.54838	7.48299	1	5.51808	3.88157e-05	0.00145072	+*/+*	ARID3A|CD44|CD47|GAB1|GMFG|GYG1|IQGAP2|PLAC8|TGFBR2|TGIF1|TNFAIP8|EXCLUDED_GENES:|FUT8|IL16
XBP1_target_all	SignatureDB	8	76	1.27073	1.11638	10.5263	1	6.02774	3.99784e-05	0.00148968	+*	FTSJ1|HSP90B1|LMAN1|MANF|PPIB|SEC61A1|SLC33A1|ST6GALNAC4
Human Leukemia_Mullighan07_744genes (17597811-SuppTable5)	GeneSigDB	25	611	10.2227	3.13036	4.09165	1	4.72064	4.19767e-05	0.00155944	++	ABHD10|ADRB2|ARHGEF3|B4GALT1|BATF|C5ORF30|CD200|CNPY3|DLEU1|IKZF1|IL2RA|LILRA2|LILRB2|PARL|PCYT1A|PTPLA|PTPN2|RAB7L1|RAC2|RNASE6|SIDT1|SLA|SLC43A3|STAM|TOR1AIP1
DAZARD_RESPONSE_TO_UV_SCC_DN	MSigDB_C2	10	123	2.05767	1.41927	8.13008	1	5.59606	4.29848e-05	0.00159211	**/++	ATP13A3|CDYL|CHD1|PMM2|SACS|TGFBR2|TGIF1|TLK1|TNFAIP8|TRAM2
STAT3_up_OCILy10	SignatureDB	6	39	0.650529	0.798838	15.3846	1	6.69657	4.31698e-05	0.00159419	+*	GPR183|IL10|MIR155HG|MNDA|PTPN2|STAT3|EXCLUDED_GENES:|FUT8
Human Lymphoma_Chan01_8genes_ABLSubtype (11757704-Table1b)	GeneSigDB	3	5	0.083663	0.286645	60	1	10.174	4.53039e-05	0.00166802	+*	DCTD|KCNA3|PTPN2|EXCLUDED_GENES:|CCND2|ETV6
IZADPANAH_STEM_CELL_ADIPOSE_VS_BONE_UP	MSigDB_C2	10	125	2.0882	1.42752	8	1	5.54233	4.93415e-05	0.00181129	+*/*+	ARHGAP24|CD44|LYN|MAP3K5|MARCH3|PHACTR2|PLAGL1|STAMBPL1|TCEB3|UCK2
MODULE_16	MSigDB_C4	22	506	8.46201	2.85376	4.34783	1	4.7439	4.99259e-05	0.00182732	+*	ARID3A|CD47|CELF2|GPR183|GYG1|HCK|LILRA2|MCM2|MNDA|MRPL3|NFKBIB|NOLC1|PLK3|PMM2|PNP|RAC2|RRP9|SLA|ST6GALNAC4|TFRC|TNFAIP8|TYMS|EXCLUDED_GENES:|CCND2
PROTEIN_BINDING_BRIDGING	MSigDB_C5	7	58	0.970814	0.97619	12.069	1	6.17624	5.01797e-05	0.00183119	+*	BCL3|CHN2|CNTNAP1|GAB1|SH2D3C|SLA|STAM|EXCLUDED_GENES:|BLNK
WANG_LMO4_TARGETS_UP	MSigDB_C2	18	368	6.15579	2.43955	4.8913	1	4.85507	5.47617e-05	0.00198689	++/**	ATP13A3|C11ORF80|C5ORF30|CD47|CFLAR|CREB3L2|EPM2AIP1|FAM108C1|HSP90B1|LITAF|MTDH|NABP1|NT5DC2|PDCD4|PHACTR2|SNX18|SUB1|TLK1|EXCLUDED_GENES:|ETV6
Human Colon_Grade07_1950genes (17210682-SuppTable2)	GeneSigDB	48	1589	26.5777	4.94083	3.02077	1	4.33578	5.47675e-05	0.00198689	++	AFF3|ALG3|ANP32A|AP3B1|ATP13A3|ATXN7L1|C16ORF5|CARD11|CCDC86|CCR7|CD44|CELF2|CNBP|CNTNAP1|CSNK1E|DDI2|EML4|EPM2AIP1|GLO1|GTF3A|HIST1H1C|HIST1H2AC|HSP90B1|IDH3A|IL10|IPO4|MTHFD1|PARP4|PARVB|PCYT1A|PDCD11|PLAC8|POLR1C|PPIB|SEC13|SEC61A1|SEC61B|SLC27A5|SMARCC1|STAT3|SUB1|SUSD1|TARS|TGIF1|TSEN2|ULK2|ZNF107|ZNF511
TGACATY_UNKNOWN	MSigDB_C3	26	660	11.0418	3.24719	3.93939	1	4.60652	5.54376e-05	0.00200532	++	ADTRP|ARHGAP24|ARHGEF3|BCL2|BMPR2|CABLES1|CACNA1D|CCDC50|CCL22|EHD1|ERN1|GAB2|HOOK1|IGSF3|KIF13B|LEPROTL1|LITAF|MYOCD|PLBD1|RAB30|RAP1GDS1|STAT3|TBL1XR1|TET2|TRIT1|ZBTB32|EXCLUDED_GENES:|BLNK|PTPN1
OSMAN_BLADDER_CANCER_UP	MSigDB_C2	19	403	6.73979	2.55258	4.71464	1	4.80307	5.60315e-05	0.00202089	+*/++	ASPHD2|CD44|CD47|CHST2|EIF4G1|HSP90B1|IRF2BP2|LILRA2|MARCKS|MEX3C|MTDH|NFKBIZ|PARP4|PHACTR2|SCAMP2|TBL1XR1|TYMS|UBE2W|UGCG
SHAFFER_IRF4_TARGETS_IN_ACTIVATED_B_LYMPHOCYTE	MSigDB_C2	8	80	1.33763	1.14406	10	1	5.82342	5.79915e-05	0.0020855	+*	BCL2|BSPRY|CFLAR|ELL2|HK2|PNP|SLAMF7|UCK2|EXCLUDED_GENES:|IRF4
WANG_SMARCE1_TARGETS_DN	MSigDB_C2	18	370	6.18857	2.44945	4.86486	1	4.82207	5.87044e-05	0.00210502	*+/++	ABCE1|AFF3|BBIP1|CYB5B|GNL3|HK2|IDH3A|IER5|LOC645638|MAN1A1|NDUFV2|PLAGL1|POLR3G|PTPLA|RNF138|SACS|STAM|TLE4
Human Leukemia_Toren05_224genes (16140871-SuppTable7)	GeneSigDB	11	154	2.57764	1.58856	7.14286	1	5.3019	5.94039e-05	0.00212395	++	CCR7|CHST2|CKAP4|HCK|IL10RA|LBH|LILRA3|LILRA4|MNDA|RNASE6|UGCG
PID_PDGFRBPATHWAY	MSigDB_C2	10	128	2.13848	1.44796	7.8125	1	5.42939	6.03712e-05	0.00215231	++	GAB1|HCK|LYN|MYOCD|PAK1|PTPN2|PTPRJ|S1PR1|SLA|STAT3|EXCLUDED_GENES:|PTPN1
SCHAEFFER_PROSTATE_DEVELOPMENT_6HR_DN	MSigDB_C2	22	514	8.59405	2.87745	4.28016	1	4.65897	6.28616e-05	0.00223466	*+/++	AFF3|C19ORF10|CHD1|DNMT3A|EML4|FAM108C1|GPD2|HIST1H1C|HSP90B1|IRF2BP2|LEPROTL1|LITAF|MANF|MYOCD|NOLC1|PTPRJ|SCAPER|SMARCA2|TET2|TLK1|UGCG|ZBTB11
REGULATION_OF_CELLULAR_METABOLIC_PROCESS	MSigDB_C5	29	784	13.1118	3.52908	3.69898	1	4.50209	6.39727e-05	0.00226764	+*	ARNT2|BCL3|CARD11|CHD1|CHD2|CNBP|CSDA|GCLC|IL10|IL12A|LIMD1|LITAF|LYN|PDCD4|PLAGL1|POLR3G|SMARCA2|SMARCC1|SP100|SPIB|STAT3|SUB1|TCEB3|TCF4|TGIF1|TLE1|TLK1|ZBTB32|ZMYND11|EXCLUDED_GENES:|CCND2|IRF4
RGAANNTTC_V$HSF1_01	MSigDB_C3	20	443	7.40869	2.67184	4.51467	1	4.7126	6.54243e-05	0.00231247	++	ATP1B3|BMPR2|C7ORF23|CACNA1D|CHD1|CHD2|CHML|CHST2|EHD1|MAT2A|MYOCD|NETO2|NFKBID|NOSIP|PARVB|PKN3|PLBD1|SIDT1|TLK1|ZBTB32
SH3_SH2_ADAPTOR_ACTIVITY	MSigDB_C5	6	42	0.703816	0.831634	14.2857	1	6.3684	6.6536e-05	0.00234506	+*	CHN2|CNTNAP1|GAB1|SH2D3C|SLA|STAM|EXCLUDED_GENES:|BLNK
Human Lymphoma_Hummel06_24genes (16760442-SuppTable5-2)	GeneSigDB	4	14	0.233978	0.479573	28.5714	1	7.85286	6.7595e-05	0.00237562	+*	BCL3|CD44|CFLAR|STAT3
Human Breast_MorenoBueno06_117genes (17018611-Table2)	GeneSigDB	8	82	1.37158	1.15917	9.7561	1	5.71824	6.92633e-05	0.0024205	++	GAB1|MAP3K5|S1PR1|SMARCC1|TCF4|TGIF1|TLE1|ZNF275|EXCLUDED_GENES:|PTPN1
Proliferation_DLBCL	SignatureDB	26	669	11.1896	3.27631	3.8864	1	4.52044	6.91715e-05	0.0024205	+*	ANP32A|CCDC86|CELF2|CLINT1|CTR9|CYB5B|DLEU1|EIF4G1|FTSJ1|GLO1|GNL3|IKZF1|KIF14|LILRA4|MAPKAPK2|MAT2A|MCM2|MTHFD1|NDUFV2|NOLC1|OXSR1|PAK2|POLR1C|PPIB|SLC38A2|TCEB3
Tcell_PIind_CalciumDefPtdown4x_Feske_Fig4	SignatureDB	7	61	1.01972	1.0012	11.4754	1	5.97314	6.97448e-05	0.00243046	+*	CFLAR|ELL2|HIST1H2AC|IL10|MIR155HG|SLA|TFRC|EXCLUDED_GENES:|PTPN1
MARKEY_RB1_ACUTE_LOF_UP	MSigDB_C2	13	214	3.57787	1.86754	6.07477	1	5.0452	7.0034e-05	0.00243368	+*/**	ADAM8|FNDC3A|HCK|HIST1H1C|MCOLN2|MPEG1|MSRB1|PCYT1A|PLAC8|PNP|RAC2|SP100|UCK2
Human Pancreas_Rosero10_1018genes (20860821-TableS5)	GeneSigDB	29	789	13.1936	3.54648	3.67554	1	4.45694	7.14967e-05	0.00247755	++	ARHGEF3|C16ORF5|CACNA1D|CCR7|CD200|CD37|CFLAR|FGD2|FZD6|GLO1|IDH3A|LMAN1|MAP3K5|NIPA2|PDCD4|PDLIM1|PECR|PLAC8|PLCL2|RDX|SFTPB|SH2D3C|SMARCA2|SPIB|SUSD1|TMEM39A|TSHZ1|WDFY1|XK|EXCLUDED_GENES:|ENTPD1|IL16|PTPN1
Human Lung_Dauer05_137genes (15735721-Table3)	GeneSigDB	9	106	1.77513	1.31829	8.49057	1	5.48049	7.37895e-05	0.00253569	+*	BCL3|DUSP5|LYN|OAS1|PLAGL1|SP110|TMEM184B|TNFAIP8|UGCG
Human Bladder_Osman06_346genes_BladderVsTesticularVsKidney (16740760-TableS2b)	GeneSigDB	15	277	4.63025	2.1235	5.41516	1	4.88333	7.37769e-05	0.00253569	++	C9ORF91|CD44|CELF2|CHST2|EIF4G1|FAIM3|HSP90B1|IKZF1|LILRA2|MEX3C|NOSIP|PDCD4|SIK3|SP110|UBE2W
Human Bladder_Osman06_346genes_CancerVsControl (16740760-TableS2a)	GeneSigDB	15	277	4.63409	2.12329	5.41516	1	4.882	7.37769e-05	0.00253569	++	C9ORF91|CD44|CELF2|CHST2|EIF4G1|FAIM3|HSP90B1|IKZF1|LILRA2|MEX3C|NOSIP|PDCD4|SIK3|SP110|UBE2W
Human Bladder_Buytaert08_651genes (17952126-SuppTable2)	GeneSigDB	25	634	10.6067	3.18977	3.94322	1	4.51233	7.57682e-05	0.00259648	++	ADRB2|ANP32A|AP3M2|BCL2|CFLAR|CHST2|DLEU1|EML4|HK2|IVNS1ABP|MAP3K5|MAT2A|METTL13|PHTF1|PLCL2|SLC43A3|SUB1|TCEB3|TCTN3|TGFBR2|THYN1|TLE4|TRAM2|TSEN2|VOPP1
Tcell_cytokine_induced_prolif	SignatureDB	5	27	0.452514	0.666435	18.5185	1	6.8236	7.61318e-05	0.00260173	+*	MANF|MAT2A|MTHFD1|NOLC1|UCK2
Human Leukemia_Murati09_1686genes (18818702-SuppTable2)	GeneSigDB	37	1125	18.816	4.20152	3.28889	1	4.32796	7.65924e-05	0.00261026	++	ABHD10|ADAM8|ANP32A|BATF|C9ORF91|CD44|CD47|CD69|CHD2|CHML|CXORF21|CYB5R2|DCTD|FAM46C|GAB2|GNPTAB|HIST1H1C|HK2|IKZF1|IQGAP2|LITAF|LPIN2|MCOLN2|MOCOS|NFKBIZ|NGLY1|PCK2|PDE4B|PHACTR1|PTPLA|SCAPER|STAM|STAT3|TGIF1|TLK1|TYMS|ZADH2|EXCLUDED_GENES:|CCND2|ENTPD1
RODWELL_AGING_KIDNEY_UP	MSigDB_C2	21	485	8.11128	2.7956	4.3299	1	4.61036	7.82013e-05	0.00265777	++/*+	ADAM8|C19ORF10|C1ORF186|C7ORF23|CD47|CD69|CELF2|GMFG|IGHM|IKZF1|IL10RA|KIAA0226L|KLF8|LYN|MPEG1|NFKBIZ|RAC2|RNASE6|TESC|TRAFD1|VOPP1|EXCLUDED_GENES:|CCND2
TONKS_TARGETS_OF_RUNX1_RUNX1T1_FUSION_HSC_DN	MSigDB_C2	12	187	3.1289	1.74509	6.41711	1	5.08347	7.85221e-05	0.00266136	++/++	CCR7|CFLAR|CKAP4|GPR183|IL10RA|P2RX5|PDLIM1|PLAC8|SLA|SLC43A3|TESC|XK
BENPORATH_ES_1	MSigDB_C2	18	379	6.34047	2.47392	4.74934	1	4.71298	7.97318e-05	0.00269498	+*	ABCE1|AEN|AKIRIN1|CHST7|COCH|DNMT3A|GNL3|GNPTAB|MAT2A|MCM2|MTHFD1|NOC3L|NOLC1|PAK1|PIM2|POLR3G|PTPN2|RNF138
Human Lymphoma_Armstrong02_100genes_UnderExpressed (11731795-SuppTable1)	GeneSigDB	8	84	1.40339	1.17427	9.52381	1	5.61764	8.22971e-05	0.00277411	++	CD200|DBN1|FNBP1L|GAB1|MAN1A1|PION|PRKCB|TCF4|EXCLUDED_GENES:|CCND2
BOYAULT_LIVER_CANCER_SUBCLASS_G3_UP	MSigDB_C2	12	188	3.1431	1.75208	6.38298	1	5.05508	8.26337e-05	0.00277788	+*/*+	CCDC86|CYB5B|EBNA1BP2|EML4|FNBP1L|GNL3|MARCKS|SUB1|TBL1XR1|TGIF1|UCK2|UGCG
REGULATION_OF_METABOLIC_PROCESS	MSigDB_C5	29	796	13.3192	3.56261	3.64322	1	4.4015	8.33711e-05	0.00279508	+*	ARNT2|BCL3|CARD11|CHD1|CHD2|CNBP|CSDA|GCLC|IL10|IL12A|LIMD1|LITAF|LYN|PDCD4|PLAGL1|POLR3G|SMARCA2|SMARCC1|SP100|SPIB|STAT3|SUB1|TCEB3|TCF4|TGIF1|TLE1|TLK1|ZBTB32|ZMYND11|EXCLUDED_GENES:|CCND2|IRF4
BYSTROEM_CORRELATED_WITH_IL5_DN	MSigDB_C2	7	63	1.05239	1.01648	11.1111	1	5.85118	8.59509e-05	0.00287378	**/+*	BCL2|CD44|EIF4G1|IKZF1|MAPKAPK2|PTPRJ|SLA|EXCLUDED_GENES:|PIM1
Human Leukemia_Puigdecanet08_48genes (18480837-SuppTable2)	GeneSigDB	6	44	0.735225	0.849021	13.6364	1	6.201	8.70477e-05	0.00287932	++	BATF|CD44|KIAA0226L|NDUFV2|P2RX5|UGCG|EXCLUDED_GENES:|PIM1
IL2_UP.V1_UP	MSigDB_C6	12	189	3.16051	1.75514	6.34921	1	5.03635	8.69293e-05	0.00287932	+*/+*	AP3M2|C10ORF2|C11ORF80|CD69|HK2|IL10|KCNA3|PIM2|PMM2|POLR3G|TNFAIP8|ZBTB32|EXCLUDED_GENES:|PIM1
IL15_UP.V1_UP	MSigDB_C6	12	189	3.1599	1.75561	6.34921	1	5.03535	8.69293e-05	0.00287932	+*/*+	AP3M2|C10ORF2|CD69|HK2|IL10|PIM2|PMM2|POLR3G|SLAMF7|TNFAIP8|ZBTB32|ZNF614|EXCLUDED_GENES:|PIM1
PROTEIN_KINASE_ACTIVITY	MSigDB_C5	15	281	4.69778	2.14054	5.33808	1	4.8129	8.66073e-05	0.00287932	++	CDKL1|CSNK1E|ERN1|LYN|MAP3K5|MAPKAPK2|OXSR1|PAK1|PAK2|PIM2|PLK3|PRKCB|SIK3|TGFBR2|TLK1|EXCLUDED_GENES:|PIM1
IVANOVA_HEMATOPOIESIS_STEM_CELL	MSigDB_C2	14	250	4.17947	2.01705	5.6	1	4.86876	8.93855e-05	0.00294877	++	ARNT2|C16ORF5|DNMT3A|DUSP5|HOOK1|IQGAP2|PDE4B|S1PR1|SLC25A30|SMARCA2|TCF4|TRAFD1|UBA5|ULK2
Human Lymphoma_Karube06_17genes (16291580-Table2a)	GeneSigDB	4	15	0.250329	0.496069	26.6667	1	7.55877	9.09599e-05	0.00298745	+*	CCL22|CCR7|IL10RA|IL2RA
BASAKI_YBX1_TARGETS_DN	MSigDB_C2	18	383	6.40846	2.4937	4.69974	1	4.64833	9.10409e-05	0.00298745	**/++	ACSM3|CCDC50|CDK12|CLINT1|DHRS13|DUSP5|HK2|IRF2BP2|LMAN1|MTDH|NFKBIZ|PDCD4|PNP|SMARCA2|SMCHD1|ST6GALNAC4|TM2D3|ZNF614
TRANSFERASE_ACTIVITY_TRANSFERRING_PHOSPHORUS_CONTAINING_GROUPS	MSigDB_C5	19	419	7.00848	2.60289	4.53461	1	4.607	9.36168e-05	0.00306385	++	CDKL1|CSNK1E|ERN1|HK2|LYN|MAP3K5|MAPKAPK2|OXSR1|PAK1|PAK2|PCYT1A|PIM2|PLK3|POLR1C|POLR3G|PRKCB|SIK3|TGFBR2|TLK1|EXCLUDED_GENES:|PIM1
MODULE_3	MSigDB_C4	18	384	6.42027	2.49253	4.6875	1	4.64578	9.40803e-05	0.00307089	++	CD44|CYB5B|DBN1|GYG1|MCM2|MRPL3|MTHFD1|NOLC1|PLK3|PNP|RAC2|SEC13|TFRC|TGFBR2|TRAM2|TYMS|UCK2|UGCG
CAGGTG_V$E12_Q6	MSigDB_C3	66	2474	41.3753	6.05137	2.66774	1	4.06929	9.48961e-05	0.00308937	++	ADRB2|AFF3|AKIRIN1|ANP32A|ARHGAP24|ATXN7L1|BCL2|C7ORF23|CACNA1D|CCL22|CHD2|CHML|COL9A3|CSDA|DCAF17|DNMT3A|DUSP5|EHD1|EML4|ERN1|FA2H|FAIM3|FKBP11|FNBP1L|FNDC3A|GAB2|HIVEP1|HOOK1|HPDL|IGSF3|IQGAP2|IVNS1ABP|KIF13B|LEPREL1|LIMD1|MAN1A1|MAP3K5|METTL8|MYOCD|NETO2|NFKBID|P2RX5|PAK1|PAK2|PDE4B|PHF16|PIM2|POLR3G|PTPRJ|RAC2|RNF183|S1PR1|SCAMP2|SH2D3C|SIDT1|SLAMF7|SMARCA2|SPIB|ST3GAL5|TFRC|TLE1|TLE4|TOX2|UG…
IVANOVA_HEMATOPOIESIS_EARLY_PROGENITOR	MSigDB_C2	22	529	8.84646	2.91654	4.15879	1	4.50999	9.54063e-05	0.00309782	++	ABCE1|ALG3|BCL2|CCDC86|CD69|CHML|CHN2|CYB5B|DCTD|FAM108C1|FASTKD1|GNPTAB|LRRC33|MANF|MINA|MTHFD1|NOLC1|PAK1|SEC61A1|SMU1|STAM|UMPS
CAIRO_HEPATOBLASTOMA_CLASSES_UP	MSigDB_C2	24	605	10.1178	3.11501	3.96694	1	4.45654	9.60262e-05	0.00310979	+*/*+	ARID3A|B9D1|C10ORF2|CREB3L2|CSDA|DNMT3A|FASTKD1|GNL3|GPX7|IPO4|KIF14|MCM2|METTL8|MTDH|NOLC1|NT5DC2|PDCD11|PDCD4|POLR1C|RNF126|SMARCC1|TFRC|TOMM70A|U2SURP
Human Breast_Graham05_133genes (15976005-Table2)	GeneSigDB	9	110	1.83629	1.34181	8.18182	1	5.33886	9.84011e-05	0.00316187	+*	CD44|CKAP4|DUSP5|ELL2|MAN1A1|PIM2|PTPRJ|SMCHD1|USP46
Human Lypmhoma_Leval07_644genes (17284527-TableS1)	GeneSigDB	21	493	8.24236	2.81845	4.25963	1	4.52647	9.83197e-05	0.00316187	++	AFF3|AICDA|C1ORF186|CCL22|CCR10|CD200|CD69|CELF2|CHN2|COCH|CYB5R2|ELL2|EML4|EPHB1|FAM129C|FAM46C|IGSF3|IKZF1|PDE4B|SIK3|TFRC|EXCLUDED_GENES:|CCND2|ETV6
DANG_BOUND_BY_MYC	MSigDB_C2	36	1096	18.3352	4.14859	3.28467	1	4.25801	9.83881e-05	0.00316187	+*	ACPP|BCL3|CLINT1|CSDA|DLEU1|FECH|FTSJ1|GCLC|GNL3|HIST1H2AC|HSP90B1|IER5|IVNS1ABP|MANF|MAP3K5|MAT2A|METTL13|MINA|MIR155HG|MTHFD1|NFKBIB|PARP3|PCYT1A|PMM2|POLR3G|RAC2|SEC61B|SH2D3C|SLA|SPIB|ST6GALNAC4|TCEB3|TFRC|TYMS|U2SURP|XK|EXCLUDED_GENES:|CCND2|IRF4|PTPN1
Human Lymphoma_Chin09_67genes (19377508-Table2)	GeneSigDB	6	45	0.75241	0.859357	13.3333	1	6.10642	9.90353e-05	0.00317401	+*	BCL2|CCL22|CD44|MARCKS|MNDA|ZBTB32|EXCLUDED_GENES:|IRF4
AAGCAAT,MIR-137	MSigDB_C3	13	222	3.71179	1.90055	5.85586	1	4.88711	0.000101485	0.00324411	++	ANKRD12|BMPR2|C18ORF25|CSDA|FNBP1L|FNDC3A|MAPKAPK2|NABP1|PTPN2|RAVER2|RNF138|TLE4|ZMYND11|EXCLUDED_GENES:|SH3BP5
Human Leukemia_Boag07_100genes_pre-BALLvCD34_DN (17760805-SuppTableS2b)	GeneSigDB	8	87	1.45265	1.19393	9.1954	1	5.48388	0.000105613	0.00336736	+*	DLEU1|ENOSF1|MAP3K5|MINA|PARVB|PHACTR2|PLAGL1|RAP1GDS1
Tcell_cytokine_induced_PMBC_Bcell_induced	SignatureDB	5	29	0.484836	0.689748	17.2414	1	6.54611	0.000108953	0.00345469	++	BCL2|DUSP5|GPR183|IL2RA|MIR155HG|EXCLUDED_GENES:|CCND2|IRF4
Human Lymphoma_Rimsza08_36genes (18544678-Table2)	GeneSigDB	5	29	0.485502	0.691306	17.2414	1	6.53039	0.000108953	0.00345469	++	B4GALT1|BCL2|PDCD4|PDE4B|TLE1|EXCLUDED_GENES:|CCND2
STEIN_ESRRA_TARGETS	MSigDB_C2	22	534	8.92697	2.92917	4.11985	1	4.46305	0.000109189	0.00345469	++	CFLAR|DCTD|ECI1|EHHADH|FA2H|FASTKD1|HOOK1|IDH3A|IVNS1ABP|MANF|MARCH3|MARCKS|P2RX5|SMARCC1|ST3GAL5|ST6GALNAC4|TGFBR2|TMEM184B|TNFAIP8|TOMM70A|TRAM2|UCK2
Human Breast_Sabatier10_368genes (20490655-ST3)	GeneSigDB	17	354	5.92295	2.40098	4.80226	1	4.61355	0.000109553	0.00345735	++	ADAM8|ASPHD2|C11ORF80|CASP10|CSDA|GABPB1|GRWD1|GYG1|HIST1H2AC|LAG3|NOC3L|PARVB|PIM2|PLCL2|RILPL2|STAMBPL1|TRAFD1|EXCLUDED_GENES:|ETV6
GEORGES_TARGETS_OF_MIR192_AND_MIR215	MSigDB_C2	31	891	14.8971	3.75617	3.47924	1	4.28705	0.000109877	0.00345873	++	AP3M2|BCL2|BMPR2|C5ORF30|CHDH|CHML|CKAP4|COCH|ELL2|EPM2AIP1|GAB2|IL17RB|KIF14|LEPROTL1|LMAN1|MANF|MTDH|NFKBIZ|PHTF1|SLC19A2|SLC25A30|SMARCA2|STAM|STAMBPL1|TCEB3|TOR1AIP1|UBE2W|VASH2|XK|ZADH2|ZMYND11|EXCLUDED_GENES:|PIM1
JAATINEN_HEMATOPOIETIC_STEM_CELL_DN	MSigDB_C2	13	224	3.7473	1.91176	5.80357	1	4.83988	0.000111032	0.00348622	++/++	ADTRP|BPGM|CCR7|FAM46C|HCK|IL10RA|LBH|MNDA|MPEG1|PLBD1|PNP|TESC|XK
HOXA9_DN.V1_DN	MSigDB_C6	12	194	3.2403	1.77764	6.18557	1	4.9277	0.000111412	0.0034893	+*/++	ACPP|COCH|COL9A3|FZD6|LMAN1|PARVB|PLAGL1|PTPLA|STAM|TBL1XR1|UBE2E3|XK
Human Kidney_Yamakazi03_68genes (12584564-Table1)	GeneSigDB	6	46	0.769461	0.868835	13.0435	1	6.02018	0.000112299	0.00349937	+*	BPGM|CD37|IDH3A|KIF13B|PARVB|PLCL2
Human Lung_not_cancer_Temple01_57genes (11694447-Figure4b)	GeneSigDB	6	46	0.768637	0.86902	13.0435	1	6.01985	0.000112299	0.00349937	+*	ACSM3|DUSP5|FECH|MANF|PDCD4|PIM2|EXCLUDED_GENES:|PIM1|PTPN1
E2F3_overexpression_2x_up	SignatureDB	10	138	2.30946	1.50087	7.24638	1	5.12405	0.000113517	0.00352843	+*	CHML|CHST2|CHST7|IL17RB|NETO2|PKN3|PLCL2|RAVER2|TSHZ1|ZNF275
SCGGAAGY_V$ELK1_02	MSigDB_C3	38	1193	19.9566	4.32064	3.18525	1	4.17609	0.000118361	0.00366979	+-	AP3B1|ARMC7|C10ORF2|CLINT1|CNPY3|CSNK1E|CTR9|EBNA1BP2|GRWD1|IPO4|KCTD5|LEPROTL1|LIMD1|MAPKAPK2|MRPL3|NFKBIB|NOSIP|PARL|PCYT1A|PDLIM1|PHTF1|PKN3|PMM2|POLR1C|PTPN2|SCAMP2|SEC13|SEC61A1|SIDT1|SMC6|SMU1|SPATA5|SUSD1|TLK1|TOMM70A|UBA5|UBE2E3|ZBTB11|EXCLUDED_GENES:|CCND2|FUT8|PTPN1
GEISS_RESPONSE_TO_DSRNA_DN	MSigDB_C2	4	16	0.267015	0.512149	25	1	7.28887	0.000119682	0.00369223	+*/+*	DNMT3A|PCK2|STAM|TOMM70A
Human Lymphoma_Guedez05_17genes (15479729-Table2)	GeneSigDB	4	16	0.267307	0.512217	25	1	7.28733	0.000119682	0.00369223	+*	BATF|STAT3|SUB1|TCF4
Human Leukemia_Haslinger04_126genes (15459216-TableA2f)	GeneSigDB	9	113	1.8904	1.36181	7.9646	1	5.22069	0.000121082	0.00372312	++	CKAP4|CTR9|DCTD|GAB2|GPX7|HSP90B1|IGSF3|NEK3|RASGRF1
WANG_CISPLATIN_RESPONSE_AND_XPC_DN	MSigDB_C2	13	226	3.78341	1.9188	5.75221	1	4.80332	0.000121344	0.00372312	+*/++	BPGM|CNPY3|CNTNAP1|CSDA|EHHADH|LPCAT4|PARP4|PDLIM1|PNP|RAC2|SP100|TGIF1|TLK1
BENPORATH_MYC_MAX_TARGETS	MSigDB_C2	28	773	12.9276	3.51154	3.62225	1	4.29226	0.000121586	0.00372312	+*	ABCE1|CSDA|DLEU1|FKBP11|FTSJ1|GCLC|HIST1H2AC|HSP90B1|IER5|IVNS1ABP|MANF|MAP3K5|MAT2A|METTL13|MTHFD1|NFKBIB|PCYT1A|PMM2|POLR1C|POLR3G|RAC2|RRP9|SEC61B|SH2D3C|SPIB|ST6GALNAC4|TCEB3|XK|EXCLUDED_GENES:|PTPN1
LTE2_UP.V1_DN	MSigDB_C6	12	196	3.2794	1.7872	6.12245	1	4.87946	0.000122744	0.00374008	++/++	BCL2|CHD1|COL9A3|HIST1H2AC|MOCOS|OAS1|SOGA2|SP100|SP110|UGCG|XK|ZNF107
Human Viral_Cairo08_982genes (19061838-TableS7)	GeneSigDB	29	814	13.6136	3.59701	3.56265	1	4.27754	0.000122467	0.00374008	+*	ARID3A|B9D1|C10ORF2|CREB3L2|CSDA|DNMT3A|FASTKD1|GNL3|GPX7|IPO4|KIF14|MAP3K5|MCM2|METTL8|MTDH|NOLC1|NT5DC2|PDCD11|PDCD4|PEBP1|POLR1C|RASGRF1|RNF126|SLC27A5|SMARCC1|ST3GAL5|TFRC|TOMM70A|U2SURP|EXCLUDED_GENES:|BLNK
AACTTT_UNKNOWN	MSigDB_C3	53	1876	31.3849	5.3466	2.82516	1	4.04277	0.000124476	0.00378352	++	ADAMTS6|ADRB2|AFF3|ANP32A|ANXA11|ARID3B|ATXN7L1|BMPR2|BTLA|C5ORF30|C6ORF106|C7ORF23|CACNA1D|CD69|CDK12|CDYL|CHD2|CHN2|CREB3L2|DNMT3A|EIF4G1|EPHB1|GMPPB|GPR183|HOOK1|IL10|IPO4|IQGAP2|KLF8|MANF|MARCH3|NETO2|NFKBID|P2RY10|PCK2|PDE4B|PHF16|PIAS2|PLAGL1|RAB30|RILPL2|SIDT1|SLC2A13|SMARCA2|SPIB|STAT3|TCF4|TGIF1|TLE1|TLE4|TLK1|TOX2|USP46|EXCLUDED_GENES:|BMF|ETV6|IL16|SH3BP5
Myeloma_HY_subgroup_UP	SignatureDB	6	47	0.786563	0.878112	12.766	1	5.9371	0.000126934	0.00383937	+*/*+	ELOVL7|EPHB1|LAG3|PAK1|SCAPER|SIDT1
Human Breast_Pothuri10_811genes (20436685-ST4-1)	GeneSigDB	28	775	12.9585	3.51207	3.6129	1	4.28279	0.000126934	0.00383937	++	ABCE1|ACSM3|ANP32A|ANXA11|C5ORF30|C5ORF45|CASP10|CCL18|CD44|CLINT1|DLEU1|ERP29|FNDC3A|GAB1|GCLC|GPR183|IPO4|KIF13B|LILRB2|LSG1|MARCH3|PAK2|S1PR1|SIDT1|SLC33A1|SP110|TYMS|USP46|EXCLUDED_GENES:|FUT8
Tcell_PIind_CsAdown4x	SignatureDB	7	67	1.12147	1.04852	10.4478	1	5.60651	0.000127581	0.00384953	+*	CD200|CFLAR|ELL2|IL10|MAPKAPK2|SLA|TFRC|EXCLUDED_GENES:|IRF4
ERB2_UP.V1_DN	MSigDB_C6	12	197	3.29277	1.79269	6.09137	1	4.85709	0.000128772	0.00387601	*+/++	ANKRD12|BCL2|CHD1|COL9A3|FASTKD1|NOC3L|OAS1|RNF138|SOGA2|XK|ZBTB11|ZNF107
PUJANA_CHEK2_PCC_NETWORK	MSigDB_C2	28	776	12.9828	3.51573	3.60825	1	4.27145	0.000129686	0.00389405	+*	ABCE1|ATP13A3|C7ORF23|CD47|CNBP|CTR9|DLEU1|FTSJ1|GTF3A|HK2|KIF14|MAT2A|MCM2|MRPL3|MTDH|NDUFV2|NOLC1|OXSR1|PIAS2|POLR3G|PTPN2|PTPRJ|RNF126|SMARCC1|SP100|TFRC|TYMS|UCK2|EXCLUDED_GENES:|IRF4
Human Breast_Charafe-Jauffret06_1309genes (16288205-GeneTable3)	GeneSigDB	31	901	15.0735	3.78174	3.44062	1	4.21142	0.000134042	0.00401511	++	BBIP1|BSPRY|C11ORF80|C9ORF91|CACNA1D|CCDC50|CD44|CHD2|CHN2|CHST2|DDI2|DHRS13|DOCK10|ERP29|FA2H|FAM46C|HOOK1|LEPREL1|LYN|PCK2|PDCD4|PTPLA|SACS|SCAMP2|SIDT1|SOGA2|STAMBPL1|TGFBR2|TOX2|TRAM2|TYMS|EXCLUDED_GENES:|BLNK|PIM1
Human StemCell_Hao09_359genes (20077526-TableS4)	GeneSigDB	14	260	4.35128	2.05597	5.38462	1	4.69302	0.00013514	0.00403819	++	ACSM3|CYB5B|FAM100B|GPM6A|HK2|IQGAP2|LYN|MAN1A1|MARCKS|MOCOS|NABP1|SMARCA2|TBL1XR1|TLE1
WELCSH_BRCA1_TARGETS_DN	MSigDB_C2	10	141	2.35873	1.51729	7.0922	1	5.03612	0.000135646	0.00404357	*+/+*	ALG3|ANXA11|CKAP4|EIF4G1|HSP90B1|MANF|MCM2|MTHFD1|NOLC1|PDCD11
Mouse Lymphoma_Wu08_1777genes (18535662-TableS2a)	GeneSigDB	31	902	15.0892	3.78354	3.43681	1	4.20527	0.000136704	0.0040653	++	ANKRD12|AP3M2|ATP1B3|CD200|CLINT1|CREB3L2|DBN1|ERN1|FECH|FNDC3A|GMPPB|HIST1H1C|LEPROTL1|LITAF|LMAN1|LYN|MAT2A|NETO2|PAK2|PCK2|PDCD4|PLAGL1|PPIB|RDX|RILPL2|S1PR1|STAM|TGFBR2|TMEM184B|TRAFD1|WDFY1|EXCLUDED_GENES:|CCND2
Human Lymphoma_Shin07_76genes (17638852-Table6)	GeneSigDB	7	68	1.13736	1.05528	10.2941	1	5.55552	0.000140201	0.00415931	+*	CCR7|DUSP5|IL10|LAG3|LILRA3|OAS1|PIM2|EXCLUDED_GENES:|CCND2
FAELT_B_CLL_WITH_VH_REARRANGEMENTS_DN	MSigDB_C2	6	48	0.803027	0.887148	12.5	1	5.85807	0.000143041	0.00421324	**/+*	ADTRP|GLO1|GTF3A|PARP4|PLCL2|ZMYND11
ZHAN_MULTIPLE_MYELOMA_HP_UP	MSigDB_C2	6	48	0.802857	0.887518	12.5	1	5.85582	0.000143041	0.00421324	+*/*+	ELOVL7|EPHB1|LAG3|PAK1|SCAPER|SIDT1
MOLECULAR_ADAPTOR_ACTIVITY	MSigDB_C5	6	48	0.803223	0.887817	12.5	1	5.85343	0.000143041	0.00421324	+*	CHN2|CNTNAP1|GAB1|SH2D3C|SLA|STAM|EXCLUDED_GENES:|BLNK
YAO_TEMPORAL_RESPONSE_TO_PROGESTERONE_CLUSTER_14	MSigDB_C2	10	142	2.37467	1.523	7.04225	1	5.00679	0.000143788	0.00421936	+*	C19ORF10|CSDA|EBNA1BP2|EIF4G1|FKBP11|IPO4|SEC13|SEC61A1|SEC61B|TOMM70A
MTOR_UP.V1_UP	MSigDB_C6	11	170	2.84174	1.66544	6.47059	1	4.89856	0.000143931	0.00421936	+*/*+	ATXN7L1|CCDC86|ERN1|IDH3A|MINA|MTHFD1|NABP1|SELRC1|SP100|TESC|TFRC
Human Breast_Reyal05_3373genesSuppTable2SuppTable2 (15735024-SuppTable2)	GeneSigDB	80	3205	53.612	6.77566	2.4961	1	3.89453	0.000144359	0.00422189	+*	ABCE1|ALG3|ANKRD12|ANP32A|AP3M2|ARHGAP17|ARMC7|BSPRY|C18ORF25|C19ORF10|C5ORF30|C6ORF106|CABLES1|CD69|CDK12|CDYL|CHD1|CHML|CKAP4|CSNK1E|CTR9|DBN1|DHRS13|EBNA1BP2|ECI1|EHD1|EIF4G1|EPM2AIP1|ERP29|FAIM3|FNBP1L|FNDC3A|FZD6|GAB1|GAB2|GNL3|GTF3A|HEATR6|HIST1H1C|IPO4|IRF2BP2|KCTD5|KIF13B|KIF14|LEPROTL1|LMAN1|MAPKAPK2|MARCKS|METTL8|MSRB1|MTDH|NEK3|OAS1|PAK1|PAK2|PARP3|PCK2|PEBP1|PMM2|POLR1C|PTPN2|RAB7L1|R…
FLECHNER_BIOPSY_KIDNEY_TRANSPLANT_REJECTED_VS_OK_DN	MSigDB_C2	22	545	9.11285	2.96045	4.0367	1	4.3531	0.000145907	0.00425711	+*/++	ACPP|ACSM3|CLINT1|CREB3L2|DLEU1|EBNA1BP2|ECI1|EHHADH|ENOSF1|FECH|FNBP1L|FNDC3A|GCDH|IGSF3|PCK2|PEBP1|PNP|RAB7L1|RDX|TOMM70A|UBE2E3|ZMYND11
LU_EZH2_TARGETS_DN	MSigDB_C2	18	398	6.65942	2.53708	4.52261	1	4.46993	0.000147062	0.0042807	*+/++	BMPR2|CNTNAP1|CTR9|ELL2|HK2|IGSF3|IL10|LEPREL1|LITAF|NABP1|NFKBIZ|NIPA2|PHF16|STAMBPL1|TGFBR2|TSEN2|UBE2E3|ZNF614
PHOSPHOTRANSFERASE_ACTIVITY_ALCOHOL_GROUP_AS_ACCEPTOR	MSigDB_C5	16	329	5.5043	2.30946	4.86322	1	4.54466	0.000150168	0.00436088	++	CDKL1|CSNK1E|ERN1|HK2|LYN|MAP3K5|MAPKAPK2|OXSR1|PAK1|PAK2|PIM2|PLK3|PRKCB|SIK3|TGFBR2|TLK1|EXCLUDED_GENES:|PIM1
Human ProteinKinases_Frevel03_425genes (12509443-Table2)	GeneSigDB	18	399	6.67233	2.54171	4.51128	1	4.4567	0.000151692	0.00439481	++	ABCE1|AP3M2|C7ORF23|EHHADH|FAIM3|FNDC3A|GABPB1|GLO1|IDH3A|IL10|IL10RA|LEPROTL1|LMAN1|OXSR1|PDE4B|PHACTR2|PLK3|UGCG|EXCLUDED_GENES:|PTPN1
MORI_EMU_MYC_LYMPHOMA_BY_ONSET_TIME_DN	MSigDB_C2	4	17	0.284629	0.528102	23.5294	1	7.03533	0.000154446	0.00446415	**/+*	CREB3L2|HSP90B1|NFKBIZ|SLA
Human Breast_Cicatiello04_344genes (15171711-Table1)	GeneSigDB	16	330	5.51937	2.31595	4.84848	1	4.52541	0.000155455	0.00448284	+*	ABCE1|ADTRP|CD44|GTF3A|HSP90B1|ITGAE|MCM2|MRPL3|MTHFD1|NOLC1|PCK2|PNP|PPIB|SEC61B|UCK2|UMPS
XBP1_target_secretory	SignatureDB	6	49	0.819485	0.896051	12.2449	1	5.78149	0.000160724	0.00461326	+*	HSP90B1|LMAN1|PPIB|SEC61A1|SLC33A1|ST6GALNAC4
YAGI_AML_WITH_T_8_21_TRANSLOCATION	MSigDB_C2	17	366	6.12108	2.43658	4.64481	1	4.46482	0.000163123	0.00467071	++	ACSM3|AP3B1|CD200|CLINT1|ECI1|ENOSF1|GLO1|LEPROTL1|MAN1A1|MANF|OXSR1|PEBP1|PLAGL1|SACS|SLA|TGIF1|VOPP1|EXCLUDED_GENES:|ETV6
Human Liver_Chao09_1031genes (18787218-tableS1)	GeneSigDB	26	706	11.8148	3.36029	3.68272	1	4.22143	0.00016348	0.00467071	++	ADTRP|AFF3|ARHGAP17|ARNT2|CCDC113|CHML|CHST2|CYB5R2|FKBP11|IVNS1ABP|LITAF|MAN1A1|MARCKS|MLKL|NEK3|NFKBIZ|P2RX5|PDCD4|SNX18|SOGA2|TLE1|TRAM2|TSHZ1|TYMS|XK|ZADH2|EXCLUDED_GENES:|FOXP1
GNF2_CARD15	MSigDB_C4	7	70	1.17002	1.07104	10	1	5.44329	0.000168479	0.00476603	+*	HCK|LILRA2|LILRA3|LILRA6|LILRB2|MNDA|PLBD1
Human Breast_Desmedt08_95genes_STAT1_Module (18698033-tableS1-STAT1)	GeneSigDB	8	93	1.55635	1.2344	8.60215	1	5.22006	0.000168743	0.00476603	+*	CD69|GPR183|LAG3|LILRA4|P2RX5|PIM2|PLAC8|SP140
ANTI_APOPTOSIS	MSigDB_C5	9	118	1.97299	1.38765	7.62712	1	5.06396	0.000168546	0.00476603	+*	AVEN|BCL2|BCL2L10|CFLAR|FAIM3|GCLC|GLO1|HSP90B1|TNFAIP8
TAKEDA_TARGETS_OF_NUP98_HOXA9_FUSION_16D_UP	MSigDB_C2	11	173	2.89531	1.68121	6.35838	1	4.82075	0.00016786	0.00476603	++/**	AFF3|ASPHD2|BTLA|CHST2|CLECL1|GPX7|IKZF1|LBH|MCOLN2|PDLIM1|SLAMF7|EXCLUDED_GENES:|IRF4
NAKAMURA_TUMOR_ZONE_PERIPHERAL_VS_CENTRAL_DN	MSigDB_C2	24	628	10.5029	3.17261	3.82166	1	4.25427	0.00016836	0.00476603	*+/++	ARNT2|BCL3|CHST2|CREB3L2|DHRS13|ENOSF1|EPM2AIP1|FA2H|FAM108C1|FNDC3A|HIST1H2AC|HK2|IGSF3|LITAF|NABP1|OAS1|PDCD4|PDE4B|PLAGL1|RAC2|SLC33A1|TESC|UGCG|WDR11
KUMAR_TARGETS_OF_MLL_AF9_FUSION	MSigDB_C2	18	403	6.74331	2.55427	4.4665	1	4.40702	0.000171518	0.00483338	++	ATP1B3|C16ORF5|ELL2|HK2|IGHM|LOC645638|LSG1|MARCKS|MCOLN2|MOCOS|MTDH|NABP1|PDLIM1|PIM2|PLBD1|S1PR1|SPIB|ST6GALNAC4|EXCLUDED_GENES:|BLNK|IRF4
Mouse Lymphoma_Wu08_1167genes (18535662-TableS2d)	GeneSigDB	24	629	10.5191	3.17671	3.81558	1	4.24366	0.000172387	0.00484682	+-	ABCE1|ATP1B3|BCL2L10|CNBP|CSDA|CYB5B|EBNA1BP2|EML4|IDH3A|IL10RA|MAT2A|MCM2|MTHFD1|NOLC1|NT5DC2|PDCD11|POLR1C|PPIB|SMARCC1|SMC6|TFRC|TOMM70A|UCK2|UMPS
Mouse Breast_Astolfi05_1104genes_TumorGenes (15793299-TableC)	GeneSigDB	30	873	14.6026	3.72374	3.43643	1	4.13494	0.000175439	0.00492143	++	ANP32A|CCDC50|CCR7|CD200|CD37|CD44|CD47|CELF2|COL9A3|CYB5B|ECI1|EHHADH|EIF4G1|FKBP11|GPD2|GPX7|GYG1|HK2|IGHM|LITAF|MANF|MCOLN2|PLBD1|PTPN2|RAC2|SLC38A2|SMARCC1|ST3GAL5|TFRC|TGIF1|EXCLUDED_GENES:|FUT8|IL16|IRF4
Human Breast_Bertucci06_534genes (16651414-Supp3)	GeneSigDB	17	369	6.1673	2.44287	4.60705	1	4.43442	0.000179649	0.00502815	++	ADAM8|ASPHD2|C11ORF80|CASP10|CSDA|GABPB1|GRWD1|GYG1|HIST1H2AC|LAG3|NOC3L|PARVB|PIM2|PLCL2|RILPL2|STAMBPL1|TRAFD1|EXCLUDED_GENES:|ETV6
GARCIA_TARGETS_OF_FLI1_AND_DAX1_DN	MSigDB_C2	11	175	2.92536	1.69077	6.28571	1	4.77572	0.000185622	0.00518358	**/+*	ARHGAP17|CYB5B|GABPB1|HPDL|ITGAE|NOLC1|RRP9|SLC43A3|SPATA5|STAMBPL1|TYMS
RESPONSE_TO_BIOTIC_STIMULUS	MSigDB_C5	9	120	2.00765	1.39922	7.5	1	4.99734	0.000191441	0.00531013	+*	ABCE1|BCL2|BCL3|CCL18|CCL22|ERN1|IL10|IL12A|IVNS1ABP
Mouse Leukemia_Powell09_138genes (19805619-TableS3)	GeneSigDB	9	120	2.00543	1.40095	7.5	1	4.99274	0.000191441	0.00531013	+*	ADAM8|CNBP|FNDC3A|IL10|IL10RA|MAT2A|NABP1|PIM2|PNP
IRF4_myeloma_induced_Lymphochip	SignatureDB	9	120	2.00731	1.40084	7.5	1	4.99178	0.000191441	0.00531013	+*	BCL2|CTR9|DUSP5|ELL2|HSP90B1|PIM2|SLAMF7|SUB1|UCK2|EXCLUDED_GENES:|IRF4
DEFENSE_RESPONSE	MSigDB_C5	14	269	4.50291	2.09161	5.20446	1	4.54056	0.000192426	0.00532552	+*	BCL2|CCL22|CCR7|CHST2|FAIM3|IL12A|IL17RB|LILRA2|LILRA3|LILRB2|MNDA|PARP4|RNASE6|SP140|EXCLUDED_GENES:|BLNK
Human Bone_Heller08_28genes (18172295-Table1)	GeneSigDB	4	18	0.2998	0.542655	22.2222	1	6.8187	0.000195961	0.00538717	+*	BCL2|BCL3|PIM2|TMEM184B|EXCLUDED_GENES:|CCND2
AMUNDSON_POOR_SURVIVAL_AFTER_GAMMA_RADIATION_8G	MSigDB_C2	8	95	1.58752	1.24743	8.42105	1	5.14056	0.000195653	0.00538717	++	CD44|CKAP4|ENOSF1|GMFG|GTF3A|IGSF3|RDX|ULK2
RAMALHO_STEMNESS_UP	MSigDB_C2	12	206	3.44684	1.83339	5.82524	1	4.66522	0.000195436	0.00538717	+*/**	CHD1|FKBP11|GAB1|GLO1|GRWD1|LSG1|MRPL3|PTPN2|RNF138|SLC38A2|STAM|UMPS
SMID_BREAST_CANCER_LUMINAL_B_DN	MSigDB_C2	22	557	9.31153	2.98876	3.94973	1	4.2454	0.000198074	0.00543319	*+/++	CCL18|CCR7|CD37|CD69|CHST7|COL9A3|CSDA|GPR183|IGHM|IKZF1|LILRA4|LYN|P2RX5|PLAC8|PLAGL1|PRKCB|PTPLA|RAC2|SLC43A3|SPIB|TNFAIP8|UBE2E3
Mouse Breast_Stein09_1780genes (19408105-SuppTable4)	GeneSigDB	21	519	8.67971	2.89003	4.04624	1	4.26304	0.000199058	0.00544812	++	ABCE1|ANXA11|ATP1B3|B4GALT1|CYB5B|GAB1|GCDH|GMFG|GYG1|HSP90B1|IGHM|LITAF|LMAN1|MAPKAPK2|PDCD4|PDLIM1|SEC61B|STAT3|TCF4|TFRC|TGIF1
Human Lung_Olejniczak07_36genes (17426248-TableS2a)	GeneSigDB	5	33	0.552332	0.736904	15.1515	1	6.03561	0.000206108	0.00561623	+*	BCL2|FECH|LILRA3|LILRA4|LMAN1
Human Leukemia_Shah08_34genes (18477771-Table1)	GeneSigDB	5	33	0.553508	0.737357	15.1515	1	6.03031	0.000206108	0.00561623	+*	BCL2|FAIM3|LITAF|PDCD4|TNFAIP8
V$NMYC_01	MSigDB_C3	14	271	4.53155	2.09816	5.16605	1	4.51275	0.000207677	0.00564653	+*	AEN|BCL2|CACNA1D|DNMT3A|EIF4G1|IPO4|IQGAP2|LPCAT4|MTHFD1|PLAGL1|RAB30|SLC38A5|STAT3|TET2
KIM_MYC_AMPLIFICATION_TARGETS_DN	MSigDB_C2	8	96	1.60591	1.25441	8.33333	1	5.09728	0.000210373	0.00568247	+*/++	BCL2|CFLAR|ELOVL7|FNBP1L|GAB2|IL17RB|KIF13B|PLEKHG1|EXCLUDED_GENES:|ETV6
VANTVEER_BREAST_CANCER_ESR1_DN	MSigDB_C2	13	239	3.99936	1.9747	5.43933	1	4.55799	0.000210748	0.00568247	*+/+*	ATP1B3|CCL18|CHST2|CREB3L2|CYB5R2|EML4|LYN|PHACTR2|PLEKHG1|RDX|SLC43A3|UBE2E3|UCK2|EXCLUDED_GENES:|PIM1
REGULATION_OF_APOPTOSIS	MSigDB_C5	16	339	5.67052	2.3479	4.71976	1	4.39946	0.000210816	0.00568247	+*	AVEN|BCL2|BCL2L10|BCL3|C16ORF5|CASP10|CFLAR|ERN1|FAIM3|GCLC|GLO1|HSP90B1|IL12A|MAP3K5|PLAGL1|TNFAIP8|EXCLUDED_GENES:|PIM1
CTTTAAR_UNKNOWN	MSigDB_C3	32	967	16.1737	3.90635	3.3092	1	4.05142	0.000210836	0.00568247	++	ADAMTS6|AFF3|ARID3B|B4GALT1|CACNA1D|CCR7|CHD2|CSDA|EML4|GCDH|GPM6A|HIVEP1|IDH3A|IER5|IVNS1ABP|KCNA3|KLF8|LEPREL1|NFKBIZ|NIPA2|NOSIP|PHF16|SIK3|SLC2A13|SMC6|TCEB3|TCF4|TGIF1|TMEM184B|TOX2|TSHZ1|XK|EXCLUDED_GENES:|ETV6|FUT8
NEGATIVE_REGULATION_OF_APOPTOSIS	MSigDB_C5	10	149	2.49318	1.56133	6.71141	1	4.80796	0.000213148	0.00570999	+*	AVEN|BCL2|BCL2L10|BCL3|CFLAR|FAIM3|GCLC|GLO1|HSP90B1|TNFAIP8|EXCLUDED_GENES:|PIM1
Human StemCell_Meijden02_222genes (12036939-Table3)	GeneSigDB	12	208	3.47612	1.84236	5.76923	1	4.62661	0.000213703	0.00570999	+*	COPB2|DBN1|DUSP5|GTF3A|GYG1|KIF14|MCM2|MTHFD1|PAK1|PCK2|TGIF1|TLE4
BORCZUK_MALIGNANT_MESOTHELIOMA_UP	MSigDB_C2	15	305	5.10225	2.22572	4.91803	1	4.447	0.000212644	0.00570999	++/+*	AP3B1|C5ORF30|DBN1|FTSJ1|FZD6|GLO1|MAPKAPK2|MRPL3|PAK2|PARVB|RAP1GDS1|SMARCC1|STAT3|UBE2E3|ZMYND11
REGULATION_OF_PROGRAMMED_CELL_DEATH	MSigDB_C5	16	340	5.68417	2.35123	4.70588	1	4.38742	0.000217913	0.00580993	+*	AVEN|BCL2|BCL2L10|BCL3|C16ORF5|CASP10|CFLAR|ERN1|FAIM3|GCLC|GLO1|HSP90B1|IL12A|MAP3K5|PLAGL1|TNFAIP8|EXCLUDED_GENES:|PIM1
DOUGLAS_BMI1_TARGETS_UP	MSigDB_C2	22	561	9.3859	3.00284	3.92157	1	4.20072	0.0002188	0.00582103	++/++	AEN|ARHGAP17|ATP13A3|C9ORF91|CABLES1|CYB5B|FTSJ1|GLO1|GTF3A|HK2|IDH3A|NT5DC2|P2RX5|PIAS2|PNP|RDX|TMEM184B|TRAM2|TUBB4A|UGCG|VOPP1|WDFY1|EXCLUDED_GENES:|SH3BP5
NEGATIVE_REGULATION_OF_PROGRAMMED_CELL_DEATH	MSigDB_C5	10	150	2.50941	1.56612	6.66667	1	4.78289	0.000225035	0.00596125	+*	AVEN|BCL2|BCL2L10|BCL3|CFLAR|FAIM3|GCLC|GLO1|HSP90B1|TNFAIP8|EXCLUDED_GENES:|PIM1
Human Leukemia_Bomben10_212genes (20068100-TableS5)	GeneSigDB	10	150	2.50998	1.56605	6.66667	1	4.78274	0.000225035	0.00596125	+*	AKIRIN1|AP3M2|HSP90B1|LAG3|PDCD4|SELRC1|SLC27A5|SLC38A2|TBL1XR1|UBE2W
FORTSCHEGGER_PHF8_TARGETS_UP	MSigDB_C2	14	274	4.58115	2.10886	5.10949	1	4.46632	0.000232502	0.0061459	+*/++	ACPP|CHML|DCAF17|FNBP1L|GABPB1|GCLC|IVNS1ABP|MAN1A1|PCK2|PIAS2|PTPN2|PTPRJ|SLC19A2|TGFBR2
SANSOM_APC_TARGETS	MSigDB_C2	12	210	3.51054	1.84955	5.71429	1	4.59001	0.000233407	0.00615666	+*	ABCE1|C16ORF88|CCDC86|CD44|DCTD|FZD6|LPCAT4|METTL13|NABP1|TRIT1|TSEN2|TYMS|EXCLUDED_GENES:|CCND2
Human Viral_Feuerhake05_46genes (15870177-FigureS2)	GeneSigDB	5	34	0.568898	0.747323	14.7059	1	5.9293	0.000238352	0.0062604	+*	CCL22|CCR7|CD44|CD69|CFLAR
Human Breast_Wang05_469genes_down_BT-BAF57cells (16135788-Table24)	GeneSigDB	17	378	6.32063	2.47239	4.49735	1	4.31945	0.000238314	0.0062604	++	ABCE1|AFF3|BBIP1|CYB5B|GNL3|HK2|IDH3A|IER5|MAN1A1|NDUFV2|PLAGL1|POLR3G|PTPLA|RNF138|SACS|STAM|TLE4
CHICAS_RB1_TARGETS_CONFLUENT	MSigDB_C2	22	565	9.45325	3.01616	3.89381	1	4.15984	0.000241417	0.00632747	++	AFF3|ARNT2|CD200|CD44|CHML|CNTNAP1|DOCK10|EHD1|FAM46C|LBH|LIMD1|MIR155HG|NT5DC2|PAK1|PCK2|PDLIM1|RAP1GDS1|SOGA2|TGFBR2|TRAM2|TYMS|UGCG
GAVIN_FOXP3_TARGETS_CLUSTER_T7	MSigDB_C2	8	98	1.64038	1.26769	8.16327	1	5.0167	0.000242543	0.00634354	+*	CD47|MARCKS|MTHFD1|PNP|RAC2|RAP1GDS1|STAMBPL1|UCK2
Myeloid_Node1536	SignatureDB	4	19	0.316951	0.557992	21.0526	1	6.60054	0.000244952	0.00636047	+*	HCK|LILRB2|MNDA|RNASE6
Human Breast_Troester06_25genes-up-sham-ZR75-1 (17150101-TableS1j)	GeneSigDB	4	19	0.318973	0.559833	21.0526	1	6.57522	0.000244952	0.00636047	+*	HIST1H1C|LILRA2|UBE2E3|VOPP1
Human Leukemia_Calln08_651genes (18362358-Table10)	GeneSigDB	17	379	6.33959	2.47422	4.48549	1	4.30859	0.000245761	0.00636047	+*	ACSM3|ADRB2|B4GALT1|CKAP4|FGD2|HIST1H1C|HIST1H2AC|HIVEP1|IER5|NEK3|OAS1|POLR1C|RAC2|SP110|TCEB3|TCF4|TOR1AIP1|EXCLUDED_GENES:|BLNK
MULLIGHAN_MLL_SIGNATURE_1_UP	MSigDB_C2	17	379	6.33841	2.47875	4.48549	1	4.30119	0.000245761	0.00636047	++/*+	ADRB2|ARHGEF3|B4GALT1|BATF|CNPY3|IKZF1|LILRA2|LILRB2|PARL|PCYT1A|PTPN2|RAB7L1|RAC2|RNASE6|SLA|SLC43A3|TOR1AIP1
Human Lymphoma_Melendez05_4229genes (15656903-SuppTable1)	GeneSigDB	66	2557	42.7656	6.1492	2.58115	1	3.77845	0.000244109	0.00636047	++	ANXA11|ARHGEF3|BCL2|BMPR2|BPGM|CASP10|CCR7|CD69|CDYL|CHD1|CHD2|CSDA|DCTD|DLEU1|EBNA1BP2|EHD1|FTSJ1|FZD6|GAB1|GLO1|GPR183|GPX7|GTF3A|HCK|HIVEP1|IL10RA|IL12A|IQGAP2|IRF2BP2|ITGAE|KLF8|KPTN|LYN|MAP3K5|MAPKAPK2|MAT2A|NFKBIB|NOC3L|OAS1|PAK1|PCK2|PDE4B|PIM2|PLAGL1|PPIB|PTPRJ|RAB30|RAB7L1|S1PR1|SACS|SEC61A1|SEC61B|SMARCA2|SMARCC1|SOGA2|SP100|SP140|STAM|TCEB3|TCF4|TFRC|TGFBR2|TLE1|TUBB4A|UBE2E3|UGCG|EXCL…
Human Breast_Harvell_194genes (16239301-SuppTable2a)	GeneSigDB	11	181	3.02786	1.71909	6.07735	1	4.63741	0.00024876	0.00642467	+*	AEN|C10ORF2|CCDC86|GRWD1|NEK3|NOC3L|NOLC1|PDCD11|PDCD4|RRP9|SMARCC1
Human UmbilicalCordBloodCells_Miyagawa09_58genes (20067540-Table4)	GeneSigDB	6	53	0.88528	0.931737	11.3208	1	5.48944	0.000249441	0.00642882	+*	ADRB2|AICDA|CCL22|IL17RB|RNASE6|TCF4
Human Leukemia_Yeoh02_105genes (12086872-Table12g)	GeneSigDB	8	99	1.65563	1.27193	8.08081	1	4.98799	0.000260076	0.00666952	+*	B4GALT1|CHN2|DBN1|IQGAP2|PDLIM1|PRKCB|PTPN2|SMARCA2|EXCLUDED_GENES:|IRF4|SH3BP5
OKUMURA_INFLAMMATORY_RESPONSE_LPS	MSigDB_C2	11	182	3.04392	1.72528	6.04396	1	4.61146	0.000260871	0.00666952	++	ABCE1|CCR7|CD200|CHST7|DOCK10|FA2H|FZD6|MARCKS|PION|TLE1|XK|EXCLUDED_GENES:|SH3BP5
GENTILE_UV_HIGH_DOSE_DN	MSigDB_C2	15	311	5.20134	2.24603	4.82315	1	4.36266	0.000262015	0.00666952	**/++	ATP13A3|C5ORF30|CHD1|CLINT1|DUSP5|MAT2A|NDUFV2|PDE4B|STAM|TGFBR2|TLE1|TLE4|TLK1|TNFAIP8|UGCG|EXCLUDED_GENES:|PTPN1
CELLULAR_PROTEIN_METABOLIC_PROCESS	MSigDB_C5	35	1109	18.5472	4.17272	3.156	1	3.94296	0.000262005	0.00666952	+*	ADPRH|ADRB2|BCL3|CD37|CDK12|CDKL1|CHST7|CSNK1E|DUSP5|ERN1|ERP29|GMFG|HCK|IL10|IL12A|LMAN1|LYN|MAPKAPK2|MRPL3|MSRB1|NGLY1|OXSR1|PAK1|PAK2|PARP3|PARP4|PIM2|PKN3|PLK3|PRKCB|PTPLA|PTPN2|PTPRJ|SIK3|TLK1|EXCLUDED_GENES:|CCND2|FUT8|IRF4|PIM1
Human Breast_Larsson07_3085genes (17638893-SuppTable2)	GeneSigDB	59	2221	37.1439	5.76359	2.65646	1	3.79209	0.000260945	0.00666952	++	ADTRP|ANKRD12|ATP1B3|AVEN|BPGM|C10ORF2|C16ORF5|CDK12|CHD1|CHST2|CYB5B|CYB5R2|DCTD|ECI1|EHHADH|ELOVL7|EPM2AIP1|FKBP11|FTSJ1|FZD6|GABPB1|GCDH|GLO1|GMPPB|GNPTAB|GRWD1|GTF3A|HIST1H1C|HSP90B1|IQGAP2|ITGAE|LBH|LITAF|MLKL|MSRB1|NEK3|NETO2|NFKBIZ|NOSIP|NT5DC2|PARL|PCYT1A|PMM2|POLR1C|RAB7L1|RAVER2|RRP9|SACS|SCAPER|SEC13|SEC61B|SLC27A5|SLC38A2|SP110|STAM|UGCG|USP46|ZBTB11|ZMYND11
DAZARD_UV_RESPONSE_CLUSTER_G6	MSigDB_C2	10	153	2.56143	1.58352	6.53595	1	4.69749	0.000264084	0.00670838	++	ATP13A3|CDYL|CREB3L2|FNBP1L|FNDC3A|KIF14|MAP3K5|SOGA2|TLE4|TLK1
Human Leukemia_Haslinger04_36genes (15459216-TableA2e)	GeneSigDB	5	35	0.58576	0.758878	14.2857	1	5.8168	0.00027429	0.00695336	+*	AFF3|ARID3A|HIST1H1C|HIST1H2AC|RAP1GDS1
Human Pancreas_Nakamura04_168genes (14767473-Table3)	GeneSigDB	10	154	2.57311	1.58393	6.49351	1	4.68891	0.000278298	0.00704053	+*	AP3B1|ENOSF1|GLO1|GNL3|HSP90B1|MARCKS|MRPL3|PLEKHG1|TGFBR2|VOPP1
Plasma_cell_gt_B_cell	SignatureDB	16	348	5.82054	2.37498	4.5977	1	4.28613	0.000282557	0.00713371	+*	C19ORF10|CASP10|CFLAR|CKAP4|CREB3L2|DUSP5|EIF4G1|FKBP11|FNDC3A|GMPPB|HSP90B1|MANF|SEC61B|SLAMF7|TMEM184B|TRAM2|EXCLUDED_GENES:|IRF4
THUM_SYSTOLIC_HEART_FAILURE_UP	MSigDB_C2	18	420	7.02264	2.60699	4.28571	1	4.21074	0.000283342	0.00713895	++/*+	ANKRD12|ANP32A|ARHGAP24|CDKL1|HSP90B1|IGHM|LMAN1|LYN|MAN1A1|MAPKAPK2|MAT2A|MNDA|MPEG1|RAC2|RDX|SEC61A1|TBL1XR1|TGFBR2|EXCLUDED_GENES:|ENTPD1
ALCALAY_AML_BY_NPM1_LOCALIZATION_DN	MSigDB_C2	11	184	3.07502	1.73412	5.97826	1	4.57004	0.000286589	0.00720608	*+/++	CD200|CD69|GPX7|MAN1A1|MCM2|MTHFD1|NGLY1|PLAGL1|SIDT1|TESC|TYMS
MULLIGHAN_MLL_SIGNATURE_2_DN	MSigDB_C2	14	280	4.68673	2.13179	5	1	4.36876	0.000289893	0.00727438	++/++	ABHD10|C5ORF30|C9ORF91|CD200|DBN1|DLEU1|GNPTAB|IL2RA|LEPROTL1|MAN1A1|PDCD4|PTPLA|STAM|TGFBR2
MODULE_8	MSigDB_C4	18	421	7.04127	2.60803	4.27553	1	4.20192	0.000291548	0.0073011	++	ATP13A3|DBN1|ECI1|GYG1|IQGAP2|MCM2|MRPL3|NOLC1|PNP|SEC13|TFRC|TLE1|TLK1|TNFAIP8|TOR1AIP1|TYMS|UCK2|UMPS
CAGCAGG,MIR-370	MSigDB_C3	10	155	2.59185	1.59167	6.45161	1	4.65434	0.000293146	0.00732627	+*	C6ORF106|CNTNAP1|DNMT3A|MARCKS|PDCD11|RAP1GDS1|STAT3|TGFBR2|TRIT1|ZMYND11
TONKS_TARGETS_OF_RUNX1_RUNX1T1_FUSION_HSC_UP	MSigDB_C2	11	185	3.09684	1.73817	5.94595	1	4.54683	0.000300229	0.00748116	++/++	BBIP1|CD200|CD69|COCH|FNBP1L|IL17RB|LILRA2|PDCD4|PDE4B|S1PR1|TGFBR2
STK33_DN	MSigDB_C6	14	281	4.69933	2.13718	4.98221	1	4.35184	0.000300552	0.00748116	++/++	AFF3|BCL2|BSPRY|BTLA|C7ORF23|CHML|FAM46C|FTSJ1|GPM6A|HPDL|SLC27A5|SLC38A5|TNFAIP8|TRIT1
ACCAAAG,MIR-9	MSigDB_C3	20	497	8.31695	2.83008	4.02414	1	4.12817	0.0003013	0.00748469	+*	ADAMTS6|ANKRD12|AP3B1|ARHGAP24|ARID3B|C18ORF25|CD47|CSDA|FAM46C|FNBP1L|GAB2|IPO4|MAPKAPK2|PAK2|SACS|SLC19A2|SLC33A1|STAM|TLK1|ULK2|EXCLUDED_GENES:|FOXP1
YU_MYC_TARGETS_DN	MSigDB_C2	6	55	0.91969	0.949246	10.9091	1	5.35194	0.000306262	0.00757005	**/+*	ARID3B|CD37|IL10RA|LOC645638|PRKCB|SPIB
Human Breast_Hannemann06_78genes_DCIS (17069663-Table5)	GeneSigDB	6	55	0.920635	0.950144	10.9091	1	5.34589	0.000306262	0.00757005	++	BCL2|CASP10|DLEU1|GMFG|PLAC8|PLEKHG1
ACEVEDO_LIVER_TUMOR_VS_NORMAL_ADJACENT_TISSUE_UP	MSigDB_C2	29	860	14.3913	3.69544	3.37209	1	3.95316	0.000306571	0.00757005	+*/**	AP3B1|C19ORF10|CKAP4|CNPY3|COPB2|CREB3L2|CTR9|DOCK10|EPM2AIP1|FKBP11|HIST1H1C|HIST1H2AC|IPO4|LSG1|MARCKS|METTL13|PARP4|S1PR1|SEC13|SEC61B|SLC33A1|SMARCC1|STAMBPL1|TFRC|TMEM184B|TOR1AIP1|TYMS|UCK2|VOPP1|EXCLUDED_GENES:|PTPN1
REGULATION_OF_TRANSCRIPTIONDNA_DEPENDENT	MSigDB_C5	19	460	7.68923	2.72121	4.13043	1	4.15653	0.000307338	0.00757387	+*	CHD1|CHD2|CNBP|CSDA|LIMD1|LITAF|PLAGL1|POLR3G|SMARCA2|SMARCC1|SP100|SPIB|STAT3|SUB1|TCEB3|TCF4|TGIF1|ZBTB32|ZMYND11
PANGAS_TUMOR_SUPPRESSION_BY_SMAD1_AND_SMAD5_DN	MSigDB_C2	10	156	2.61005	1.59759	6.41026	1	4.6257	0.00030865	0.00759108	++/+*	BMPR2|C9ORF91|GPD2|GPX7|IGSF3|NIPA2|PARL|SRPRB|TMEM39A|UGCG
IFN_meta	SignatureDB	15	316	5.284	2.26529	4.74684	1	4.28907	0.000310424	0.00761954	++	CASP10|CCDC50|CD69|CHD1|DUSP5|FAM46C|LAG3|LPIN2|MTDH|OAS1|PLAC8|SP100|SP110|TCF4|TRAFD1
Human Lymphoma_Islam02_39genes (11920564-Table4)	GeneSigDB	5	36	0.601403	0.767738	13.8889	1	5.72929	0.000314193	0.00769681	++	CCL22|CCR7|GPR183|HCK|LILRA2
ACTGCCT,MIR-34B	MSigDB_C3	12	218	3.64657	1.88775	5.50459	1	4.42507	0.000328437	0.00802984	+*	ANKRD12|ARNT2|ATP1B3|CELF2|CNTNAP1|IQGAP2|MAT2A|MTDH|PAK1|PHACTR1|RDX|SOGA2|EXCLUDED_GENES:|FOXP1
IRF4_target_MM_B_cell_activation	SignatureDB	7	78	1.30342	1.13124	8.97436	1	5.03572	0.000331203	0.00804973	+*	BCL2|BSPRY|CFLAR|ELL2|HK2|SLAMF7|UCK2|EXCLUDED_GENES:|IRF4
BOYLAN_MULTIPLE_MYELOMA_D_DN	MSigDB_C2	7	78	1.30504	1.13129	8.97436	1	5.03406	0.000331203	0.00804973	*+/+*	BCL3|CD44|EHHADH|IL2RA|LOC645638|MARCKS|ST3GAL5
CELLULAR_MACROMOLECULE_METABOLIC_PROCESS	MSigDB_C5	35	1123	18.7801	4.19639	3.11665	1	3.86521	0.000330232	0.00804973	++	ADPRH|ADRB2|BCL3|CD37|CDK12|CDKL1|CHST7|CSNK1E|DUSP5|ERN1|ERP29|GMFG|HCK|IL10|IL12A|LMAN1|LYN|MAPKAPK2|MRPL3|MSRB1|NGLY1|OXSR1|PAK1|PAK2|PARP3|PARP4|PIM2|PKN3|PLK3|PRKCB|PTPLA|PTPN2|PTPRJ|SIK3|TLK1|EXCLUDED_GENES:|CCND2|FUT8|IRF4|PIM1
Human Leukemia_Verhaak05_568genes (16109776-TableS1)	GeneSigDB	18	426	7.12752	2.62668	4.22535	1	4.13924	0.000335759	0.00814446	++	BPGM|C1ORF186|CD200|CD69|FAIM3|FZD6|HCK|HIST1H1C|LILRA3|LILRA6|LILRB2|MAN1A1|MARCKS|P2RX5|PDE4B|SIDT1|SPIB|UGCG|EXCLUDED_GENES:|BLNK|CCND2
Human Lymphoma_Shin07_62genes (17638852-Table2)	GeneSigDB	6	56	0.937356	0.959026	10.7143	1	5.27894	0.000338233	0.00818842	+*	CCR7|CD69|IGHM|IL2RA|RAC2|TNFAIP8
YAO_TEMPORAL_RESPONSE_TO_PROGESTERONE_CLUSTER_11	MSigDB_C2	8	103	1.72062	1.29859	7.76699	1	4.83555	0.000340898	0.00822075	+*	ABCE1|GMPPB|GNL3|HSP90B1|MANF|RDX|TARS|TFRC
CASORELLI_ACUTE_PROMYELOCYTIC_LEUKEMIA_DN	MSigDB_C2	24	659	11.0187	3.24709	3.64188	1	3.99783	0.000340584	0.00822075	++/++	C19ORF10|C6ORF106|CKAP4|DLEU1|ECI1|ENOSF1|FZD6|GLO1|GMPPB|HEATR6|IVNS1ABP|MCM2|NOC3L|NOLC1|PPIB|RDX|RRP9|SELRC1|SLA|SLC27A5|TCF4|TRAFD1|TYMS|VOPP1|EXCLUDED_GENES:|PIM1
Mouse StemCell_Chambers07_395genes (17676974-TableS5)	GeneSigDB	15	319	5.33714	2.27342	4.70219	1	4.25037	0.000343016	0.00825574	++	AKIRIN1|BPGM|CABLES1|CDYL|CNBP|FECH|GMPPB|GNPTAB|MINA|MTDH|PCK2|SACS|SUB1|TLE4|TYMS
KEGG_CHEMOKINE_SIGNALING_PATHWAY	MSigDB_C2	11	188	3.14479	1.75126	5.85106	1	4.48547	0.000344476	0.00827478	+*	CCL18|CCL22|CCR10|CCR7|HCK|LYN|NFKBIB|PAK1|PRKCB|RAC2|STAT3
KOYAMA_SEMA3B_TARGETS_UP	MSigDB_C2	14	285	4.76769	2.15264	4.91228	1	4.28884	0.000346619	0.00831013	++/*+	ADRB2|CD44|GMPPB|HK2|IL12A|P2RX5|PLEKHG1|RILPL2|RNF183|SP100|SP140|SPATA5|ST6GALNAC4|TOX2
MARTENS_TRETINOIN_RESPONSE_DN	MSigDB_C2	28	825	13.8063	3.62871	3.39394	1	3.9115	0.000350626	0.00838993	-*/+*	CLECL1|CNBP|COCH|ERP29|FAM46C|GMPPB|GNL3|GRWD1|HIST1H2AC|HPDL|IRF2BP2|LRRC33|MAT2A|NABP1|NGLY1|NOLC1|NT5DC2|PDCD4|POLR1C|PPIB|SLC38A2|SLC43A3|SMARCC1|SMCHD1|TGIF1|TYMS|UMPS|WDR6|EXCLUDED_GENES:|CCND2
REACTOME_ASPARAGINE_N_LINKED_GLYCOSYLATION	MSigDB_C2	7	79	1.32181	1.13826	8.86076	1	4.98848	0.000358255	0.00855593	+*	ALG3|B4GALT1|GMPPB|LMAN1|MAN1A1|PMM2|SEC13|EXCLUDED_GENES:|FUT8
TSUDA_ALVEOLAR_SOFT_PART_SARCOMA	MSigDB_C2	3	9	0.150291	0.384335	33.3333	1	7.41464	0.000361997	0.00861205	+*	LYN|MAPKAPK2|PCK2|EXCLUDED_GENES:|PIM1
Human Leukemia_Li07_12genes_Anti-apoptosis (17313671-SuppTable1a)	GeneSigDB	3	9	0.150416	0.38487	33.3333	1	7.40401	0.000361997	0.00861205	+*	BCL2|PDCD4|S1PR1|EXCLUDED_GENES:|PIM1|SH3BP5
Human Breast_Chang04_772genes_WoundHealing_CSR_genes (14737219-CSRgenes)	GeneSigDB	22	583	9.75627	3.06108	3.77358	1	3.99981	0.00037067	0.00880146	+*	ANKRD12|ARHGEF3|CNTNAP1|COPB2|DLEU1|EBNA1BP2|EIF4G1|EPHB1|GNPTAB|HIST1H2AC|IPO4|MAN1A1|MCM2|MTHFD1|PDCD4|RNF138|SFTPB|SNX18|TNFAIP8|TYMS|UCK2|UMPS|EXCLUDED_GENES:|FUT8
LEE_EARLY_T_LYMPHOCYTE_DN	MSigDB_C2	6	57	0.95355	0.967866	10.5263	1	5.21399	0.000372759	0.00883411	**/+*	BTLA|CCR7|CD44|GPR183|PTPRJ|S1PR1
MANALO_HYPOXIA_DN	MSigDB_C2	14	288	4.81588	2.1648	4.86111	1	4.24248	0.000385018	0.00908981	*+/+-	ATP13A3|EBNA1BP2|GRWD1|IDH3A|IPO4|MCM2|MTHFD1|NOLC1|POLR3G|RRP9|SACS|SELRC1|TSEN2|UMPS
REGULATION_OF_TRANSCRIPTION_FROM_RNA_POLYMERASE_II_PROMOTER	MSigDB_C5	14	288	4.81274	2.16578	4.86111	1	4.24201	0.000385018	0.00908981	+*	CHD1|CHD2|CSDA|LITAF|PLAGL1|SMARCA2|SMARCC1|SPIB|STAT3|SUB1|TCEB3|TGIF1|ZBTB32|ZMYND11
Mouse Liver_White05_638genes (15546871-Table1S)	GeneSigDB	20	507	8.47499	2.85414	3.94477	1	4.03799	0.000388531	0.00915528	+*	ACSM3|ANKRD12|ARID3A|CFLAR|CYB5B|ELL2|FKBP11|GAB1|GLO1|HSP90B1|LITAF|MANF|MSRB1|MTDH|NFKBIZ|PECR|PRKCB|PTPN2|SLC38A2|TGIF1|EXCLUDED_GENES:|BMF
MODULE_52	MSigDB_C4	18	432	7.22558	2.64041	4.16667	1	4.08058	0.000396406	0.00932307	++	C5ORF30|COL9A3|DBN1|GYG1|HIST1H1C|IGSF3|MCM2|NOLC1|PDE4B|PNP|RAC2|RRP9|ST6GALNAC4|TFRC|TGFBR2|TRAM2|UCK2|UMPS
REGULATION_OF_RNA_METABOLIC_PROCESS	MSigDB_C5	19	470	7.85926	2.74971	4.04255	1	4.0516	0.000400627	0.00940447	+*	CHD1|CHD2|CNBP|CSDA|LIMD1|LITAF|PLAGL1|POLR3G|SMARCA2|SMARCC1|SP100|SPIB|STAT3|SUB1|TCEB3|TCF4|TGIF1|ZBTB32|ZMYND11
Mouse Liver_Jeong06_492genes (16423883-Table2S)	GeneSigDB	12	223	3.72705	1.90759	5.38117	1	4.33685	0.000403084	0.00944422	++	ATP1B3|CD37|CD44|GLO1|GPD2|HIST1H1C|IRF2BP2|MPEG1|PLAC8|SLC38A2|TFRC|TGFBR2
WUNDER_INFLAMMATORY_RESPONSE_AND_CHOLESTEROL_UP	MSigDB_C2	6	58	0.971023	0.975401	10.3448	1	5.15581	0.00040998	0.00955153	+*/**	LYN|MPEG1|NFKBIZ|PLAC8|SP110|TFRC
MODULE_237	MSigDB_C4	6	58	0.969879	0.97578	10.3448	1	5.15497	0.00040998	0.00955153	+*	FASTKD1|GNPTAB|HEATR6|KCNA3|KLF8|TLK1
Blood_CD4+Tcell_gt_thymic_SP_CD4+Tcell	SignatureDB	6	58	0.970943	0.976798	10.3448	1	5.14851	0.00040998	0.00955153	++	CKAP4|IL10RA|LITAF|MAP3K5|NFKBIZ|PION|EXCLUDED_GENES:|SH3BP5
MODULE_292	MSigDB_C4	9	133	2.22493	1.47565	6.76692	1	4.59123	0.000412078	0.00958237	+*	CCL18|CD200|CD37|IGHM|KIAA0226L|OAS1|P2RY10|SP140|SPIB|EXCLUDED_GENES:|BLNK|FOXP1|IL16
WAKABAYASHI_ADIPOGENESIS_PPARG_RXRA_BOUND_8D	MSigDB_C2	29	876	14.6458	3.72634	3.3105	1	3.8521	0.00041326	0.00959183	+*	ADTRP|ATP1B3|BCL2L10|C6ORF106|CCDC50|CREB3L2|ERP29|GAB2|GLO1|HSP90B1|IDH3A|IL17RB|IL2RA|MLKL|MTDH|NABP1|NFKBIZ|OXSR1|PARL|PARP3|RRP9|SLC19A2|STAMBPL1|TGIF1|TLE1|TOMM70A|TRIT1|ZBTB32|ZFAT
HUANG_DASATINIB_RESISTANCE_UP	MSigDB_C2	7	81	1.3529	1.15303	8.64198	1	4.8976	0.000417661	0.00967581	++/**	CCDC50|ELL2|LEPREL1|LYN|RAC2|TGFBR2|UBE2E3
IRF4_myeloma_induced_Agilent	SignatureDB	11	193	3.2304	1.7758	5.69948	1	4.37528	0.000430377	0.00995177	+*	ABHD10|BSPRY|CFLAR|ELL2|FAM100B|FKBP11|HK2|MOCOS|RAB30|SLAMF7|SLC38A2
Human Breast_Nagaraja10_1345genes (20081105-ST-1)	GeneSigDB	34	1097	18.3438	4.14898	3.09936	1	3.7735	0.000443197	0.0102291	+*	ACSM3|ARID3A|ARID3B|ARMC7|BCL2|C1ORF186|CCDC86|DUSP5|ECI1|ERP29|FA2H|FAM100B|HOOK1|IL17RB|IPO4|IVNS1ABP|KIF13B|LITAF|MCM2|MSRB1|NETO2|NOLC1|PCK2|PECR|PKN3|PNP|PTPN2|RAVER2|RILPL2|RRP9|SOGA2|TGIF1|TLE1|TYMS
WIERENGA_STAT5A_TARGETS_GROUP2	MSigDB_C2	6	59	0.985719	0.983162	10.1695	1	5.10016	0.000450039	0.010262	+*	CCL22|CCR7|CKAP4|COCH|GNPTAB|LEPREL1
MAGNESIUM_ION_BINDING	MSigDB_C5	6	59	0.985894	0.98377	10.1695	1	5.09683	0.000450039	0.010262	+*	ERN1|GCLC|MAP3K5|OXSR1|SIK3|TESC
ODONNELL_TARGETS_OF_MYC_AND_TFRC_UP	MSigDB_C2	7	82	1.36941	1.15814	8.53659	1	4.86174	0.000450178	0.010262	++/**	CD37|CD44|CD69|FAIM3|FAM46C|MPEG1|PDE4B
Human Leukemia_Puigdecanet08_96genes (18480837-SuppTable1)	GeneSigDB	7	82	1.37194	1.15944	8.53659	1	4.85413	0.000450178	0.010262	+*	CD44|CKAP4|DUSP5|IER5|NFKBIZ|PDE4B|PHACTR1
IFN_PMBC_4x_Up	SignatureDB	7	82	1.37255	1.15988	8.53659	1	4.85177	0.000450178	0.010262	+*	CASP10|DUSP5|LAG3|OAS1|SP100|SP110|TRAFD1
HOXA9_DN.V1_UP	MSigDB_C6	11	194	3.24727	1.7792	5.6701	1	4.35742	0.00044955	0.010262	+*/++	AKIRIN1|ARHGEF3|FNDC3A|GPR183|HIST1H2AC|IER5|IL10RA|MNDA|MSRB1|UBE2W|ZNF107
Human StemCell_Matushansky08_1453genes (18310505-TableS7)	GeneSigDB	38	1277	21.3493	4.4598	2.97572	1	3.73352	0.000451261	0.010262	++	ABHD10|AP3M2|C19ORF10|CD47|CKAP4|CNTNAP1|COPB2|DBN1|DOCK10|EPM2AIP1|EPS15L1|FTSJ1|GPX7|GRWD1|KCTD5|KIF14|LMAN1|MCM2|NETO2|NGLY1|PPIB|SACS|SEC61A1|SEC61B|SLC33A1|SMARCC1|SMCHD1|SOGA2|SRPRB|ST6GALNAC4|SUB1|TMEM39A|TOMM70A|TRIT1|TYMS|ULK2|WDR6|ZBTB11
CYTOPLASM	MSigDB_C5	56	2123	35.496	5.64665	2.63778	1	3.63118	0.000451041	0.010262	++	ABCE1|ADRB2|AICDA|ALG3|ANP32A|ANXA11|AP3B1|B4GALT1|BCL2|BCL2L10|BCL3|CABLES1|CARD11|CHST2|CLINT1|COPB2|CSDA|DNMT3A|EHHADH|EIF4G1|ERN1|ERP29|FGD2|GCDH|GLO1|HSP90B1|KIF13B|KPTN|LMAN1|LYN|MAN1A1|MTHFD1|NGLY1|NOLC1|NOSIP|OAS1|PAK1|PCK2|PDCD4|PKN3|PPIB|PRKCB|RAB30|SEC61B|SLC27A5|SLC33A1|SPATA5|SPIB|STAT3|TARS|TESC|TFRC|TNFAIP8|UBA5|VOPP1|WDFY1|EXCLUDED_GENES:|PIM1|SH3BP5
MODULE_436	MSigDB_C4	9	135	2.25712	1.48327	6.66667	1	4.54596	0.000459698	0.0104347	+*	CCL18|CD200|CD37|IGHM|KIAA0226L|OAS1|P2RY10|PLCL2|SPIB|EXCLUDED_GENES:|BLNK|FOXP1
KINASE_ACTIVITY	MSigDB_C5	16	364	6.08877	2.42676	4.3956	1	4.08414	0.000462899	0.010469	++	CDKL1|CSNK1E|ERN1|HK2|LYN|MAP3K5|MAPKAPK2|OXSR1|PAK1|PAK2|PIM2|PLK3|PRKCB|SIK3|TGFBR2|TLK1|EXCLUDED_GENES:|PIM1
YOSHIMURA_MAPK8_TARGETS_DN	MSigDB_C2	16	364	6.08978	2.42979	4.3956	1	4.07864	0.000462899	0.010469	*+/++	CD200|CHD2|CYB5B|GPD2|HOOK1|LITAF|MTDH|NOLC1|PDE4B|PPIB|PTPRJ|SEC61B|ST3GAL5|SUB1|TFRC|TOR1AIP1
KLF2_repressed	SignatureDB	8	108	1.8075	1.32974	7.40741	1	4.65694	0.000469563	0.010581	++	DCTD|FAM46C|GYG1|IQGAP2|KIAA0226L|P2RX5|PLAC8|PTPLA
MODULE_53	MSigDB_C4	17	401	6.70589	2.54765	4.2394	1	4.04062	0.000469373	0.010581	++	C5ORF30|CD37|CD69|DBN1|DUSP5|HCK|IGHM|KIF14|MCM2|MNDA|PIM2|PNP|RAC2|RRP9|SLA|ST6GALNAC4|TYMS|EXCLUDED_GENES:|CCND2
DODD_NASOPHARYNGEAL_CARCINOMA_DN	MSigDB_C2	40	1372	22.9452	4.61566	2.91545	1	3.69499	0.000478503	0.0107628	*+/+*	ABCE1|AEN|AP3M2|ARNT2|C10ORF2|C16ORF88|C19ORF10|CD200|CDK12|CKAP4|DCTD|FASTKD1|GABPB1|KIF14|LMAN1|MAT2A|MCM2|METTL8|MNDA|MRPL3|NOC3L|NOLC1|SACS|SELRC1|SOGA2|SUB1|TARS|TFRC|TLE1|TMEM39A|TOMM70A|TRAM2|TYMS|U2SURP|UBA5|UBE2E3|UCK2|UMPS|VASH2|ZNF614|EXCLUDED_GENES:|CCND2|ETV6
Human Breast_Teschendorff07_813genes_ERneg (17683518-813GeneTable)	GeneSigDB	24	675	11.2925	3.28766	3.55556	1	3.86521	0.000479404	0.0107635	++	ADAM8|ARNT2|CD69|COL9A3|COPB2|DUSP5|EIF4G1|IL10RA|IVNS1ABP|KLF8|LEPROTL1|LILRB2|LYN|MCM2|MRPL3|PCK2|PIM2|PLAC8|PMM2|SEC61A1|SP110|TLE1|TUBB4A|TYMS
Tcell_PIind_CalciumDefPtdown4x_Feske_Fig6	SignatureDB	7	83	1.38595	1.16552	8.43373	1	4.81677	0.000484683	0.0108065	+*	CD200|CFLAR|ELL2|IL10|MAPKAPK2|SLA|TFRC|EXCLUDED_GENES:|IRF4
RESPONSE_TO_OTHER_ORGANISM	MSigDB_C5	7	83	1.38813	1.1667	8.43373	1	4.81005	0.000484683	0.0108065	+*	ABCE1|BCL2|BCL3|CCL22|IL10|IL12A|IVNS1ABP
Human Leukemia_Ruiz-Vela08_468genes (18032706-SuppTable3)	GeneSigDB	17	402	6.72508	2.54879	4.22886	1	4.0313	0.000482753	0.0108065	++	ADRB2|CCDC86|CD44|CHD1|COL9A3|DBN1|GAB1|MAT2A|MOCOS|PCK2|PHACTR1|SLC27A5|SLC38A2|ST3GAL5|SUB1|TCEB3|TFRC
TRANSCRIPTION_DNA_DEPENDENT	MSigDB_C5	23	635	10.6206	3.18719	3.62205	1	3.8841	0.000485687	0.0108065	+*	CHD1|CHD2|CNBP|CSDA|ELL2|GTF3A|IVNS1ABP|LIMD1|LITAF|PLAGL1|POLR1C|POLR3G|SMARCA2|SMARCC1|SP100|SPIB|STAT3|SUB1|TCEB3|TCF4|TGIF1|ZBTB32|ZMYND11
RODRIGUES_THYROID_CARCINOMA_POORLY_DIFFERENTIATED_DN	MSigDB_C2	27	800	13.3808	3.57141	3.375	1	3.81339	0.000485361	0.0108065	+*/++	ARHGEF3|BBIP1|BCL2|CD44|CD47|CFLAR|CHD2|DCTD|ELL2|ENOSF1|EPM2AIP1|LBH|LIMD1|MAP3K5|PAK1|PDCD4|PEBP1|PHACTR2|RILPL2|SIK3|TBL1XR1|TCF4|TGFBR2|TNFAIP8|TSHZ1|U2SURP|WDR11|EXCLUDED_GENES:|CCND2|FOXP1
Blimp_Bcell_repressed	SignatureDB	6	60	1.00313	0.992997	10	1	5.03211	0.000493085	0.0109514	++	AICDA|CD37|LYN|SP110|SP140|SPIB|EXCLUDED_GENES:|BLNK|IL16
TCCAGAT,MIR-516-5P	MSigDB_C3	8	109	1.82333	1.33558	7.33945	1	4.62472	0.000499494	0.0110739	++	ADAMTS6|B4GALT1|DBN1|EPHB1|KCNA3|STAT3|TLK1|TRIT1
Human InVitro_Bild06_206genes (16273092-TableS1a)	GeneSigDB	10	166	2.77438	1.64562	6.0241	1	4.39083	0.000505038	0.0111702	++	ADAM8|ALG3|CCDC86|CFLAR|HIST1H2AC|HK2|IPO4|LSG1|MCOLN2|RRP9
Human Bone_Lu07_301genes (17682054-Table1)	GeneSigDB	14	296	4.94717	2.19222	4.72973	1	4.12952	0.000505641	0.0111702	++	CASP10|ERN1|FASTKD1|GAB1|PAK1|PAK2|PARP4|PDCD4|PLAGL1|PRKCB|STAT3|TM2D3|TNFAIP8|WDR6|EXCLUDED_GENES:|BMF
RNA_BIOSYNTHETIC_PROCESS	MSigDB_C5	23	637	10.659	3.19333	3.61068	1	3.86462	0.000507098	0.0111824	+*	CHD1|CHD2|CNBP|CSDA|ELL2|GTF3A|IVNS1ABP|LIMD1|LITAF|PLAGL1|POLR1C|POLR3G|SMARCA2|SMARCC1|SP100|SPIB|STAT3|SUB1|TCEB3|TCF4|TGIF1|ZBTB32|ZMYND11
FUNG_IL2_SIGNALING_1	MSigDB_C2	3	10	0.16696	0.405404	30	1	6.98819	0.00051073	0.0112424	+*	IL2RA|MAT2A|NOLC1|EXCLUDED_GENES:|CCND2
MODULE_171	MSigDB_C4	9	137	2.2919	1.49737	6.56934	1	4.47991	0.00051175	0.0112449	+*	CCL18|CD200|IGHM|IL10RA|KCNA3|OAS1|P2RY10|S1PR1|SP110|EXCLUDED_GENES:|FOXP1
ACOSTA_PROLIFERATION_INDEPENDENT_MYC_TARGETS_UP	MSigDB_C2	7	84	1.40389	1.17374	8.33333	1	4.76775	0.000521264	0.0114336	+*/+*	GCDH|MINA|NOLC1|PDCD11|PEBP1|SLC19A2|UCK2
TACTTGA,MIR-26A,MIR-26B	MSigDB_C3	14	297	4.96315	2.19701	4.7138	1	4.11325	0.000522767	0.0114463	++	ADAMTS6|ARHGAP17|CD200|CELF2|DUSP5|EHD1|FA2H|MTDH|NABP1|PAK2|SACS|SLC38A2|TMEM184B|ULK2|EXCLUDED_GENES:|CCND2|PIM1
SENGUPTA_NASOPHARYNGEAL_CARCINOMA_WITH_LMP1_UP	MSigDB_C2	17	405	6.77485	2.55794	4.19753	1	3.99741	0.000524883	0.0114723	+*/*+	ANKRD12|C5ORF30|CCDC50|EIF4G1|HSP90B1|MOCOS|NETO2|OAS1|POLR3G|SMCHD1|SPIB|TBL1XR1|TCF4|U2SURP|UBE2W|VASH2|WDFY1|EXCLUDED_GENES:|ETV6
Human StemCell_Hoque08_28genes (18413733-Table2)	GeneSigDB	4	23	0.385207	0.615278	17.3913	1	5.87506	0.000530782	0.0115641	+*	ARMC7|B4GALT1|KIAA0226L|TUBB4A
Human Leukemia_Teuffel04_132genes (15257931-SuppTableD)	GeneSigDB	8	110	1.84037	1.34225	7.27273	1	4.58903	0.000530952	0.0115641	++	BCL3|CYB5R2|GTF3A|IQGAP2|KIAA0226L|MINA|PRKCB|UBE2E3
BILBAN_B_CLL_LPL_UP	MSigDB_C2	6	61	1.02081	1.00043	9.83607	1	4.97703	0.000539267	0.0117246	+*/*+	CCR7|CREB3L2|IGSF3|OAS1|PHF16|ST6GALNAC4|EXCLUDED_GENES:|IRF4|PIM1
MUELLER_PLURINET	MSigDB_C2	14	298	4.98766	2.20006	4.69799	1	4.09641	0.000540384	0.0117282	+*	ANP32A|ARID3B|BCL2|GNL3|MCM2|MTHFD1|NFKBIB|NOLC1|PAK1|PIAS2|PNP|POLR1C|SMARCC1|TGIF1
AAGCCAT,MIR-135A,MIR-135B	MSigDB_C3	15	334	5.58884	2.32872	4.49102	1	4.04135	0.000553807	0.0119985	++	ABCE1|BMPR2|C6ORF106|CACNA1D|CD47|CNTNAP1|DUSP5|MAN1A1|MAT2A|MTDH|PARL|PIM2|RNF138|TBL1XR1|TLK1|EXCLUDED_GENES:|CCND2
Mouse StemCell_Lawlor06_1431genes (16651409-SuppTable5)	GeneSigDB	33	1067	17.8453	4.09727	3.09278	1	3.69872	0.000557098	0.0120487	++	ACPP|ARNT2|BCL2|BCL2L10|BMPR2|CCDC86|CD47|CELF2|CSDA|DBN1|ERP29|GPD2|GRWD1|GTF3A|GYG1|HIST1H1C|HSP90B1|IPO4|LMAN1|MANF|METTL8|PCYT1A|POLR1C|RAP1GDS1|SEC13|SEC61B|SLC27A5|SMARCC1|SMU1|SPATA5|ST6GALNAC4|TARS|TRAFD1|EXCLUDED_GENES:|FUT8|PIM1
Human Sarcoma_Missiaglia10_176genes (20502458-TableS6a)	GeneSigDB	8	111	1.85544	1.347	7.20721	1	4.56165	0.000563995	0.0121766	++	AICDA|BTLA|CLECL1|FAM129C|IKZF1|LILRA4|P2RY10|SPIB|EXCLUDED_GENES:|IL16|IRF4
IFN_PMBC_2x_Up	SignatureDB	9	139	2.32592	1.50788	6.47482	1	4.42614	0.000568542	0.0122534	+*	CASP10|CD69|DUSP5|LAG3|LPIN2|OAS1|SP100|SP110|TRAFD1
REN_ALVEOLAR_RHABDOMYOSARCOMA_DN	MSigDB_C2	17	408	6.8306	2.57202	4.16667	1	3.95386	0.00057014	0.0122664	**/++	B4GALT1|COPB2|CREB3L2|EHD1|ELL2|ERP29|FKBP11|FTSJ1|LBH|LMAN1|SEC61B|SLC33A1|TGFBR2|TMEM184B|TRAM2|UCK2|VOPP1
REACTOME_IMMUNE_SYSTEM	MSigDB_C2	29	894	14.9456	3.75945	3.24385	1	3.73842	0.000571435	0.0122729	++	BCL2|BTLA|CARD11|CASP10|CD44|CNPY3|EIF4G1|GAB2|HCK|HSP90B1|IL2RA|LILRB2|LYN|MAPKAPK2|NFKBIB|OAS1|PAK1|PAK2|PRKCB|PTPN2|RNF138|SEC13|SEC61A1|SEC61B|SP100|STAT3|UBA5|UBE2E3|UBE2W|EXCLUDED_GENES:|BLNK|IRF4|PTPN1
ZHAN_MULTIPLE_MYELOMA_MF_DN	MSigDB_C2	5	41	0.685336	0.820345	12.1951	1	5.25958	0.000583241	0.0124832	++/++	CREB3L2|MTDH|SCAPER|TNFAIP8|ZNF275
CHEN_HOXA5_TARGETS_9HR_DN	MSigDB_C2	5	41	0.686935	0.820931	12.1951	1	5.25387	0.000583241	0.0124832	**/+*	ANP32A|CKAP4|MARCKS|MAT2A|ST6GALNAC4
chr3q13	MSigDB_C1	7	86	1.438	1.18682	8.13953	1	4.68647	0.000601008	0.0128191	+*	ABHD10|ADPRH|BTLA|CD47|SIDT1|TMEM39A|UMPS
FLECHNER_BIOPSY_KIDNEY_TRANSPLANT_REJECTED_VS_OK_UP	MSigDB_C2	7	86	1.4392	1.18753	8.13953	1	4.68265	0.000601008	0.0128191	+*/++	CELF2|GMFG|IL10RA|PIM2|PRKCB|RAC2|SLA|EXCLUDED_GENES:|ENTPD1
CACGTG_V$MYC_Q2	MSigDB_C3	32	1029	17.2111	4.0285	3.10982	1	3.67107	0.000615195	0.0130991	+*	AEN|ANKRD12|ARHGAP17|ATP1B3|CACNA1D|CNPY3|CSDA|DNMT3A|EBNA1BP2|EIF4G1|FKBP11|GYG1|IPO4|IQGAP2|LPCAT4|MANF|MAT2A|MCM2|MTHFD1|PLAGL1|PLBD1|RAB30|SLC33A1|SLC38A2|SLC38A5|STAT3|TCF4|TET2|TFRC|TLE4|ZADH2|ZBTB11
AACTGGA,MIR-145	MSigDB_C3	12	234	3.91462	1.9527	5.12821	1	4.14061	0.000618868	0.0131547	++	ADPGK|AKIRIN1|ARHGAP24|CD47|CELF2|CLINT1|FNDC3A|IVNS1ABP|PDCD4|PLCL2|TGFBR2|USP46
Human Leukemia_Vallat03_31genes (12586635-Figure1ca)	GeneSigDB	4	24	0.400721	0.628511	16.6667	1	5.72668	0.000628584	0.0133154	+*	HSP90B1|IL2RA|MAT2A|TARS
REACTOME_PYRIMIDINE_METABOLISM	MSigDB_C2	4	24	0.401506	0.628967	16.6667	1	5.72128	0.000628584	0.0133154	+*	DCTD|TYMS|UCK2|UMPS
Human Colon_Dessein10_744genes (20460542-SuppTable1)	GeneSigDB	24	689	11.5216	3.31939	3.48331	1	3.75924	0.000639245	0.0135181	++	ACSM3|ADAMTS6|C10ORF2|CCDC50|CD44|CNBP|COL9A3|DBN1|HK2|IL10RA|KIF13B|LEPREL1|LSG1|MINA|MRPL3|NEK3|NOLC1|PDCD4|TMEM39A|TOMM70A|TRAM2|UBA5|UMPS|WDR11|EXCLUDED_GENES:|BMF|FOXP1
Human Breast_Hernandez09_81genes (19497124-TableS2)	GeneSigDB	6	63	1.05299	1.01607	9.52381	1	4.86877	0.000641667	0.0135188	+*	CCR7|IER5|MPEG1|PLAC8|PLK3|TCF4
CAGGTCC,MIR-492	MSigDB_C3	6	63	1.05426	1.01606	9.52381	1	4.86757	0.000641667	0.0135188	+*	AKIRIN1|DBN1|GAB2|MAT2A|SMARCC1|UBE2W
SENESE_HDAC1_AND_HDAC2_TARGETS_UP	MSigDB_C2	12	235	3.93243	1.95721	5.10638	1	4.12197	0.000642558	0.0135188	+*/*+	ADAMTS6|AFF3|EIF4G1|EPHB1|KLHL21|LMAN1|NFKBIZ|RAC2|SEC61A1|TFRC|TGFBR2|WDR6|EXCLUDED_GENES:|CCND2
Human Immune_Kong10_112genes_ImmPort_CentroblastvsNaive (20460173-ImmPortCentroblastvsNaive)	GeneSigDB	7	87	1.45543	1.19453	8.04598	1	4.64162	0.000644355	0.0135336	++	ADRB2|CD200|CD44|CELF2|DCTD|PARVB|TGFBR2
ION_BINDING	MSigDB_C5	13	269	4.49774	2.094	4.83271	1	4.06029	0.000650353	0.0135904	+*	ERN1|FECH|GCLC|GPD2|HSP90B1|LIMD1|MAN1A1|MAP3K5|MSRB1|OXSR1|PIAS2|SIK3|TESC|EXCLUDED_GENES:|PIM1
Human Embryo_Heim07_327genes (17880687-TableS5)	GeneSigDB	13	269	4.50026	2.09404	4.83271	1	4.05902	0.000650353	0.0135904	++	ANP32A|ATP13A3|CNPY3|FNBP1L|FNDC3A|GPD2|LMAN1|SRPRB|TFRC|TLE1|UBE2W|UGCG|WDFY1|EXCLUDED_GENES:|CCND2|FOXP1
PEREZ_TP53_TARGETS	MSigDB_C2	35	1166	19.5034	4.2726	3.00172	1	3.62697	0.000649453	0.0135904	++	ADRB2|AFF3|ARNT2|C16ORF5|C18ORF25|C7ORF23|CASP10|CELF2|CFLAR|CHST2|COL9A3|CREB3L2|EHHADH|FA2H|FAM108C1|FAM46C|FECH|GAB1|GNPTAB|GPR183|IL10RA|KLHL21|LBH|LIMD1|MAN1A1|MARCH3|MCOLN2|PTPRJ|RILPL2|SIDT1|SLC25A30|SOGA2|TOX2|VASH2|ZNF275|EXCLUDED_GENES:|BLNK|IRF4
FARMER_BREAST_CANCER_CLUSTER_1	MSigDB_C2	5	42	0.701478	0.82945	11.9048	1	5.18238	0.000653066	0.0136011	+*	FKBP11|GMFG|IGHM|IL10RA|OAS1
Human Brain_DePreter10_42genes (20179214-Table2)	GeneSigDB	5	42	0.702612	0.831162	11.9048	1	5.17033	0.000653066	0.0136011	+*	MCM2|MRPL3|PLAGL1|TYMS|ULK2
SIGNAL_TRANSDUCTION	MSigDB_C5	45	1628	27.227	4.99953	2.76413	1	3.55493	0.000657864	0.013678	++	ADRB2|ANP32A|BCL2L10|BCL3|BMPR2|C16ORF5|CCL18|CCL22|CCR10|CD47|CFLAR|CNTNAP1|CSNK1E|EPHB1|ERN1|FGD2|GAB1|GPR183|IL12A|IL2RA|IQGAP2|LILRA2|LILRA3|LILRB2|LIMD1|LITAF|LYN|MAP3K5|MAPKAPK2|NFKBIB|OXSR1|P2RX5|PAK1|PAK2|PKN3|PTPRJ|RAC2|S1PR1|SH2D3C|STAM|STAT3|TLE1|TLK1|TNFRSF13B|VOPP1|EXCLUDED_GENES:|BLNK|PTPN1|SH3BP5
Human Embryo_Heim07_1515genes (17880687-TableS3)	GeneSigDB	31	990	16.5559	3.95096	3.13131	1	3.65583	0.000667352	0.013852	++	AFF3|ANXA11|CD200|CD44|CHDH|CHN2|COCH|COL9A3|DUSP5|HK2|HSP90B1|IQGAP2|MAP3K5|MAPKAPK2|METTL8|PDLIM1|PHACTR2|PHF16|PIM2|PLAGL1|POLR3G|SOGA2|TGIF1|TLK1|TOX2|TSHZ1|TYMS|WDFY1|ZADH2|ZNF101|ZSCAN2|EXCLUDED_GENES:|BLNK|BMF|ETV6|FOXP1
JUBAN_TARGETS_OF_SPI1_AND_FLI1_UP	MSigDB_C2	8	114	1.90708	1.36505	7.01754	1	4.46353	0.000673221	0.0139504	+*/+*	ANKRD12|CD200|FECH|MSRB1|PCYT1A|PHTF1|TRAFD1|WDR6|EXCLUDED_GENES:|FUT8
Rat Hypothalamic_Mansuy10_1270genes (20937356-TableS1)	GeneSigDB	29	904	15.1165	3.78283	3.20796	1	3.67013	0.000680574	0.0140792	++	ARNT2|B4GALT1|CABLES1|CD200|FKBP11|GAB1|GAB2|GCDH|IGSF3|KIF13B|MAN1A1|MARCH3|MPEG1|NFKBIZ|PDCD4|PDE4B|PHACTR1|PLAC8|PPIB|RILPL2|SLC19A2|SLC2A13|STAT3|TLE1|TNFAIP8|UGCG|VASH2|VOPP1|ZADH2
KRIGE_RESPONSE_TO_TOSEDOSTAT_24HR_UP	MSigDB_C2	26	776	12.9795	3.51477	3.35052	1	3.70452	0.000683959	0.0141256	++/+*	ASPHD2|BCL3|C9ORF91|CCDC50|CD37|CD69|CHD2|CHST7|DBN1|DUSP5|EHD1|FAM100B|HCK|IVNS1ABP|LPIN2|NABP1|PCK2|PDCD4|PHACTR2|SCAPER|SLA|SLC38A2|SP100|TCF4|TGIF1|WDFY1
Human Leukemia_Haslinger04_109genes (15459216-TableA2a)	GeneSigDB	7	88	1.47259	1.20113	7.95455	1	4.60183	0.000690145	0.0142296	++	ANXA11|DLEU1|GAB1|GLO1|IL10RA|IQGAP2|TLE1
YTATTTTNR_V$MEF2_02	MSigDB_C3	24	693	11.5986	3.32992	3.4632	1	3.72422	0.00069271	0.0142588	++	AICDA|BMPR2|C18ORF25|CHD2|CNBP|CTR9|EML4|FAM100B|GYG1|IL10|IPO4|KCNA3|LYN|MARCH3|MYOCD|PDCD4|PLAGL1|RASGRF1|SIK3|SMARCA2|TLE4|TLK1|XK|ZADH2|EXCLUDED_GENES:|FOXP1|PTPN1
Mouse StemCell_Lindmark04_624genes (15474998-tableS1a)	GeneSigDB	19	492	8.23566	2.81603	3.86179	1	3.82252	0.000696092	0.0143046	++	ABCE1|CD37|FAM100B|FKBP11|HCK|HIST1H1C|HK2|IVNS1ABP|LITAF|MAPKAPK2|MARCKS|MPEG1|MSRB1|NT5DC2|PDLIM1|PRKCB|SLC38A2|SP100|TFRC|EXCLUDED_GENES:|BLNK|FOXP1|PTPN1
NFkB_Up_BCR_paper	SignatureDB	6	64	1.07017	1.02342	9.375	1	4.81703	0.000698205	0.0143051	++	ADAM8|BATF|IL10|RAB7L1|RNF183|SNX18|EXCLUDED_GENES:|IRF4
MARSON_BOUND_BY_FOXP3_UNSTIMULATED	MSigDB_C2	36	1216	20.3375	4.36079	2.96053	1	3.59167	0.000698431	0.0143051	+*	AKIRIN1|ARID3B|B4GALT1|BSPRY|C5ORF45|CCDC113|ERN1|FAM100B|GPD2|HIST1H2AC|HIVEP1|HSP90B1|IL10RA|KCNA3|LEPROTL1|NABP1|NGLY1|P2RY10|PKN3|PTPN2|PTPRJ|RDX|SH2D3C|SIK3|SMARCC1|STAT3|SUB1|TCEB3|TCF4|TGFBR2|THYN1|TOR1AIP1|TSHZ1|UBE2W|ZADH2|ZNF275|EXCLUDED_GENES:|CCND2|IRF4
ZHANG_BREAST_CANCER_PROGENITORS_DN	MSigDB_C2	9	144	2.41063	1.53521	6.25	1	4.29217	0.000733399	0.0149965	+*/+*	ATXN7L1|FNDC3A|GYG1|HCK|HSP90B1|NFKBIZ|SPATA5|TLE4|UGCG
ANTIGEN_BINDING	MSigDB_C5	4	25	0.418425	0.641233	16	1	5.58545	0.000738504	0.015076	+*	IGHM|LAG3|LILRA2|LILRA3
Human Ovarian_Helleman06_69genes (16287073-Table3)	GeneSigDB	6	65	1.08609	1.03162	9.23077	1	4.7633	0.000758521	0.0154337	++	ADPGK|B4GALT1|ITGAE|SLC43A3|SUB1|U2SURP
GNF2_TNFRSF1B	MSigDB_C4	6	65	1.08783	1.0322	9.23077	1	4.75894	0.000758521	0.0154337	+*	CNPY3|HCK|LILRA2|LILRA3|LILRA6|LILRB2
SENESE_HDAC3_TARGETS_UP	MSigDB_C2	19	496	8.29704	2.83089	3.83065	1	3.78077	0.000766334	0.015567	++/++	AKIRIN1|ATP13A3|B4GALT1|C6ORF106|CD44|CYB5R2|EIF4G1|IQGAP2|LMAN1|MAN1A1|MEX3C|NFKBIZ|PDE4B|RASGRF1|SEC61A1|SMARCC1|TFRC|TGFBR2|WDR6|EXCLUDED_GENES:|CCND2
Mouse EmbryonicStemCell_Abranches09_1170genes (19621087-Table1d)	GeneSigDB	23	657	10.9902	3.24373	3.50076	1	3.70248	0.000770869	0.0156335	++	ADAMTS6|AP3M2|ARNT2|BBIP1|BCL2|CCDC50|CELF2|DBN1|EPM2AIP1|GAB2|GPM6A|LPIN2|MARCKS|PLAGL1|PLCL2|SMARCA2|TCF4|TOX2|TSHZ1|ULK2|VASH2|VOPP1|ZMYND11|EXCLUDED_GENES:|CCND2
HAHTOLA_MYCOSIS_FUNGOIDES_SKIN_UP	MSigDB_C2	10	176	2.94293	1.69614	5.68182	1	4.16066	0.000795382	0.0160841	+*/**	ANXA11|CREB3L2|GMFG|LBH|MARCKS|PDCD4|PPIB|SLA|TCF4|THYN1|EXCLUDED_GENES:|CCND2
Human Breast_Creighton08_1024genes (18794137-SuppTable1c)	GeneSigDB	24	700	11.7113	3.34159	3.42857	1	3.6775	0.00079569	0.0160841	++	CHN2|CLINT1|CREB3L2|ELL2|EML4|FAM108C1|GNL3|LEPROTL1|LIMD1|LPIN2|LYN|MARCH3|MINA|PAK1|PIAS2|PION|PTPRJ|SLC2A13|SNX18|SUSD1|TSHZ1|UBE2W|VOPP1|WDFY1|EXCLUDED_GENES:|ETV6
YKACATTT_UNKNOWN	MSigDB_C3	13	275	4.59893	2.11272	4.72727	1	3.97642	0.000797409	0.0160926	++	ARHGAP24|BMPR2|CABLES1|CCDC50|CCL22|CHD2|ERN1|FTSJ1|KIF13B|RAP1GDS1|TLK1|TRIT1|ZBTB32|EXCLUDED_GENES:|PTPN1
OUELLET_OVARIAN_CANCER_INVASIVE_VS_LMP_UP	MSigDB_C2	8	117	1.95636	1.38351	6.83761	1	4.36832	0.00079889	0.0160962	++/**	ATP13A3|ATP1B3|CD47|COPB2|GLO1|MRPL3|NDUFV2|TARS
KIM_WT1_TARGETS_12HR_DN	MSigDB_C2	11	208	3.47971	1.84067	5.28846	1	4.08563	0.000802458	0.0161418	*+/+*	AEN|ANP32A|CD44|GNL3|IGSF3|MANF|METTL13|MINA|NOLC1|PLAC8|TGFBR2
Human Lung_Baras09_50genes_SCCvsBSM (19525979-SuppTable2)	GeneSigDB	5	44	0.735139	0.849331	11.3636	1	5.02144	0.00081126	0.0162924	++	ATP13A3|MCM2|TFRC|U2SURP|VOPP1
MORF_BUB1B	MSigDB_C4	6	66	1.10347	1.03974	9.09091	1	4.70939	0.000822783	0.0164703	+*	ABCE1|ARID3A|DLEU1|KIF14|MCM2|TARS
DIRMEIER_LMP1_RESPONSE_EARLY	MSigDB_C2	6	66	1.10271	1.04006	9.09091	1	4.70868	0.000822783	0.0164703	++	CCR7|CD69|DUSP5|FAM100B|GPR183|NFKBIZ
RIZKI_TUMOR_INVASIVENESS_3D_UP	MSigDB_C2	11	209	3.49387	1.84473	5.26316	1	4.06896	0.000834629	0.0166804	+*/++	ALG3|CD69|ECI1|EPS15L1|FTSJ1|IKZF1|LILRA4|S1PR1|TLE1|TYMS|XK|EXCLUDED_GENES:|ETV6
Human Lymphoma_Tome05_1333genes (16081686-SuppTable4)	GeneSigDB	23	661	11.0542	3.25097	3.47958	1	3.67453	0.000835986	0.0166806	+*	ANP32A|CCDC86|CLINT1|CTR9|CYB5B|EIF4G1|FTSJ1|GLO1|GNL3|IKZF1|LILRA4|MAPKAPK2|MAT2A|MCM2|MTHFD1|NDUFV2|NOLC1|OXSR1|PAK2|PNP|POLR1C|PPIB|RAB30
JUBAN_TARGETS_OF_SPI1_AND_FLI1_DN	MSigDB_C2	7	91	1.52314	1.21949	7.69231	1	4.49111	0.000843149	0.0167932	+*/+*	CARD11|CHD1|EIF4G1|NOLC1|RNASE6|SELRC1|SMARCC1
Human Lung_Hou10_1067genes (20421987-TableS1)	GeneSigDB	25	745	12.4663	3.44751	3.3557	1	3.63557	0.000844344	0.0167932	++	ADRB2|ADTRP|AFF3|C11ORF80|C7ORF23|CD47|CELF2|CFLAR|GAB1|GPM6A|KIF14|LEPREL1|LILRA2|MCM2|MYOCD|PHACTR1|PHACTR2|PION|RASGRF1|S1PR1|SH2D3C|TGFBR2|TOX2|TYMS|UCK2|EXCLUDED_GENES:|SH3BP5
ZHANG_TLX_TARGETS_60HR_DN	MSigDB_C2	13	277	4.63207	2.12326	4.69314	1	3.94107	0.000852249	0.0169232	++/+*	EIF4G1|GRWD1|HK2|HSP90B1|IVNS1ABP|MCM2|NOLC1|NT5DC2|RDX|SMC6|TYMS|UCK2|UMPS
Human Lypmhoma_Leval07_28genes (17284527-Table3)	GeneSigDB	4	26	0.433669	0.653064	15.3846	1	5.46092	0.000861343	0.0170491	+*	CCR7|CD47|SP100|SP110
VERHAAK_AML_WITH_NPM1_MUTATED_DN	MSigDB_C2	12	243	4.06678	1.99098	4.93827	1	3.98457	0.000860911	0.0170491	**/++	BPGM|CD200|CD69|FAIM3|FZD6|LOC100505650|MAN1A1|P2RX5|PDE4B|SIDT1|SPIB|UGCG|EXCLUDED_GENES:|BLNK|CCND2
Human Messina_04_1962genes_TranscriptionFactors (15489324-TableS2)	GeneSigDB	47	1747	29.2268	5.16356	2.69033	1	3.44204	0.000884206	0.0174737	+*	ADPGK|AFF3|ANP32A|ARID3A|ARID3B|ARNT2|BATF|BCL3|CHD1|CHD2|CNBP|CNPY3|CREB3L2|CSDA|GABPB1|GTF3A|HIVEP1|IKZF1|IVNS1ABP|KLF8|KLHL21|LITAF|MNDA|NFKBIB|PHF16|PHTF1|PIAS2|PLAGL1|SMARCA2|SMARCC1|SP100|SPIB|STAT3|SUB1|TCF4|TGIF1|TSHZ1|ULK2|ZBTB11|ZBTB32|ZFAT|ZMYND11|ZNF101|ZNF107|ZNF275|ZNF614|ZSCAN2|EXCLUDED_GENES:|ETV6|FOXP1|IRF4
MODULE_525	MSigDB_C4	6	67	1.12067	1.04834	8.95522	1	4.65434	0.000891164	0.0175458	+*	AEN|CD69|LBH|NFKBID|NOC3L|TLE4
MODULE_123	MSigDB_C4	12	244	4.0818	1.99336	4.91803	1	3.97229	0.000892109	0.0175458	++	ADRB2|BATF|BCL3|CHD2|GPR183|HIVEP1|MNDA|PHF16|SP100|TCEB3|TGIF1|TLE1|EXCLUDED_GENES:|ETV6
IVANOVA_HEMATOPOIESIS_LATE_PROGENITOR	MSigDB_C2	20	542	9.0683	2.95402	3.69004	1	3.70062	0.000889925	0.0175458	+*	ANKRD12|BTLA|CLINT1|CXORF21|DOCK10|ELOVL7|FTSJ1|HCK|LMAN1|MCM2|MPEG1|NEK3|PIAS2|SLC33A1|SLC38A5|STAMBPL1|TFRC|TLK1|UBE2W|USP46
GNF2_CD1D	MSigDB_C4	5	45	0.751644	0.859296	11.1111	1	4.94399	0.000900289	0.0176505	+*	HCK|LILRA3|LILRA6|LILRB2|PLBD1
Myeloma_MF_subgroup_DN	SignatureDB	5	45	0.75184	0.859358	11.1111	1	4.94341	0.000900289	0.0176505	++/++	CREB3L2|MTDH|SCAPER|TNFAIP8|ZNF275
Human Breast_Liu07_186genes (17229949-TableS4)	GeneSigDB	10	179	2.99281	1.71182	5.58659	1	4.09342	0.000905327	0.0177212	+*	ATP13A3|BCL2|COPB2|DNMT3A|ELL2|ERN1|IER5|PAK2|STAM|VOPP1
NIKOLSKY_BREAST_CANCER_1Q32_AMPLICON	MSigDB_C2	3	12	0.201118	0.444875	25	1	6.29139	0.000913301	0.017849	+*	FAIM3|IL10|MAPKAPK2
BCL6_targets_CHIPCHIP	SignatureDB	18	465	7.7811	2.73353	3.87097	1	3.73835	0.000929039	0.018128	+*	AP3B1|ARID3B|BMPR2|CARD11|CDYL|CYB5B|FNDC3A|GAB1|GMFG|HSP90B1|IQGAP2|IRF2BP2|LRRC33|SUB1|TARS|TNFAIP8|TOR1AIP1|WDR6|EXCLUDED_GENES:|PIM1
STK33_SKM_DN	MSigDB_C6	13	280	4.68455	2.13195	4.64286	1	3.9004	0.000940423	0.0183212	++/++	AFF3|BCL2|BTLA|C7ORF23|CHML|FAM46C|GPX7|LILRA2|MARCKS|MOCOS|SPIB|TNFAIP8|TRIT1
Human Leukemia_Kiiveri08_100genes_MLLTree (18410693-TableS6)	GeneSigDB	6	68	1.13677	1.05662	8.82353	1	4.60266	0.000963837	0.0187478	++	CD44|MAP3K5|PDE4B|SRPRB|ST3GAL5|TCF4
APOPTOSIS_GO	MSigDB_C5	17	428	7.15464	2.62932	3.97196	1	3.74445	0.000966506	0.0187702	+*	AVEN|BCL2|BCL2L10|BCL3|C16ORF5|CASP10|CFLAR|ERN1|FAIM3|GCLC|GLO1|HSP90B1|IL12A|IL2RA|MAP3K5|PLAGL1|TNFAIP8|EXCLUDED_GENES:|BMF|PIM1
RNA_METABOLIC_PROCESS	MSigDB_C5	27	838	14.0175	3.65135	3.22196	1	3.55553	0.000970417	0.0188167	+*	ABCE1|CHD1|CHD2|CNBP|CSDA|ELL2|GTF3A|IVNS1ABP|LIMD1|LITAF|NOLC1|PLAGL1|POLR1C|POLR3G|RNASE6|RRP9|SMARCA2|SMARCC1|SP100|SPIB|STAT3|SUB1|TCEB3|TCF4|TGIF1|ZBTB32|ZMYND11
TIEN_INTESTINE_PROBIOTICS_24HR_DN	MSigDB_C2	11	213	3.55981	1.86057	5.16432	1	3.99888	0.000974204	0.0188311	+*/+*	FNDC3A|HOOK1|HSP90B1|LPIN2|MANF|MTDH|PCK2|PDCD4|PPIB|ST6GALNAC4|TMEM39A
KIM_WT1_TARGETS_UP	MSigDB_C2	11	213	3.56169	1.86394	5.16432	1	3.99064	0.000974204	0.0188311	++/++	ABHD10|ATP13A3|BMPR2|CD44|DUSP5|IL2RA|KCTD5|LBH|LITAF|PMM2|ST3GAL5|EXCLUDED_GENES:|SH3BP5
EINAV_INTERFERON_SIGNATURE_IN_CANCER	MSigDB_C2	4	27	0.450759	0.665382	14.8148	1	5.33414	0.000997901	0.0189547	+*	OAS1|SP100|SP110|TGIF1
HOLLEMAN_VINCRISTINE_RESISTANCE_ALL_UP	MSigDB_C2	4	27	0.451741	0.666217	14.8148	1	5.32598	0.000997901	0.0189547	+*/**	CREB3L2|KIAA0226L|LBH|TCEB3
GNF2_LYN	MSigDB_C4	4	27	0.452069	0.666694	14.8148	1	5.32168	0.000997901	0.0189547	+*	CNPY3|ERP29|LYN|SP110
Human Leukemia_Wilson06_50genes_SigDifferentialClusterB2 (16597596-TableS2-2)	GeneSigDB	5	46	0.767622	0.867607	10.8696	1	4.87822	0.000996385	0.0189547	+*	CNPY3|DLEU1|GCLC|KLHL21|RAC2
Myeloma_CD-2_subgroup_DN	SignatureDB	5	46	0.767992	0.868701	10.8696	1	4.87165	0.000996385	0.0189547	++/+*	AVEN|HIST1H1C|HK2|POLR3G|UCK2
ZHAN_MULTIPLE_MYELOMA_CD2_DN	MSigDB_C2	5	46	0.769125	0.86902	10.8696	1	4.86856	0.000996385	0.0189547	++/+*	AVEN|HIST1H1C|HK2|POLR3G|UCK2
TAKEDA_TARGETS_OF_NUP98_HOXA9_FUSION_3D_UP	MSigDB_C2	10	181	3.02682	1.71795	5.52486	1	4.05902	0.000985327	0.0189547	++/**	ACSM3|ARHGEF3|CCL18|CD69|HIST1H2AC|IGHM|OAS1|RNASE6|SOGA2|SP110
Human Sarcoma_Lee04_335genes (15492233-TableS1)	GeneSigDB	14	317	5.30051	2.26709	4.4164	1	3.83729	0.000984518	0.0189547	++	ACSM3|ANXA11|BPGM|CHN2|COCH|DLEU1|EPHB1|ERP29|FAIM3|GLO1|IQGAP2|MAPKAPK2|PAK2|UMPS
PROGRAMMED_CELL_DEATH	MSigDB_C5	17	429	7.17416	2.6306	3.9627	1	3.73521	0.000991325	0.0189547	+*	AVEN|BCL2|BCL2L10|BCL3|C16ORF5|CASP10|CFLAR|ERN1|FAIM3|GCLC|GLO1|HSP90B1|IL12A|IL2RA|MAP3K5|PLAGL1|TNFAIP8|EXCLUDED_GENES:|BMF|PIM1
Human Lung_Ma08_708genes (18440302-SuppTable2)	GeneSigDB	18	468	7.83004	2.75161	3.84615	1	3.696	0.000998985	0.0189547	++	AFF3|ATP13A3|CD44|CHML|CHST2|DUSP5|ELOVL7|FTSJ1|GLO1|HK2|IVNS1ABP|KIF13B|NT5DC2|PIAS2|RDX|TFRC|TGFBR2|TOX2
Human Breast_Vincent-Salomon08_1001genes (18381933-SuppTableS4)	GeneSigDB	26	796	13.3145	3.56038	3.26633	1	3.56297	0.000987333	0.0189547	++	ATP1B3|BCL2|C5ORF45|CKAP4|CTR9|DCTD|FA2H|KCTD5|KIF13B|KLHL21|MARCKS|NT5DC2|PEBP1|PION|SEC61B|SELRC1|SIK3|SMARCA2|SMC6|SP110|SUB1|TFRC|TLE1|TNFAIP8|U2SURP|WDR6|EXCLUDED_GENES:|FOXP1|FUT8
TTGTTT_V$FOXO4_01	MSigDB_C3	53	2049	34.2751	5.55863	2.58663	1	3.36863	0.00100939	0.0191227	++	ADTRP|AFF3|BCL2|BMPR2|C6ORF106|CCDC50|CHD1|CHD2|CHN2|CKAP4|CLINT1|COCH|CTR9|CXORF21|EHD1|EIF4G1|ELL2|GAB2|GPM6A|HIVEP1|HOOK1|ITGAE|KLF8|LAG3|MAN1A1|MANF|MARCH3|MARCKS|MAT2A|MYOCD|PDCD4|PHF16|PIM2|PKN3|POLR1C|RAB30|RNF138|S1PR1|SIK3|SLC19A2|SLC38A2|SMARCA2|SNX18|STAT3|TBL1XR1|TCF4|TGIF1|TLE1|TLK1|UBE2W|ULK2|ZADH2|ZSCAN2|EXCLUDED_GENES:|BMF|ENTPD1|FOXP1|IRF4|PIM1|SH3BP5
WIERENGA_STAT5A_TARGETS_UP	MSigDB_C2	11	214	3.57865	1.86571	5.14019	1	3.97776	0.00101196	0.0191421	+*/**	CCL22|CCR7|CKAP4|COCH|DUSP5|GNPTAB|LEPREL1|MTHFD1|PHACTR1|ST3GAL5|TLE4|EXCLUDED_GENES:|CCND2|PIM1
MODULE_5	MSigDB_C4	17	430	7.19341	2.63452	3.95349	1	3.72234	0.00101669	0.0192022	++	CCL18|CD37|CD44|GMFG|GYG1|HCK|IGHM|LYN|MNDA|PNP|RAC2|SFTPB|SLA|ST6GALNAC4|STAT3|TGFBR2|UGCG|EXCLUDED_GENES:|PIM1
GNF2_HCK	MSigDB_C4	7	94	1.57281	1.2398	7.44681	1	4.37746	0.00102174	0.0192683	+*	HCK|LILRA2|LILRA3|LILRA6|LILRB2|MNDA|PLBD1
LI_WILMS_TUMOR_VS_FETAL_KIDNEY_1_UP	MSigDB_C2	10	182	3.04288	1.72354	5.49451	1	4.03653	0.00102745	0.0193463	++/**	ACSM3|BPGM|IQGAP2|KIF13B|LYN|SP100|TGFBR2|TNFAIP8|TRAM2|UGCG
Human Leukemia_Kiiveri08_100genes_E2A-PBX1Tree (18410693-TableS4)	GeneSigDB	6	69	1.15265	1.06371	8.69565	1	4.55703	0.00104098	0.0195417	++	GNPTAB|IGSF3|MAPKAPK2|PNP|SOGA2|THYN1
PID_VEGFR1_2_PATHWAY	MSigDB_C2	6	69	1.15433	1.06457	8.69565	1	4.55177	0.00104098	0.0195417	++	GAB1|MAPKAPK2|PAK2|PRKCB|PTPN2|PTPRJ
SWEET_LUNG_CANCER_KRAS_DN	MSigDB_C2	17	431	7.20769	2.63733	3.94432	1	3.71296	0.0010426	0.0195424	++/++	ADRB2|ARHGEF3|BPGM|CD47|FAM46C|GYG1|HCK|MARCKS|NT5DC2|PDLIM1|S1PR1|SMARCA2|SPIB|TCF4|TFRC|TM2D3|ZMYND11|EXCLUDED_GENES:|SH3BP5
Rat Prostate_Reyes05_189genes (15486989-table2)	GeneSigDB	8	122	2.03973	1.4126	6.55738	1	4.21935	0.00104968	0.0196453	++	ADPRH|CACNA1D|CD44|ERP29|GPD2|PDE4B|TCEB3|TOR1AIP1
Human StemCell_Amundson08_990genes (18199535-SuppTable1)	GeneSigDB	29	930	15.5494	3.83392	3.11828	1	3.50832	0.0010542	0.0197001	++	AP3B1|BCL2|CD37|CHD1|CHD2|CHML|COCH|ELL2|FZD6|GCDH|GPD2|HCK|HSP90B1|IQGAP2|MAN1A1|MNDA|NEK3|PDCD4|PLAGL1|PLK3|PMM2|RAB7L1|RDX|S1PR1|SACS|SLA|SMARCA2|TLE4|XK|EXCLUDED_GENES:|CCND2|ENTPD1|PTPN1
GRAESSMANN_APOPTOSIS_BY_SERUM_DEPRIVATION_UP	MSigDB_C2	20	550	9.19752	2.9767	3.63636	1	3.62901	0.00106221	0.0197626	++/*+	AEN|AICDA|ARMC7|C9ORF91|EBNA1BP2|ERN1|FNDC3A|HEATR6|IVNS1ABP|LOC645638|PARP3|PLAGL1|PNP|SP100|SP110|SPATA5|TOR1AIP1|TRAFD1|TRAM2|ZBTB32
CREIGHTON_ENDOCRINE_THERAPY_RESISTANCE_3	MSigDB_C2	24	715	11.9607	3.38089	3.35664	1	3.56099	0.00106207	0.0197626	++	CHN2|CLINT1|CREB3L2|ELL2|EML4|FAM108C1|GNL3|LEPROTL1|LIMD1|LPIN2|LYN|MARCH3|MINA|PAK1|PIAS2|PION|PTPRJ|SLC2A13|SNX18|SUSD1|TSHZ1|UBE2W|VOPP1|WDFY1|EXCLUDED_GENES:|ETV6
NUYTTEN_EZH2_TARGETS_DN	MSigDB_C2	31	1019	17.0414	4.01628	3.0422	1	3.47552	0.00106234	0.0197626	++/+*	ANP32A|COCH|CYB5B|EHHADH|FAM108C1|FZD6|GPD2|GYG1|HOOK1|IRF2BP2|KIF14|LEPROTL1|MCM2|NDUFV2|NOC3L|NT5DC2|PAK2|PCK2|PEBP1|RNF138|SIDT1|SLC43A3|SP100|SRPRB|TBL1XR1|TFRC|THYN1|TLK1|TYMS|UMPS|XK
Mouse Leukemia_Torchia07_928genes (17875932-TableS4)	GeneSigDB	20	551	9.21262	2.97691	3.62976	1	3.62368	0.00108564	0.0201658	++	ATXN7L1|CELF2|DNMT3A|DOCK10|ELL2|FKBP11|FNBP1L|HK2|HOOK1|IQGAP2|MARCH3|PAK1|PDE4B|PDLIM1|PLAC8|POLR3G|PTPRJ|SP100|TNFRSF13B|VOPP1
Human Leukemia_Falt05_50genes_UpRegulatedLgUnmutatedNon-VH3 (15817677-TableS2b)	GeneSigDB	5	47	0.785493	0.877973	10.6383	1	4.80027	0.00109989	0.0203389	+*	ADTRP|GLO1|GTF3A|PLCL2|ZMYND11
PID_IL6_7PATHWAY	MSigDB_C2	5	47	0.787606	0.878398	10.6383	1	4.79554	0.00109989	0.0203389	+*	GAB1|GAB2|HCK|HSP90B1|STAT3
Human Lung_not_cancer_Lockstone10_50genes (20194811-Figure1b)	GeneSigDB	5	47	0.787505	0.879844	10.6383	1	4.78777	0.00109989	0.0203389	+*	HCK|IL10RA|MPEG1|RNASE6|SLAMF7
Rat Brain_Greco09_425genes (19305503-TableS1)	GeneSigDB	16	395	6.60719	2.52744	4.05063	1	3.71634	0.00110234	0.0203538	++	ANXA11|CHN2|ECI1|GCLC|GYG1|LITAF|LMAN1|MTHFD1|PDE4B|PECR|PPIB|RILPL2|S1PR1|SCAMP2|STAT3|TGIF1
Human Breast_Reyal08_159genes (19014521-TableS6b)	GeneSigDB	9	153	2.55755	1.58171	5.88235	1	4.0731	0.00112744	0.0207554	++	CD37|CD44|IGHM|KIF13B|MNDA|OAS1|PAK2|PRKCB|TFRC|EXCLUDED_GENES:|IRF4
TGTATGA,MIR-485-3P	MSigDB_C3	9	153	2.56295	1.58341	5.88235	1	4.06532	0.00112744	0.0207554	++	C6ORF106|CDYL|GPM6A|IVNS1ABP|MAPKAPK2|PTPN2|TMEM184B|UBE2E3|ULK2
WONG_MITOCHONDRIA_GENE_MODULE	MSigDB_C2	11	217	3.63087	1.88236	5.06912	1	3.91484	0.00113254	0.0208181	+*	ATP13A3|ATP1B3|BCL2|CHDH|ECI1|GCDH|GPD2|MRPL3|NDUFV2|PCK2|TOMM70A
MARSHALL_VIRAL_INFECTION_RESPONSE_DN	MSigDB_C2	4	28	0.470281	0.679802	14.2857	1	5.19227	0.00114898	0.0210891	**/+*	GABPB1|NFKBIB|PDLIM1|TGIF1|EXCLUDED_GENES:|PIM1
KEGG_FC_GAMMA_R_MEDIATED_PHAGOCYTOSIS	MSigDB_C2	7	96	1.606	1.25397	7.29167	1	4.30154	0.00115644	0.0211946	++	GAB2|HCK|LYN|MARCKS|PAK1|PRKCB|RAC2
RHEIN_ALL_GLUCOCORTICOID_THERAPY_DN	MSigDB_C2	15	360	6.02777	2.41687	4.16667	1	3.71234	0.00118139	0.0216198	++/+*	ANP32A|BCL2|CNBP|DCTD|GLO1|GPX7|IVNS1ABP|MCM2|MRPL3|MTHFD1|PAK2|PDLIM1|PHF16|PTPLA|TYMS|EXCLUDED_GENES:|BLNK
Human Breast_Creighton08_772genes (18794137-SuppTable1a)	GeneSigDB	19	515	8.60909	2.87839	3.68932	1	3.60997	0.00118947	0.0217354	++	AFF3|ARHGAP24|BATF|BBIP1|BCL2|EPS15L1|GTF3A|MAPKAPK2|MEX3C|MTHFD1|PCK2|PDCD4|PTPLA|RAB30|RAB7L1|SLC38A2|TET2|THYN1|UBA5|EXCLUDED_GENES:|FUT8|SH3BP5
Human Lung_Dauer05_50genes_OverExpressed (15735721-Table1)	GeneSigDB	5	48	0.803038	0.886342	10.4167	1	4.73515	0.00121115	0.0219695	+*	BCL3|DUSP5|STAT3|TMEM184B|UGCG
Human BoneMarrow_Zhan07_52genes (17023574-Table2)	GeneSigDB	5	48	0.802245	0.886916	10.4167	1	4.73298	0.00121115	0.0219695	+*	ATP13A3|AVEN|HIST1H1C|HIST1H2AC|PDE4B
ZHAN_MULTIPLE_MYELOMA_LB_UP	MSigDB_C2	5	48	0.801702	0.888017	10.4167	1	4.72772	0.00121115	0.0219695	+*/**	ADTRP|ARNT2|CFLAR|P2RX5|PARP15
DANG_REGULATED_BY_MYC_UP	MSigDB_C2	6	71	1.18639	1.07883	8.4507	1	4.46188	0.00120941	0.0219695	+*/*+	RRP9|TFRC|TLE4|TYMS|UCK2|UMPS
Human Pancreas_Qian05_94genes (15958547-SuppTable3)	GeneSigDB	6	71	1.18779	1.07987	8.4507	1	4.45627	0.00120941	0.0219695	+*	AP3B1|CD44|LMAN1|MAT2A|SMARCA2|TYMS
V$NFKB_Q6	MSigDB_C3	12	253	4.23246	2.03139	4.74308	1	3.82375	0.00121773	0.0220565	+*	ATP1B3|BCL3|CXORF21|ERN1|IER5|IL2RA|NFKBIB|NFKBID|P2RY10|PTPRJ|SPIB|ZADH2|EXCLUDED_GENES:|BMF
KEGG_PYRIMIDINE_METABOLISM	MSigDB_C2	7	97	1.62102	1.25914	7.21649	1	4.27196	0.00122881	0.0221921	+*	DCTD|PNP|POLR1C|POLR3G|TYMS|UCK2|UMPS|EXCLUDED_GENES:|ENTPD1
BYSTRYKH_HEMATOPOIESIS_STEM_CELL_QTL_CIS	MSigDB_C2	8	125	2.09229	1.43026	6.4	1	4.13052	0.00122802	0.0221921	+*	ADPGK|GLO1|LITAF|NABP1|ST6GALNAC4|TCEB3|TM2D3|ZNF275|EXCLUDED_GENES:|CCND2
REGULATION_OF_DEVELOPMENTAL_PROCESS	MSigDB_C5	17	438	7.32068	2.6573	3.88128	1	3.64254	0.00124019	0.0223651	+*	AVEN|BCL2|BCL2L10|BCL3|C16ORF5|CASP10|CFLAR|ERN1|FAIM3|FGD2|GCLC|GLO1|HSP90B1|IL12A|MAP3K5|PLAGL1|TNFAIP8|EXCLUDED_GENES:|PIM1
PEDERSEN_METASTASIS_BY_ERBB2_ISOFORM_7	MSigDB_C2	16	400	6.68857	2.54177	4	1	3.66337	0.00125536	0.0226057	+*	BATF|C19ORF10|CACNA1D|CD44|CFLAR|ECI1|EHD1|HK2|IER5|KCTD5|MTHFD1|SP100|SUSD1|THYN1|TYMS|UBE2E3|EXCLUDED_GENES:|SH3BP5
GRAESSMANN_RESPONSE_TO_MC_AND_DOXORUBICIN_DN	MSigDB_C2	25	767	12.8284	3.49905	3.25945	1	3.47856	0.00126458	0.0227386	++/+*	ABCE1|ALG3|AP3M2|BCL3|C9ORF91|CD200|CD44|CYB5B|DBN1|ERCC6L2|FKBP11|IVNS1ABP|MCM2|MRPL3|NOLC1|PIAS2|RILPL2|SELRC1|SRPRB|STAMBPL1|TARS|TCTN3|TFRC|TMEM39A|TYMS|EXCLUDED_GENES:|FOXP1
Human Lung_Olejniczak07_80genes (17426248-TableS2b)	GeneSigDB	6	72	1.20509	1.08697	8.33333	1	4.41124	0.00130107	0.0233607	+*	BCL2|FECH|LMAN1|TCF4|TSHZ1|ZADH2
ZWANG_CLASS_3_TRANSIENTLY_INDUCED_BY_EGF	MSigDB_C2	11	221	3.69454	1.89699	4.97738	1	3.85109	0.00131149	0.0235137	+*	BCL3|CSNK1E|DUSP5|ELL2|FNDC3A|GABPB1|NFKBIZ|PLAC8|TFRC|TGIF1|UGCG
Cell_cycle_Cho	SignatureDB	19	520	8.69996	2.89232	3.65385	1	3.56117	0.00132937	0.0237998	++	CHD2|COPB2|DUSP5|FASTKD1|HIST1H2AC|IKZF1|IL10|KIF14|MAT2A|MTHFD1|NEK3|OXSR1|PCK2|RNF138|SLC33A1|TLE4|TRIT1|TSHZ1|UBE2E3|EXCLUDED_GENES:|FOXP1|FUT8|SH3BP5
DELYS_THYROID_CANCER_UP	MSigDB_C2	17	441	7.37717	2.66922	3.85488	1	3.60511	0.00133412	0.0238503	++/*+	ATP1B3|CCL18|CD44|CHST2|DUSP5|IGSF3|IL10RA|LYN|MAP3K5|MNDA|PDLIM1|PLK3|PNP|RNASE6|SFTPB|ST3GAL5|STAM|EXCLUDED_GENES:|CCND2|ENTPD1
Human Pancreas_Nakamura07_1222genes (17699763-SuppTable1)	GeneSigDB	27	857	14.3338	3.68919	3.15053	1	3.43333	0.00134273	0.0239349	++	ANP32A|ARNT2|BCL3|CHST2|CREB3L2|DHRS13|EBNA1BP2|ENOSF1|EPM2AIP1|FA2H|FAM108C1|FNDC3A|HIST1H2AC|HK2|IGSF3|LITAF|NABP1|OAS1|PDCD4|PDE4B|PLAGL1|PNP|RAB30|SLC33A1|TCF4|TESC|UGCG
KEGG_OLFACTORY_TRANSDUCTION	MSigDB_C2	0	389	6.50709	2.50959	0	0	-2.59289	0.00134205	0.0239349	--
V$LEF1_Q6	MSigDB_C3	12	256	4.28189	2.04099	4.6875	1	3.78155	0.00134602	0.0239592	++	AFF3|CHD2|CHN2|FNBP1L|HIVEP1|IVNS1ABP|PAK1|PIM2|PTPRJ|SMARCC1|TGIF1|TUBB4A|EXCLUDED_GENES:|ETV6|PIM1|SH3BP5
Human Manning02_624genes_ProteinKinases (12471243-TableS2)	GeneSigDB	15	365	6.10389	2.43416	4.10959	1	3.6547	0.00135358	0.0240591	++	BMPR2|CDKL1|HCK|LYN|MAP3K5|MAPKAPK2|MLKL|NEK3|PAK1|PAK2|PIM2|PKN3|PLK3|TLK1|ULK2|EXCLUDED_GENES:|PIM1
KARLSSON_TGFB1_TARGETS_UP	MSigDB_C2	8	127	2.12411	1.44179	6.29921	1	4.07541	0.00135975	0.0240995	+*/*+	ABCE1|CD44|CSDA|EIF4G1|GNL3|IDH3A|NOLC1|TOMM70A
RASHI_RESPONSE_TO_IONIZING_RADIATION_2	MSigDB_C2	8	127	2.12431	1.4424	6.29921	1	4.07355	0.00135975	0.0240995	+*	GAB1|HIVEP1|MAPKAPK2|NFKBIB|NFKBIZ|PDE4B|STAT3|TGIF1
PROTEIN_KINASE_CASCADE	MSigDB_C5	13	292	4.88003	2.17802	4.45205	1	3.72815	0.00137335	0.0243057	++	ADRB2|BCL3|CFLAR|IL12A|LITAF|LYN|MAP3K5|MAPKAPK2|OXSR1|PAK1|SH2D3C|STAT3|VOPP1
chr3q21	MSigDB_C1	7	99	1.65649	1.27449	7.07071	1	4.19266	0.00138416	0.024462	+*	ACPP|CNBP|EPHB1|MCM2|MRPL3|PARP15|SEC61A1
V$CETS1P54_01	MSigDB_C3	12	257	4.29519	2.04249	4.66926	1	3.77226	0.00139119	0.0245512	+*	CHD2|CTR9|EBNA1BP2|LAG3|MAPKAPK2|MRPL3|NFKBID|NOSIP|SPIB|TOMM70A|UBA5|ZBTB11|EXCLUDED_GENES:|BLNK
GAVIN_FOXP3_TARGETS_CLUSTER_P3	MSigDB_C2	9	158	2.64002	1.60656	5.6962	1	3.95877	0.00141124	0.0248342	++	ACPP|CD47|FAIM3|GPD2|IGHM|IL10RA|ITGAE|PTPRJ|TGIF1|EXCLUDED_GENES:|ENTPD1
ZHANG_RESPONSE_TO_IKK_INHIBITOR_AND_TNF_UP	MSigDB_C2	11	223	3.72865	1.90571	4.93274	1	3.81556	0.00140932	0.0248342	++/*+	ANKRD12|BCL3|EHD1|ELOVL7|GCLC|HIVEP1|LYN|NFKBIZ|PION|TLE4|TNFAIP8
LTE2_UP.V1_UP	MSigDB_C6	10	190	3.17867	1.76357	5.26316	1	3.8679	0.00142032	0.0249585	++/++	CREB3L2|ENOSF1|FA2H|FAM46C|KIF13B|MAP3K5|MARCKS|PHACTR2|PLAGL1|RAB7L1
MARTENS_TRETINOIN_RESPONSE_UP	MSigDB_C2	4	840	14.0481	3.64995	0.47619	0	-2.75294	0.00143409	0.0251647	-*/+*	CCL22|IL10RA|MPEG1|TMEM184B
RESPONSE_TO_VIRUS	MSigDB_C5	5	50	0.835384	0.904151	10	1	4.60611	0.00145834	0.0255179	+*	ABCE1|BCL2|BCL3|CCL22|IVNS1ABP
Human Leukemia_Achiron07_55genes (17804543-Table2)	GeneSigDB	5	50	0.835939	0.906942	10	1	4.59132	0.00145834	0.0255179	+*	BCL2|CASP10|FAIM3|PDCD4|PLAGL1
MODULE_532	MSigDB_C4	16	406	6.78529	2.56233	3.94089	1	3.59623	0.00146232	0.0255514	++	C6ORF106|CELF2|CHD1|COCH|EPS15L1|FAM108C1|LEPROTL1|MOCOS|PLEKHG1|PTPLA|RNASE6|SLAMF7|STAMBPL1|STAT3|UGCG|ZNF107
Human Leukemia_Stam09_150genes_Figure6 (20032505-TableS8)	GeneSigDB	7	100	1.66981	1.27704	7	1	4.17387	0.00146737	0.0255673	+*	CARD11|CYB5R2|FNBP1L|KIAA0226L|KLF8|TCF4|ZNF101
Human Leukemia_Stam09_150genes_Figure5 (20032505-TableS7)	GeneSigDB	7	100	1.67281	1.2812	7	1	4.15797	0.00146737	0.0255673	+*	CARD11|CYB5R2|FNBP1L|KIAA0226L|KLF8|TCF4|ZNF101
GILMORE_CORE_NFKB_PATHWAY	MSigDB_C2	3	14	0.23399	0.479173	21.4286	1	5.77246	0.00147398	0.0256169	+*	BCL3|NFKBIB|NFKBIZ
PHONG_TNF_RESPONSE_VIA_P38_PARTIAL	MSigDB_C2	9	159	2.65719	1.61313	5.66038	1	3.932	0.00147436	0.0256169	++	B4GALT1|CD44|DLEU1|HIVEP1|KLHL21|LBH|LITAF|PLAC8|STAT3
PROTEIN_METABOLIC_PROCESS	MSigDB_C5	35	1223	20.4672	4.37223	2.86182	1	3.32388	0.0014769	0.0256252	+*	ADPRH|ADRB2|BCL3|CD37|CDK12|CDKL1|CHST7|CSNK1E|DUSP5|ERN1|ERP29|GMFG|HCK|IL10|IL12A|LMAN1|LYN|MAPKAPK2|MRPL3|MSRB1|NGLY1|OXSR1|PAK1|PAK2|PARP3|PARP4|PIM2|PKN3|PLK3|PRKCB|PTPLA|PTPN2|PTPRJ|SIK3|TLK1|EXCLUDED_GENES:|CCND2|FUT8|IRF4|PIM1
Blood_Module-1.1_Plasma_cells	SignatureDB	4	30	0.501802	0.702378	13.3333	1	4.9805	0.00149791	0.0259171	+*	C19ORF10|HSP90B1|MANF|MCM2
BIOCARTA_FAS_PATHWAY	MSigDB_C2	4	30	0.503039	0.703697	13.3333	1	4.96941	0.00149791	0.0259171	+*	CASP10|CFLAR|PAK1|PAK2
Human Leukemia_Kiiveri08_100genes_BCR-ABLParallel (18410693-TableS3)	GeneSigDB	6	74	1.2369	1.10123	8.10811	1	4.32527	0.00150021	0.0259205	+*	CASP10|CHN2|ITGAE|LIMD1|ST3GAL5|TRAM2|EXCLUDED_GENES:|CCND2
Human Ovarian_Ouellet05_137genes (15940270-Figure1D)	GeneSigDB	8	129	2.15919	1.45245	6.20155	1	4.02134	0.00150247	0.0259234	+*	ATP13A3|ATP1B3|CD47|COPB2|GLO1|MRPL3|NDUFV2|TARS
BROWNE_HCMV_INFECTION_6HR_DN	MSigDB_C2	9	160	2.67521	1.61707	5.625	1	3.91125	0.00153972	0.0265291	*+/++	ARNT2|CFLAR|ITGAE|P2RY10|PARP4|PION|S1PR1|TGIF1|TLE4
Human Breast_Bertucci06_527genes (16651414-Supp4)	GeneSigDB	15	370	6.18956	2.44719	4.05405	1	3.60022	0.00154638	0.0266068	+*	ADAM8|CACNA1D|CD47|CFLAR|CSDA|GRWD1|GYG1|IL2RA|LILRA6|LILRB2|PARVB|PIM2|PTPN2|RAB30|SIDT1|EXCLUDED_GENES:|ETV6|PIM1
Human Lymphoma_Kari03_135genes (12782714-Figure2)	GeneSigDB	7	101	1.69013	1.28536	6.93069	1	4.13103	0.00155443	0.0266341	+*	BATF|BCL2|EHD1|ITGAE|MCM2|MNDA|TLE1
Blood_Module-1.4_Undetermined	SignatureDB	7	101	1.68944	1.28603	6.93069	1	4.12943	0.00155443	0.0266341	++	CHD2|CSNK1E|DUSP5|FAM100B|PDE4B|SUB1|TFRC
Human MultipleMyeloma_Gutierrez10_178genes (20054351-TableS4)	GeneSigDB	7	101	1.68942	1.28687	6.93069	1	4.12673	0.00155443	0.0266341	++	ARID3B|CD47|GAB2|PLK3|SEC61B|UBE2E3|VOPP1|EXCLUDED_GENES:|CCND2|PIM1
PETROVA_ENDOTHELIUM_LYMPHATIC_VS_BLOOD_UP	MSigDB_C2	8	130	2.17257	1.45879	6.15385	1	3.99471	0.00157816	0.026966	++/*+	CD200|DUSP5|GAB1|GMFG|IQGAP2|LYN|PDLIM1|PNP
CHARAFE_BREAST_CANCER_LUMINAL_VS_MESENCHYMAL_UP	MSigDB_C2	17	448	7.49126	2.68976	3.79464	1	3.53517	0.00157696	0.026966	++/++	BBIP1|BSPRY|C11ORF80|C9ORF91|CACNA1D|CHD2|CHN2|DDI2|DHRS13|ERP29|FA2H|FAM46C|HOOK1|PCK2|PDCD4|SCAMP2|SIDT1|EXCLUDED_GENES:|BLNK
LU_AGING_BRAIN_UP	MSigDB_C2	12	261	4.36507	2.05956	4.5977	1	3.70707	0.00158458	0.0270384	++/++	BCL2|CREB3L2|GAB2|HIST1H2AC|LITAF|MAP3K5|RDX|S1PR1|TGFBR2|TGIF1|TLE4|TOR1AIP1
ZHAN_MULTIPLE_MYELOMA_CD1_AND_CD2_DN	MSigDB_C2	5	51	0.851939	0.914986	9.80392	1	4.53347	0.00159498	0.0271199	*+/+*	ANP32A|ARHGEF3|HIST1H2AC|P2RX5|TCF4
Human pancreas_Miyake06_52genes (16699793-Table1)	GeneSigDB	5	51	0.852995	0.914798	9.80392	1	4.53325	0.00159498	0.0271199	+*	DCTD|MTHFD1|TYMS|UCK2|UMPS
EGFR_UP.V1_UP	MSigDB_C6	10	193	3.22897	1.77422	5.18135	1	3.81634	0.00159593	0.0271199	++/++	ARNT2|BCL3|CCL22|DUSP5|ELL2|HK2|MAP3K5|PDE4B|PLAGL1|TNFAIP8
MULLIGHAN_NPM1_SIGNATURE_3_DN	MSigDB_C2	9	161	2.69302	1.62258	5.59006	1	3.887	0.00160739	0.0272771	*+/+*	ARID3B|C7ORF23|CD200|CHST7|DUSP5|EHD1|PDE4B|RRP9|TGFBR2
Mouse StemCell_Lindmark04_950genes (15474998-tableS1b)	GeneSigDB	24	738	12.3405	3.42951	3.25203	1	3.39974	0.00161955	0.0274458	++	ADPRH|AP3B1|CD44|CD47|CNBP|HCK|HIST1H1C|IVNS1ABP|KLHL21|LITAF|MCM2|MPEG1|MSRB1|PARL|PCK2|PDLIM1|RAC2|RDX|SEC61B|SLC38A2|ST3GAL5|TARS|TCF4|ZMYND11|EXCLUDED_GENES:|BLNK|PTPN1
Mouse StemCell_Ulloa-Montoya07_800genes (17683608-TableS3)	GeneSigDB	23	696	11.6405	3.33616	3.3046	1	3.40496	0.00164003	0.0277548	++	B4GALT1|BMPR2|CKAP4|CREB3L2|FECH|FKBP11|GYG1|HIST1H1C|HSP90B1|IPO4|LITAF|LMAN1|MAPKAPK2|NFKBIZ|PCYT1A|PLCL2|PTPLA|RAB30|SLC33A1|SMARCA2|TGFBR2|TRAM2|ZMYND11|EXCLUDED_GENES:|CCND2|SH3BP5
CHAUHAN_RESPONSE_TO_METHOXYESTRADIOL_DN	MSigDB_C2	7	102	1.70669	1.2938	6.86275	1	4.09128	0.00164546	0.0277708	**/+*	CSNK1E|ERP29|HSP90B1|LITAF|MARCKS|PDLIM1|PIM2
Human StemCell_Ehrchen07_102genes (17018861-TableS1)	GeneSigDB	7	102	1.70721	1.2941	6.86275	1	4.08995	0.00164546	0.0277708	++	GCLC|GLO1|HSP90B1|IL10|LILRA2|MAN1A1|SLA
Human Leukemia_Alcalay05_160genes (15831697-TableS3)	GeneSigDB	8	131	2.18989	1.46244	6.10687	1	3.97289	0.00165683	0.0278487	++	BPGM|CD200|FECH|MAN1A1|P2RX5|SIDT1|TESC|XK
Human Breast_Huang07_161genes (17332353-Table2)	GeneSigDB	8	131	2.18952	1.46322	6.10687	1	3.97102	0.00165683	0.0278487	++	ELL2|EPS15L1|LEPREL1|LYN|PDCD4|RAC2|TGFBR2|UBE2E3
Human Breast_Creighton08_952genes (18757322-TableS2)	GeneSigDB	8	131	2.19232	1.46357	6.10687	1	3.96817	0.00165683	0.0278487	+*	ABCE1|DBN1|NOC3L|NOLC1|PDCD11|PMM2|RRP9|TSEN2
MCL_gt_SLL_DLBCL	SignatureDB	4	31	0.519368	0.714175	12.9032	1	4.87364	0.00169736	0.0283757	+*	CCDC50|MARCKS|SP100|TGFBR2
PID_P38ALPHABETAPATHWAY	MSigDB_C2	4	31	0.518675	0.714704	12.9032	1	4.871	0.00169736	0.0283757	+*	HCK|LYN|PAK1|PAK2
Human Breast_Wang04_36genes (15548681-Table3)	GeneSigDB	4	31	0.519536	0.714555	12.9032	1	4.87081	0.00169736	0.0283757	+*	CFLAR|MCM2|PNP|UCK2
MOHANKUMAR_TLX1_TARGETS_UP	MSigDB_C2	16	412	6.88718	2.57823	3.8835	1	3.53452	0.00169729	0.0283757	++/*+	ATP1B3|BCL2|C6ORF106|COPB2|CYB5B|HIST1H1C|HOOK1|HSP90B1|IDH3A|LITAF|MAT2A|MTHFD1|NOLC1|PARL|PHTF1|PLBD1|EXCLUDED_GENES:|FUT8
VILIMAS_NOTCH1_TARGETS_UP	MSigDB_C2	5	52	0.868961	0.923268	9.61538	1	4.47436	0.0017408	0.0288679	+*/**	CARD11|CCR7|CD69|IL10RA|P2RY10
BOYAULT_LIVER_CANCER_SUBCLASS_G23_UP	MSigDB_C2	5	52	0.869471	0.923189	9.61538	1	4.4742	0.0017408	0.0288679	+*/**	COCH|MCM2|TFRC|TYMS|XK
Human Breast_Cicatiello04_52genes (15171711-Table3)	GeneSigDB	5	52	0.870237	0.92486	9.61538	1	4.46529	0.0017408	0.0288679	+*	MCM2|NOLC1|PNP|PPIB|SEC61B
DUTERTRE_ESTRADIOL_RESPONSE_6HR_UP	MSigDB_C2	11	229	3.83232	1.92899	4.80349	1	3.71577	0.0017393	0.0288679	++/*+	ABCE1|BCL2|CD44|GAB2|IL17RB|MCM2|MOCOS|NOLC1|PDCD11|SLC19A2|UGCG
Human StemCell_Macaulay07_516genes (17192395-TableS2b)	GeneSigDB	18	492	8.22877	2.81748	3.65854	1	3.46807	0.00173872	0.0288679	++	ANXA11|BATF|C16ORF5|CD69|CDKL1|CNPY3|FNBP1L|GMFG|GPD2|GPX7|MANF|PDLIM1|PLAC8|PMM2|PPIB|PTPLA|SCAMP2|SLA|EXCLUDED_GENES:|FUT8
BLALOCK_ALZHEIMERS_DISEASE_DN	MSigDB_C2	35	1235	20.6555	4.39443	2.83401	1	3.26425	0.00173796	0.0288679	++/++	ABCE1|ARHGEF3|ARNT2|CD200|DUSP5|FECH|GLO1|GPM6A|MAN1A1|MNDA|MRPL3|MTHFD1|NDUFV2|NETO2|NOLC1|PDE4B|PHTF1|PLCL2|PRKCB|RAP1GDS1|S1PR1|SACS|SCAPER|SEC13|SMARCA2|STAM|SUB1|TFRC|THYN1|TLK1|TM2D3|TOMM70A|UBE2E3|ULK2|XK|EXCLUDED_GENES:|CCND2
KEGG_CYTOKINE_CYTOKINE_RECEPTOR_INTERACTION	MSigDB_C2	12	264	4.41518	2.07249	4.54545	1	3.65977	0.00174372	0.0288776	+*	BMPR2|CCL18|CCL22|CCR10|CCR7|IL10|IL10RA|IL12A|IL17RB|IL2RA|TGFBR2|TNFRSF13B
PHONG_TNF_RESPONSE_NOT_VIA_P38	MSigDB_C2	14	337	5.63725	2.33723	4.1543	1	3.57806	0.00175016	0.0289454	++	BCL3|CD47|CFLAR|EHD1|HSP90B1|IER5|IGSF3|IVNS1ABP|MANF|NETO2|PION|RAC2|SP100|TNFAIP8
NUCLEUS	MSigDB_C5	39	1424	23.8124	4.69687	2.73876	1	3.23355	0.00177833	0.029372	+*	AFF3|ANP32A|ANXA11|ARNT2|BCL2|BCL3|CDK12|DNMT3A|ELL2|GNL3|HIVEP1|IVNS1ABP|KPTN|LYN|MAPKAPK2|MCM2|NOLC1|NOSIP|PDCD11|PDCD4|PKN3|POLR1C|POLR3G|RRP9|SMARCA2|SMARCC1|SP100|SP110|SP140|STAT3|SUB1|TCF4|TESC|THYN1|TLE1|TLK1|WDFY1|ZBTB32|ZMYND11
Human Breast_Rizki08_204genes (18316601-Table1)	GeneSigDB	10	196	3.27831	1.78779	5.10204	1	3.75978	0.00178875	0.0294656	+*	COPB2|CSDA|LAG3|LILRA4|MAP3K5|P2RX5|S1PR1|SP110|TLE1|XK|EXCLUDED_GENES:|ETV6
NEGATIVE_REGULATION_OF_DEVELOPMENTAL_PROCESS	MSigDB_C5	10	196	3.27874	1.78901	5.10204	1	3.75698	0.00178875	0.0294656	+*	AVEN|BCL2|BCL2L10|BCL3|CFLAR|FAIM3|GCLC|GLO1|HSP90B1|TNFAIP8|EXCLUDED_GENES:|PIM1
V$OCT1_Q6	MSigDB_C3	12	265	4.43599	2.07819	4.5283	1	3.63971	0.0017996	0.0295853	++	BCL2|GAB2|GPM6A|HIST1H2AC|LYN|MANF|PIM2|PRKCB|SPIB|TCF4|TNFRSF13B|ZBTB32|EXCLUDED_GENES:|BLNK
KRIEG_HYPOXIA_NOT_VIA_KDM3A	MSigDB_C2	24	744	12.4425	3.44916	3.22581	1	3.35082	0.0018008	0.0295853	++	ARID3B|CABLES1|CD44|DHRS13|ELL2|ENOSF1|FAM100B|FTSJ1|GAB2|GCLC|HIST1H1C|HK2|IER5|MIR155HG|NT5DC2|OXSR1|PLAGL1|RNF126|SLC38A2|SLC43A3|SOGA2|SUSD1|TNFAIP8|TYMS
Mouse DendriticCells_Bar-On10_21genes (20679228-TableS5)	GeneSigDB	3	15	0.250724	0.496417	20	1	5.53824	0.00181974	0.029665	+*	SNX18|SPIB|TCF4|EXCLUDED_GENES:|BLNK
Human Lymphoma_Shin07_15genes (17638852-Table7)	GeneSigDB	3	15	0.251031	0.496378	20	1	5.53806	0.00181974	0.029665	+*	EHD1|IL10|SLA
MARKS_HDAC_TARGETS_DN	MSigDB_C2	3	15	0.250655	0.496531	20	1	5.5371	0.00181974	0.029665	**/+*	BCL2|CFLAR|TYMS
KEGG_GLYCOSPHINGOLIPID_BIOSYNTHESIS_GANGLIO_SERIES	MSigDB_C2	3	15	0.251027	0.496581	20	1	5.5358	0.00181974	0.029665	+*	SLC33A1|ST3GAL5|ST6GALNAC4
GGGNNTTTCC_V$NFKB_Q6_01	MSigDB_C3	8	133	2.22348	1.47439	6.01504	1	3.9179	0.00182346	0.029665	++	BATF|BCL3|CCR10|CNTNAP1|EHD1|HIVEP1|IER5|IPO4|EXCLUDED_GENES:|CCND2
Human Breast_Waddell08_200genes_BRCA1trunc (18497862-TableS3)	GeneSigDB	8	133	2.22594	1.47519	6.01504	1	3.91411	0.00182346	0.029665	+*	ADRB2|DBN1|FTSJ1|LILRA4|PHTF1|TCTN3|TNFAIP8|TNFRSF13B
BROWN_MYELOID_CELL_DEVELOPMENT_UP	MSigDB_C2	9	164	2.74074	1.63618	5.4878	1	3.82552	0.00182484	0.029665	+*/**	ARHGEF3|CD44|GYG1|HCK|LOC645638|MPEG1|MSRB1|PLK3|SP100|EXCLUDED_GENES:|CCND2
LIU_CMYB_TARGETS_UP	MSigDB_C2	9	164	2.74448	1.63698	5.4878	1	3.82138	0.00182484	0.029665	++/**	BSPRY|IL17RB|LITAF|MARCH3|NOSIP|PDCD4|PEBP1|PIM2|TGIF1
BERENJENO_TRANSFORMED_BY_RHOA_UP	MSigDB_C2	19	535	8.95115	2.93581	3.5514	1	3.42286	0.00183611	0.029809	+*/++	ABCE1|ATP1B3|BPGM|CD44|CHD1|CSDA|EBNA1BP2|ELL2|GPD2|GRWD1|HK2|IVNS1ABP|MCM2|NFKBIZ|PDLIM1|TFRC|TGIF1|TOMM70A|UCK2
MORI_PRE_BI_LYMPHOCYTE_DN	MSigDB_C2	6	77	1.28808	1.12323	7.79221	1	4.19496	0.00184139	0.0298557	**/+*	AKIRIN1|ERP29|IL10RA|LYN|NFKBIZ|S1PR1
LEE_DIFFERENTIATING_T_LYMPHOCYTE	MSigDB_C2	10	197	3.29649	1.79248	5.07614	1	3.73979	0.00185706	0.0299918	++	CELF2|GMFG|GTF3A|IKZF1|PRKCB|RAC2|SLA|SP110|TNFAIP8|ZNF586
Mouse StemCell_Forsberg05_413genes (16151515-TableS1)	GeneSigDB	10	197	3.29722	1.79516	5.07614	1	3.73381	0.00185706	0.0299918	++	ADRB2|CD69|CHDH|CKAP4|GABPB1|IL10RA|IVNS1ABP|NT5DC2|PLAC8|SLC43A3|EXCLUDED_GENES:|BLNK
Human Lymphoma_Martinez-Climent03_431genes (12406872-Table4)	GeneSigDB	12	266	4.44643	2.07781	4.51128	1	3.63535	0.00185694	0.0299918	++	ADAM8|ANXA11|CD69|GLO1|MAP3K5|MSRB1|PIM2|PMM2|SACS|SEC61B|STAT3|TUBB4A
V$CEBP_Q2	MSigDB_C3	11	231	3.86483	1.93814	4.7619	1	3.68144	0.00186236	0.0300382	+*	ADRB2|CHD2|CHST7|CSNK1E|NFKBIZ|PHF16|SLC38A2|SMARCA2|STAT3|TCF4|ZADH2|EXCLUDED_GENES:|FOXP1
Human Ovarian_Wu05_54genes (15486232-Table1)	GeneSigDB	5	53	0.88559	0.932243	9.43396	1	4.41345	0.00189615	0.030464	+*	B4GALT1|BCL3|CD200|ELL2|GAB2
MARSON_FOXP3_TARGETS_DN	MSigDB_C2	5	53	0.886316	0.932615	9.43396	1	4.41091	0.00189615	0.030464	++/+*	BTLA|NABP1|NFKBID|NOLC1|TGIF1|EXCLUDED_GENES:|FOXP1
LINDSTEDT_DENDRITIC_CELL_MATURATION_B	MSigDB_C2	5	53	0.886619	0.933108	9.43396	1	4.40826	0.00189615	0.030464	++	CFLAR|HIVEP1|IL2RA|LYN|MARCKS
DARWICHE_PAPILLOMA_RISK_HIGH_VS_LOW_DN	MSigDB_C2	4	32	0.534788	0.724762	12.5	1	4.78117	0.00191451	0.0304819	**/+*	AFF3|IGHM|UCK2|ZSCAN2
Human Breast_Einav05_34genes (16007187-GeneList)	GeneSigDB	4	32	0.535398	0.724825	12.5	1	4.77991	0.00191451	0.0304819	+*	OAS1|SP100|SP110|TGIF1
REACTOME_TRANSPORT_TO_THE_GOLGI_AND_SUBSEQUENT_MODIFICATION	MSigDB_C2	4	32	0.535513	0.724821	12.5	1	4.77978	0.00191451	0.0304819	+*	B4GALT1|LMAN1|MAN1A1|SEC13|EXCLUDED_GENES:|FUT8
Mouse Skin_Darwiche07_67genes (17525749-Table1)	GeneSigDB	4	32	0.534664	0.72544	12.5	1	4.77688	0.00191451	0.0304819	+*	AFF3|EML4|UCK2|ZSCAN2
Human Liver_Li02_36genes (12136251-table5)	GeneSigDB	4	32	0.536674	0.725391	12.5	1	4.77443	0.00191451	0.0304819	+*	DUSP5|IL10RA|LITAF|SLA
AGCATTA,MIR-155	MSigDB_C3	8	134	2.24179	1.48153	5.97015	1	3.88666	0.0019116	0.0304819	++	CD47|CELF2|ELL2|PTPN2|S1PR1|SLA|TLE4|UBE2W
TGTTTAC,MIR-30A-5P,MIR-30C,MIR-30D,MIR-30B,MIR-30E-5P	MSigDB_C3	20	578	9.66234	3.0474	3.46021	1	3.39229	0.00190865	0.0304819	++	ADAMTS6|ARID3A|CELF2|CHST2|CSDA|DNMT3A|ELL2|EML4|FAM46C|FNDC3A|KCTD5|KIAA0226L|MAP3K5|MAT2A|MTDH|PHACTR2|PHF16|PTPN2|SLC38A2|VOPP1|EXCLUDED_GENES:|IRF4
Mouse Lymphoma_Wu08_1114genes (18535662-TableS1b)	GeneSigDB	18	497	8.31696	2.83132	3.62173	1	3.41997	0.00194047	0.0308554	+*	ADRB2|ANP32A|ARID3A|ATXN7L1|BCL2L10|CCDC50|CSDA|EBNA1BP2|GNL3|IL10RA|IQGAP2|LEPREL1|MTDH|NOLC1|SMC6|SUB1|TFRC|THYN1
STEIN_ESRRA_TARGETS_DN	MSigDB_C2	7	105	1.75695	1.31278	6.66667	1	3.99384	0.00194361	0.0308657	+*/++	DCTD|MARCKS|SMARCC1|TGFBR2|TNFAIP8|TRAM2|UCK2
Human StemCell_Hao09_97genes (20077526-TableS7)	GeneSigDB	6	78	1.30328	1.13085	7.69231	1	4.15326	0.00196724	0.0311212	++	ACSM3|LYN|MARCKS|SMARCA2|TBL1XR1|TLE1
RADMACHER_AML_PROGNOSIS	MSigDB_C2	6	78	1.30621	1.13157	7.69231	1	4.14805	0.00196724	0.0311212	+*	EML4|NFKBIB|S1PR1|SFTPB|TCF4|UGCG
AATGTGA,MIR-23A,MIR-23B	MSigDB_C3	16	418	6.99006	2.59962	3.82775	1	3.46587	0.00196317	0.0311212	++	ADAMTS6|CELF2|CHST7|DUSP5|FNBP1L|MAP3K5|MARCKS|MAT2A|MEX3C|PDE4B|PHACTR2|PLAGL1|TGFBR2|TGIF1|TLK1|USP46
V$MYCMAX_02	MSigDB_C3	12	268	4.48079	2.08786	4.47761	1	3.60139	0.00197613	0.0312219	+*	DCAF17|FZD6|IQGAP2|IVNS1ABP|MAT2A|METTL8|MTHFD1|NOLC1|RAB30|STAT3|TCF4|UMPS
UDAYAKUMAR_MED1_TARGETS_UP	MSigDB_C2	8	135	2.25873	1.48478	5.92593	1	3.86674	0.00200306	0.0316069	+*/*+	BPGM|CD47|EML4|FECH|MTDH|POLR3G|SUB1|ZMYND11
SCHLOSSER_SERUM_RESPONSE_DN	MSigDB_C2	23	708	11.8381	3.35962	3.24859	1	3.32238	0.00203754	0.03211	+*/++	ANP32A|BBIP1|C16ORF88|CLINT1|CYB5B|GLO1|GMFG|GPM6A|LEPROTL1|MAP3K5|MNDA|MTDH|NIPA2|OAS1|PAK2|PIM2|PLCL2|SEC13|SEC61B|SP100|SUB1|TOR1AIP1|ZMYND11|EXCLUDED_GENES:|BLNK|IRF4
SESTO_RESPONSE_TO_UV_C2	MSigDB_C2	5	54	0.90435	0.942371	9.25926	1	4.34611	0.0020614	0.0324447	++	ATP13A3|ELL2|GCLC|OAS1|UGCG
RATTENBACHER_BOUND_BY_CELF1	MSigDB_C2	17	460	7.69005	2.72273	3.69565	1	3.41935	0.00207995	0.0326951	+*	AKIRIN1|ASPHD2|C6ORF106|CDK12|CELF2|CNTNAP1|CSNK1E|ERN1|GCDH|IKZF1|RNF138|SLC25A30|SP100|TET2|TLE1|UBE2W|ZADH2
Human Leukemia_Radmacher06_157genes (16670265-TableS1)	GeneSigDB	6	79	1.3208	1.13788	7.59494	1	4.11219	0.00209949	0.0329186	+*	EML4|NFKBIB|S1PR1|SFTPB|TCF4|UGCG
PID_MET_PATHWAY	MSigDB_C2	6	79	1.31942	1.13845	7.59494	1	4.11137	0.00209949	0.0329186	++	GAB1|GAB2|PAK1|PAK2|PTPN2|PTPRJ|EXCLUDED_GENES:|PTPN1
HAMAI_APOPTOSIS_VIA_TRAIL_UP	MSigDB_C2	20	583	9.75139	3.06155	3.43053	1	3.34752	0.00210825	0.0330141	++/**	AP3B1|CELF2|CHD1|COL9A3|DOCK10|GPX7|IQGAP2|KIAA0226L|KIF14|NOC3L|RDX|SACS|SLC38A2|SMARCA2|SMC6|TCF4|U2SURP|WDR11|ZBTB11|ZNF107
CTTTGCA,MIR-527	MSigDB_C3	11	235	3.92926	1.95537	4.68085	1	3.61606	0.00212981	0.0333095	++	AKIRIN1|ANKRD12|CREB3L2|FNDC3A|GNPTAB|IDH3A|IVNS1ABP|LPCAT4|MARCKS|SMARCA2|ULK2
TRANSCRIPTION_FACTOR_BINDING	MSigDB_C5	13	307	5.13124	2.23348	4.23453	1	3.5231	0.00213593	0.033363	+*	ARNT2|BCL3|CSDA|MYOCD|NFKBIB|PDCD11|SMARCA2|SMARCC1|STAT3|SUB1|TGIF1|TLE1|ZBTB32
Human BoneMarrow_Mahtouk07_41genes (17339423-Table1)	GeneSigDB	4	33	0.552089	0.736703	12.1212	1	4.68019	0.00215015	0.0334823	+*	BCL3|C6ORF106|CCDC50|SLC25A30
Human MultipleMyeloma_Gutierrez10_37genes (20054351-TableS2)	GeneSigDB	4	33	0.551687	0.737138	12.1212	1	4.67797	0.00215015	0.0334823	+*	FNDC3A|GPD2|RAVER2|S1PR1|EXCLUDED_GENES:|CCND2|FUT8
KIM_MYC_AMPLIFICATION_TARGETS_UP	MSigDB_C2	10	201	3.36094	1.81035	4.97512	1	3.66728	0.00215168	0.0334823	+*/++	DLEU1|FASTKD1|GAB1|IDH3A|MINA|NEK3|PNP|RRP9|SACS|SLC19A2
MARTINEZ_RESPONSE_TO_TRABECTEDIN_DN	MSigDB_C2	12	271	4.53271	2.09951	4.42804	1	3.55669	0.00216661	0.0336301	**/++	C5ORF30|CFLAR|EML4|FNDC3A|MAT2A|METTL13|NOC3L|SACS|SOGA2|TBL1XR1|TGIF1|UCK2
V$MMEF2_Q6	MSigDB_C3	12	271	4.53416	2.0994	4.42804	1	3.55617	0.00216661	0.0336301	+*	AICDA|ATXN7L1|B4GALT1|CHN2|CSNK1E|EHD1|LYN|MANF|P2RX5|PDLIM1|TM2D3|TOMM70A
Human Leukemia_Messina10_16genes (20564080-Table4)	GeneSigDB	3	16	0.266927	0.511849	18.75	1	5.33961	0.00221206	0.0341254	+*	HCK|PIM2|PRKCB
Human Ovarian_Bonome08_263genes (18593951-TableS2)	GeneSigDB	11	236	3.94872	1.9615	4.66102	1	3.59485	0.00220132	0.0341254	++	ARHGAP24|IQGAP2|PCK2|PHACTR2|PLAGL1|SACS|SEC61B|SLC19A2|SP100|TM2D3|TUBB4A
Human Leukemia_Mullighan07_444genes (17597811-SuppTable2)	GeneSigDB	15	384	6.42647	2.49298	3.90625	1	3.43907	0.00221232	0.0341254	+*	ACSM3|ARID3B|C5ORF30|C7ORF23|CD200|CD47|CFLAR|CHST7|DUSP5|EHD1|MAP3K5|RRP9|SOGA2|TM2D3|VOPP1
DUTERTRE_ESTRADIOL_RESPONSE_24HR_DN	MSigDB_C2	18	503	8.41772	2.84758	3.57853	1	3.36506	0.00220826	0.0341254	+*/++	CD47|CREB3L2|DBN1|FNBP1L|GAB1|IER5|MAP3K5|MARCKS|NFKBIZ|PDLIM1|PHACTR2|PION|SOGA2|TGFBR2|TLE1|TRAM2|UBA5|ZSCAN2|EXCLUDED_GENES:|BMF
WGTTNNNNNAAA_UNKNOWN	MSigDB_C3	19	544	9.09947	2.96004	3.49265	1	3.34473	0.00221228	0.0341254	++	ADAMTS6|CCR7|CD69|CHD1|CHD2|CHML|CHN2|EPHB1|FNDC3A|HIVEP1|IL10|LEPROTL1|MANF|RDX|TBL1XR1|TCF4|TET2|TGIF1|TOX2
Human Ovarian_Baranova06_907genes_SertoliLeydig (17177833-SuppTable1)	GeneSigDB	26	844	14.1202	3.65945	3.08057	1	3.24635	0.00222839	0.0343306	++	ANKRD12|ANXA11|CD47|CDK12|CFLAR|CHML|CREB3L2|EML4|GAB1|GLO1|GPD2|HIST1H2AC|HSP90B1|LITAF|LMAN1|MAN1A1|PAK2|PDE4B|PTPN2|SCAMP2|SLC27A5|SUB1|TGFBR2|TLE4|UGCG|ZMYND11
WORSCHECH_TUMOR_REJECTION_UP	MSigDB_C2	5	55	0.920682	0.950693	9.09091	1	4.29089	0.00223691	0.0344189	+*/**	CCL22|CCR10|IGHM|IL17RB|NFKBIZ|EXCLUDED_GENES:|IRF4
chr3p21	MSigDB_C1	11	237	3.96178	1.96362	4.64135	1	3.58431	0.00227477	0.034958	+*	ACTR8|ARHGEF3|CHDH|GMPPB|GNL3|IL17RB|LIMD1|MANF|NT5DC2|RRP9|WDR6
Human Leukemia_Yukinawa06_2000genes (16872506-SuppTable1)	GeneSigDB	41	1540	25.7572	4.87249	2.66234	1	3.12834	0.00228293	0.0350399	++	ADTRP|ALG3|B4GALT1|BCL2|C5ORF45|CNBP|COL9A3|CTR9|EBNA1BP2|EIF4G1|ERP29|FNBP1L|GCDH|GNL3|HSP90B1|IDH3A|IQGAP2|ITGAE|IVNS1ABP|KIAA0226L|LPCAT4|LSG1|MANF|MAT2A|MTHFD1|NOSIP|OAS1|OXSR1|PARL|PCK2|PEBP1|PNP|PPIB|RAP1GDS1|SFTPB|SLC43A3|ST3GAL5|TFRC|TYMS|UBE2E3|WDFY1|EXCLUDED_GENES:|FOXP1
BOYLAN_MULTIPLE_MYELOMA_C_D_UP	MSigDB_C2	8	138	2.31065	1.50145	5.7971	1	3.78922	0.00229825	0.0352313	+*/*+	AFF3|CHML|FAM129C|MTHFD1|NOLC1|NT5DC2|PDLIM1|TFRC
MODULE_358	MSigDB_C4	6	81	1.35499	1.1513	7.40741	1	4.03459	0.00238399	0.0363654	+*	AEN|CD69|LBH|NFKBID|NOC3L|TLE4
Human Viral_Cairo08_88genes (19061838-TableS16)	GeneSigDB	6	81	1.35473	1.15201	7.40741	1	4.03232	0.00238399	0.0363654	+*	CSDA|MAT2A|MINA|MTHFD1|TFRC|TYMS|EXCLUDED_GENES:|CCND2
MODULE_165	MSigDB_C4	6	81	1.35599	1.15296	7.40741	1	4.02789	0.00238399	0.0363654	+*	DBN1|HCK|LILRA2|LYN|MNDA|RAC2
GTGCAAT,MIR-25,MIR-32,MIR-92,MIR-363,MIR-367	MSigDB_C3	13	311	5.20062	2.24944	4.18006	1	3.46725	0.00238963	0.0364066	++	BMPR2|C5ORF30|CD69|CREB3L2|HIVEP1|IQGAP2|S1PR1|SLC38A2|TBL1XR1|TGIF1|TMEM184B|TRAM2|UBE2W
PID_IL2_PI3KPATHWAY	MSigDB_C2	4	34	0.567678	0.747042	11.7647	1	4.59455	0.00240506	0.036462	+*	BCL2|GAB2|IL2RA|UGCG
PID_IL8CXCR2_PATHWAY	MSigDB_C2	4	34	0.569484	0.747275	11.7647	1	4.5907	0.00240506	0.036462	+*	HCK|LYN|PRKCB|RAC2
GNF2_BNIP2	MSigDB_C4	4	34	0.569818	0.748086	11.7647	1	4.58528	0.00240506	0.036462	+*	ADPGK|GMFG|MTDH|PAK2
V$HNF3ALPHA_Q6	MSigDB_C3	10	204	3.41313	1.82403	4.90196	1	3.61116	0.00239644	0.036462	++	ADTRP|AFF3|CHD2|GPM6A|PDCD4|SMARCA2|SPIB|TET2|TLE1|ZADH2|EXCLUDED_GENES:|FOXP1
LY_AGING_OLD_DN	MSigDB_C2	5	56	0.93685	0.959378	8.92857	1	4.23519	0.00242306	0.0365802	*+/+*	KIF14|MCM2|TGFBR2|TYMS|UGCG
GNF2_PECAM1	MSigDB_C4	5	56	0.937849	0.960183	8.92857	1	4.2306	0.00242306	0.0365802	+*	HCK|LILRA2|LILRA6|LILRB2|PLBD1
AKT_UP.V1_UP	MSigDB_C6	9	171	2.86123	1.67127	5.26316	1	3.67313	0.00242424	0.0365802	+*/*+	BPGM|GPD2|HCK|P2RX5|PAK1|PLAGL1|PTPRJ|TESC|TFRC
Human InVitro_Bild06_298genes (16273092-TableS1b)	GeneSigDB	11	239	3.99705	1.97335	4.60251	1	3.54876	0.00242764	0.0365802	+*	C5ORF30|CHML|CHST2|CHST7|IL17RB|NETO2|PKN3|PLCL2|RAVER2|TSHZ1|ZNF275|EXCLUDED_GENES:|ENTPD1
JOHNSTONE_PARVB_TARGETS_3_UP	MSigDB_C2	16	427	7.1401	2.62782	3.74707	1	3.37158	0.00242674	0.0365802	++/++	ARNT2|BCL3|DUSP5|EHD1|EIF4G1|FAM108C1|LITAF|MARCKS|PAK2|PDCD4|PION|SIK3|TGFBR2|TGIF1|TOX2|UGCG|EXCLUDED_GENES:|FUT8|SH3BP5
BENPORATH_NANOG_TARGETS	MSigDB_C2	29	984	16.463	3.94732	2.94715	1	3.17608	0.00243241	0.0366075	++	AKIRIN1|ANP32A|AP3B1|CABLES1|CDYL|CELF2|CHD2|CNBP|CSNK1E|CYB5B|ELL2|EPM2AIP1|EPS15L1|FAM100B|GNPTAB|IDH3A|LEPROTL1|METTL8|NOC3L|NOLC1|PIM2|PNP|POLR3G|PTPN2|STAT3|TBL1XR1|UBE2W|VOPP1|WDR6|EXCLUDED_GENES:|ENTPD1|PTPN1
Human Leukemia_McWeeney10_885genes (19837975-TableS1)	GeneSigDB	20	591	9.8796	3.07906	3.38409	1	3.28685	0.00246423	0.0370413	++	CHD2|CYB5B|DOCK10|ELOVL7|GAB1|HIST1H1C|HIST1H2AC|HK2|IL10RA|MARCKS|MAT2A|NABP1|NFKBIZ|PDCD4|PHTF1|PLBD1|PLCL2|STAMBPL1|TCF4|TNFAIP8|EXCLUDED_GENES:|PIM1
chr18q21	MSigDB_C1	6	82	1.37081	1.15899	7.31707	1	3.99416	0.00253666	0.0378541	+*	BCL2|C18ORF25|FECH|LMAN1|MEX3C|TCF4
Human Lypmhoma_Leval07_96genes (17284527-Table2)	GeneSigDB	6	82	1.37202	1.15922	7.31707	1	3.99232	0.00253666	0.0378541	++	CCL22|CD200|IGHM|IGSF3|PIM2|SPIB
Resting_blood_B_cell_GNF	SignatureDB	6	82	1.37163	1.15978	7.31707	1	3.99074	0.00253666	0.0378541	++	CD200|CD37|METTL8|P2RX5|P2RY10|PDLIM1
LENAOUR_DENDRITIC_CELL_MATURATION_UP	MSigDB_C2	7	110	1.84169	1.34302	6.36364	1	3.84083	0.00253162	0.0378541	++/*+	CCL22|CCR7|DUSP5|PEBP1|RNASE6|SLA|TFRC|EXCLUDED_GENES:|CCND2|IRF4
MODULE_145	MSigDB_C4	7	110	1.84047	1.34336	6.36364	1	3.84076	0.00253162	0.0378541	+*	BCL2|CD200|FAIM3|IGHM|KCNA3|KIAA0226L|SLC27A5|EXCLUDED_GENES:|FOXP1
Mouse Lymphoma_Wu08_1148genes (18535662-TableS2c)	GeneSigDB	19	551	9.2134	2.97703	3.44828	1	3.28737	0.00254797	0.0379771	++	AKIRIN1|ANKRD12|AP3B1|ATP1B3|B4GALT1|CHST2|LYN|MARCKS|NETO2|PLAGL1|PPIB|PTPLA|RAB7L1|RILPL2|S1PR1|SLC43A3|TCF4|TGIF1|UBA5|EXCLUDED_GENES:|CCND2|PIM1|SH3BP5
FOURNIER_ACINAR_DEVELOPMENT_LATE_2	MSigDB_C2	12	277	4.63382	2.1217	4.33213	1	3.47182	0.00259269	0.0385692	++	EHD1|FASTKD1|HSP90B1|MANF|MCM2|MRPL3|MTHFD1|NOLC1|NT5DC2|RAP1GDS1|RNF138|UCK2
MODULE_459	MSigDB_C4	16	430	7.18871	2.63787	3.72093	1	3.3403	0.00260017	0.0385692	++	C6ORF106|CELF2|CHD1|COCH|EPS15L1|FAM108C1|LEPROTL1|MOCOS|PLEKHG1|PTPLA|RNASE6|SLAMF7|STAMBPL1|STAT3|UGCG|ZNF107
FEVR_CTNNB1_TARGETS_DN	MSigDB_C2	19	552	9.23388	2.9822	3.44203	1	3.27481	0.00259925	0.0385692	++/+*	AP3B1|CARD11|CD44|DCAF17|DCTD|GCDH|GRWD1|LIMD1|MCM2|METTL13|MRPL3|MTHFD1|NOLC1|PECR|RNF138|SMC6|TYMS|U2SURP|UBE2E3|EXCLUDED_GENES:|CCND2
CTTTGA_V$LEF1_Q2	MSigDB_C3	34	1219	20.3879	4.36338	2.78917	1	3.11961	0.0026	0.0385692	++	AFF3|BMPR2|C18ORF25|C6ORF106|CCR7|CDYL|CHD2|CHN2|CKAP4|CLINT1|CREB3L2|EIF4G1|EML4|FAM100B|FKBP11|GAB2|GPM6A|IL10RA|PCK2|PHTF1|PIM2|PRKCB|RAB30|SLC38A5|SLC43A3|SMARCA2|SNX18|TBL1XR1|TCF4|TGIF1|TLE1|TLE4|XK|ZBTB32|EXCLUDED_GENES:|FUT8|PIM1
MATTHEWS_AP1_TARGETS	MSigDB_C2	3	17	0.284486	0.52863	17.6471	1	5.13689	0.00265297	0.0390789	+*	BCL3|CD44|LBH
NFkB_Up_OCILy10_only	SignatureDB	3	17	0.28492	0.528962	17.6471	1	5.13284	0.00265297	0.0390789	+*	CFLAR|IL10|LYN|EXCLUDED_GENES:|CCND2
BIOCARTA_IL10_PATHWAY	MSigDB_C2	3	17	0.284788	0.529409	17.6471	1	5.12876	0.00265297	0.0390789	+*	IL10|IL10RA|STAT3
NFkB_Up_K1106	SignatureDB	3	17	0.285137	0.529519	17.6471	1	5.12704	0.00265297	0.0390789	+*	CCL22|CD44|MIR155HG
REACTOME_SIGNALING_BY_RHO_GTPASES	MSigDB_C2	7	111	1.85812	1.34843	6.30631	1	3.81323	0.00266405	0.0390789	+*	ARHGAP17|ARHGAP24|ARHGEF3|CHN2|FGD2|RAC2|RASGRF1
Human Leukemia_Zheng06_114genes (16617318-SuppTable2)	GeneSigDB	7	111	1.85982	1.34822	6.30631	1	3.81258	0.00266405	0.0390789	+*	C9ORF91|CD200|CDYL|FAM46C|KCTD5|LBH|LEPROTL1
Human Leukemia_Takeda06_309genes (16818636-TableS2)	GeneSigDB	10	207	3.45955	1.83602	4.83092	1	3.5623	0.00266307	0.0390789	++	ACSM3|ARHGEF3|CCL18|CD69|HIST1H2AC|IGHM|OAS1|RNASE6|SOGA2|SP110|EXCLUDED_GENES:|ENTPD1|FOXP1
V$SP1_Q2_01	MSigDB_C3	11	242	4.04664	1.98662	4.54545	1	3.50009	0.00267244	0.0390789	+*	ANKRD12|ANP32A|BCL3|CACNA1D|CTR9|DNMT3A|PAK1|PTPN2|PTPRJ|RAP1GDS1|SNX18|EXCLUDED_GENES:|FUT8|SH3BP5
CHICAS_RB1_TARGETS_GROWING	MSigDB_C2	11	242	4.05065	1.98641	4.54545	1	3.49845	0.00267244	0.0390789	++	ADAMTS6|DOCK10|KIF14|MARCKS|MCM2|PCK2|RNF138|SMARCC1|TBL1XR1|TNFAIP8|TRAM2
BILD_E2F3_ONCOGENIC_SIGNATURE	MSigDB_C2	11	242	4.05086	1.98739	4.54545	1	3.49661	0.00267244	0.0390789	+*	C5ORF30|CHML|CHST2|CHST7|IL17RB|NETO2|PKN3|PLCL2|RAVER2|TSHZ1|ZNF275
V$CEBPA_01	MSigDB_C3	11	242	4.05037	1.98802	4.54545	1	3.49575	0.00267244	0.0390789	+*	ADRB2|CHML|CHST7|CLINT1|CSNK1E|RAB30|S1PR1|SMARCA2|SPIB|XK|ZADH2
V$USF_C	MSigDB_C3	12	278	4.64772	2.1246	4.31655	1	3.46055	0.00266992	0.0390789	+*	AEN|CACNA1D|DNMT3A|EIF4G1|FKBP11|GYG1|IPO4|IVNS1ABP|LPCAT4|MAT2A|MTHFD1|PLBD1
GNF2_CD14	MSigDB_C4	4	35	0.584507	0.756666	11.4286	1	4.51387	0.00268	0.039097	+*	HCK|LILRA3|LILRB2|PLBD1
RODRIGUES_NTN1_AND_DCC_TARGETS	MSigDB_C2	4	35	0.585292	0.759243	11.4286	1	4.49752	0.00268	0.039097	+*	ARHGEF3|BCL3|KIF13B|NFKBIZ
Human EmbryonicStemCell_Xu09_1801genes (19658189-TableS4)	GeneSigDB	39	1458	24.3819	4.75577	2.6749	1	3.07375	0.00268353	0.0391025	++	ACPP|ACSM3|ARID3B|ASPHD2|CARD11|CCDC50|CCL18|CD200|CD44|COCH|COL9A3|CYB5R2|DNMT3A|EPHB1|FKBP11|FNBP1L|GAB2|GNPTAB|LAG3|LITAF|LRRC33|MCOLN2|NT5DC2|OAS1|PAK1|PCK2|PHACTR1|PIM2|PTPN2|RNASE6|SH2D3C|SLC38A5|SLC43A3|SMARCC1|SP110|TLE1|TUBB4A|UMPS|ZNF101|EXCLUDED_GENES:|BLNK|BMF|ENTPD1|FUT8
Human Viral_Mimori08_6genes (19120899-Table2b)	GeneSigDB	2	5	0.083853	0.287068	40	1	6.6749	0.00269894	0.0391885	+*	BCL2|CASP10
IL6_Ly10_Up_group3	SignatureDB	2	5	0.084174	0.288067	40	1	6.65062	0.00269894	0.0391885	+*	BCL3|GPR183
LIEN_BREAST_CARCINOMA_METAPLASTIC_VS_DUCTAL_UP	MSigDB_C2	6	83	1.39106	1.16658	7.22892	1	3.95082	0.00269655	0.0391885	+*/**	COL9A3|CSDA|KIF14|LEPREL1|NT5DC2|PLAGL1
MORF_HAT1	MSigDB_C4	9	174	2.909	1.68263	5.17241	1	3.61992	0.0027247	0.0395162	+*	CNBP|EIF4G1|MRPL3|MTDH|MTHFD1|NDUFV2|RNF126|TARS|TOMM70A
DANG_MYC_TARGETS_UP	MSigDB_C2	8	142	2.37421	1.52409	5.6338	1	3.69124	0.00274374	0.0397457	+*/**	CSDA|GNL3|MAT2A|MINA|MIR155HG|MTHFD1|TFRC|TYMS|EXCLUDED_GENES:|CCND2
TTTGCAC,MIR-19A,MIR-19B	MSigDB_C3	18	514	8.60098	2.87153	3.50195	1	3.27318	0.00278003	0.0402242	++	ANKRD12|BCL3|BMPR2|C5ORF30|CD69|DBN1|ELL2|FAM46C|FNDC3A|IGSF3|IVNS1ABP|LBH|S1PR1|SMARCA2|ST3GAL5|TGFBR2|TGIF1|ZMYND11|EXCLUDED_GENES:|CCND2|FOXP1
LUCAS_HNF4A_TARGETS_UP	MSigDB_C2	5	58	0.969174	0.974681	8.62069	1	4.13553	0.00282871	0.0408331	+*/**	ATXN7L1|C16ORF5|CFLAR|KIF13B|MAN1A1
JI_RESPONSE_TO_FSH_DN	MSigDB_C2	5	58	0.970179	0.975294	8.62069	1	4.1319	0.00282871	0.0408331	*+/++	CYB5B|HK2|MAT2A|PAK2|ZMYND11
MODULE_378	MSigDB_C4	16	434	7.26006	2.64727	3.68664	1	3.30149	0.00284733	0.0410539	++	C6ORF106|CELF2|CHD1|COCH|EPS15L1|FAM108C1|LEPROTL1|MOCOS|PLEKHG1|PTPLA|RNASE6|SLAMF7|STAMBPL1|STAT3|UGCG|ZNF107
Human Leukemia_Ge06_106genes (16249385-Table3)	GeneSigDB	6	84	1.40534	1.17398	7.14286	1	3.91374	0.00286388	0.0412446	+*	IGSF3|PHTF1|SOGA2|STAM|TFRC|XK
GRAESSMANN_APOPTOSIS_BY_DOXORUBICIN_UP	MSigDB_C2	32	1134	18.9646	4.22338	2.82187	1	3.08649	0.00289252	0.0416086	++/++	ADAM8|ADRB2|AEN|ARMC7|CCDC86|CTR9|EHD1|ELOVL7|EPM2AIP1|FA2H|FAM100B|GCDH|IER5|LITAF|MAPKAPK2|MSRB1|NABP1|NT5DC2|PDLIM1|PLK3|PNP|RRP9|SEC61A1|SH2D3C|SLC19A2|SLC33A1|SP100|SP110|ST6GALNAC4|THYN1|TMEM184B|TRAFD1|EXCLUDED_GENES:|PTPN1
Mouse StemCell_Ramos06_1482genes (17009876-tableS1a)	GeneSigDB	31	1088	18.1939	4.13165	2.84926	1	3.09951	0.00290313	0.0417127	++	ATXN7L1|BCL2L10|CCDC50|CCL22|CD44|CSDA|CSNK1E|ELL2|ERP29|GAB1|GMFG|IDH3A|IVNS1ABP|LPIN2|MAPKAPK2|MAT2A|MPEG1|PAK2|PCK2|PCYT1A|PDCD4|PLK3|SCAMP2|SLC27A5|SLC38A2|STAT3|TRAFD1|TYMS|UBE2E3|UCK2|UMPS|EXCLUDED_GENES:|PIM1
V$ICSBP_Q6	MSigDB_C3	11	245	4.10023	1.99539	4.4898	1	3.45787	0.0029368	0.0421474	++	ADAM8|CABLES1|CYB5B|FNBP1L|HIST1H1C|HIVEP1|SIK3|SP110|SP140|TGIF1|TOR1AIP1|EXCLUDED_GENES:|ENTPD1|FUT8
Human Leukemia_Frank06_128genes (16728981-SuppTable2)	GeneSigDB	7	113	1.88958	1.35961	6.19469	1	3.75873	0.00294483	0.0422137	+*	ACSM3|C16ORF88|COCH|IDH3A|IGSF3|LPCAT4|NEK3
Notch_T-ALL_Sharma_UP	SignatureDB	4	36	0.602309	0.769111	11.1111	1	4.41769	0.00297572	0.0426072	+*/+*	GNL3|GRWD1|HK2|IL2RA
NEGATIVE_REGULATION_OF_CELLULAR_PROCESS	MSigDB_C5	21	644	10.7711	3.21667	3.26087	1	3.17997	0.0030036	0.0429567	+*	ADRB2|AVEN|BCL2|BCL2L10|BCL3|CFLAR|CSDA|ERN1|FAIM3|GCLC|GLO1|HSP90B1|IL10|PDCD4|PLAGL1|STAT3|TGIF1|TLE1|TNFAIP8|ZBTB32|ZMYND11|EXCLUDED_GENES:|PIM1
BONOME_OVARIAN_CANCER_SURVIVAL_OPTIMAL_DEBULKING	MSigDB_C2	11	246	4.11605	2.00097	4.47154	1	3.44031	0.00302945	0.0432764	++	ARHGAP24|IQGAP2|PCK2|PHACTR2|PLAGL1|SACS|SEC61B|SLC19A2|SP100|TM2D3|TUBB4A
MORI_SMALL_PRE_BII_LYMPHOCYTE_UP	MSigDB_C2	6	85	1.42284	1.18032	7.05882	1	3.8779	0.00303886	0.0433607	+*/++	AKIRIN1|B4GALT1|ERP29|IL12A|MARCKS|PIM2|EXCLUDED_GENES:|IRF4
BHAT_ESR1_TARGETS_NOT_VIA_AKT1_UP	MSigDB_C2	10	211	3.52772	1.85367	4.73934	1	3.49161	0.00305496	0.0435402	++/+*	B4GALT1|FAIM3|FAM46C|GAB2|HCK|HK2|HPDL|MAT2A|NOLC1|PMM2
TGGTGCT,MIR-29A,MIR-29B,MIR-29C	MSigDB_C3	18	519	8.6845	2.89204	3.46821	1	3.22108	0.00307812	0.0438198	++	ABCE1|ADAMTS6|CSDA|DNMT3A|EML4|GAB1|GPX7|KCTD5|MAT2A|RAB30|RAP1GDS1|RNF138|SIDT1|SMARCC1|TRAFD1|VASH2|WDFY1|ZNF385C|EXCLUDED_GENES:|BMF|CCND2
Human Intestine_Vozenin-Brotons04_119genes (14982484-Table3)	GeneSigDB	7	114	1.90643	1.36611	6.14035	1	3.72851	0.00309344	0.0439368	++	CASP10|CNBP|CSDA|EPHB1|IL2RA|RASGRF1|SUB1
Mouse Immune_Carmody02_151genes (12446012-Table2)	GeneSigDB	7	114	1.90828	1.36657	6.14035	1	3.72592	0.00309344	0.0439368	+*	ADAM8|CD44|HCK|HK2|LILRA6|PNP|SLA|EXCLUDED_GENES:|PTPN1
AAGCACA,MIR-218	MSigDB_C3	15	398	6.66151	2.54065	3.76884	1	3.28202	0.00310094	0.0439928	++	AKIRIN1|DBN1|DUSP5|GAB2|GPM6A|HIVEP1|IKZF1|KCNA3|MARCKS|OXSR1|PHF16|SACS|SEC61A1|VOPP1|ZBTB11
NIELSEN_MALIGNAT_FIBROUS_HISTIOCYTOMA_DN	MSigDB_C2	3	18	0.301195	0.543282	16.6667	1	4.9676	0.00314438	0.0442538	**/+*	BCL2|SUB1|TSHZ1
Mouse Viral_Pekova09_25genes (19181379-Table2)	GeneSigDB	3	18	0.301016	0.54352	16.6667	1	4.96575	0.00314438	0.0442538	+*	HIST1H1C|HIST1H2AC|HIST1H2BB
Human Lymphoma_Murakami02_22genes (11298554-Table1)	GeneSigDB	3	18	0.301822	0.544176	16.6667	1	4.95828	0.00314438	0.0442538	+*	CCL22|CCR7|CFLAR|EXCLUDED_GENES:|IL16
BCL6_repressed	SignatureDB	3	18	0.301133	0.544357	16.6667	1	4.9579	0.00314438	0.0442538	+*	CD44|CD69|GPR183|EXCLUDED_GENES:|CCND2
Tcell_PIind4x_CsAindependent	SignatureDB	3	18	0.301379	0.544404	16.6667	1	4.95702	0.00314438	0.0442538	++	DUSP5|GPR183|IL2RA
Human Uterine_Wong05_18genes (16353136-Table2)	GeneSigDB	3	18	0.301693	0.544548	16.6667	1	4.95513	0.00314438	0.0442538	+*	MCM2|TFRC|TYMS
FORTSCHEGGER_PHF8_TARGETS_DN	MSigDB_C2	24	777	12.9918	3.51648	3.0888	1	3.13046	0.00313902	0.0442538	+*/++	ARID3B|ARNT2|C6ORF106|CD47|CYB5R2|DCTD|EHD1|ELL2|ELOVL7|ERCC6L2|FKBP11|IDH3A|MTDH|PHTF1|RAC2|RAP1GDS1|SOGA2|STAMBPL1|TBL1XR1|TCEB3|TMEM184B|TRAM2|ULK2|ZMYND11|EXCLUDED_GENES:|FUT8
ATACCTC,MIR-202	MSigDB_C3	9	178	2.97438	1.70511	5.05618	1	3.53386	0.00317035	0.044512	++	ARID3B|CHN2|HK2|IL10|LBH|LEPROTL1|LIMD1|PNP|UBE2W|EXCLUDED_GENES:|CCND2
BROWNE_HCMV_INFECTION_48HR_UP	MSigDB_C2	9	178	2.9777	1.7073	5.05618	1	3.52739	0.00317035	0.044512	+*/*+	CASP10|COL9A3|FNBP1L|GAB1|GPD2|MNDA|RAB7L1|TLE1|ZNF101
Human Brain_Beier07_383genes (17483311-SuppTable1)	GeneSigDB	12	284	4.74853	2.14754	4.22535	1	3.37665	0.00317352	0.044512	+*	ARHGAP24|CCDC50|CDKL1|CFLAR|COL9A3|FZD6|IRF2BP2|MINA|NFKBIZ|RAB30|ST6GALNAC4|TLE1
MODULE_317	MSigDB_C4	16	439	7.34369	2.66167	3.64465	1	3.25221	0.00318335	0.0445993	++	C6ORF106|CELF2|CHD1|COCH|EPS15L1|FAM108C1|LEPROTL1|MOCOS|PLEKHG1|PTPLA|RNASE6|SLAMF7|STAMBPL1|STAT3|UGCG|ZNF107
FERRANDO_T_ALL_WITH_MLL_ENL_FUSION_UP	MSigDB_C2	6	86	1.4387	1.18813	6.97674	1	3.83906	0.0032217	0.0449838	+*/**	CD47|CSDA|IKZF1|STAT3|TCF4|TLE4
NELSON_RESPONSE_TO_ANDROGEN_UP	MSigDB_C2	6	86	1.43949	1.18812	6.97674	1	3.83844	0.0032217	0.0449838	+*/**	B4GALT1|ELL2|IQGAP2|LMAN1|SLC38A2|TNFAIP8
Human StemCell_Davicioni06_389genes (16849537-SuppTable3)	GeneSigDB	13	322	5.38934	2.28717	4.03727	1	3.32754	0.00321739	0.0449838	++	CD44|CSNK1E|CTR9|KIAA0226L|LEPREL1|MAP3K5|MARCH3|MARCKS|PHACTR2|ST3GAL5|TCF4|TGIF1|TRAM2|EXCLUDED_GENES:|CCND2|SH3BP5
ATCATGA,MIR-433	MSigDB_C3	7	115	1.92286	1.36986	6.08696	1	3.70632	0.00324771	0.0452449	+*	ANKRD12|AP3B1|CLINT1|GCLC|HIVEP1|PARL|SLA
Human Colon_Fritzmann09_123genes (19328798-SuppTable2)	GeneSigDB	7	115	1.9224	1.37295	6.08696	1	3.69831	0.00324771	0.0452449	+*	CD47|CYB5B|ERP29|HSP90B1|SUB1|TARS|UBE2E3
LANDIS_ERBB2_BREAST_TUMORS_65_DN	MSigDB_C2	4	37	0.617605	0.778849	10.8108	1	4.34281	0.00329298	0.0453142	**/++	ATP1B3|GPD2|GYG1|MARCKS
GENTILE_UV_RESPONSE_CLUSTER_D6	MSigDB_C2	4	37	0.617992	0.778932	10.8108	1	4.34185	0.00329298	0.0453142	+*	C5ORF30|TGFBR2|TLE4|UGCG
ST_GA13_PATHWAY	MSigDB_C2	4	37	0.620906	0.779386	10.8108	1	4.33559	0.00329298	0.0453142	+*	BCL2|MAP3K5|NFKBIB|RDX
Mouse Lung_not_cancer_Cavarra09_43genes (19118092-Table4)	GeneSigDB	4	37	0.618447	0.780142	10.8108	1	4.33454	0.00329298	0.0453142	+*	CD44|CSNK1E|KCNA3|TFRC
IL6_Ly10_Up_all	SignatureDB	4	37	0.619311	0.780688	10.8108	1	4.3304	0.00329298	0.0453142	+*	BATF|BCL3|GPR183|IL10|EXCLUDED_GENES:|IRF4|PTPN1
CUI_GLUCOSE_DEPRIVATION	MSigDB_C2	5	60	1.00364	0.991887	8.33333	1	4.02905	0.00328131	0.0453142	+*	PCK2|PPIB|SLC33A1|TFRC|TGIF1
OUILLETTE_CLL_13Q14_DELETION_DN	MSigDB_C2	5	60	1.00452	0.991881	8.33333	1	4.02818	0.00328131	0.0453142	**/+*	ADAMTS6|BSPRY|DLEU1|KLHL21|ULK2
SONG_TARGETS_OF_IE86_CMV_PROTEIN	MSigDB_C2	5	60	1.0021	0.992908	8.33333	1	4.02645	0.00328131	0.0453142	+*	DLEU1|MCM2|PNP|TYMS|UMPS
HIF1alpha_1.5x_DN	SignatureDB	10	213	3.562	1.86347	4.69484	1	3.45484	0.00326744	0.0453142	*+/+*	EBNA1BP2|GRWD1|IDH3A|IPO4|MCM2|MTHFD1|NOLC1|POLR3G|RRP9|UMPS
Human Ovarian_Wood03_445genes (12734205-TableS2)	GeneSigDB	14	361	6.03544	2.41899	3.87812	1	3.29251	0.00326582	0.0453142	++	B4GALT1|CD200|CD44|CHST7|HK2|IPO4|LEPROTL1|NDUFV2|PDCD4|PMM2|PTPRJ|TCEB3|TFRC|TSHZ1
Mouse StemCell_Ulloa-Montoya07_775genes (17683608-TableS4)	GeneSigDB	21	649	10.8524	3.22579	3.23575	1	3.14577	0.00328403	0.0453142	++	ARHGAP17|ATP13A3|CHN2|CKAP4|COPB2|CREB3L2|ERP29|FNDC3A|GMPPB|LEPREL1|LPCAT4|MANF|MAP3K5|METTL13|PARP4|RAB30|RNASE6|SEC13|SLC43A3|SRPRB|TOR1AIP1|EXCLUDED_GENES:|ETV6|FUT8
V$NFKAPPAB_01	MSigDB_C3	11	249	4.16411	2.01127	4.41767	1	3.39879	0.00332161	0.0456068	++	BCL3|CXORF21|ERN1|HIVEP1|IER5|IL2RA|NFKBIB|NFKBID|P2RY10|SMC6|ZBTB11|EXCLUDED_GENES:|BMF|ETV6
Human Lung_Kobayashi06_320genes (17145885-SuppTable2)	GeneSigDB	11	249	4.16404	2.01374	4.41767	1	3.39465	0.00332161	0.0456068	+*	ABCE1|DUSP5|ELL2|KIF14|MCM2|NETO2|NOC3L|NOLC1|SLC43A3|TYMS|UCK2
MIKKELSEN_NPC_ICP_WITH_H3K4ME3	MSigDB_C2	16	441	7.37699	2.66767	3.62812	1	3.23241	0.00332663	0.045625	++	ADAMTS6|ALG3|ATXN7L1|BPGM|CD44|CNTNAP1|CYB5R2|FASTKD1|FTSJ1|GCDH|GPM6A|GPR183|KIF14|LSG1|NOSIP|PDE4B|EXCLUDED_GENES:|ENTPD1
CREIGHTON_ENDOCRINE_THERAPY_RESISTANCE_1	MSigDB_C2	18	523	8.74526	2.90113	3.44168	1	3.19005	0.00333535	0.0456939	++	AFF3|ARHGAP24|BATF|BBIP1|BCL2|EPS15L1|GTF3A|MAPKAPK2|MEX3C|MTHFD1|PCK2|PDCD4|PTPLA|RAB7L1|SLC38A2|TET2|THYN1|UBA5|EXCLUDED_GENES:|FUT8|SH3BP5
Human Colon_Jorissen08_829genes (19088021-supptable2)	GeneSigDB	22	694	11.603	3.32873	3.17003	1	3.12342	0.00338688	0.0463486	++	ASPHD2|C18ORF25|CD200|CHN2|ECI1|ELOVL7|EPM2AIP1|ITGAE|KIAA0226L|NT5DC2|PDCD4|PHACTR2|PKN3|PLAGL1|PPIB|RNF138|SCAMP2|SMARCC1|SRPRB|TGFBR2|TYMS|WDFY1|EXCLUDED_GENES:|FUT8
PODAR_RESPONSE_TO_ADAPHOSTIN_UP	MSigDB_C2	8	147	2.45987	1.54973	5.44218	1	3.57491	0.00339232	0.0463717	++/+*	CD44|DUSP5|FNDC3A|GAB2|HIST1H2BB|IER5|KLHL21|SLC38A2
HAHTOLA_MYCOSIS_FUNGOIDES_CD4_DN	MSigDB_C2	7	116	1.94057	1.37666	6.03448	1	3.67515	0.00340779	0.0464805	**/++	ABCE1|CD69|LEPROTL1|MRPL3|PEBP1|SMARCA2|UGCG
Human Leukemia_Mollinedo08_117genes (18547747-Table1)	GeneSigDB	7	116	1.94125	1.37808	6.03448	1	3.67086	0.00340779	0.0464805	+*	ADAM8|IL10RA|MCM2|MRPL3|POLR1C|TGFBR2|UMPS
CCAWWNAAGG_V$SRF_Q4	MSigDB_C3	6	87	1.45558	1.19514	6.89655	1	3.80243	0.00341261	0.046495	+*	DUSP5|EPHB1|MAPKAPK2|RAB30|SUSD1|TCF4
FARMER_BREAST_CANCER_APOCRINE_VS_LUMINAL	MSigDB_C2	13	325	5.43356	2.29734	4	1	3.29357	0.00347968	0.047337	++	ARNT2|BCL2|C5ORF30|CHN2|COL9A3|MAP3K5|MARCH3|MINA|PDLIM1|PNP|TLE1|U2SURP|ULK2|EXCLUDED_GENES:|BLNK
Myc_ChIP_PET_Expr_UP	SignatureDB	15	403	6.73729	2.55531	3.72208	1	3.23354	0.00348207	0.047337	+*/++	CDK12|COCH|CSDA|FKBP11|GTF3A|METTL8|MINA|NOLC1|PARL|POLR3G|RAP1GDS1|SELRC1|SRPRB|TOMM70A|ZNF614
SANSOM_APC_MYC_TARGETS	MSigDB_C2	10	215	3.59488	1.87368	4.65116	1	3.41847	0.00349152	0.0473849	+*	ACPP|C16ORF88|CARD11|KPTN|MTHFD1|PKN3|PLK3|RRP9|SEC61A1|TFRC|EXCLUDED_GENES:|FUT8
Mouse Skin_Driskell09_1477genes (19605494-TableS2)	GeneSigDB	26	873	14.5988	3.72093	2.97824	1	3.06408	0.00349326	0.0473849	++	AFF3|ANXA11|ARNT2|BPGM|CCDC50|CHD1|CHN2|DCTD|FA2H|FTSJ1|FZD6|GABPB1|GMPPB|GPD2|LRRC33|MCM2|MTHFD1|PLCL2|PTPRJ|STAT3|TBL1XR1|TCF4|TET2|TLE4|TRAM2|TYMS|EXCLUDED_GENES:|CCND2|ENTPD1
TTGCWCAAY_V$CEBPB_02	MSigDB_C3	5	61	1.0201	1.00014	8.19672	1	3.97933	0.00352614	0.0477081	+*	B4GALT1|CKAP4|PHF16|SIK3|SPIB|EXCLUDED_GENES:|BMF|ETV6
KORKOLA_YOLK_SAC_TUMOR	MSigDB_C2	5	61	1.01992	1.00034	8.19672	1	3.97872	0.00352614	0.0477081	+*	COCH|EHHADH|LEPREL1|PTPLA|SMARCA2
KOBAYASHI_EGFR_SIGNALING_24HR_DN	MSigDB_C2	11	251	4.1963	2.02074	4.38247	1	3.36694	0.00352865	0.0477081	**/+*	ABCE1|DUSP5|ELL2|KIF14|MCM2|NETO2|NOC3L|NOLC1|SLC43A3|TYMS|UCK2
STK33_UP	MSigDB_C6	12	288	4.8185	2.16133	4.16667	1	3.32273	0.00355005	0.0479451	++/++	ACSM3|ANKRD12|BCL3|DUSP5|FNBP1L|FNDC3A|HIST1H2AC|IL10RA|MPEG1|TGIF1|UBE2W|ZMYND11|EXCLUDED_GENES:|BMF
BHAT_ESR1_TARGETS_NOT_VIA_AKT1_DN	MSigDB_C2	6	88	1.47046	1.201	6.81818	1	3.77149	0.00361182	0.048673	++/+*	ARMC7|CREB3L2|IGSF3|MAP3K5|TLE1|TRAM2
Human Lung_Chitale09_105genes (19525976-SuppTable5c)	GeneSigDB	6	88	1.47259	1.20142	6.81818	1	3.76838	0.00361182	0.048673	+*	C1ORF186|CCDC86|CELF2|FTSJ1|GPD2|MCM2|EXCLUDED_GENES:|CCND2
BOYLAN_MULTIPLE_MYELOMA_C_CLUSTER_UP	MSigDB_C2	4	38	0.6353	0.789522	10.5263	1	4.26169	0.0036325	0.0487394	+*/*+	FAM129C|GABPB1|SLC43A3|TYMS
PID_RAC1_REG_PATHWAY	MSigDB_C2	4	38	0.635498	0.789851	10.5263	1	4.25967	0.0036325	0.0487394	+*	ARHGAP17|CHN2|RAP1GDS1|RASGRF1
HOLLEMAN_VINCRISTINE_RESISTANCE_B_ALL_UP	MSigDB_C2	4	38	0.636334	0.790101	10.5263	1	4.25726	0.0036325	0.0487394	+*/+*	CREB3L2|KIAA0226L|LBH|TCEB3
CAGGTA_V$AREB6_01	MSigDB_C3	24	786	13.1484	3.54079	3.05344	1	3.06473	0.00362425	0.0487394	++	ADRB2|AICDA|ANP32A|ATXN7L1|CACNA1D|CD37|CHN2|EIF4G1|FNBP1L|GPM6A|HIST1H1C|HIST1H2BB|HIVEP1|KCTD5|MANF|MAP3K5|NOSIP|PDE4B|PLAGL1|PTPN2|S1PR1|TMEM184B|WDR6|ZADH2|EXCLUDED_GENES:|FOXP1
Human StemCell_Mishra08_289genes (18519693-Table1)	GeneSigDB	9	182	3.04025	1.72321	4.94505	1	3.4585	0.00367154	0.0491034	++	BCL2|BMPR2|CSNK1E|DUSP5|MCM2|PAK1|PAK2|PCK2|TBL1XR1|EXCLUDED_GENES:|CCND2
Resting_monocyte_GNF	SignatureDB	9	182	3.04448	1.72211	4.94505	1	3.45826	0.00367154	0.0491034	+*	CHST7|CKAP4|HCK|LILRA2|LILRA3|LILRB2|MNDA|MSRB1|PLBD1
CTACTGT,MIR-199A	MSigDB_C3	9	182	3.04373	1.72367	4.94505	1	3.45558	0.00367154	0.0491034	++	AKIRIN1|ARHGAP24|DNMT3A|EML4|FNBP1L|GPM6A|SMARCA2|SUB1|TGIF1|EXCLUDED_GENES:|FOXP1
Human Viral_Stoff-Khalili06_19genes (16410819-Table3)	GeneSigDB	3	19	0.318222	0.558884	15.7895	1	4.79845	0.00368802	0.0491114	+*	FAIM3|PLAGL1|TNFAIP8
TRANSCRIPTION_FROM_RNA_POLYMERASE_III_PROMOTER	MSigDB_C5	3	19	0.317744	0.55924	15.7895	1	4.79625	0.00368802	0.0491114	+*	GTF3A|IVNS1ABP|POLR3G
Human Prostate_Chambers09_196genes (19489030-SuppTable4)	GeneSigDB	8	149	2.4894	1.56023	5.36913	1	3.53191	0.00368272	0.0491114	++	ADRB2|CHML|GCLC|HIST1H1C|MARCKS|NFKBIZ|TFRC|TLK1
LANDIS_ERBB2_BREAST_TUMORS_324_UP	MSigDB_C2	8	149	2.49281	1.56004	5.36913	1	3.53017	0.00368272	0.0491114	++/++	C16ORF88|C19ORF10|ELL2|LITAF|LMAN1|PTPN2|ST3GAL5|ST6GALNAC4|EXCLUDED_GENES:|FUT8
V$CEBPB_02	MSigDB_C3	11	253	4.23143	2.02815	4.34783	1	3.33732	0.00374589	0.0498284	++	ADRB2|CHD2|CSNK1E|HIST1H1C|NFKBIZ|PHF16|SMARCA2|SPIB|STAT3|TGIF1|ZADH2|EXCLUDED_GENES:|BMF|CCND2|FOXP1
LINDGREN_BLADDER_CANCER_CLUSTER_3_UP	MSigDB_C2	13	328	5.48297	2.30624	3.96341	1	3.25943	0.00375909	0.0499503	+*/*+	COPB2|GLO1|HIST1H1C|IL17RB|IL2RA|KIF14|NETO2|PEBP1|PLAGL1|TARS|TFRC|TYMS|UCK2
BYSTRYKH_HEMATOPOIESIS_STEM_CELL_QTL_TRANS	MSigDB_C2	26	878	14.6824	3.73514	2.96128	1	3.03003	0.00376346	0.0499546	++	CHD1|CHST2|CNTNAP1|CSNK1E|DNMT3A|ECI1|GAB2|GABPB1|GLO1|GTF3A|GYG1|HIST1H1C|IGHM|MPEG1|NDUFV2|PCYT1A|PMM2|POLR1C|SLC38A2|STAT3|SUB1|TCF4|TFRC|TOMM70A|UBA5|UGCG
Thymic_DP_Tcell_gt_Thymic_progenitor_Tcell	SignatureDB	5	62	1.03481	1.00673	8.06452	1	3.93868	0.0037838	0.0501172	+*	CELF2|FAIM3|LBH|TOX2|VOPP1
PID_FCER1PATHWAY	MSigDB_C2	5	62	1.03764	1.00852	8.06452	1	3.92888	0.0037838	0.0501172	++	GAB2|LYN|PAK2|PRKCB|S1PR1
TGCACTT,MIR-519C,MIR-519B,MIR-519A	MSigDB_C3	16	447	7.47772	2.68533	3.57942	1	3.17365	0.00378874	0.0501288	++	ANKRD12|ARHGAP24|BMPR2|C18ORF25|CDK12|CELF2|FAM46C|FNBP1L|MAP3K5|NABP1|NETO2|PTPN2|SACS|SCAMP2|STAT3|TGFBR2|EXCLUDED_GENES:|SH3BP5
Human Leukemia_Mullighan07_566genes (17597811-SuppTable7)	GeneSigDB	17	488	8.16562	2.80801	3.48361	1	3.14613	0.0037936	0.0501316	++	ARID3B|C5ORF30|C7ORF23|CD200|CFLAR|CHST7|DUSP5|EHD1|MAP3K5|NIPA2|PDE4B|RRP9|SOGA2|TGFBR2|TLK1|TM2D3|VOPP1
Mouse StemCell_Fazzio08_2031genes (18614019-TableS4c)	GeneSigDB	34	1249	20.8876	4.41788	2.72218	1	2.96804	0.00379705	0.0501316	++	ADAM8|CARD11|CCDC86|CHST7|COCH|CTR9|DDI2|DNMT3A|DOCK10|EHHADH|ELL2|FAM46C|GRWD1|HIST1H1C|IER5|IGHM|MARCH3|NETO2|NOC3L|PHACTR1|PIM2|PLAC8|PLAGL1|PNP|SH2D3C|SLC43A3|SMARCA2|SNX18|TBL1XR1|TCEB3|TESC|TLE1|TNFRSF13B|TSEN2|EXCLUDED_GENES:|CCND2|PTPN1
MODULE_118	MSigDB_C4	15	407	6.80585	2.56763	3.6855	1	3.19133	0.00381394	0.0502474	++	C5ORF30|CD37|DBN1|GYG1|HCK|IGHM|IGSF3|KIF14|MCM2|MNDA|PDE4B|PNP|RAC2|SLA|TGFBR2|EXCLUDED_GENES:|CCND2
STK33_NOMO_UP	MSigDB_C6	12	291	4.86846	2.17527	4.12371	1	3.27846	0.00385546	0.0506957	+*/+*	ACSM3|ANKRD12|ARNT2|BCL3|DUSP5|FNDC3A|IL10|IL10RA|TGIF1|UBE2W|ULK2|ZMYND11
FARMER_BREAST_CANCER_BASAL_VS_LULMINAL	MSigDB_C2	13	329	5.50413	2.30908	3.95137	1	3.24626	0.00385617	0.0506957	+*	BCL2|C5ORF30|CD44|CHST2|CSDA|KIF14|LYN|RNF138|SIDT1|SLC19A2|SLC43A3|U2SURP|UGCG|EXCLUDED_GENES:|FUT8
RODRIGUES_THYROID_CARCINOMA_ANAPLASTIC_DN	MSigDB_C2	18	531	8.88226	2.92298	3.38983	1	3.11933	0.00390358	0.0512646	+*/++	ARHGAP24|B9D1|BCL2|CREB3L2|DCAF17|EPM2AIP1|FAM46C|FECH|FKBP11|GPM6A|LBH|MAN1A1|PEBP1|PHACTR2|RILPL2|SMARCA2|ST3GAL5|TCF4|EXCLUDED_GENES:|FOXP1
MODULE_255	MSigDB_C4	16	449	7.51039	2.69281	3.56347	1	3.1527	0.00395402	0.0518719	++	C6ORF106|CELF2|CHD1|COCH|EPS15L1|FAM108C1|LEPROTL1|MOCOS|PLEKHG1|PTPLA|RNASE6|SLAMF7|STAMBPL1|STAT3|UGCG|ZNF107
Human StemCell_Udayakumar06_458genes (16574658-SuppTable1)	GeneSigDB	14	369	6.17258	2.44526	3.79404	1	3.20106	0.00396265	0.05193	++	BPGM|CD47|DUSP5|EHD1|EML4|FECH|HIST1H1C|MAPKAPK2|MTDH|POLR3G|SOGA2|SUB1|TRAFD1|ZMYND11|EXCLUDED_GENES:|PIM1
ZHANG_TLX_TARGETS_36HR_UP	MSigDB_C2	10	219	3.66267	1.88945	4.56621	1	3.35406	0.00397623	0.0520529	+*/**	AEN|ARNT2|GAB2|HIST1H1C|IER5|PARP3|SLC19A2|SP110|ST6GALNAC4|TGFBR2|EXCLUDED_GENES:|CCND2
TSAI_DNAJB4_TARGETS_DN	MSigDB_C2	2	6	0.100091	0.313504	33.3333	1	6.06023	0.00400367	0.0521911	**/+*	CD44|NOLC1
chr3q	MSigDB_C1	2	6	0.1003	0.313834	33.3333	1	6.05319	0.00400367	0.0521911	+*	PCYT1A|SLC33A1
Mouse Leukemia_Mackus05_08genes (15674362-SuppTable3)	GeneSigDB	2	6	0.100459	0.313964	33.3333	1	6.0502	0.00400367	0.0521911	+*	BCL2|CFLAR|EXCLUDED_GENES:|BMF
Human Leukemia_Erkeland06_68genes (16423987-SuppTable3g)	GeneSigDB	4	39	0.651335	0.799859	10.2564	1	4.18657	0.00399502	0.0521911	++	HCK|HSP90B1|IL17RB|PARVB|EXCLUDED_GENES:|CCND2|PIM1
REACTOME_OLFACTORY_SIGNALING_PATHWAY	MSigDB_C2	0	324	5.42312	2.29673	0	0	-2.36124	0.00408234	0.0531607	--
Human Lung_not_cancer_Golpon04_150genes (15284076-Figure1)	GeneSigDB	7	120	2.00704	1.40145	5.83333	1	3.56271	0.00410894	0.0534508	+*	EBNA1BP2|GCDH|GTF3A|NDUFV2|PTPRJ|TCF4|UMPS
GAVIN_FOXP3_TARGETS_CLUSTER_T4	MSigDB_C2	6	91	1.52199	1.22164	6.59341	1	3.66557	0.00426134	0.0553751	+*	BMPR2|CD44|IL2RA|ITGAE|SMU1|SNX18|EXCLUDED_GENES:|IRF4|SH3BP5
OUYANG_PROSTATE_CANCER_PROGRESSION_UP	MSigDB_C2	3	20	0.333953	0.572989	15	1	4.65287	0.00428552	0.0553983	+*/**	IGHM|PRKCB|STAT3
REGULATION_OF_JNK_ACTIVITY	MSigDB_C5	3	20	0.334784	0.573153	15	1	4.6501	0.00428552	0.0553983	+*	MAP3K5|PAK1|PDCD4
KUROZUMI_RESPONSE_TO_ONCOCYTIC_VIRUS_AND_CYCLIC_RGD	MSigDB_C2	3	20	0.334178	0.573382	15	1	4.64929	0.00428552	0.0553983	+*	CCL22|IL10|IL10RA
Human Leukemia_Fung05_23genes (15735688-Table1)	GeneSigDB	3	20	0.334615	0.573381	15	1	4.64854	0.00428552	0.0553983	+*	IL2RA|MAT2A|NOLC1|EXCLUDED_GENES:|CCND2|IRF4
Human StemCell_Ehrchen07_23genes (17018861-Table1)	GeneSigDB	3	20	0.334459	0.573509	15	1	4.64778	0.00428552	0.0553983	+*	GCLC|GLO1|IL10
Human Colon_Dessein10_211genes (20460542-SuppTable2)	GeneSigDB	12	295	4.93323	2.18948	4.0678	1	3.22761	0.0042952	0.0554655	++	CCDC50|CNBP|COL9A3|DBN1|DNMT3A|PAK2|PARL|RAC2|TESC|TOMM70A|UBA5|UMPS|EXCLUDED_GENES:|PIM1
RHODES_CANCER_META_SIGNATURE	MSigDB_C2	5	64	1.07048	1.02347	7.8125	1	3.83939	0.00433912	0.0559742	++	COPB2|MANF|MRPL3|TARS|TGIF1
GNF2_NS	MSigDB_C4	4	40	0.66877	0.809948	10	1	4.11289	0.00438122	0.0561322	++	ABCE1|GLO1|GNL3|MRPL3
VANASSE_BCL2_TARGETS_UP	MSigDB_C2	4	40	0.669121	0.81033	10	1	4.11052	0.00438122	0.0561322	+*/*+	BCL2|FAM46C|HIST1H1C|IGHM
Human Lymphoma_Satoh05_50genes (15755681-SuppTable2)	GeneSigDB	4	40	0.668586	0.811236	10	1	4.10659	0.00438122	0.0561322	+*	BCL2|BCL3|GABPB1|RAB7L1
NEGATIVE_REGULATION_OF_TRANSCRIPTION	MSigDB_C5	9	187	3.12884	1.74604	4.81283	1	3.36255	0.00438313	0.0561322	+*	BCL3|CSDA|GCLC|PDCD4|STAT3|TGIF1|TLE1|ZBTB32|ZMYND11
E2F1_UP.V1_UP	MSigDB_C6	9	187	3.12885	1.748	4.81283	1	3.35878	0.00438313	0.0561322	+*/*+	BCL2|GRWD1|IVNS1ABP|KLHL21|LPIN2|NOLC1|TLE4|TYMS|UCK2|EXCLUDED_GENES:|PIM1
CAIRO_LIVER_DEVELOPMENT_DN	MSigDB_C2	10	222	3.71351	1.90332	4.5045	1	3.3029	0.00437352	0.0561322	*+/+*	FKBP11|GCDH|KIF13B|LPIN2|NABP1|NGLY1|PCK2|PECR|PLAC8|SLC27A5
MODULE_11	MSigDB_C4	18	537	8.98393	2.93906	3.35196	1	3.06767	0.00438043	0.0561322	++	AP3M2|ARNT2|C5ORF30|CD200|CD37|CELF2|CHN2|COL9A3|DBN1|ELL2|GCLC|GPM6A|IGSF3|PDE4B|PRKCB|ST3GAL5|ST6GALNAC4|TLE1|EXCLUDED_GENES:|CCND2
MGGAAGTG_V$GABP_B	MSigDB_C3	23	754	12.6131	3.46593	3.0504	1	2.99686	0.00440708	0.0563802	+*	CACNA1D|CCR7|CLINT1|CTR9|DUSP5|FGD2|GAB2|GRWD1|IL2RA|LEPROTL1|LIMD1|MRPL3|PTPN2|SCAMP2|SEC13|SIK3|SMC6|SMU1|TFRC|TLK1|TNFRSF13B|ZADH2|ZBTB11|EXCLUDED_GENES:|BMF|FOXP1|PTPN1
GOBERT_OLIGODENDROCYTE_DIFFERENTIATION_DN	MSigDB_C2	30	1073	17.9523	4.10706	2.7959	1	2.93341	0.00441161	0.0563802	++/++	ABHD10|ANKRD12|CHML|CHN2|DBN1|DNMT3A|EHD1|ELOVL7|FA2H|GAB1|GNPTAB|HIST1H1C|IER5|LMAN1|MAP3K5|MARCKS|NFKBIB|PAK1|PARP3|PDCD4|PDE4B|PLEKHG1|PLK3|SCAMP2|SLC2A13|SMARCA2|TET2|TUBB4A|ULK2|WDFY1|EXCLUDED_GENES:|BMF|FOXP1
Monocyte_8x_U133plus	SignatureDB	7	122	2.03928	1.41163	5.7377	1	3.51418	0.00449799	0.0573066	+*	ATP13A3|ELOVL7|HCK|LILRA2|LILRA3|LILRB2|MARCKS
Mouse Lung_not_cancer_Kahnert06_163genes (16479545-SuppTable1)	GeneSigDB	7	122	2.04155	1.41475	5.7377	1	3.50483	0.00449799	0.0573066	+*	ARHGEF3|BATF|CFLAR|EHD1|GPD2|GPR183|NFKBIZ
Human Colon_Graudens06_863genes (16542501-SuppTable3)	GeneSigDB	22	711	11.8962	3.37336	3.09423	1	2.99518	0.0044941	0.0573066	++	BCL3|C16ORF5|C5ORF30|COL9A3|DBN1|FA2H|GLO1|HPDL|LITAF|LYN|MARCH3|MCM2|MTHFD1|P2RX5|PCK2|PLK3|SLC38A5|SLC43A3|ST6GALNAC4|TFRC|TYMS|UBE2W|EXCLUDED_GENES:|CCND2|PIM1|SH3BP5
Mouse StemCell_Ulloa-Montoya07_757genes (17683608-TableS2)	GeneSigDB	20	624	10.4368	3.16227	3.20513	1	3.02417	0.00451353	0.0574453	+*	ARID3B|CDYL|CNBP|EBNA1BP2|EHHADH|EML4|FAM100B|GAB1|GCDH|GRWD1|HK2|IVNS1ABP|MCM2|NFKBIB|NOLC1|PHF16|PLAGL1|POLR3G|TLE1|TLE4
Human Breast_Pothuri10_361genes (20436685-ST5-1)	GeneSigDB	14	375	6.27179	2.46675	3.73333	1	3.13295	0.00456097	0.0579895	+*	ANP32A|ANXA11|C5ORF45|CD44|DLEU1|GPR183|IPO4|LSG1|PAK2|SIDT1|SLC33A1|SP110|TYMS|USP46|EXCLUDED_GENES:|FUT8
TTTGTAG,MIR-520D	MSigDB_C3	13	336	5.61802	2.33496	3.86905	1	3.1615	0.00459399	0.0583494	++	C16ORF5|CELF2|COCH|FNBP1L|GPM6A|IER5|PDCD4|PTPN2|RDX|TBL1XR1|TSHZ1|UBE2E3|UBE2W
RGAGGAARY_V$PU1_Q6	MSigDB_C3	17	498	8.32875	2.83027	3.41365	1	3.06375	0.00463559	0.0588173	+*	ANP32A|ATP1B3|BCL2|CACNA1D|CCR7|CD37|CHD2|DNMT3A|FAM100B|FGD2|LYN|P2RY10|PTPRJ|RAC2|SH2D3C|SIK3|USP46|EXCLUDED_GENES:|ETV6
TTTTGAG,MIR-373	MSigDB_C3	10	224	3.74584	1.91034	4.46429	1	3.27384	0.00465531	0.0589541	+*	C6ORF106|CHST2|CLINT1|CSNK1E|DCAF17|NABP1|SLC38A2|ST3GAL5|TBL1XR1|WDFY1|EXCLUDED_GENES:|BLNK
Human Breast_Martin09_485genes (19225562-TableS1)	GeneSigDB	15	416	6.9594	2.59431	3.60577	1	3.09932	0.0046559	0.0589541	++	BPGM|CD47|COL9A3|ENOSF1|FNBP1L|IGHM|MCM2|NEK3|OAS1|PHF16|PLAGL1|TOR1AIP1|VASH2|XK|ZMYND11
Human Lung_Hoang05_181genes (16289389-TableS1)	GeneSigDB	8	155	2.59203	1.59407	5.16129	1	3.39255	0.00467036	0.0590767	+*	CCR7|HEATR6|IGHM|IKZF1|LILRA4|PDCD4|PRKCB|S1PR1|EXCLUDED_GENES:|CCND2|IL16
MODULE_208	MSigDB_C4	7	123	2.05935	1.42002	5.69106	1	3.47927	0.00470264	0.0594243	+*	CCL18|CD200|IGHM|KCNA3|OAS1|P2RY10|S1PR1|EXCLUDED_GENES:|FOXP1
Human Brain_Lastowska07_548genes (17533364-TableS3)	GeneSigDB	13	337	5.63685	2.33522	3.85757	1	3.15308	0.0047081	0.0594325	+*	CACNA1D|EPM2AIP1|GNL3|LIMD1|NGLY1|OXSR1|PAK1|RAB30|RDX|SIK3|SMARCC1|THYN1|WDR6|EXCLUDED_GENES:|FOXP1
V$MAX_01	MSigDB_C3	11	261	4.36442	2.06018	4.21456	1	3.22087	0.00472412	0.059574	+*	ANKRD12|DNMT3A|FKBP11|IQGAP2|MANF|MAT2A|MTHFD1|SLC38A2|SLC38A5|TCF4|TFRC
GENTILE_UV_RESPONSE_CLUSTER_D2	MSigDB_C2	4	41	0.685006	0.819694	9.7561	1	4.04419	0.00479181	0.0601212	+*	CHD1|DUSP5|MAT2A|PDE4B
Human Lymphoma_Staege08_50genes_UpRegulated_HodgkinlymphvNorm (18400362-Figure1a)	GeneSigDB	4	41	0.685207	0.820113	9.7561	1	4.04187	0.00479181	0.0601212	+*	BATF|MCM2|RRP9|UCK2|EXCLUDED_GENES:|CCND2|IRF4
Human Lymphoma_OrtegaPaino08_46genes (18024791-Table2)	GeneSigDB	4	41	0.686491	0.820541	9.7561	1	4.0382	0.00479181	0.0601212	+*	DBN1|DUSP5|OAS1|PRKCB
ELVIDGE_HIF1A_AND_HIF2A_TARGETS_UP	MSigDB_C2	4	41	0.686369	0.820864	9.7561	1	4.03676	0.00479181	0.0601212	+*/*+	CCDC86|GYG1|IDH3A|LSG1
Human Colon_Grade07_1102genes (17210682-SuppTable3)	GeneSigDB	25	849	14.1959	3.67486	2.94464	1	2.93999	0.00477869	0.0601212	+*	ALG3|ANP32A|ATP13A3|CCR7|CNTNAP1|CSNK1E|EML4|EPM2AIP1|GTF3A|HIST1H1C|HSP90B1|PARP4|POLR1C|PPIB|SEC13|SEC61A1|SEC61B|SLC27A5|SMARCC1|SUB1|SUSD1|TARS|TGIF1|ZNF107|ZNF511
RAY_TUMORIGENESIS_BY_ERBB2_CDC25A_DN	MSigDB_C2	8	156	2.60848	1.59757	5.12821	1	3.37482	0.004853	0.0607182	*+/++	ARHGEF3|BSPRY|CHN2|GABPB1|LOC645638|PHACTR1|SP100|TCF4|EXCLUDED_GENES:|BLNK
LEF1_UP.V1_DN	MSigDB_C6	9	190	3.17519	1.76023	4.73684	1	3.30911	0.00485903	0.0607182	++/++	C5ORF45|COCH|IL17RB|MOCOS|OAS1|PAK1|PLAC8|RAC2|XK
Human Leukemia_Yagi03_213genes (12738660-TableS3)	GeneSigDB	9	190	3.17913	1.7627	4.73684	1	3.30225	0.00485903	0.0607182	++	CD200|CTR9|CYB5B|DLEU1|ELL2|MAN1A1|PIM2|TGIF1|ULK2
MORF_PRKDC	MSigDB_C4	9	190	3.17895	1.76293	4.73684	1	3.30192	0.00485903	0.0607182	+*	ALG3|ANP32A|ARID3A|DCTD|IDH3A|MCM2|SMARCC1|TARS|TYMS
WOTTON_RUNX_TARGETS_UP	MSigDB_C2	3	21	0.350612	0.586784	14.2857	1	4.5151	0.00493838	0.0613001	++/**	C9ORF91|ST3GAL5|UGCG
Human Lymphoma_Kaminski03_33genes (12946996-Table3)	GeneSigDB	3	21	0.350447	0.587096	14.2857	1	4.51298	0.00493838	0.0613001	+*	IL10|IL10RA|IL2RA|EXCLUDED_GENES:|IL16
Human Liver_Chan09_22genes (19749797-Table2)	GeneSigDB	3	21	0.35109	0.587399	14.2857	1	4.50955	0.00493838	0.0613001	+*	PAK1|PLAGL1|PTPRJ
CHEOK_RESPONSE_TO_MERCAPTOPURINE_AND_LD_MTX_DN	MSigDB_C2	3	21	0.351379	0.587345	14.2857	1	4.50948	0.00493838	0.0613001	**/+*	CDKL1|FZD6|TCTN3
Human Lung_Dracheva07_24genes (17161497-Table3)	GeneSigDB	3	21	0.352033	0.588017	14.2857	1	4.50321	0.00493838	0.0613001	+*	HCK|PAK1|RASGRF1
LIN_NPAS4_TARGETS_DN	MSigDB_C2	5	66	1.10333	1.0388	7.57576	1	3.75113	0.00495019	0.0613001	**/+*	CSDA|DDI2|IER5|TESC|ZNF275
MARSON_FOXP3_TARGETS_UP	MSigDB_C2	5	66	1.10339	1.0403	7.57576	1	3.74567	0.00495019	0.0613001	++/+*	CD44|CELF2|PNP|RAC2|SNX18
Human Leukemia_Juric07_85genes (17312329-SuppTable3)	GeneSigDB	5	66	1.10433	1.04127	7.57576	1	3.74128	0.00495019	0.0613001	++	CD200|FZD6|GAB1|MAN1A1|TRAM2|EXCLUDED_GENES:|SH3BP5
MODULE_345	MSigDB_C4	7	124	2.07476	1.42613	5.64516	1	3.45358	0.00491423	0.0613001	+*	CCL18|CD37|IGHM|KIAA0226L|OAS1|P2RY10|SPIB|EXCLUDED_GENES:|BLNK|FOXP1
SATO_SILENCED_BY_METHYLATION_IN_PANCREATIC_CANCER_1	MSigDB_C2	15	419	7.00979	2.60329	3.57995	1	3.06927	0.00496801	0.0614593	+*	ADAM8|CCL22|CD200|CYB5R2|DUSP5|ENOSF1|GMFG|IGHM|NETO2|OAS1|PAK2|RAC2|SMARCA2|TRAFD1|ULK2
YAGI_AML_FAB_MARKERS	MSigDB_C2	9	191	3.19128	1.76256	4.71204	1	3.29562	0.00502627	0.0621178	++	CD200|CTR9|CYB5B|DLEU1|ELL2|MAN1A1|PIM2|TGIF1|ULK2
Human Lymphoma_Tome05_357genes (16081686-SuppTable2)	GeneSigDB	8	157	2.62546	1.60114	5.09554	1	3.3567	0.00504106	0.0621764	++	B9D1|CCL18|CD44|LAG3|LITAF|MARCKS|PARVB|TCTN3
Mouse Breast_Crawford07_981genes (18081427-TableS8)	GeneSigDB	21	674	11.2726	3.29024	3.11573	1	2.95645	0.00503664	0.0621764	++	B9D1|BBIP1|BCL2|IER5|IGSF3|IVNS1ABP|LIMD1|LITAF|MARCKS|MNDA|PCK2|PDCD4|PDE4B|PION|PTPRJ|SCAPER|SMARCA2|ST3GAL5|STAT3|TGIF1|TRAM2|EXCLUDED_GENES:|FOXP1
Human Leukemia_Langer08_174genes (18378853-TableS1)	GeneSigDB	7	125	2.08816	1.43057	5.6	1	3.4335	0.00513291	0.0630738	++	C5ORF30|CABLES1|CD200|FZD6|LEPROTL1|PLAGL1|RAVER2
MULLIGHAN_NPM1_MUTATED_SIGNATURE_1_DN	MSigDB_C2	7	125	2.09464	1.43187	5.6	1	3.42584	0.00513291	0.0630738	**/+*	ARID3B|C7ORF23|CD200|CHST7|DUSP5|EHD1|RRP9
V$IK2_01	MSigDB_C3	11	264	4.41448	2.0708	4.16667	1	3.18017	0.00513931	0.0630738	++	ATXN7L1|BCL2|BCL3|BMPR2|FNBP1L|GPM6A|HIVEP1|MYOCD|NFKBID|TGIF1|ZADH2|EXCLUDED_GENES:|BLNK|BMF
V$OCT1_06	MSigDB_C3	11	264	4.4184	2.07506	4.16667	1	3.17177	0.00513931	0.0630738	++	AICDA|ATP13A3|BCL2|CACNA1D|CELF2|CHD2|CHML|GPM6A|KCTD5|P2RY10|PIM2|EXCLUDED_GENES:|FOXP1|PTPN1
NEGATIVE_REGULATION_OF_BIOLOGICAL_PROCESS	MSigDB_C5	21	675	11.2888	3.28696	3.11111	1	2.95447	0.00512034	0.0630738	+*	ADRB2|AVEN|BCL2|BCL2L10|BCL3|CFLAR|CSDA|ERN1|FAIM3|GCLC|GLO1|HSP90B1|IL10|PDCD4|PLAGL1|STAT3|TGIF1|TLE1|TNFAIP8|ZBTB32|ZMYND11|EXCLUDED_GENES:|PIM1
Human Lymphoma_Sriuranpong04_670genes_Epithelium(N)Metaplastic_DisplasticLesions(R)Carcinoma(T) (15297395-SuppTable1)	GeneSigDB	16	462	7.72669	2.73406	3.4632	1	3.02602	0.00517859	0.063493	++	ACPP|ANP32A|ARNT2|BCL3|CASP10|EBNA1BP2|EIF4G1|KIF13B|KIF14|KLHL21|MOCOS|MTDH|NOLC1|RAB7L1|SPIB|TUBB4A|EXCLUDED_GENES:|ENTPD1
RAF_UP.V1_UP	MSigDB_C6	9	192	3.21201	1.77057	4.6875	1	3.269	0.00519794	0.0636671	++/++	ARHGEF3|BPGM|CD44|CREB3L2|LEPREL1|MAN1A1|MAP3K5|PTPLA|TNFAIP8|EXCLUDED_GENES:|BLNK
REACTOME_IL_3_5_AND_GM_CSF_SIGNALING	MSigDB_C2	4	42	0.702705	0.83019	9.52381	1	3.97174	0.00522747	0.06375	+*	GAB2|HCK|IL2RA|LYN|EXCLUDED_GENES:|BLNK
Blood_Module-2.2_Neutrophils	SignatureDB	4	42	0.701529	0.830497	9.52381	1	3.97168	0.00522747	0.06375	+*	BPGM|CSDA|FECH|UGCG
Human Leukemia_Wlodarski08_51genes (18086899-Table5)	GeneSigDB	4	42	0.703171	0.831108	9.52381	1	3.96679	0.00522747	0.06375	+*	BCL2|BCL3|CD44|LYN|EXCLUDED_GENES:|FOXP1
PID_TCPTP_PATHWAY	MSigDB_C2	4	42	0.702486	0.831459	9.52381	1	3.96594	0.00522747	0.06375	+*	GAB1|LMAN1|PTPN2|STAT3|EXCLUDED_GENES:|PTPN1
Human Brain_Castells09_424gebes (19861896-SuppTable1)	GeneSigDB	14	381	6.37252	2.48078	3.67454	1	3.07462	0.00523047	0.06375	++	ANXA11|CNTNAP1|DCTD|FNDC3A|GPM6A|PDE4B|PLAGL1|PNP|POLR1C|RAVER2|S1PR1|SP100|TNFAIP8|TUBB4A|EXCLUDED_GENES:|SH3BP5
V$HP1SITEFACTOR_Q6	MSigDB_C3	10	228	3.81396	1.92791	4.38596	1	3.20868	0.00526165	0.0640668	+*	CHD2|EML4|NOSIP|P2RY10|PHF16|TET2|TGIF1|TLE4|XK|ZADH2
CHIARETTI_ACUTE_LYMPHOBLASTIC_LEUKEMIA_ZAP70	MSigDB_C2	5	67	1.12035	1.04683	7.46269	1	3.7061	0.00527753	0.0641339	++	ANXA11|CASP10|CD200|EPM2AIP1|GAB1
SETLUR_PROSTATE_CANCER_TMPRSS2_ERG_FUSION_UP	MSigDB_C2	5	67	1.12136	1.04742	7.46269	1	3.70306	0.00527753	0.0641339	++/**	CACNA1D|DBN1|MAP3K5|RAB30|TLE1
FEVR_CTNNB1_TARGETS_UP	MSigDB_C2	21	677	11.3252	3.29385	3.10192	1	2.93722	0.0052912	0.0642369	++/+*	AP3M2|C5ORF30|CACNA1D|CHD2|CHST2|FKBP11|GCLC|GLO1|GPD2|HCK|HIST1H1C|IER5|KCTD5|LITAF|LPIN2|NEK3|OAS1|PLEKHG1|SEC61A1|STAT3|UGCG|EXCLUDED_GENES:|PIM1
LIU_VMYB_TARGETS_UP	MSigDB_C2	7	126	2.10675	1.4335	5.55556	1	3.41349	0.00535881	0.0649303	++	IL17RB|MAPKAPK2|MARCH3|NGLY1|PDCD4|PIM2|ULK2
MISSIAGLIA_REGULATED_BY_METHYLATION_UP	MSigDB_C2	7	126	2.10663	1.43406	5.55556	1	3.41225	0.00535881	0.0649303	+*/**	DUSP5|HIST1H2AC|OAS1|SCAMP2|SP110|ST3GAL5|TMEM184B
TAKEDA_TARGETS_OF_NUP98_HOXA9_FUSION_10D_UP	MSigDB_C2	9	193	3.22853	1.77421	4.66321	1	3.25299	0.00537413	0.0649886	++/**	AFF3|BTLA|CLECL1|DBN1|LILRA2|MCOLN2|MIR155HG|OAS1|SP110
RAF_UP.V1_DN	MSigDB_C6	9	193	3.23031	1.77547	4.66321	1	3.24967	0.00537413	0.0649886	++/++	ARNT2|BCL2|C9ORF91|COL9A3|FTSJ1|GPD2|PDCD4|SIDT1|SLC19A2
Human Breast_Desmedt08_469genes_ESR1_Module (18698033-tableS1-ESR1)	GeneSigDB	16	464	7.76089	2.73478	3.44828	1	3.01271	0.0053918	0.0651386	++	CHST2|COL9A3|CREB3L2|CSDA|DUSP5|ECI1|EPS15L1|HIVEP1|KIF13B|PDCD4|PTPLA|SACS|SIDT1|TFRC|UBE2E3|UCK2|EXCLUDED_GENES:|FUT8
Thymic_SP_CD4+Tcell_gt_Blood_CD4+Tcell	SignatureDB	6	96	1.60401	1.25404	6.25	1	3.50545	0.00552995	0.0667424	++	CD200|CHST2|HIST1H2AC|MARCKS|RNASE6|TOX2
PALOMERO_GSI_SENSITIVITY_UP	MSigDB_C2	2	7	0.116683	0.338447	28.5714	1	5.56459	0.00554328	0.066773	+*/**	PHTF1|PIAS2
Human Viral_Stoff-Khalili06_7genes (16410819-Table2)	GeneSigDB	2	7	0.117165	0.338956	28.5714	1	5.5548	0.00554328	0.066773	+*	PDCD4|PECR
V$PBX1_02	MSigDB_C3	7	127	2.12758	1.44178	5.51181	1	3.37946	0.00559209	0.0672955	+*	CYB5R2|NOSIP|SLC43A3|SMC6|TLE1|TLE4|TLK1|EXCLUDED_GENES:|CCND2
Human Leukemia_Erkeland06_199genes (16423987-SuppTable3d)	GeneSigDB	5	68	1.13911	1.05593	7.35294	1	3.6564	0.00561989	0.0674987	++	HCK|HSP90B1|IL17RB|PARVB|SLC38A2|EXCLUDED_GENES:|CCND2|PIM1
SESTO_RESPONSE_TO_UV_C7	MSigDB_C2	5	68	1.13841	1.05673	7.35294	1	3.65427	0.00561989	0.0674987	+*	ATP1B3|CKAP4|MTHFD1|PCK2|PPIB
Human Testicular_Sugimura04_31genes (15073113-Table1)	GeneSigDB	3	22	0.36811	0.602257	13.6364	1	4.37005	0.00564797	0.0677702	+*	CELF2|PIM2|TCF4
NAKAMURA_METASTASIS_MODEL_DN	MSigDB_C2	4	43	0.717767	0.839473	9.30233	1	3.90988	0.00568886	0.067997	**/+*	CD44|LEPREL1|RAC2|UGCG
CHUNG_BLISTER_CYTOTOXICITY_DN	MSigDB_C2	4	43	0.718662	0.84005	9.30233	1	3.90612	0.00568886	0.067997	**/++	HIST1H2AC|MNDA|PDLIM1|PRKCB
KLEIN_TARGETS_OF_BCR_ABL1_FUSION	MSigDB_C2	4	43	0.72016	0.840132	9.30233	1	3.90396	0.00568886	0.067997	+*	IKZF1|MNDA|SPIB|TNFRSF13B|EXCLUDED_GENES:|BLNK|IRF4
Human Immune_Sillanp04_48genes (15482854-Table2)	GeneSigDB	4	43	0.719569	0.840307	9.30233	1	3.90385	0.00568886	0.067997	+*	CCL22|CCR7|CD37|SPIB
MODULE_179	MSigDB_C4	16	467	7.81287	2.74464	3.42612	1	2.98295	0.00572494	0.0683622	++	C6ORF106|CELF2|CHD1|COCH|EPS15L1|FAM108C1|LEPROTL1|MOCOS|PLEKHG1|PTPLA|RNASE6|SLAMF7|STAMBPL1|STAT3|UGCG|ZNF107
ZWANG_TRANSIENTLY_UP_BY_2ND_EGF_PULSE_ONLY	MSigDB_C2	16	1711	28.6107	5.11465	0.935126	0	-2.46562	0.00577128	0.068849	-+	ACSM3|BSPRY|C6ORF123|CCR10|CYB5R2|DNMT3A|LILRA2|LPCAT4|NEK3|PHACTR2|SACS|SNX18|TNFAIP8|TUBB4A|ZBTB32|ZNF385C|EXCLUDED_GENES:|IRF4
TAKAO_RESPONSE_TO_UVB_RADIATION_DN	MSigDB_C2	6	97	1.62338	1.25972	6.18557	1	3.47429	0.00581354	0.0692864	**/+*	CLINT1|HIST1H2AC|MARCKS|NOLC1|TCEB3|UGCG|EXCLUDED_GENES:|CCND2
CRX_NRL_DN.V1_DN	MSigDB_C6	7	128	2.14108	1.44749	5.46875	1	3.3568	0.00583289	0.0694501	**/+*	ADRB2|BSPRY|ELOVL7|MINA|MYOCD|PNP|XK
Human Breast_Laere08_263genes (19010862-TableS1)	GeneSigDB	9	196	3.27517	1.7868	4.59184	1	3.20396	0.00593052	0.070477	+*	AFF3|BCL2|BSPRY|C5ORF30|CFLAR|HOOK1|IGHM|IL10RA|LYN
EGFR_UP.V1_DN	MSigDB_C6	9	196	3.27846	1.78614	4.59184	1	3.2033	0.00593052	0.070477	++/++	BCL2|COL9A3|HIST1H1C|HIST1H2AC|MOCOS|PDCD4|TBL1XR1|XK|ZNF107
BOYLAN_MULTIPLE_MYELOMA_PCA3_DN	MSigDB_C2	5	69	1.15457	1.06439	7.24638	1	3.6128	0.00597761	0.0708324	*+/+*	EHHADH|LOC645638|MARCKS|RDX|ST3GAL5
Human Leukemia_Chiaretti06_75genes (16160012-Table1)	GeneSigDB	5	69	1.15543	1.06445	7.24638	1	3.6118	0.00597761	0.0708324	++	ANXA11|CASP10|CD200|EPM2AIP1|GAB1
TGACAGNY_V$MEIS1_01	MSigDB_C3	24	819	13.7011	3.6011	2.9304	1	2.85994	0.00597686	0.0708324	++	ANKRD12|CD47|CHD2|CHN2|CKAP4|COCH|DCAF17|GAB2|GPM6A|METTL8|PDLIM1|PIM2|RAC2|SH2D3C|SMARCA2|SPIB|ST3GAL5|TET2|TGIF1|TLE1|TLE4|TUBB4A|ZADH2|ZBTB11|EXCLUDED_GENES:|ENTPD1|IL16|PTPN1|SH3BP5
Human Colon_Mariadason03_420genes (14695196-Table2)	GeneSigDB	12	308	5.14995	2.23489	3.8961	1	3.06505	0.00600882	0.071134	+*	ADAMTS6|CKAP4|CNBP|LMAN1|MTHFD1|NEK3|PTPN2|PTPRJ|RDX|RNASE6|SACS|TBL1XR1
WHITFIELD_CELL_CYCLE_S	MSigDB_C2	8	162	2.71157	1.62898	4.93827	1	3.24648	0.00606636	0.0717466	+*	ABHD10|ACPP|CHML|ENOSF1|HIST1H2AC|PHTF1|SLC38A2|TYMS
Human StemCell_Fruehauf06_110genes (16863911-table1)	GeneSigDB	6	98	1.63851	1.26675	6.12245	1	3.44304	0.00610759	0.0721653	+*	CD200|CHD2|ELL2|GPR183|PNP|SUB1|EXCLUDED_GENES:|BLNK
Human Lymphoma_Germinal07_77genes (19455257-TableS8)	GeneSigDB	4	44	0.735708	0.848742	9.09091	1	3.84604	0.00617662	0.072634	++	HIST1H1C|IER5|MANF|TCEB3
chr3q22	MSigDB_C1	4	44	0.736684	0.849238	9.09091	1	3.84264	0.00617662	0.072634	+*	ATP1B3|MINA|SRPRB|UBA5
Human Lymphoma_Germinal07_44genes (19455257-TableS9)	GeneSigDB	4	44	0.73619	0.850018	9.09091	1	3.83969	0.00617662	0.072634	++	HIST1H1C|IER5|MANF|TCEB3
LIANG_HEMATOPOIESIS_STEM_CELL_NUMBER_LARGE_VS_TINY_UP	MSigDB_C2	4	44	0.73705	0.850546	9.09091	1	3.8363	0.00617662	0.072634	+*/**	FKBP11|GTF3A|MANF|ST6GALNAC4
Human pancreas_Yang09_44genes (17714734-Table4)	GeneSigDB	4	44	0.737551	0.851792	9.09091	1	3.8301	0.00617662	0.072634	+*	ARID3B|GABPB1|HSP90B1|SIK3
Human Brain_Chen-Plotkin08_747genes (18223198-TableS3)	GeneSigDB	19	600	10.0329	3.10357	3.16667	1	2.88927	0.00630273	0.0739807	++	ARHGEF3|C9ORF91|CD200|CD47|CFLAR|CNTNAP1|CREB3L2|IL17RB|LPCAT4|MNDA|NETO2|PLBD1|PRKCB|RAB7L1|RDX|SIDT1|SUB1|TUBB4A|XK|EXCLUDED_GENES:|BLNK
ACEVEDO_METHYLATED_IN_LIVER_CANCER_DN	MSigDB_C2	6	900	15.0506	3.77346	0.666667	0	-2.39848	0.0063031	0.0739807	-*	ARHGAP24|GRWD1|IKZF1|IL2RA|STAM|TMEM184B|EXCLUDED_GENES:|FOXP1
Serum_response_Fb_UP	SignatureDB	9	198	3.31061	1.79718	4.54545	1	3.16574	0.00632544	0.0740322	+*/+*	DLEU1|EBNA1BP2|EIF4G1|EPHB1|IPO4|MTHFD1|RNF138|UCK2|UMPS
V$FOXD3_01	MSigDB_C3	9	198	3.31131	1.79724	4.54545	1	3.16523	0.00632544	0.0740322	+*	AFF3|CHN2|CKAP4|EPHB1|MARCKS|MYOCD|TBL1XR1|TLE4|ZADH2
Human Breast_Creighton08_643genes (18794137-SuppTable1e)	GeneSigDB	16	472	7.89832	2.76149	3.38983	1	2.93381	0.00631715	0.0740322	++	COPB2|EHD1|ELL2|FAM108C1|GAB1|IGSF3|KIF13B|LITAF|LPIN2|PCYT1A|PLBD1|PTPRJ|TCF4|TRAFD1|TRAM2|ZNF275|EXCLUDED_GENES:|BLNK|FOXP1
ICHIBA_GRAFT_VERSUS_HOST_DISEASE_35D_UP	MSigDB_C2	7	130	2.17388	1.45822	5.38462	1	3.30959	0.00633763	0.0741048	+*/**	ATP1B3|HCK|LITAF|MPEG1|NABP1|NFKBIZ|PLAC8|EXCLUDED_GENES:|PTPN1
Mouse Leukemia_Walter04_85genes (15572690-SuppTable4)	GeneSigDB	5	70	1.17128	1.07216	7.14286	1	3.57103	0.00635106	0.0741917	+*	CELF2|EIF4G1|FAM100B|HIVEP1|IL12A
UROSEVIC_RESPONSE_TO_IMIQUIMOD	MSigDB_C2	3	23	0.383832	0.61362	13.0435	1	4.2635	0.00641555	0.0743831	+*	CCR7|OAS1|TRAFD1
KEGG_PROTEIN_EXPORT	MSigDB_C2	3	23	0.384311	0.61395	13.0435	1	4.26043	0.00641555	0.0743831	+*	SEC61A1|SEC61B|SRPRB
MULLIGAN_NTF3_SIGNALING_VIA_INSR_AND_IGF1R_UP	MSigDB_C2	3	23	0.38473	0.615155	13.0435	1	4.2514	0.00641555	0.0743831	+*/**	EBNA1BP2|GMPPB|GNL3
Human Lymphoma_Islam02_31genes (11920564-Table5b)	GeneSigDB	3	23	0.385423	0.615099	13.0435	1	4.25066	0.00641555	0.0743831	+*	CKAP4|IL10|MNDA|EXCLUDED_GENES:|CCND2
Human StemCell_Langer08_29genes (18378853-Table3a)	GeneSigDB	3	23	0.384932	0.615243	13.0435	1	4.25046	0.00641555	0.0743831	++	CD200|FZD6|PLAGL1
Human Liver_Farci10_50genes (20421498-TableS4)	GeneSigDB	3	23	0.386015	0.615797	13.0435	1	4.24488	0.00641555	0.0743831	+*	CCL18|IGHM|SLAMF7
chr10p14	MSigDB_C1	3	23	0.385748	0.615866	13.0435	1	4.24484	0.00641555	0.0743831	+*	PTPLA|STAM|ZMYND11
GRADE_COLON_AND_RECTAL_CANCER_DN	MSigDB_C2	6	99	1.65554	1.27274	6.06061	1	3.41348	0.00641233	0.0743831	+*/+*	CDK12|PARVB|PLAC8|TBC1D27|TLE4|TOX2
GCB_gt_ABC_U133plus	SignatureDB	0	297	4.96854	2.19824	0	0	-2.26024	0.00647466	0.0749982	-+
MORF_PPP1CC	MSigDB_C4	8	164	2.74127	1.63417	4.87805	1	3.21799	0.00651808	0.0753192	+*	ANP32A|DCTD|ERP29|MCM2|SMARCC1|TARS|TOMM70A|TYMS
AMIT_EGF_RESPONSE_480_HELA	MSigDB_C2	8	164	2.7419	1.63533	4.87805	1	3.21531	0.00651808	0.0753192	+*	B4GALT1|CD44|CDYL|EHD1|GABPB1|LEPREL1|LPCAT4|RNF126
Human StemCell_Dekker06_439genes (16455954-TableS2)	GeneSigDB	14	391	6.54253	2.51686	3.58056	1	2.96301	0.00652064	0.0753192	++	ATP1B3|BPGM|CABLES1|DBN1|HIVEP1|MAP3K5|MARCKS|NT5DC2|PCYT1A|PDE4B|PHACTR2|SLC38A2|TCF4|TFRC
TTTNNANAGCYR_UNKNOWN	MSigDB_C3	7	131	2.19196	1.46368	5.34351	1	3.28491	0.00660187	0.0761864	+*	BMPR2|HIST1H1C|HIST1H2AC|HIST1H2BB|TCF4|TGIF1|USP46|EXCLUDED_GENES:|BLNK|FOXP1
Human Colon_Grade06_621genes (16397240-SuppTable9)	GeneSigDB	15	433	7.2478	2.64504	3.4642	1	2.93085	0.00665687	0.0767494	+*	AP3B1|COPB2|EML4|EPHB1|GCLC|GMFG|IDH3A|KPTN|LILRB2|LPIN2|MAP3K5|MAT2A|NOLC1|PDCD4|TARS|EXCLUDED_GENES:|CCND2
Myeloma_LB_subgroup_UP	SignatureDB	4	45	0.752232	0.858939	8.88889	1	3.78114	0.00669138	0.0770755	+*/**	ADTRP|ARNT2|P2RX5|PARP15
Human Brain_Lu06_1128genes (16424041-SuppTable1)	GeneSigDB	28	1012	16.9206	3.99693	2.7668	1	2.77197	0.00671091	0.0772285	++	ADAM8|ALG3|BATF|CCL22|CHDH|CHML|COCH|EIF4G1|GCDH|GPR183|ITGAE|IVNS1ABP|KPTN|LAG3|MARCKS|MNDA|PIAS2|PLCL2|RRP9|SACS|SFTPB|SLC38A2|SMARCA2|SNX18|SUB1|TARS|TNFAIP8|UBE2E3|EXCLUDED_GENES:|IRF4
RICKMAN_HEAD_AND_NECK_CANCER_A	MSigDB_C2	6	100	1.67079	1.27839	6	1	3.38645	0.00672797	0.077281	+*	ARNT2|BCL2|CD200|COL9A3|SPIB|VASH2
Human StemCell_Colombo09_111genes (19123479-TableS1)	GeneSigDB	6	100	1.6724	1.2798	6	1	3.38147	0.00672797	0.077281	+*	ERN1|FAM100B|IER5|NT5DC2|PIM2|TMEM39A
KRIEG_KDM3A_TARGETS_NOT_HYPOXIA	MSigDB_C2	9	200	3.34381	1.80582	4.5	1	3.1322	0.00674028	0.0773506	+*	CD47|EHD1|GLO1|OAS1|PHACTR2|PTPN2|SEC13|SELRC1|UMPS
AAGCACT,MIR-520F	MSigDB_C3	10	237	3.96207	1.96314	4.21941	1	3.07565	0.00685191	0.0785589	+*	CELF2|FAM46C|FNDC3A|GAB2|MEX3C|RDX|SLC38A2|TBL1XR1|VASH2|ZBTB11|EXCLUDED_GENES:|CCND2
ATGTACA,MIR-493	MSigDB_C3	12	314	5.24965	2.25744	3.82166	1	2.99027	0.0069636	0.0796917	++	AFF3|BCL2|CELF2|GAB1|MTDH|SH2D3C|SMC6|TBL1XR1|TLE4|TM2D3|TRAM2|ZBTB11
DOUGLAS_BMI1_TARGETS_DN	MSigDB_C2	12	314	5.25272	2.25814	3.82166	1	2.98798	0.0069636	0.0796917	++/++	BPGM|C18ORF25|DCAF17|DDI2|FZD6|GPM6A|NFKBIZ|NGLY1|OAS1|PCYT1A|SLC33A1|SP100
SMIRNOV_RESPONSE_TO_IR_6HR_UP	MSigDB_C2	8	166	2.77723	1.64629	4.81928	1	3.17245	0.00699484	0.0799014	++/++	AEN|C16ORF5|FZD6|LOC100505650|NABP1|PDE4B|PHF16|SEC61A1
Human Ovarian_Wood03_173genes (12734205-TableS5)	GeneSigDB	8	166	2.77524	1.64842	4.81928	1	3.16955	0.00699484	0.0799014	++	B4GALT1|CD200|CD44|CHST7|HK2|LEPROTL1|PMM2|TFRC
Human Uterine_Vanharanta05_107genes (15940248-SuppTable2)	GeneSigDB	6	101	1.69074	1.28695	5.94059	1	3.34842	0.00705472	0.080511	+*	C19ORF10|EML4|POLR1C|PTPN2|RNF138|TNFAIP8
CREIGHTON_ENDOCRINE_THERAPY_RESISTANCE_5	MSigDB_C2	16	478	7.99348	2.77838	3.34728	1	2.88172	0.00709216	0.0808637	++	COPB2|EHD1|ELL2|FAM108C1|GAB1|IGSF3|KIF13B|LITAF|LPIN2|PCYT1A|PLBD1|PTPRJ|TCF4|TRAFD1|TRAM2|ZNF275|EXCLUDED_GENES:|BLNK|FOXP1
chr15q24	MSigDB_C1	5	72	1.20402	1.08604	6.94444	1	3.49525	0.00714652	0.0812588	+*	ADPGK|ARID3B|ARNT2|RASGRF1|SCAPER
REACTOME_METABOLISM_OF_NUCLEOTIDES	MSigDB_C2	5	72	1.20331	1.08649	6.94444	1	3.49444	0.00714652	0.0812588	+*	DCTD|PNP|TYMS|UCK2|UMPS
Human Bladder_Aaboe05_86genes (16265353-SuppTable2)	GeneSigDB	5	72	1.20514	1.08707	6.94444	1	3.49089	0.00714652	0.0812588	+*	GNL3|MRPL3|TFRC|TUBB4A|TYMS
GRUETZMANN_PANCREATIC_CANCER_DN	MSigDB_C2	9	202	3.37683	1.81715	4.45545	1	3.0945	0.00717568	0.0815154	*+/+*	ACSM3|CSDA|LMAN1|MAT2A|PCK2|PEBP1|RDX|SEC61B|SLC33A1|EXCLUDED_GENES:|CCND2
CHIANG_LIVER_CANCER_SUBCLASS_POLYSOMY7_DN	MSigDB_C2	3	24	0.400993	0.628123	12.5	1	4.13774	0.00724226	0.0816788	**/++	GNL3|P2RX5|PHACTR2
Human Ovarian_Manderson02_24genes (11779836-Table2)	GeneSigDB	3	24	0.40167	0.628165	12.5	1	4.13638	0.00724226	0.0816788	+*	GYG1|MANF|TFRC
Human Lung_Daniel09_50genes (19351829-Table1)	GeneSigDB	4	46	0.768748	0.867886	8.69565	1	3.72313	0.00723376	0.0816788	+*	COL9A3|GPD2|MCOLN2|MINA
Human Lymphoma_Saez09_67genes (19373655-Table2)	GeneSigDB	4	46	0.768377	0.868012	8.69565	1	3.72302	0.00723376	0.0816788	+*	EBNA1BP2|POLR1C|SP140|STAT3|EXCLUDED_GENES:|PIM1
Human Lung_Kakiuchi04_51genes (15496427-Table4)	GeneSigDB	4	46	0.768952	0.868853	8.69565	1	3.71875	0.00723376	0.0816788	+*	AVEN|DHRS13|GCLC|PLBD1
PEDERSEN_METASTASIS_BY_ERBB2_ISOFORM_1	MSigDB_C2	4	46	0.770041	0.870297	8.69565	1	3.71133	0.00723376	0.0816788	+*	DUSP5|MAP3K5|PLK3|STAMBPL1
Human Placenta_Cindrova-Davies07_93genes (17823277-Table2)	GeneSigDB	4	46	0.770985	0.870798	8.69565	1	3.70811	0.00723376	0.0816788	+*	CSNK1E|LYN|MAP3K5|ZNF614
TIEN_INTESTINE_PROBIOTICS_6HR_DN	MSigDB_C2	8	167	2.7938	1.6526	4.79042	1	3.15032	0.00724288	0.0816788	**/+*	CKAP4|CTR9|DBN1|FKBP11|GAB2|IQGAP2|SLC19A2|TCF4
V$IRF_Q6	MSigDB_C3	10	239	3.99588	1.97392	4.1841	1	3.04173	0.00725118	0.0816979	++	AKIRIN1|ATXN7L1|CYB5B|EHD1|SIK3|TBL1XR1|TOR1AIP1|ZADH2|ZBTB32|ZSCAN2|EXCLUDED_GENES:|ETV6|FUT8
Human Lymphoma_Islam02_10genes (11920564-Table2)	GeneSigDB	2	8	0.133453	0.361963	25	1	5.15673	0.00730958	0.0817603	+*	CD37|IKZF1
Human Sarcoma_Xie03_8genes (14576825-Table1)	GeneSigDB	2	8	0.133453	0.362206	25	1	5.15327	0.00730958	0.0817603	+*	CASP10|PLK3
Human Leukemia_Wlodarski08_11genes (18086899-Table4)	GeneSigDB	2	8	0.133694	0.362326	25	1	5.1509	0.00730958	0.0817603	+*	BCL2|CCR7
SCHAEFFER_PROSTATE_DEVELOPMENT_AND_CANCER_BOX5_DN	MSigDB_C2	2	8	0.133613	0.362429	25	1	5.14966	0.00730958	0.0817603	**/+*	TLE1|TUBB4A
Mouse Lymphoma_Park05_10genes_b (16140930-Table1b)	GeneSigDB	2	8	0.134003	0.362886	25	1	5.1421	0.00730958	0.0817603	+*	CD37|IL10RA
CAFFAREL_RESPONSE_TO_THC_24HR_3_UP	MSigDB_C2	2	8	0.133693	0.363097	25	1	5.13997	0.00730958	0.0817603	+*/**	CNBP|SEC61A1
Human Lung_Li07_10genes_Spt16 (17209051-Table3)	GeneSigDB	2	8	0.134288	0.363476	25	1	5.13297	0.00730958	0.0817603	+*	HIST1H1C|POLR3G
BRUINS_UVC_RESPONSE_VIA_TP53_GROUP_D	MSigDB_C2	11	277	4.63075	2.11929	3.97112	1	3.00537	0.00728301	0.0817603	++	CARD11|CFLAR|HOOK1|IL2RA|IPO4|KCNA3|PHACTR1|POLR3G|RNF138|SCAPER|UBA5
MODULE_27	MSigDB_C4	13	356	5.95286	2.3985	3.65169	1	2.93814	0.00734491	0.0820812	+*	ADRB2|CD69|CNTNAP1|EPHB1|GPR183|IL10RA|IL12A|IL2RA|LILRA2|LILRA3|LILRB2|P2RY10|TNFRSF13B
Human Intestine_Vecchi07_1024genes (17297478-SuppTable5)	GeneSigDB	23	788	13.1769	3.544	2.91878	1	2.77174	0.00736626	0.0822455	++	ABHD10|ADRB2|ADTRP|AFF3|ARHGAP24|CDK12|DUSP5|EBNA1BP2|ELL2|EML4|FAM46C|IGHM|IL17RB|KIF14|KLHL21|MCM2|MSRB1|NEK3|PCK2|SLAMF7|STAMBPL1|TFRC|ZNF511
DER_IFN_BETA_RESPONSE_UP	MSigDB_C2	6	102	1.70555	1.29196	5.88235	1	3.32398	0.00739279	0.0824673	+*/**	AP3M2|ARID3A|CTR9|OAS1|PARP4|SP110
PICCALUGA_ANGIOIMMUNOBLASTIC_LYMPHOMA_DN	MSigDB_C2	7	134	2.24503	1.48173	5.22388	1	3.20906	0.00744381	0.0829616	*+/++	CD69|CHD1|CHD2|IER5|IRF2BP2|MEX3C|SIK3|EXCLUDED_GENES:|FOXP1
TGAATGT,MIR-181A,MIR-181B,MIR-181C,MIR-181D	MSigDB_C3	16	481	8.04533	2.78577	3.3264	1	2.85547	0.0075074	0.083595	++	ADAMTS6|ARNT2|B4GALT1|BMPR2|CARD11|CDYL|DOCK10|DUSP5|FNDC3A|IVNS1ABP|MAT2A|MEX3C|PLCL2|SLC38A2|SOGA2|TBL1XR1|EXCLUDED_GENES:|ETV6|FOXP1
Human Leukemia_Kiiveri08_100genes_E2A-PBX1Parallel (18410693-TableS10)	GeneSigDB	5	73	1.2204	1.09409	6.84932	1	3.45455	0.00756921	0.0839808	++	GNPTAB|IGSF3|MAPKAPK2|PNP|SOGA2|EXCLUDED_GENES:|IRF4
HOSHIDA_LIVER_CANCER_SURVIVAL_UP	MSigDB_C2	5	73	1.22059	1.09424	6.84932	1	3.45391	0.00756921	0.0839808	++/**	BCL2|DUSP5|EPM2AIP1|SP100|TCF4
Human Leukemia_Rigolin10_82genes (20166207-Table6)	GeneSigDB	5	73	1.22023	1.09448	6.84932	1	3.45349	0.00756921	0.0839808	++	BCL2|CASP10|COL9A3|IL12A|TLE1
KEGG_B_CELL_RECEPTOR_SIGNALING_PATHWAY	MSigDB_C2	5	73	1.22187	1.09422	6.84932	1	3.45281	0.00756921	0.0839808	+*	CARD11|LYN|NFKBIB|PRKCB|RAC2|EXCLUDED_GENES:|BLNK
DOANE_RESPONSE_TO_ANDROGEN_DN	MSigDB_C2	10	241	4.03191	1.98126	4.14938	1	3.01226	0.00766821	0.0849269	**/++	ARHGEF3|CACNA1D|CDYL|HEATR6|LPCAT4|LPIN2|MARCKS|PDE4B|SP110|TLK1
INTRACELLULAR_TRANSPORT	MSigDB_C5	11	279	4.66613	2.13055	3.94265	1	2.97289	0.00766696	0.0849269	+*	ADRB2|ANP32A|AP3B1|BCL2|BCL3|COPB2|ERP29|KIF13B|LMAN1|SCAMP2|TLK1
AMUNDSON_GENOTOXIC_SIGNATURE	MSigDB_C2	6	103	1.72441	1.29839	5.82524	1	3.29299	0.00774242	0.0855191	+*	DUSP5|GAB1|HK2|SCAMP2|SP100|TOR1AIP1
Mouse Bone_Boylan07_204genes (17483317-TableS4)	GeneSigDB	7	135	2.25728	1.48597	5.18519	1	3.19166	0.00774135	0.0855191	++	CD69|EHHADH|MARCKS|RAB30|RDX|ST3GAL5|VOPP1|EXCLUDED_GENES:|CCND2
Human Breast_Waddell08_200genes_BRCA1missense (18497862-TableS2)	GeneSigDB	7	135	2.25713	1.48665	5.18519	1	3.19031	0.00774135	0.0855191	+*	ASPHD2|BSPRY|C19ORF10|CCR10|IVNS1ABP|MAP3K5|TCTN3
SENGUPTA_EBNA1_ANTICORRELATED	MSigDB_C2	8	169	2.82516	1.66193	4.73373	1	3.11376	0.00775878	0.0855471	+*	ANXA11|BBIP1|C1ORF186|FGD2|LIMD1|PARP15|PLK3|SP100|EXCLUDED_GENES:|PTPN1
CHIANG_LIVER_CANCER_SUBCLASS_CTNNB1_DN	MSigDB_C2	8	169	2.82877	1.66188	4.73373	1	3.11168	0.00775878	0.0855471	**/++	CSDA|DUSP5|GPR183|MAP3K5|PLBD1|TNFAIP8|UGCG|XK
GNF2_PTPN6	MSigDB_C4	4	47	0.784408	0.877145	8.51064	1	3.66598	0.00780435	0.0856678	+*	ANXA11|LYN|RAC2|SP110
Notch_T-ALL_Palomero_UP	SignatureDB	4	47	0.785841	0.877688	8.51064	1	3.66208	0.00780435	0.0856678	+*/**	CSDA|PMM2|SRPRB|UMPS
GNF2_SELL	MSigDB_C4	4	47	0.786433	0.878297	8.51064	1	3.65886	0.00780435	0.0856678	+*	CNPY3|GMFG|LYN|PAK2
WINTER_HYPOXIA_DN	MSigDB_C2	4	47	0.785565	0.878575	8.51064	1	3.65869	0.00780435	0.0856678	**/++	BCL2|CELF2|IKZF1|KIAA0226L|EXCLUDED_GENES:|IL16
Human Prostate_Shepherd08_50genes_2 (18398820-table2)	GeneSigDB	4	47	0.786309	0.880496	8.51064	1	3.64986	0.00780435	0.0856678	+*	ATP1B3|LMAN1|SLC38A2|TFRC
LEE_LIVER_CANCER_DENA_DN	MSigDB_C2	5	74	1.23838	1.10147	6.75676	1	3.41509	0.00800899	0.0878362	**/+*	ACSM3|EHHADH|GCDH|NETO2|SLC27A5
Human Brain_Dilley05_144genes (15691381-Table5)	GeneSigDB	7	136	2.27283	1.49034	5.14706	1	3.17188	0.00804759	0.08787	+*	CD44|CD47|GAB2|IKZF1|LILRB2|PDCD11|PLAGL1
Human Lung_not_cancer_Golpon04_150genes_NMLvsADLvsEML (15284076-TableE1)	GeneSigDB	7	136	2.27335	1.49049	5.14706	1	3.1712	0.00804759	0.08787	+*	ANP32A|EBNA1BP2|GCDH|NDUFV2|PTPRJ|TCF4|UMPS
LIU_SOX4_TARGETS_UP	MSigDB_C2	7	136	2.27433	1.49256	5.14706	1	3.16616	0.00804759	0.08787	++/*+	BMPR2|BPGM|DUSP5|SLC33A1|STAM|TLE1|TMEM184B|EXCLUDED_GENES:|FUT8
GCM_MAP4K4	MSigDB_C4	8	170	2.84234	1.66639	4.70588	1	3.09511	0.00802686	0.08787	++	ARNT2|BMPR2|GAB2|RDX|SIK3|ULK2|USP46|ZNF275
Human Breast_Harvell08_428genes (18338247-SuppTable4B)	GeneSigDB	12	320	5.34625	2.27625	3.75	1	2.92312	0.00803413	0.08787	++	B9D1|BTLA|CCR10|CLINT1|ELOVL7|LPCAT4|NFKBIZ|PLAGL1|SH2D3C|TESC|TGFBR2|TLE4|EXCLUDED_GENES:|CCND2
BHAT_ESR1_TARGETS_VIA_AKT1_UP	MSigDB_C2	11	281	4.6987	2.13867	3.91459	1	2.94637	0.0080665	0.0879988	++/+*	B4GALT1|C10ORF2|FAIM3|FAM46C|GAB2|HCK|HK2|HPDL|MAT2A|NOLC1|PMM2
Human HeadandNeck_Sok03_31genes (12874079-Table3d)	GeneSigDB	3	25	0.416902	0.639612	12	1	4.03854	0.00812914	0.0880609	+*	BATF|PLAGL1|TMEM184B
XU_CREBBP_TARGETS_UP	MSigDB_C2	3	25	0.417929	0.640418	12	1	4.03185	0.00812914	0.0880609	+*/+*	ALG3|GNL3|MCM2
Human Immune_Horwitz04_40genes (15583081-Table2)	GeneSigDB	3	25	0.418044	0.640432	12	1	4.03158	0.00812914	0.0880609	+*	AKIRIN1|CFLAR|LILRA6
Human Lymphoma_MontesMoreno08_31genes (17898315-Table1)	GeneSigDB	3	25	0.418223	0.640908	12	1	4.02831	0.00812914	0.0880609	+*	AICDA|SPIB|USP46
INTERLEUKIN_BINDING	MSigDB_C5	3	25	0.417883	0.641162	12	1	4.02724	0.00812914	0.0880609	+*	IL10RA|IL12A|IL2RA
CHEOK_RESPONSE_TO_MERCAPTOPURINE_AND_HD_MTX_DN	MSigDB_C2	3	25	0.418367	0.641622	12	1	4.02361	0.00812914	0.0880609	**/+*	SACS|SMCHD1|TGFBR2
KLF2_induced	SignatureDB	6	104	1.74133	1.30461	5.76923	1	3.26431	0.00810379	0.0880609	+*	CASP10|CD47|IL10RA|PRKCB|S1PR1|SP100|EXCLUDED_GENES:|CCND2|SH3BP5
V$PTF1BETA_Q6	MSigDB_C3	10	243	4.06661	1.99132	4.11523	1	2.97963	0.00810351	0.0880609	+*	AFF3|ATP1B3|BCL2|CHD2|CSNK1E|DNMT3A|EIF4G1|PIAS2|PTPN2|SMARCA2|EXCLUDED_GENES:|ETV6
CELL_DEVELOPMENT	MSigDB_C5	18	572	9.57083	3.03389	3.14685	1	2.77833	0.0082118	0.0888786	+*	AVEN|BCL2|BCL2L10|BCL3|C16ORF5|CASP10|CFLAR|ERN1|FAIM3|GCLC|GLO1|HSP90B1|IL12A|IL2RA|MAP3K5|PARP4|PLAGL1|TNFAIP8|EXCLUDED_GENES:|BLNK|BMF|PIM1
Human Breast_Creighton08_584genes (18757322-TableS3)	GeneSigDB	16	486	8.1327	2.80003	3.29218	1	2.80972	0.00824267	0.0891347	++	BCL2|COL9A3|CTR9|EHHADH|HEATR6|HIST1H1C|HIST1H2AC|IGSF3|PDCD4|PHF16|PION|PTPN2|RAB7L1|SP100|SP110|ULK2|EXCLUDED_GENES:|BLNK|SH3BP5
KEGG_INTESTINAL_IMMUNE_NETWORK_FOR_IGA_PRODUCTION	MSigDB_C2	4	48	0.801984	0.886524	8.33333	1	3.60737	0.00840374	0.0901671	+*	AICDA|CCR10|IL10|TNFRSF13B
Human Bone Marrow_Zhan03_50genes_lateDiff (12393520-Table3)	GeneSigDB	4	48	0.80284	0.886898	8.33333	1	3.60488	0.00840374	0.0901671	++	BCL2|DUSP5|GPR183|XK
Human Leukemia_Dijkman07_63genes (17068154-Table3)	GeneSigDB	4	48	0.80164	0.887575	8.33333	1	3.60348	0.00840374	0.0901671	+*	FAIM3|MNDA|SPIB|UGCG|EXCLUDED_GENES:|BLNK
DAUER_STAT3_TARGETS_UP	MSigDB_C2	4	48	0.801571	0.887644	8.33333	1	3.60328	0.00840374	0.0901671	+*/**	BCL3|DUSP5|STAT3|UGCG
Human Colon_Grade06_58genes (16397240-Table1e)	GeneSigDB	4	48	0.803403	0.8876	8.33333	1	3.60139	0.00840374	0.0901671	+*	BCL2|CD44|TGFBR2|TYMS
Human Breast_Winter07_67genes (17409455-TableS3)	GeneSigDB	4	48	0.803962	0.887924	8.33333	1	3.59945	0.00840374	0.0901671	+*	BCL2|CELF2|IKZF1|KIAA0226L|EXCLUDED_GENES:|IL16
Human Breast_Yu07_298genes (17894856-SuppList4)	GeneSigDB	9	207	3.4609	1.83528	4.34783	1	3.01813	0.00835836	0.0901671	++	ATP13A3|IVNS1ABP|MAPKAPK2|NOLC1|PAK2|PDE4B|SMARCA2|SMARCC1|TCF4|EXCLUDED_GENES:|PTPN1
CHANG_CORE_SERUM_RESPONSE_DN	MSigDB_C2	9	207	3.46253	1.83529	4.34783	1	3.01722	0.00835836	0.0901671	**/++	ANKRD12|ANXA11|ARHGEF3|CNTNAP1|MAN1A1|NOSIP|SFTPB|SNX18|TNFAIP8
Mouse Skin_Driskell09_1322genes (19605494-TableS1)	GeneSigDB	23	797	13.3244	3.56286	2.88582	1	2.71569	0.00837697	0.0901671	++	ACPP|ARHGAP24|CD200|CD37|CHST2|DOCK10|ELOVL7|EPHB1|HCK|IKZF1|IL10RA|LBH|MAP3K5|MCM2|MINA|NETO2|PHACTR1|PLAC8|PLBD1|PRKCB|SLA|TNFAIP8|TOX2|EXCLUDED_GENES:|CCND2|IRF4
Human Leukemia_Alcalay05_369genes (15831697-TableS2)	GeneSigDB	12	322	5.38679	2.28727	3.72671	1	2.89131	0.00841826	0.0902446	++	CD200|CD69|COCH|GPX7|MAN1A1|MCM2|MTHFD1|NGLY1|PLAGL1|SIDT1|TESC|TYMS
MODULE_331	MSigDB_C4	5	75	1.25322	1.1079	6.66667	1	3.38188	0.0084662	0.0906015	+*	GABPB1|HEATR6|NOLC1|SLC43A3|SRPRB
PEDERSEN_TARGETS_OF_611CTF_ISOFORM_OF_ERBB2	MSigDB_C2	5	75	1.25368	1.10818	6.66667	1	3.38062	0.0084662	0.0906015	+*	CD44|HK2|NABP1|TNFAIP8|UBE2E3
Human Breast_Sotiriou03_137genes_Grade (12917485-Table7)	GeneSigDB	6	105	1.75691	1.31114	5.71429	1	3.23619	0.00847714	0.0906402	+*	CFLAR|COL9A3|MCM2|OAS1|UCK2|ZMYND11
MOREAUX_MULTIPLE_MYELOMA_BY_TACI_DN	MSigDB_C2	8	172	2.87586	1.67463	4.65116	1	3.05987	0.00858381	0.0917015	*+/+*	EBNA1BP2|MCM2|MINA|SLC33A1|THYN1|TLE4|TSHZ1|TYMS
REGULATION_OF_MOLECULAR_FUNCTION	MSigDB_C5	12	323	5.40383	2.29	3.71517	1	2.88043	0.00861563	0.091962	+*	ADRB2|BCL2|BCL2L10|BCL3|CARD11|ERN1|FGD2|MAP3K5|NOSIP|PAK1|PAK2|PDCD4|EXCLUDED_GENES:|CCND2
Human Prostate_Bjorkman08_209genes (18798265-tableS2)	GeneSigDB	7	138	2.3088	1.50093	5.07246	1	3.12553	0.00868671	0.0926408	+*	ADRB2|ANP32A|ATP1B3|CSDA|HIST1H1C|HIST1H2AC|LIMD1
Human Breast_Wirapati08_288genes_ESR1_Module (18662380-S3-ESR1)	GeneSigDB	11	284	4.74978	2.14731	3.87324	1	2.91072	0.00869593	0.0926593	++	AFF3|BCL2|C5ORF30|CREB3L2|CSDA|ECI1|LYN|PLAGL1|SLC19A2|UBE2E3|UGCG|EXCLUDED_GENES:|FUT8
Human Breast_Kreike07_3712genes_Basal_mets (17910759-TableS5)	GeneSigDB	57	2484	41.5433	6.06113	2.29469	1	2.55014	0.00879057	0.093587	++	ABCE1|ANXA11|AP3B1|B4GALT1|BSPRY|C16ORF5|CD200|CD44|CD47|CDYL|CLINT1|COCH|COL9A3|DNMT3A|DOCK10|ELOVL7|EML4|FASTKD1|FNDC3A|GNL3|GNPTAB|GPR183|HOOK1|IQGAP2|IVNS1ABP|LBH|MARCKS|MEX3C|MOCOS|MSRB1|NETO2|P2RX5|PARP4|PDLIM1|PEBP1|PHACTR2|PLEKHG1|PNP|PPIB|PTPLA|PTPN2|RAB7L1|RDX|SACS|SLC33A1|SLC38A2|SLC43A3|SMCHD1|SP110|ST6GALNAC4|TBL1XR1|TCF4|TLE4|TMEM184B|TOMM70A|UGCG|ZBTB11|EXCLUDED_GENES:|ENTPD1|FOXP1…
Rat Breast_Moral07_163genes_BBP_treated (18062813-GeneList)	GeneSigDB	6	106	1.77054	1.31589	5.66038	1	3.21415	0.00886266	0.0940365	+*	AP3M2|CD44|CELF2|GAB2|PCYT1A|TCF4
ICHIBA_GRAFT_VERSUS_HOST_DISEASE_D7_UP	MSigDB_C2	6	106	1.77344	1.31819	5.66038	1	3.20633	0.00886266	0.0940365	+*/**	FKBP11|HCK|LITAF|MPEG1|NFKBIZ|PLAC8|EXCLUDED_GENES:|PTPN1
WANG_TUMOR_INVASIVENESS_DN	MSigDB_C2	9	209	3.49504	1.84563	4.30622	1	2.98269	0.00887079	0.0940365	+*/+*	B4GALT1|CD44|CELF2|CNBP|ECI1|IVNS1ABP|LITAF|SEC61A1|WDFY1|EXCLUDED_GENES:|IL16
Human Breast_Kim04_283genes (14768006-SuppTable5)	GeneSigDB	9	209	3.49376	1.84697	4.30622	1	2.98123	0.00887079	0.0940365	++	EBNA1BP2|EIF4G1|GTF3A|IQGAP2|MAN1A1|MRPL3|PCK2|SEC61B|TUBB4A
V$OCT1_02	MSigDB_C3	9	209	3.49528	1.84714	4.30622	1	2.98013	0.00887079	0.0940365	++	AFF3|CACNA1D|CHML|PTPRJ|SMARCA2|TCF4|TET2|TGIF1|ZBTB32|EXCLUDED_GENES:|ENTPD1|FOXP1|FUT8
STK33_NOMO_DN	MSigDB_C6	11	285	4.76062	2.15168	3.85965	1	2.89977	0.00891398	0.0942521	+*/+*	ACPP|AFF3|BCL2|BSPRY|BTLA|C7ORF23|CCR10|CCR7|CHML|GPM6A|HPDL
ACEVEDO_FGFR1_TARGETS_IN_PROSTATE_CANCER_MODEL_UP	MSigDB_C2	11	285	4.76582	2.15237	3.85965	1	2.89643	0.00891398	0.0942521	+*/**	BCL3|CD44|HK2|IGHM|IKZF1|MLKL|NABP1|OAS1|PLCL2|TESC|TFRC|EXCLUDED_GENES:|FOXP1
TBK1.DF_DN	MSigDB_C6	11	285	4.7673	2.15258	3.85965	1	2.89545	0.00891398	0.0942521	++/++	BMPR2|ELL2|FNBP1L|HIST1H1C|HOOK1|KIF14|LEPREL1|MINA|SMARCA2|UBE2W|USP46|EXCLUDED_GENES:|CCND2
Human Lung_Fontemaggi02_85genes (12213815-Table1)	GeneSigDB	5	76	1.2708	1.11661	6.57895	1	3.33975	0.00894116	0.0944586	++	GAB2|HIVEP1|KLHL21|MTDH|SP110
Human StemCell_Komor05_52genes (15955831-Table7)	GeneSigDB	4	49	0.81815	0.896904	8.16327	1	3.54759	0.00903247	0.0950175	+*	ECI1|FKBP11|PDE4B|SLC38A2
YAO_TEMPORAL_RESPONSE_TO_PROGESTERONE_CLUSTER_8	MSigDB_C2	4	49	0.819894	0.896692	8.16327	1	3.54649	0.00903247	0.0950175	++	AKIRIN1|HK2|MAT2A|TFRC
Mouse Skin_SuryoRahmanto07_50genes (17449903-Table2)	GeneSigDB	4	49	0.819744	0.896928	8.16327	1	3.54572	0.00903247	0.0950175	+*	ARHGAP24|CD44|PDE4B|TCF4|EXCLUDED_GENES:|IL16
Human Viral_Uchimura07_54genes (17970077-Table6)	GeneSigDB	4	49	0.819391	0.897235	8.16327	1	3.5449	0.00903247	0.0950175	++	B4GALT1|MARCKS|PDE4B|PDLIM1|EXCLUDED_GENES:|PTPN1
LINDGREN_BLADDER_CANCER_CLUSTER_2A_DN	MSigDB_C2	7	139	2.32547	1.50634	5.03597	1	3.10323	0.00901989	0.0950175	**/++	C9ORF91|CCDC50|CELF2|IQGAP2|PLAGL1|TOX2|UGCG
ZHENG_FOXP3_TARGETS_UP	MSigDB_C2	3	26	0.435123	0.654162	11.5385	1	3.92086	0.00907711	0.0954061	+*/**	CD44|FAM46C|IL2RA
VERHAAK_GLIOBLASTOMA_NEURAL	MSigDB_C2	9	210	3.51213	1.85227	4.28571	1	2.96278	0.00913577	0.0957834	++	ACPP|BATF|LILRB2|MAN1A1|PLBD1|PLK3|RAC2|TGFBR2|TNFAIP8
NEGATIVE_REGULATION_OF_NUCLEOBASENUCLEOSIDENUCLEOTIDE_AND_NUCLEIC_ACID_METABOLIC_PROCESS	MSigDB_C5	9	210	3.51403	1.85174	4.28571	1	2.96261	0.00913577	0.0957834	+*	BCL3|CSDA|GCLC|PDCD4|STAT3|TGIF1|TLE1|ZBTB32|ZMYND11
KRAS.600.LUNG.BREAST_UP.V1_UP	MSigDB_C6	11	286	4.78505	2.15732	3.84615	1	2.88086	0.00913624	0.0957834	+*/**	ADAM8|ADAMTS6|ARHGAP24|CCL22|CCR10|CD37|CHST2|COL9A3|LAG3|LILRA6|SPIB
Human Lymphoma_Mahadevan05_11genes (16373702-Table3)	GeneSigDB	2	9	0.149919	0.38378	22.2222	1	4.82068	0.00929461	0.0966249	+*	CCL18|RAC2
Human Colon_Ivanov07_10genes (17086209-Table1b)	GeneSigDB	2	9	0.150405	0.384343	22.2222	1	4.81236	0.00929461	0.0966249	+*	MARCKS|TGFBR2
THILLAINADESAN_ZNF217_TARGETS_DN	MSigDB_C2	2	9	0.150479	0.384813	22.2222	1	4.80628	0.00929461	0.0966249	**/+*	MAN1A1|THYN1
Human Viral_Cairo08_14genes (19061838-TableS8)	GeneSigDB	2	9	0.150989	0.385136	22.2222	1	4.80093	0.00929461	0.0966249	+*	MCM2|SLC27A5
SA_FAS_SIGNALING	MSigDB_C2	2	9	0.150861	0.385342	22.2222	1	4.7987	0.00929461	0.0966249	+*	BCL2|CFLAR
Human Leukemia_Bal05_10genes (15896717-Table3)	GeneSigDB	2	9	0.150828	0.385387	22.2222	1	4.79822	0.00929461	0.0966249	+*	BCL2|CFLAR
Human pancreas_Rogers06_10genes_U133A-arrays (17012836-Table3)	GeneSigDB	2	9	0.150961	0.385505	22.2222	1	4.79641	0.00929461	0.0966249	+*	CCL18|LILRB2
Mouse DendriticCells_Bar-On10_9genes (20679228-TableS6)	GeneSigDB	2	9	0.151419	0.385603	22.2222	1	4.794	0.00929461	0.0966249	+*	ADAM8|CCR7
Human Lymphoma_Staub09_113genes (19399471-SuppTable2)	GeneSigDB	6	107	1.79273	1.32505	5.60748	1	3.17517	0.00926057	0.0966249	+*	AVEN|CASP10|MINA|NOLC1|PECR|UBE2E3
TTGCCAA,MIR-182	MSigDB_C3	12	326	5.4517	2.29693	3.68098	1	2.85089	0.00922951	0.0966249	++	ARHGEF3|ATP1B3|BCL2|CD47|CNPY3|CSNK1E|ELL2|EPHB1|FNBP1L|IGSF3|MARCKS|RDX
CATTTCA,MIR-203	MSigDB_C3	11	287	4.80289	2.16185	3.83275	1	2.86658	0.00936276	0.0972517	++	ABCE1|ADAMTS6|AKIRIN1|C5ORF30|CHST7|DUSP5|ELL2|MEX3C|PRKCB|TSHZ1|ZMYND11
THEILGAARD_NEUTROPHIL_AT_SKIN_WOUND_UP	MSigDB_C2	5	77	1.28783	1.12395	6.49351	1	3.30279	0.0094342	0.0978294	+*/**	CD44|CFLAR|CHD1|HIVEP1|OXSR1
HESS_TARGETS_OF_HOXA9_AND_MEIS1_DN	MSigDB_C2	5	77	1.28712	1.12438	6.49351	1	3.30215	0.0094342	0.0978294	**/+*	EHD1|HCK|HIST1H1C|LITAF|MPEG1
V$CDC5_01	MSigDB_C3	10	249	4.16529	2.01624	4.01606	1	2.89386	0.00952414	0.0986794	++	ADAMTS6|AICDA|BMPR2|CHD2|KLF8|LYN|SMARCA2|STAT3|TGIF1|TLE1|EXCLUDED_GENES:|FOXP1
Human Breast_Troester06_64genes_sham-ME16C (17150101-TableS1e)	GeneSigDB	4	50	0.835908	0.905234	8	1	3.49533	0.00969108	0.0999903	+*	DUSP5|GCLC|PLK3|UGCG
ZHANG_TLX_TARGETS_DN	MSigDB_C2	6	108	1.80522	1.32897	5.55556	1	3.15642	0.00967108	0.0999903	**/+*	AEN|HIST1H1C|PARP3|SLC19A2|SP110|TGFBR2
Mouse Lung_Beisiegel09_262genes (19795415-Table1)	GeneSigDB	9	212	3.54245	1.85722	4.24528	1	2.93856	0.00968366	0.0999903	+-	ADAM8|BCL3|CD47|CFLAR|IL12A|LAG3|LITAF|STAT3|TGIF1|EXCLUDED_GENES:|IL16
ATATGCA,MIR-448	MSigDB_C3	9	212	3.54312	1.85908	4.24528	1	2.93526	0.00968366	0.0999903	++	BCL2|C6ORF106|ELL2|GPM6A|MTDH|RAVER2|TOR1AIP1|UBE2W|VASH2
MODULE_63	MSigDB_C4	9	212	3.54785	1.86077	4.24528	1	2.93005	0.00968366	0.0999903	+*	ADRB2|CNTNAP1|EPHB1|IL10RA|IL2RA|LILRA2|LILRA3|LILRB2|TNFRSF13B
V$AREB6_04	MSigDB_C3	10	250	4.18167	2.01843	4	1	2.8826	0.00977832	0.100639	++	EIF4G1|HIST1H1C|KIAA0226L|LAG3|PDCD4|RASGRF1|SMARCA2|TCF4|TGIF1|ZADH2|EXCLUDED_GENES:|BMF|FUT8
V$OCT1_05	MSigDB_C3	10	250	4.18397	2.01931	4	1	2.88021	0.00977832	0.100639	++	BCL2|DCAF17|GPM6A|HIST1H2AC|LYN|MANF|METTL8|PIM2|PRKCB|PTPN2|EXCLUDED_GENES:|PIM1
Human Breast_Yu07_400genes (17894856-SuppList2)	GeneSigDB	10	250	4.18267	2.02062	4	1	2.87898	0.00977832	0.100639	+*	CCR7|ERP29|HCK|LYN|MAP3K5|PDCD4|PRKCB|STAM|STAT3|TGFBR2
BOSCO_INTERFERON_INDUCED_ANTIVIRAL_MODULE	MSigDB_C2	5	78	1.3026	1.12936	6.41026	1	3.27388	0.00994563	0.102106	+*	KPTN|PTPN2|SLAMF7|ST3GAL5|TRAFD1
RHEIN_ALL_GLUCOCORTICOID_THERAPY_UP	MSigDB_C2	5	78	1.30469	1.13078	6.41026	1	3.26794	0.00994563	0.102106	++/+*	DUSP5|GPR183|MNDA|P2RX5|P2RY10
LINDVALL_IMMORTALIZED_BY_TERT_UP	MSigDB_C2	5	78	1.30531	1.13063	6.41026	1	3.26781	0.00994563	0.102106	++/*+	ANXA11|FKBP11|RILPL2|SLC38A2|TSHZ1
Human HeadandNeck_Jarvinen06_223genes (16715129-SuppTable5)	GeneSigDB	9	213	3.56073	1.86689	4.22535	1	2.91355	0.00996673	0.102237	++	CHST7|DCTD|LPCAT4|PDE4B|PEBP1|SLC25A30|SLC38A2|TNFAIP8|UBE2E3
IVANOVA_HEMATOPOIESIS_STEM_CELL_AND_PROGENITOR	MSigDB_C2	20	673	11.2605	3.27993	2.97177	1	2.66454	0.0100002	0.102496	++	AVEN|BCL2|ERP29|FKBP11|FNBP1L|FZD6|GMPPB|IPO4|IVNS1ABP|NFKBIZ|PDCD4|PIM2|POLR3G|RNF138|SLC33A1|SMARCC1|TGIF1|TLE4|UMPS|ZNF275|EXCLUDED_GENES:|CCND2|ETV6|FUT8
BOYAULT_LIVER_CANCER_SUBCLASS_G5_DN	MSigDB_C2	3	27	0.450546	0.665107	11.1111	1	3.83315	0.010087	0.102789	+*	BCL3|CELF2|IL10RA
Mouse StemCell_Biswas06_31genes (16269622-Table2)	GeneSigDB	3	27	0.450628	0.665222	11.1111	1	3.83236	0.010087	0.102789	+*	IL10|NFKBIB|STAT3
PID_GLYPICAN_1PATHWAY	MSigDB_C2	3	27	0.452554	0.665223	11.1111	1	3.82946	0.010087	0.102789	+*	HCK|LYN|TGFBR2
MODULE_219	MSigDB_C4	3	27	0.451364	0.665807	11.1111	1	3.82789	0.010087	0.102789	+*	MTHFD1|TYMS|UMPS
Human Uterine_Wong05_28genes (16353136-Table4)	GeneSigDB	3	27	0.451572	0.666399	11.1111	1	3.82418	0.010087	0.102789	+*	MCM2|PDCD4|TYMS
Human Colon_Sasaki08_27genes (18307535-Table5)	GeneSigDB	3	27	0.452761	0.667668	11.1111	1	3.81513	0.010087	0.102789	+*	COCH|P2RX5|PHF16
RUIZ_TNC_TARGETS_DN	MSigDB_C2	7	142	2.37469	1.52287	4.92958	1	3.03724	0.0100756	0.102789	*+/+*	CCDC86|CD44|LEPREL1|MCM2|PNP|TYMS|UGCG
FARMER_BREAST_CANCER_APOCRINE_VS_BASAL	MSigDB_C2	12	330	5.52125	2.3152	3.63636	1	2.79836	0.0101004	0.102841	++	ENOSF1|GPX7|KIF14|LYN|PDLIM1|PLAGL1|PLCL2|RNF138|SIDT1|SLC19A2|TYMS|UBE2E3
Human Leukemia_San Jose-Eneriz08_772genes (18537972-TableS3)	GeneSigDB	20	674	11.2711	3.28385	2.96736	1	2.65812	0.010152	0.103282	++	ARHGAP24|C6ORF106|CYB5B|GAB2|GCDH|KIAA0226L|LEPREL1|LPIN2|MINA|NIPA2|OAS1|POLR3G|PTPRJ|RASGRF1|SCAPER|SELRC1|SFTPB|SIK3|ST6GALNAC4|TUBB4A|EXCLUDED_GENES:|IL16
Human StemCell_Dekker06_600genes (16455954-TableS1)	GeneSigDB	17	541	9.04766	2.95074	3.14233	1	2.69503	0.0101728	0.103408	++	ADAM8|ARHGEF3|BCL3|C6ORF106|CCL22|CD47|CNBP|CSDA|DUSP5|IQGAP2|PHTF1|PKN3|PLBD1|PTPRJ|SP100|ST3GAL5|ZFAT|EXCLUDED_GENES:|ENTPD1|FOXP1
V$MYCMAX_03	MSigDB_C3	10	252	4.21727	2.02571	3.96825	1	2.85466	0.0103022	0.104637	+*	DNMT3A|EIF4G1|FKBP11|MANF|MAT2A|MCM2|PLAGL1|RAB30|SLC38A2|SLC38A5
Mouse Viral_Cairo08_620genes (19061838-TableS13)	GeneSigDB	12	331	5.5356	2.31683	3.62538	1	2.79018	0.0103277	0.104811	++	FKBP11|GCDH|GRWD1|KIF13B|NGLY1|PCK2|PECR|PLAC8|RNF138|SLC27A5|SMARCA2|TGIF1
BURTON_ADIPOGENESIS_7	MSigDB_C2	4	51	0.852219	0.914192	7.84314	1	3.44324	0.0103801	0.104826	++	CD44|CD47|PLAC8|PNP
Human StemCell_Komor05_58genes (15955831-SuppTable2)	GeneSigDB	4	51	0.852317	0.91439	7.84314	1	3.44238	0.0103801	0.104826	+*	EHHADH|FKBP11|MINA|PHF16
LEE_TARGETS_OF_PTCH1_AND_SUFU_DN	MSigDB_C2	4	51	0.852958	0.914419	7.84314	1	3.44158	0.0103801	0.104826	**/+*	CSDA|HK2|IER5|MCM2|EXCLUDED_GENES:|CCND2
LEE_CALORIE_RESTRICTION_MUSCLE_DN	MSigDB_C2	4	51	0.853787	0.915465	7.84314	1	3.43674	0.0103801	0.104826	**/+*	IGHM|ITGAE|MAPKAPK2|PEBP1
BOYAULT_LIVER_CANCER_SUBCLASS_G123_DN	MSigDB_C2	4	51	0.854722	0.915322	7.84314	1	3.43625	0.0103801	0.104826	**/+*	GCDH|MTHFD1|PCK2|SLC27A5
DAIRKEE_CANCER_PRONE_RESPONSE_BPA	MSigDB_C2	4	51	0.854212	0.916131	7.84314	1	3.43377	0.0103801	0.104826	+*	GTF3A|MTHFD1|RDX|UCK2
TRANSCRIPTION_FROM_RNA_POLYMERASE_II_PROMOTER	MSigDB_C5	15	456	7.62564	2.71271	3.28947	1	2.71845	0.0104053	0.104995	+*	CHD1|CHD2|CSDA|ELL2|LITAF|PLAGL1|SMARCA2|SMARCC1|SPIB|STAT3|SUB1|TCEB3|TGIF1|ZBTB32|ZMYND11
Human Lung_Dauer05_150genes (15735721-SuppTable1b)	GeneSigDB	7	143	2.3904	1.52963	4.8951	1	3.01353	0.0104468	0.105328	+*	CYB5B|GCLC|IQGAP2|OAS1|SLC33A1|SP100|SP110
GNF2_STAT6	MSigDB_C4	5	79	1.32218	1.13776	6.32911	1	3.23249	0.0104758	0.105448	+*	ADPGK|ANXA11|LYN|PAK2|RAC2
MCCLUNG_COCAINE_REWARD_5D	MSigDB_C2	5	79	1.3202	1.13847	6.32911	1	3.23223	0.0104758	0.105448	++	CD47|CELF2|PDE4B|SMARCA2|TUBB4A
GHANDHI_DIRECT_IRRADIATION_UP	MSigDB_C2	6	110	1.83883	1.3411	5.45455	1	3.10281	0.0105307	0.105829	+*/**	AEN|IL12A|NFKBIZ|PLCL2|PLK3|TESC
BRUECKNER_TARGETS_OF_MIRLET7A3_UP	MSigDB_C2	6	110	1.84088	1.34227	5.45455	1	3.09858	0.0105307	0.105829	++/*+	ANXA11|ATP1B3|DUSP5|PHACTR2|SLC38A2|TESC|EXCLUDED_GENES:|SH3BP5
Mouse Lung_Moulos09_925genes (20003503-SuppTable1)	GeneSigDB	20	677	11.3207	3.293	2.95421	1	2.63569	0.0106185	0.106625	+*	ACPP|ALG3|ANP32A|CDK12|CHD1|CSDA|FKBP11|GTF3A|LEPREL1|MAP3K5|MAT2A|MRPL3|PION|PTPLA|PTPN2|RDX|SMCHD1|SRPRB|TM2D3|TYMS
Human Breast_Barry10_205genes (20368555-TS-2)	GeneSigDB	8	179	2.99371	1.70938	4.46927	1	2.92872	0.0107626	0.107896	+*	AICDA|ANKRD12|BCL2|FA2H|SIK3|SMARCA2|TUBB4A|UCK2
GCNP_SHH_UP_LATE.V1_DN	MSigDB_C6	8	179	2.99719	1.71095	4.46927	1	2.924	0.0107626	0.107896	**/+*	ADRB2|ARID3A|GNPTAB|IKZF1|ITGAE|MRPL3|PTPRJ|S1PR1
ENDOPLASMIC_RETICULUM	MSigDB_C5	11	293	4.89784	2.17908	3.75427	1	2.80034	0.0108143	0.108064	+*	ALG3|ANP32A|ERN1|ERP29|HSP90B1|LMAN1|MAN1A1|PPIB|SEC61B|SLC27A5|SLC33A1
WANG_TUMOR_INVASIVENESS_UP	MSigDB_C2	13	374	6.25767	2.46014	3.47594	1	2.74063	0.01081	0.108064	+*/+*	ABCE1|EHD1|EIF4G1|GTF3A|HSP90B1|MARCKS|PAK1|PLAC8|PNP|POLR1C|RDX|SEC61B|SUB1
KIM_WT1_TARGETS_DN	MSigDB_C2	15	458	7.65848	2.71702	3.27511	1	2.70205	0.010797	0.108064	++/++	ANKRD12|CTR9|DLEU1|FASTKD1|KIF14|MANF|PLAGL1|RAB7L1|SLC33A1|SLC38A2|STAM|TGIF1|TM2D3|TNFAIP8|TRAM2
CHARAFE_BREAST_CANCER_LUMINAL_VS_MESENCHYMAL_DN	MSigDB_C2	15	458	7.65847	2.71882	3.27511	1	2.70026	0.010797	0.108064	++/++	CCDC50|CD44|CHST2|DOCK10|LBH|LEPREL1|LYN|PTPLA|SACS|SOGA2|STAMBPL1|TGFBR2|TOX2|TRAM2|TYMS|EXCLUDED_GENES:|PIM1
Human Lung_Hou10_187genes (20421987-TableS2)	GeneSigDB	7	144	2.40943	1.536	4.86111	1	2.98866	0.0108278	0.108112	++	ADRB2|CELF2|GPM6A|MYOCD|RASGRF1|S1PR1|SH2D3C
V$AP4_Q6_01	MSigDB_C3	10	254	4.24864	2.03415	3.93701	1	2.82741	0.0108471	0.108218	+*	AICDA|DCAF17|HIST1H2BB|HOOK1|METTL8|NOSIP|PRKCB|TGIF1|TRIT1|TUBB4A|EXCLUDED_GENES:|CCND2
TRANSFERASE_ACTIVITY_TRANSFERRING_GLYCOSYL_GROUPS	MSigDB_C5	6	111	1.85713	1.34714	5.40541	1	3.0753	0.0109802	0.109457	++	ALG3|B4GALT1|PNP|ST3GAL5|UGCG|UMPS|EXCLUDED_GENES:|FUT8
PID_KITPATHWAY	MSigDB_C2	4	52	0.869745	0.922984	7.69231	1	3.39145	0.0111001	0.10968	++	BCL2|GAB1|LYN|STAT3
Mouse Lung_not_cancer_Kahnert06_70genes (16479545-Table2)	GeneSigDB	4	52	0.870169	0.923276	7.69231	1	3.38992	0.0111001	0.10968	+*	CCL22|CD44|IL10|TFRC
CAGTCAC,MIR-134	MSigDB_C3	4	52	0.870202	0.923769	7.69231	1	3.38807	0.0111001	0.10968	+*	AFF3|CELF2|MAT2A|SOGA2
TONKS_TARGETS_OF_RUNX1_RUNX1T1_FUSION_MONOCYTE_DN	MSigDB_C2	4	52	0.869361	0.92416	7.69231	1	3.38755	0.0111001	0.10968	*+/+*	ADAM8|IVNS1ABP|SMARCA2|UGCG|EXCLUDED_GENES:|ENTPD1|IRF4
PROTEIN_TYROSINE_PHOSPHATASE_ACTIVITY	MSigDB_C5	4	52	0.870373	0.924407	7.69231	1	3.38555	0.0111001	0.10968	+*	DUSP5|PTPLA|PTPN2|PTPRJ|EXCLUDED_GENES:|PTPN1
Human Lymphoma_Miyazaki09_87genes (18955564-TableS2b)	GeneSigDB	4	52	0.871096	0.924452	7.69231	1	3.38461	0.0111001	0.10968	+*	CCL18|CD200|TOX2|ZBTB32
GNF2_CD33	MSigDB_C4	4	52	0.871147	0.924506	7.69231	1	3.38435	0.0111001	0.10968	+*	LILRA3|LILRA6|LILRB2|PLBD1
Human Uterine_Luo05_89genes (15604209-Table1b)	GeneSigDB	5	80	1.33719	1.14396	6.25	1	3.20189	0.0110249	0.10968	+*	COPB2|GAB1|HSP90B1|IQGAP2|TYMS
Human Lymphoma_Jaye07_genes (17573669-SuppTable1)	GeneSigDB	5	80	1.33943	1.14561	6.25	1	3.1953	0.0110249	0.10968	++	C7ORF23|DNMT3A|PAK1|TLE1|TMEM184B|EXCLUDED_GENES:|BLNK
GC_T_helper_up2x_Chtanova	SignatureDB	14	417	6.97588	2.59716	3.35731	1	2.70455	0.0110873	0.10968	++	AFF3|ATP1B3|BTLA|CD200|CD69|FAM46C|HOOK1|NABP1|PHACTR2|PLCL2|PTPN2|TOX2|UGCG|VOPP1|EXCLUDED_GENES:|IL16
Rat Heart_Lara-Pezzi09_1421genes (20559987-TableS1)	GeneSigDB	22	771	12.8976	3.50444	2.85344	1	2.5974	0.0110579	0.10968	++	ALG3|B4GALT1|CD44|CD47|EBNA1BP2|EPM2AIP1|FKBP11|GPX7|LEPROTL1|LITAF|MAN1A1|MSRB1|NABP1|PCYT1A|PDE4B|PDLIM1|PPIB|RAB30|SEC61B|STAT3|TGIF1|WDR6|EXCLUDED_GENES:|FOXP1
Human Esophagus_Hu05_33genes (15805246-Table3)	GeneSigDB	3	28	0.466648	0.677727	10.7143	1	3.73801	0.0111596	0.109916	+*	EPHB1|KIAA0226L|SOGA2
DAVIES_MULTIPLE_MYELOMA_VS_MGUS_DN	MSigDB_C2	3	28	0.468294	0.677738	10.7143	1	3.73552	0.0111596	0.109916	**/++	LITAF|MARCKS|RNASE6
PID_IL8CXCR1_PATHWAY	MSigDB_C2	3	28	0.46808	0.678146	10.7143	1	3.73359	0.0111596	0.109916	+*	HCK|LYN|PRKCB
REACTOME_BIOSYNTHESIS_OF_THE_N_GLYCAN_PRECURSOR_DOLICHOL_LIPID_LINKED_OLIGOSACCHARIDE_LLO_AND_TRANSFER_TO_A_NASCENT_PROTEIN	MSigDB_C2	3	28	0.468591	0.679018	10.7143	1	3.72804	0.0111596	0.109916	+*	ALG3|GMPPB|PMM2
chr1q21	MSigDB_C1	0	265	4.43135	2.07692	0	0	-2.13361	0.0111771	0.110002	-*
Human Liver_Capurso06_990genes (16728581-SuppTable1)	GeneSigDB	26	959	16.0402	3.89921	2.71116	1	2.55431	0.0112431	0.110563	++	AEN|ANXA11|AP3B1|CD37|CD44|CD69|ELOVL7|FZD6|HSP90B1|IVNS1ABP|LILRA2|LILRA6|LPCAT4|MNDA|MPEG1|NFKBIB|NFKBIZ|P2RY10|PHACTR2|PRKCB|RNASE6|SIK3|TNFAIP8|TOR1AIP1|UBA5|XK|EXCLUDED_GENES:|ENTPD1|FOXP1
YATTNATC_UNKNOWN	MSigDB_C3	13	376	6.28938	2.46882	3.45745	1	2.71815	0.0112625	0.110578	+*	ADAMTS6|FNDC3A|KCNA3|MANF|MARCKS|PTPRJ|SLC2A13|SLC43A3|SMARCA2|STAT3|TLE4|TMEM184B|UBE2W|EXCLUDED_GENES:|ETV6
LINDGREN_BLADDER_CANCER_CLUSTER_1_DN	MSigDB_C2	13	376	6.29106	2.4691	3.45745	1	2.71716	0.0112625	0.110578	**/++	BPGM|CHDH|CREB3L2|IL17RB|IL2RA|KIF14|LOC645638|PLAC8|PMM2|SEC13|SLC43A3|TFRC|UCK2|EXCLUDED_GENES:|SH3BP5
Human Breast_Troester06_436genes-up-DOX-ZR75-1 (17150101-TableS1l)	GeneSigDB	12	335	5.60275	2.33443	3.58209	1	2.74039	0.0112771	0.110633	+*	ABHD10|DOCK10|ECI1|IQGAP2|IVNS1ABP|KIF14|MCM2|PHACTR2|PLBD1|SLC38A2|UBE2E3|VOPP1
BIOCARTA_EPHA4_PATHWAY	MSigDB_C2	2	10	0.16697	0.404746	20	1	4.52884	0.0114906	0.111403	+*	EPHB1|LYN
MIPS_H2AX_COMPLEX_II	MSigDB_C2	2	10	0.166979	0.405018	20	1	4.52578	0.0114906	0.111403	+*	CSDA|HIST1H2BB
Human Lymphoma_Germinal07_18genes (19455257-TableS10)	GeneSigDB	2	10	0.167026	0.405054	20	1	4.52526	0.0114906	0.111403	++	BCL2|IGHM|EXCLUDED_GENES:|CCND2|FOXP1|IRF4|SH3BP5
REGULATION_OF_TYROSINE_PHOSPHORYLATION_OF_STAT_PROTEIN	MSigDB_C5	2	10	0.167083	0.405081	20	1	4.52482	0.0114906	0.111403	+*	IL12A|LYN
MODULE_21	MSigDB_C4	2	10	0.167074	0.405101	20	1	4.52462	0.0114906	0.111403	+*	TYMS|UMPS
NIKOLSKY_BREAST_CANCER_17P11_AMPLICON	MSigDB_C2	2	10	0.167259	0.40527	20	1	4.52227	0.0114906	0.111403	+*	B9D1|ULK2
PYRIMIDINE_NUCLEOTIDE_METABOLIC_PROCESS	MSigDB_C5	2	10	0.167386	0.405702	20	1	4.51714	0.0114906	0.111403	+*	DCTD|UMPS
NFkB_Up_OCILy3_only	SignatureDB	2	10	0.167787	0.405745	20	1	4.51568	0.0114906	0.111403	+*	GPR183|LITAF
Human Colon_Koehler04_11genes (15307139-Table2b)	GeneSigDB	2	10	0.167396	0.405922	20	1	4.51467	0.0114906	0.111403	+*	IGHM|SPIB
SENESE_HDAC2_TARGETS_UP	MSigDB_C2	6	112	1.8703	1.35313	5.35714	1	3.05196	0.0114432	0.111403	+*/*+	ADAMTS6|ATP13A3|LMAN1|NFKBIZ|TFRC|TGFBR2|EXCLUDED_GENES:|CCND2
DITTMER_PTHLH_TARGETS_UP	MSigDB_C2	6	112	1.87383	1.35593	5.35714	1	3.04305	0.0114432	0.111403	++/++	ANXA11|CDK12|DUSP5|MARCKS|MSRB1|TYMS
Human Breast_Bae04_202genes_BRCA1_up (15520196-SuppTable3)	GeneSigDB	8	181	3.02528	1.71781	4.41989	1	2.89596	0.0114542	0.111403	++	ABCE1|ADRB2|COCH|DUSP5|ITGAE|LPCAT4|PLAGL1|PNP
V$AREB6_03	MSigDB_C3	10	256	4.27915	2.04104	3.90625	1	2.80291	0.0114137	0.111403	++	DNMT3A|EHD1|FA2H|FAIM3|PIM2|S1PR1|SH2D3C|TOX2|USP46|WDR6|EXCLUDED_GENES:|FUT8
V$CREL_01	MSigDB_C3	10	256	4.28055	2.04153	3.90625	1	2.80155	0.0114137	0.111403	++	BCL3|CD69|EHD1|EIF4G1|ERN1|GPM6A|HIVEP1|IER5|IL2RA|NFKBID
JOHNSTONE_PARVB_TARGETS_3_DN	MSigDB_C2	25	913	15.2731	3.80042	2.73823	1	2.55941	0.0114088	0.111403	++/++	ANKRD12|ATP1B3|BMPR2|CHD2|COCH|CSDA|EBNA1BP2|ELL2|GLO1|ITGAE|IVNS1ABP|MINA|NOSIP|PARL|RNF138|SACS|SMARCA2|SMCHD1|SOGA2|SUB1|TCEB3|TM2D3|TSHZ1|TYMS|U2SURP
RECEPTOR_SIGNALING_PROTEIN_ACTIVITY	MSigDB_C5	5	81	1.35343	1.15137	6.17284	1	3.16716	0.0115934	0.111961	++	LYN|MAP3K5|SP110|STAT3|TGFBR2|EXCLUDED_GENES:|BLNK
Human Leukemia_Andersson05_100genes_AMLVsALL (15843827-TableS5)	GeneSigDB	5	81	1.35404	1.15199	6.17284	1	3.16494	0.0115934	0.111961	+*	C9ORF91|CD44|GAB1|GLO1|LBH
Human StemCell_Manalo05_108genes (15374877-Table2)	GeneSigDB	5	81	1.35481	1.15175	6.17284	1	3.16492	0.0115934	0.111961	+*	MCM2|NOLC1|POLR3G|RRP9|UMPS
RESPONSE_TO_STRESS	MSigDB_C5	16	505	8.44363	2.84886	3.16832	1	2.65242	0.0115775	0.111961	+*	ARNT2|BCL3|C16ORF5|CCL22|CCR7|CHST2|CSDA|CSNK1E|ERN1|GCLC|HSP90B1|LMAN1|OXSR1|PARP3|PARP4|PDLIM1|EXCLUDED_GENES:|BLNK|ENTPD1
GCACTTT,MIR-17-5P,MIR-20A,MIR-106A,MIR-106B,MIR-20B,MIR-519D	MSigDB_C3	18	593	9.91708	3.08897	3.03541	1	2.61671	0.0115808	0.111961	++	ARHGEF3|BMPR2|CD69|FAM46C|FNBP1L|FNDC3A|GAB1|MAP3K5|NABP1|NETO2|RAB30|S1PR1|SACS|STAT3|TGFBR2|TLE4|UBE2W|USP46|EXCLUDED_GENES:|CCND2|SH3BP5
TGTTTGY_V$HNF3_Q6	MSigDB_C3	21	729	12.1974	3.41078	2.88066	1	2.5808	0.0116755	0.112666	++	ACSM3|ADTRP|AFF3|ATXN7L1|C7ORF23|CHN2|ECI1|FAM100B|GAB2|GPM6A|HIST1H1C|IQGAP2|MARCH3|PDCD4|SFTPB|SMARCA2|SPIB|TCF4|TGIF1|TLE4|ZADH2|EXCLUDED_GENES:|BLNK|BMF|FOXP1|IL16
V$SP1_Q4_01	MSigDB_C3	10	257	4.29717	2.04482	3.89105	1	2.78891	0.0117052	0.112865	+*	ANP32A|AP3M2|BMPR2|CACNA1D|CTR9|PTPN2|RAP1GDS1|SH2D3C|SNX18|TCF4|EXCLUDED_GENES:|SH3BP5
AKT_UP_MTOR_DN.V1_UP	MSigDB_C6	8	182	3.04119	1.72069	4.3956	1	2.88188	0.011812	0.11354	+*/++	C6ORF106|GPD2|HCK|PAK1|PLAGL1|PTPRJ|TESC|TGIF1
REACTOME_POST_TRANSLATIONAL_PROTEIN_MODIFICATION	MSigDB_C2	8	182	3.0421	1.72284	4.3956	1	2.87774	0.011812	0.11354	+*	ALG3|B4GALT1|GMPPB|LMAN1|MAN1A1|PMM2|SEC13|ST6GALNAC4|EXCLUDED_GENES:|FUT8
GCAAAAA,MIR-129	MSigDB_C3	8	182	3.04366	1.7246	4.3956	1	2.87392	0.011812	0.11354	++	AP3B1|BMPR2|CELF2|EPHB1|MAN1A1|PRKCB|SP100|TSHZ1
Myc_ChIP_PET_3plus	SignatureDB	15	463	7.74474	2.73074	3.23974	1	2.65688	0.0118272	0.113598	++	AP3B1|B4GALT1|BCL2|CDK12|FA2H|GABPB1|METTL8|PARL|SEC61A1|SMARCA2|ST3GAL5|TOMM70A|TUBB4A|UCK2|ZNF107
MORF_GMPS	MSigDB_C4	4	53	0.884612	0.932486	7.54717	1	3.34095	0.0118514	0.113742	+*	ERP29|MTDH|NDUFV2|TOMM70A
ACOSTA_PROLIFERATION_INDEPENDENT_MYC_TARGETS_DN	MSigDB_C2	6	113	1.88943	1.36008	5.30973	1	3.0223	0.0119197	0.114132	+*/+*	ACSM3|ADAM8|C10ORF2|RAC2|STAT3|TNFAIP8|EXCLUDED_GENES:|IRF4|PIM1
BOYAULT_LIVER_CANCER_SUBCLASS_G1_UP	MSigDB_C2	6	113	1.89119	1.36013	5.30973	1	3.0209	0.0119197	0.114132	++/**	ARHGEF3|ARID3A|CACNA1D|MARCH3|PDCD4|SMARCC1
BOSCO_TH1_CYTOTOXIC_MODULE	MSigDB_C2	6	113	1.89231	1.35981	5.30973	1	3.02079	0.0119197	0.114132	+*	ARNT2|BCL2|IL10|IL2RA|P2RX5|TYMS|EXCLUDED_GENES:|IRF4
NEGATIVE_REGULATION_OF_CELLULAR_METABOLIC_PROCESS	MSigDB_C5	10	258	4.31866	2.0482	3.87597	1	2.77382	0.0120024	0.114835	+*	BCL3|CSDA|GCLC|IL10|PDCD4|STAT3|TGIF1|TLE1|ZBTB32|ZMYND11
GCCNNNWTAAR_UNKNOWN	MSigDB_C3	7	147	2.4589	1.5497	4.7619	1	2.93031	0.0120312	0.115022	+*	COCH|DUSP5|EML4|GYG1|SIK3|TOX2|ZADH2|EXCLUDED_GENES:|ETV6
Human HeadandNeck_Jarvinen06_502genes (16715129-SuppTable4)	GeneSigDB	15	464	7.75922	2.73865	3.23276	1	2.64392	0.0120422	0.115038	++	AP3B1|CELF2|CSDA|ELL2|FECH|GMPPB|MANF|MARCKS|MINA|NT5DC2|PAK1|PHTF1|SLC38A2|SMARCC1|USP46
Human Leukemia_Pellegrini08_2692genes (18801183-SuppTable1)	GeneSigDB	49	2110	35.2904	5.63427	2.32227	1	2.43326	0.0121009	0.11551	++	ABHD10|ACSM3|ADAM8|ADPRH|ARHGAP24|B4GALT1|BATF|BCL3|C5ORF45|CCR7|CD37|CD44|CD69|CDKL1|CFLAR|CHST2|COL9A3|DNMT3A|DUSP5|FAIM3|FECH|FZD6|GPR183|HCK|HIST1H1C|HIST1H2BB|IER5|IL10RA|KCNA3|KIF14|LILRA6|P2RY10|PDE4B|PHACTR2|PLAC8|PTPLA|RAB7L1|RAP1GDS1|RAVER2|SH2D3C|SLAMF7|SLC38A2|SP140|TGFBR2|UBE2W|ULK2|VASH2|ZNF101|ZSCAN2|EXCLUDED_GENES:|CCND2
V$SRF_Q4	MSigDB_C3	9	220	3.6825	1.89381	4.09091	1	2.80784	0.0121262	0.115661	++	CHD2|CSDA|DUSP5|EML4|GAB2|MAPKAPK2|RAB30|TGIF1|XK|EXCLUDED_GENES:|FOXP1
Stromal-1_DLBCL_survival_predictor	SignatureDB	0	260	4.34932	2.05606	0	0	-2.11537	0.0121717	0.116006	-+
PUIFFE_INVASION_INHIBITED_BY_ASCITES_UP	MSigDB_C2	5	82	1.36989	1.15885	6.09756	1	3.13252	0.0121815	0.116011	+*/**	EIF4G1|LEPROTL1|LYN|MARCKS|TYMS
PID_IL2_STAT5PATHWAY	MSigDB_C2	3	29	0.483575	0.688047	10.3448	1	3.65734	0.0122954	0.116024	++	BCL2|GAB2|IL2RA|EXCLUDED_GENES:|CCND2
Human StemCell_Lottaz10_30genes (20145155-Table1)	GeneSigDB	3	29	0.484004	0.689281	10.3448	1	3.65017	0.0122954	0.116024	+*	CD44|FZD6|TGFBR2
WANG_RESPONSE_TO_BEXAROTENE_DN	MSigDB_C2	3	29	0.483724	0.68974	10.3448	1	3.64815	0.0122954	0.116024	**/+*	HIST1H1C|LYN|PCYT1A
Human Ovarian_MeinholdHeerlein05_40genes (15558012-Table2)	GeneSigDB	3	29	0.484727	0.689715	10.3448	1	3.64683	0.0122954	0.116024	+*	KIF13B|KIF14|PARP4
Dendritic_cell_CD123pos_tonsil	SignatureDB	3	29	0.484127	0.690011	10.3448	1	3.64614	0.0122954	0.116024	+*	LEPREL1|TOX2|VASH2
STANELLE_E2F1_TARGETS	MSigDB_C2	3	29	0.485225	0.689764	10.3448	1	3.64585	0.0122954	0.116024	+*	CFLAR|HSP90B1|MAP3K5
CHOW_RASSF1_TARGETS_DN	MSigDB_C2	3	29	0.485255	0.690383	10.3448	1	3.64253	0.0122954	0.116024	**/+*	BCL3|KLHL21|PPIB
Human StemCell_Amundson08_30genes (18199535-Table2)	GeneSigDB	3	29	0.485784	0.690445	10.3448	1	3.64144	0.0122954	0.116024	+*	CD37|HSP90B1|SLA
Human Lymphoma_Cassinelli09_32genes (19555670-Table1b)	GeneSigDB	3	29	0.486542	0.690659	10.3448	1	3.63922	0.0122954	0.116024	+*	DCTD|LPCAT4|SP100
WAKABAYASHI_ADIPOGENESIS_PPARG_BOUND_36HR	MSigDB_C2	3	29	0.485878	0.690881	10.3448	1	3.63901	0.0122954	0.116024	+*	CLINT1|NGLY1|TRIT1
Human Breast_Parker09_412genes_IntrinsicGenes_Perou2000 (19204204-SupplementaryTable2)	GeneSigDB	13	380	6.35756	2.48204	3.42105	1	2.67621	0.0122113	0.116024	++	AFF3|ARNT2|BCL2|BSPRY|CCL18|CNTNAP1|EBNA1BP2|FZD6|LEPROTL1|PDE4B|SP110|TFRC|TGFBR2
Human Lung_Johnson07_571genes (17699775-SuppTable2)	GeneSigDB	14	422	7.05923	2.61575	3.31754	1	2.65345	0.0121989	0.116024	++	ANP32A|AVEN|CD44|CD47|ELOVL7|IVNS1ABP|LEPROTL1|NEK3|PAK1|PLAGL1|PLCL2|SMARCC1|TFRC|XK
Human Pancreas_Cavard09_736genes (19235837-TableS2a)	GeneSigDB	17	553	9.24885	2.98285	3.07414	1	2.59857	0.0124149	0.117061	++	ARHGEF3|ARNT2|ATP1B3|CD200|CYB5R2|DBN1|EPM2AIP1|IER5|NEK3|NIPA2|OXSR1|SACS|ST3GAL5|SUSD1|TFRC|UCK2|UGCG|EXCLUDED_GENES:|PIM1
LANDIS_ERBB2_BREAST_TUMORS_324_DN	MSigDB_C2	7	148	2.47418	1.55578	4.72973	1	2.90903	0.012453	0.117153	++/++	ATP1B3|CYB5B|GPD2|GYG1|MAN1A1|MARCKS|PLAC8
Human Breast_Waddell08_200genes_BRCA2missense (18497862-TableS4)	GeneSigDB	7	148	2.47637	1.55544	4.72973	1	2.90826	0.012453	0.117153	+*	ADPGK|BCL2|CCR10|EPS15L1|IRF2BP2|RAC2|SCAPER
BROWNE_HCMV_INFECTION_24HR_DN	MSigDB_C2	7	148	2.4769	1.55548	4.72973	1	2.90785	0.012453	0.117153	**/++	B9D1|CD44|CFLAR|ECI1|POLR3G|TGFBR2|UGCG
Human Lymphoma_Zhu05_61genes (15897243-Table1)	GeneSigDB	4	54	0.903048	0.939874	7.40741	1	3.29507	0.0126346	0.118501	+*	BCL2|BCL3|CFLAR|TGFBR2
Human Leukemia_Larsson06_54genes (16423051-Table3)	GeneSigDB	4	54	0.903185	0.940693	7.40741	1	3.29206	0.0126346	0.118501	++	CCL22|CCR7|IL10RA|TMEM184B
Human Leukemia_Heuser05_100genes (16266895-Figure1)	GeneSigDB	4	54	0.902847	0.942333	7.40741	1	3.28669	0.0126346	0.118501	++	CD69|EML4|LITAF|TNFAIP8
RICKMAN_METASTASIS_DN	MSigDB_C2	10	260	4.35186	2.05878	3.84615	1	2.74344	0.0126137	0.118501	**/+*	CD44|IGSF3|MAPKAPK2|PDLIM1|RDX|RNF126|SCAMP2|ST6GALNAC4|TNFAIP8|TRAFD1
SHEN_SMARCA2_TARGETS_UP	MSigDB_C2	14	424	7.09425	2.62006	3.30189	1	2.63572	0.012667	0.118715	+*/**	ANP32A|BBIP1|CLINT1|CNBP|CTR9|GYG1|RDX|SCAPER|SMARCA2|TLK1|TOR1AIP1|U2SURP|WDR11|ZMYND11
MORF_PTEN	MSigDB_C4	5	83	1.38549	1.1651	6.0241	1	3.10232	0.0127895	0.119682	+*	CDYL|P2RY10|PHF16|PIAS2|SLC33A1|EXCLUDED_GENES:|IL16
NEGATIVE_REGULATION_OF_TRANSCRIPTION_FROM_RNA_POLYMERASE_II_PROMOTER	MSigDB_C5	5	83	1.388	1.16616	6.0241	1	3.09735	0.0127895	0.119682	+*	CSDA|STAT3|TGIF1|ZBTB32|ZMYND11
IKEDA_MIR30_TARGETS_UP	MSigDB_C2	6	115	1.92444	1.3708	5.21739	1	2.97312	0.0129144	0.12025	++/**	BCL2|CELF2|FNDC3A|IER5|MARCKS|PTPN2|EXCLUDED_GENES:|CCND2
ATGCAGT,MIR-217	MSigDB_C3	6	115	1.92376	1.37135	5.21739	1	2.97242	0.0129144	0.12025	+*	C18ORF25|CHN2|GPM6A|IVNS1ABP|KCNA3|SLC38A2
ATAAGCT,MIR-21	MSigDB_C3	6	115	1.92197	1.37212	5.21739	1	2.97207	0.0129144	0.12025	+*	ARHGAP24|EHD1|KCNA3|PDCD4|STAT3|TGFBR2
Human StemCell_Bohgaki05_118genes (16014681-table2)	GeneSigDB	6	115	1.92271	1.37201	5.21739	1	2.97176	0.0129144	0.12025	+*	ADRB2|CD69|HSP90B1|IL10|RDX|SLA
Thymic_SP_CD4+Tcell_gt_Thymic_DP_Tcell	SignatureDB	6	115	1.92448	1.37257	5.21739	1	2.96926	0.0129144	0.12025	++	BTLA|CCR7|CD44|GPR183|PTPRJ|S1PR1
NEGATIVE_REGULATION_OF_METABOLIC_PROCESS	MSigDB_C5	10	261	4.36408	2.05743	3.83142	1	2.7393	0.0129281	0.12025	+*	BCL3|CSDA|GCLC|IL10|PDCD4|STAT3|TGIF1|TLE1|ZBTB32|ZMYND11
REACTOME_CYTOKINE_SIGNALING_IN_IMMUNE_SYSTEM	MSigDB_C2	10	261	4.36845	2.06146	3.83142	1	2.73182	0.0129281	0.12025	+*	CD44|EIF4G1|GAB2|HCK|IL2RA|LYN|OAS1|PTPN2|SP100|STAT3|EXCLUDED_GENES:|BLNK|IRF4|PTPN1
DNA_BINDING	MSigDB_C5	18	600	10.0344	3.10234	3	1	2.5676	0.0129204	0.12025	+*	ARNT2|BATF|CHD2|CNBP|CSDA|DNMT3A|HIVEP1|IKZF1|MCM2|PARP4|PHTF1|PLAGL1|SP110|SP140|STAT3|SUB1|TCF4|TGIF1|EXCLUDED_GENES:|ETV6
PID_EPHRINBREVPATHWAY	MSigDB_C2	3	30	0.501408	0.701748	10	1	3.56053	0.0134952	0.124589	++	EPHB1|HCK|LYN
Thymic_progenitor_Tcell_gt_Thymic_DP_Tcell	SignatureDB	3	30	0.501313	0.701898	10	1	3.5599	0.0134952	0.124589	+*	KIAA0226L|MPEG1|PLAC8
Human Leukemia_Kang09_42genes (19880498-TableS4)	GeneSigDB	3	30	0.501691	0.702052	10	1	3.55858	0.0134952	0.124589	+*	CHST2|NFKBIB|UBE2E3
VALK_AML_CLUSTER_4	MSigDB_C2	3	30	0.502198	0.702128	10	1	3.55747	0.0134952	0.124589	+*	CSDA|FZD6|P2RX5
GNF2_TNFSF10	MSigDB_C4	3	30	0.502218	0.702386	10	1	3.55614	0.0134952	0.124589	+*	HCK|LILRA2|MNDA
LY_AGING_PREMATURE_DN	MSigDB_C2	3	30	0.502276	0.702539	10	1	3.55528	0.0134952	0.124589	+*	MCM2|TYMS|UGCG
LAU_APOPTOSIS_CDKN2A_UP	MSigDB_C2	4	55	0.919978	0.950578	7.27273	1	3.24016	0.0134501	0.124589	+*/**	CFLAR|PAK2|PDCD11|PDCD4
ENDOPLASMIC_RETICULUM_MEMBRANE	MSigDB_C5	5	84	1.4043	1.17354	5.95238	1	3.06397	0.0134177	0.124589	+*	ALG3|ERN1|HSP90B1|LMAN1|SLC33A1
chr2q31	MSigDB_C1	5	84	1.40369	1.17411	5.95238	1	3.06301	0.0134177	0.124589	+*	BMPR2|DCAF17|FASTKD1|METTL8|TLK1
STARK_PREFRONTAL_CORTEX_22Q11_DELETION_DN	MSigDB_C2	16	514	8.60181	2.87699	3.11284	1	2.5715	0.0134895	0.124589	++/+*	C18ORF25|CHN2|EPM2AIP1|GTF3A|IDH3A|LEPROTL1|METTL8|MRPL3|NDUFV2|PAK1|POLR1C|SEC61B|SIK3|SMU1|TLE4|ZNF511
KYNG_WERNER_SYNDROM_AND_NORMAL_AGING_DN	MSigDB_C2	9	224	3.74491	1.91116	4.01786	1	2.74969	0.0135071	0.124605	**/+*	ATP1B3|CABLES1|CACNA1D|FAIM3|MCM2|MNDA|SOGA2|STAM|TGFBR2
V$OCT_C	MSigDB_C3	10	263	4.39928	2.06746	3.80228	1	2.70899	0.0135743	0.124947	++	BCL2|CSDA|GAB2|GPM6A|HIST1H2AC|HIST1H2BB|LYN|MANF|PIM2|RAB30|EXCLUDED_GENES:|BLNK
V$HSF1_01	MSigDB_C3	10	263	4.39562	2.07054	3.80228	1	2.70672	0.0135743	0.124947	+*	BMPR2|C7ORF23|CHD1|CHML|EHD1|MYOCD|NETO2|SIDT1|TGIF1|TLK1|EXCLUDED_GENES:|PIM1
V$OCT1_B	MSigDB_C3	10	263	4.39696	2.07128	3.80228	1	2.70511	0.0135743	0.124947	++	BCL2|CSNK1E|GAB2|GPM6A|HIST1H2AC|HIST1H2BB|LYN|PIM2|SPIB|ZBTB32|EXCLUDED_GENES:|BLNK|FOXP1
GOLDRATH_ANTIGEN_RESPONSE	MSigDB_C2	12	344	5.75086	2.36038	3.48837	1	2.64751	0.0136584	0.125577	+*	ADAM8|CCDC50|CD44|CSDA|ELL2|HIST1H1C|IL2RA|LAG3|LITAF|LYN|PLBD1|SP100|EXCLUDED_GENES:|IRF4|PIM1
Mouse EmbryonicStemCell_Abranches09_919genes (19621087-Table1e)	GeneSigDB	17	559	9.35295	3.00084	3.04114	1	2.5483	0.0136733	0.125577	++	BMPR2|CD200|CD47|CELF2|CHN2|DNMT3A|DOCK10|EPM2AIP1|FAM46C|IER5|MARCKS|SLC2A13|TCF4|TLE1|TRAFD1|TSHZ1|ULK2
CAGCTG_V$AP4_Q5	MSigDB_C3	37	1514	25.3196	4.82966	2.44386	1	2.41848	0.0136714	0.125577	++	ABCE1|AICDA|ANKRD12|ANP32A|ARHGAP24|BMPR2|CD47|DCAF17|DLEU1|EBNA1BP2|ERN1|FAM100B|GAB2|HIST1H2BB|HOOK1|IL10|KLF8|MAN1A1|MAP3K5|METTL8|NOSIP|P2RX5|PRKCB|RAB30|SLC43A3|SMARCA2|SPIB|STAT3|TCF4|TGFBR2|TGIF1|TLE4|TOR1AIP1|TRIT1|TUBB4A|UBE2W|WDFY1|EXCLUDED_GENES:|BMF|CCND2|FOXP1|PTPN1
MORF_BNIP1	MSigDB_C4	8	187	3.12736	1.74775	4.27807	1	2.78795	0.0137256	0.125964	+*	BCL2|CASP10|CDYL|P2RY10|PIAS2|SCAPER|SLC33A1|USP46|EXCLUDED_GENES:|IL16
MIPS_SWI_SNF_CHROMATIN_REMODELING_RELATED_BRCA1_COMPLEX	MSigDB_C2	2	11	0.183633	0.424349	18.1818	1	4.28036	0.0138899	0.126347	+*	SMARCA2|SMARCC1
Human Colon_VanErk04_15genes (15140256-Table3)	GeneSigDB	2	11	0.183276	0.424839	18.1818	1	4.27627	0.0138899	0.126347	+*	ITGAE|POLR1C
DNA_MODIFICATION	MSigDB_C5	2	11	0.183701	0.424819	18.1818	1	4.27547	0.0138899	0.126347	+*	DNMT3A|PNP
ATP_DEPENDENT_DNA_HELICASE_ACTIVITY	MSigDB_C5	2	11	0.183674	0.42498	18.1818	1	4.27391	0.0138899	0.126347	+*	CHD1|CHD2
SCHAEFFER_PROSTATE_DEVELOPMENT_AND_CANCER_BOX4_UP	MSigDB_C2	2	11	0.183702	0.42502	18.1818	1	4.27344	0.0138899	0.126347	+*/*+	IRF2BP2|PRKCB
MIPS_NK_3_GROUCHO_HIPK2_SIN3A_RBPA48_HDAC1_COMPLEX	MSigDB_C2	2	11	0.183866	0.424996	18.1818	1	4.2733	0.0138899	0.126347	+*	TLE1|TLE4
REACTOME_CD28_DEPENDENT_VAV1_PATHWAY	MSigDB_C2	2	11	0.183966	0.425308	18.1818	1	4.26993	0.0138899	0.126347	+*	PAK1|PAK2
SEIKE_LUNG_CANCER_POOR_SURVIVAL	MSigDB_C2	2	11	0.184397	0.425884	18.1818	1	4.26314	0.0138899	0.126347	+*	IL10|IL12A
KALMA_E2F1_TARGETS	MSigDB_C2	2	11	0.18451	0.42589	18.1818	1	4.26281	0.0138899	0.126347	+*	MCM2|TYMS
Human Lymphoma_Kaminski03_16genes (12946996-Table2)	GeneSigDB	2	11	0.184182	0.425983	18.1818	1	4.26266	0.0138899	0.126347	+*	PAK1|SLA
Human MultipleMyeloma_Gutierrez10_12genes (20054351-Table3)	GeneSigDB	2	11	0.184833	0.426284	18.1818	1	4.25812	0.0138899	0.126347	+*	ARID3B|GPD2|EXCLUDED_GENES:|FUT8
GOLGI_APPARATUS	MSigDB_C5	9	225	3.76622	1.91497	4	1	2.73309	0.0138698	0.126347	+*	AP3B1|B4GALT1|CHST2|CLINT1|COPB2|FGD2|LMAN1|PKN3|RAB30
WAMUNYOKOLI_OVARIAN_CANCER_LMP_UP	MSigDB_C2	10	264	4.41492	2.07464	3.78788	1	2.69208	0.0139064	0.126401	+*/*+	BSPRY|EIF4G1|FA2H|FAM100B|FAM108C1|IQGAP2|NOSIP|PLAC8|RNF126|SCAMP2
CREIGHTON_ENDOCRINE_THERAPY_RESISTANCE_4	MSigDB_C2	11	304	5.08473	2.22108	3.61842	1	2.66324	0.0139162	0.126401	++	BBIP1|BCL2|CSDA|FAIM3|IL17RB|PARP4|PDCD4|PDLIM1|RNF183|SIK3|SLC19A2|EXCLUDED_GENES:|SH3BP5
MORF_RAD23A	MSigDB_C4	12	345	5.77273	2.36576	3.47826	1	2.63225	0.013945	0.126569	+-	ANP32A|DCTD|ERP29|GLO1|MCM2|MTDH|NDUFV2|RNF126|SMARCC1|TARS|TOMM70A|TYMS
RODRIGUES_DCC_TARGETS_DN	MSigDB_C2	6	117	1.95636	1.38305	5.12821	1	2.9237	0.0139659	0.126665	**/+*	CD44|IQGAP2|LITAF|PDCD4|SMARCA2|TGIF1|EXCLUDED_GENES:|CCND2|FOXP1|PIM1
STEIN_ESRRA_TARGETS_UP	MSigDB_C2	13	387	6.46947	2.50013	3.35917	1	2.61208	0.0140193	0.126964	+*/++	CFLAR|ECI1|EHHADH|FA2H|FASTKD1|HOOK1|IDH3A|IVNS1ABP|MANF|MARCH3|ST3GAL5|ST6GALNAC4|TOMM70A
NUCLEAR_LUMEN	MSigDB_C5	13	387	6.4689	2.50389	3.35917	1	2.60838	0.0140193	0.126964	+*	DNMT3A|ELL2|GNL3|IVNS1ABP|NOLC1|POLR1C|POLR3G|RRP9|SMARCA2|SMARCC1|SP100|SP140|SUB1
Human Lung_Coldren06_110genes (16877703-TableS1)	GeneSigDB	5	85	1.42118	1.17934	5.88235	1	3.03459	0.0140664	0.127204	+*	C10ORF2|NFKBIZ|PARVB|PDCD11|SACS
Mouse Prostate_Ouyang08_121genes (18381418-Table1)	GeneSigDB	5	85	1.42184	1.18112	5.88235	1	3.02946	0.0140664	0.127204	+*	IGHM|IQGAP2|PRKCB|RASGRF1|STAT3
MODULE_64	MSigDB_C4	16	517	8.65202	2.88444	3.09478	1	2.54746	0.0141789	0.128128	+*	ADRB2|CCL18|CD37|CD69|CNTNAP1|DUSP5|EPHB1|GPM6A|GPR183|IL10RA|LAG3|LILRA2|LILRB2|P2RY10|SLA|TNFRSF13B
MIYAGAWA_TARGETS_OF_EWSR1_ETS_FUSIONS_DN	MSigDB_C2	9	226	3.77815	1.91668	3.9823	1	2.72442	0.0142397	0.128302	*+/++	AFF3|CD44|CHST7|ELL2|MARCKS|MIR155HG|NABP1|PTPLA|TLE1|EXCLUDED_GENES:|SH3BP5
RAO_BOUND_BY_SALL4	MSigDB_C2	9	226	3.77962	1.92041	3.9823	1	2.71836	0.0142397	0.128302	++	ANP32A|CHD2|DNMT3A|GPM6A|HIST1H2BB|NOLC1|SLC38A2|STAMBPL1|TLK1
PHONG_TNF_RESPONSE_VIA_P38_COMPLETE	MSigDB_C2	9	226	3.78004	1.9204	3.9823	1	2.71816	0.0142397	0.128302	++	B4GALT1|BCL3|CSNK1E|DUSP5|PNP|TCF4|TGIF1|THYN1|U2SURP|EXCLUDED_GENES:|SH3BP5
HORIUCHI_WTAP_TARGETS_UP	MSigDB_C2	11	305	5.10215	2.22697	3.60656	1	2.64838	0.0142284	0.128302	++/+*	ANKRD12|CD200|CHD2|CHN2|CHST2|DUSP5|HIST1H2AC|KLHL21|MARCH3|SELRC1|ST3GAL5|EXCLUDED_GENES:|ENTPD1
MORF_DEAF1	MSigDB_C4	4	56	0.936407	0.958707	7.14286	1	3.19555	0.0142983	0.128457	+*	ANP32A|DCTD|TARS|TOMM70A
Human Breast_Chen06_56genes (16951191-Table3)	GeneSigDB	4	56	0.936743	0.95898	7.14286	1	3.19429	0.0142983	0.128457	++	BATF|LYN|MARCKS|PDCD4
Human Brain_Foltz06_95genes (16818640-Table1)	GeneSigDB	4	56	0.938174	0.958772	7.14286	1	3.19349	0.0142983	0.128457	+*	ADRB2|BCL2|DUSP5|MAP3K5
RECEPTOR_COMPLEX	MSigDB_C5	4	56	0.937743	0.959715	7.14286	1	3.1908	0.0142983	0.128457	+*	ADRB2|CARD11|ITGAE|TGFBR2
REACTOME_METABOLISM_OF_PROTEINS	MSigDB_C2	14	431	7.20561	2.63627	3.24826	1	2.57728	0.0144163	0.129328	+*	ALG3|B4GALT1|EIF4G1|GMPPB|LMAN1|MAN1A1|PMM2|SEC13|SEC61A1|SEC61B|SRPRB|ST6GALNAC4|TOMM70A|TUBB4A|EXCLUDED_GENES:|FUT8
Human Liver_Skawran08_551genes (18277965-TableS1b)	GeneSigDB	14	431	7.20775	2.63892	3.24826	1	2.57387	0.0144163	0.129328	++	CELF2|GMFG|GPM6A|HCK|IKZF1|LPIN2|MAN1A1|MNDA|MPEG1|NDUFV2|PHACTR2|PLAC8|RNASE6|TMEM39A|EXCLUDED_GENES:|ENTPD1
CYCLIN_D1_KE_.V1_UP	MSigDB_C6	8	189	3.15707	1.75441	4.2328	1	2.76043	0.0145512	0.130255	+*/**	BATF|DUSP5|LPIN2|NEK3|PLK3|PPIB|STAM|TGFBR2
PTEN_DN.V1_UP	MSigDB_C6	8	189	3.16087	1.75562	4.2328	1	2.75637	0.0145512	0.130255	++/**	C16ORF5|CYB5R2|FAM46C|FNBP1L|MAN1A1|MAP3K5|PTPRJ|TLE1
Mouse Testicular_Denolet06_509genes (16166195-TableS1a)	GeneSigDB	12	347	5.80595	2.37539	3.45821	1	2.60759	0.0145319	0.130255	+*	CHD1|FNDC3A|GNPTAB|HSP90B1|MPEG1|PHACTR2|SEC61A1|SLC19A2|SLC25A30|SLC38A5|TFRC|TOMM70A|EXCLUDED_GENES:|PIM1|SH3BP5
Human StemCell_Moreno05_297genes (16288009-SuppTable2)	GeneSigDB	10	266	4.44869	2.08032	3.7594	1	2.66848	0.0145888	0.130403	++	AP3B1|ATP1B3|BCL2|CD200|CREB3L2|ENOSF1|GTF3A|LITAF|PLAGL1|UBE2E3
KEGG_MAPK_SIGNALING_PATHWAY	MSigDB_C2	10	266	4.44586	2.0826	3.7594	1	2.66693	0.0145888	0.130403	+*	CACNA1D|DUSP5|MAP3K5|MAPKAPK2|PAK1|PAK2|PRKCB|RAC2|RASGRF1|TGFBR2
V$MEF2_02	MSigDB_C3	9	227	3.7966	1.92292	3.96476	1	2.70599	0.0146168	0.130559	++	GYG1|HIVEP1|LYN|MYOCD|RASGRF1|S1PR1|SIK3|SMARCA2|XK|EXCLUDED_GENES:|FOXP1
PROTEIN_AMINO_ACID_AUTOPHOSPHORYLATION	MSigDB_C5	3	31	0.518104	0.712363	9.67742	1	3.48403	0.0147592	0.130792	+*	CDK12|PAK1|PAK2
Human Breast_Kim06_33genes_DownRegulated (17178900-Table1b)	GeneSigDB	3	31	0.517785	0.713263	9.67742	1	3.48008	0.0147592	0.130792	+*	ADRB2|DUSP5|TMEM184B
DORSEY_GAB2_TARGETS	MSigDB_C2	3	31	0.518345	0.713124	9.67742	1	3.47998	0.0147592	0.130792	++	CD44|CD69|DUSP5
JAK_STAT_CASCADE	MSigDB_C5	3	31	0.51871	0.713461	9.67742	1	3.47782	0.0147592	0.130792	+*	IL12A|LYN|STAT3
Human Lymphoma_Compagno09_genes (19412164-TableS2)	GeneSigDB	3	31	0.518507	0.713604	9.67742	1	3.47741	0.0147592	0.130792	+*	CARD11|NFKBIB|PRKCB
Human Leukemia_Erkeland06_72genes (16423987-SuppTable3b)	GeneSigDB	3	31	0.518371	0.713814	9.67742	1	3.47657	0.0147592	0.130792	+*	IER5|IL2RA|PNP|EXCLUDED_GENES:|PIM1
REACTOME_CD28_CO_STIMULATION	MSigDB_C2	3	31	0.518959	0.71462	9.67742	1	3.47183	0.0147592	0.130792	+*	LYN|PAK1|PAK2
Mouse StemCell_Lien06_95genes (16618758-SuppTable3)	GeneSigDB	5	86	1.43808	1.18612	5.81395	1	3.003	0.0147358	0.130792	+*	MAP3K5|MRPL3|S1PR1|ST6GALNAC4|SUB1|EXCLUDED_GENES:|PIM1
LU_AGING_BRAIN_DN	MSigDB_C2	7	153	2.55941	1.58008	4.57516	1	2.81035	0.0147229	0.130792	++/++	C5ORF30|C6ORF106|MAT2A|PAK1|PRKCB|RASGRF1|SMARCA2
KEGG_JAK_STAT_SIGNALING_PATHWAY	MSigDB_C2	7	153	2.55967	1.58158	4.57516	1	2.80753	0.0147229	0.130792	+*	IL10|IL10RA|IL12A|IL2RA|PIAS2|STAM|STAT3|EXCLUDED_GENES:|CCND2|PIM1
BRUINS_UVC_RESPONSE_LATE	MSigDB_C2	29	1126	18.835	4.20225	2.57549	1	2.41894	0.0146718	0.130792	++	ADRB2|ARHGAP17|B4GALT1|BMPR2|C5ORF45|CCDC86|EBNA1BP2|ELOVL7|GPX7|GYG1|MAN1A1|MCM2|MLKL|MOCOS|MSRB1|NT5DC2|PAK1|PDE4B|PIAS2|PLAC8|RNF138|SEC61B|SIK3|SRPRB|TCF4|TCTN3|TGFBR2|UBE2E3|UCK2|EXCLUDED_GENES:|CCND2
MODULE_46	MSigDB_C4	13	390	6.52187	2.51261	3.33333	1	2.57825	0.0148543	0.131541	+*	BATF|BCL2|CCL18|CD69|GPR183|LILRA2|LILRA3|LILRB2|MNDA|OAS1|RNASE6|STAT3|TNFRSF13B|EXCLUDED_GENES:|ENTPD1|IL16
Human Kidney_Twine03_132genes (14522937-Table1)	GeneSigDB	6	119	1.99145	1.3957	5.04202	1	2.87208	0.0150756	0.133405	++	BPGM|CSDA|IL10RA|PARVB|PNP|XK
Human StemCell_Chow06_57genes (16116475-Table1)	GeneSigDB	4	57	0.952227	0.965893	7.01754	1	3.15539	0.0151797	0.133466	+*	BCL3|CHD1|KLHL21|PPIB
Human Breast_Mackay03_61genes (12730682-Table1)	GeneSigDB	4	57	0.952192	0.966987	7.01754	1	3.15186	0.0151797	0.133466	++	CHST2|GTF3A|PCK2|SEC61A1
GNF2_ITGB2	MSigDB_C4	4	57	0.953183	0.967342	7.01754	1	3.14968	0.0151797	0.133466	+*	ADAM8|GMFG|HCK|IL10RA
GTACAGG,MIR-486	MSigDB_C3	4	57	0.953547	0.967348	7.01754	1	3.14928	0.0151797	0.133466	+*	AFF3|CELF2|CNPY3|GAB2|EXCLUDED_GENES:|PIM1
Human Viral_Boccardo09_65genes (20042637-Table2)	GeneSigDB	4	57	0.954762	0.967639	7.01754	1	3.14708	0.0151797	0.133466	+*	ENOSF1|MCM2|SLC43A3|TLE1
GNF2_MCL1	MSigDB_C4	4	57	0.954902	0.968633	7.01754	1	3.14371	0.0151797	0.133466	+*	CNPY3|HCK|LILRA6|MNDA
Human Breast_Weisz04_66genes_ERposERneg (15254972-Table1)	GeneSigDB	4	57	0.95472	0.968784	7.01754	1	3.1434	0.0151797	0.133466	+*	CD44|MCM2|MRPL3|NOLC1
Human Brain_Freije04_595genes (15374961-TableS2)	GeneSigDB	15	477	7.98322	2.77448	3.14465	1	2.52905	0.0151247	0.133466	++	ADAM8|BCL3|COL9A3|HK2|LITAF|MARCKS|MCM2|NFKBIZ|PDLIM1|PION|PLBD1|TGIF1|TNFAIP8|TYMS|ZMYND11
GTGACGY_V$E4F1_Q6	MSigDB_C3	19	656	10.9743	3.24356	2.89634	1	2.47434	0.0151751	0.133466	+*	ADPGK|ADRB2|AKIRIN1|C6ORF106|C7ORF23|DUSP5|ELL2|GMPPB|GRWD1|HK2|NOLC1|PAK2|RASGRF1|SLC38A2|STAT3|TFRC|UMPS|ZADH2|ZBTB11|EXCLUDED_GENES:|CCND2
Blood_Module-2.5_Undetermined	SignatureDB	0	247	4.13505	2.00465	0	0	-2.06272	0.0151904	0.133466	-*
Glucose_starve_DN	SignatureDB	7	154	2.57622	1.58503	4.54545	1	2.79098	0.0152101	0.133544	+*/++	BCL2|CD47|EHD1|GCDH|PDCD4|SLA|TUBB4A
GGGCGGR_V$SP1_Q6	MSigDB_C3	64	2929	48.986	6.52023	2.18505	1	2.30268	0.0153278	0.134482	++	ADPGK|AKIRIN1|ANP32A|BATF|BMPR2|C10ORF2|C7ORF23|CACNA1D|CCR10|CNPY3|CNTNAP1|COL9A3|CSDA|CTR9|DLEU1|DNMT3A|DUSP5|EIF4G1|ELL2|EML4|EPS15L1|FAM100B|FKBP11|GCDH|GLO1|GMPPB|HIVEP1|IDH3A|IVNS1ABP|KCTD5|LMAN1|MARCH3|MARCKS|MAT2A|NFKBIB|NFKBID|NOLC1|NOSIP|PAK1|PAK2|PCK2|PHTF1|PIM2|PKN3|POLR3G|PRKCB|PTPN2|RAP1GDS1|RILPL2|RNF138|SEC13|SELRC1|SH2D3C|SMARCA2|ST3GAL5|TCF4|TET2|TLE4|TMEM184B|TNFAIP8|TOX2|ZADH2…
LEE_CALORIE_RESTRICTION_NEOCORTEX_DN	MSigDB_C2	5	87	1.4536	1.19306	5.74713	1	2.97252	0.0154263	0.134773	**/+*	HIST1H1C|PAK1|PCK2|TARS|TFRC
TIEN_INTESTINE_PROBIOTICS_2HR_DN	MSigDB_C2	5	87	1.45648	1.19301	5.74713	1	2.97024	0.0154263	0.134773	*+/+*	CKAP4|DBN1|FKBP11|GAB2|NOC3L
SMITH_TERT_TARGETS_DN	MSigDB_C2	5	87	1.45589	1.19356	5.74713	1	2.96937	0.0154263	0.134773	**/+*	CD47|EHHADH|PNP|SP110|TCF4
Mouse Liver_Ryschich06_100genes_UpRegulated (16397233-Table1)	GeneSigDB	5	87	1.45459	1.19417	5.74713	1	2.96893	0.0154263	0.134773	+*	CELF2|HK2|IL10|TGIF1|TNFAIP8|EXCLUDED_GENES:|PTPN1
TGFB_UP.V1_UP	MSigDB_C6	8	191	3.1961	1.76428	4.18848	1	2.72287	0.0154122	0.134773	++/**	BMPR2|C9ORF91|CSNK1E|ELL2|FNBP1L|PHF16|TNFAIP8|TUBB4A
Human Kidney_Zhao06_259genes (16318415-TableS1)	GeneSigDB	9	229	3.83364	1.93016	3.93013	1	2.67664	0.0153931	0.134773	++	ATXN7L1|BCL2|FNBP1L|IRF2BP2|IVNS1ABP|SIK3|SUB1|TCF4|TNFAIP8
MODULE_239	MSigDB_C4	6	120	2.00883	1.4024	5	1	2.84595	0.0156528	0.136655	+*	AP3B1|CYB5B|GLO1|MANF|SLC38A2|TOR1AIP1
CCCAGAG,MIR-326	MSigDB_C3	7	155	2.59214	1.58943	4.51613	1	2.77324	0.0157086	0.136949	+*	ADAMTS6|CELF2|CNBP|FNDC3A|OXSR1|TBL1XR1|TCF4
FOSTER_TOLERANT_MACROPHAGE_UP	MSigDB_C2	7	155	2.58981	1.59338	4.51613	1	2.76781	0.0157086	0.136949	+*/++	ATXN7L1|CD200|ELL2|ERCC6L2|FAM46C|MCOLN2|MTDH
GOBERT_OLIGODENDROCYTE_DIFFERENTIATION_UP	MSigDB_C2	17	568	9.49645	3.02282	2.99296	1	2.4823	0.015746	0.137179	++/++	AEN|C5ORF45|DCTD|GRWD1|LPCAT4|LPIN2|MCM2|NOLC1|NT5DC2|PDLIM1|PLAGL1|STAMBPL1|TESC|THYN1|TYMS|UMPS|VOPP1
MEMBRANE	MSigDB_C5	46	1988	33.2504	5.48692	2.31388	1	2.32362	0.0157651	0.137249	++	ADAM8|ADRB2|ALG3|ATP1B3|B4GALT1|BCL2|BMPR2|CACNA1D|CARD11|CCR10|CCR7|CD200|CD37|CD47|CD69|CHST7|CKAP4|CNTNAP1|COPB2|CYB5R2|EPHB1|ERN1|FZD6|GPR183|HSP90B1|IL10RA|IL17RB|IL2RA|ITGAE|KCNA3|LILRA3|LILRB2|LMAN1|LYN|P2RX5|PAK1|PRKCB|PTPRJ|S1PR1|SLC33A1|SP140|ST3GAL5|TFRC|TGFBR2|TNFRSF13B|XK|EXCLUDED_GENES:|ENTPD1
CYTOPLASMIC_PART	MSigDB_C5	34	1380	23.082	4.62915	2.46377	1	2.35852	0.0158955	0.138287	++	ABCE1|ADRB2|ALG3|ANP32A|AP3B1|B4GALT1|BCL2|BCL2L10|CABLES1|CHST2|CLINT1|COPB2|EHHADH|EIF4G1|ERN1|ERP29|FGD2|GCDH|HSP90B1|KPTN|LMAN1|MAN1A1|MTHFD1|PCK2|PDCD4|PKN3|PPIB|RAB30|SEC61B|SLC27A5|SLC33A1|TFRC|VOPP1|WDFY1
Mouse StemCell_Schimmer06_588genes (16484322-SuppTable1)	GeneSigDB	15	480	8.03046	2.78642	3.125	1	2.50125	0.0159158	0.138366	++	ALG3|ANP32A|AP3B1|AVEN|CACNA1D|CD44|ERN1|IGSF3|MTDH|PDCD4|RDX|SLC25A30|SLC38A2|STAT3|TFRC|EXCLUDED_GENES:|BLNK|CCND2
GNF2_JAK1	MSigDB_C4	3	32	0.534125	0.723616	9.375	1	3.40771	0.016088	0.138557	+*	ARHGEF3|PION|RAB7L1
PROTEIN_AUTOPROCESSING	MSigDB_C5	3	32	0.534635	0.72411	9.375	1	3.40468	0.016088	0.138557	+*	CDK12|PAK1|PAK2
GNF2_CD48	MSigDB_C4	3	32	0.536035	0.724947	9.375	1	3.39882	0.016088	0.138557	+*	RAC2|SP110|TNFAIP8
Human Leukemia_Yeoh02_40genes_Novel (12086872-Table11b)	GeneSigDB	3	32	0.535327	0.725281	9.375	1	3.39823	0.016088	0.138557	+*	CHST2|CHST7|TLE4
Human Leukemia_Vallat03_36genes (12586635-Figure1bb)	GeneSigDB	3	32	0.536097	0.725964	9.375	1	3.39397	0.016088	0.138557	+*	PPIB|SP110|SPIB
Human StemCell_Fang09_32genes (19454749-Table2)	GeneSigDB	3	32	0.536535	0.726122	9.375	1	3.39263	0.016088	0.138557	+*	MRPL3|ST3GAL5|TFRC
BIOCARTA_HIVNEF_PATHWAY	MSigDB_C2	4	58	0.969799	0.974427	6.89655	1	3.10973	0.0160946	0.138557	+*	BCL2|CFLAR|MAP3K5|PAK2
REGULATION_OF_BINDING	MSigDB_C5	4	58	0.970002	0.975682	6.89655	1	3.10552	0.0160946	0.138557	+*	ADRB2|BCL2|BCL3|CARD11
REACTOME_INTERFERON_GAMMA_SIGNALING	MSigDB_C2	4	58	0.971096	0.977159	6.89655	1	3.0997	0.0160946	0.138557	+*	CD44|OAS1|PTPN2|SP100|EXCLUDED_GENES:|IRF4|PTPN1
V$AP1_Q4	MSigDB_C3	10	270	4.5163	2.09565	3.7037	1	2.6167	0.0160282	0.138557	++	ATXN7L1|CCDC50|CCL22|EIF4G1|GAB2|IL10|PIM2|PKN3|SMARCA2|TGFBR2
BERENJENO_TRANSFORMED_BY_RHOA_DN	MSigDB_C2	13	394	6.59121	2.52652	3.29949	1	2.53661	0.0160261	0.138557	+*/++	CD47|CELF2|MARCKS|PCK2|PDCD4|PNP|SLC38A2|SMARCA2|ST3GAL5|STAT3|TBL1XR1|TCF4|TRAFD1
Mouse Kidney_Takemoto06_733genes (16498405-TableS10)	GeneSigDB	17	569	9.51223	3.02214	2.9877	1	2.47764	0.0159906	0.138557	++	ANP32A|CD200|CD37|COPB2|DNMT3A|DUSP5|EBNA1BP2|IQGAP2|MAT2A|MEX3C|MNDA|NFKBIZ|PARP3|PLAGL1|RDX|RNF138|ZADH2
Human Ovarian_Crijns09_2394Genes_17PathwayPredictor (19192944-TableS4)	GeneSigDB	38	1581	26.4331	4.93189	2.40354	1	2.34533	0.0159534	0.138557	++	ADRB2|BCL2|BMPR2|CACNA1D|CASP10|CCL18|CCL22|CCR7|CNTNAP1|CSDA|CSNK1E|DUSP5|FZD6|IL10|IL10RA|IL12A|IL17RB|IL2RA|IQGAP2|ITGAE|MAP3K5|MAPKAPK2|MCM2|P2RX5|PAK1|PAK2|PARVB|PCK2|PIAS2|POLR3G|RAC2|RASGRF1|RDX|STAM|STAT3|TBL1XR1|TGFBR2|TNFRSF13B|EXCLUDED_GENES:|CCND2|ENTPD1|PTPN1
STRUCTURAL_MOLECULE_ACTIVITY	MSigDB_C5	0	244	4.08307	1.99341	0	0	-2.04828	0.015987	0.138557	-*
DELASERNA_MYOD_TARGETS_UP	MSigDB_C2	5	88	1.4728	1.20045	5.68182	1	2.93824	0.016138	0.138738	++/**	ANXA11|DBN1|STAM|TFRC|VASH2
NEMETH_INFLAMMATORY_RESPONSE_LPS_UP	MSigDB_C2	5	88	1.47171	1.20187	5.68182	1	2.93567	0.016138	0.138738	++/**	CD44|CFLAR|HCK|MAPKAPK2|PNP
Mouse Uterine_Jeong05_296genes (15845616-SuppTable1)	GeneSigDB	9	231	3.86586	1.94199	3.8961	1	2.64375	0.0161994	0.139168	++	CYB5B|IDH3A|MARCKS|MAT2A|MCOLN2|PDLIM1|SLC33A1|TGIF1|TLE1|EXCLUDED_GENES:|BLNK
STARK_PREFRONTAL_CORTEX_22Q11_DELETION_UP	MSigDB_C2	8	193	3.22698	1.77061	4.14508	1	2.69569	0.0163096	0.140018	++/+*	FNDC3A|LPIN2|MARCKS|MTDH|PTPRJ|SMARCA2|SNX18|TCF4|EXCLUDED_GENES:|FOXP1
MODULE_75	MSigDB_C4	13	395	6.60449	2.52838	3.29114	1	2.52949	0.0163298	0.140094	+*	BATF|CCL18|CD69|GMFG|GPR183|HIST1H1C|LILRA2|LILRB2|MNDA|OAS1|RNASE6|STAT3|TNFRSF13B|EXCLUDED_GENES:|IL16
Human Leukemia_Li07_12genes_DNA_RNAProteinSynthesis (17313671-SuppTable1f)	GeneSigDB	2	12	0.200516	0.443713	16.6667	1	4.05551	0.0164852	0.140164	+*	SUB1|TCEB3
REACTOME_TRAFFICKING_AND_PROCESSING_OF_ENDOSOMAL_TLR	MSigDB_C2	2	12	0.200655	0.443737	16.6667	1	4.05498	0.0164852	0.140164	+*	CNPY3|HSP90B1
MIPS_BRM_SIN3A_HDAC_COMPLEX	MSigDB_C2	2	12	0.200344	0.443978	16.6667	1	4.05348	0.0164852	0.140164	+*	SMARCA2|SMARCC1
MODULE_272	MSigDB_C4	2	12	0.200365	0.444073	16.6667	1	4.05256	0.0164852	0.140164	+*	MTHFD1|UMPS
REGULATION_OF_JAK_STAT_CASCADE	MSigDB_C5	2	12	0.200832	0.444003	16.6667	1	4.05215	0.0164852	0.140164	+*	IL12A|LYN
Human Leukemia_Bal05_12genes (15896717-Table8)	GeneSigDB	2	12	0.200485	0.444156	16.6667	1	4.05153	0.0164852	0.140164	+*	BCL2|CFLAR
Human Immune_Kong10_12genes_ImmPort_TGF-betaFamilyMemberReceptors (20460173-ImmPortTGF-betaFamilyMemberReceptors)	GeneSigDB	2	12	0.200643	0.444272	16.6667	1	4.05012	0.0164852	0.140164	+*	BMPR2|TGFBR2
Human Brain_Jrgensen05_19genes (16473350-Table2)	GeneSigDB	2	12	0.201012	0.444428	16.6667	1	4.04787	0.0164852	0.140164	+*	SLC2A13|TOX2
Human Lymphoma_Fernandez10_13genes (20124476-SuppTable3)	GeneSigDB	2	12	0.20096	0.444533	16.6667	1	4.04704	0.0164852	0.140164	+*	CSNK1E|DBN1
Human Brain_Beier07_15genes (17483311-Table1a)	GeneSigDB	2	12	0.200874	0.44456	16.6667	1	4.04698	0.0164852	0.140164	++	COL9A3|TLE1
MODULE_56	MSigDB_C4	2	12	0.200956	0.444586	16.6667	1	4.04656	0.0164852	0.140164	+*	TYMS|UMPS
N_ACETYLGLUCOSAMINE_METABOLIC_PROCESS	MSigDB_C5	2	12	0.201459	0.445153	16.6667	1	4.04027	0.0164852	0.140164	+*	CHST2|CHST7
ACEVEDO_NORMAL_TISSUE_ADJACENT_TO_LIVER_TUMOR_DN	MSigDB_C2	12	353	5.9046	2.39021	3.39943	1	2.55015	0.0164057	0.140164	*+/+*	ABHD10|C19ORF10|CYB5B|EML4|GTF3A|KCTD5|LPIN2|MANF|MOCOS|PNP|SRPRB|ZNF511
TONKS_TARGETS_OF_RUNX1_RUNX1T1_FUSION_ERYTHROCYTE_UP	MSigDB_C2	7	157	2.62497	1.60151	4.4586	1	2.73181	0.0167402	0.142234	++/**	CD200|CXORF21|IL17RB|KIAA0226L|LILRA2|MAN1A1|NETO2
Human Colon_Watanabe06_214genes (16585155-TableS1)	GeneSigDB	8	194	3.24281	1.7781	4.12371	1	2.67543	0.0167721	0.14231	++	ABCE1|CD44|CFLAR|CHD1|CYB5B|IVNS1ABP|LYN|MANF
INTRACELLULAR_SIGNALING_CASCADE	MSigDB_C5	19	663	11.0889	3.25733	2.86576	1	2.42871	0.0167632	0.14231	++	ADRB2|ANP32A|BCL2L10|BCL3|C16ORF5|CFLAR|ERN1|FGD2|IL12A|LITAF|LYN|MAP3K5|MAPKAPK2|OXSR1|PAK1|SH2D3C|STAT3|TLK1|VOPP1|EXCLUDED_GENES:|BLNK|SH3BP5
chr13q14	MSigDB_C1	5	89	1.48925	1.20687	5.61798	1	2.90897	0.0168712	0.142857	+*	DLEU1|FNDC3A|KIAA0226L|NEK3|SLC25A30
RESPONSE_TO_ABIOTIC_STIMULUS	MSigDB_C5	5	89	1.4902	1.20747	5.61798	1	2.90673	0.0168712	0.142857	+*	BCL3|CSDA|FECH|GCLC|IL12A
ACAGGGT,MIR-10A,MIR-10B	MSigDB_C3	6	122	2.04024	1.41332	4.91803	1	2.80173	0.0168527	0.142857	+*	C16ORF5|CELF2|FNBP1L|SLC38A2|USP46|ZMYND11
Human HeadandNeck_Roepman06_396genes (16489042-SuppTable1a)	GeneSigDB	11	313	5.23506	2.25684	3.51438	1	2.55444	0.0169199	0.143171	+*	ANXA11|AVEN|C18ORF25|KLHL21|NFKBIZ|OAS1|PARVB|PHACTR1|SLAMF7|SMARCC1|SPIB
Human Cervical_Lau07_60genes (17369842-Table1)	GeneSigDB	4	59	0.986526	0.984154	6.77966	1	3.06199	0.0170434	0.14392	+*	CFLAR|PAK2|PDCD11|PDCD4
Human StemCell_Novakova10_89genes_Interferons_Receptors (19802007-SuppTable1)	GeneSigDB	4	59	0.98705	0.985133	6.77966	1	3.05842	0.0170434	0.14392	+*	IL10RA|IRF2BP2|OAS1|SP110|EXCLUDED_GENES:|IRF4
IMMUNE_RESPONSE	MSigDB_C5	9	233	3.89505	1.94721	3.86266	1	2.62167	0.0170362	0.14392	+*	ANXA11|BCL2|CCL18|CCL22|GPR183|IL10|IL12A|IL2RA|LILRB2|EXCLUDED_GENES:|BLNK|IL16
MCBRYAN_PUBERTAL_BREAST_4_5WK_DN	MSigDB_C2	8	195	3.26172	1.78532	4.10256	1	2.65403	0.0172441	0.145417	*+/++	ECI1|EHD1|EHHADH|EIF4G1|LOC645638|P2RX5|TBL1XR1|TFRC
Human Embryo_Heim07_273genes (17880687-TableS4)	GeneSigDB	8	195	3.2633	1.78509	4.10256	1	2.65348	0.0172441	0.145417	++	IQGAP2|MAP3K5|MARCKS|PHACTR2|PION|TNFAIP8|TSHZ1|ZADH2|EXCLUDED_GENES:|FOXP1
JAATINEN_HEMATOPOIETIC_STEM_CELL_UP	MSigDB_C2	11	314	5.25071	2.25641	3.50318	1	2.54798	0.0172813	0.145632	++/++	BSPRY|IQGAP2|MIR155HG|NT5DC2|PHACTR1|PHF16|PLAGL1|PTPLA|RAVER2|RDX|SMARCA2|EXCLUDED_GENES:|ETV6
Rat Immune_vanRoon-Mom08_54genes (18844975-Table1a)	GeneSigDB	3	33	0.551336	0.735343	9.09091	1	3.32996	0.0174818	0.146225	+*	CCR7|IL17RB|TNFAIP8
Mouse StemCell_Shachaf08_35genes (18593912-Table1)	GeneSigDB	3	33	0.550824	0.735718	9.09091	1	3.32896	0.0174818	0.146225	+*	BCL2|IL10|TGFBR2
Human Embryo_Heim07_40genes_PValueRank (17880687-TableS6)	GeneSigDB	3	33	0.552175	0.735945	9.09091	1	3.3261	0.0174818	0.146225	+*	TNFAIP8|TSHZ1|ZADH2|EXCLUDED_GENES:|FOXP1
MODULE_522	MSigDB_C4	3	33	0.552869	0.736358	9.09091	1	3.32329	0.0174818	0.146225	++	LAG3|PTPN2|SEC61B|EXCLUDED_GENES:|PTPN1
PID_IL12_STAT4PATHWAY	MSigDB_C2	3	33	0.552865	0.736752	9.09091	1	3.32152	0.0174818	0.146225	+*	IL2RA|PIAS2|STAT3
BIOCARTA_DEATH_PATHWAY	MSigDB_C2	3	33	0.552083	0.737108	9.09091	1	3.32098	0.0174818	0.146225	+*	BCL2|CASP10|CFLAR
GRADE_COLON_CANCER_DN	MSigDB_C2	3	33	0.552672	0.737394	9.09091	1	3.31889	0.0174818	0.146225	**/+*	CCR7|CNTNAP1|EPM2AIP1
SIMBULAN_UV_RESPONSE_NORMAL_DN	MSigDB_C2	3	33	0.552666	0.737822	9.09091	1	3.31697	0.0174818	0.146225	**/+*	ADRB2|CNBP|MARCKS
ZHAN_LATE_DIFFERENTIATION_GENES_UP	MSigDB_C2	3	33	0.553319	0.737847	9.09091	1	3.31598	0.0174818	0.146225	+*/*+	BCL2|DUSP5|XK
GNF2_TYK2	MSigDB_C4	3	33	0.553625	0.737811	9.09091	1	3.31572	0.0174818	0.146225	+*	ADPGK|CHD1|PAK2
Human Breast_van'tVeer02_430genes_ERgenes (11823860-SuppTable4)	GeneSigDB	12	356	5.95497	2.39966	3.37079	1	2.51912	0.0174084	0.146225	++	BMPR2|CREB3L2|ECI1|EML4|FAM46C|IGHM|NOLC1|P2RX5|P2RY10|PIM2|SEC13|SLC43A3
OSWALD_HEMATOPOIETIC_STEM_CELL_IN_COLLAGEN_GEL_DN	MSigDB_C2	10	274	4.58298	2.11107	3.64964	1	2.566	0.0175705	0.146868	+*/++	ANKRD12|BMPR2|CD200|IL17RB|PAK2|SP140|TBL1XR1|TLK1|UBE2W|UGCG
GAVIN_FOXP3_TARGETS_CLUSTER_P6	MSigDB_C2	5	90	1.50606	1.21404	5.55556	1	2.87794	0.0176263	0.147036	+*	CHDH|DCTD|IL17RB|TGFBR2|TYMS
MORI_MATURE_B_LYMPHOCYTE_UP	MSigDB_C2	5	90	1.50557	1.21481	5.55556	1	2.87654	0.0176263	0.147036	++/**	ADRB2|ARHGEF3|IL10RA|MAN1A1|RAP1GDS1
GAVIN_FOXP3_TARGETS_CLUSTER_P7	MSigDB_C2	5	90	1.50664	1.2146	5.55556	1	2.87615	0.0176263	0.147036	++	ADAMTS6|BMPR2|IL10|MARCH3|TNFRSF13B
RICKMAN_TUMOR_DIFFERENTIATED_WELL_VS_POORLY_UP	MSigDB_C2	9	235	3.93128	1.95527	3.82979	1	2.59234	0.0179041	0.149153	++/++	ANP32A|DNMT3A|EML4|GTF3A|IRF2BP2|MAT2A|PDCD4|SMCHD1|TOMM70A
TAGCTTT,MIR-9	MSigDB_C3	9	235	3.93279	1.95779	3.82979	1	2.58823	0.0179041	0.149153	+*	AFF3|CELF2|GPM6A|NFKBIZ|PHF16|S1PR1|SMARCA2|UBE2W|ZMYND11|EXCLUDED_GENES:|CCND2
Human Ovarian_Donninger04_1191genes (15361855-SuppTable1)	GeneSigDB	26	999	16.7031	3.96849	2.6026	1	2.34268	0.0179777	0.149665	++	ARNT2|BMPR2|BSPRY|CD47|CELF2|DBN1|DCTD|DUSP5|ENOSF1|FAM100B|FECH|GCDH|GPD2|HIST1H1C|HIST1H2AC|IRF2BP2|MCM2|MNDA|PARVB|PLEKHG1|RNF138|SLC19A2|SMARCC1|ST6GALNAC4|UBE2W|ULK2|EXCLUDED_GENES:|CCND2|ETV6|IL16
AMIT_EGF_RESPONSE_240_HELA	MSigDB_C2	4	60	1.00257	0.991569	6.66667	1	3.02292	0.0180264	0.149667	+*	BCL3|EHD1|ELL2|MAT2A
GNF2_MYD88	MSigDB_C4	4	60	1.00419	0.991627	6.66667	1	3.0211	0.0180264	0.149667	+*	CNPY3|LILRA6|LYN|PAK2
chr3p22	MSigDB_C1	4	60	1.00375	0.992318	6.66667	1	3.01945	0.0180264	0.149667	+*	EPM2AIP1|OXSR1|PARP3|TGFBR2
GNF2_CDC27	MSigDB_C4	4	60	1.00395	0.992405	6.66667	1	3.01898	0.0180264	0.149667	+*	FECH|GCLC|TFRC|XK
Mouse Uterine_Jeong05_634genes (15845616-SuppTable3)	GeneSigDB	15	488	8.16048	2.80602	3.07377	1	2.43744	0.0181815	0.150854	++	ATP1B3|BCL2|CD44|ELL2|HIST1H1C|HSP90B1|IVNS1ABP|MSRB1|MTDH|NABP1|PLAC8|PTPRJ|SUB1|TGIF1|UGCG|EXCLUDED_GENES:|BLNK
V$NFKAPPAB65_01	MSigDB_C3	9	236	3.9476	1.95812	3.81356	1	2.58024	0.01835	0.15215	++	BCL3|CD69|EIF4G1|ERN1|GPM6A|HIVEP1|IER5|NFKBIB|NFKBID|EXCLUDED_GENES:|BMF
CTAWWWATA_V$RSRFC4_Q2	MSigDB_C3	12	359	6.00264	2.41116	3.34262	1	2.48733	0.0184565	0.152931	++	CHN2|DCAF17|GYG1|HIST1H1C|MAT2A|METTL8|RASGRF1|S1PR1|SIK3|SMARCA2|SPIB|XK|EXCLUDED_GENES:|FOXP1
TGCCAAR_V$NF1_Q6	MSigDB_C3	20	717	11.9912	3.38564	2.7894	1	2.36552	0.0186398	0.154346	++	ADRB2|ANKRD12|ANP32A|C6ORF106|CACNA1D|CKAP4|ECI1|EIF4G1|GAB2|GMPPB|GPR183|IL2RA|IVNS1ABP|KIF13B|MAT2A|P2RY10|RNF183|SMARCA2|STAT3|TCF4|EXCLUDED_GENES:|IL16
Human Lung_not_cancer_Bhattacharya09_16genes (18849563-Table5)	GeneSigDB	2	13	0.215949	0.460449	15.3846	1	3.87459	0.0192694	0.154592	+*	KLF8|PHACTR2
Human Prostate_Bigler03_14genes (12606954-table1a)	GeneSigDB	2	13	0.217012	0.461768	15.3846	1	3.86122	0.0192694	0.154592	+*	IQGAP2|PCK2
KIM_RESPONSE_TO_TSA_AND_DECITABINE_DN	MSigDB_C2	2	13	0.216899	0.461922	15.3846	1	3.86018	0.0192694	0.154592	*+/+*	BCL2L10|PARVB
REACTOME_ACTIVATION_OF_RAC	MSigDB_C2	2	13	0.21728	0.462026	15.3846	1	3.85849	0.0192694	0.154592	+*	PAK1|PAK2
KRISHNAN_FURIN_TARGETS_DN	MSigDB_C2	2	13	0.2174	0.462253	15.3846	1	3.85633	0.0192694	0.154592	**/+*	ADAMTS6|ZNF385C
Human Breast_Man05_15genes_ER (15692763-Table1)	GeneSigDB	2	13	0.217487	0.462282	15.3846	1	3.8559	0.0192694	0.154592	+*	CD44|CFLAR
DNA_DAMAGE_RESPONSESIGNAL_TRANSDUCTION_BY_P53_CLASS_MEDIATOR	MSigDB_C5	2	13	0.217165	0.462366	15.3846	1	3.85589	0.0192694	0.154592	+*	BCL3|C16ORF5
chr3p23	MSigDB_C1	2	13	0.217515	0.462297	15.3846	1	3.85571	0.0192694	0.154592	+*	NGLY1|SMARCC1
MODULE_412	MSigDB_C4	2	13	0.217374	0.462399	15.3846	1	3.85517	0.0192694	0.154592	+*	CD47|ITGAE
GLUCOSAMINE_METABOLIC_PROCESS	MSigDB_C5	2	13	0.217657	0.462451	15.3846	1	3.85413	0.0192694	0.154592	+*	CHST2|CHST7
TYROSINE_PHOSPHORYLATION_OF_STAT_PROTEIN	MSigDB_C5	2	13	0.217647	0.462475	15.3846	1	3.85395	0.0192694	0.154592	+*	IL12A|LYN
POSITIVE_REGULATION_OF_PEPTIDYL_TYROSINE_PHOSPHORYLATION	MSigDB_C5	2	13	0.217424	0.462557	15.3846	1	3.85374	0.0192694	0.154592	+*	IL12A|LYN
POSITIVE_REGULATION_OF_CELL_ADHESION	MSigDB_C5	2	13	0.217616	0.462534	15.3846	1	3.85352	0.0192694	0.154592	+*	CD47|IL12A
MIPS_BAF_COMPLEX	MSigDB_C2	2	13	0.217662	0.462566	15.3846	1	3.85315	0.0192694	0.154592	+*	SMARCA2|SMARCC1
Mouse Thymus_Stremmel05_14genes (15812645-Table1)	GeneSigDB	2	13	0.217469	0.462742	15.3846	1	3.8521	0.0192694	0.154592	+*	IL10|IL12A
Human Colon_Ivanov07_15genes (17086209-Table1a)	GeneSigDB	2	13	0.217902	0.462751	15.3846	1	3.85109	0.0192694	0.154592	+*	MARCKS|TGFBR2
Human Immune_Inomata04_15genes_up (15860227-Table1a)	GeneSigDB	2	13	0.218197	0.462784	15.3846	1	3.85018	0.0192694	0.154592	+*	IL10RA|MARCKS
REACTOME_EXTRINSIC_PATHWAY_FOR_APOPTOSIS	MSigDB_C2	2	13	0.217814	0.462892	15.3846	1	3.85011	0.0192694	0.154592	+*	CASP10|CFLAR
GOLGI_STACK	MSigDB_C5	2	13	0.217845	0.462939	15.3846	1	3.84965	0.0192694	0.154592	+*	B4GALT1|RAB30
VERRECCHIA_RESPONSE_TO_TGFB1_C4	MSigDB_C2	2	13	0.218137	0.462936	15.3846	1	3.84905	0.0192694	0.154592	++	PAK2|RAC2
Human StemCell_Novakova10_22genes (19802007-Table1)	GeneSigDB	2	13	0.218338	0.46316	15.3846	1	3.84676	0.0192694	0.154592	+*	OAS1|SP110|EXCLUDED_GENES:|IRF4
GNF2_RAB7L1	MSigDB_C4	3	34	0.568302	0.746126	8.82353	1	3.2591	0.0189408	0.154592	+*	GNPTAB|PION|RAB7L1
POTTI_CYTOXAN_SENSITIVITY	MSigDB_C2	3	34	0.568219	0.746397	8.82353	1	3.25803	0.0189408	0.154592	+*	ARNT2|MARCKS|TMEM184B
Mouse Leukemia_Lin05_59genes (16103065-Table2)	GeneSigDB	3	34	0.567693	0.746981	8.82353	1	3.25618	0.0189408	0.154592	+*	MTDH|TARS|TFRC
KEGG_FRUCTOSE_AND_MANNOSE_METABOLISM	MSigDB_C2	3	34	0.56872	0.746967	8.82353	1	3.25487	0.0189408	0.154592	+*	GMPPB|HK2|PMM2
GNF2_SPI1	MSigDB_C4	3	34	0.568826	0.747042	8.82353	1	3.2544	0.0189408	0.154592	+*	HCK|MNDA|MSRB1
Human Lymphoma_Jenner03_44genes_2 (12925741-Figure12)	GeneSigDB	3	34	0.568465	0.747242	8.82353	1	3.25401	0.0189408	0.154592	+*	CFLAR|ERP29|TFRC|EXCLUDED_GENES:|IRF4
CAFFAREL_RESPONSE_TO_THC_24HR_5_UP	MSigDB_C2	3	34	0.569738	0.746964	8.82353	1	3.25352	0.0189408	0.154592	+*/**	CNBP|PNP|TFRC
JIANG_HYPOXIA_VIA_VHL	MSigDB_C2	3	34	0.568649	0.747371	8.82353	1	3.2532	0.0189408	0.154592	+*	C6ORF106|CKAP4|PECR
PID_ERBB1_RECEPTOR_PROXIMAL_PATHWAY	MSigDB_C2	3	34	0.56986	0.748134	8.82353	1	3.24827	0.0189408	0.154592	+*	GAB1|PAK1|STAT3|EXCLUDED_GENES:|PTPN1
Mouse StemCell_Pucci09_39genes (19383967-Table2)	GeneSigDB	3	34	0.570122	0.74849	8.82353	1	3.24637	0.0189408	0.154592	+*	CCR7|IL10|IL12A
PID_EPOPATHWAY	MSigDB_C2	3	34	0.56921	0.748892	8.82353	1	3.24585	0.0189408	0.154592	+*	BCL2|GAB1|LYN
MCBRYAN_PUBERTAL_TGFB1_TARGETS_DN	MSigDB_C2	4	61	1.01959	0.999179	6.55738	1	2.98286	0.0190439	0.154592	*+/+*	ARHGEF3|BCL3|GCLC|SFTPB
HADDAD_T_LYMPHOCYTE_AND_NK_PROGENITOR_DN	MSigDB_C2	4	61	1.0204	1.00019	6.55738	1	2.97903	0.0190439	0.154592	*+/+*	CCR7|GPR183|HCK|RNASE6|EXCLUDED_GENES:|BLNK
KYNG_DNA_DAMAGE_BY_UV	MSigDB_C2	4	61	1.02037	1.00066	6.55738	1	2.97765	0.0190439	0.154592	+*	CD69|GPD2|KIF14|STAT3
Human Leukemia_Kiiveri08_100genes_TEL-AML1Tree (18410693-TableS8)	GeneSigDB	4	61	1.02079	1.00116	6.55738	1	2.97577	0.0190439	0.154592	+*	CD44|IQGAP2|MYOCD|PRKCB|EXCLUDED_GENES:|PIM1
WATANABE_RECTAL_CANCER_RADIOTHERAPY_RESPONSIVE_DN	MSigDB_C2	5	92	1.53758	1.22616	5.43478	1	2.82378	0.0192026	0.154592	**/++	ABCE1|CFLAR|CHD1|LYN|RAC2
chr17p11	MSigDB_C1	5	92	1.54073	1.22907	5.43478	1	2.81453	0.0192026	0.154592	+*	B9D1|MYOCD|TBC1D27|TNFRSF13B|ULK2
Human Lymphoma_Lecane05_131genes (16357179-Table2)	GeneSigDB	6	125	2.0881	1.42863	4.8	1	2.73822	0.0187691	0.154592	+*	IRF2BP2|PDCD11|PDCD4|SLC38A2|TFRC|TNFAIP8
POSITIVE_REGULATION_OF_SIGNAL_TRANSDUCTION	MSigDB_C5	6	125	2.09052	1.42919	4.8	1	2.73544	0.0187691	0.154592	+*	ADRB2|CFLAR|IL12A|LITAF|LYN|VOPP1
SANSOM_APC_TARGETS_UP	MSigDB_C2	6	125	2.08936	1.43029	4.8	1	2.73415	0.0187691	0.154592	++/*+	CCDC86|CD44|MCM2|TGFBR2|TGIF1|WDFY1|EXCLUDED_GENES:|CCND2
BIDUS_METASTASIS_DN	MSigDB_C2	7	161	2.6937	1.62016	4.34783	1	2.65794	0.0189455	0.154592	**/++	B4GALT1|CCR10|CFLAR|EHD1|GMFG|PION|SLA
Serum_response_Fb_DN	SignatureDB	8	199	3.32841	1.80155	4.0201	1	2.5931	0.0192276	0.154592	+*/+*	ANKRD12|ARHGEF3|CNTNAP1|GNPTAB|MAN1A1|SFTPB|SNX18|TNFAIP8
Human Prostate_Glinsky04_218genes (15067324-Table3S)	GeneSigDB	8	199	3.32665	1.80419	4.0201	1	2.59027	0.0192276	0.154592	++	ATP1B3|CACNA1D|CD44|CNPY3|GAB2|LEPROTL1|NIPA2|PDCD4
MOOTHA_MITOCHONDRIA	MSigDB_C2	14	447	7.47379	2.68851	3.13199	1	2.42744	0.019111	0.154592	+*	BCL2|C10ORF2|CYB5B|ECI1|EHHADH|FECH|GCDH|GPD2|IDH3A|MRPL3|MTHFD1|NDUFV2|PCK2|TOMM70A
MODULE_136	MSigDB_C4	15	490	8.19629	2.80959	3.06122	1	2.42161	0.0187847	0.154592	++	C6ORF106|CELF2|CHD1|COCH|EPS15L1|FAM108C1|LEPROTL1|MOCOS|PLEKHG1|PTPLA|SLAMF7|STAMBPL1|STAT3|UGCG|ZNF107
NUYTTEN_NIPP1_TARGETS_UP	MSigDB_C2	21	766	12.8214	3.49539	2.74151	1	2.33982	0.0191861	0.154592	+*/++	ADAMTS6|C5ORF30|C5ORF45|CD44|ELL2|HIST1H1C|HIST1H2AC|HIST1H2BB|HK2|MINA|NETO2|NOC3L|OAS1|SLC27A5|SP100|SP140|TCF4|TLE4|TM2D3|UBA5|USP46|EXCLUDED_GENES:|PTPN1
CYTOSKELETAL_PART	MSigDB_C5	0	234	3.91395	1.95376	0	0	-2.00329	0.0189555	0.154592	-*	|EXCLUDED_GENES:|BMF
Human Lymphoma_Piccaluga07_185genes (17304354-Table2s)	GeneSigDB	6	126	2.10683	1.4359	4.7619	1	2.71131	0.0194396	0.155655	++	LILRA6|LILRB2|MARCKS|MPEG1|RNASE6|TCF4|EXCLUDED_GENES:|ENTPD1
Human Lymphoma_VanLoo09_135genes (19797726-SuppTable1a)	GeneSigDB	6	126	2.10904	1.43527	4.7619	1	2.71096	0.0194396	0.155655	++	AFF3|CD37|FAM129C|HOOK1|PHACTR1|PRKCB|EXCLUDED_GENES:|FOXP1|IL16
Human Viral_Urosevic07_495genes (17823660-TableS2)	GeneSigDB	14	448	7.49483	2.69135	3.125	1	2.41707	0.0194388	0.155655	++	CCL18|CKAP4|CREB3L2|EIF4G1|FAIM3|HIST1H1C|HIST1H2AC|LILRA3|LILRA6|MTDH|OAS1|PIAS2|PLAGL1|ZNF101|EXCLUDED_GENES:|ENTPD1
MODULE_83	MSigDB_C4	11	320	5.35527	2.27816	3.4375	1	2.47775	0.0195722	0.156616	+*	ECI1|ERP29|NDUFV2|PNP|PPIB|RRP9|SEC13|SEC61B|SMARCC1|SUB1|TGIF1
MORF_FOSL1	MSigDB_C4	13	405	6.7727	2.55888	3.20988	1	2.4336	0.0196123	0.156835	+*	BCL2|CDYL|CHST7|ELL2|LILRA4|P2RY10|PARVB|PHF16|PIAS2|SCAPER|SLC33A1|ULK2|USP46|EXCLUDED_GENES:|IL16
ZHOU_INFLAMMATORY_RESPONSE_FIMA_DN	MSigDB_C2	10	279	4.66692	2.12906	3.58423	1	2.50491	0.0196492	0.157029	*+/++	ABHD10|AFF3|ARHGEF3|FASTKD1|SLC25A30|SMARCA2|SNX18|THYN1|TSHZ1|VASH2|EXCLUDED_GENES:|IRF4
Human Leukemia_Sun07_283genes (17571080-SuppTable2b)	GeneSigDB	9	239	3.99483	1.97107	3.76569	1	2.53931	0.0197359	0.15762	+*	BCL2|CD37|CNPY3|HCK|IL10|LAG3|NDUFV2|PRKCB|RAB7L1|EXCLUDED_GENES:|CCND2|IRF4|PIM1
Human Leukemia_Lenz08_385genes (19038878-SuppTable3)	GeneSigDB	1	345	5.77083	2.36237	0.289855	0	-2.01951	0.0198198	0.158188	-+	PARL
Human EmbryonicStemCell_Xu09_1311genes (19658189-TableS3)	GeneSigDB	26	1008	16.8564	3.99234	2.57937	1	2.29028	0.0198633	0.158433	++	ADRB2|AFF3|ARHGAP24|BMPR2|CSNK1E|EPM2AIP1|FECH|GNL3|HIST1H1C|HIST1H2AC|IDH3A|LBH|LEPREL1|MYOCD|NFKBIZ|PARP3|PLCL2|PTPLA|SIDT1|SLA|SLC25A30|STAMBPL1|SUSD1|TESC|USP46|ZMYND11
GOZGIT_ESR1_TARGETS_DN	MSigDB_C2	21	769	12.8576	3.50013	2.73082	1	2.3263	0.0199304	0.158865	++/++	AFF3|BATF|CD44|CKAP4|CREB3L2|EPS15L1|KIAA0226L|LPIN2|MAN1A1|MARCKS|NFKBIZ|RAB7L1|SIDT1|SLC19A2|SLC25A30|SP100|SP110|TCF4|TLE1|UGCG|VOPP1|EXCLUDED_GENES:|FOXP1|FUT8
NUCLEAR_ENVELOPE_ENDOPLASMIC_RETICULUM_NETWORK	MSigDB_C5	5	93	1.55525	1.23425	5.37634	1	2.79097	0.0200243	0.159409	+*	ALG3|ERN1|HSP90B1|LMAN1|SLC33A1
Blood_Module-3.1_Interferon_inducible	SignatureDB	5	93	1.55465	1.23499	5.37634	1	2.78979	0.0200243	0.159409	+*	OAS1|PLAC8|SP100|SP110|TRAFD1
SAMOLS_TARGETS_OF_KHSV_MIRNAS_DN	MSigDB_C2	4	62	1.03463	1.00674	6.45161	1	2.94552	0.0200964	0.159571	**/++	CD44|FKBP11|PLAC8|STAT3
PID_TRKRPATHWAY	MSigDB_C2	4	62	1.03564	1.0078	6.45161	1	2.94141	0.0200964	0.159571	+*	GAB1|GAB2|RASGRF1|STAT3
REACTOME_COSTIMULATION_BY_THE_CD28_FAMILY	MSigDB_C2	4	62	1.0379	1.00796	6.45161	1	2.9387	0.0200964	0.159571	+*	BTLA|LYN|PAK1|PAK2
Human Leukemia_Kiiveri08_100genes_MLLParallel (18410693-TableS12)	GeneSigDB	4	62	1.03808	1.00911	6.45161	1	2.9352	0.0200964	0.159571	+*	MAP3K5|RNASE6|SMARCA2|TCF4
Human Prostate_Chambers09_259genes (19489030-SuppTable7)	GeneSigDB	8	201	3.36091	1.81018	3.9801	1	2.56278	0.0202782	0.160809	++	ADAMTS6|C5ORF30|HK2|NOLC1|PNP|POLR3G|TMEM184B|UCK2
WANG_CISPLATIN_RESPONSE_AND_XPC_UP	MSigDB_C2	8	201	3.3607	1.81137	3.9801	1	2.56121	0.0202782	0.160809	+*/++	HIST1H1C|HSP90B1|KIF14|LYN|MANF|RNASE6|SLC43A3|SMARCC1
Human DendriticCells_Emmons08_37genes (18367721-Table1)	GeneSigDB	3	35	0.584162	0.757379	8.57143	1	3.18973	0.0204653	0.161053	+*	CSDA|IL10RA|VOPP1
Human Viral_Delpuech02_38genes (11973655-Table3)	GeneSigDB	3	35	0.584458	0.757513	8.57143	1	3.18878	0.0204653	0.161053	+*	LITAF|MTHFD1|STAT3
ISOMERASE_ACTIVITY	MSigDB_C5	3	35	0.584534	0.757726	8.57143	1	3.18778	0.0204653	0.161053	+*	BPGM|ERP29|PMM2
Human Prostate_Chambers09_47genes (19489030-SuppTable5)	GeneSigDB	3	35	0.585739	0.757498	8.57143	1	3.18715	0.0204653	0.161053	+*	GCLC|HSP90B1|TFRC
Myc_overexpression_2x_UP	SignatureDB	3	35	0.585334	0.757771	8.57143	1	3.18654	0.0204653	0.161053	+*/**	C10ORF2|HK2|RRP9
PID_HIVNEFPATHWAY	MSigDB_C2	3	35	0.585462	0.757758	8.57143	1	3.18642	0.0204653	0.161053	+*	BCL2|CFLAR|MAP3K5
Mouse Lung_Rangasamy09_36genes (19286929-SuppTable2d)	GeneSigDB	3	35	0.584185	0.758182	8.57143	1	3.18633	0.0204653	0.161053	+*	ERN1|FAIM3|PARP3
YAO_TEMPORAL_RESPONSE_TO_PROGESTERONE_CLUSTER_15	MSigDB_C2	3	35	0.584329	0.758166	8.57143	1	3.1862	0.0204653	0.161053	++	GAB1|PCK2|PLAC8
Human Ovarian_Bignotti07_36genes_OSPCvsMets_up (17346539-Table3)	GeneSigDB	3	35	0.585043	0.758388	8.57143	1	3.18433	0.0204653	0.161053	+*	B4GALT1|CHST2|PLBD1
Human Breast_Ayers04_74genes_Response (15136595-Table2)	GeneSigDB	3	35	0.584675	0.758598	8.57143	1	3.18393	0.0204653	0.161053	+*	SEC61A1|TCEB3|TFRC
XU_HGF_SIGNALING_NOT_VIA_AKT1_48HR_UP	MSigDB_C2	3	35	0.58589	0.759376	8.57143	1	3.17907	0.0204653	0.161053	+*/**	CD44|PCK2|ST6GALNAC4
Human Prostate_Zhao10_1841genes (20386565-TableS1)	GeneSigDB	18	631	10.5512	3.17738	2.85261	1	2.34431	0.0203845	0.161053	++	ANKRD12|ATP1B3|B4GALT1|C6ORF106|CASP10|CKAP4|ECI1|EIF4G1|IQGAP2|LYN|MTDH|RDX|SIK3|STAT3|TARS|TNFAIP8|TOMM70A|ZMYND11|EXCLUDED_GENES:|CCND2
V$CIZ_01	MSigDB_C3	9	241	4.03243	1.98312	3.73444	1	2.50492	0.020701	0.162805	++	ATXN7L1|BATF|CHD2|CKAP4|HIVEP1|IGSF3|MYOCD|SMARCA2|TCF4|EXCLUDED_GENES:|BLNK|CCND2
PKCA_DN.V1_DN	MSigDB_C6	7	164	2.7424	1.63714	4.26829	1	2.60064	0.0207276	0.162911	**/+*	CD44|CKAP4|COCH|HK2|IGHM|NFKBIZ|ZSCAN2
KIM_WT1_TARGETS_8HR_DN	MSigDB_C2	6	128	2.14022	1.44692	4.6875	1	2.66759	0.0208292	0.163605	*+/+*	ANP32A|LILRA2|MANF|PLAC8|RAB7L1|ULK2
GRAHAM_CML_DIVIDING_VS_NORMAL_QUIESCENT_DN	MSigDB_C2	5	94	1.571	1.24008	5.31915	1	2.76515	0.0208688	0.163812	+*/++	ADAM8|CD200|CD44|HIST1H2AC|TCF4|EXCLUDED_GENES:|SH3BP5
TATTATA,MIR-374	MSigDB_C3	10	282	4.71686	2.14169	3.5461	1	2.46681	0.0209798	0.164579	++	CD47|CHST2|GPM6A|IL10|MEX3C|NFKBIZ|PDE4B|TLE4|UBE2E3|WDR11|EXCLUDED_GENES:|ETV6|FOXP1
Mouse Viral_Mendoza-Villanueva08_1830genes (19036130-TableS1a)	GeneSigDB	37	1562	26.1186	4.90785	2.36876	1	2.21714	0.0211133	0.165521	++	ACPP|ACSM3|BSPRY|CD47|CFLAR|COCH|ELL2|FA2H|GLO1|GMFG|GPX7|GYG1|HIST1H2AC|HK2|IDH3A|KCTD5|LRRC33|LYN|MCM2|MPEG1|NT5DC2|PDE4B|PLAC8|PLAGL1|PLCL2|PLK3|PNP|PTPLA|SLC43A3|SMARCA2|SP100|STAMBPL1|TCF4|TGFBR2|TYMS|UCK2|ULK2|EXCLUDED_GENES:|CCND2|ENTPD1|FUT8|IRF4|PIM1
Human Breast_Parker09_498genes_IntrinsicGenes_Perreard2006 (19204204-SupplementaryTable3)	GeneSigDB	14	453	7.57382	2.704	3.09051	1	2.37655	0.0211421	0.165642	++	AP3M2|B4GALT1|C9ORF91|CCL18|CSDA|EBNA1BP2|FECH|FKBP11|FZD6|GYG1|HIST1H1C|KIF13B|NFKBIZ|NT5DC2
PROTEIN_AMINO_ACID_DEPHOSPHORYLATION	MSigDB_C5	4	63	1.05349	1.01664	6.34921	1	2.89827	0.0211839	0.165646	+*	DUSP5|PTPLA|PTPN2|PTPRJ
GOTTWEIN_TARGETS_OF_KSHV_MIR_K12_11	MSigDB_C2	4	63	1.05306	1.01686	6.34921	1	2.89809	0.0211839	0.165646	+*	SEC13|SLA|SLC33A1|TLE4
MORF_MSH3	MSigDB_C4	9	242	4.04603	1.98518	3.71901	1	2.49547	0.0211961	0.165646	+*	CASP10|CDYL|LEPROTL1|P2RY10|PHF16|PIAS2|SLC33A1|TMEM184B|USP46|EXCLUDED_GENES:|IL16
Blood_Module-3.2_Inflammation-1	SignatureDB	9	242	4.05056	1.98511	3.71901	1	2.49328	0.0211961	0.165646	++	BCL3|CD44|CHD1|IER5|IRF2BP2|MAPKAPK2|MARCKS|NFKBID|TGIF1
Human StemCell_Hassan09_1544genes (19808871-TableS3)	GeneSigDB	27	1063	17.7747	4.08794	2.53998	1	2.25671	0.0212436	0.165912	++	ABCE1|BCL2|BCL3|CACNA1D|CDYL|CHST7|COCH|DNMT3A|ENOSF1|EPHB1|HIVEP1|KCNA3|MAT2A|MCM2|MTHFD1|NEK3|NOLC1|OXSR1|PAK1|PIM2|PTPN2|RASGRF1|SPIB|STAT3|TFRC|TLE1|TYMS|EXCLUDED_GENES:|CCND2|ETV6
MULTI_ORGANISM_PROCESS	MSigDB_C5	7	165	2.75922	1.64029	4.24242	1	2.58538	0.0213467	0.166507	+*	ABCE1|BCL2|BCL3|CCL22|IL10|IL12A|IVNS1ABP
Human Prostate_Wang09_181genes (19351846-SuppTable2)	GeneSigDB	7	165	2.76127	1.64164	4.24242	1	2.58201	0.0213467	0.166507	+*	ACPP|KIF14|LMAN1|PION|SIK3|SMARCA2|TYMS
PEREZ_TP53_AND_TP63_TARGETS	MSigDB_C2	8	203	3.39729	1.81917	3.94089	1	2.53011	0.021369	0.166576	+*	CELF2|CHST2|COL9A3|FAM46C|KLHL21|LBH|MARCH3|PTPRJ
Human StemCell_Kumamoto08_2005genes (18451145-TableS1)	GeneSigDB	34	1413	23.6286	4.6857	2.40623	1	2.21342	0.0216602	0.168739	++	ACTR8|ARHGEF3|C16ORF5|CASP10|CFLAR|CHST2|CSDA|CYB5R2|FA2H|FNBP1L|GAB1|GNPTAB|IDH3A|IL12A|IPO4|IQGAP2|LBH|LIMD1|LITAF|METTL8|PDCD4|PHTF1|PLAGL1|POLR1C|SLC2A13|SOGA2|STAT3|SUSD1|TLE4|TOR1AIP1|TSHZ1|UGCG|WDFY1|ZNF614|EXCLUDED_GENES:|PTPN1
AGCTCCT,MIR-28	MSigDB_C3	5	95	1.58742	1.24684	5.26316	1	2.73698	0.0217361	0.168905	+*	EPHB1|GPM6A|LBH|MAT2A|TRIT1
Mouse Breast_Bacac06_140genes_StromaDown (17183660-TableS1b)	GeneSigDB	5	95	1.58773	1.24767	5.26316	1	2.73492	0.0217361	0.168905	+*	ACTR8|GLO1|SMU1|TOMM70A|USP46
Human Leukemia_Langer08_138genes (18378853-TableS2)	GeneSigDB	5	95	1.58946	1.2471	5.26316	1	2.73478	0.0217361	0.168905	+*	ATXN7L1|ELL2|IRF2BP2|SIK3|TUBB4A
Human Breast_HernandezVargas07_313genes (17099726-SuppTable1)	GeneSigDB	9	243	4.06281	1.99008	3.7037	1	2.4809	0.0216997	0.168905	++	CD47|CD69|HIST1H2AC|IQGAP2|MAN1A1|MARCKS|RASGRF1|ST3GAL5|TFRC
REGULATION_OF_HOMEOSTATIC_PROCESS	MSigDB_C5	2	14	0.233757	0.47901	14.2857	1	3.68728	0.0222352	0.169484	+*	BCL2|GCLC
KEGG_GLYCOSAMINOGLYCAN_BIOSYNTHESIS_KERATAN_SULFATE	MSigDB_C2	2	14	0.233771	0.479097	14.2857	1	3.68658	0.0222352	0.169484	+*	B4GALT1|CHST2|EXCLUDED_GENES:|FUT8
MODULE_335	MSigDB_C4	2	14	0.234004	0.47925	14.2857	1	3.68492	0.0222352	0.169484	+*	FECH|GCLC
Human Leukemia_Li02_16genes (12041670-Table3)	GeneSigDB	2	14	0.23386	0.479456	14.2857	1	3.68364	0.0222352	0.169484	+*	GYG1|SMARCA2
chr3p12	MSigDB_C1	2	14	0.233971	0.479594	14.2857	1	3.68234	0.0222352	0.169484	++	IL12A|NFKBIZ
MODULE_89	MSigDB_C4	2	14	0.233877	0.479932	14.2857	1	3.67994	0.0222352	0.169484	+*	HIST1H1C|HIST1H2AC
REACTOME_SYNTHESIS_OF_SUBSTRATES_IN_N_GLYCAN_BIOSYTHESIS	MSigDB_C2	2	14	0.234082	0.480054	14.2857	1	3.67858	0.0222352	0.169484	+*	GMPPB|PMM2
REACTOME_SEMA3A_PAK_DEPENDENT_AXON_REPULSION	MSigDB_C2	2	14	0.234346	0.480019	14.2857	1	3.6783	0.0222352	0.169484	+*	PAK1|PAK2
VICENT_METASTASIS_UP	MSigDB_C2	2	14	0.234461	0.480147	14.2857	1	3.67708	0.0222352	0.169484	+*	COCH|TCF4
RESPIRATORY_GASEOUS_EXCHANGE	MSigDB_C5	2	14	0.234375	0.480189	14.2857	1	3.67694	0.0222352	0.169484	+*	BPGM|SFTPB
SREBP1a_up	SignatureDB	2	14	0.234507	0.480193	14.2857	1	3.67663	0.0222352	0.169484	+*	EHHADH|HSP90B1
MIPS_WINAC_COMPLEX	MSigDB_C2	2	14	0.234143	0.480356	14.2857	1	3.67614	0.0222352	0.169484	+*	SMARCA2|SMARCC1
chr13q11	MSigDB_C1	2	14	0.234593	0.480249	14.2857	1	3.67602	0.0222352	0.169484	+*	PARP4|SACS
BAKER_HEMATOPOIESIS_STAT3_TARGETS	MSigDB_C2	2	14	0.234698	0.480424	14.2857	1	3.67447	0.0222352	0.169484	+*	BCL2|PIM2|EXCLUDED_GENES:|CCND2|PIM1
CASPASE_REGULATOR_ACTIVITY	MSigDB_C5	2	14	0.234546	0.48085	14.2857	1	3.67153	0.0222352	0.169484	+*	MAP3K5|TNFAIP8
VANDESLUIS_COMMD1_TARGETS_GROUP_2_UP	MSigDB_C2	2	14	0.235322	0.48135	14.2857	1	3.6661	0.0222352	0.169484	+*	HK2|TFRC|EXCLUDED_GENES:|CCND2
STEARMAN_TUMOR_FIELD_EFFECT_UP	MSigDB_C2	3	36	0.601139	0.768049	8.33333	1	3.12332	0.0220552	0.169484	++	CD200|LOC645638|MPEG1
SHIN_B_CELL_LYMPHOMA_CLUSTER_8	MSigDB_C2	3	36	0.601242	0.76805	8.33333	1	3.12318	0.0220552	0.169484	+*	IL2RA|LYN|NFKBIB
VANTVEER_BREAST_CANCER_BRCA1_UP	MSigDB_C2	3	36	0.601314	0.768383	8.33333	1	3.12173	0.0220552	0.169484	++/**	EML4|IGHM|PIM2
PID_GMCSF_PATHWAY	MSigDB_C2	3	36	0.601478	0.768588	8.33333	1	3.12069	0.0220552	0.169484	+*	GAB2|LYN|STAT3|EXCLUDED_GENES:|PIM1
YOKOE_CANCER_TESTIS_ANTIGENS	MSigDB_C2	3	36	0.601928	0.768458	8.33333	1	3.12063	0.0220552	0.169484	+*	MAT2A|PHF16|TUBB4A
Tcell_cytokine_repressed	SignatureDB	3	36	0.60191	0.768811	8.33333	1	3.11922	0.0220552	0.169484	++	CCR7|HIST1H2AC|PDCD4|EXCLUDED_GENES:|BMF
JIANG_AGING_CEREBRAL_CORTEX_UP	MSigDB_C2	3	36	0.601291	0.769162	8.33333	1	3.1186	0.0220552	0.169484	+*/**	MARCKS|RASGRF1|RDX
Human Thryoid_Chevillard04_43genes (15475448-Table2)	GeneSigDB	3	36	0.601575	0.769127	8.33333	1	3.11837	0.0220552	0.169484	+*	CD47|DUSP5|TFRC
Human Colon_Yokoe08_38genes (18281482-Table1)	GeneSigDB	3	36	0.602014	0.769075	8.33333	1	3.11801	0.0220552	0.169484	+*	MAT2A|PHF16|TUBB4A
GNF2_VAV1	MSigDB_C4	3	36	0.602486	0.769142	8.33333	1	3.11713	0.0220552	0.169484	+*	PAK2|RAC2|SP110
Human Liver_Parent08_55genes (18221535-Table2)	GeneSigDB	3	36	0.602874	0.769316	8.33333	1	3.11592	0.0220552	0.169484	+*	OAS1|SMARCA2|TGFBR2
Mouse BoneMarrow_Jacquelin05_43genes (15947096-TableS1)	GeneSigDB	3	36	0.602708	0.769667	8.33333	1	3.11471	0.0220552	0.169484	++	BCL3|IL2RA|PEBP1|EXCLUDED_GENES:|CCND2
SHEDDEN_LUNG_CANCER_POOR_SURVIVAL_A6	MSigDB_C2	14	455	7.6068	2.70896	3.07692	1	2.36002	0.021854	0.169484	+*	CDYL|ERN1|GABPB1|GPD2|HK2|IL2RA|KCTD5|KIF14|NETO2|NOLC1|PNP|POLR3G|SMC6|TYMS
Human Breast_Parker09_501genes_IntrinsicGenes_Sorlie2003 (19204204-SupplementaryTable6)	GeneSigDB	14	455	7.60797	2.70854	3.07692	1	2.35996	0.021854	0.169484	++	B4GALT1|C9ORF91|CCL18|CSDA|EBNA1BP2|FECH|FKBP11|FZD6|GYG1|HIST1H1C|NFKBIZ|NT5DC2|PDCD4|PEBP1
GCANCTGNY_V$MYOD_Q6	MSigDB_C3	24	921	15.3998	3.8195	2.60586	1	2.25166	0.0221597	0.169484	++	AICDA|ANP32A|ARHGAP24|BMPR2|CD47|DCAF17|DNMT3A|EHD1|FA2H|FAIM3|FGD2|GAB2|KIF13B|MAP3K5|METTL8|PIM2|PRKCB|PTPRJ|SLC43A3|ST3GAL5|TGIF1|TOR1AIP1|TRIT1|TUBB4A|EXCLUDED_GENES:|CCND2|FUT8
Human Lymphoma_Wouters07_81genes (17671232-TableS2b)	GeneSigDB	4	64	1.06942	1.02292	6.25	1	2.86491	0.0223069	0.169612	+*	ADRB2|ERP29|SP140|XK
Human BoneMarrow_Zhan02_69genes (11861292-Table5)	GeneSigDB	4	64	1.07212	1.0246	6.25	1	2.85757	0.0223069	0.169612	+*	ALG3|CD200|CD47|HIST1H1C
ZHAN_MULTIPLE_MYELOMA_UP	MSigDB_C2	4	64	1.07111	1.0265	6.25	1	2.85328	0.0223069	0.169612	+*/**	ALG3|CD200|CD47|HIST1H1C
ACACTAC,MIR-142-3P	MSigDB_C3	6	130	2.1768	1.46004	4.61538	1	2.61855	0.0222846	0.169612	++	EML4|FNBP1L|FNDC3A|MARCKS|PDE4B|STAM
GRADE_COLON_AND_RECTAL_CANCER_UP	MSigDB_C2	10	285	4.76891	2.15496	3.50877	1	2.42746	0.0223749	0.170025	+*/+*	CD44|CNBP|CSNK1E|GCLC|GLO1|GTF3A|MCM2|MRPL3|MTHFD1|TARS
MODULE_124	MSigDB_C4	5	96	1.60315	1.25306	5.20833	1	2.71084	0.0226266	0.171305	+*	CELF2|NFKBIB|NOLC1|RRP9|SMARCC1
Human Stomach_Hofsli05_101genes (15846300-SuppTable2)	GeneSigDB	5	96	1.60554	1.25343	5.20833	1	2.70814	0.0226266	0.171305	++	ANXA11|CSDA|ENOSF1|MAT2A|PNP|EXCLUDED_GENES:|PIM1
ENDOPLASMIC_RETICULUM_PART	MSigDB_C5	5	96	1.60571	1.25386	5.20833	1	2.70707	0.0226266	0.171305	+*	ALG3|ERN1|HSP90B1|LMAN1|SLC33A1
LABBE_WNT3A_TARGETS_DN	MSigDB_C2	5	96	1.60635	1.25408	5.20833	1	2.70608	0.0226266	0.171305	**/+*	HIST1H1C|PRKCB|TGFBR2|TSHZ1|UGCG
Human Lypmhoma_Leval07_241genes (17284527-TableS4)	GeneSigDB	7	167	2.79202	1.65079	4.19162	1	2.54907	0.0226233	0.171305	+*	AFF3|CD69|FAIM3|PDCD4|SEC61A1|SMARCC1|SMCHD1|EXCLUDED_GENES:|FOXP1|IL16
MODULE_6	MSigDB_C4	13	413	6.91085	2.58095	3.1477	1	2.35927	0.0225773	0.171305	++	CD44|COL9A3|DUSP5|ECI1|ELL2|GCLC|GYG1|IGHM|LYN|PLK3|RAC2|ST6GALNAC4|TGFBR2
V$ETS_Q4	MSigDB_C3	9	245	4.09612	1.99685	3.67347	1	2.45581	0.0227325	0.171897	+*	CHD2|GAB2|GMFG|LPCAT4|LYN|NFKBID|SEC61A1|SPIB|WDR11|EXCLUDED_GENES:|BLNK|FOXP1
BLUM_RESPONSE_TO_SALIRASIB_UP	MSigDB_C2	9	245	4.10049	1.99581	3.67347	1	2.4549	0.0227325	0.171897	+*/*+	AVEN|DCTD|ELL2|ERP29|HSP90B1|IL12A|SCAMP2|SLC33A1|TARS
STK33_SKM_UP	MSigDB_C6	10	286	4.78497	2.15576	3.4965	1	2.41912	0.0228546	0.172715	++/++	BCL3|DUSP5|FNBP1L|GPR183|HIST1H2AC|HIST1H2BB|IL10RA|MPEG1|NFKBIZ|UBE2W|EXCLUDED_GENES:|BMF
ORGANELLE_LUMEN	MSigDB_C5	14	458	7.65496	2.71728	3.05677	1	2.33507	0.0229554	0.173265	+*	DNMT3A|ELL2|GNL3|HSP90B1|IVNS1ABP|NOLC1|POLR1C|POLR3G|RRP9|SMARCA2|SMARCC1|SP100|SP140|SUB1
MEMBRANE_ENCLOSED_LUMEN	MSigDB_C5	14	458	7.66503	2.72287	3.05677	1	2.32658	0.0229554	0.173265	+*	DNMT3A|ELL2|GNL3|HSP90B1|IVNS1ABP|NOLC1|POLR1C|POLR3G|RRP9|SMARCA2|SMARCC1|SP100|SP140|SUB1
Human Lymphoma_Piccaluga07_214genes (18006812-TableS2)	GeneSigDB	6	131	2.19184	1.46398	4.58015	1	2.60124	0.0230374	0.173566	++	CD69|CHD1|CHD2|IER5|IRF2BP2|SIK3|EXCLUDED_GENES:|FOXP1
NRL_DN.V1_DN	MSigDB_C6	6	131	2.19204	1.46392	4.58015	1	2.60121	0.0230374	0.173566	**/+*	ADRB2|BSPRY|EPM2AIP1|MINA|MYOCD|PNP
TGCCTTA,MIR-124A	MSigDB_C3	16	548	9.16326	2.96956	2.91971	1	2.30228	0.0230181	0.173566	++	ANXA11|B4GALT1|ELL2|FA2H|FNBP1L|LITAF|MTDH|OXSR1|RAVER2|SCAMP2|SEC13|STAT3|TMEM184B|TRAM2|ULK2|WDFY1|EXCLUDED_GENES:|CCND2|PTPN1
V$TCF11MAFG_01	MSigDB_C3	8	206	3.4471	1.83323	3.8835	1	2.48354	0.0230821	0.173797	+*	CD69|EIF4G1|GAB2|LEPROTL1|PCYT1A|RASGRF1|TLK1|TOMM70A|EXCLUDED_GENES:|FOXP1
PENG_GLUCOSE_DEPRIVATION_DN	MSigDB_C2	7	168	2.80781	1.65387	4.16667	1	2.53478	0.0232809	0.175081	+*/++	BCL2|BCL3|CD47|EHD1|GCDH|SLA|TUBB4A
Human Breast_Pothuri10_180genes (20436685-ST6-2)	GeneSigDB	7	168	2.80984	1.65662	4.16667	1	2.52934	0.0232809	0.175081	+*	ABCE1|CCL18|CLINT1|FNDC3A|GCLC|LILRB2|MARCH3
IMMUNE_SYSTEM_PROCESS	MSigDB_C5	11	329	5.50257	2.31315	3.34347	1	2.3766	0.0234197	0.176018	+*	ANXA11|BCL2|CCL18|CCL22|CD47|GPR183|IL10|IL12A|IL2RA|LILRB2|LYN|EXCLUDED_GENES:|BLNK|IL16
GOLDRATH_IMMUNE_MEMORY	MSigDB_C2	4	65	1.08581	1.03189	6.15385	1	2.82412	0.0234656	0.176042	++	ECI1|IL10RA|MCOLN2|RNF138
FONTAINE_PAPILLARY_THYROID_CARCINOMA_UP	MSigDB_C2	4	65	1.08733	1.0323	6.15385	1	2.82152	0.0234656	0.176042	+*/**	CD47|PDCD4|PDLIM1|TESC
Human Leukemia_Hernandez09_66genes (19252174-Table3)	GeneSigDB	4	65	1.08755	1.03246	6.15385	1	2.82089	0.0234656	0.176042	+*	CACNA1D|RASGRF1|STAMBPL1|TGFBR2
GGCAGTG,MIR-324-3P	MSigDB_C3	5	97	1.62239	1.25995	5.15464	1	2.68076	0.0235403	0.176495	+*	CELF2|EIF4G1|GPX7|IVNS1ABP|SLC38A2
HOWLIN_CITED1_TARGETS_1_DN	MSigDB_C2	3	37	0.618513	0.778655	8.10811	1	3.05846	0.0237107	0.176595	**/++	IER5|NABP1|TFRC
BIOCARTA_MET_PATHWAY	MSigDB_C2	3	37	0.618517	0.778679	8.10811	1	3.05836	0.0237107	0.176595	++	GAB1|PAK1|STAT3
Human Lymphoma_Staub09_39genes (19399471-Table1)	GeneSigDB	3	37	0.617808	0.779066	8.10811	1	3.05775	0.0237107	0.176595	+*	AVEN|MINA|UBE2E3
GEISS_RESPONSE_TO_DSRNA_UP	MSigDB_C2	3	37	0.618681	0.779038	8.10811	1	3.05675	0.0237107	0.176595	+*/+*	CD44|CFLAR|IQGAP2
Mouse InVitro_Pandini04_45genes (15650270-Table1)	GeneSigDB	3	37	0.619614	0.779144	8.10811	1	3.05513	0.0237107	0.176595	+*	ANP32A|FAM100B|PDCD4
Human Lymphoma_Guedez05_40genes (15479729-Table1)	GeneSigDB	3	37	0.619979	0.779786	8.10811	1	3.05215	0.0237107	0.176595	+*	CD44|IL10|TGFBR2
chr3q12	MSigDB_C1	3	37	0.61961	0.780114	8.10811	1	3.05134	0.0237107	0.176595	+*	CD200|TOMM70A|ZBTB11
Human Leukemia_Larsson06_37genes (16423051-Table2)	GeneSigDB	3	37	0.619556	0.78048	8.10811	1	3.04997	0.0237107	0.176595	++	ARHGEF3|CD69|MNDA
SULFUR_METABOLIC_PROCESS	MSigDB_C5	3	37	0.620169	0.780646	8.10811	1	3.04854	0.0237107	0.176595	+*	CHST2|CHST7|GCLC
Human Lung_Johnson07_1334genes (17699775-SuppTable1)	GeneSigDB	24	927	15.5072	3.83345	2.589	1	2.21544	0.0237002	0.176595	+*	ARID3A|C7ORF23|CREB3L2|DBN1|ELOVL7|FZD6|HIST1H1C|HIST1H2AC|IPO4|LEPROTL1|MARCKS|MCM2|NABP1|NEK3|NOLC1|OAS1|PLAGL1|POLR3G|SACS|SMARCA2|SOGA2|TFRC|TYMS|UGCG|EXCLUDED_GENES:|SH3BP5
PLASMA_MEMBRANE	MSigDB_C5	34	1423	23.8118	4.69739	2.38932	1	2.1689	0.0237015	0.176595	++	ADAM8|ADRB2|ATP1B3|B4GALT1|BMPR2|CACNA1D|CARD11|CCR10|CCR7|CD200|CD37|CD47|CD69|CNTNAP1|EPHB1|FZD6|GPR183|IL10RA|IL17RB|IL2RA|ITGAE|KCNA3|LILRA3|LILRB2|LYN|P2RX5|PAK1|PRKCB|PTPRJ|S1PR1|SLC33A1|ST3GAL5|TFRC|TNFRSF13B|EXCLUDED_GENES:|ENTPD1
V$AP3_Q6	MSigDB_C3	9	247	4.13066	2.00618	3.64372	1	2.42718	0.0238	0.177154	++	ARHGAP17|CHD2|EIF4G1|ERN1|HIVEP1|MYOCD|SMC6|TBL1XR1|TGIF1
Rat Immune_Rioja04_438genes (15642130-TableS1)	GeneSigDB	11	330	5.51445	2.31157	3.33333	1	2.37308	0.023879	0.177635	+*	ADPRH|B4GALT1|CD37|CD44|ERP29|GMFG|HCK|LITAF|MPEG1|PDE4B|SLA|EXCLUDED_GENES:|PTPN1
AMUNDSON_POOR_SURVIVAL_AFTER_GAMMA_RADIATION_2G	MSigDB_C2	7	169	2.8288	1.66471	4.14201	1	2.50566	0.0239516	0.178068	++	ANP32A|GMFG|IKZF1|RAC2|SLA|TMEM184B|ULK2
Human Breast_Barry10_1022genes (20368555-TS-1)	GeneSigDB	22	832	13.9161	3.63153	2.64423	1	2.22603	0.0240694	0.178837	++	AFF3|ATP1B3|BCL2|C5ORF30|CACNA1D|CCL18|CFLAR|CHST2|IVNS1ABP|KIF14|LAG3|LYN|NT5DC2|PTPN2|SLC19A2|SLC43A3|TCEB3|TRIT1|TYMS|UBE2E3|UCK2|UGCG|EXCLUDED_GENES:|FUT8
ZHENG_GLIOBLASTOMA_PLASTICITY_UP	MSigDB_C2	9	248	4.14613	2.01026	3.62903	1	2.41455	0.024347	0.180573	+*/*+	FZD6|GPD2|GPM6A|LYN|MCM2|RAB7L1|SNX18|TESC|TLE1|EXCLUDED_GENES:|CCND2
BENPORATH_OCT4_TARGETS	MSigDB_C2	10	289	4.83201	2.16521	3.46021	1	2.38683	0.0243383	0.180573	++	CABLES1|CDYL|GNPTAB|LSG1|PAK1|POLR3G|PTPN2|STAT3|TBL1XR1|TCF4|EXCLUDED_GENES:|ENTPD1
GABRIELY_MIR21_TARGETS	MSigDB_C2	10	289	4.8347	2.16787	3.46021	1	2.38266	0.0243383	0.180573	++	BMPR2|DOCK10|GPD2|PDCD4|PHACTR2|STAT3|TBL1XR1|TGFBR2|VASH2|ZADH2
MARTINEZ_RB1_AND_TP53_TARGETS_UP	MSigDB_C2	17	598	10.0014	3.10021	2.84281	1	2.25744	0.0244578	0.181287	++/*+	CD44|CELF2|CTR9|EIF4G1|FECH|GLO1|HIST1H1C|IKZF1|LITAF|LMAN1|MRPL3|NABP1|PARP3|PCYT1A|SLC25A30|TFRC|TGFBR2|EXCLUDED_GENES:|CCND2
HAHTOLA_SEZARY_SYNDROM_UP	MSigDB_C2	5	98	1.63968	1.26677	5.10204	1	2.65267	0.0244775	0.181293	+*/*+	CCR10|HIST1H1C|IL2RA|PNP|TYMS
ONDER_CDH1_TARGETS_2_DN	MSigDB_C2	14	462	7.7268	2.72632	3.0303	1	2.30098	0.0244879	0.181293	*+/++	ADAM8|ADRB2|ADTRP|ARHGEF3|CD44|CYB5R2|GCLC|HOOK1|IGSF3|LEPREL1|LPCAT4|LYN|P2RX5|TFRC|EXCLUDED_GENES:|CCND2
SCHLOSSER_SERUM_RESPONSE_UP	MSigDB_C2	6	133	2.22401	1.47439	4.51128	1	2.56105	0.0245938	0.181859	+*/++	BCL2|CDKL1|ELL2|GAB1|PCYT1A|STAT3|EXCLUDED_GENES:|PTPN1
PANGAS_TUMOR_SUPPRESSION_BY_SMAD1_AND_SMAD5_UP	MSigDB_C2	6	133	2.22522	1.47502	4.51128	1	2.55913	0.0245938	0.181859	++/+*	CELF2|GMFG|LBH|LITAF|TCF4|TNFAIP8|EXCLUDED_GENES:|PTPN1
Human Prostate_Tamura07_70genes (17545589-Table2)	GeneSigDB	4	66	1.10269	1.03896	6.06061	1	2.78867	0.0246601	0.181914	+*	ACPP|CD44|IQGAP2|THYN1
Human Breast_Yu08_73genes_W2GeneList_outcome (18231641-W2GeneList)	GeneSigDB	4	66	1.10203	1.04054	6.06061	1	2.78506	0.0246601	0.181914	+*	CD44|KIF14|LITAF|MCM2
SIG_PIP3_SIGNALING_IN_CARDIAC_MYOCTES	MSigDB_C2	4	66	1.10456	1.04112	6.06061	1	2.78108	0.0246601	0.181914	+*	GAB1|NOLC1|PAK1|PAK2|EXCLUDED_GENES:|PTPN1
Human Breast_Horlings10_183genes (20068109-SuppTable4)	GeneSigDB	7	170	2.84373	1.66603	4.11765	1	2.49472	0.0246355	0.181914	+*	ATP13A3|CACNA1D|CNBP|CYB5B|FA2H|GTF3A|NETO2
Human Lung_Ichikawa05_425genes (16207250-TableS2)	GeneSigDB	8	209	3.49225	1.84486	3.82775	1	2.44341	0.0248896	0.183279	+*	ANP32A|BCL2|BPGM|GABPB1|PDE4B|TFRC|TGFBR2|UGCG
SANSOM_APC_TARGETS_REQUIRE_MYC	MSigDB_C2	8	209	3.49436	1.84583	3.82775	1	2.44098	0.0248896	0.183279	+*	C16ORF5|C16ORF88|CCDC86|CSDA|FZD6|METTL13|RRP9|TSEN2
TTTGCAG,MIR-518A-2	MSigDB_C3	8	209	3.49773	1.84729	3.82775	1	2.43724	0.0248896	0.183279	+*	BCL2|C18ORF25|CD47|CREB3L2|DOCK10|IVNS1ABP|MAN1A1|TOMM70A
SCHAEFFER_PROSTATE_DEVELOPMENT_AND_CANCER_BOX1_UP	MSigDB_C2	2	15	0.249593	0.496154	13.3333	1	3.52795	0.0253761	0.183391	+*/**	SMARCA2|TLE1
Mouse Leukemia_Torchia07_25genes (17875932-TableS3)	GeneSigDB	2	15	0.25054	0.496022	13.3333	1	3.52698	0.0253761	0.183391	+*	CFLAR|SMC6
BIOCARTA_HSP27_PATHWAY	MSigDB_C2	2	15	0.250257	0.496283	13.3333	1	3.5257	0.0253761	0.183391	+*	BCL2|MAPKAPK2
Human Mouth_Ruutu04_15genes (15517866-Table5)	GeneSigDB	2	15	0.250606	0.496442	13.3333	1	3.52386	0.0253761	0.183391	+*	MAP3K5|SP100
LIU_IL13_PRIMING_MODEL	MSigDB_C2	2	15	0.250813	0.496526	13.3333	1	3.52285	0.0253761	0.183391	+*	CDYL|PLK3
POSITIVE_REGULATION_OF_CYTOKINE_PRODUCTION	MSigDB_C5	2	15	0.250922	0.496512	13.3333	1	3.52273	0.0253761	0.183391	+*	CARD11|IL12A
FIGUEROA_AML_METHYLATION_CLUSTER_4_DN	MSigDB_C2	2	15	0.250615	0.496602	13.3333	1	3.52271	0.0253761	0.183391	*+/+*	CCR7|IL2RA
RRNA_PROCESSING	MSigDB_C5	2	15	0.251061	0.496626	13.3333	1	3.52164	0.0253761	0.183391	+*	NOLC1|RRP9
DNA_DAMAGE_RESPONSESIGNAL_TRANSDUCTION_RESULTING_IN_INDUCTION_OF_APOPTOSIS	MSigDB_C5	2	15	0.250833	0.496818	13.3333	1	3.52074	0.0253761	0.183391	+*	BCL3|C16ORF5
TONKS_TARGETS_OF_RUNX1_RUNX1T1_FUSION_SUSTAINED_IN_GRANULOCYTE_UP	MSigDB_C2	2	15	0.250755	0.497022	13.3333	1	3.51945	0.0253761	0.183391	++/*+	CD200|IL17RB
Human Leukemia_Chiaretti05_16genes (16243790-Table4)	GeneSigDB	2	15	0.250996	0.497089	13.3333	1	3.51849	0.0253761	0.183391	+*	OXSR1|PRKCB
T_cell_up_ionomycin_anergy	SignatureDB	2	15	0.251612	0.496968	13.3333	1	3.51811	0.0253761	0.183391	+*	IKZF1|TLE4|EXCLUDED_GENES:|PTPN1
HOLLEMAN_VINCRISTINE_RESISTANCE_B_ALL_DN	MSigDB_C2	2	15	0.251238	0.497077	13.3333	1	3.51809	0.0253761	0.183391	+*/+*	CD44|PDLIM1
Human Leukemia_Sanchez-Guijo08_15genes (18722011-SuppTable2m)	GeneSigDB	2	15	0.250836	0.49726	13.3333	1	3.5176	0.0253761	0.183391	+*	MEX3C|UBE2W
MIPS_AP3_BLOC1_COMPLEX	MSigDB_C2	2	15	0.251012	0.497425	13.3333	1	3.51609	0.0253761	0.183391	+*	AP3B1|AP3M2
SANDERSON_PPARA_TARGETS	MSigDB_C2	2	15	0.251419	0.497415	13.3333	1	3.51534	0.0253761	0.183391	+*	ECI1|EHHADH
DAVICIONI_RHABDOMYOSARCOMA_PAX_FOXO1_FUSION_DN	MSigDB_C2	2	15	0.251221	0.497622	13.3333	1	3.51427	0.0253761	0.183391	**/+*	MARCKS|TCF4
MIPS_BRM_SIN3A_COMPLEX	MSigDB_C2	2	15	0.251808	0.497625	13.3333	1	3.51307	0.0253761	0.183391	+*	SMARCA2|SMARCC1
GNF2_CD97	MSigDB_C4	3	38	0.634581	0.788688	7.89474	1	2.99918	0.0254317	0.183391	+*	ADAM8|IL10RA|LITAF
BIOCARTA_FCER1_PATHWAY	MSigDB_C2	3	38	0.634468	0.789022	7.89474	1	2.99806	0.0254317	0.183391	+*	LYN|PAK2|PRKCB
MCBRYAN_PUBERTAL_BREAST_3_4WK_DN	MSigDB_C2	3	38	0.635	0.789269	7.89474	1	2.99644	0.0254317	0.183391	*+/+*	IGHM|LOC645638|NDUFV2
Mouse Skin_Schlingemann03_46 (12640676-Table3)	GeneSigDB	3	38	0.634444	0.789572	7.89474	1	2.996	0.0254317	0.183391	+*	MAT2A|NABP1|PLBD1
Mouse Lung_Rangasamy09_43genes (19286929-SuppTable2m)	GeneSigDB	3	38	0.634124	0.789826	7.89474	1	2.99544	0.0254317	0.183391	+*	BCL2|LYN|RAB7L1
REACTOME_TRIGLYCERIDE_BIOSYNTHESIS	MSigDB_C2	3	38	0.635217	0.789522	7.89474	1	2.99521	0.0254317	0.183391	+*	ELOVL7|LPCAT4|LPIN2
Plasma_cell_gt_mature_Bcell	SignatureDB	3	38	0.635649	0.789976	7.89474	1	2.99294	0.0254317	0.183391	+*	CASP10|CFLAR|SLAMF7
Human Embryo_Heim07_49genes (17880687-Table1)	GeneSigDB	3	38	0.634944	0.790361	7.89474	1	2.99237	0.0254317	0.183391	+*	MAP3K5|TSHZ1|ZADH2
MODULE_447	MSigDB_C4	3	38	0.635314	0.790379	7.89474	1	2.99184	0.0254317	0.183391	+*	ECI1|NOLC1|SEC61B
KAAB_FAILED_HEART_ATRIUM_UP	MSigDB_C2	3	38	0.635941	0.790188	7.89474	1	2.99177	0.0254317	0.183391	+*/*+	ATXN7L1|LILRA4|SPIB
KRASNOSELSKAYA_ILF3_TARGETS_UP	MSigDB_C2	3	38	0.636946	0.790462	7.89474	1	2.98946	0.0254317	0.183391	+*/+*	HIST1H1C|HIST1H2AC|OAS1
Human Prostate_Ashida04_41genes (15342375-Table3)	GeneSigDB	3	38	0.635856	0.791019	7.89474	1	2.98873	0.0254317	0.183391	++	DNMT3A|HIST1H1C|ZNF511
BIOCARTA_IL2RB_PATHWAY	MSigDB_C2	3	38	0.636579	0.791102	7.89474	1	2.9875	0.0254317	0.183391	+*	BCL2|CFLAR|IL2RA
DING_LUNG_CANCER_EXPRESSION_BY_COPY_NUMBER	MSigDB_C2	5	99	1.65536	1.27308	5.05051	1	2.6272	0.0254385	0.183391	+*	DCTD|GTF3A|NEK3|PAK2|TOMM70A
Human Breast_Thuerigen06_512genes_TGFb (16622258-SuppTable2)	GeneSigDB	13	420	7.02759	2.60666	3.09524	1	2.29121	0.0254347	0.183391	++	B4GALT1|GNL3|HIVEP1|IPO4|LEPREL1|MEX3C|MINA|OXSR1|PEBP1|PECR|PKN3|RRP9|SMU1
BENPORATH_CYCLING_GENES	MSigDB_C2	18	646	10.8058	3.22028	2.78638	1	2.23403	0.0250167	0.183391	+*	ABHD10|AP3M2|ASPHD2|CFLAR|CHML|CTR9|CYB5R2|ENOSF1|HIST1H2AC|IVNS1ABP|KIF14|MCM2|RNF126|SLC38A2|SOGA2|TGIF1|TOMM70A|TYMS
V$CREB_Q3	MSigDB_C3	9	250	4.1805	2.01466	3.6	1	2.39221	0.0254677	0.183495	+*	ABCE1|CHD2|KPTN|NOLC1|PAK1|RAP1GDS1|STAT3|TLK1|TMEM39A|EXCLUDED_GENES:|CCND2
Mouse EmbryonicStemCell_Romito10_276genes (20140255-TableS2)	GeneSigDB	8	210	3.51151	1.85006	3.80952	1	2.42614	0.0255135	0.183718	++	CD37|CREB3L2|FAM46C|HIST1H1C|IL12A|PLAGL1|PLK3|TESC
GAJATE_RESPONSE_TO_TRABECTEDIN_UP	MSigDB_C2	4	67	1.11865	1.04696	5.97015	1	2.75211	0.0258907	0.185678	+*/**	CD44|DUSP5|PCK2|UGCG
Human Liver_Tsuchiya10_91genes (20380719-TableS5)	GeneSigDB	4	67	1.11997	1.04678	5.97015	1	2.75133	0.0258907	0.185678	+*	HIST1H2AC|PMM2|SNX18|TBL1XR1
VANHARANTA_UTERINE_FIBROID_WITH_7Q_DELETION_UP	MSigDB_C2	4	67	1.11946	1.04785	5.97015	1	2.74899	0.0258907	0.185678	+*/*+	C19ORF10|PTPN2|RNF138|TNFAIP8
Human Lung_not_cancer_Temple01_78genes (11694447-Figure2)	GeneSigDB	4	67	1.12118	1.04847	5.97015	1	2.74573	0.0258907	0.185678	+*	BCL3|CD69|DUSP5|PDE4B|EXCLUDED_GENES:|PIM1
REGULATION_OF_MAP_KINASE_ACTIVITY	MSigDB_C5	4	67	1.12084	1.04894	5.97015	1	2.74482	0.0258907	0.185678	+*	ADRB2|MAP3K5|PAK1|PDCD4
ELVIDGE_HIF1A_TARGETS_UP	MSigDB_C2	4	67	1.12125	1.04902	5.97015	1	2.74421	0.0258907	0.185678	+*/**	CCDC86|GYG1|IDH3A|LSG1
ENDOSOME	MSigDB_C5	4	67	1.12172	1.04899	5.97015	1	2.74385	0.0258907	0.185678	+*	ADRB2|TFRC|VOPP1|WDFY1
GGGAGGRR_V$MAZ_Q6	MSigDB_C3	50	2263	37.8519	5.81739	2.20946	1	2.08823	0.0259205	0.185784	++	AICDA|AKIRIN1|ANP32A|ARHGAP24|ATXN7L1|BMPR2|CCR7|CD44|CD47|CDK12|CHD1|CHD2|CSNK1E|DNMT3A|EIF4G1|FGD2|FNBP1L|GMFG|IER5|IPO4|IVNS1ABP|KCNA3|LAG3|LMAN1|MANF|MARCKS|MEX3C|NOSIP|PKN3|PLK3|PTPLA|PTPRJ|RAP1GDS1|RILPL2|RNF138|RNF183|S1PR1|SELRC1|SH2D3C|SMARCA2|SMARCC1|SMC6|SP140|SPIB|STAT3|TCF4|TGIF1|TLK1|TUBB4A|ZSCAN2|EXCLUDED_GENES:|BMF|CCND2|ENTPD1|FUT8|IL16|PIM1
V$PEA3_Q6	MSigDB_C3	9	251	4.19726	2.01932	3.58566	1	2.3784	0.0260415	0.186219	++	CD69|DUSP5|GAB2|IL2RA|LAG3|MAPKAPK2|RAB30|SIK3|TCEB3|EXCLUDED_GENES:|BLNK
V$HLF_01	MSigDB_C3	9	251	4.20136	2.02209	3.58566	1	2.37312	0.0260415	0.186219	++	ADRB2|CDYL|CELF2|CHD2|CSNK1E|EML4|NFKBIZ|SPIB|XK|EXCLUDED_GENES:|FOXP1
DAVICIONI_TARGETS_OF_PAX_FOXO1_FUSIONS_UP	MSigDB_C2	9	251	4.20084	2.0226	3.58566	1	2.37277	0.0260415	0.186219	++/*+	CD44|CSNK1E|LEPREL1|MAP3K5|MARCH3|PHACTR2|ST3GAL5|TGIF1|TRAM2|EXCLUDED_GENES:|CCND2|SH3BP5
V$TCF11_01	MSigDB_C3	9	251	4.20019	2.02338	3.58566	1	2.37218	0.0260415	0.186219	+*	CHD2|GAB2|LMAN1|S1PR1|SMARCA2|STAT3|TCEB3|TLK1|UBE2E3|EXCLUDED_GENES:|CCND2
Human Lung_not_cancer_Golpon04_242genes (15284076-TableE2)	GeneSigDB	8	211	3.52941	1.85537	3.79147	1	2.40955	0.0261483	0.186875	+*	ANP32A|ANXA11|COPB2|GCDH|NDUFV2|PTPRJ|TCF4|UMPS
TIEN_INTESTINE_PROBIOTICS_24HR_UP	MSigDB_C2	16	557	9.31738	2.99696	2.87253	1	2.2298	0.0262351	0.187387	+*/+*	ATP13A3|C10ORF2|CCDC86|CYB5B|ENOSF1|FASTKD1|KIF14|KLHL21|MCM2|NDUFV2|PHACTR2|SUB1|TCF4|THYN1|TYMS|UMPS
JOHNSTONE_PARVB_TARGETS_2_DN	MSigDB_C2	11	335	5.60201	2.32965	3.28358	1	2.31708	0.0262745	0.18756	**/++	AKIRIN1|CDYL|CHD2|CHML|EPM2AIP1|POLR1C|RAP1GDS1|TBL1XR1|TNFAIP8|TRAM2|USP46
GOLGI_APPARATUS_PART	MSigDB_C5	5	100	1.67213	1.27818	5	1	2.6036	0.0264232	0.188296	+*	B4GALT1|CHST2|COPB2|LMAN1|RAB30
EIF4E_DN	MSigDB_C6	5	100	1.67362	1.28044	5	1	2.59784	0.0264232	0.188296	**/+*	CASP10|CLINT1|KLHL21|MAP3K5|SIK3
ZHANG_TLX_TARGETS_60HR_UP	MSigDB_C2	10	293	4.90234	2.18295	3.41297	1	2.33522	0.0264229	0.188296	++/+*	AEN|CFLAR|HIST1H1C|MSRB1|PARP3|SLC19A2|SP110|TGFBR2|TRAFD1|WDR6
Lymph_node_U133plus	SignatureDB	0	214	3.58026	1.8642	0	0	-1.92053	0.0266431	0.189754	-+
CATION_BINDING	MSigDB_C5	8	212	3.54472	1.85662	3.77358	1	2.39967	0.026794	0.190171	+*	FECH|GPD2|HSP90B1|LIMD1|MAN1A1|MSRB1|PIAS2|TESC|EXCLUDED_GENES:|PIM1
V$FOX_Q2	MSigDB_C3	8	212	3.54544	1.86009	3.77358	1	2.39481	0.026794	0.190171	++	ATXN7L1|C18ORF25|CNBP|PDCD4|SMARCA2|TET2|TGIF1|ZADH2|EXCLUDED_GENES:|CCND2
MORF_RBBP8	MSigDB_C4	8	212	3.54555	1.8604	3.77358	1	2.39436	0.026794	0.190171	+*	ANKRD12|BCL2|IKZF1|IQGAP2|LEPROTL1|PARVB|SIK3|ZBTB11
CACTGTG,MIR-128A,MIR-128B	MSigDB_C3	11	336	5.61533	2.33252	3.27381	1	2.30852	0.0267737	0.190171	+*	C16ORF5|C18ORF25|IGSF3|LBH|MTDH|SEC61A1|SH2D3C|SMARCA2|UBE2E3|UBE2W|ZADH2
SCHAEFFER_PROSTATE_DEVELOPMENT_48HR_DN	MSigDB_C2	13	423	7.0761	2.6148	3.07329	1	2.26553	0.0267378	0.190171	++/++	C16ORF5|CABLES1|CDKL1|CHDH|EPHB1|FNBP1L|LRRC33|PDCD4|PHACTR1|PRKCB|SLC19A2|TCF4|TGFBR2|EXCLUDED_GENES:|BLNK|BMF|FOXP1|SH3BP5
Human Leukemia_San Jose-Eneriz08_1151genes (18537972-TableS2)	GeneSigDB	25	987	16.504	3.9485	2.53293	1	2.1517	0.0267746	0.190171	++	ATXN7L1|C6ORF106|CD37|CFLAR|CNPY3|CXORF21|DNMT3A|ELL2|FASTKD1|GLO1|IGHM|KIAA0226L|KPTN|LPCAT4|NIPA2|OAS1|PARL|PHTF1|PTPN2|RAP1GDS1|SIK3|STAT3|SUB1|TCF4|TOR1AIP1
RAO_BOUND_BY_SALL4_ISOFORM_B	MSigDB_C2	15	513	8.58282	2.8712	2.92398	1	2.23502	0.0268671	0.190581	+*	ADAMTS6|ANXA11|ARHGEF3|BMPR2|CD47|CREB3L2|GABPB1|IVNS1ABP|MAP3K5|PDLIM1|TBL1XR1|TGIF1|TMEM39A|UBE2E3|UGCG|EXCLUDED_GENES:|ENTPD1
BURTON_ADIPOGENESIS_PEAK_AT_8HR	MSigDB_C2	3	39	0.651806	0.799248	7.69231	1	2.938	0.0272181	0.191642	+*	BCL3|CD44|PLAC8
Human Prostate_Wallace08_63genes (18245496-Table3)	GeneSigDB	3	39	0.651468	0.800264	7.69231	1	2.9347	0.0272181	0.191642	+*	CCR7|GPR183|IGHM
Human Breast_BernardPierrot_48genes (18757432-Table2b)	GeneSigDB	3	39	0.651927	0.800182	7.69231	1	2.93442	0.0272181	0.191642	+*	ANP32A|HIST1H1C|U2SURP
Mouse Lung_not_cancer_Vuillemenot04_40genes (12972399-Table2)	GeneSigDB	3	39	0.652827	0.800419	7.69231	1	2.93243	0.0272181	0.191642	+*	GAB1|TLE4|TUBB4A
GNF2_ICAM3	MSigDB_C4	3	39	0.652682	0.800715	7.69231	1	2.93153	0.0272181	0.191642	+*	ADAM8|GMFG|SLA
GNF2_PTPRC	MSigDB_C4	4	68	1.13757	1.05489	5.88235	1	2.71348	0.0271577	0.191642	+*	ADAM8|IL10RA|PION|RAC2
FONTAINE_FOLLICULAR_THYROID_ADENOMA_DN	MSigDB_C2	4	68	1.13886	1.05697	5.88235	1	2.70692	0.0271577	0.191642	+*/+*	CD47|IL2RA|MAN1A1|ZNF275
AKL_HTLV1_INFECTION_DN	MSigDB_C2	4	68	1.13931	1.05688	5.88235	1	2.70674	0.0271577	0.191642	**/++	IL17RB|MINA|PTPN2|TCTN3
GARGALOVIC_RESPONSE_TO_OXIDIZED_PHOSPHOLIPIDS_BLUE_UP	MSigDB_C2	6	136	2.27374	1.48946	4.41176	1	2.50176	0.0270576	0.191642	+*/**	FAM100B|KCTD5|KLHL21|PCYT1A|PNP|SLC19A2
CHYLA_CBFA2T3_TARGETS_UP	MSigDB_C2	12	380	6.35379	2.47989	3.15789	1	2.27679	0.0271629	0.191642	++/*+	ARHGEF3|CABLES1|CELF2|ELOVL7|ERN1|FKBP11|FNBP1L|GMFG|KLF8|PTPRJ|TET2|TNFAIP8|EXCLUDED_GENES:|CCND2
ZHOU_INFLAMMATORY_RESPONSE_LIVE_DN	MSigDB_C2	12	380	6.35581	2.48264	3.15789	1	2.27347	0.0271629	0.191642	*+/+*	ABHD10|ANP32A|DDI2|GYG1|KIAA0226L|LOC645638|METTL13|PLCL2|SLC25A30|SNX18|ST6GALNAC4|THYN1|EXCLUDED_GENES:|ENTPD1
RIGGI_EWING_SARCOMA_PROGENITOR_UP	MSigDB_C2	13	424	7.09061	2.61913	3.06604	1	2.25624	0.0271828	0.191642	++/*+	DUSP5|EPHB1|GPD2|HIST1H2AC|IGSF3|KIAA0226L|LBH|MAP3K5|PDLIM1|PRKCB|SMARCC1|TCF4|TOX2|EXCLUDED_GENES:|CCND2
ZHANG_BREAST_CANCER_PROGENITORS_UP	MSigDB_C2	13	424	7.09356	2.61898	3.06604	1	2.25524	0.0271828	0.191642	+*/+*	ARNT2|BCL2|ERCC6L2|HOOK1|IDH3A|MCM2|MTDH|MTHFD1|POLR1C|SMCHD1|TFRC|TOMM70A|WDR11
BOYLAN_MULTIPLE_MYELOMA_PCA1_UP	MSigDB_C2	5	101	1.69001	1.2861	4.9505	1	2.57367	0.027432	0.1926	++/**	ELL2|FAM46C|GPM6A|HOOK1|IGHM
Human Thyroid_Fontaine09_103genes (19893615-Table5)	GeneSigDB	5	101	1.68925	1.2866	4.9505	1	2.57326	0.027432	0.1926	+*	CASP10|DUSP5|ECI1|PDLIM1|TESC
BROWNE_HCMV_INFECTION_20HR_DN	MSigDB_C2	5	101	1.68959	1.28668	4.9505	1	2.57283	0.027432	0.1926	*+/++	ACPP|ATP13A3|MAP3K5|PDE4B|TRAM2
MODULE_261	MSigDB_C4	5	101	1.68894	1.28735	4.9505	1	2.572	0.027432	0.1926	+*	AEN|CD69|LBH|NFKBID|TLE4
WIELAND_UP_BY_HBV_INFECTION	MSigDB_C2	5	101	1.69166	1.28822	4.9505	1	2.56816	0.027432	0.1926	+*	IL10RA|PLAC8|RAC2|SP110|TYMS
MORF_DMPK	MSigDB_C4	7	174	2.91076	1.68684	4.02299	1	2.4242	0.0275049	0.193002	+*	CDYL|P2RY10|PHF16|SLC33A1|TLE1|TMEM184B|USP46
RICKMAN_TUMOR_DIFFERENTIATED_WELL_VS_POORLY_DN	MSigDB_C2	12	381	6.37466	2.48311	3.14961	1	2.26544	0.0276411	0.193799	++/++	CD44|COCH|CSNK1E|EHD1|ELL2|KCTD5|MSRB1|NABP1|OXSR1|PCYT1A|PHACTR2|PNP
Human Breast_Sotiriou03_706genes (12917485-Table8)	GeneSigDB	15	515	8.61398	2.87955	2.91262	1	2.21772	0.0276758	0.193799	++	ADRB2|BCL2|CCL18|CD44|CD69|DUSP5|MTHFD1|OAS1|PDCD4|PDE4B|S1PR1|STAT3|SUB1|TGFBR2|ZMYND11|EXCLUDED_GENES:|CCND2
GRAESSMANN_RESPONSE_TO_MC_AND_DOXORUBICIN_UP	MSigDB_C2	17	607	10.1444	3.11617	2.80066	1	2.2	0.0276751	0.193799	++/+*	ADAM8|ADRB2|ARMC7|CTR9|FA2H|FAM100B|MSRB1|PDLIM1|PNP|SH2D3C|SLC19A2|SLC33A1|SP110|ST6GALNAC4|THYN1|TMEM184B|TRAFD1|EXCLUDED_GENES:|PTPN1
LASTOWSKA_NEUROBLASTOMA_COPY_NUMBER_DN	MSigDB_C2	21	796	13.3098	3.55867	2.63819	1	2.16099	0.0276811	0.193799	**/+*	AKIRIN1|BBIP1|DDI2|EBNA1BP2|EPM2AIP1|GNL3|HPDL|LIMD1|NGLY1|OXSR1|PAK1|PDCD4|RAB30|RDX|SIK3|SMARCC1|STAMBPL1|TCEB3|THYN1|WDR11|WDR6
V$MYCMAX_01	MSigDB_C3	9	254	4.24727	2.03174	3.54331	1	2.33924	0.0278179	0.194536	+-	FKBP11|IQGAP2|IVNS1ABP|MANF|MAT2A|MTHFD1|TET2|TFRC|ZADH2
V$CREB_02	MSigDB_C3	9	254	4.24978	2.03289	3.54331	1	2.33668	0.0278179	0.194536	+*	AKIRIN1|C6ORF106|CHD2|ELL2|IVNS1ABP|KPTN|PAK1|TMEM39A|UMPS
XU_GH1_AUTOCRINE_TARGETS_DN	MSigDB_C2	6	137	2.29043	1.49777	4.37956	1	2.47673	0.0279138	0.195097	*+/++	B4GALT1|CD44|DBN1|HOOK1|NETO2|RAVER2|EXCLUDED_GENES:|FOXP1
RODRIGUES_THYROID_CARCINOMA_UP	MSigDB_C2	2	16	0.265905	0.510876	12.5	1	3.39436	0.0286852	0.19595	+*/*+	ECI1|FKBP11
RRNA_METABOLIC_PROCESS	MSigDB_C5	2	16	0.266779	0.511695	12.5	1	3.38721	0.0286852	0.19595	+*	NOLC1|RRP9
Human Ovarian_Horak05_31genes (15972852-Table1)	GeneSigDB	2	16	0.266854	0.511677	12.5	1	3.38719	0.0286852	0.19595	+*	BCL2|CFLAR
HYDROLASE_ACTIVITY_ACTING_ON_CARBON_NITROGEN_NOT_PEPTIDEBONDSIN_CYCLIC_AMIDINES	MSigDB_C5	2	16	0.266962	0.511923	12.5	1	3.38535	0.0286852	0.19595	+*	DCTD|MTHFD1
TONKS_TARGETS_OF_RUNX1_RUNX1T1_FUSION_GRANULOCYTE_DN	MSigDB_C2	2	16	0.266894	0.512164	12.5	1	3.38389	0.0286852	0.19595	*+/++	ADAM8|IL10RA|EXCLUDED_GENES:|ENTPD1
RNA_POLYMERASE_ACTIVITY	MSigDB_C5	2	16	0.266978	0.512204	12.5	1	3.38346	0.0286852	0.19595	+*	POLR1C|POLR3G
Human Lymphoma_Mahadevan05_21genes_B-non-Hodgkin'sLymphomavsNormalLymphnode (16373702-Table2b)	GeneSigDB	2	16	0.267036	0.512295	12.5	1	3.38275	0.0286852	0.19595	+*	CCL18|RAC2
MODULE_275	MSigDB_C4	2	16	0.267152	0.512359	12.5	1	3.3821	0.0286852	0.19595	+*	CD47|ITGAE
Tcell_cytokine_induced_IL2_IL7_IL15_IL4	SignatureDB	2	16	0.267243	0.512473	12.5	1	3.38117	0.0286852	0.19595	+*	BCL2|CD69
Human Leukemia_Hamamura07_17genes (17895889-Table1b)	GeneSigDB	2	16	0.267174	0.512557	12.5	1	3.38075	0.0286852	0.19595	+*	BCL2|TCF4
RAY_TARGETS_OF_P210_BCR_ABL_FUSION_DN	MSigDB_C2	2	16	0.267372	0.512606	12.5	1	3.38004	0.0286852	0.19595	**/+*	CYB5B|PAK1
Human Lymphoma_Huynh08_18genes (18464117-Table3)	GeneSigDB	2	16	0.267445	0.512596	12.5	1	3.37996	0.0286852	0.19595	+*	CD37|CD44
ER_NUCLEAR_SIGNALING_PATHWAY	MSigDB_C5	2	16	0.26763	0.512609	12.5	1	3.37951	0.0286852	0.19595	+*	ERN1|PAK1
ABDELMOHSEN_ELAVL4_TARGETS	MSigDB_C2	2	16	0.267863	0.512653	12.5	1	3.37877	0.0286852	0.19595	+*	BCL2|LEPROTL1
Human Breast_Modlich04_24genes (15475428-Table5)	GeneSigDB	2	16	0.268268	0.513181	12.5	1	3.37451	0.0286852	0.19595	+*	ANP32A|NDUFV2
GLYCOLIPID_METABOLIC_PROCESS	MSigDB_C5	2	16	0.267669	0.513395	12.5	1	3.37426	0.0286852	0.19595	+*	ST6GALNAC4|UGCG
Human Lymphoma_Mahadevan05_21genes_PTCL-NOSvsNormalLymphNode (16373702-Table1b)	GeneSigDB	2	16	0.268712	0.513175	12.5	1	3.37368	0.0286852	0.19595	+*	CCL18|RAC2
RESPONSE_TO_TEMPERATURE_STIMULUS	MSigDB_C5	2	16	0.268177	0.513703	12.5	1	3.37126	0.0286852	0.19595	+*	CSDA|GCLC
HAHTOLA_MYCOSIS_FUNGOIDES_DN	MSigDB_C2	2	16	0.268291	0.513701	12.5	1	3.37104	0.0286852	0.19595	**/+*	CD37|IKZF1
BIOCARTA_IL22BP_PATHWAY	MSigDB_C2	2	16	0.268702	0.51371	12.5	1	3.37019	0.0286852	0.19595	+*	IL10RA|STAT3
MODULE_203	MSigDB_C4	2	16	0.268761	0.514003	12.5	1	3.36815	0.0286852	0.19595	+*	HIST1H1C|HIST1H2AC
Human Brain-Glioblastoma multiforme_Zhao09_16genes (19199503-Table1)	GeneSigDB	2	16	0.268731	0.514234	12.5	1	3.36669	0.0286852	0.19595	+*	BCL2|PAK2
LYASE_ACTIVITY	MSigDB_C5	4	69	1.15198	1.06338	5.7971	1	2.67828	0.0284611	0.19595	+*	EHHADH|FECH|GLO1|UMPS
ZAMORA_NOS2_TARGETS_UP	MSigDB_C2	4	69	1.15264	1.06325	5.7971	1	2.67797	0.0284611	0.19595	+*/**	MCM2|PNP|STAM|TYMS
MODULE_493	MSigDB_C4	4	69	1.15425	1.06266	5.7971	1	2.67795	0.0284611	0.19595	++	ARNT2|EPHB1|TCF4|UBE2E3
RHODES_UNDIFFERENTIATED_CANCER	MSigDB_C2	4	69	1.15322	1.06397	5.7971	1	2.67562	0.0284611	0.19595	+*	KIF14|MCM2|SEC61B|TUBB4A
ZHANG_RESPONSE_TO_CANTHARIDIN_DN	MSigDB_C2	4	69	1.15402	1.06373	5.7971	1	2.67546	0.0284611	0.19595	+*/+*	GTF3A|IDH3A|MRPL3|MTHFD1
LIU_NASOPHARYNGEAL_CARCINOMA	MSigDB_C2	4	69	1.15501	1.06453	5.7971	1	2.67253	0.0284611	0.19595	+*	ADAM8|MAT2A|RAC2|TBL1XR1
BORCZUK_MALIGNANT_MESOTHELIOMA_DN	MSigDB_C2	5	102	1.70279	1.29015	4.90196	1	2.55569	0.0284649	0.19595	++/+*	B4GALT1|C11ORF80|CASP10|FAIM3|IGHM
MORF_RRM1	MSigDB_C4	5	102	1.70519	1.29232	4.90196	1	2.54953	0.0284649	0.19595	+*	ANP32A|MCM2|TARS|TOMM70A|TYMS
LABBE_TGFB1_TARGETS_UP	MSigDB_C2	5	102	1.70708	1.2934	4.90196	1	2.54593	0.0284649	0.19595	+*/**	B4GALT1|HIVEP1|LITAF|TCF4|TGIF1
ATAGGAA,MIR-202	MSigDB_C3	5	102	1.70737	1.29342	4.90196	1	2.54568	0.0284649	0.19595	++	BCL2|FAM46C|MARCKS|STAT3|TGFBR2
CASORELLI_ACUTE_PROMYELOCYTIC_LEUKEMIA_UP	MSigDB_C2	7	175	2.92668	1.68938	4	1	2.41113	0.0282562	0.19595	++/++	C7ORF23|CD44|FAIM3|GPR183|PLAGL1|SIK3|ST3GAL5
Human Thyroid_Fontaine09_220genes (19893615-Table3)	GeneSigDB	7	175	2.92867	1.68935	4	1	2.40999	0.0282562	0.19595	+*	B9D1|BATF|CARD11|CREB3L2|ECI1|PDLIM1|TESC
V$SP1_Q6	MSigDB_C3	9	255	4.26077	2.0359	3.52941	1	2.32783	0.0284285	0.19595	+*	ANP32A|BMPR2|CACNA1D|CTR9|PTPN2|RAP1GDS1|SH2D3C|SNX18|TCF4|EXCLUDED_GENES:|SH3BP5
V$PAX2_02	MSigDB_C3	9	255	4.26534	2.03813	3.52941	1	2.32304	0.0284285	0.19595	+*	ATXN7L1|CCL22|EIF4G1|EPHB1|LSG1|MARCKS|MEX3C|TCF4|ZBTB32
Blood_Module-3.4_Undetermined	SignatureDB	10	297	4.96569	2.19548	3.367	1	2.29304	0.0286323	0.19595	++	CELF2|CLINT1|HIVEP1|MEX3C|PDCD4|SCAPER|SMCHD1|STAM|U2SURP|ZBTB11
MODULE_37	MSigDB_C4	14	471	7.88132	2.75682	2.9724	1	2.21947	0.0282131	0.19595	++	C6ORF106|CELF2|CHD1|COCH|EPS15L1|LEPROTL1|LILRA4|MOCOS|PLEKHG1|PTPLA|SLAMF7|STAMBPL1|STAT3|UGCG
Human Viral_Cairo08_588genes (19061838-TableS3)	GeneSigDB	14	471	7.88158	2.75851	2.9724	1	2.21801	0.0282131	0.19595	++	C7ORF23|CHST7|CKAP4|CREB3L2|FNBP1L|GCDH|ITGAE|LPIN2|MAP3K5|MARCKS|PCK2|SLC27A5|SLC43A3|SMARCC1
Human Breast_Parker09_500genes_IntrinsicGenes_SorlieAnnot (19204204-SupplementaryTable9)	GeneSigDB	14	472	7.88977	2.75695	2.9661	1	2.2163	0.0286514	0.19595	++	C9ORF91|CCL18|CSDA|EBNA1BP2|FECH|FKBP11|FZD6|GYG1|HIST1H1C|NFKBIZ|NT5DC2|PDCD4|PEBP1|TLK1
REACTOME_ADAPTIVE_IMMUNE_SYSTEM	MSigDB_C2	15	517	8.6457	2.88773	2.90135	1	2.20045	0.0285025	0.19595	++	BTLA|CARD11|LILRB2|LYN|NFKBIB|PAK1|PAK2|PRKCB|RNF138|SEC13|SEC61A1|SEC61B|UBA5|UBE2E3|UBE2W|EXCLUDED_GENES:|BLNK
Human Immune_Kong10_43genes_ImmPort_InterleukinReceptors (20460173-ImmPortInterleukinReceptors)	GeneSigDB	3	40	0.669667	0.809311	7.5	1	2.8794	0.0290697	0.197812	+*	IL10RA|IL17RB|IL2RA
Human Leukemia_Davies03_41genes (12947006-Table2)	GeneSigDB	3	40	0.66883	0.809656	7.5	1	2.87921	0.0290697	0.197812	++	LITAF|MARCKS|RNASE6
TOMLINS_PROSTATE_CANCER_UP	MSigDB_C2	3	40	0.66822	0.810409	7.5	1	2.87729	0.0290697	0.197812	+*/**	CACNA1D|MANF|PPIB
ONO_AML1_TARGETS_DN	MSigDB_C2	3	40	0.668943	0.810609	7.5	1	2.87569	0.0290697	0.197812	**/++	CCR7|IL10|ITGAE|EXCLUDED_GENES:|IRF4
BENPORATH_ES_2	MSigDB_C2	3	40	0.669361	0.810807	7.5	1	2.87447	0.0290697	0.197812	+*	AEN|DNMT3A|RRP9
BERNARD_PPAPDC1B_TARGETS_UP	MSigDB_C2	3	40	0.669178	0.811073	7.5	1	2.87375	0.0290697	0.197812	+*/**	ANP32A|HIST1H1C|U2SURP
CHANGOLKAR_H2AFY_TARGETS_DN	MSigDB_C2	3	40	0.670335	0.811288	7.5	1	2.87156	0.0290697	0.197812	**/+*	CSDA|ELL2|TMEM39A
Mouse StemCell_Read09_438genes (19185848-TableS1)	GeneSigDB	10	298	4.98205	2.2035	3.3557	1	2.27727	0.0292046	0.19862	++	CD200|DBN1|GPM6A|GYG1|HIVEP1|HOOK1|PAK1|PRKCB|SH2D3C|TUBB4A|EXCLUDED_GENES:|SH3BP5
Human Immune_Allen10_106genes (20220088-SuppTable2a)	GeneSigDB	5	103	1.72077	1.29724	4.85437	1	2.52785	0.0295222	0.200011	+*	CCL22|CCR7|CD44|IL10|IL2RA
Human Brain_Beier07_117genes (17483311-SuppTable3)	GeneSigDB	5	103	1.72048	1.29829	4.85437	1	2.52602	0.0295222	0.200011	+*	COL9A3|FZD6|MINA|NFKBIZ|TLE1
Human Breast_Fan06_104genes (17178894-Table1)	GeneSigDB	5	103	1.72319	1.29863	4.85437	1	2.52329	0.0295222	0.200011	+*	ANXA11|BMPR2|DUSP5|TGFBR2|TNFAIP8
Human HeadandNeck_Cloos06_103genes (16513838-TableS2)	GeneSigDB	5	103	1.72286	1.29937	4.85437	1	2.5221	0.0295222	0.200011	++	EBNA1BP2|HOOK1|SLC33A1|SP100|STAM
Human Breast_Doane06_138genes (16491124-Table1)	GeneSigDB	5	103	1.72175	1.30051	4.85437	1	2.52074	0.0295222	0.200011	++	FA2H|MARCH3|PARVB|PDCD4|SIDT1
CTATGCA,MIR-153	MSigDB_C3	8	216	3.61382	1.87681	3.7037	1	2.33704	0.0294875	0.200011	++	BMPR2|CELF2|CKAP4|KCTD5|MAT2A|TGFBR2|UBE2W|ZNF385C
AMUNDSON_RESPONSE_TO_ARSENITE	MSigDB_C2	8	216	3.61437	1.87877	3.7037	1	2.33431	0.0294875	0.200011	+*	BCL3|CHD2|IL10RA|LYN|POLR1C|SH2D3C|ST3GAL5|TLE4
Human Breast_Turashvili07_171genes (17389037-Tab3)	GeneSigDB	6	139	2.32301	1.50663	4.31655	1	2.44055	0.0296796	0.200747	++	CSDA|CYB5R2|EPS15L1|MRPL3|PNP|VOPP1|EXCLUDED_GENES:|FUT8
GTTTGTT,MIR-495	MSigDB_C3	9	257	4.29653	2.04371	3.50195	1	2.30143	0.0296778	0.200747	++	C18ORF25|CDYL|CELF2|CSNK1E|CYB5B|EML4|GPM6A|MARCKS|SLC38A2
V$ATF4_Q2	MSigDB_C3	9	257	4.29833	2.04816	3.50195	1	2.29555	0.0296778	0.200747	+*	AKIRIN1|CHD2|CNBP|EIF4G1|LEPROTL1|NFKBID|PAK1|SLC38A2|TMEM39A|EXCLUDED_GENES:|BMF
KEGG_RENAL_CELL_CARCINOMA	MSigDB_C2	4	70	1.16967	1.06968	5.71429	1	2.64596	0.0298011	0.201129	+*	ARNT2|GAB1|PAK1|PAK2
DEPHOSPHORYLATION	MSigDB_C5	4	70	1.1707	1.07121	5.71429	1	2.64121	0.0298011	0.201129	+*	DUSP5|PTPLA|PTPN2|PTPRJ
GTATGAT,MIR-154,MIR-487	MSigDB_C3	4	70	1.17238	1.07119	5.71429	1	2.6397	0.0298011	0.201129	++	C6ORF106|DNMT3A|GPM6A|TMEM184B
PARENT_MTOR_SIGNALING_UP	MSigDB_C2	16	566	9.47214	3.01601	2.82686	1	2.1644	0.0297777	0.201129	++/**	AP3B1|ATXN7L1|CD44|CDK12|GCDH|HEATR6|MAP3K5|MSRB1|OAS1|PCK2|PDCD4|PECR|RDX|SMARCA2|SP110|TCF4
Human Leukemia_Haferlach09_500genes (19429869-TableS1)	GeneSigDB	11	342	5.72073	2.35387	3.21637	1	2.24281	0.0299139	0.20178	++	ARHGEF3|FZD6|HIST1H1C|HIST1H2AC|LPIN2|MAN1A1|MAP3K5|SIK3|SLAMF7|SUSD1|ZFAT
POSITIVE_REGULATION_OF_DEVELOPMENTAL_PROCESS	MSigDB_C5	8	217	3.62945	1.88208	3.68664	1	2.32219	0.0301889	0.203413	+*	BCL3|C16ORF5|CASP10|CFLAR|ERN1|IL12A|MAP3K5|PLAGL1
CHANDRAN_METASTASIS_UP	MSigDB_C2	8	217	3.63269	1.8811	3.68664	1	2.32167	0.0301889	0.203413	+*/*+	C11ORF80|EML4|LIMD1|LYN|MINA|TARS|U2SURP|WDFY1
V$AMEF2_Q6	MSigDB_C3	9	258	4.31374	2.04795	3.48837	1	2.28827	0.0303167	0.204163	+*	AFF3|B4GALT1|C18ORF25|CHD2|LYN|P2RX5|PDLIM1|S1PR1|XK
NFkB_ChIPCHIP_Young_all	SignatureDB	11	343	5.73825	2.35673	3.207	1	2.23265	0.0304618	0.205029	+*	CD37|CD69|HSP90B1|IVNS1ABP|NFKBIB|NOC3L|NOLC1|POLR1C|RAB7L1|RAC2|ZBTB11
MAPKKK_CASCADE_GO_0000165	MSigDB_C5	5	104	1.73733	1.3033	4.80769	1	2.5034	0.030604	0.20565	+*	ADRB2|MAP3K5|MAPKAPK2|PAK1|SH2D3C
Human StemCell_Korkola05_146genes (15870693-SuppTable1)	GeneSigDB	5	104	1.74076	1.30522	4.80769	1	2.49709	0.030604	0.20565	+*	COCH|EHHADH|LEPREL1|PTPLA|SMARCA2
WOO_LIVER_CANCER_RECURRENCE_UP	MSigDB_C2	5	104	1.74098	1.30538	4.80769	1	2.49661	0.030604	0.20565	++/**	BCL2|DBN1|HK2|MARCKS|PLAGL1|EXCLUDED_GENES:|CCND2
LINDGREN_BLADDER_CANCER_CLUSTER_2B	MSigDB_C2	12	387	6.47247	2.5027	3.10078	1	2.20863	0.0306398	0.205779	++	CELF2|DUSP5|FAM46C|IL10RA|IQGAP2|LBH|NFKBIZ|PIM2|RAC2|RNASE6|SLC43A3|TCF4|EXCLUDED_GENES:|ENTPD1|IL16
LOPEZ_MBD_TARGETS	MSigDB_C2	24	951	15.9075	3.87963	2.52366	1	2.0859	0.0307061	0.206112	+*	ANXA11|BPGM|CNBP|CNTNAP1|COPB2|CSDA|EBNA1BP2|EPS15L1|FNDC3A|FTSJ1|GLO1|HIST1H1C|LITAF|MAT2A|NDUFV2|NOSIP|PKN3|PPIB|SEC61A1|SEC61B|SLC43A3|SUB1|TGIF1|UCK2
Dendritic_cell_CD16pos_blood	SignatureDB	3	41	0.685488	0.819254	7.31707	1	2.82515	0.0309864	0.206537	+*	MARCKS|SLA|ULK2
Human Leukemia_Wilson06_50genes_DifferentialClusterF (16597596-TableS1-6)	GeneSigDB	3	41	0.685384	0.819814	7.31707	1	2.82334	0.0309864	0.206537	++	HCK|LILRA6|LILRB2|EXCLUDED_GENES:|CCND2|ENTPD1
KUROKAWA_LIVER_CANCER_CHEMOTHERAPY_DN	MSigDB_C2	3	41	0.685739	0.819757	7.31707	1	2.82311	0.0309864	0.206537	**/+*	HK2|PDCD4|TESC
KAAB_FAILED_HEART_VENTRICLE_DN	MSigDB_C2	3	41	0.685383	0.820701	7.31707	1	2.82029	0.0309864	0.206537	+*	GTF3A|LPCAT4|STAT3
GNF2_FOS	MSigDB_C4	3	41	0.686069	0.820559	7.31707	1	2.81994	0.0309864	0.206537	+*	LILRA6|LILRB2|PLBD1
Mouse Testicular_Cederroth07_63genes (17673513-Table1)	GeneSigDB	3	41	0.685577	0.820963	7.31707	1	2.81916	0.0309864	0.206537	++	CD44|CHDH|IVNS1ABP
WEINMANN_ADAPTATION_TO_HYPOXIA_DN	MSigDB_C2	3	41	0.686416	0.821186	7.31707	1	2.81737	0.0309864	0.206537	*+/++	ANP32A|MARCKS|UGCG
Human Breast_Gyoerffy05_70genes (16044152-SuppTable3)	GeneSigDB	3	41	0.686329	0.821529	7.31707	1	2.8163	0.0309864	0.206537	+*	PHACTR2|SLC33A1|TSHZ1
ENDOMEMBRANE_SYSTEM	MSigDB_C5	8	218	3.64568	1.8829	3.66972	1	2.31256	0.0309018	0.206537	+*	ALG3|BCL2|COPB2|ERN1|HSP90B1|LMAN1|SLC33A1|SP140
V$CP2_01	MSigDB_C3	9	259	4.33027	2.05178	3.4749	1	2.27594	0.0309651	0.206537	+*	CREB3L2|DCAF17|METTL8|NFKBIZ|PAK2|PHF16|RAB30|SMARCA2|TGIF1|EXCLUDED_GENES:|BMF
V$POU3F2_02	MSigDB_C3	9	259	4.32857	2.05291	3.4749	1	2.27551	0.0309651	0.206537	+*	ANP32A|BMPR2|CABLES1|CHST7|DUSP5|HIST1H2AC|HIST1H2BB|SMARCA2|ZADH2|EXCLUDED_GENES:|FOXP1
V$AR_Q6	MSigDB_C3	9	259	4.33054	2.05413	3.4749	1	2.2732	0.0309651	0.206537	+*	ACSM3|FA2H|FAM100B|IL2RA|MANF|NOC3L|SH2D3C|SIK3|TLK1
V$CEBPB_01	MSigDB_C3	9	259	4.33204	2.05442	3.4749	1	2.27215	0.0309651	0.206537	+*	ADRB2|AFF3|CHD2|CSNK1E|GYG1|IL10|MARCKS|SMC6|SPIB|EXCLUDED_GENES:|BMF|FOXP1|PIM1
GU_PDEF_TARGETS_UP	MSigDB_C2	4	71	1.18636	1.07967	5.6338	1	2.60601	0.0311778	0.207589	++/**	DOCK10|MAPKAPK2|RAC2|TCF4
HUANG_GATA2_TARGETS_DN	MSigDB_C2	4	71	1.18773	1.07949	5.6338	1	2.6052	0.0311778	0.207589	+*/+*	DCTD|HK2|PDCD4|TFRC
Human Breast_Mazurek05_187genes (16322222-SuppTable2)	GeneSigDB	7	179	2.99202	1.70736	3.91061	1	2.34747	0.0314004	0.208622	++	COCH|GMFG|KCTD5|MAN1A1|PLBD1|SLC27A5|SLC43A3
MODULE_126	MSigDB_C4	7	179	2.99445	1.70821	3.91061	1	2.34488	0.0314004	0.208622	+*	MNDA|NOLC1|PRKCB|SELRC1|SIDT1|SLC43A3|UMPS
Human Lymphoma_Wouters07_223genes (17671232-TableS2a)	GeneSigDB	7	179	2.99432	1.7098	3.91061	1	2.34278	0.0314004	0.208622	++	ARHGEF3|BCL2|CSNK1E|LEPROTL1|PHACTR2|PHF16|TRAM2
BENPORATH_NOS_TARGETS	MSigDB_C2	7	179	2.99366	1.71019	3.91061	1	2.34263	0.0314004	0.208622	++	CABLES1|CDYL|GNPTAB|POLR3G|PTPN2|STAT3|TBL1XR1
KRAS.BREAST_UP.V1_UP	MSigDB_C6	6	141	2.35944	1.52161	4.25532	1	2.39257	0.0315171	0.20922	+*/*+	ACPP|CCL22|COL9A3|CYB5R2|IL17RB|LILRA6
GTGCCAA,MIR-96	MSigDB_C3	10	302	5.05249	2.21405	3.31126	1	2.2346	0.031575	0.20922	++	ARHGAP24|CELF2|CREB3L2|GPM6A|NABP1|OXSR1|PAK1|PLAGL1|RNF183|UCK2|EXCLUDED_GENES:|SH3BP5
Human Breast_Creighton08_453genes (18794137-SuppTable1d)	GeneSigDB	10	302	5.05092	2.21521	3.31126	1	2.23414	0.031575	0.20922	++	BBIP1|BCL2|CSDA|FAIM3|IL17RB|PDCD4|PDLIM1|RNF183|SIK3|SLC19A2|EXCLUDED_GENES:|SH3BP5
Human Immune_Kong10_308genes_ImmPort_CytokineReceptors (20460173-ImmPortCytokineReceptors)	GeneSigDB	10	302	5.05477	2.21736	3.31126	1	2.23023	0.031575	0.20922	+*	ADRB2|BMPR2|CCR10|CCR7|IL10RA|IL17RB|IL2RA|S1PR1|TGFBR2|TNFRSF13B
Human StemCell_Kocer08_575genes (18667080-TableS9)	GeneSigDB	15	524	8.76042	2.90286	2.8626	1	2.14946	0.0315399	0.20922	++	CD200|CD47|CELF2|DOCK10|ENOSF1|EPS15L1|KIF14|NDUFV2|RDX|SMARCA2|TARS|TLE4|TM2D3|TUBB4A|TYMS|EXCLUDED_GENES:|SH3BP5
V$HNF3B_01	MSigDB_C3	8	219	3.65932	1.88948	3.65297	1	2.29728	0.0316261	0.209223	++	AFF3|CHN2|EPHB1|GPM6A|NOC3L|PDCD4|TLE4|ZADH2|EXCLUDED_GENES:|FUT8
VANOEVELEN_MYOGENESIS_SIN3A_TARGETS	MSigDB_C2	8	219	3.66437	1.89005	3.65297	1	2.29392	0.0316261	0.209223	+*	DCTD|GNPTAB|HSP90B1|IDH3A|MINA|PMM2|SCAMP2|SELRC1|EXCLUDED_GENES:|PTPN1
Monocyte_4x_U133plus	SignatureDB	9	260	4.3512	2.05598	3.46154	1	2.26111	0.0316231	0.209223	+*	ATP13A3|CKAP4|ELOVL7|HCK|LILRA2|LILRA3|LILRB2|MARCKS|PLBD1
REACTOME_SIGNALING_BY_ILS	MSigDB_C2	5	105	1.75591	1.31145	4.7619	1	2.47367	0.0317103	0.209444	+*	GAB2|HCK|IL2RA|LYN|STAT3|EXCLUDED_GENES:|BLNK
KEEN_RESPONSE_TO_ROSIGLITAZONE_DN	MSigDB_C2	5	105	1.75697	1.31289	4.7619	1	2.47014	0.0317103	0.209444	**/++	BPGM|GMFG|LITAF|MSRB1|NFKBIZ
MORF_RAD54L	MSigDB_C4	5	105	1.75941	1.31259	4.7619	1	2.46885	0.0317103	0.209444	+*	ALG3|ARID3A|IDH3A|MCM2|TARS
Human Leukemia_Kang09_23genes (19880498-TableS5)	GeneSigDB	2	17	0.2832	0.528053	11.7647	1	3.25119	0.0321562	0.210479	++	PARP15|SOGA2|EXCLUDED_GENES:|IRF4
Mouse StemCell_Forsberg05_25genes (16151515-TableS5)	GeneSigDB	2	17	0.284275	0.527933	11.7647	1	3.24989	0.0321562	0.210479	+*	CCR7|MPEG1|EXCLUDED_GENES:|BLNK
Human Lymphoma_Cassinelli09_26genes (19555670-Table1a)	GeneSigDB	2	17	0.283754	0.52835	11.7647	1	3.24831	0.0321562	0.210479	+*	COL9A3|HIST1H2AC
LE_SKI_TARGETS_UP	MSigDB_C2	2	17	0.28365	0.528465	11.7647	1	3.2478	0.0321562	0.210479	+*/**	ADAMTS6|CD44
Human Leukemia_Li07_18genes (17313671-SuppTable1c)	GeneSigDB	2	17	0.284671	0.5282	11.7647	1	3.2475	0.0321562	0.210479	+*	LYN|TGFBR2|EXCLUDED_GENES:|FUT8
SCHWAB_TARGETS_OF_BMYB_POLYMORPHIC_VARIANTS_DN	MSigDB_C2	2	17	0.284175	0.528541	11.7647	1	3.24634	0.0321562	0.210479	**/+*	BCL3|NEK3
REACTOME_REGULATION_OF_SIGNALING_BY_CBL	MSigDB_C2	2	17	0.284709	0.528473	11.7647	1	3.24575	0.0321562	0.210479	+*	HCK|LYN|EXCLUDED_GENES:|BLNK
MODULE_90	MSigDB_C4	2	17	0.284365	0.528598	11.7647	1	3.24563	0.0321562	0.210479	+*	HIST1H1C|HIST1H2AC
KEGG_ONE_CARBON_POOL_BY_FOLATE	MSigDB_C2	2	17	0.284421	0.528632	11.7647	1	3.24532	0.0321562	0.210479	+*	MTHFD1|TYMS
Human Lymphoma_Cassinelli09_24genes (19555670-Table2a)	GeneSigDB	2	17	0.28518	0.528939	11.7647	1	3.242	0.0321562	0.210479	+*	HIST1H1C|HIST1H2AC
Human StemCell_Wagner04_18genes (15090461-Table4)	GeneSigDB	2	17	0.284763	0.529291	11.7647	1	3.24063	0.0321562	0.210479	+*	CHST2|XK
Human LungNotCaner_Kent08 (18358739-Table2)	GeneSigDB	2	17	0.284783	0.52942	11.7647	1	3.2398	0.0321562	0.210479	+*	IL10|IL10RA
chr12q	MSigDB_C1	2	17	0.284729	0.529521	11.7647	1	3.23929	0.0321562	0.210479	+*	SLC38A2|TRAFD1
Human Lymphoma_Tracey03_27genes (12689942-Table1)	GeneSigDB	2	17	0.285245	0.529733	11.7647	1	3.23702	0.0321562	0.210479	+*	HCK|LYN
MASSARWEH_TAMOXIFEN_RESISTANCE_UP	MSigDB_C2	16	571	9.55548	3.03209	2.8021	1	2.12544	0.0318928	0.210479	++/*+	B4GALT1|CREB3L2|CSNK1E|ELL2|FAM108C1|FECH|GAB1|HIST1H1C|IGSF3|IQGAP2|LITAF|PLBD1|PTPRJ|TMEM39A|TRAM2|XK|EXCLUDED_GENES:|BLNK
Human Bladder_Buytaert08_832genes (17952126-SuppTable1)	GeneSigDB	21	809	13.5307	3.58685	2.5958	1	2.08242	0.0321452	0.210479	++	ANKRD12|ARHGEF3|ARID3B|BPGM|C6ORF106|CDYL|DUSP5|FA2H|GCLC|HIST1H2AC|HIVEP1|PDCD4|PLK3|RAB7L1|SIK3|SLC33A1|SLC38A2|STAM|TLE1|TMEM39A|UGCG|EXCLUDED_GENES:|PIM1
Human Intestine_Jinawath04_1553genes (15273739-SuppTable2)	GeneSigDB	29	1204	20.1389	4.33598	2.40864	1	2.04362	0.0320351	0.210479	++	ACTR8|ASPHD2|CCR7|CDK12|CELF2|CFLAR|CKAP4|COPB2|EHD1|ENOSF1|FAM46C|IGHM|LILRA3|MANF|MARCKS|PAK1|PCYT1A|PDCD4|PLAC8|PTPRJ|RASGRF1|RDX|S1PR1|SCAMP2|SP100|STAT3|UGCG|XK|ZADH2|EXCLUDED_GENES:|BLNK|CCND2
MORF_GNB1	MSigDB_C4	10	303	5.06813	2.22056	3.30033	1	2.221	0.0321881	0.210576	+*	ANP32A|C19ORF10|DCTD|ERP29|MCM2|MTDH|SMARCC1|TARS|TOMM70A|TYMS
RNGTGGGC_UNKNOWN	MSigDB_C3	20	761	12.7315	3.48397	2.62812	1	2.08627	0.032222	0.210686	++	ATXN7L1|B4GALT1|BMPR2|CKAP4|COL9A3|CREB3L2|DNMT3A|EPHB1|IL2RA|NT5DC2|PHF16|PIM2|PRKCB|S1PR1|SIK3|SPIB|TET2|TLE4|XK|ZADH2|EXCLUDED_GENES:|CCND2|FOXP1
MEMBRANE_PART	MSigDB_C5	38	1665	27.8372	5.05731	2.28228	1	2.00953	0.0323096	0.211147	+*	ADAM8|ADRB2|ALG3|ATP1B3|B4GALT1|BCL2|BMPR2|CACNA1D|CARD11|CCR10|CCR7|CD200|CD37|CD47|CD69|CHST7|CKAP4|CNTNAP1|COPB2|EPHB1|ERN1|FZD6|GPR183|HSP90B1|IL17RB|ITGAE|KCNA3|LILRB2|LMAN1|LYN|P2RX5|PTPRJ|SLC33A1|ST3GAL5|TFRC|TGFBR2|TNFRSF13B|XK|EXCLUDED_GENES:|ENTPD1
Mouse Breast_Crawford07_758genes (18081427-TableS7)	GeneSigDB	14	480	8.02715	2.7824	2.91667	1	2.14665	0.03234	0.211234	+*	ABCE1|BPGM|CHDH|CYB5B|DCTD|ELOVL7|FASTKD1|FKBP11|GPD2|LEPROTL1|MINA|SACS|SEC13|TFRC
PLASMA_MEMBRANE_PART	MSigDB_C5	28	1155	19.3131	4.25587	2.42424	1	2.04115	0.032405	0.211547	++	ADAM8|ADRB2|ATP1B3|B4GALT1|BMPR2|CACNA1D|CARD11|CCR10|CCR7|CD200|CD37|CD47|CD69|CNTNAP1|EPHB1|FZD6|GPR183|IL17RB|ITGAE|KCNA3|LILRB2|LYN|P2RX5|PTPRJ|SLC33A1|ST3GAL5|TFRC|TNFRSF13B|EXCLUDED_GENES:|ENTPD1
Human Breast_Parker09_161genes_IntrinsicGenes_RTPCR (19204204-SupplementaryTable4)	GeneSigDB	6	142	2.37769	1.52401	4.22535	1	2.37683	0.032463	0.211814	+*	AVEN|BCL2|CFLAR|CSDA|KIF13B|TYMS
HOFFMANN_LARGE_TO_SMALL_PRE_BII_LYMPHOCYTE_DN	MSigDB_C2	4	72	1.2026	1.08459	5.55556	1	2.57921	0.0325914	0.21187	**/+*	BCL3|HCK|NFKBIZ|PIM2
DOANE_BREAST_CANCER_CLASSES_UP	MSigDB_C2	4	72	1.20322	1.08529	5.55556	1	2.57699	0.0325914	0.21187	++/**	CDK12|FA2H|PDCD4|SIDT1
GAURNIER_PSMD4_TARGETS	MSigDB_C2	4	72	1.20469	1.08592	5.55556	1	2.57414	0.0325914	0.21187	+*	CCL18|CCR10|CCR7|IL10|EXCLUDED_GENES:|IL16
WATTEL_AUTONOMOUS_THYROID_ADENOMA_UP	MSigDB_C2	4	72	1.20579	1.08598	5.55556	1	2.57298	0.0325914	0.21187	+*/**	CACNA1D|CCL18|DBN1|PRKCB|EXCLUDED_GENES:|ENTPD1
KEGG_LEISHMANIA_INFECTION	MSigDB_C2	4	72	1.20518	1.08626	5.55556	1	2.57289	0.0325914	0.21187	+*	IL10|IL12A|NFKBIB|PRKCB
BURTON_ADIPOGENESIS_2	MSigDB_C2	4	72	1.2045	1.08689	5.55556	1	2.57201	0.0325914	0.21187	++	GNPTAB|GRWD1|IVNS1ABP|TLE1
BUYTAERT_PHOTODYNAMIC_THERAPY_STRESS_UP	MSigDB_C2	21	810	13.5511	3.58868	2.59259	1	2.07568	0.0325098	0.21187	++/++	ANKRD12|ARHGEF3|ARID3B|BPGM|C6ORF106|CDYL|DUSP5|FA2H|GCLC|HIST1H2AC|HIVEP1|PDCD4|PLK3|RAB7L1|SIK3|SLC33A1|SLC38A2|STAM|TLE1|TMEM39A|UGCG|EXCLUDED_GENES:|PIM1
HAN_SATB1_TARGETS_UP	MSigDB_C2	12	391	6.54251	2.51728	3.06905	1	2.16801	0.0327648	0.212885	++/*+	CHML|GMFG|GRWD1|HIST1H2AC|METTL13|OAS1|PDE4B|PION|POLR1C|SLC33A1|TCF4|TOX2|EXCLUDED_GENES:|FUT8
CHEN_LVAD_SUPPORT_OF_FAILING_HEART_DN	MSigDB_C2	3	42	0.7017	0.829137	7.14286	1	2.77192	0.0329678	0.212977	*+/+*	LEPROTL1|MARCKS|PDE4B
Mouse Liver_Jeong06_43genes (16423883-Table2)	GeneSigDB	3	42	0.701601	0.82962	7.14286	1	2.77042	0.0329678	0.212977	+*	BPGM|GYG1|PMM2
Human Breast_Lombaerts06_43genes_TGBFb (16495925-Table3)	GeneSigDB	3	42	0.702081	0.830189	7.14286	1	2.76795	0.0329678	0.212977	++	CD44|RAC2|TGFBR2
SCHLINGEMANN_SKIN_CARCINOGENESIS_TPA_UP	MSigDB_C2	3	42	0.702295	0.830365	7.14286	1	2.7671	0.0329678	0.212977	+*/*+	MAT2A|NABP1|PLBD1
Human Leukemia_Wilson06_50genes_SigDifferentialClusterC (16597596-TableS1-3)	GeneSigDB	3	42	0.703203	0.830735	7.14286	1	2.76478	0.0329678	0.212977	+*	IL10RA|LILRA4|SP100|EXCLUDED_GENES:|IRF4
NUCLEOTIDE_METABOLIC_PROCESS	MSigDB_C5	3	42	0.703539	0.830891	7.14286	1	2.76385	0.0329678	0.212977	+*	DCTD|TYMS|UMPS
KEGG_FATTY_ACID_METABOLISM	MSigDB_C2	3	42	0.703056	0.831395	7.14286	1	2.76276	0.0329678	0.212977	+*	ECI1|EHHADH|GCDH
Human ProteinKinases_Frevel03_112genes (12509443-Table1)	GeneSigDB	5	106	1.76863	1.31555	4.71698	1	2.45629	0.0328414	0.212977	++	BCL2|KCNA3|PDE4B|PHACTR2|PLK3|EXCLUDED_GENES:|PIM1|PTPN1
Human Lung_not_cancer_Lockstone10_123genes (20194811-SuppTable1)	GeneSigDB	5	106	1.77293	1.31693	4.71698	1	2.45045	0.0328414	0.212977	+*	ASPHD2|FGD2|KCTD5|PLK3|RNASE6|EXCLUDED_GENES:|PIM1
Human Esophagus_Joshi06_129genes (16818663-Table3)	GeneSigDB	5	106	1.77388	1.31732	4.71698	1	2.44901	0.0328414	0.212977	++	EPHB1|IKZF1|RDX|TUBB4A|UMPS
V$NFKB_C	MSigDB_C3	9	262	4.38004	2.0633	3.43511	1	2.23911	0.0329682	0.212977	+*	ANP32A|BCL3|CCL22|CXORF21|IER5|IL2RA|NFKBIB|PTPRJ|ZADH2|EXCLUDED_GENES:|BMF
Human Colon_Arango04_254genes (15545975-Table1)	GeneSigDB	7	181	3.02398	1.7181	3.8674	1	2.3142	0.0330571	0.213328	+*	AVEN|GCLC|HCK|HIST1H2AC|RAC2|RNASE6|SLC33A1
GRAHAM_CML_DIVIDING_VS_NORMAL_QUIESCENT_UP	MSigDB_C2	7	181	3.02836	1.71937	3.8674	1	2.30994	0.0330571	0.213328	+*/++	HIST1H1C|MCM2|NT5DC2|PDLIM1|SUB1|TYMS|XK
Human Lung_not_cancer_Temple01_4genes (11694447-Table1)	GeneSigDB	1	2	0.033131	0.180409	50	1	5.35932	0.0331714	0.213731	+*	DUSP5|EXCLUDED_GENES:|PIM1
chr18p	MSigDB_C1	1	2	0.033367	0.181118	50	1	5.33704	0.0331714	0.213731	+*	LPIN2
Human Leukemia_Lin06_02genes (16780769-Table2)	GeneSigDB	1	2	0.033517	0.181647	50	1	5.32067	0.0331714	0.213731	+*	FAIM3
SCHAEFFER_PROSTATE_DEVELOPMENT_48HR_UP	MSigDB_C2	14	482	8.05996	2.78809	2.90456	1	2.1305	0.0333137	0.214536	++/++	ACSM3|B4GALT1|BCL2|BSPRY|C5ORF30|COL9A3|ERP29|GCLC|LEPROTL1|MANF|PLAC8|SLC25A30|TESC|TLE1
MODULE_205	MSigDB_C4	10	305	5.09983	2.22354	3.27869	1	2.20377	0.0334395	0.215234	+*	ARID3A|ARMC7|ASPHD2|B9D1|CHML|GPD2|KIF14|TUBB4A|WDR11|XK
V$SOX5_01	MSigDB_C3	9	263	4.39833	2.0681	3.42205	1	2.22507	0.0336554	0.216399	++	ADRB2|DUSP5|EML4|EPHB1|PAK1|TBL1XR1|TCF4|TUBB4A|ZADH2|EXCLUDED_GENES:|PIM1
DURCHDEWALD_SKIN_CARCINOGENESIS_DN	MSigDB_C2	9	263	4.39851	2.06966	3.42205	1	2.2233	0.0336554	0.216399	**/++	ARID3A|ATP13A3|B4GALT1|CD44|ELL2|HOOK1|PAK1|UCK2|UGCG
DITTMER_PTHLH_TARGETS_DN	MSigDB_C2	4	73	1.21673	1.09286	5.47945	1	2.54677	0.034042	0.216855	++/++	EIF4G1|IVNS1ABP|SP110|TOMM70A
Human Colon_Craene05_85genes (16024625-Table1)	GeneSigDB	4	73	1.22117	1.09417	5.47945	1	2.53967	0.034042	0.216855	+*	DUSP5|HK2|HOOK1|OAS1|EXCLUDED_GENES:|PIM1
BILANGES_RAPAMYCIN_SENSITIVE_VIA_TSC1_AND_TSC2	MSigDB_C2	4	73	1.22205	1.0941	5.47945	1	2.53903	0.034042	0.216855	+*	GYG1|POLR1C|PPIB|TUBB4A
DARWICHE_PAPILLOMA_PROGRESSION_RISK	MSigDB_C2	4	73	1.22125	1.09453	5.47945	1	2.53875	0.034042	0.216855	+*	AFF3|LAG3|UCK2|ZSCAN2
Human Leukemia_Raponi08_93genes (18160667-TableS4)	GeneSigDB	4	73	1.22172	1.09464	5.47945	1	2.53809	0.034042	0.216855	+*	EML4|S1PR1|TCF4|UGCG
MORF_CDC16	MSigDB_C4	4	73	1.22214	1.09493	5.47945	1	2.53703	0.034042	0.216855	+*	ANP32A|DCTD|SMARCC1|TOMM70A
MOREAUX_B_LYMPHOCYTE_MATURATION_BY_TACI_DN	MSigDB_C2	4	73	1.2223	1.09493	5.47945	1	2.53687	0.034042	0.216855	**/+*	EBNA1BP2|MCM2|THYN1|TYMS
KEGG_T_CELL_RECEPTOR_SIGNALING_PATHWAY	MSigDB_C2	5	107	1.78863	1.32195	4.6729	1	2.42927	0.0339973	0.216855	+*	CARD11|IL10|NFKBIB|PAK1|PAK2
SESTO_RESPONSE_TO_UV_C0	MSigDB_C2	5	107	1.78936	1.32239	4.6729	1	2.42791	0.0339973	0.216855	+*	BPGM|CNBP|CTR9|PNP|TFRC
CTGTTAC,MIR-194	MSigDB_C3	5	107	1.78848	1.32509	4.6729	1	2.42363	0.0339973	0.216855	+*	C18ORF25|CHD1|DNMT3A|GYG1|TGIF1
ZHONG_RESPONSE_TO_AZACITIDINE_AND_TSA_UP	MSigDB_C2	7	182	3.04138	1.72398	3.84615	1	2.29621	0.033907	0.216855	++/**	BMPR2|C6ORF106|EHD1|GAB2|HIST1H1C|PLK3|STAT3
AKT_UP_MTOR_DN.V1_DN	MSigDB_C6	7	182	3.04363	1.72605	3.84615	1	2.29215	0.033907	0.216855	+*/++	CD200|CHN2|FKBP11|LIMD1|MOCOS|MTHFD1|SPATA5
KYNG_DNA_DAMAGE_UP	MSigDB_C2	8	222	3.71192	1.9021	3.6036	1	2.25439	0.0338685	0.216855	+*/++	ARNT2|DCTD|DUSP5|EML4|GCLC|KIF14|SP140|STAT3|EXCLUDED_GENES:|ENTPD1|IL16
TAATAAT,MIR-126	MSigDB_C3	8	222	3.7148	1.90085	3.6036	1	2.25436	0.0338685	0.216855	+*	AP3B1|CELF2|FNDC3A|GMPPB|MAN1A1|MARCH3|RNF138|TSHZ1
Mouse Skin_Driskell09_685genes (19605494-TableS3)	GeneSigDB	13	438	7.32506	2.66015	2.96804	1	2.13332	0.0339974	0.216855	++	ANKRD12|BTLA|CELF2|COCH|ELOVL7|GPR183|MPEG1|NT5DC2|PHACTR1|POLR3G|S1PR1|SACS|TESC
WONG_ADULT_TISSUE_STEM_MODULE	MSigDB_C2	19	717	11.9892	3.38164	2.64993	1	2.07319	0.0337559	0.216855	++	ADRB2|CD200|COL9A3|ELL2|GPX7|IL2RA|ITGAE|MAN1A1|MARCKS|MCOLN2|NFKBIZ|PCK2|PRKCB|SIK3|SMARCA2|TCF4|TLE1|ZMYND11|ZNF275|EXCLUDED_GENES:|ENTPD1|FOXP1
MARTINEZ_RB1_TARGETS_UP	MSigDB_C2	18	670	11.2095	3.27563	2.68657	1	2.07305	0.0340317	0.216855	++/*+	ABCE1|CD44|CELF2|CTR9|EIF4G1|FECH|GCLC|GLO1|IKZF1|LMAN1|MAP3K5|MRPL3|NABP1|PCYT1A|SLC25A30|TFRC|TGFBR2|ZMYND11|EXCLUDED_GENES:|CCND2|FOXP1
chr21q22	MSigDB_C1	0	200	3.34658	1.80535	0	0	-1.8537	0.033807	0.216855	-+
Human Leukemia_Falini10_400genes_Top400NPM1 (20203266-TableS1b)	GeneSigDB	10	306	5.1213	2.22947	3.26797	1	2.18828	0.0340778	0.216972	+*	ABCE1|AVEN|C1ORF186|CACNA1D|FAM129C|HIST1H2AC|HIVEP1|MAN1A1|UCK2|ZNF614
V$MEF2_01	MSigDB_C3	6	144	2.40729	1.53524	4.16667	1	2.34016	0.0344098	0.218861	++	AICDA|ANP32A|EPHB1|LYN|S1PR1|SMARCA2
Human Breast_Dairkee04_202genes (15260889-TableS2b)	GeneSigDB	6	144	2.41157	1.536	4.16667	1	2.33621	0.0344098	0.218861	++	KIF13B|LBH|RAB30|S1PR1|TCEB3|TGFBR2|EXCLUDED_GENES:|FOXP1
PEREZ_TP63_TARGETS	MSigDB_C2	11	350	5.85616	2.38216	3.14286	1	2.15931	0.0344996	0.219319	+*	CELF2|CHST2|COL9A3|FAM46C|IL17RB|KIAA0226L|KLHL21|LBH|MARCH3|PTPRJ|TLE1
Human Breast_Bonnefoi07_202genes (18024211-Webtable1)	GeneSigDB	7	183	3.05992	1.72839	3.82514	1	2.27963	0.0347712	0.220818	+*	ARNT2|FAIM3|FTSJ1|MARCKS|TLE1|TMEM184B|TUBB4A
MYC_UP.V1_UP	MSigDB_C6	7	183	3.06132	1.72906	3.82514	1	2.27793	0.0347712	0.220818	+-/*+	ALG3|C10ORF2|IPO4|P2RX5|PIM2|PMM2|RRP9
LIM_MAMMARY_STEM_CELL_UP	MSigDB_C2	14	485	8.11458	2.79622	2.8866	1	2.10478	0.034814	0.220977	++/**	ARHGAP24|ASPHD2|CHST7|DOCK10|EPHB1|KLHL21|LAG3|LBH|LEPREL1|MYOCD|NETO2|PTPLA|SLC38A5|TCF4|EXCLUDED_GENES:|CCND2|FOXP1
Human Leukemia_Rodriguez07_50genes (17611561-SuppTable3)	GeneSigDB	3	43	0.718513	0.838848	6.97674	1	2.71978	0.0350138	0.22111	+*	CHN2|GAB1|TLE1|EXCLUDED_GENES:|BLNK|CCND2
Human Leukemia_Larsson06_44genes (16423051-Table1)	GeneSigDB	3	43	0.718745	0.839116	6.97674	1	2.71864	0.0350138	0.22111	+*	CCR7|CD44|IL2RA
REACTOME_SIGNALING_BY_FGFR_MUTANTS	MSigDB_C2	3	43	0.717877	0.839581	6.97674	1	2.71817	0.0350138	0.22111	+*	GAB1|GAB2|STAT3
MODULE_70	MSigDB_C4	3	43	0.719118	0.839299	6.97674	1	2.71761	0.0350138	0.22111	++	CDKL1|COL9A3|DBN1
REACTOME_NRAGE_SIGNALS_DEATH_THROUGH_JNK	MSigDB_C2	3	43	0.718785	0.840261	6.97674	1	2.71489	0.0350138	0.22111	+*	ARHGEF3|FGD2|RASGRF1
Glucose_starve_UP	SignatureDB	3	43	0.719855	0.839873	6.97674	1	2.71487	0.0350138	0.22111	+*/++	C11ORF80|IGHM|PCK2
MANTOVANI_NFKB_TARGETS_UP	MSigDB_C2	3	43	0.719584	0.84004	6.97674	1	2.71465	0.0350138	0.22111	+*/**	BCL2|IL10|NFKBIZ
Human Lung_Kikuchi03_50genes (12687021-Figure1)	GeneSigDB	3	43	0.719212	0.840641	6.97674	1	2.71315	0.0350138	0.22111	+*	GYG1|PARL|SFTPB
KUROZUMI_RESPONSE_TO_ONCOCYTIC_VIRUS	MSigDB_C2	3	43	0.720129	0.841168	6.97674	1	2.71036	0.0350138	0.22111	+*	CCL22|CCR7|IL10RA|EXCLUDED_GENES:|IL16
Human Leukemia_Wilson06_50genes_DifferentialClusterC2 (16597596-TableS3-3)	GeneSigDB	3	43	0.720866	0.841017	6.97674	1	2.70998	0.0350138	0.22111	+*	IL10RA|LILRA4|SEC61B
SHIN_B_CELL_LYMPHOMA_CLUSTER_5	MSigDB_C2	2	18	0.300849	0.54314	11.1111	1	3.12838	0.0357827	0.221113	+*	BCL3|RASGRF1
Human Esophagus_Joshi06_20genes (16818663-Table2)	GeneSigDB	2	18	0.300106	0.543388	11.1111	1	3.12832	0.0357827	0.221113	+*	CD44|SLC33A1
Regulatory_T_cell_McHugh_Herman_concensus	SignatureDB	2	18	0.300881	0.543242	11.1111	1	3.12774	0.0357827	0.221113	+*	IL10|IL2RA
PODAR_RESPONSE_TO_ADAPHOSTIN_DN	MSigDB_C2	2	18	0.300088	0.543573	11.1111	1	3.12729	0.0357827	0.221113	++/+*	HK2|TFRC
Human Breast_Nimeus-Malmstrom06_20genes (17023159-Table3)	GeneSigDB	2	18	0.300505	0.543472	11.1111	1	3.12711	0.0357827	0.221113	+*	IL12A|MANF
DNA_DIRECTED_RNA_POLYMERASE_COMPLEX	MSigDB_C5	2	18	0.30077	0.54343	11.1111	1	3.12686	0.0357827	0.221113	+*	POLR1C|POLR3G
REACTOME_SIGNALING_BY_FGFR1_FUSION_MUTANTS	MSigDB_C2	2	18	0.300654	0.543472	11.1111	1	3.12683	0.0357827	0.221113	++	GAB2|STAT3
RIBOSOME_BIOGENESIS_AND_ASSEMBLY	MSigDB_C5	2	18	0.301026	0.543509	11.1111	1	3.12594	0.0357827	0.221113	+*	NOLC1|RRP9
REGULATION_OF_PEPTIDYL_TYROSINE_PHOSPHORYLATION	MSigDB_C5	2	18	0.300914	0.543607	11.1111	1	3.12558	0.0357827	0.221113	+*	IL12A|LYN
TGCACGA,MIR-517A,MIR-517C	MSigDB_C3	2	18	0.301048	0.543651	11.1111	1	3.12508	0.0357827	0.221113	+*	AKIRIN1|DBN1
HASLINGER_B_CLL_WITH_MUTATED_VH_GENES	MSigDB_C2	2	18	0.301046	0.54367	11.1111	1	3.12497	0.0357827	0.221113	++	IL10RA|TLE1
Human Lymphoma_Martinez03_23genes (14678979-Table2)	GeneSigDB	2	18	0.300734	0.543825	11.1111	1	3.12466	0.0357827	0.221113	++	BCL2|CFLAR
RNA_POLYMERASE_COMPLEX	MSigDB_C5	2	18	0.300998	0.543844	11.1111	1	3.12406	0.0357827	0.221113	+*	POLR1C|POLR3G
Human Breast_Cicatiello04_18genes (15171711-Table4)	GeneSigDB	2	18	0.301284	0.543855	11.1111	1	3.12347	0.0357827	0.221113	+*	ITGAE|PCK2
Mouse Embryo_Deschenes05_27genes (16195394-Table2)	GeneSigDB	2	18	0.300856	0.544015	11.1111	1	3.12334	0.0357827	0.221113	+*	CCR10|FGD2
Notch_T-ALL_Sharma_DN	SignatureDB	2	18	0.30124	0.543925	11.1111	1	3.12315	0.0357827	0.221113	+*/+*	CD200|CD47
MODULE_392	MSigDB_C4	2	18	0.30104	0.544021	11.1111	1	3.12297	0.0357827	0.221113	+*	NOLC1|SMARCC1
NUCLEAR_DNA_DIRECTED_RNA_POLYMERASE_COMPLEX	MSigDB_C5	2	18	0.301362	0.543961	11.1111	1	3.12272	0.0357827	0.221113	+*	POLR1C|POLR3G
Human Leukemia_Li07_19genes (17313671-SuppTable1d)	GeneSigDB	2	18	0.301099	0.544102	11.1111	1	3.1224	0.0357827	0.221113	+*	MCM2|PLK3|EXCLUDED_GENES:|CCND2
SULFUR_COMPOUND_BIOSYNTHETIC_PROCESS	MSigDB_C5	2	18	0.301191	0.544082	11.1111	1	3.12234	0.0357827	0.221113	+*	CHST7|GCLC
BIOCARTA_CALCINEURIN_PATHWAY	MSigDB_C2	2	18	0.300977	0.544167	11.1111	1	3.12224	0.0357827	0.221113	+*	MARCKS|PRKCB
SCHEIDEREIT_IKK_TARGETS	MSigDB_C2	2	18	0.301002	0.544324	11.1111	1	3.1213	0.0357827	0.221113	+*	NFKBIB|NFKBID
REACTOME_SYNTHESIS_OF_PC	MSigDB_C2	2	18	0.301324	0.544324	11.1111	1	3.12071	0.0357827	0.221113	+*	LPIN2|PCYT1A
Human Colon_Jorissen08_20genes (19088021-Table4)	GeneSigDB	2	18	0.301447	0.544462	11.1111	1	3.11969	0.0357827	0.221113	+*	KIAA0226L|PHACTR2
Human Bone_Dring04_19genes (15355895-Table2b)	GeneSigDB	2	18	0.301318	0.544511	11.1111	1	3.11965	0.0357827	0.221113	+*	PRKCB|ZMYND11|EXCLUDED_GENES:|CCND2
CHOI_ATL_CHRONIC_VS_ACUTE_DN	MSigDB_C2	2	18	0.30196	0.544305	11.1111	1	3.11965	0.0357827	0.221113	+*	GTF3A|LBH
POSITIVE_REGULATION_OF_JNK_ACTIVITY	MSigDB_C5	2	18	0.301543	0.544471	11.1111	1	3.11946	0.0357827	0.221113	+*	MAP3K5|PAK1
MODULE_552	MSigDB_C4	2	18	0.301761	0.544668	11.1111	1	3.11793	0.0357827	0.221113	+*	HIST1H1C|HIST1H2AC
Human StemCell_Upender04_23genes (15466185-Table5)	GeneSigDB	2	18	0.30174	0.544696	11.1111	1	3.11781	0.0357827	0.221113	+*	MCM2|TGFBR2
NUCLEOLAR_PART	MSigDB_C5	2	18	0.301883	0.544869	11.1111	1	3.11656	0.0357827	0.221113	+*	POLR1C|RRP9
GARGALOVIC_RESPONSE_TO_OXIDIZED_PHOSPHOLIPIDS_GREY_UP	MSigDB_C2	2	18	0.302239	0.545282	11.1111	1	3.11354	0.0357827	0.221113	+*/**	DUSP5|LBH
Human Lung_not_cancer_Woodruff05_81genes (16166618-SuppTable5)	GeneSigDB	4	74	1.23676	1.10055	5.40541	1	2.51079	0.0355296	0.221113	+*	ARHGAP24|CD69|GCLC|PDE4B
REACTOME_G_ALPHA1213_SIGNALLING_EVENTS	MSigDB_C2	4	74	1.23654	1.10107	5.40541	1	2.50978	0.0355296	0.221113	++	ARHGEF3|FGD2|RAC2|RASGRF1
FONTAINE_FOLLICULAR_THYROID_ADENOMA_UP	MSigDB_C2	4	74	1.23681	1.10105	5.40541	1	2.50959	0.0355296	0.221113	+*/+*	ECI1|EIF4G1|GCLC|PDLIM1
GAGCCTG,MIR-484	MSigDB_C3	5	108	1.80426	1.3302	4.62963	1	2.40245	0.0351782	0.221113	+*	LBH|LPCAT4|MAPKAPK2|NFKBIZ|PRKCB
Human Viral_Ahn05_157genes (15670303-Table1)	GeneSigDB	5	108	1.80666	1.32922	4.62963	1	2.40242	0.0351782	0.221113	+*	AP3B1|EBNA1BP2|GABPB1|PAK1|TARS
MORF_PTPN11	MSigDB_C4	5	108	1.80672	1.32967	4.62963	1	2.40156	0.0351782	0.221113	+*	ANP32A|MTDH|NDUFV2|TARS|TOMM70A
Human Lung_Dracheva07_162genes (17161497-SuppTable1)	GeneSigDB	6	145	2.4257	1.54018	4.13793	1	2.32071	0.0354109	0.221113	++	GPM6A|HCK|PAK1|RASGRF1|TGFBR2|TYMS
WEI_MIR34A_TARGETS	MSigDB_C2	6	145	2.42607	1.54175	4.13793	1	2.3181	0.0354109	0.221113	++	CD47|CYB5B|PLAGL1|RAB7L1|SMARCC1|TMEM184B|EXCLUDED_GENES:|FUT8
BYSTRYKH_HEMATOPOIESIS_STEM_CELL_AND_BRAIN_QTL_TRANS	MSigDB_C2	7	184	3.07726	1.73522	3.80435	1	2.26066	0.0356499	0.221113	+*	ANP32A|CNBP|EIF4G1|EPS15L1|PCK2|PDLIM1|RAP1GDS1
HOSHIDA_LIVER_CANCER_SUBCLASS_S3	MSigDB_C2	9	265	4.43347	2.07696	3.39623	1	2.19866	0.0350594	0.221113	++	ECI1|EHHADH|IDH3A|IQGAP2|LPIN2|MTHFD1|NDUFV2|PCK2|SMARCA2
V$AP1_Q2	MSigDB_C3	9	265	4.43452	2.07881	3.39623	1	2.1962	0.0350594	0.221113	++	CCDC50|CCL22|EIF4G1|GAB2|IL10|PIM2|PKN3|SMARCA2|TGFBR2
ESTABLISHMENT_OF_CELLULAR_LOCALIZATION	MSigDB_C5	11	351	5.87253	2.38488	3.1339	1	2.14999	0.0351058	0.221113	+*	ADRB2|ANP32A|AP3B1|BCL2|BCL3|COPB2|ERP29|KIF13B|LMAN1|SCAMP2|TLK1
GTGCCTT,MIR-506	MSigDB_C3	19	722	12.0758	3.39516	2.63158	1	2.03942	0.0358125	0.221186	++	ANXA11|B4GALT1|CCDC86|ERN1|HIVEP1|IQGAP2|KCTD5|MAPKAPK2|MAT2A|PDE4B|SCAMP2|SLC2A13|STAT3|TFRC|TLE4|TMEM184B|TRAM2|TSHZ1|ZBTB11|EXCLUDED_GENES:|CCND2|PIM1
Human Breast_Liu08_1878genes (18786252-TableS1)	GeneSigDB	27	1116	18.6572	4.18406	2.41935	1	1.99396	0.0359783	0.2221	++	ACPP|ADRB2|ARID3B|BCL2|CASP10|CD37|CD44|CD69|CFLAR|CHD1|DBN1|IL2RA|IVNS1ABP|KIF14|MAPKAPK2|MYOCD|NFKBIB|PCYT1A|PIAS2|PIM2|RAC2|SACS|SCAMP2|SLA|TGFBR2|TLE4|UBE2E3|EXCLUDED_GENES:|CCND2|ETV6|IL16|PIM1
MODULE_72	MSigDB_C4	10	309	5.1666	2.23962	3.23625	1	2.15813	0.0360437	0.222282	++	GYG1|MCM2|MRPL3|NFKBIB|SMARCA2|TFRC|TLK1|TRAM2|TYMS|UGCG
HORIUCHI_WTAP_TARGETS_DN	MSigDB_C2	10	309	5.16691	2.24206	3.23625	1	2.15565	0.0360437	0.222282	++/+*	CCDC86|CD44|FECH|GLO1|KIF14|LEPROTL1|POLR3G|SRPRB|TYMS|WDFY1
BROWNE_HCMV_INFECTION_16HR_UP	MSigDB_C2	8	225	3.76602	1.91404	3.55556	1	2.21207	0.0362166	0.223236	++/*+	BPGM|C18ORF25|C9ORF91|CHD1|IGSF3|LYN|MAT2A|TFRC
SENESE_HDAC3_TARGETS_DN	MSigDB_C2	15	534	8.93138	2.93485	2.80899	1	2.06778	0.0362822	0.223529	++/++	ANP32A|ATP13A3|C6ORF106|C7ORF23|CTR9|CYB5B|KIF14|LBH|LIMD1|LOC645638|PDLIM1|PLAC8|TCF4|TRAM2|WDR6
Blood_Module-1.5_Myeloid_lineage-1	SignatureDB	5	109	1.82289	1.33458	4.58716	1	2.3806	0.0363841	0.223997	+*	ACPP|HCK|LILRA2|LILRB2|PLBD1
ELVIDGE_HYPOXIA_DN	MSigDB_C2	6	146	2.44026	1.54464	4.10959	1	2.30458	0.0364305	0.223997	*+/+*	C6ORF106|CCDC86|GYG1|IDH3A|MAPKAPK2|NETO2
ALK_DN.V1_DN	MSigDB_C6	6	146	2.43977	1.54491	4.10959	1	2.3045	0.0364305	0.223997	*+/+*	ARID3B|COL9A3|LILRA6|OAS1|SLA|USP46
GOZGIT_ESR1_TARGETS_UP	MSigDB_C2	6	146	2.44307	1.54698	4.10959	1	2.29927	0.0364305	0.223997	++/++	CACNA1D|DOCK10|PLCL2|PTPN2|SUB1|TNFAIP8|EXCLUDED_GENES:|BLNK|PIM1
KOINUMA_TARGETS_OF_SMAD2_OR_SMAD3	MSigDB_C2	21	821	13.7323	3.61579	2.55786	1	2.00998	0.036727	0.225708	++	ADAMTS6|AEN|ARHGEF3|ARID3B|ATP1B3|BMPR2|CD44|ELL2|FGD2|IRF2BP2|IVNS1ABP|PARP4|PDLIM1|PNP|SLC38A2|ST6GALNAC4|SUSD1|TBL1XR1|TCF4|TGIF1|TLE1|EXCLUDED_GENES:|PIM1
Tcell_PIrep_CalciumDefPtup4x_Feske_Fig6	SignatureDB	3	44	0.733485	0.848318	6.81818	1	2.67178	0.0371238	0.226013	++	EML4|MANF|SP110|EXCLUDED_GENES:|BMF|IL16
[truncated: 10,342 more rows]

## Sheet: ABC_upGCB
Meta profile gene enrichment: shows the enrichemnt of 12,323 gene signatures against the meta profile GCB genes (present in >= 6 data-sets; 415 genes)
Headings:
Gene Signature: name of gene signature, see below for information on different gene signature sets
Source: origin of gene signature, either MSigDB (C1 -- C6; Molecular Signatures Database v3.1), DU_MQ (from Ming-Qing Du), GeneSigDB (Version 4), SHIPP (from http://www.ncbi.nlm.nih.gov/pubmed/15550490) or SignatureDB (from http://lymphochip.nih.gov/signaturedb/index.html)
	MSigDB: These signatures can be searched for at http://www.broadinstitute.org/gsea/msigdb/index.jsp
	GeneSigDB: the code in parentheses is the Pubmed publication code that the signature is from followed by the table/figure location. The gene set can be searched for at http://compbio.dfci.harvard.edu/genesigdb/ by entering the text within the parentheses (e.g. 16166618-SuppTable4).
	SignatureDB: these signatures are from http://lymphochip.nih.gov/signaturedb/index.html. Signatures can be searched for at http://lymphochip.nih.gov/signaturedb/query.htm. The exception is MYD88_Ngo_etal which is from http://www.ncbi.nlm.nih.gov/pubmed/21179087 supplemental table 1.
Overlapping: number of up-regulated genes that overlap with the gene signature.
GeneSigSize: number of genes in gene signature (The 20 genes used for classification were removed from all gene signatures to avoid bias)
randomAvg: the average number of overlapping genes in 1,000,000 random samples
randomSD: the standard deviation for 1,000,000 random samples
%Overlap: the percentage of GeneSigSize that Overlapping genes represents
Enriched: 1 if probability of enrichment is < probability of depletion
Zscore: the standard score for the observed Overlapping; using the randomAvg and randomSD
probability: the probability of Overlapping given the GeneSigSize, drawSize (number of meta profile genes) and the genes present on all platforms used to generate the meta-profile; from hypergeometric distribution.
FDR: false discovery rate, Benjamini and Hochberg correction of probability scores
Annotation: + = enriched <0.05 prob, - = depleted <0.05 prob, *= > 0.05 prob. For individual gene signatures (i.e. not a pair of _UP/_DN sets), first symbol relates to upABC, the second to upGCB, thus +- is up-regulated in ABC and depleted in GCB. For paired samples the first two symbols relate to _UP file and second two to _DN file. Thus *+/+* means that the _UP signature is enriched only in GCB…
EnrichedGenes: Genes contributing to enrichment separated with '|'. Classifier genes excluded from analysis are located after 'EXCLUDED_GENES:' tag
Gene Signature	Source	Overlapping	GeneSigSize	randomAvg	randomSD	%Overlap	Enriched	Zscore	probability	FDR	Annotation (_UP/_DN)	EnrichedGenes
GCB_gt_ABC_U133plus	SignatureDB	162	297	4.97862	2.19731	54.5455	1	71.4606	4.45366e-217	4.59135e-214	-+	ABLIM1|ADCK2|ALOX5AP|ANK3|ANKRD13A|ASB13|ATP2B1|ATP8A1|AUTS2|BAZ2B|BMP7|BPNT1|BPTF|BRWD1|BTNL9|C12ORF77|C3ORF37|C7ORF10|CADPS|CCND3|CCNG2|CD1A|CDK14|CERS4|CPNE3|CRHBP|CUX1|CXORF57|CYP39A1|DAAM1|DDIT4|DEF8|DIP2C|DNAJC10|EBF1|ENPP3|EPS15|ERP44|EVL|FADS3|FAM134B|FAM208B|FGD6|GCHFR|GCNT1|GFOD1|GLIPR1|GNA13|HGSNAT|HIP1R|HLA-DOB|HS2ST1|HSD17B12|ICOSLG|ILDR1|IQCD|IRS1|IZUMO4|KANK1|KCNH8|KCNN3|KIAA0355|K…
Human Leukemia_Lenz08_385genes (19038878-SuppTable3)	GeneSigDB	87	345	5.7837	2.36795	25.2174	1	34.2981	1.53459e-77	1.18653e-74	-+	ADAM12|ANKRD13A|ANTXR1|ASB13|BGN|BICC1|BPNT1|CDH11|COL16A1|COL1A1|COL1A2|COL5A1|COL5A2|COL6A2|CSTA|CTSK|DCN|DNAJC10|DNM1|DPYSL3|DST|EMP2|FAP|FAT1|FGD6|FN1|FRMD6|FSTL1|GPX8|GXYLT2|HEG1|HMCN1|HTRA1|INHBA|ISLR|ITGAV|KLHL5|LAMB2|LRRC15|LTBP2|LUM|MARCKSL1|MFAP2|MXRA5|MYBL1|MYO1B|NAV2|NRIP1|NXN|PAG1|PCOLCE|PDLIM3|PDPN|PLEKHF2|PLOD2|PMEPA1|POSTN|PPIC|PRSS23|PTK2|RAPGEF5|RARRES2|RCN3|ROBO1|S1PR2|SEL1L3|S…
GC_B_cell_U133Plus	SignatureDB	82	324	5.43169	2.29756	25.3086	1	33.3259	4.19231e-73	3.05077e-70	*+	A4GALT|AFF2|ASAP3|ATP8A1|BCAS4|BCL7A|BFSP2|BMP7|BPTF|BRWD1|BTNL9|C21ORF7|C3ORF37|C4ORF52|C7ORF10|CADPS|CAMK2B|CLIP2|CYP39A1|DAAM1|DCN|EPS15|FGD6|GCET2|GDPD5|HECW2|HEMGN|HOPX|HS2ST1|HTR3A|ILDR1|KCNJ1|KCNK12|KCNN3|KIAA1211|KLF12|LANCL1|LHFPL2|LINC00487|LOC285286|LPP|LYPLAL1|MAML3|MAP4K4|MFHAS1|MYBL1|NLK|OGG1|PAG1|PDGFD|PITPNC1|PLEKHF2|PLXNB2|POLD4|PRPSAP2|PTK2|RAPGEF5|RRAS2|SH3KBP1|SLC1A1|SLC30A4|S…
Stromal-1_DLBCL_survival_predictor	SignatureDB	61	260	4.35857	2.0585	23.4615	1	27.5158	5.70011e-52	3.91756e-49	-+	ADAM12|ANTXR1|BGN|CDH11|COL16A1|COL1A1|COL1A2|COL5A1|COL5A2|COL6A2|CSTA|CTSK|DCN|DNM1|DPYSL3|DST|EMP2|FAP|FAT1|FN1|FRMD6|FSTL1|HEG1|HMCN1|HTRA1|INHBA|ISLR|ITGAV|LAMB2|LRRC15|LTBP2|LUM|MFAP2|MXRA5|MYO1B|NAV2|NRIP1|NXN|PCOLCE|PDLIM3|PDPN|PLOD2|PMEPA1|POSTN|PPIC|PRSS23|RARRES2|RCN3|ROBO1|SNX7|SPARC|SPSB1|SULF1|THBS2|TMEM119|TPBG|TPM1|TSPAN6|VGLL3|WNT2|ZCCHC24
Lymph_node_High_vs_low	SignatureDB	81	647	10.8505	3.22597	12.5193	1	21.7453	8.02558e-47	5.2255e-44	-+	ADAM12|ANTXR1|ARMCX1|BGN|CD248|CDH11|CHRNA1|CILP|COL16A1|COL1A1|COL1A2|COL3A1|COL5A1|COL5A2|COL6A2|CSTA|CTSK|DCN|DPYSL3|DST|EMP2|FAP|FAT1|FN1|FNDC1|FRMD6|FSTL1|GPX8|GXYLT2|HEG1|HMCN1|HTRA1|INHBA|ISLR|ITGAV|LAMB2|LRRC15|LTBP2|LUM|MFAP2|MXRA5|MYO1B|NAV2|NNMT|NRIP1|NXN|PALLD|PCOLCE|PDLIM3|PDPN|PLOD2|PLS3|PLXDC1|PMEPA1|POSTN|PPIC|PRKCDBP|PRSS23|RAPH1|RARRES2|RCN3|RGS1|ROBO1|SLC12A8|SLCO3A1|SNX7|SPARC…
GC_B_cell_BL_equal_DLBCL	SignatureDB	53	224	3.75232	1.91256	23.6607	1	25.7496	2.26717e-45	1.40236e-42	*+	A4GALT|ASAP3|ATP8A1|BCAS4|BFSP2|BPTF|BRWD1|BTNL9|C4ORF52|C7ORF10|CAMK2B|DAAM1|EPS15|HEMGN|HS2ST1|HTR3A|KCNJ1|KCNK12|KCNN3|KIAA1211|KLF12|LANCL1|LHFPL2|LINC00487|LPP|LYPLAL1|MAP4K4|MFHAS1|MYBL1|NLK|OGG1|PAG1|PDGFD|PITPNC1|PLEKHF2|POLD4|PRPSAP2|PTK2|SH3KBP1|SLC30A4|SPINK2|SPRED2|STAG3|STAP1|SYBU|SYPL1|SYT11|USP6NL|VAMP1|VGLL4|VNN2|WIPF1|ZFAND4|EXCLUDED_GENES:|BCL6|LRMP
Human Breast_Farmer05_3198genes_basal_apocrine_luminal (15897907-SuppTable2)	GeneSigDB	161	3102	52.0149	6.68481	5.1902	1	16.3034	1.30546e-42	7.69039e-40	++	ABLIM1|ACACB|ADAM12|AGFG1|ALDH2|ANK3|ARMCX1|ASB13|ATP10D|ATP2B1|ATP8A1|AUTS2|B4GALT5|BGN|BMP7|BNIP3L|BPTF|CAMK2B|CCNG2|CDH11|CERS4|CILP|CLGN|CLIC4|COL11A1|COL16A1|COL1A1|COL1A2|COL3A1|COL5A1|COL5A2|COL6A2|CPNE3|CSTA|CSTB|CTSK|CUL3|DAAM1|DACT1|DCN|DDHD2|DDIT4|DEF8|DIP2C|DPT|DPYSL3|DST|ECM2|EMP2|EPB41L2|EPS15|EVL|FAM134B|FAM208B|FAM82B|FAP|FAT1|FBLN5|GCNT1|GLIPR1|GRAMD1C|HLA-DQB2|HOPX|HTRA1|INHBA|I…
Germinal_center_B_cell_DLBCL_survival_predictor	SignatureDB	24	28	0.470133	0.679684	85.7143	1	34.6188	2.40513e-39	1.35245e-36	*+	ANKRD13A|ASB13|BPNT1|DNAJC10|FGD6|HMGN1|KLHL5|LINC00487|LOC440864|MARCKSL1|MYBL1|PAG1|PLEKHF2|PTK2|SEL1L3|SSBP2|STAP1|STK17A|SWAP70|TMEM123|TTC9|VGLL4|VNN2|ZNF608|EXCLUDED_GENES:|BCL6|ITPKB|LMO2|LRMP|MME|NEK6|SERPINA9
Lymph_node_U133plus	SignatureDB	47	214	3.59056	1.87239	21.9626	1	23.184	1.16502e-38	6.26631e-36	-+	ADAM12|ANTXR1|ARMCX1|CD81|CDH11|COL1A2|COL3A1|COL5A1|CSTA|DNM1|DPT|DPYSL3|DST|EMP2|ENAH|FAP|FAT1|FNDC1|FRMD6|GLIPR1|GXYLT2|HECW2|HEG1|HTRA1|ITGAV|LRRC15|LTBP2|LY75|NRIP1|PDLIM3|PLOD2|PMEPA1|PPIC|RAPH1|RARRES2|SLC12A8|SNX7|SPARC|SPSB1|SULF1|THBS2|TMEM119|TPBG|TPM1|TSPAN6|VGLL3|ZCCHC24
Germinal_center_Bcell_DLBCL	SignatureDB	29	53	0.888258	0.933682	54.717	1	30.1085	6.50877e-38	3.355e-35	*+	BCL7A|C3ORF37|CCNG2|CUX1|DNAJC10|FAM102A|GCET2|KLHL5|LINC00487|MAPK10|MAST2|MFHAS1|MILR1|MYBL1|OGG1|OSBPL3|PAG1|PRPSAP2|PTK2|RAPGEF5|SEL1L3|SLC1A1|SORL1|SPRED2|STAP1|STK17A|TOX|VPREB3|ZNF608|EXCLUDED_GENES:|BCL6|LRMP|MME|SERPINA9
BCR	SHIPP	65	541	9.06847	2.95384	12.0148	1	18.9352	2.47511e-36	1.22478e-33	++	ABLIM1|ASAP1|ASB13|AUTS2|BCL7A|BTNL9|C3ORF37|CCND3|CPNE3|CUX1|DAAM1|DIP2C|ERP44|FADS3|FAM208B|GDPD5|HDAC1|HLA-DOB|HMGN1|HTR3A|ITSN2|JUP|KANK1|LOC151162#MGAT5|LOC220594|LY75|LY86|LY9|MAP4K4|MAPK10|MARCKSL1|MEF2C|MGMT|MKNK2|MSH6|MYBL1|NEIL1|PARP1|PDGFD|PFKL|PIK3C2B|PITPNC1|PRPSAP2|PTK2|RAB3GAP2|RAPGEF5|REL|RFTN1|RGS16|SEL1L3|SGK1|SH2B2|SLC12A8|SMARCA4|SOGA1|SORL1|SPRED2|STS|SWAP70|SYPL1|TOX|UBE2A|V…
SCHUETZ_BREAST_CANCER_DUCTAL_INVASIVE_UP	MSigDB_C2	54	346	5.79878	2.37402	15.6069	1	20.3037	3.84784e-36	1.83083e-33	*+/**	ADAM12|ATP10D|BGN|BICC1|CDH11|CILP|COL11A1|COL16A1|COL1A1|COL1A2|COL3A1|COL5A1|COL5A2|COL6A2|CTSK|DACT1|DCN|DPYSL3|ECM2|FAP|FN1|FSTL1|GLIPR1|HEG1|HLA-DQB2|HTRA1|INHBA|ISLR|LRRC15|LUM|MAP4K4|MEF2C|MFAP2|MXRA5|NNMT|PALLD|PLS3|PLXDC1|PMEPA1|POSTN|PPIC|PRKCDBP|RARRES2|RECK|RGCC|RGS1|ROBO1|SGK1|SOBP|SPARC|SSPN|SULF1|THBS2|WIPF1|EXCLUDED_GENES:|LMO2|MME
Human Lymphoma_Tome05_151genes (16081686-SuppTable1)	GeneSigDB	26	42	0.704456	0.831108	61.9048	1	30.4359	4.06149e-36	1.86091e-33	*+	BCL7A|C3ORF37|CCNG2|CUX1|DNAJC10|FAM102A|GCET2|MAPK10|MAST2|MFHAS1|MYBL1|NEIL1|OGG1|OSBPL3|PAG1|PTK2|RAPGEF5|SEL1L3|SLC1A1|SORL1|SPRED2|STAP1|STK17A|TOX|VPREB3|ZNF608|EXCLUDED_GENES:|BCL6|LRMP|MME|SERPINA9
Lymph_node_LymphDx	SignatureDB	26	56	0.938452	0.959564	46.4286	1	26.1176	1.30914e-31	5.78405e-29	*+	ADAM12|ANTXR1|CDH11|COL1A2|CSTA|CTSK|DPYSL3|FAP|FAT1|FN1|FNDC1|HEG1|ITGAV|LRRC15|LTBP2|LUM|OAT|PDLIM3|PMEPA1|PPIC|RARRES2|SPARC|SULF1|THBS2|TMEM119|TPM1
[truncated: 12,309 more rows]
