# Supplementary material for: A Microarray Platform-Independent Classification Tool for Cell of Origin Class Allows Comparative Analysis of Gene Expression in Diffuse Large B-cell Lymphoma
Source: PLoS One. 2013 Feb 12;8(2):e55895. doi: 10.1371/journal.pone.0055895 (PMC3570548; doi:10.1371/journal.pone.0055895)
Supplement: Table S9 — Signature enrichments for individual data sets. The table is divided into two parts including results for all tested signatures for each data set individually in the comparison of ABC vs GCB DLBCL class. The first worksheet shows results for the ABC class (upABC_GCB), the second the results for the GCB class (ABC_upGCB). This emphasises the consistency of signature enrichment rather than the consistant differential expression of individual genes. For each signature the following are shown: the Gene Signature designation (Gene Signature), Source of the signature (Source), the number of data sets in which the signature was enriched/depleted (Number_of_Samples), the average Z score of the observed enrichment (avgZscore), the standard deviation of the Z scores of enrichment (sdZscore), the average probability (avgProb), the standard deviation of probabilities of enrichment (sdProb), whether there is consistent enrichment or depletion across data sets in which enrichment/depletion is observed (ZscoresAllSameSign), annotation of the signature and any associated reciprocal signature/signature pairs for each data set (shown using the data set identifier). For the latter in each case the first symbol refers to the signature status in ABC (“+” = enriched (+ve Zscore), “−” = depleted (-ve Zscore), “*” = not significantly enriched or depleted) and the second symbol to the status in GCB. Where the signature is part of a signature pair (ie there are reciprocal signatures of up (_UP) and down (_DN) regulated genes for a given condition) these are separated by a “/”. These symbols can be used to search for signatures and signature pairs with coherent regulation. (XLSX) [file pone.0055895.s010.xlsx]

## Sheet: upABC_GCB
Signatures enriched in 2 or more data-set
Headings:
Signature: gene signature name, see SupplementalTable4 MetaProfileSignatureEnrichment for more info
Source: origin of gene signature, either MSigDB (C1 -- C6; Molecular Signatures Database v3.1), DU_MQ (from Ming-Qing Du), GeneSigDB (Version 4), SHIPP (from http://www.ncbi.nlm.nih.gov/pubmed/15550490) or SignatureDB (from http://lymphochip.nih.gov/signaturedb/index.html)
	MSigDB: These signatures can be searched for at http://www.broadinstitute.org/gsea/msigdb/index.jsp
	GeneSigDB: the code in parentheses is the Pubmed publication code that the signature is from followed by the table/figure location. The gene signature can be searched for at http://compbio.dfci.harvard.edu/genesigdb/ by entering the text within the parentheses (e.g. 16166618-SuppTable4).
	SignatureDB: these signatures are from http://lymphochip.nih.gov/signaturedb/index.html. Signatures can be searched for at http://lymphochip.nih.gov/signaturedb/query.htm. The exception is MYD88_Ngo_etal which is from http://www.ncbi.nlm.nih.gov/pubmed/21179087 supplemental table 1.
Number_of_Samples: number of samples that signature enriched in, un-adjusted p-value < 0.05
avgZscore: average standard score across samples enriched in
sdZscore: standard deviation of Zscores for enriched samples
avgProb: average probability across samples enriched in
sdProb: standard deviation of probabilities for enriched samples
ZScoresAllSameSign?: are all zScores +ve/-ve, i.e. are all samples enriched/depleted
Annotations per dataset: + = enriched <0.05 prob, - = depleted <0.05 prob, *= > 0.05 prob. For individual gene signatures (i.e. not a pair of _UP/_DN sets), first symbol relates to upABC, the second to upGCB, thus +- is up-regulated in ABC and depleted in GCB. For paired samples the first two symbols relate to _UP file and second two to _DN file. Thus *+/+* means that the _UP signature is enriche…
upABC (ABC vs GCB)
Signature	Source	Number_of_Samples	avgZscore	sdZscore	avgProb	sdProb	ZScoresAllSameSign?	GSE10846_CHOP	GSE10846_CHOP_R	GSE12195	GSE19246	GSE22470	GSE22895	GSE31312	GSE32918	GSE34171	GSE4475	Monti
ABCgtGCB_U133AB	SignatureDB	11	41.976	9.84981	9.42275e-67	3.12517e-66	YES	+-	+-	+-	+-	+-	+-	+-	+-	+-	+-	+-
ABC_gt_GCB_PMBL_MCL_BL_U133AB	SignatureDB	11	21.5315	6.11374	3.32458e-20	1.04285e-19	YES	+-	+-	+*	+*	+-	+*	+-	+*	+*	+*	+*
Human Lymphoma_Chin09_110genes (19377508-SuppTable2)	GeneSigDB	11	16.6935	4.27748	8.80395e-17	2.90072e-16	YES	+*	+*	+*	+*	+-	+*	+*	+*	+*	+*	+*
Human Lymphoma_Poulson05_48genes (15876249-Appendix1)	GeneSigDB	11	16.4813	3.81673	8.00652e-15	2.61419e-14	YES	+*	+*	+*	+*	+*	+*	+*	+*	+*	+*	+*
ABC_gt_GCB_Affy	SignatureDB	11	10.6846	2.83859	1.46293e-06	4.71823e-06	YES	+*	+*	+*	+*	+*	+*	+*	+*	+*	+*	+*
Human Viral_Feuerhake05_31genes (15870177-FigureS3)	GeneSigDB	11	8.33989	2.7002	6.71961e-05	0.00013638	YES	+*	+*	+*	+*	+*	+*	+*	+*	+*	+*	+*
Human Lymphoma_Wright03_44genes (12900505-Figure3)	GeneSigDB	11	7.9751	2.35303	2.38862e-06	3.00642e-06	YES	++	++	++	++	++	++	++	+*	++	++	++
Dendritic_cell_CD123pos_blood	SignatureDB	11	7.92685	2.64432	0.000862692	0.00286046	YES	++	++	++	++	++	++	++	++	+*	+*	++
Splenic_marginal_zone_Bcell_gt_GC_Bcell	SignatureDB	11	7.56681	2.1939	0.00122709	0.00385982	YES	+*	+*	+*	+*	+*	+*	+*	+*	+*	+*	+*
BCL6_ChIP-CHIP_all_Ci	SignatureDB	11	6.93194	4.79328	0.00452968	0.0103996	YES	++	++	+*	++	+*	+*	+-	+*	+*	+*	+*
Human StemCell_Bhattacharya05_2471genes (16207381-Table1Sb)	GeneSigDB	11	6.90644	4.94644	0.000564062	0.00124931	YES	+*	++	+*	+-	+-	+*	+-	+-	+*	+*	+*
Human Lymphoma_Lam08_1502genes (18160665-TableS5)	GeneSigDB	11	6.83635	3.35621	0.000493863	0.00161575	YES	++	++	+*	++	++	++	+*	+*	+*	+*	++
BASSO_CD40_SIGNALING_UP	MSigDB_C2	11	6.57629	2.39596	0.000186005	0.000497977	YES	++/*+	++/*+	+*/*+	++/*+	++/*+	++/*+	++/*+	++/*+	+*/*+	++/*+	++/*+
NFkB_Up_all_OCILy3_Ly10	SignatureDB	11	6.29918	2.90565	0.00384988	0.00856516	YES	+*	+*	+*	+*	+*	+*	+*	+*	+*	+*	+*
Human Lymphoma_Sandeep06_217genes (16760443-SuppTable2)	GeneSigDB	11	6.01694	1.78011	4.91591e-05	8.60434e-05	YES	++	++	++	++	++	++	++	++	+*	++	++
CD40_Burkitt_lymphoma_UP	SignatureDB	11	5.96031	2.21435	0.000637745	0.0013911	YES	++/*+	++/*+	+*/*+	++/*+	++/*+	++/*+	++/*+	++/*+	+*/*+	++/*+	++/*+
Human Bone_Heller08_693genes (18172295-SuppTable4)	GeneSigDB	11	5.7955	2.41984	0.00103793	0.0024453	YES	+*	++	++	+*	++	++	++	++	+*	++	++
Human Lymphoma_Chan01_8genes_ABLSubtype (11757704-Table1b)	GeneSigDB	11	5.75069	2.33911	0.00668705	0.00871754	YES	+*	+*	+*	+*	+*	+*	+*	+*	+*	+*	+*
Blood_Module-1.3_B_cells	SignatureDB	11	5.74818	2.28077	0.00338051	0.00942356	YES	++	++	++	++	++	+*	++	++	++	+*	++
MYD88_Ngo_etal	SignatureDB	11	5.66558	1.48848	0.000304162	0.000737509	YES	+*	+*	+*	+*	+*	+*	+*	+*	+*	+*	+*
DIRMEIER_LMP1_RESPONSE_LATE_UP	MSigDB_C2	11	5.62812	1.86855	0.00298814	0.00773337	YES	+*/**	+*/**	+*/**	+*/**	++/**	+*/**	+*/**	+*/**	+*/**	+*/**	++/**
Human Lymphoma_Chng09_174genes (18974375-TableS5b)	GeneSigDB	11	5.47753	2.21499	0.00333109	0.00656342	YES	+*	+*	+*	+*	+*	+*	+*	+*	+*	+*	+*
Mouse Lung_not_cancer_Woodruff05_2371genes (16166618-SuppTable4)	GeneSigDB	11	5.47369	2.04981	0.000907877	0.00164403	YES	++	++	++	+*	++	++	++	++	++	++	++
SHAFFER_IRF4_TARGETS_IN_PLASMA_CELL_VS_MATURE_B_LYMPHOCYTE	MSigDB_C2	11	5.47155	2.0505	0.00223977	0.0044767	YES	+*	+*	+*	+*	+*	+*	+*	+*	+*	+*	+*
IRF4_target_MM_Plasma_cell_gt_B_cell	SignatureDB	11	5.46666	2.04736	0.00223977	0.0044767	YES	+*	+*	+*	+*	+*	+*	+*	+*	+*	+*	+*
Human Lymphoma_Miyazaki08_121genes (18537973-SuppTable1a)	GeneSigDB	11	5.45932	1.96838	0.00226113	0.00383576	YES	+-	+*	+*	+*	+*	+*	+-	+*	+*	+*	+*
NFkB_Up_bothOCILy3andLy10	SignatureDB	11	5.45477	2.29705	0.00769115	0.0153862	YES	+*	+*	+*	+*	+*	+*	+*	+*	+*	+*	+*
HELLER_HDAC_TARGETS_DN	MSigDB_C2	11	5.44868	2.3085	0.00161485	0.00271749	YES	**/+*	*+/+*	-+/+*	-*/+*	*+/++	-+/++	*+/++	**/++	*+/+*	*+/++	*+/++
LEE_RECENT_THYMIC_EMIGRANT	MSigDB_C2	11	5.44009	2.18383	0.0010312	0.00186594	YES	+*	++	+*	+*	+*	+*	+*	+*	++	+*	++
GUTIERREZ_WALDENSTROEMS_MACROGLOBULINEMIA_1_DN	MSigDB_C2	11	5.40566	2.73547	0.0113705	0.0149364	YES	**/+*	**/+*	**/+*	**/+*	**/+*	**/+*	*+/+*	*+/+*	*+/+*	**/+*	**/+*
TARTE_PLASMA_CELL_VS_B_LYMPHOCYTE_UP	MSigDB_C2	11	5.38519	1.14386	0.000802201	0.00203671	YES	+*/*+	+*/*+	+*/**	+*/**	+*/*+	+*/**	+-/*+	+*/**	+*/**	+*/*+	+*/*+
NFkB_Up_HBL1	SignatureDB	11	5.26768	1.63477	0.00193837	0.00589298	YES	+*	+*	+*	+*	+*	+*	+*	+*	+*	+*	+*
SHAFFER_IRF4_MULTIPLE_MYELOMA_PROGRAM	MSigDB_C2	11	4.99319	1.2086	0.00118382	0.00203348	YES	+*	+*	+*	+*	+*	+*	+*	+*	+*	+*	+*
IRF4_myeloma_induced_direct	SignatureDB	11	4.88393	1.21029	0.00138362	0.0023514	YES	+*	+*	+*	+*	+*	+*	+*	+*	+*	+*	+*
MODULE_361	MSigDB_C4	11	4.81411	1.0141	0.000624078	0.00108827	YES	+*	+*	+*	+*	+*	+*	+*	+*	+*	+*	+*
Human Breast_van'tVeer02_2460genes_Ergenes (11823860-SuppTable3)	GeneSigDB	11	4.77708	2.44262	0.00794093	0.0154284	YES	++	++	++	++	++	++	++	+*	++	++	++
MARZEC_IL2_SIGNALING_UP	MSigDB_C2	11	4.66395	1.71104	0.00636467	0.0098886	YES	+*/**	+*/**	+*/+*	+*/+*	+*/*+	+*/**	+*/*+	+*/**	+*/*+	+*/*+	+*/**
Human Lymphoma_Chng09_290genes (18974375-TableS5a)	GeneSigDB	11	4.6016	1.67481	0.00536506	0.0116174	YES	++	++	+*	++	++	+*	+*	++	+*	+*	++
Resting_dendritic_cell_GNF	SignatureDB	11	4.57675	1.54652	0.00385483	0.00669001	YES	+*	+*	+*	+*	+*	+*	+*	+*	+*	+*	+*
MODULE_188	MSigDB_C4	11	4.56507	1.00269	0.00261837	0.00692802	YES	+*	++	+*	+*	+*	+*	++	+*	+*	+*	+*
Human Ovarian_Li09_2322genes_cisplatinresistance (19505326-SuppTable3)	GeneSigDB	11	4.55585	2.56977	0.00325109	0.00667659	YES	++	++	+*	+*	++	++	++	+*	++	++	++
SHIPP_DLBCL_CURED_VS_FATAL_DN	MSigDB_C2	11	4.24198	1.44808	0.00565048	0.0073146	YES	**/+*	**/+*	**/+*	**/+*	**/+*	**/+*	**/+*	**/+*	**/+*	**/+*	**/+*
PASQUALUCCI_LYMPHOMA_BY_GC_STAGE_UP	MSigDB_C2	11	4.15613	1.52973	0.00618541	0.0110116	YES	++/++	++/++	+*/*+	+*/++	++/*+	++/+*	+*/++	+*/*+	++/+*	++/+*	+*/++
MODULE_238	MSigDB_C4	11	4.1093	0.953935	0.0036216	0.00665491	YES	+*	+*	+*	+*	+*	+*	+*	+*	+*	+*	+*
MODULE_301	MSigDB_C4	11	4.106	0.880441	0.00288511	0.00524531	YES	+*	+*	+*	+*	+*	+*	++	+*	+*	+*	+*
SHEDDEN_LUNG_CANCER_GOOD_SURVIVAL_A12	MSigDB_C2	11	4.07363	0.775047	0.00107572	0.00252024	YES	+*	+*	+*	+*	+*	+*	+*	+*	+*	+*	+*
MODULE_45	MSigDB_C4	11	3.84652	1.73165	0.0112256	0.0179587	YES	+*	+*	+*	+*	+*	+*	+*	+*	+-	++	+*
BYSTROEM_CORRELATED_WITH_IL5_DN	MSigDB_C2	11	3.31902	0.57016	0.00882733	0.0096491	YES	**/+*	**/+*	**/+*	**/+*	**/++	**/+*	**/+*	**/+*	**/+*	**/+*	**/++
Stromal-1_DLBCL_survival_predictor	SignatureDB	11	-3.6569	1.4833	0.0035276	0.0076387	YES	-+	-+	-+	-*	-+	-+	-+	-+	-+	-+	-+
GCB_gt_ABC_U133plus	SignatureDB	11	-3.85765	1.61864	0.00215607	0.00505768	YES	-+	-+	-+	-+	-+	-+	-+	-+	-+	-+	-+
Human Leukemia_Lenz08_385genes (19038878-SuppTable3)	GeneSigDB	11	-3.9958	1.59398	0.000913655	0.00162226	YES	-+	-+	-+	-+	-+	-+	-+	-+	-+	-+	-+
Lymph_node_High_vs_low	SignatureDB	11	-5.17751	2.25161	0.000605795	0.00186696	YES	-+	-+	-+	-*	-+	-+	-+	-+	-+	-+	-+
HOLLMANN_APOPTOSIS_VIA_CD40_DN	MSigDB_C2	10	8.31094	2.64611	1.53323e-05	3.1804e-05	YES	*+/+*	*+/+*	*+/+*	*+/+*	*+/+*	*+/+*	*+/+*		*+/+-	*+/+*	*+/+-
PILON_KLF1_TARGETS_DN	MSigDB_C2	10	8.07367	4.79566	0.004944	0.0156278	YES	*+/++	*+/++	*+/+*	**/+*	-+/++	*+/+*	*+/+-		*+/+*	-+/+*	**/++
Human StemCell_Bhattacharya05_2843genes (16207381-Table1Sa)	GeneSigDB	10	7.46192	5.07544	0.00197586	0.00548596	YES	+*	++	+*	+-	+*		+-	+-	+*	+*	+*
Human Liver_Tzur09_1908genes (19841744-TableS5)	GeneSigDB	10	7.08148	4.78624	0.00151996	0.00459657	YES	+-	+*	+*	+*	++		+*	+-	+*	+*	++
Human Leukemia_Rodriguez04_10genes (15501956-Table4)	GeneSigDB	10	6.94175	1.92147	0.000277311	0.000331459	YES	+*	+*	+*		+*	+*	+*	+*	+*	+*	+*
Human BoneMarrow_Zhan07_2181genes (17023574-TableS1)	GeneSigDB	10	6.56871	4.57636	0.000196739	0.00029029	YES	++	++	+*	+*	++	+*	+-		+*	+*	++
SHAFFER_IRF4_TARGETS_IN_ACTIVATED_DENDRITIC_CELL	MSigDB_C2	10	6.54335	1.71777	0.000264821	0.000670199	YES	+*	+*	+*	+*	+*	+*	+*		+*	+*	+*
Human Breast_Walker10_3588genes (20174566-TableS1)	GeneSigDB	10	6.38562	4.19124	0.00159237	0.00334825	YES	++	++	+*	++	++	+*	+*		++	++	++
OXYPHOS	SHIPP	10	6.32539	3.77319	0.000603245	0.00132317	YES	++	++	+*	++	++	++	+*		++	++	++
Mouse StemCell_Chambers07_1667genes (17676974-TableS1)	GeneSigDB	10	6.22258	2.73217	0.00105924	0.00307509	YES	++	++	+*	++	++	++	++	+*	++		++
RODRIGUES_THYROID_CARCINOMA_POORLY_DIFFERENTIATED_UP	MSigDB_C2	10	6.21872	5.11155	0.00631041	0.0102934	YES	+*/++	+-/*+	+-/*+	+*/++	+-/*+		+-/++	+-/*+	+*/*+	+*/*+	+*/++
Human BoneMarrow_Zhan07_458genes (17023574-TableS2)	GeneSigDB	10	5.96321	2.42451	0.00126192	0.0027363	YES	+*	+*	+*		+*	+*	+*	+*	+*	+*	+*
TARTE_PLASMA_CELL_VS_PLASMABLAST_DN	MSigDB_C2	10	5.80075	3.63755	0.00486364	0.00885181	YES	*+/+*	*+/+-	*+/+*	**/+-	-+/+*		*+/+-	*+/+-	*+/+*	-+/+*	*+/+*
BROCKE_APOPTOSIS_REVERSED_BY_IL6	MSigDB_C2	10	5.76162	1.30386	0.000653425	0.0019562	YES	+*	++	+*	+*	+*	++	+*		+*	++	++
Human StemCell_Majeti09_3024genes (19218430-TableS3)	GeneSigDB	10	5.54027	3.40095	0.00439387	0.0120131	YES	++	++	++	++	++	++	++		++	++	++
GARY_CD5_TARGETS_DN	MSigDB_C2	10	5.37641	3.8141	0.00753447	0.0123598	YES	++/+*	++/+*	**/+*	+*/+*	++/+*	++/+*	+*/+*	*+/+*		+*/+*	++/+*
Human Viral_Feuerhake05_47genes (15870177-FigureS4)	GeneSigDB	10	5.25552	1.6879	0.00417495	0.0103497	YES	+*	+*	+*	+*	+*	+*	+*	+*	+*		+*
WANG_RESPONSE_TO_GSK3_INHIBITOR_SB216763_DN	MSigDB_C2	10	5.24819	2.21213	0.00151879	0.00310576	YES	*+/+*	*+/+*		*+/+*	*+/+*	*+/+*	+*/+*	**/+*	++/+*	*+/+*	*+/+*
HELLER_HDAC_TARGETS_SILENCED_BY_METHYLATION_DN	MSigDB_C2	10	5.2294	2.13058	0.00343784	0.00971182	YES	*+/+*	*+/++	*+/++	*+/+*	-+/++	*+/++	*+/++		*+/++	*+/++	*+/++
GRAESSMANN_APOPTOSIS_BY_DOXORUBICIN_DN	MSigDB_C2	10	5.21226	3.03861	0.00550768	0.0115659	YES	+*/++	++/++	+*/++	**/+*	*+/++	*+/++	+*/++		**/++	*+/++	**/+*
Human Bladder_Osman06_1054genes (16740760-TableS1)	GeneSigDB	10	5.14011	2.98012	0.00245954	0.00503309	YES	+*	++	+-	+*	++	+*	+*	+*		+*	+*
GUTIERREZ_CHRONIC_LYMPHOCYTIC_LEUKEMIA_DN	MSigDB_C2	10	5.08072	1.92023	0.00542974	0.0132202	YES	**/+*	**/++	+*/+*	**/+*	**/+*	**/+*	**/++	+*/+*		**/+*	**/++
Human Lymphoma_Guedez05_17genes (15479729-Table2)	GeneSigDB	10	5.03838	1.39319	0.002553	0.00508949	YES	+*	+*	+*	+*	+*	+*	+*		+*	+*	+*
JAK_IL10_Ly10_Up	SignatureDB	10	5.01912	1.39123	0.0021339	0.00462208	YES	+*	+*	+*	+*	+*	+*	+*	+*	+*		+*
SHAFFER_IRF4_TARGETS_IN_MYELOMA_VS_MATURE_B_LYMPHOCYTE	MSigDB_C2	10	5.01544	1.60315	0.00289831	0.00596451	YES	+*	+*	+*	+*	+*	+*	+*		+*	+*	+*
HUMMEL_BURKITTS_LYMPHOMA_DN	MSigDB_C2	10	5.00372	1.83102	0.00377868	0.00522338	YES	*+/+*	*+/+*	*+/+*	*+/+*	*+/+*	*+/+*	*+/+*		*+/+*	**/+*	**/+*
Human StemCell_Nuytten08_2072genes (17724462-TableS2)	GeneSigDB	10	4.7241	2.70593	0.00295256	0.00523339	YES	++	++	+*	+*	++	++	++		++	++	+*
JAK_Up_HBL1	SignatureDB	10	4.68224	1.35507	0.00384333	0.0116556	YES	+*	+*	+*	+*	+*	+*	+*		+*	+*	+*
Mouse Leukemia_Mackus05_08genes (15674362-SuppTable3)	GeneSigDB	10	4.66445	0.671218	0.00632164	0.00574908	YES	+*	+*	+*		+*	+*	+*	+*	+*	+*	+*
Mouse Lung_not_cancer_Woodruff05_2037genes (16166618-SuppTable3)	GeneSigDB	10	4.64611	1.87609	0.00328085	0.00519741	YES	++	++	++	++	++	++	++	++	++		++
MONNIER_POSTRADIATION_TUMOR_ESCAPE_UP	MSigDB_C2	10	4.57413	2.04581	0.00475925	0.00672534	YES	+*/++	++/++		+*/*+	++/*+	++/*+	++/++	+*/**	+*/*+	+*/*+	++/*+
FULCHER_INFLAMMATORY_RESPONSE_LECTIN_VS_LPS_UP	MSigDB_C2	10	4.5214	1.84053	0.0046156	0.0113082	YES	++/+*	++/+*	+*/+*	+*/+*	++/++	++/*+	++/+*		++/**	++/*+	+*/++
Human Lymphoma_Hummel06_24genes (16760442-SuppTable5-2)	GeneSigDB	10	4.41657	1.65492	0.00985736	0.0123952	YES	+*	+*	+*	+*	+*	+*	+*		+*	+*	+*
SENESE_HDAC1_TARGETS_UP	MSigDB_C2	10	4.23511	1.76057	0.00413086	0.00926999	YES	+*/*+	+*/-+	+*/*+	+*/*+	++/-+	++/*+	++/*+		++/*+	++/*+	+*/*+
Human Breast_Nagaraja10_1345genes (20081105-ST-1)	GeneSigDB	10	4.20204	2.33631	0.00718854	0.0127487	YES	++	+*	+-	+*	+*	+*	+*		+-	+*	+*
Human Lymphoma_Sander08_1021genes (18713946-TableS3)	GeneSigDB	10	4.15397	2.33061	0.00670314	0.0141474	YES	+*	++	+*	++	++	+*	+*	+*	++		++
Human Lypmhoma_Leval07_832genes (17284527-TableS2)	GeneSigDB	10	4.14785	0.958204	0.00328224	0.00969332	YES	++	++	++	++	++	++	++		++	++	++
Human Breast_Farmer05_3198genes_basal_apocrine_luminal (15897907-SuppTable2)	GeneSigDB	10	4.13856	3.28018	0.0128495	0.0180597	NO	++	++	++	++	++	++	++	++		-+	++
LU_IL4_SIGNALING	MSigDB_C2	10	4.11717	1.29889	0.00480442	0.00798593	YES	++	++	++	+*		++	++	+*	++	++	++
Human Breast_Yau08_1518genes_OxidativeStress (18631401-TableS3)	GeneSigDB	10	4.10147	1.73726	0.00523606	0.00853795	YES	++	++	++	++	++	++	++		++	++	++
DACOSTA_UV_RESPONSE_VIA_ERCC3_DN	MSigDB_C2	10	4.10115	2.10483	0.0102439	0.0180317	YES	+*/++	+*/++	**/++	-*/+*	+*/++	**/++	+-/++	**/+*	**/++		**/++
Human Leukemia_Calln08_1020genes (18362358-Table7)	GeneSigDB	10	4.09264	1.67096	0.00419609	0.00534202	YES	++	++	+*	++	++	++	+*	+*	++		++
DAZARD_RESPONSE_TO_UV_SCC_DN	MSigDB_C2	10	3.93072	0.829162	0.00232322	0.00335628	YES	**/+*	+*/++	**/+*	**/+*	++/++	**/+*	+*/+*		**/+*	*+/+*	*+/++
BCL6_repressed	SignatureDB	10	3.92329	0.944197	0.0117443	0.0155887	YES	+*	+*	+*	+*	+*	+*	+*	+*	+*		+*
chr3q13	MSigDB_C1	10	3.74736	1.12341	0.00984588	0.0131694	YES	+*	+*	+*	+*	+*	+*	+*	+*		+*	+*
MODULE_119	MSigDB_C4	10	3.6325	1.08375	0.00971655	0.0180247	YES	++	++	+*	++		++	++	+*	++	++	++
REGULATION_OF_TRANSCRIPTION	MSigDB_C5	10	3.56439	1.38319	0.00976162	0.0153858	YES	+*	+*		+*	+*	++	++	+*	+*	+*	+*
LIU_TARGETS_OF_VMYB_VS_CMYB_DN	MSigDB_C2	10	3.56041	0.775504	0.00903599	0.0112461	YES	**/++	**/+*	**/+*	**/++		**/+*	**/+*	**/+*	**/++	**/+*	+*/+*
BILBAN_B_CLL_LPL_UP	MSigDB_C2	10	3.55703	1.39514	0.0105757	0.0124941	YES	+*/+*	+*/*+		+*/**	+*/**	+*/**	++/+*	+*/*+	+*/**	+*/*+	+*/++
Human Bladder_Osman06_346genes_CancerVsControl (16740760-TableS2a)	GeneSigDB	10	3.55032	1.51975	0.00845878	0.010648	YES	+*	+*	+*	+*	+*	+*	+*	+*		+*	+*
Human Bladder_Osman06_346genes_BladderVsTesticularVsKidney (16740760-TableS2b)	GeneSigDB	10	3.54497	1.5136	0.00845878	0.010648	YES	+*	+*	+*	+*	+*	+*	+*	+*		+*	+*
IFN_meta	SignatureDB	10	3.54424	2.51185	0.00528223	0.00747943	NO	+*	+*	+*	+*	++	++	+*		+*	-*	+*
Human Leukemia_Chiaretti04_314genes (14684422-TableS1)	GeneSigDB	10	3.36932	1.31905	0.0132143	0.0162196	YES	++	++	+*	++	++	++	++	+*	++		++
Human Breast_Sotiriou03_606genes_ER (12917485-Table6)	GeneSigDB	10	3.32966	1.28166	0.0136059	0.0156538	YES	++	++	+*	+*	++	++	++		++	++	++
Human Leukemia_Stam09_150genes_Figure6 (20032505-TableS8)	GeneSigDB	10	3.29283	0.876521	0.009105	0.00846687	YES	+*	+*	+*	+*	+*	+*	++	++	+*		+*
Human Leukemia_Stam09_150genes_Figure5 (20032505-TableS7)	GeneSigDB	10	3.28606	0.874468	0.009105	0.00846687	YES	+*	+*	+*	+*	+*	+*	++	++	+*		+*
HIRSCH_CELLULAR_TRANSFORMATION_SIGNATURE_UP	MSigDB_C2	10	3.25268	0.969276	0.0116092	0.0148555	YES	+*/**	+*/*+	+-/*+	+*/**	++/*+	+*/*+	+*/*+		+*/*+	++/*+	+*/**
Human StemCell_Cui05_113genes (16269079-TableS4)	GeneSigDB	10	3.24515	1.2307	0.0183324	0.0195701	YES	++	+*	+*	+*	++	++	++	+*	+*		+*
Human Sarcoma_Mason04_402genes (15489886-TableS1a)	GeneSigDB	10	3.23209	0.905858	0.00707606	0.0110064	YES	++	++	+*	+*	++	++	++	+*	++		++
Human Colon_Daoud03_167genes (12782583-Table3)	GeneSigDB	10	3.22008	0.75963	0.00810517	0.0103256	YES	+*	+*	+*		+*	+*	+*	+*	+*	+*	+*
MARSON_FOXP3_TARGETS_DN	MSigDB_C2	10	3.17983	0.751353	0.0157688	0.0152607	YES	*+/+*	*+/+*	**/+*	*+/+*	*+/+-	*+/+*	+*/+*	+*/+*	**/+*		*+/+*
V$NMYC_01	MSigDB_C3	10	3.02098	0.578839	0.00769727	0.00620513	YES	+*	+*	+*		+*	+*	+*	+*	+*	+*	+*
SMIRNOV_RESPONSE_TO_IR_6HR_DN	MSigDB_C2	10	3.01838	0.838818	0.0147493	0.0119553	YES		++/++	*+/++	*+/+*	*+/++	*+/++	**/++	**/++	*+/++	*+/++	**/++
Human Breast_Nagaraja10_3054genes (20081105-ST-2)	GeneSigDB	10	2.97495	2.47638	0.0143953	0.0150929	NO	++	++	++	++	++	++	++	-+	++		++
Human Breast_Laere08_263genes (19010862-TableS1)	GeneSigDB	10	2.7214	0.693237	0.0171969	0.0154694	YES	+*	+*	+*		+*	++	++	+*	+*	++	+*
KRIGE_RESPONSE_TO_TOSEDOSTAT_24HR_DN	MSigDB_C2	9	9.85042	5.08209	3.95205e-06	8.27158e-06	YES	++/+-	++/+-		++/+-	*+/+*	++/+*	++/+-		++/+*	*+/+*	++/+*
KRIGE_RESPONSE_TO_TOSEDOSTAT_6HR_DN	MSigDB_C2	9	8.61014	4.38507	6.47475e-05	0.000146067	YES	+*/+-	++/+-		++/+-	++/+*	++/+*	++/+-		++/+*	*+/+-	++/+*
LEE_BMP2_TARGETS_DN	MSigDB_C2	9	8.22434	5.1548	0.00052452	0.0012798	YES	*+/+*	*+/+*	*+/+*	*+/+-	-+/+*		*+/+-		-+/+*	*+/+*	**/+*
DIAZ_CHRONIC_MEYLOGENOUS_LEUKEMIA_UP	MSigDB_C2	9	7.96754	4.87966	0.00140624	0.00390419	YES	+*/**	+*/*+	+-/**	+*/*+	++/*+		+-/*+		+*/**	+*/*+	++/**
ABC_gt_GCB_LC	SignatureDB	9	7.31991	2.70228	0.00448741	0.00962782	YES	+*	+*	+*	+*		+*	+*	+*	+*		+*
WEI_MYCN_TARGETS_WITH_E_BOX	MSigDB_C2	9	7.14365	5.10454	0.00145144	0.00199726	YES	+*	+-	+*	+-	+*		+-		+*	+*	+*
Mouse InnerEar_Sajan08_5223genes (17660535-TableS4a)	GeneSigDB	9	6.77167	5.28007	0.00514026	0.0100635	YES	++	++	++	+*	++	++	++			++	++
PENG_GLUTAMINE_DEPRIVATION_DN	MSigDB_C2	9	6.76927	4.12643	0.0075037	0.0160182	YES	*+/+-	*+/+-	**/+-	*+/+-	**/+-	**/+-	+*/+-			**/+-	*+/+-
PENG_RAPAMYCIN_RESPONSE_DN	MSigDB_C2	9	6.64821	3.02614	0.00633652	0.0151751	YES	*+/+-	*+/+-	**/+-	*+/+*	*+/+-	*+/+*	++/+-			++/+-	*+/+-
KINSEY_TARGETS_OF_EWSR1_FLII_FUSION_UP	MSigDB_C2	9	6.09974	5.13005	0.00828096	0.0107236	YES	+*/*+	+*/*+		+*/+*	+*/*+		+-/*+	+-/**	+*/*+	+-/*+	+*/++
chr3q29	MSigDB_C1	9	5.87591	1.98036	0.000401341	0.000770053	YES	+*	+*		+*	+*	+*	+*		+*	+*	+*
Mouse StemCell_Lindmark04_2514genes (15474998-tableS1c)	GeneSigDB	9	5.66997	4.06454	0.00977905	0.0192503	YES	+*	+*	+*	+*	++		+-		+*	+*	+*
MORI_PLASMA_CELL_UP	MSigDB_C2	9	5.60782	1.61769	0.00209606	0.00594285	YES	+*/*+	+*/*+	+*/**	+*/**	+-/**	+*/**	+-/*+		+*/*+	+*/**
Human Leukemia_Zangrando09_1001genes (19549311-SuppTable2-MMLandPhenotype)	GeneSigDB	9	5.44518	2.51368	0.00229565	0.00567902	YES	++	++	++	++	++	++	++		++		++
ZHENG_BOUND_BY_FOXP3	MSigDB_C2	9	5.43872	1.16175	0.000148695	0.000409278	YES	++	++	+*	+*	++	+*	++		++		++
KRIGE_RESPONSE_TO_TOSEDOSTAT_6HR_UP	MSigDB_C2	9	5.3696	2.36818	0.00111323	0.00194697	YES	+*/+-	++/+-	+*/*-	++/+-	++/+*	++/+*	++/+-		++/+*		++/+*
Tcell_PIind4x_Feske_Fig4	SignatureDB	9	5.31458	1.4812	0.00057526	0.00143221	YES	+*	++	+*	+*	+*	+*	++		+*		+*
REACTOME_ASPARAGINE_N_LINKED_GLYCOSYLATION	MSigDB_C2	9	5.16805	1.47769	0.00235047	0.00662991	YES	+*	+*	+*		+*	+*	+*		+*	+*	+*
Splenic_Marginal_zone_Bcell_gt_naive_and_GC_Bcell	SignatureDB	9	5.16656	1.11564	0.00355246	0.00879753	YES	+*	+*	+*		+*	+*	+*	+*		+*	+*
BOYAULT_LIVER_CANCER_SUBCLASS_G3_UP	MSigDB_C2	9	5.07524	2.63167	0.00353598	0.00568926	YES	+*/*+	+*/*+		+*/**	+*/*+		+-/*+	+*/*+	+*/*+	+*/**	+*/**
STAT3high_ABC_DLBCL_subgroup	SignatureDB	9	5.06185	1.54717	0.00148626	0.00242049	YES	+*	+*	+*	+*	+*		+*	+*	+*		+*
Human Leukemia_Li07_12genes_Anti-apoptosis (17313671-SuppTable1a)	GeneSigDB	9	5.02008	1.53342	0.00475289	0.00502609	YES	+*	+*		+*	+*	+*	+*		+*	+*	+*
Leucine_starve_DN	SignatureDB	9	5.01189	2.61602	0.00557726	0.00800944	YES	++/+-	++/+-	*+/+*	*+/+*	*+/+-		++/+-	*+/+-		*+/+-	*+/+-
BIOPOLYMER_METABOLIC_PROCESS	MSigDB_C5	9	4.98305	3.25317	0.00971997	0.0173144	YES	+*	+*	+*		+*	+*	+*		+*	+*	+*
chr18p11	MSigDB_C1	9	4.9797	2.07491	0.00611136	0.0124525	YES	+*	+*	+*	+*	+*	+*	+*		+*		+*
Human Immune_Kong10_2491genes_ImmPort_CD40LandAnti-IgMvsControl (20460173-ImmPortCD40LandAnti-IgMvsControl)	GeneSigDB	9	4.97186	1.72863	0.00136242	0.00349239	YES	++	++	++	++	++	++	++			++	++
BERTUCCI_MEDULLARY_VS_DUCTAL_BREAST_CANCER_UP	MSigDB_C2	9	4.9389	1.95608	0.000716247	0.00131022	YES	+*/-+	+*/*+	+-/*+	+*/**	+*/-+	+*/*+	+*/-+		+*/*+		+*/**
BASSO_B_LYMPHOCYTE_NETWORK	MSigDB_C2	9	4.81934	2.96368	0.00914627	0.0122857	YES	+*	+*	+*	+*	+*		+-	+*		+*	+*
Human Leukemia_Li07_22genes (17313671-SuppTable1b)	GeneSigDB	9	4.81734	1.77679	0.00509649	0.00955026	YES	+*	+*	+*		+*	+*	+*		+*	+*	+*
GRAESSMANN_RESPONSE_TO_MC_AND_DOXORUBICIN_DN	MSigDB_C2	9	4.80725	3.04879	0.0123189	0.019043	YES	+*/+*	*+/+-		**/+-	*+/+*	*+/+-	+*/+*		**/+*	**/+-	**/+*
Human Leukemia_Tavolaro10_56genes (20036005-Table3)	GeneSigDB	9	4.77436	1.75344	0.00305185	0.00662131	YES	+*	+*	+*	+*	+*	+*	+*		+*	+*
Tcell_PIind4x_Feske_Fig6	SignatureDB	9	4.74434	1.39611	0.000636552	0.000766095	YES	+*	+*	+*	+*	+*	+*	++		+*		+*
Human EmbryonicStemCell_Thomas08_839genes (18689800-TableS5)	GeneSigDB	9	4.73884	1.5999	0.000761106	0.00112182	YES	++	++		+*	++	+*	+*		+*	+*	+*
Human Lung_Olejniczak07_80genes (17426248-TableS2b)	GeneSigDB	9	4.72629	1.46077	0.00909846	0.0180045	YES	+*	+-	+*		+-	+*	+*		+*	+*	+*
Human Immune_Kong10_1790genes_ImmPort_Anti-IgMvsControl (20460173-ImmPortAnti-IgMvsControl)	GeneSigDB	9	4.66956	2.22867	0.00687897	0.0142723	YES	++	++	++	++	++	++	++			++	++
DUTERTRE_ESTRADIOL_RESPONSE_6HR_UP	MSigDB_C2	9	4.64669	1.65461	0.00260434	0.0050308	YES	+*/-*	++/*+		++/*+	++/-+	++/*+	++/*+	+*/*+		+*/*+	++/*+
IRF4_myeloma_induced_all	SignatureDB	9	4.63167	1.70501	0.0076435	0.0163942	YES	+*	+*	+*	++	+*	+*	+*		+*		+*
FINETTI_BREAST_CANCER_KINOME_GREEN	MSigDB_C2	9	4.62937	1.63651	0.00504422	0.00489705	YES	+*	+*	+*		+*	+*	+*		++	++	+*
chr19q13	MSigDB_C1	9	4.53962	3.4496	0.0064323	0.0156515	NO	+-	+-		--	+-	+-	+-	+-	+-	+-
BCR	SHIPP	9	4.52031	2.64108	0.00469605	0.00600005	YES	++		++	++	++	++	++		++	++	++
Human Lymphoma_Cassinelli09_59genes (19555670-Table3b)	GeneSigDB	9	4.5105	1.43427	0.00380891	0.00555189	YES	+*	+*		+*	+*	+*	+*		+*	+*	+*
BCL6_ChIP-CHIP_3celltypes_BCL6_motif_Ci	SignatureDB	9	4.48081	2.59756	0.0122245	0.0163349	YES	+*	+-			+-	+-	+-	+-	+*	+*	+*
MORI_EMU_MYC_LYMPHOMA_BY_ONSET_TIME_DN	MSigDB_C2	9	4.46397	1.66594	0.00930489	0.0115519	YES	**/+*	+*/+*	**/+*	**/+*		**/+*	+*/+*		**/+*	*-/+*	**/+*
Human Viral_Urosevic07_341genes (17823660-TableS1b)	GeneSigDB	9	4.4536	1.48687	0.00137372	0.00212516	YES	+*	+*		+*	++	+*	+*	+*	+*		+*
Mouse StemCell_Hutton04_134genes (15504237-Table1)	GeneSigDB	9	4.36544	1.45094	0.00281677	0.00436625	YES	+*	++	+*	+*	+*	+*	+*		+*		+*
OSMAN_BLADDER_CANCER_DN	MSigDB_C2	9	4.28147	2.13394	0.00835626	0.0160516	YES	+*/++	+*/++		+*/+*	++/+*	**/+*	+*/+*	+-/+*		**/+*	+*/+*
Human Leukemia_Calln08_651genes (18362358-Table10)	GeneSigDB	9	4.22458	1.82839	0.00634003	0.0112121	YES	++	+*	+-		+*	+*	+*		+*	+*	+*
SHAFFER_IRF4_TARGETS_IN_ACTIVATED_B_LYMPHOCYTE	MSigDB_C2	9	4.21508	1.1961	0.00690036	0.0156039	YES	+*	+*	+*	+*	+*		+*		+*	+*	+*
Mouse InnerEar_Sajan08_2230genes (17660535-TableS4b)	GeneSigDB	9	4.11896	2.24684	0.00658911	0.011683	YES	++	++			++	++	++	+*	++	++	++
IMMUNE	SHIPP	9	4.11547	2.08807	0.00670052	0.00939044	YES	++	++	++	+*	++	++	++		++		++
DEURIG_T_CELL_PROLYMPHOCYTIC_LEUKEMIA_DN	MSigDB_C2	9	4.11189	1.58384	0.00223881	0.00290505	YES	**/+*	*+/++	*+/+*	*+/+*	++/++	*+/+*	++/+*		**/++		*+/++
CHIANG_LIVER_CANCER_SUBCLASS_PROLIFERATION_UP	MSigDB_C2	9	4.11186	1.24881	0.00183524	0.00299708	YES	++/**	++/**		+*/**	+*/-*	++/**	+*/**	+*/**		++/**	++/**
HUTTMANN_B_CLL_POOR_SURVIVAL_UP	MSigDB_C2	9	4.00852	1.75767	0.0102807	0.016284	YES	+*/*+	+*/*+	+*/*+		++/*+	+*/*+	+*/*+		+*/*+	+*/*+	+*/++
IZADPANAH_STEM_CELL_ADIPOSE_VS_BONE_UP	MSigDB_C2	9	3.96817	1.20111	0.00844994	0.0148183	YES	+*/*+	+*/-+	+*/*+	+*/*+	+*/-+	++/*+	+*/*+		+*/*+		+*/*+
BAELDE_DIABETIC_NEPHROPATHY_DN	MSigDB_C2	9	3.96612	1.34753	0.00287994	0.00492235	YES	**/++	-+/++	**/++	**/++	-+/++	*+/++	**/++		**/++		**/++
GARY_CD5_TARGETS_UP	MSigDB_C2	9	3.96182	1.64552	0.00628299	0.0106993	YES	++/+*	++/+*		+*/+*	++/+*	++/+*	+*/+*		++/**	+*/+*	++/+*
Pan_B_U133plus	SignatureDB	9	3.93653	1.45012	0.0084749	0.0136109	YES		++	+*	++	+*	++	++		++	+*	++
REGULATION_OF_NUCLEOBASENUCLEOSIDENUCLEOTIDE_AND_NUCLEIC_ACID_METABOLIC_PROCESS	MSigDB_C5	9	3.91211	1.52953	0.00809268	0.0163981	YES	+*	+*		+*	+*	+*	++		+*	+*	+*
Human Viral_Feuerhake05_46genes (15870177-FigureS2)	GeneSigDB	9	3.89751	1.3668	0.010556	0.0134576	YES	+*	+*	+*	+*		+*	+*	+*	+*		++
Human Embryo_Heim07_2325genes (17880687-TableS2)	GeneSigDB	9	3.87071	1.13989	0.0019153	0.00406476	YES	++	++	++	+*		++	++	++	++		++
REACTOME_TRANSPORT_TO_THE_GOLGI_AND_SUBSEQUENT_MODIFICATION	MSigDB_C2	9	3.85589	1.67479	0.015829	0.0169369	YES	+*	+*	+*	+*	+*	+*	+*			+*	+*
ZHENG_FOXP3_TARGETS_IN_THYMUS_UP	MSigDB_C2	9	3.81664	0.958858	0.00362058	0.0080475	YES	+*/**	++/*+	+*/**	+*/**	++/**	+*/**	++/**		++/**		+*/**
Human Viral_Feuerhake05_64genes (15870177-TableS1a)	GeneSigDB	9	3.81196	1.20331	0.00707846	0.0094887	YES	+*	++	+*	+*		+*	++	+*	+*		++
DIRMEIER_LMP1_RESPONSE_EARLY	MSigDB_C2	9	3.81023	1.54904	0.010807	0.0153514	YES	++	++	+*		++	+*	++		+*	+*	++
BOSCO_ALLERGEN_INDUCED_TH2_ASSOCIATED_MODULE	MSigDB_C2	9	3.77012	1.49893	0.00871494	0.0118665	YES		++	+*	+*		+*	++	+*	++	++	++
OUILLETTE_CLL_13Q14_DELETION_DN	MSigDB_C2	9	3.75081	1.22031	0.0107591	0.0141964	YES	**/+*	*+/+*	**/+*	*+/+*	*+/+*	**/+*	**/+*	**/+*	*+/+*
IVANOVA_HEMATOPOIESIS_EARLY_PROGENITOR	MSigDB_C2	9	3.7299	1.95563	0.0165766	0.0164221	YES	+*	++	+*		+*	+*	+*	+*	+*		++
Human Lymphoma_Chin09_1201genes (19377508-SuppTable1)	GeneSigDB	9	3.72865	1.51892	0.00811338	0.0115176	YES	++	++	++	++		++	++	++	++		++
Human Leukemia_Sasaki05_192genes (15471956-Table2)	GeneSigDB	9	3.70906	1.28553	0.00500498	0.00592775	YES	++	++	+*	+*	++		+*	+*		++	++
Human Breast_Parker09_1918genes_IntrinsicGenes_Compilation (19204204-SupplementaryTable5)	GeneSigDB	9	3.70026	2.13838	0.0159508	0.0177984	YES	++	++	+*	+*		++	++		++	++	++
Human Leukemia_Mullighan07_838genes (17597811-SuppTable6)	GeneSigDB	9	3.69299	1.75495	0.00732862	0.0090248	YES	++	++	+*		++	++	++		++	++	++
RUTELLA_RESPONSE_TO_HGF_DN	MSigDB_C2	9	3.66413	1.3789	0.011889	0.0186792	YES	++/++	++/++	+*/+*		++/++	*+/+*	++/++		*+/+*	*+/++	++/++
TRANSCRIPTION	MSigDB_C5	9	3.63931	1.41226	0.00840803	0.0133672	YES	+*	+*		+*	+*	+*	+*	+-		+*	+*
PID_IL2_1PATHWAY	MSigDB_C2	9	3.62497	1.18482	0.0100847	0.0116232	YES	+*	+*	+*	++	++	+*	++	+*	+*
REGULATION_OF_GENE_EXPRESSION	MSigDB_C5	9	3.61173	1.48881	0.012915	0.018701	YES	+*	+*		+*	+*	++	++	+*	+*		+*
Tcell_PIind_CalciumDefPtdown4x_Feske_Fig4	SignatureDB	9	3.58957	1.32811	0.00926255	0.00761257	YES	+*	+*	+*	+*	+*		+*		+*	+*	+*
SASAKI_ADULT_T_CELL_LEUKEMIA	MSigDB_C2	9	3.57351	1.22304	0.00563571	0.00645527	YES	++	++	++	+*	+*		+*	+*		++	++
Human Lymphoma_Shin07_15genes (17638852-Table7)	GeneSigDB	9	3.56907	1.05315	0.020817	0.0185604	YES	+*	+*	++	+*	+*	+*	+*		++	+*
Human Breast_Bertucci06_527genes (16651414-Supp4)	GeneSigDB	9	3.53414	1.16443	0.005098	0.00789339	YES	+*	+*		+*	++	++	++		+*	+*	++
IFN_PMBC_2x_Up	SignatureDB	9	3.53339	2.52596	0.00561066	0.00877348	NO	+*	+*		+*	+*	+*	+*		+*	-*	+*
MARTENS_BOUND_BY_PML_RARA_FUSION	MSigDB_C2	9	3.53121	1.55143	0.013849	0.0171145	YES	+*	+*	+*		+*	++	+*		+-	+*	+*
Human Leukemia_Messina10_16genes (20564080-Table4)	GeneSigDB	9	3.5266	0.751561	0.0157494	0.015669	YES	+*	+*		+*	+*	+*	+*		+*	++	+*
OSWALD_HEMATOPOIETIC_STEM_CELL_IN_COLLAGEN_GEL_UP	MSigDB_C2	9	3.47142	0.955678	0.00812014	0.0120962	YES	+*/+*	+*/*+	+*/**	+-/+*		+*/++	++/+*	+*/**	+*/+*		+*/*+
KLF2_repressed	SignatureDB	9	3.40962	1.13046	0.0101117	0.0125575	YES	+*	++	+*	+*	+*		++	+*		+*	++
Human Leukemia_Ge06_105genes (16249385-Table2)	GeneSigDB	9	3.39442	1.69154	0.0155829	0.0147366	YES	+*	+*	++	+*	++		+*	+*	+*		+*
SENGUPTA_NASOPHARYNGEAL_CARCINOMA_WITH_LMP1_UP	MSigDB_C2	9	3.31688	1.87766	0.0208964	0.0206892	YES	+*/*+	+*/*+	+*/*+	+*/**	+*/-*	+*/**	++/*+		+*/**		++/*+
MATSUDA_NATURAL_KILLER_DIFFERENTIATION	MSigDB_C2	9	3.22936	1.21358	0.0101708	0.0129729	YES	+*	++	++	++	++	++	++	+*			++
Human Leukemia_Kiiveri08_100genes_MLLTree (18410693-TableS6)	GeneSigDB	9	3.16387	0.665358	0.0129271	0.0158966	YES	+*	++		+*	++	+*	+*	+*	+*		+*
Human HeadandNeck_Jarvinen06_325genes (16715129-SuppTable3)	GeneSigDB	9	3.15497	1.05988	0.0129681	0.0142156	YES	+*	+*		+*	+*	+*	+*		+*	+*	+*
CUI_TCF21_TARGETS_2_DN	MSigDB_C2	9	3.12071	1.33986	0.0181201	0.0213669	YES	*+/++	*+/++	-+/++	**/++		*+/++	*+/++	**/+*	*+/++		**/++
Human Viral_Wang04_1482genes (15220918-TableS1a)	GeneSigDB	9	2.96153	0.895344	0.010978	0.0133254	YES	++	++	++	+*		++	++		++	++	++
ZHANG_BREAST_CANCER_PROGENITORS_DN	MSigDB_C2	9	2.93274	0.796933	0.0160429	0.017919	YES	+*/+*	+*/+*	**/+*	**/+-	+*/+*	**/+*	+-/+*			**/+*	+*/+*
THEILGAARD_NEUTROPHIL_AT_SKIN_WOUND_UP	MSigDB_C2	9	2.91656	0.946146	0.0205488	0.013744	YES	+*/**	+*/**	+*/**	++/**	+*/*+	+*/**	+*/+*		+*/**		+*/**
Human Leukemia_Mullighan07_566genes (17597811-SuppTable7)	GeneSigDB	9	2.8263	0.826676	0.0131326	0.0124852	YES	++	++	+*	+*	++	++	++			++	++
REGULATION_OF_TRANSCRIPTION_FROM_RNA_POLYMERASE_II_PROMOTER	MSigDB_C5	9	2.79758	0.993935	0.0181727	0.0164474	YES	+*	++		+*	+*	++	+*	+*	+*		+*
WAKABAYASHI_ADIPOGENESIS_PPARG_RXRA_BOUND_8D	MSigDB_C2	9	2.77931	0.697502	0.0122888	0.0138993	YES	++	++	+*		++		+*	+*	+*	+*	+*
GC_B_cell_U133Plus	SignatureDB	9	-3.05212	0.936188	0.00732921	0.0121682	YES	-+	-+		-+	-+	-+	-+	-+	-+	-+
Rat Hypothalamic_Mansuy10_1931genes (20937356-TableS2)	GeneSigDB	8	8.05763	5.25187	0.00239125	0.00473237	YES	+*	+*		+*	+*		+-	+*		+*	+*
Myc_overexpression_1.5x_UP	SignatureDB	8	7.20873	2.73813	0.00449701	0.0127004	YES	+*	+-		+*	+-	+*	+-			+*	+*
Glutamine_starve_DN	SignatureDB	8	7.14541	3.93999	0.00378366	0.00968974	YES	*+/+-	*+/+-		*+/+-	*+/+-	*+/+-	++/+-			*+/+-	*+/+-
CAIRO_HEPATOBLASTOMA_CLASSES_UP	MSigDB_C2	8	6.82038	4.86688	0.00413548	0.00751815	YES	+-/*+	+-/*+		+-/**	+-/*+	+-/*+	+-/*+			+-/*+	+*/**
Human Breast_Mutarelli08_1488genes (18387200-Genes)	GeneSigDB	8	6.60443	3.53317	0.00414309	0.0105807	YES	+*	++		+*	+*		+*	+*		++	+*
MANALO_HYPOXIA_DN	MSigDB_C2	8	6.39836	4.50965	0.0107923	0.0186974	YES	*+/+-	-+/+-		**/+-	-+/+-		*+/+-	*+/+-		-+/+-	*+/+-
Human StemCell_Nilsson07_3742genes (17616640-TableS1)	GeneSigDB	8	6.26913	4.50399	0.00616049	0.0132709	YES	++	++	+*		++	+*	+*			++	++
JOHNSTONE_PARVB_TARGETS_3_DN	MSigDB_C2	8	6.26672	5.18334	0.00498706	0.00720195	YES	+*/++	*+/+*	+*/+*	+*/+*	*+/+*		++/+*	**/+-			+*/+*
Mouse Lymphoma_Wu08_1167genes (18535662-TableS2d)	GeneSigDB	8	6.25183	5.26782	0.00631362	0.0160992	NO	+*	+-	--	+-	+-		+-			+-	+-
SCHLOSSER_MYC_TARGETS_REPRESSED_BY_SERUM	MSigDB_C2	8	6.1383	2.88283	0.00304532	0.00599783	YES	+-	+*		+*	+-	+*	+-		+-		+*
XBP1_target_secretory	SignatureDB	8	5.71257	0.971362	0.000126645	0.000217697	YES	+*	+*	+*		+*	+*	+*			+*	+*
NUCLEOBASENUCLEOSIDENUCLEOTIDE_AND_NUCLEIC_ACID_METABOLIC_PROCESS	MSigDB_C5	8	5.64421	3.37045	0.00250927	0.00370256	YES	+*	+*			+-	+*	+*		+*	+*	+*
SPIELMAN_LYMPHOBLAST_EUROPEAN_VS_ASIAN_DN	MSigDB_C2	8	5.62504	3.24769	0.00289086	0.00493903	YES	*+/+*	*+/+*	**/+*		+*/++		+-/+-		**/+*	+*/++	**/++
PUJANA_ATM_PCC_NETWORK	MSigDB_C2	8	5.62453	3.79356	0.00392607	0.00977021	YES	++	++			+*	+*	+*		+*	+*	++
Myc_RNAi_OCILy3	SignatureDB	8	5.40044	2.79423	0.00406809	0.00614895	YES	+*	+*		+*	+-		+-		+*	+*	+*
BERENJENO_TRANSFORMED_BY_RHOA_UP	MSigDB_C2	8	5.37657	3.59352	0.00334344	0.00757175	YES	+*/++	+*/*+		+-/**	+*/*+		+-/*+		+*/*+	+*/*+	+*/*+
PENG_LEUCINE_DEPRIVATION_DN	MSigDB_C2	8	5.29222	2.86491	0.00714385	0.010942	YES	++/+-	*+/+-	*+/+*	*+/+-	*+/+*		*+/+-			*+/+-	*+/+-
MARSON_BOUND_BY_FOXP3_STIMULATED	MSigDB_C2	8	5.28195	2.89999	0.000885386	0.00167607	YES	+*	++	+*		++	+*	+*			++	+*
XBP1_target_all	SignatureDB	8	4.96332	1.19605	0.000949036	0.00237413	YES	+*	+*	+*		+*	+*	+*			+*	+*
IL10_OCILy3_Up	SignatureDB	8	4.96175	1.20698	0.0018952	0.00371165	YES	+*	++	+*	+*		+*	+*		+*		+*
Human Breast_Cicatiello04_344genes (15171711-Table1)	GeneSigDB	8	4.92763	2.81627	0.00445254	0.00752399	YES	+*	+*			+*		+*	+*	+*	+*	+*
Mouse StemCell_Schimmer06_1554genes (16484322-SuppTable3)	GeneSigDB	8	4.87346	3.21373	0.00879305	0.0155302	YES	++	++		+*	++		+*		++	++	++
Human Breast_Harvell_194genes (16239301-SuppTable2a)	GeneSigDB	8	4.84996	2.64255	0.00764696	0.0134713	YES	+*	+*		+*	+*	+*	+-		+*	+*
Human Leukemia_Haslinger04_36genes (15459216-TableA2e)	GeneSigDB	8	4.82399	1.89059	0.0108374	0.0192746	YES		+*	+*		+*	+*	+*	+*		+*	+*
MEK_UP.V1_DN	MSigDB_C6	8	4.75899	1.2055	0.000861544	0.00201151	YES	*+/+*	*+/+*		**/+*	*+/+*	**/+*	*+/++			**/++	++/++
BENPORATH_ES_1	MSigDB_C2	8	4.69424	2.21876	0.00496449	0.00749283	YES	+*	+*	+*		+*		+*	+*	+*		++
Human Breast_Creighton08_2154genes (18757322-TableS1)	GeneSigDB	8	4.64843	2.53941	0.00716515	0.013468	YES	++	++			++		++	+*	++	++	++
Human Prostate_Chambers09_259genes (19489030-SuppTable7)	GeneSigDB	8	4.58385	2.5535	0.0153216	0.0211529	YES	+*	++	+*	+*	+*		+*		++		+*
Human Colon_Grade07_1950genes (17210682-SuppTable2)	GeneSigDB	8	4.58087	2.85797	0.00614039	0.00855397	YES	+*	+*		+*	+*	+*	+-			+*	+*
MODULE_15	MSigDB_C4	8	4.47668	1.65616	0.00306073	0.00528691	YES	+*	+*	+*		+*		+*	+*		++	+*
OSMAN_BLADDER_CANCER_UP	MSigDB_C2	8	4.44799	2.6279	0.00645009	0.00902264	YES	+*/++	+*/++	+*/**	+*/+*	++/+*		+*/+*	+-/+*			+*/+*
DACOSTA_UV_RESPONSE_VIA_ERCC3_COMMON_DN	MSigDB_C2	8	4.37916	1.295	0.00202604	0.00485833	YES	**/++	**/++		**/++	**/++	**/++	**/++		**/+*		**/++
Mouse StemCell_Ulloa-Montoya07_530genes (17683608-TableS5)	GeneSigDB	8	4.35416	1.62521	0.00437799	0.00882195	YES	+*	++	+*	+*	++		+*			++	+*
IRF4_target_MM_B_cell_activation	SignatureDB	8	4.31269	0.944564	0.00244423	0.00341108	YES	+*	+*	+*	+*	+*		+*		+*		+*
MCLACHLAN_DENTAL_CARIES_UP	MSigDB_C2	8	4.31112	1.61065	0.0075971	0.0152995	YES	+*/+*	++/++	+*/+*	+*/+*		++/++	+*/++		+*/**		+*/++
GNF2_NS	MSigDB_C4	8	4.23906	1.8631	0.011945	0.0171649	YES	+*	+*		+*	+*		+*	+*	+*		++
ONKEN_UVEAL_MELANOMA_DN	MSigDB_C2	8	4.22333	2.17261	0.00908915	0.0148419	YES	++/+*	++/++		**/+*	*+/++	*+/++	++/++			*+/++	++/++
CACGTG_V$MYC_Q2	MSigDB_C3	8	4.2029	2.15357	0.00759986	0.00920293	YES	+*	+*		+-	+*		+*	+-		+*	+*
Tcell_PIind_CsAdown4x	SignatureDB	8	4.14238	1.29121	0.0029503	0.00417517	YES	+*	+*		+*	+*	+*	+*		+*		+*
Mouse StemCell_Forsberg05_362genes (16151515-TableS3)	GeneSigDB	8	4.14135	0.889613	0.00293948	0.007449	YES	++	++	++	++		++	++		++		++
Human Lymphoma_Karube06_17genes (16291580-Table2a)	GeneSigDB	8	4.12537	1.40665	0.0130428	0.0148729	YES	+*	+*	+*	+*				+*	+*	+*	+*
RHODES_CANCER_META_SIGNATURE	MSigDB_C2	8	4.1196	1.81215	0.010775	0.0150548	YES	+*	+*		+*	+*	+*	+*			+*	+*
Human Immune_Allen10_2900genes (20220088-SuppTable1)	GeneSigDB	8	4.10892	1.20119	0.00171838	0.00306753	YES	++	++	++	++		++	++		++		++
RNA_METABOLIC_PROCESS	MSigDB_C5	8	4.07954	2.94384	0.0159595	0.0190468	YES	+*	+*		+*	+-	+*	+*		+*		+*
Human Leukemia_Saito10_259genes (20371479-TableS2)	GeneSigDB	8	4.06285	1.55803	0.00575073	0.00878491	YES	+*	++	+*	+*			+*	+*	+*		++
Human Lymphoma_Staege08_50genes_UpRegulated_HodgkinlymphvNorm (18400362-Figure1a)	GeneSigDB	8	4.01854	1.25542	0.0123953	0.0208442	YES	+*	+*		+*	+*		+*		+*	+*	+*
REACTOME_METABOLISM_OF_PROTEINS	MSigDB_C2	8	4.01294	2.07233	0.00738093	0.0106721	YES	+*	+-	+*		+*	+*	+-			+*	+*
BCL6_targets_CHIPCHIP	SignatureDB	8	4.00534	1.94207	0.00878964	0.0116879	YES	+*	+*	+*		+*	+-	+*			+*	+*
PASQUALUCCI_LYMPHOMA_BY_GC_STAGE_DN	MSigDB_C2	8	3.96745	1.27482	0.00536206	0.00744839	YES	++/++	++/++		+*/++		++/+*	+*/++		++/+*	++/+*	+*/++
ERB2_UP.V1_DN	MSigDB_C6	8	3.96614	1.09728	0.00508986	0.00941397	YES	**/+*	*+/++		**/++	*+/+*	*+/+*	*+/+*	**/+*			*+/++
Myc_ChIP_PET_Expr_DN	SignatureDB	8	3.96605	1.37156	0.00503202	0.00808346	YES	+*/++	+-/++	*-/++	+-/++		**/++	+-/++		**/++	+-/++
Human EmbryonicStemCell_Thomas08_1088genes (18689800-TableS7)	GeneSigDB	8	3.96104	1.93739	0.00606921	0.0125516	YES	++	++			++	++	++		++	++	++
Human Lung_Olejniczak07_36genes (17426248-TableS2a)	GeneSigDB	8	3.94081	1.31868	0.00707908	0.00820709	YES	+*	+*			+*	+*	+*		+*	+*	+*
Human Leukemia_Shah08_34genes (18477771-Table1)	GeneSigDB	8	3.9342	1.16874	0.0061115	0.00505975	YES	+*	+*	+*		+*	+*	+*	+*			+*
FOSTER_TOLERANT_MACROPHAGE_DN	MSigDB_C2	8	3.90431	0.729797	0.00141811	0.00282467	YES	**/++	**/++	**/++	+-/++		**/++	++/++		*-/++		**/++
KASLER_HDAC7_TARGETS_1_UP	MSigDB_C2	8	3.89787	0.546274	0.00126012	0.00187252	YES	+*/**	+*/**		+*/**	+*/**	+*/*+	+*/*+		+*/**	+*/**
RUTELLA_RESPONSE_TO_CSF2RB_AND_IL4_DN	MSigDB_C2	8	3.86805	2.2724	0.0155471	0.0169176	YES	++/++	++/++		+*/+*	++/++	*+/++	++/++		*+/+*		++/++
Human Leukemia_Puigdecanet08_48genes (18480837-SuppTable2)	GeneSigDB	8	3.83594	1.48472	0.0112653	0.0141981	YES	++	++	+*	++			+*	+*	++		+*
TBK1.DF_UP	MSigDB_C6	8	3.79737	1.19919	0.00478782	0.00701533	YES	+*/**	++/++	++/**	++/**	++/*+	+*/*+	++/+*				++/*+
REACTOME_POST_TRANSLATIONAL_PROTEIN_MODIFICATION	MSigDB_C2	8	3.6339	0.971029	0.00381224	0.00425551	YES	+*	+*	+*		+*	+*	+*			+*	+*
Mouse Bone_Boylan07_823genes (17483317-TableS5)	GeneSigDB	8	3.63043	1.22001	0.00739018	0.0121955	YES	++	++	++	++		++	++		++		++
Human Kidney_Sallustio10_2134genes_DiscriminatedARPCsFromRPTEC_MSC (19843711-TableS1)	GeneSigDB	8	3.61438	3.18098	0.0132174	0.0199334	NO	++	++		+*	++		++	-+	++		++
Human Leukemia_Murati09_1686genes (18818702-SuppTable2)	GeneSigDB	8	3.59627	1.72987	0.00692953	0.00778276	YES	++	++	+*	++	++		++		++		++
BIOCARTA_IL2RB_PATHWAY	MSigDB_C2	8	3.58584	1.05514	0.014704	0.0166527	YES		+*	+*	+*			+*	+*	+*	+*	+*
REGULATION_OF_RNA_METABOLIC_PROCESS	MSigDB_C5	8	3.56333	1.29551	0.0043863	0.00498927	YES	+*	+*		+*	+*	+*	+*		+*		+*
Human Breast_Graham05_133genes (15976005-Table2)	GeneSigDB	8	3.5476	1.32927	0.0125648	0.0194202	YES	+*			+*	+*	+*	++	+*	++		+*
Human UmbilicalCordBloodCells_Miyagawa09_58genes (20067540-Table4)	GeneSigDB	8	3.53255	1.09658	0.0113132	0.0144734	YES	+*	+*		+*	++		++	+*	+*		+*
REGULATION_OF_TRANSCRIPTIONDNA_DEPENDENT	MSigDB_C5	8	3.52124	1.1503	0.00379601	0.00407752	YES	+*	+*		+*	+*	+*	++		+*		+*
chr3q22	MSigDB_C1	8	3.51045	1.18606	0.0203195	0.0221173	YES	+*	+*	+*	+*	+-				+*	+*	+*
CAMP_UP.V1_UP	MSigDB_C6	8	3.50912	1.41514	0.00860474	0.0103542	YES	+*/*+	+*/*+			+*/*+	+*/*+	+*/*+	+*/*+		+*/*+	+*/*+
Tcell_cytokine_induced_PMBC_Bcell_induced	SignatureDB	8	3.48215	1.00156	0.0176436	0.0180168	YES	++	++	+*	++			+*	+*	+*		++
KRIGE_RESPONSE_TO_TOSEDOSTAT_24HR_UP	MSigDB_C2	8	3.48048	1.10651	0.00715776	0.0125265	YES	++/+-	++/+-	+*/*-	++/+-		++/+*	++/+-		++/+*		++/+*
PID_PDGFRBPATHWAY	MSigDB_C2	8	3.47536	0.45635	0.00434215	0.00382549	YES	++		+*	+*		+*	+*		++	++	++
Human Leukemia_Bomben10_212genes (20068100-TableS5)	GeneSigDB	8	3.46751	0.931083	0.0091444	0.0140259	YES	+*	+*	+*	+*	+*		+*		+*		+*
BIOPOLYMER_MODIFICATION	MSigDB_C5	8	3.45476	1.07981	0.00716746	0.0122565	YES	+*	++	+*		++	++	+*		+*	++
QI_PLASMACYTOMA_UP	MSigDB_C2	8	3.4376	1.01536	0.00833695	0.0138872	YES	++/**	++/*+	+*/*+			++/*+	+*/*+	+*/**	++/*+		++/+*
V$USF_C	MSigDB_C3	8	3.41821	1.13794	0.00982959	0.0130931	YES	+*	+*	+*		+*		+*	+*		+*	+*
BOYLAN_MULTIPLE_MYELOMA_D_DN	MSigDB_C2	8	3.41173	0.693515	0.00693571	0.00769476	YES	*+/+*	**/+*	*+/+*	++/+*	*+/+*	**/+*	*+/+*				**/+*
Human Leukemia_Chiaretti10_405genes (20418243-SuppTable1a)	GeneSigDB	8	3.40226	1.05683	0.00707342	0.0079403	YES	++	++	+*	+*		++	+*		+*		++
Human Lung_Dauer05_200genes (15735721-SuppTable1a)	GeneSigDB	8	3.3795	0.70925	0.00545635	0.00616299	YES	+*	++	+*	+*		++	++		+*		++
REACTOME_BIOSYNTHESIS_OF_THE_N_GLYCAN_PRECURSOR_DOLICHOL_LIPID_LINKED_OLIGOSACCHARIDE_LLO_AND_TRANSFER_TO_A_NASCENT_PROTEIN	MSigDB_C2	8	3.37753	0.707499	0.0114588	0.0101467	YES	+*	+*	+*		+*	+*	+*			+*	+*
SCHAEFFER_PROSTATE_DEVELOPMENT_6HR_DN	MSigDB_C2	8	3.35447	1.69546	0.0137238	0.0163618	YES	**/++	**/++		**/+*	*+/++		**/+*		**/+*	*+/+*	**/++
Tcell_PIind_CalciumDefPtdown4x_Feske_Fig6	SignatureDB	8	3.34132	1.26604	0.0145712	0.0153989	YES	+*		+*	+*	+*	+*	++		+*		+*
PROTEIN_MODIFICATION_PROCESS	MSigDB_C5	8	3.3257	1.08104	0.0100789	0.0169216	YES	+*	++	+*		++	++	+*		+*	++
ZWANG_CLASS_1_TRANSIENTLY_INDUCED_BY_EGF	MSigDB_C2	8	3.31577	1.12483	0.0116756	0.0177197	YES	++	++	++	+*	++	++	++				++
Human Breast_Hedenfalk01_176genes_BRCA (11207349-Supp2)	GeneSigDB	8	3.31348	1.63896	0.017242	0.016029	YES	+*	++		+*	+*		+*		+*	+*	++
PID_IL6_7PATHWAY	MSigDB_C2	8	3.30375	0.807802	0.0133764	0.0161909	YES		+*	+*	+*	+*	+*	+*		+*		+*
VEGF_A_UP.V1_DN	MSigDB_C6	8	3.30279	1.59328	0.0169065	0.0180402	YES	**/+*	**/+*			*+/+*		-+/+-	*+/+-	**/+*	-*/+*	**/+*
TRANSFERASE_ACTIVITY_TRANSFERRING_PHOSPHORUS_CONTAINING_GROUPS	MSigDB_C5	8	3.25455	0.81638	0.00806162	0.0124609	YES	+*	++	+*		++	++	+*		+*	++
TRANSCRIPTION_DNA_DEPENDENT	MSigDB_C5	8	3.24636	1.41058	0.0129519	0.0173301	YES	+*	+*		+*	+*	+*	+*		+*		+*
RNA_BIOSYNTHETIC_PROCESS	MSigDB_C5	8	3.23349	1.44507	0.013357	0.0177931	YES	+*	+*		+*	+*	+*	+*		+*		+*
Human Lung_not_cancer_Temple01_57genes (11694447-Figure4b)	GeneSigDB	8	3.17634	0.820956	0.0160121	0.0162403	YES	+*	+*	+*	+*		+*	+*		+*	+*
WANG_LMO4_TARGETS_UP	MSigDB_C2	8	3.16789	0.904335	0.011859	0.0177114	YES	++/**	++/+*		+*/**		++/**	++/+*		++/**	++/**	+*/**
Human Cervical_Lau07_60genes (17369842-Table1)	GeneSigDB	8	3.14338	0.975278	0.0159485	0.0154042	YES	+*	+*	+*		+*	+*	+*			+*	+*
MARSHALL_VIRAL_INFECTION_RESPONSE_DN	MSigDB_C2	8	3.13903	0.459375	0.0141419	0.00951215	YES	**/+*	**/+*	**/+*		**/+*		**/+*	**/+*	**/+*	**/+*
Human Breast_Liu07_186genes (17229949-TableS4)	GeneSigDB	8	3.10969	0.905229	0.0143593	0.0149133	YES	+*	++	+*	++		+*	+*		+*		+*
BENPORATH_SOX2_TARGETS	MSigDB_C2	8	3.08251	1.63183	0.0152688	0.0161601	YES	+*	++		+*		++	+*	+*	+*		+*
MODULE_292	MSigDB_C4	8	3.08247	1.52875	0.0245421	0.0197936	YES	+*	+*	+*			+*	+*	+*		+*	++
GTGCAAT,MIR-25,MIR-32,MIR-92,MIR-363,MIR-367	MSigDB_C3	8	3.06423	0.725754	0.00840419	0.0093347	YES	++	++	++	+*		++	++		+*		++
ENDOPLASMIC_RETICULUM_MEMBRANE	MSigDB_C5	8	3.04798	0.969701	0.0178739	0.0195071	YES	+*	+*	+*		+*	+*	+*			+*	+*
Human Breast_Sabatier10_368genes (20490655-ST3)	GeneSigDB	8	3.04369	1.13744	0.012079	0.0121978	YES	+*	++	++		++	++	++		++		+*
Human Leukemia_Mullighan07_444genes (17597811-SuppTable2)	GeneSigDB	8	3.01711	0.883962	0.0105192	0.0127016	YES	+*	++		+*	++	++	++			++	++
POST_TRANSLATIONAL_PROTEIN_MODIFICATION	MSigDB_C5	8	3.00317	0.810654	0.0113836	0.0163389	YES	+*	++	+*	+*		++	++		+*	++
ANTI_APOPTOSIS	MSigDB_C5	8	2.986	1.3445	0.0228132	0.0152601	YES	+*	+*	+*	+*		+*		+*	+*		+*
HADDAD_B_LYMPHOCYTE_PROGENITOR	MSigDB_C2	8	2.9794	0.655554	0.0106788	0.014975	YES	++	++		++	++	++	++			++	++
CTACTGT,MIR-199A	MSigDB_C3	8	2.97932	0.782201	0.0118403	0.0109344	YES	+*	++		+*	++	++	++		+*		+*
Human Zola07_426genes_CellDifferentiationMarkers (17174972-TableS1)	GeneSigDB	8	2.96999	0.596348	0.0101311	0.0147204	YES	+*	+*	+*	+*		+*		++	+*		+*
TORCHIA_TARGETS_OF_EWSR1_FLI1_FUSION_DN	MSigDB_C2	8	2.96246	0.864138	0.013496	0.0165399	YES	**/++	*+/++	**/++			**/++	*+/++		**/++	**/++	*+/++
IL6_Ly10_Up_all	SignatureDB	8	2.95098	0.695847	0.0218435	0.0170569	YES	+*	++	+*	+*	+*	+*	+*				+*
CREIGHTON_ENDOCRINE_THERAPY_RESISTANCE_4	MSigDB_C2	8	2.94546	0.661925	0.0112271	0.0154901	YES	++	++		++	++	+*	++	+*			++
Human Breast_Bertucci06_534genes (16651414-Supp3)	GeneSigDB	8	2.9262	1.14366	0.0154203	0.0160276	YES	+*	++	++		++	++	++		++		+*
Human Sarcoma_Missiaglia10_176genes (20502458-TableS6a)	GeneSigDB	8	2.88693	0.720115	0.0181773	0.0170829	YES		++	++	++		++	++		++	++	++
Human Breast_Pothuri10_361genes (20436685-ST5-1)	GeneSigDB	8	2.87095	1.19037	0.0160758	0.0142358	YES	+*	++			++	+*	+*		+*	+*	+*
PID_HIVNEFPATHWAY	MSigDB_C2	8	2.85866	0.49943	0.0244489	0.0184165	YES	+*	+*	+*		+*	+*	+-		+*		+*
BOYLAN_MULTIPLE_MYELOMA_C_D_UP	MSigDB_C2	8	2.8538	0.454878	0.0119908	0.00868573	YES	+*/**	+*/*+		+*/*+	+*/-*		+*/++	+*/*+	+*/*+		++/*+
PROTEIN_AMINO_ACID_PHOSPHORYLATION	MSigDB_C5	8	2.84942	0.680811	0.0126936	0.0116229	YES	+*	++	+*	+*		++	++		+*	++
SANSOM_APC_MYC_TARGETS	MSigDB_C2	8	2.76723	0.504746	0.0137786	0.0143058	YES	+*	+*	+*	+*	+*		+*			+*	+*
TRANSCRIPTION_FACTOR_BINDING	MSigDB_C5	8	2.75514	0.752075	0.0164237	0.0179942	YES	+*	+*	+*	+*	+*	++	+*			+*
TAKEDA_TARGETS_OF_NUP98_HOXA9_FUSION_16D_UP	MSigDB_C2	8	2.74976	0.502811	0.0148338	0.0119199	YES	++/**	++/**	+*/**	++/**		++/*+	++/-*		++/*+		++/**
MORI_SMALL_PRE_BII_LYMPHOCYTE_UP	MSigDB_C2	8	2.72657	0.448395	0.0201446	0.0160227	YES	+*/**	+*/++	+*/**	+*/**		+*/**	+*/+*			+*/**	+*/**
MODULE_145	MSigDB_C4	8	2.70917	0.569915	0.0168258	0.00955377	YES	+*	++	+*			+*	++	+*		+*	+*
BIOCARTA_HIVNEF_PATHWAY	MSigDB_C2	8	2.69166	0.296789	0.0192055	0.00983215	YES	+*	++			++	++	+*		+*	+*	+*
HOLLEMAN_VINCRISTINE_RESISTANCE_B_ALL_UP	MSigDB_C2	8	2.6542	0.561865	0.028719	0.0150462	YES	+*/**	+*/**			+*/**	+*/**		+*/**	+*/**	+*/**	+*/+*
ENK_UV_RESPONSE_EPIDERMIS_DN	MSigDB_C2	8	2.63663	0.553196	0.0154158	0.0190041	YES	++/++	++/++	**/+*	+*/+*	**/++	*+/++	+*/++				++/+*
CHEN_METABOLIC_SYNDROM_NETWORK	MSigDB_C2	8	2.6315	2.26956	0.00706028	0.0145127	NO	++	++	++	++	-+		++		++		++
GRAESSMANN_APOPTOSIS_BY_SERUM_DEPRIVATION_UP	MSigDB_C2	8	2.61946	0.99715	0.0199948	0.0135705	YES	+*/**	++/**	++/**	+*/**	++/**		++/**		++/**		+*/**
RATTENBACHER_BOUND_BY_CELF1	MSigDB_C2	8	2.59066	0.19992	0.0116057	0.00595663	YES	+*	+*	+*	+*		+*	+*		+*		+*
Mouse StemCell_Ulloa-Montoya07_546genes (17683608-TableS1)	GeneSigDB	8	2.40655	0.383328	0.0192114	0.0116032	YES	+*	+*	+*	+*	+*	++			+*		+*
NEGATIVE_REGULATION_OF_BIOLOGICAL_PROCESS	MSigDB_C5	8	2.27837	0.371966	0.0223292	0.0149709	YES	+*	++		+*	++	+*	++	+*			+*
Human Immune_Kong10_5640genes_ImmPort_ComprehensiveListofImmune-RelatedGenes (20460173-ImmPortComprehensiveListofImmune-RelatedGenes)	GeneSigDB	8	2.23272	1.76799	0.00633995	0.00673318	NO	++	++	++	+*			++	++		-+	++
MIKKELSEN_MEF_HCP_WITH_H3K27ME3	MSigDB_C2	8	-3.52024	1.4722	0.00645456	0.00938607	YES	--	--		-*	--	--	-*			--	--
ZWANG_TRANSIENTLY_UP_BY_2ND_EGF_PULSE_ONLY	MSigDB_C2	8	-3.53129	1.47312	0.00714292	0.0127794	YES	-*	-*		-*	-*	-*	-+			-*	-*
MARTENS_TRETINOIN_RESPONSE_UP	MSigDB_C2	8	-3.6563	1.49525	0.00471817	0.00982699	YES	-*/+-	--/+-		--/**	--/+-	-*/*-	-*/+-			-*/+-	--/+*
Lymph_node_U133plus	SignatureDB	8	-3.68989	1.32616	0.00279957	0.00530752	YES	-+	-+	-+		-+	-+	-+			-+	-+
DODD_NASOPHARYNGEAL_CARCINOMA_DN	MSigDB_C2	7	7.67346	6.97272	0.00482899	0.0106376	YES	**/+*	-+/+*			-*/+*		-+/+-	*+/+-	-+/+*		**/+*
Myc_ChIP_PET_Expr_UP	SignatureDB	7	7.59499	4.53598	0.00694429	0.0172449	YES	+*/++	+-/++		+-/++	+-/*+		+-/++			+-/++	+*/*+
PUJANA_BRCA1_PCC_NETWORK	MSigDB_C2	7	7.51711	5.88876	0.00206102	0.0034508	YES	++	+*			+-	+*	+-			+-	+*
Proliferation_DLBCL	SignatureDB	7	6.87274	4.90616	0.00409842	0.00836202	YES	+*	+*			+*		+-	+-		+*	+*
SCHUHMACHER_MYC_TARGETS_UP	MSigDB_C2	7	6.75513	2.52629	0.0040514	0.0104454	YES	+-/**	+-/**			+-/**		+-/**	+*/**		+-/**	+*/**
Mouse Lymphoma_Wu08_1114genes (18535662-TableS1b)	GeneSigDB	7	6.60548	4.7709	0.00209099	0.00412713	YES	+-	+-			+-		+-		+*	+-	+*
RODRIGUES_THYROID_CARCINOMA_ANAPLASTIC_UP	MSigDB_C2	7	6.43256	3.5216	7.98431e-05	0.000145044	YES	+*/++	+*/*+		+-/++	+*/*+		+*/*+		++/*+		+*/*+
HIF1alpha_1.5x_DN	SignatureDB	7	6.41121	3.63786	0.00204124	0.00356914	YES	*+/+-	-+/+-			-+/+-		*+/+-	*+/+-		-+/+-	*+/+*
REACTOME_DEPOSITION_OF_NEW_CENPA_CONTAINING_NUCLEOSOMES_AT_THE_CENTROMERE	MSigDB_C2	7	6.16707	2.16865	0.000810132	0.00129351	YES		+*			+-		+-	+*	+*	+*	+*
Human Viral_Cairo08_982genes (19061838-TableS7)	GeneSigDB	7	6.10153	3.90702	0.00160698	0.00252708	YES	+*	+*			+-	+*	+*			+*	+*
Glutamine_Glucose_starve_both_DN	SignatureDB	7	6.04158	1.88307	0.00054662	0.00144426	YES	**/+*	+*/+*		**/++	**/+*		+*/+-			**/+*	**/++
BILD_MYC_ONCOGENIC_SIGNATURE	MSigDB_C2	7	5.75964	1.55823	0.000136123	0.000236784	YES	+*	+*			+*	+*	+*			+*	+*
Human StemCell_Matushansky08_1453genes (18310505-TableS7)	GeneSigDB	7	5.75315	3.53993	0.0070021	0.0120093	YES	++	++			++		+*		++	+*	+*
MUELLER_PLURINET	MSigDB_C2	7	5.73831	4.0517	0.0083759	0.0176235	YES	+*	+*		+*	+*		+-			+*	+*
Mouse StemCell_Lawlor06_2532genes (16651409-SuppTable2)	GeneSigDB	7	5.72396	3.03839	0.00197026	0.00469954	YES	++	++			++		+*		+*	+*	+*
Human StemCell_Nilsson07_3153genes (17616640-TableS3)	GeneSigDB	7	5.60235	3.57079	0.00771601	0.0130417	YES	++	++			++		++	+*	++		++
Mouse StemCell_Ulloa-Montoya07_757genes (17683608-TableS2)	GeneSigDB	7	5.571	2.29719	0.00115282	0.00243741	YES	+*	+*			+*	+*	+-		+*	+*
Human Viral_Chetaille09_501genes (19096012-TableS2)	GeneSigDB	7	5.51132	2.81634	0.00390211	0.00710428	YES	++	++			++		+*		+*	++	+*
SHEDDEN_LUNG_CANCER_POOR_SURVIVAL_A6	MSigDB_C2	7	5.33962	3.51247	0.00543154	0.00905856	YES	+*	+*			+*		+-	+-	+-	+-
YAO_TEMPORAL_RESPONSE_TO_PROGESTERONE_CLUSTER_14	MSigDB_C2	7	5.24296	2.07555	0.00586775	0.0100382	YES	+*	+*			+*	+*	+*			+*	+*
REACTOME_PACKAGING_OF_TELOMERE_ENDS	MSigDB_C2	7	5.24247	2.42373	0.00895916	0.0166142	YES		+*			+*		+*	+*	+*	+*	+*
Human Viral_Chetaille09_425genes (19096012-TableS3)	GeneSigDB	7	5.21066	4.23717	0.00377171	0.00951146	NO	+-	+-		+*	+*		+*			-+	+*
MORF_PRKDC	MSigDB_C4	7	5.1974	2.31183	0.00571271	0.014969	YES	+*	+*			+-		+-		+-	+-	+*
Human Brain_Lastowska07_548genes (17533364-TableS3)	GeneSigDB	7	5.11251	1.70659	0.000190067	0.00034685	YES	+*	+*		+*	+*	+-	+*			+*
Human Breast_Chang04_772genes_WoundHealing_CSR_genes (14737219-CSRgenes)	GeneSigDB	7	5.08462	2.69125	0.00675548	0.0172967	YES	++	+*			+*		+*		+*	+*	+*
MODULE_17	MSigDB_C4	7	5.03074	1.99751	0.00590186	0.0147367	YES	+*	+-			+*		+-	+-		+*	+*
RUTELLA_RESPONSE_TO_HGF_UP	MSigDB_C2	7	5.02758	1.61584	0.00223465	0.00581351	YES	++/++	++/++	+*/+*	+*/*+	++/++		++/++				++/++
ACEVEDO_LIVER_CANCER_UP	MSigDB_C2	7	5.00434	2.80486	0.00777572	0.0111613	YES	++/**	++/**	+*/**	+*/**	++/*+		+-/**				+*/**
CASORELLI_ACUTE_PROMYELOCYTIC_LEUKEMIA_DN	MSigDB_C2	7	4.96273	2.74851	0.00224247	0.00504426	YES	**/+*	*+/+*		*+/+*	*+/++		*+/+*			*+/+*	**/++
RUTELLA_RESPONSE_TO_CSF2RB_AND_IL4_UP	MSigDB_C2	7	4.88208	1.34205	0.0012894	0.0032574	YES	++/++	++/++	+*/**	+*/+*	++/++		++/++				++/++
KARLSSON_TGFB1_TARGETS_UP	MSigDB_C2	7	4.87962	2.28417	0.00711279	0.0133489	YES	+*/++	+*/*+		+*/*+	++/*+		+*/++			++/*+	+*/**
Human InVitro_Bild06_206genes (16273092-TableS1a)	GeneSigDB	7	4.87144	1.60207	0.00366574	0.00836172	YES	+*	+*			+*	+*	+*			+*	+*
YAO_TEMPORAL_RESPONSE_TO_PROGESTERONE_CLUSTER_11	MSigDB_C2	7	4.85153	1.79619	0.00345292	0.00820528	YES	+*	+*		+*	+*		+-			+*	+*
RUTELLA_RESPONSE_TO_HGF_VS_CSF2RB_AND_IL4_UP	MSigDB_C2	7	4.8419	1.99144	0.00388574	0.00983357	YES	++/++	+*/++	+*/+*	+*/++	++/*+		++/++				++/++
Human HeadandNeck_Slebos06_18genes (16467079-Table3a)	GeneSigDB	7	4.84098	1.79164	0.00944392	0.0166787	YES	+*	+*		+*	+*	+*	+*			+*
KEGG_N_GLYCAN_BIOSYNTHESIS	MSigDB_C2	7	4.81703	1.19616	0.00278935	0.00572084	YES		+*	+*		+*	+*	+*			+*	+*
Human StemCell_Kocer08_864genes (18667080-TableS2)	GeneSigDB	7	4.81044	3.48935	0.00748143	0.0142905	YES	++	++		+*	++		++		++		+*
chr18q21	MSigDB_C1	7	4.77888	1.49743	0.0033317	0.00742634	YES	+*	+*			+*	+*	+-		+*	+*
IRF4_myeloma_induced_Lymphochip	SignatureDB	7	4.77886	1.0704	0.000230464	0.000183559	YES	+*	+*	+*		+*		+*		+*		+*
LASTOWSKA_NEUROBLASTOMA_COPY_NUMBER_DN	MSigDB_C2	7	4.7709	2.54365	0.00744183	0.0185111	YES	+-/+*	**/+*		**/+*	+*/+*	**/+*	+*/+-			+-/+*
Tcell_cytokine_induced_prolif	SignatureDB	7	4.68013	1.55	0.00449818	0.00902252	YES	+*	+*	+*		+*		+*			+*	+*
KEGG_PROTEIN_EXPORT	MSigDB_C2	7	4.65157	1.2568	0.00416149	0.00641313	YES	+*	+*	+*		+*		+*		+*	+*
GNF2_RAN	MSigDB_C4	7	4.63935	2.43161	0.00378672	0.00455931	YES	+*	+-		+*	+-		+-			+*	+*
MODULE_16	MSigDB_C4	7	4.63569	1.5673	0.000802284	0.00154829	YES	+*	+*			+*		+-	+*		+*	+*
MARSON_BOUND_BY_FOXP3_UNSTIMULATED	MSigDB_C2	7	4.60426	2.91975	0.00409818	0.00595584	YES	++	++	+*		++	+*	+-			++
Human Lymphoma_Kaminski03_16genes (12946996-Table2)	GeneSigDB	7	4.47348	1.49501	0.0135804	0.0129576	YES	+*		+*	+*		+*		+*		+*	+*
Human Breast_Turner10_324genes (20101236-SuppTable7a)	GeneSigDB	7	4.4667	1.52682	0.00421328	0.00801746	YES	+*	+*			+*	+*	+*		+*	+*
Human Kidney_Sallustio10_2134genes_CompleteListAnalysis (19843711-TableS2)	GeneSigDB	7	4.43898	2.54635	0.00709283	0.0132473	YES	++	++		+*	++		++		++		++
VANTVEER_BREAST_CANCER_ESR1_DN	MSigDB_C2	7	4.42642	0.82176	0.0010259	0.00172388	YES	++/+*	++/+*	**/+*	**/+*			*+/+*	**/+*			+*/+*
FAELT_B_CLL_WITH_VH_REARRANGEMENTS_DN	MSigDB_C2	7	4.39909	1.40284	0.00255087	0.00486295	YES	+*/+*	**/++			**/++	**/+*	+*/+*		**/+*		**/+*
FEVR_CTNNB1_TARGETS_DN	MSigDB_C2	7	4.39651	3.12035	0.00761936	0.0136651	YES	**/+*	*+/+*			-+/+*		*+/+*	*+/+*		*+/+*	**/++
SCHLOSSER_MYC_TARGETS_AND_SERUM_RESPONSE_UP	MSigDB_C2	7	4.34471	1.51115	0.00481813	0.00545015	YES	+-/+-	+*/+-			+*/+-	+*/**	+*/+-			+*/**	+*/+*
Human Breast_Bertucci06_2537genes (16651414-Supp2)	GeneSigDB	7	4.33822	4.03203	0.0152	0.0187469	YES	++	++			++	++	++		++		++
NUYTTEN_EZH2_TARGETS_UP	MSigDB_C2	7	4.31465	1.52164	0.00323625	0.00539273	YES	++/++	++/+*	++/**	+*/**		++/**	++/+*				++/**
KEGG_GLYCOSAMINOGLYCAN_BIOSYNTHESIS_KERATAN_SULFATE	MSigDB_C2	7	4.31265	1.04571	0.0110067	0.0158813	YES	+*		+*	+*	+*	+*				+*	+*
Mouse Leukemia_Powell09_138genes (19805619-TableS3)	GeneSigDB	7	4.30675	1.80104	0.00905218	0.01474	YES	+*	+*		+*	+*	+*	+-				+*
WANG_SMARCE1_TARGETS_DN	MSigDB_C2	7	4.28093	1.94024	0.0070603	0.0135971	YES	*+/++	-+/++	*+/+*	*+/+*	-+/++		-+/++				*+/+*
Human Breast_Mackay07_1395GenesUpRegulated (17555561-Table2)	GeneSigDB	7	4.27559	1.69843	0.00111445	0.00185297	YES	++	++		+*		++	++		++		++
Human Leukemia_Boag07_100genes_pre-BALLvCD34_DN (17760805-SuppTableS2b)	GeneSigDB	7	4.25719	1.01444	0.00191134	0.00272642	YES	+*	+*	+*	+*	+*		++				+*
Mouse StemCell_Lindmark04_950genes (15474998-tableS1b)	GeneSigDB	7	4.24515	3.50094	0.0180056	0.0194972	YES	++	++	+*	+*	++		+*				++
MIPS_H2AX_COMPLEX_II	MSigDB_C2	7	4.21997	0.20524	0.0055413	0.00439031	YES	+*	+*			+*	+*	+*		+*		+*
chr3p21	MSigDB_C1	7	4.21303	1.68629	0.00253095	0.00463197	YES	+-	+*		+*	+-	+-	+-			+-
Human Bone_Heller08_28genes (18172295-Table1)	GeneSigDB	7	4.19818	1.30638	0.00744881	0.0110934	YES	+*	+*			+*	+*	+*			+*	+*
LINDGREN_BLADDER_CANCER_CLUSTER_3_UP	MSigDB_C2	7	4.18832	2.07852	0.00228161	0.00270522	YES	++/*+	+*/**			+*/*+		+-/++	+*/**		+-/*+	+*/*+
REACTOME_UNFOLDED_PROTEIN_RESPONSE	MSigDB_C2	7	4.1782	1.36746	0.00701652	0.0120136	YES	+*	+*	+*		+*		+*			+-	+*
RUTELLA_RESPONSE_TO_HGF_VS_CSF2RB_AND_IL4_DN	MSigDB_C2	7	4.17127	1.34859	0.00678364	0.013409	YES	++/++	+*/++	+*/+*	+*/++		*+/++	++/++				++/++
MYC_UP.V1_UP	MSigDB_C6	7	4.1074	0.915551	0.00167695	0.00259821	YES	+*/*+	+*/*+			+-/*+	+*/*+	+*/-+			+*/**	+*/**
Human Breast_Wang05_469genes_down_BT-BAF57cells (16135788-Table24)	GeneSigDB	7	4.09491	1.95059	0.00922904	0.0154143	YES	++	++	+*	+*	++		++				++
IFN_PMBC_4x_Up	SignatureDB	7	4.03134	1.2347	0.00644073	0.0118032	YES	+*	+*		+*	+*		+*	+*	+*
Myc_ChIP_PET_2plus	SignatureDB	7	4.03108	1.03394	0.00139512	0.0025939	YES	++	++		++	++	++	++		++
REGULATION_OF_CELLULAR_METABOLIC_PROCESS	MSigDB_C5	7	4.02928	1.28828	0.00339802	0.00577973	YES	+*	+*		+*	+*	++	++				+*
REACTOME_IMMUNE_SYSTEM	MSigDB_C2	7	4.00673	2.09793	0.0109537	0.0151245	YES	+*	+*	+-		++		+*	+*		+*
Human Leukemia_Mollinedo08_117genes (18547747-Table1)	GeneSigDB	7	3.99551	2.10755	0.00672469	0.00783464	YES	+*	+*			+*		+*	+*		+*	+*
REGULATION_OF_METABOLIC_PROCESS	MSigDB_C5	7	3.96872	1.28908	0.0040643	0.00689922	YES	+*	+*		+*	+*	++	++				+*
chr3q21	MSigDB_C1	7	3.94447	0.84579	0.00208402	0.00258335	YES	+*	++			+*	+*	++			+*	+*
Human BoneMarrow_Zhan07_52genes (17023574-Table2)	GeneSigDB	7	3.93437	1.39562	0.00828091	0.0103683	YES	+*	+*	+*		+*		+*			+*	+*
DAZARD_RESPONSE_TO_UV_NHEK_DN	MSigDB_C2	7	3.91764	1.4343	0.00626635	0.0104393	YES	+*/++	+*/++		**/++	+*/++	**/++	+-/++				**/++
DAIRKEE_CANCER_PRONE_RESPONSE_BPA	MSigDB_C2	7	3.90796	1.42071	0.00783765	0.00933467	YES	+*	+*	+*		+*		+*			+*	+*
NUYTTEN_EZH2_TARGETS_DN	MSigDB_C2	7	3.89243	2.56059	0.0116589	0.0150947	YES	++/++	++/+*			*+/+*		++/+*	**/+-	*+/++	*+/+*
MODULE_525	MSigDB_C4	7	3.8739	1.33193	0.010551	0.0172364	YES	+*	+*	+*		+*	+*	+*		+*
FLECHNER_BIOPSY_KIDNEY_TRANSPLANT_REJECTED_VS_OK_UP	MSigDB_C2	7	3.86033	1.41995	0.00850355	0.0151858	YES	+*/++	++/++		+*/*+	+*/*+		+*/++	+*/**			++/++
Human Leukemia_Sorich08_50genes (18416598-SuppTable3)	GeneSigDB	7	3.84742	1.08886	0.00493266	0.0043696	YES	+*	+*	+*			+*	+*	+*		+*
ENK_UV_RESPONSE_KERATINOCYTE_DN	MSigDB_C2	7	3.84338	2.11003	0.0116306	0.0177371	YES	+*/++	**/++		**/+*	*+/++	**/+*	+-/+*				**/++
Human Leukemia_Bal05_10genes (15896717-Table3)	GeneSigDB	7	3.84333	0.679271	0.0139088	0.00999473	YES					+*	+*	+*	+*	+*	+*	+*
Human Lymphoma_Sorich08_50genes (18416598-TableS3)	GeneSigDB	7	3.84232	1.0983	0.00493266	0.0043696	YES	+*	+*	+*			+*	+*	+*		+*
UDAYAKUMAR_MED1_TARGETS_UP	MSigDB_C2	7	3.83888	1.97606	0.00892043	0.0107781	YES	+*/*+	+*/*+			+*/*+		+*/*+		+*/*+	+*/*+	+*/*+
MGGAAGTG_V$GABP_B	MSigDB_C3	7	3.83182	1.32554	0.00357844	0.00489477	YES	+*	+*	+*		+*		+-		+*	+*
GRAHAM_NORMAL_QUIESCENT_VS_NORMAL_DIVIDING_DN	MSigDB_C2	7	3.81946	2.37925	0.0178131	0.0157556	YES	*+/+*	*+/+-			*+/+-		*+/+-	+*/+*		*+/+-	**/+*
GNF2_CASP1	MSigDB_C4	7	3.77941	1.41158	0.0107004	0.0170521	YES	+-	+*	+*				+*	+*	+*		+*
REACTOME_DIABETES_PATHWAYS	MSigDB_C2	7	3.76789	1.21733	0.00763479	0.0139221	YES	+*	+*	+*		+*		+*			+*	+*
SLEBOS_HEAD_AND_NECK_CANCER_WITH_HPV_UP	MSigDB_C2	7	3.76701	1.00559	0.00615711	0.0118786	YES	+*	+*		+*	+*	+*	+*			+*
Blood_Module-1.1_Plasma_cells	SignatureDB	7	3.76633	1.02328	0.00746203	0.00692375	YES	+*	+*	+*	+*			+*			+*	+*
REACTOME_DESTABILIZATION_OF_MRNA_BY_TRISTETRAPROLIN_TTP	MSigDB_C2	7	3.75143	1.02294	0.0118679	0.0130632	YES	+*	+*			+*	+*	+*	+*		+*
ONDER_CDH1_TARGETS_1_DN	MSigDB_C2	7	3.74122	0.9292	0.00317089	0.0034973	YES	**/+*	**/+*	*+/+*	**/+*	-+/+*		*+/+*		**/+*
MCLACHLAN_DENTAL_CARIES_DN	MSigDB_C2	7	3.73853	1.28476	0.0078199	0.0128334	YES	+*/+*	++/++	+*/+*	+*/+*		++/++	+*/++				+*/++
Human HeadandNeck_Sok03_31genes (12874079-Table3d)	GeneSigDB	7	3.72577	1.43329	0.00982524	0.00976693	YES	+*	+*			+*	+*	+*			+*	+*
Mouse DendriticCells_Bar-On10_21genes (20679228-TableS5)	GeneSigDB	7	3.7237	1.12809	0.0201049	0.0202605	YES	+*		+*	+*		+*	+*		+*		+*
FARMER_BREAST_CANCER_BASAL_VS_LULMINAL	MSigDB_C2	7	3.72162	0.96112	0.00479347	0.00965705	YES	+*	++		+*		+*	++		+*		+*
MARKS_HDAC_TARGETS_DN	MSigDB_C2	7	3.70608	1.70994	0.0253268	0.0201887	YES	**/+*	**/+*	**/+*					**/+*	**/+*	**/+*	**/+*
RODWELL_AGING_KIDNEY_UP	MSigDB_C2	7	3.69775	1.67988	0.0140605	0.0183559	YES	++/**	++/++	++/**			++/*+	++/*+		++/*+		+*/**
Human Lymphoma_Rimsza08_37genes (18544678-Table1)	GeneSigDB	7	3.69455	1.55592	0.0128337	0.0112344	YES		++		+*	++	++	+*			+*	+*
XU_CREBBP_TARGETS_UP	MSigDB_C2	7	3.69241	0.780768	0.00756066	0.00591419	YES	+*/+*	+*/**		+*/**	+*/**		+*/**			+*/**	+*/**
GARCIA_TARGETS_OF_FLI1_AND_DAX1_DN	MSigDB_C2	7	3.68532	1.7399	0.0137799	0.0185827	YES	**/+*	**/+-	**/+*		**/+-		*+/+-		**/+*		**/+*
Human Lypmhoma_Leval07_644genes (17284527-TableS1)	GeneSigDB	7	3.68238	1.35012	0.00604592	0.00887918	YES		++	++	+*		++	++		++		++
NFkB_Up_BCR_paper	SignatureDB	7	3.68143	0.788411	0.00486623	0.00512463	YES	+*	+*	+*	+*			+*	+*			+*
Human Breast_Desmedt08_95genes_STAT1_Module (18698033-tableS1-STAT1)	GeneSigDB	7	3.68106	0.957321	0.00898041	0.0172182	YES	+*	+*	+*	+*			+*	+*			+*
FULCHER_INFLAMMATORY_RESPONSE_LECTIN_VS_LPS_DN	MSigDB_C2	7	3.67515	1.98171	0.0120278	0.0146947	YES	++/+*	++/+*	+*/+*	+*/+*	++/++		++/+*				+*/++
JAATINEN_HEMATOPOIETIC_STEM_CELL_DN	MSigDB_C2	7	3.65942	1.16754	0.00841012	0.0163484	YES	*+/+*	++/++	*+/+*			*+/++	++/++		*+/+*		*+/++
FLECHNER_PBL_KIDNEY_TRANSPLANT_REJECTED_VS_OK_UP	MSigDB_C2	7	3.64889	0.602936	0.00510931	0.0063703	YES	+*/**	+*/**			++/**		+*/+*		+*/**	+*/**	+*/**
TOOKER_GEMCITABINE_RESISTANCE_DN	MSigDB_C2	7	3.64527	1.03948	0.00582416	0.00957351	YES	**/+*	**/++		**/+*	**/++		**/++			**/++	**/+*
Human Lymphoma_Shin07_62genes (17638852-Table2)	GeneSigDB	7	3.61413	1.25262	0.00857904	0.0103627	YES	+*	+*	+*		+*		+*	+*			+*
KOBAYASHI_EGFR_SIGNALING_24HR_DN	MSigDB_C2	7	3.6032	3.57488	0.0151293	0.0179545	NO		**/+*				**/-*	*+/+-	**/+-	**/+*	++/+*	+*/+*
CELLULAR_PROTEIN_METABOLIC_PROCESS	MSigDB_C5	7	3.59152	1.41995	0.00788973	0.0118274	YES	+*	+*	+*		++	++	+*			++
Human Lymphoma_Lossos02_152genes (12077300-SuppTable2)	GeneSigDB	7	3.58615	1.95694	0.018218	0.0200521	YES	+*	+*			+*	+*	+*		+*		+*
NIKOLSKY_BREAST_CANCER_1Q32_AMPLICON	MSigDB_C2	7	3.57628	0.661562	0.0172419	0.0159043	YES	+*	+*	+*	+*	+*		+*	+*
MODULE_84	MSigDB_C4	7	3.57471	1.38834	0.00867289	0.0139151	YES	+*	++	+*			++	++		+*		+*
CSR_LATE_UP.V1_UP	MSigDB_C6	7	3.55184	1.25204	0.0107212	0.0173125	YES	+*/*+	+*/**		+*/**	+*/*+		+*/*+			+*/*+	+*/**
Human Immune_Kong10_855genes_ImmPort_CD40LvsControl (20460173-ImmPortCD40LvsControl)	GeneSigDB	7	3.53919	0.87007	0.00451561	0.00699989	YES	++	++	++	++		++	++				++
Human Lymphoma_Staege08_50genes_UpRegulated_chemoResistant (18400362-Figure4a)	GeneSigDB	7	3.53506	1.11937	0.0133023	0.0146344	YES	+*	++		+*		+*			+*	+*	+*
CELLULAR_MACROMOLECULE_METABOLIC_PROCESS	MSigDB_C5	7	3.52571	1.39506	0.00829749	0.0120788	YES	+*	+*	+*		++	++	+*			++
Human Leukemia_Mullighan07_744genes (17597811-SuppTable5)	GeneSigDB	7	3.52299	1.68172	0.0129642	0.0153793	YES	++	++	+*	+*	++		++		++
Human Breast_Sotiriou03_137genes_Grade (12917485-Table7)	GeneSigDB	7	3.51866	0.75096	0.00488151	0.00555138	YES	+*	+*		+*	+*		+*	+*			+*
V$MYCMAX_01	MSigDB_C3	7	3.51678	1.17744	0.00804558	0.013587	YES	+-	+-			+*		+*	+-	+*		+*
IRF4_myeloma_induced_Agilent	SignatureDB	7	3.50858	1.15324	0.0141589	0.022476	YES	+*	+*	+*	+*			+*		+*		+*
MULLIGHAN_MLL_SIGNATURE_2_UP	MSigDB_C2	7	3.5009	1.74338	0.0149748	0.0190081	YES	+*/++	++/++	+*/*+			++/++	+*/++		+*/*+	++/*+
Human Lymphoma_Shin07_76genes (17638852-Table6)	GeneSigDB	7	3.49586	1.51289	0.0200325	0.0208964	YES		+*	+*			+*	+*	+*	+*		+*
GENTILE_UV_HIGH_DOSE_DN	MSigDB_C2	7	3.47735	1.04629	0.00605198	0.0103548	YES	*+/++	**/++	**/+*		**/++	**/++	*+/++				**/++
MORF_PTEN	MSigDB_C4	7	3.4492	0.820578	0.00768581	0.00998766	YES	+*	+*	+*	+*	+*	+*				+*
BIOCARTA_FAS_PATHWAY	MSigDB_C2	7	3.44345	0.750092	0.00895376	0.00757137	YES	+*	+*		+*	++	+*	+*		+*
MARTINEZ_RESPONSE_TO_TRABECTEDIN_DN	MSigDB_C2	7	3.41796	1.97047	0.0185787	0.0201344	YES	**/++	**/++	**/+*		*+/++	**/+*	**/+*				**/++
Human Leukemia_Puigdecanet08_96genes (18480837-SuppTable1)	GeneSigDB	7	3.40785	1.18897	0.010629	0.013733	YES	+*	+*	+*			+*	+*		+*		+*
Human Lung_Kobayashi06_320genes (17145885-SuppTable2)	GeneSigDB	7	3.39837	3.39502	0.0157631	0.017472	NO		+*				-*	+*	+-	+*	+*	+*
OKUMURA_INFLAMMATORY_RESPONSE_LPS	MSigDB_C2	7	3.39428	0.806102	0.00661686	0.0104957	YES	++	++		+*	++		+*		+*		+*
MODULE_18	MSigDB_C4	7	3.39195	1.38081	0.00879849	0.012816	YES	+*	++			+*		+*	+*	+*		+*
GAVIN_FOXP3_TARGETS_CLUSTER_T7	MSigDB_C2	7	3.39146	0.97728	0.0104665	0.0178322	YES	+*	+*	+*	+*	+*		+-				+*
MORI_PRE_BI_LYMPHOCYTE_DN	MSigDB_C2	7	3.38301	0.657361	0.00798312	0.00794296	YES	**/++	**/++	**/+*			**/+*	+*/+*		**/+*		**/++
Human Lung_not_cancer_Lockstone10_50genes (20194811-Figure1b)	GeneSigDB	7	3.38117	1.07481	0.0132356	0.0115337	YES	+*	+*	+*	+*			+*		+*		+*
Human Ovarian_Horak05_31genes (15972852-Table1)	GeneSigDB	7	3.35086	0.512947	0.0178248	0.0165362	YES	+*	+*			+*	+*	+*		+*		+*
Human Lung_Ma08_708genes (18440302-SuppTable2)	GeneSigDB	7	3.33033	1.4042	0.0104151	0.0107851	YES	++	++	++	+*	++		++				++
V$NFKB_Q6_01	MSigDB_C3	7	3.31719	0.976335	0.0115283	0.0155956	YES			+*			++	++	+*	+*	+*	+*
ZHAN_MULTIPLE_MYELOMA_CD1_AND_CD2_DN	MSigDB_C2	7	3.30413	0.859627	0.0131199	0.0133717	YES		**/+*	+*/+*		**/+*		*+/+*		*+/+*	*+/+*	++/+*
REACTOME_ADAPTIVE_IMMUNE_SYSTEM	MSigDB_C2	7	3.2709	1.63179	0.0157953	0.0222769	YES	+*	+*	+*		++		+*	+*		+*
Human Lung_Chitale09_105genes (19525976-SuppTable5c)	GeneSigDB	7	3.26658	1.44115	0.0136403	0.0119541	YES	+*	+*			+*		+*		+*	+*	+*
PID_IL2_PI3KPATHWAY	MSigDB_C2	7	3.25575	0.87407	0.0202455	0.0163148	YES		+*	+*	+*		+*	+*	+*			+*
Human Leukemia_Langer08_138genes (18378853-TableS2)	GeneSigDB	7	3.25059	0.87284	0.0119764	0.0131596	YES	+*	+-		+*			+*	+*	+*	+*
SWEET_LUNG_CANCER_KRAS_UP	MSigDB_C2	7	3.24824	0.959085	0.00922318	0.0126144	YES	+*/*+	+*/*+	+*/*+	+*/++			+*/*+		+*/*+		+*/++
STANELLE_E2F1_TARGETS	MSigDB_C2	7	3.23115	0.844424	0.0180127	0.0149338	YES		+*	+*	+*			+*	+*		+*	+*
VANTVEER_BREAST_CANCER_BRCA1_UP	MSigDB_C2	7	3.22822	1.04235	0.0195546	0.0195946	YES	+*/*+	+*/*+	++/*+		+*/*+		+*/*+		+*/**		+*/**
TTTTGAG,MIR-373	MSigDB_C3	7	3.22269	0.983537	0.0123119	0.0165903	YES	+*	++		+*		+*	+*		+*		+*
MCL_gt_SLL_DLBCL	SignatureDB	7	3.20749	0.846299	0.0173241	0.0147299	YES		+*		++	++	+*	+*		+*		+*
Human StemCell_Matushansky08_886genes (18310505-TableS1)	GeneSigDB	7	3.19945	1.57161	0.0133211	0.0136969	YES	++	++		+*		+*	++			++	+*
CHARAFE_BREAST_CANCER_LUMINAL_VS_BASAL_DN	MSigDB_C2	7	3.19938	0.491999	0.00372685	0.00313602	YES	*+/++	*+/++		**/+*		**/++	*+/++		+*/++		**/++
LINDSTEDT_DENDRITIC_CELL_MATURATION_A	MSigDB_C2	7	3.19379	1.38893	0.0225454	0.0193353	YES		+*	+*	+*			+*	+*	+*		+*
CUI_GLUCOSE_DEPRIVATION	MSigDB_C2	7	3.18519	0.496549	0.0130269	0.0122575	YES	+*	+*	+*	+*				+*	+*		+*
JAK_STAT_CASCADE	MSigDB_C5	7	3.18059	1.20502	0.0226691	0.0182507	YES	+*	+*	+*	+*	+*				+*	+*
Tcell_cytokine_induced_IL2_IL7_IL15_IL4	SignatureDB	7	3.1767	0.968809	0.0259039	0.0182809	YES		+*			+*	+*	+*	+*	+*		+*
ST_T_CELL_SIGNAL_TRANSDUCTION	MSigDB_C2	7	3.17218	0.293696	0.00893328	0.00497218	YES	+*	+*	+*			+*	+*	+*		+*
Human StemCell_Colombo09_111genes (19123479-TableS1)	GeneSigDB	7	3.1668	0.698552	0.0124517	0.0171796	YES	+*	+*	+*			+*	+*		+*		+*
AACTGGA,MIR-145	MSigDB_C3	7	3.1572	1.01399	0.0133101	0.0175659	YES	++	++	+*	++			++		+*		+*
PATIL_LIVER_CANCER	MSigDB_C2	7	3.15374	1.9352	0.0146145	0.0170715	YES	+*	+*			++		+*		+*	++	+*
MORF_SOD1	MSigDB_C4	7	3.15148	3.38672	0.0150815	0.0185856	NO	+*	+*			+*		+-	--		+-	+*
Human Breast_Man05_15genes_ER (15692763-Table1)	GeneSigDB	7	3.14429	0.293934	0.025904	0.00572174	YES	+*		+*	+*			+*		+*	+*	+*
Human Testicular_Almstrup05_138genes (15856041-FileS1)	GeneSigDB	7	3.14188	0.5989	0.0107671	0.00886411	YES	+*			+*	+*	+*	+*		+*		+*
PID_IL2_STAT5PATHWAY	MSigDB_C2	7	3.13556	0.856849	0.0207304	0.0153964	YES		+*	+*		+*	+*	+*	+*			+*
MTOR_UP.N4.V1_UP	MSigDB_C6	7	3.13407	0.819379	0.0105784	0.0142022	YES	+*/*+	+*/*+	+*/*+	+*/*+	+*/**		+*/*+				+*/*+
Human StemCell_Almstrup04_138genes (15256440-tableS1)	GeneSigDB	7	3.13359	0.593771	0.0107671	0.00886411	YES	+*			+*	+*	+*	+*		+*		+*
Human Breast_Creighton08_1024genes (18794137-SuppTable1c)	GeneSigDB	7	3.10502	0.506983	0.00409018	0.00374023	YES	++	++	++	++		++	++				+*
Mouse Thymus_Stremmel05_14genes (15812645-Table1)	GeneSigDB	7	3.09212	0.401853	0.0245358	0.00351749	YES	+*	+*	+*	+*			+*			+*	+*
Human Breast_Pothuri10_811genes (20436685-ST4-1)	GeneSigDB	7	3.08761	1.13849	0.00867472	0.00859129	YES	++	++			++	++	+*		+*		++
BIOCARTA_DEATH_PATHWAY	MSigDB_C2	7	3.07642	0.618244	0.0190592	0.0172527	YES	+*	+*	+*		+*	+*	+*		+*
TSAI_RESPONSE_TO_IONIZING_RADIATION	MSigDB_C2	7	3.06747	0.620907	0.00975949	0.0104398	YES	++			+*	+*	++	+*	+*			+*
Human Breast_Charafe-Jauffret06_1233genes (16288205-GeneTable2)	GeneSigDB	7	3.04402	0.713798	0.00700639	0.00975915	YES	++	++		++		++	++		++		++
Human Liver_Li02_36genes (12136251-table5)	GeneSigDB	7	3.04342	0.900606	0.020652	0.0168004	YES	+*	+*	+*		+*		+*		+*		+*
LINDSTEDT_DENDRITIC_CELL_MATURATION_C	MSigDB_C2	7	3.01983	1.19478	0.0204153	0.0184011	YES	+*	+*		+*		++	+*		+*		++
YU_MYC_TARGETS_DN	MSigDB_C2	7	3.01425	0.862988	0.0180154	0.0162122	YES	**/+*	**/+*	**/+*			**/+*	+*/+*		**/+*		**/+*
REACTOME_IL_3_5_AND_GM_CSF_SIGNALING	MSigDB_C2	7	2.99773	1.12439	0.023954	0.0177055	YES	+*	+*	+*				+*	+*		+*	+*
Human Breast_Kim06_33genes_DownRegulated (17178900-Table1b)	GeneSigDB	7	2.99088	0.238428	0.0182442	0.0103333	YES	+*	+*		+*		+*	+*		+*		+*
NFkB_Up_OCILy10_only	SignatureDB	7	2.98928	0.819146	0.0309819	0.0172288	YES		+*		+*	+*		+*		+*	+*	+*
Human Breast_Creighton08_453genes (18794137-SuppTable1d)	GeneSigDB	7	2.98288	0.73071	0.0108492	0.0116356	YES	++	++		++	++	+*	++				++
Human pancreas_Yang09_44genes (17714734-Table4)	GeneSigDB	7	2.95952	0.476618	0.0152361	0.0125383	YES	+*	+*	+*	+*	+*		+*		+*
RODRIGUES_NTN1_AND_DCC_TARGETS	MSigDB_C2	7	2.95023	0.435585	0.0230668	0.0155553	YES	+*	+*	+*	+*		+*			+*		+*
CREIGHTON_ENDOCRINE_THERAPY_RESISTANCE_3	MSigDB_C2	7	2.94633	0.521311	0.00606457	0.00581555	YES	++	++	++	++		++	++				+*
GNF2_RRM1	MSigDB_C4	7	2.93749	3.24569	0.0215744	0.018014	NO		+-			+-	-*	+-	+*		+-	+*
PROTEIN_KINASE_CASCADE	MSigDB_C5	7	2.92859	0.643451	0.010771	0.011891	YES	++	++	+*	+*		++	+*	+*
ENDOPLASMIC_RETICULUM_PART	MSigDB_C5	7	2.9266	0.690046	0.0134111	0.0129926	YES	+*	+*			+*	+*	+*			+*	+*
TTTGCAG,MIR-518A-2	MSigDB_C3	7	2.88046	0.604797	0.0121753	0.00920976	YES		+*		+*	++		+*	+*	+*		+*
MILI_PSEUDOPODIA_HAPTOTAXIS_DN	MSigDB_C2	7	2.87381	1.01325	0.0137578	0.0153252	YES	**/+*	+*/++			+*/++		+*/++		*+/+*	-*/+*	**/+*
ZWANG_CLASS_3_TRANSIENTLY_INDUCED_BY_EGF	MSigDB_C2	7	2.87321	0.971157	0.0175727	0.0149272	YES	+*	++	+*	+*		++			+*		+*
VANASSE_BCL2_TARGETS_UP	MSigDB_C2	7	2.83276	0.626108	0.0285521	0.0160033	YES		++/*+	+*/**	+*/**				++/**	+*/**	+*/**	+*/+*
DEFENSE_RESPONSE	MSigDB_C5	7	2.81885	0.73952	0.0143174	0.012331	YES	+*	+*		+*			+*	+*	+*		+*
KEGG_BASE_EXCISION_REPAIR	MSigDB_C2	7	2.81586	0.690512	0.0222729	0.0143476	YES	+*	+*	+*		+*	+*	+*			+*
Mouse Testicular_Denolet06_509genes (16166195-TableS1a)	GeneSigDB	7	2.7858	0.472556	0.0122228	0.0162144	YES		+*	+*	+*		++	+*		+*		+*
PROTEIN_AMINO_ACID_N_LINKED_GLYCOSYLATION	MSigDB_C5	7	2.77473	0.415897	0.0229941	0.00745617	YES		+*	+*		+*	+*	+*			+*	+*
Human Breast_Speers09_780genes (19808870-ST1)	GeneSigDB	7	2.77232	0.591001	0.00862549	0.00648981	YES	++	++	+*	+*			++		+*	++
TTTGCAC,MIR-19A,MIR-19B	MSigDB_C3	7	2.75604	0.459088	0.00884016	0.00693983	YES	++	++		+*	++	++	++		++
MQ_NFKB	DU_MQ	7	2.74773	0.520961	0.0140195	0.0156625	YES		++		++		++	++	+*	+*		++
Human StemCell_Hao09_612genes (20077526-TableS3)	GeneSigDB	7	2.72155	0.529933	0.0115782	0.0120763	YES	++	++	++		++	++	++				++
Human Pancreas_Rosero10_1018genes (20860821-TableS5)	GeneSigDB	7	2.72097	0.890677	0.0169809	0.0175045	YES	++	++		++		++	+*			++	++
PHOSPHORYLATION	MSigDB_C5	7	2.7201	0.572434	0.012261	0.00954931	YES	+*	++	+*			++	++		+*	++
MORF_PTPN11	MSigDB_C4	7	2.71505	2.21042	0.0111164	0.0136123	NO	+-	+-		+*	+-		+-	-*			+*
MODULE_532	MSigDB_C4	7	2.71222	0.807326	0.0165267	0.0121837	YES	++	++	+*	++		++	++				++
V$IRF_Q6	MSigDB_C3	7	2.67784	0.569456	0.0146397	0.0150427	YES	+*	+*		+*	+*	++	+*	+*
Human Lypmhoma_Leval07_241genes (17284527-TableS4)	GeneSigDB	7	2.66046	0.982778	0.0218396	0.0147812	YES	++	++		++	++	+*	+*				+*
RESPONSE_TO_VIRUS	MSigDB_C5	7	2.63082	0.427387	0.022443	0.0142246	YES	+*	+*			+*		+*	+*		+*	+*
PHOSPHOTRANSFERASE_ACTIVITY_ALCOHOL_GROUP_AS_ACCEPTOR	MSigDB_C5	7	2.61956	0.630476	0.0180336	0.0192377	YES	+*	++	+*			++	++		+*	++
MODULE_237	MSigDB_C4	7	2.57918	0.140424	0.0236606	0.00833596	YES	+*	+*		+*		+*	+*		+*		+*
IL2_UP.V1_UP	MSigDB_C6	7	2.55952	0.528169	0.0206477	0.0145511	YES	++/**	+*/**		+*/**		+*/*+		+*/*+	+*/**		+*/**
Human Sarcoma_Lee04_80genes (15492233-TableS3)	GeneSigDB	7	2.55237	0.435533	0.0225852	0.0122154	YES	+*	+*	+*	+*	+*		+*			+*
MULLIGHAN_MLL_SIGNATURE_2_DN	MSigDB_C2	7	2.54167	0.72882	0.0228827	0.0193986	YES	+*/++	++/++		**/++	*+/++	++/++	+*/++				**/++
LU_EZH2_TARGETS_DN	MSigDB_C2	7	2.53885	0.571699	0.0182304	0.0142552	YES	+*/++		**/++	**/+*	*+/++	-*/++	**/++		**/++
Human Manning02_624genes_ProteinKinases (12471243-TableS2)	GeneSigDB	7	2.53432	0.450143	0.015952	0.0127545	YES	++	++	+*	+*		++	++		++
IMMUNE_SYSTEM_PROCESS	MSigDB_C5	7	2.51876	0.385031	0.0191204	0.0155096	YES		+*	+*	+*			+*	+*	+*		+*
MODULE_459	MSigDB_C4	7	2.49965	0.68039	0.0217836	0.0150792	YES	++	++	+*	++		++	++				++
MODULE_378	MSigDB_C4	7	2.44318	0.674948	0.0241744	0.016744	YES	++	++	+*	++		++	++				++
DAIRKEE_TERT_TARGETS_UP	MSigDB_C2	7	2.38099	1.91008	0.013527	0.0200634	NO		+*/**		-*/**	+*/**	+*/**	+*/*+			+-/**	+*/**
MODULE_317	MSigDB_C4	7	2.37512	0.667897	0.0274743	0.0191432	YES	++	++	+*	++		++	++				++
GINESTIER_BREAST_CANCER_ZNF217_AMPLIFIED_DN	MSigDB_C2	7	0.754268	2.59286	0.0150719	0.0137422	NO	**/+*	**/-*	**/-*		*+/+*		**/+*	**/-*	**/+-
MORF_AP2M1	MSigDB_C4	7	0.151121	2.85915	0.0169474	0.01342	NO	+*		-*			-*	+-	--		+*	-*
Human Lymphoma_Gentles09_780genes (19636063-TableS6)	GeneSigDB	7	-1.59512	3.23805	0.00607665	0.011718	NO	-+		-+	-+	-+	-+	++				-+
CYTOSKELETAL_PART	MSigDB_C5	7	-2.08022	0.265765	0.0212581	0.0118774	YES	-*	-+	-*		-*		-*			-*	-*
BROWNE_HCMV_INFECTION_48HR_DN	MSigDB_C2	7	-2.16269	0.368254	0.020196	0.0153105	YES		+*/-+	**/-+	**/-*	+*/-+	**/-+	+*/-+			**/-+
CYTOSKELETON	MSigDB_C5	7	-2.17721	0.39188	0.0201711	0.0145392	YES	-*	-+	-*		-+		-+			-*	-*
Human Uterine_Santin05_178genes (15785748-Table3)	GeneSigDB	7	-2.33934	0.592624	0.0172118	0.0158179	YES	-+	-+	-+	-*	-+		-+			-+
MOREAUX_MULTIPLE_MYELOMA_BY_TACI_UP	MSigDB_C2	7	-2.42848	0.79555	0.0201638	0.0193073	YES	-*/+*			-*/**	-*/+-		-+/+-	-*/*-		-*/*-	-*/+-
Blood_Module-2.5_Undetermined	SignatureDB	7	-2.82616	0.519943	0.00268417	0.00309853	YES	-*	-*	-*	-*	-*		-+				-*
KEGG_OLFACTORY_TRANSDUCTION	MSigDB_C2	7	-2.84692	0.503872	0.00464645	0.00985406	YES	--	-*			-*	-*	-*	-*		-*
MIKKELSEN_NPC_HCP_WITH_H3K27ME3	MSigDB_C2	7	-3.06539	1.06804	0.00884258	0.0135211	YES	-*	--		-*	--	-*	-*			--
ANATOMICAL_STRUCTURE_DEVELOPMENT	MSigDB_C5	7	-3.42827	1.10354	0.00654783	0.0110633	YES	-+	-+			-+	-+	-+			-*	-+
PUJANA_CHEK2_PCC_NETWORK	MSigDB_C2	6	7.02767	5.73995	0.00498951	0.00792933	YES	++	+*			+-		+-			+-	+*
Human Breast_Reyal05_3373genesSuppTable2SuppTable2 (15735024-SuppTable2)	GeneSigDB	6	6.3531	3.6262	0.00627485	0.015365	YES	+*	++			+*	+-	+-			+*
ACEVEDO_LIVER_TUMOR_VS_NORMAL_ADJACENT_TISSUE_UP	MSigDB_C2	6	6.33145	3.25663	0.00452474	0.0105217	YES	+*/**	+*/**			++/**		+-/**			+*/*+	+*/**
REACTOME_RNA_POL_I_PROMOTER_OPENING	MSigDB_C2	6	6.31841	2.58477	0.00223912	0.00493264	YES		+-			+-		+-	+*		+*	+*
Notch_T-ALL_Palomero_UP	SignatureDB	6	6.18258	2.01946	0.000993543	0.00232213	YES	+*/**	+*/**			+-/**		+-/**			+*/**	+*/**
MARTENS_TRETINOIN_RESPONSE_DN	MSigDB_C2	6	6.15392	3.18225	0.00153064	0.00310214	YES	-*/+-	--/+-			--/+-		-*/+-			-*/+-	--/+*
DANG_BOUND_BY_MYC	MSigDB_C2	6	6.0313	3.07189	0.00047461	0.000923603	YES	+*	+*			+*		+-			+*	+*
ZHANG_TLX_TARGETS_60HR_DN	MSigDB_C2	6	6.01266	2.8082	0.000777882	0.00125591	YES	*+/++	*+/+*			*+/+*		*+/+-			*+/+*	**/+*
REACTOME_TELOMERE_MAINTENANCE	MSigDB_C2	6	5.99996	2.86961	0.00460016	0.00765314	YES		+*			+*		+*	+*		+*	+*
KRCTCNNNNMANAGC_UNKNOWN	MSigDB_C3	6	5.99133	2.24532	0.00453346	0.0108271	YES		+-			+-		+-	+*		+*	+*
Human Breast_Creighton08_952genes (18757322-TableS2)	GeneSigDB	6	5.9458	2.45916	0.000968943	0.00166047	YES	+*	+*			+*		+*	+*			+*
SCGGAAGY_V$ELK1_02	MSigDB_C3	6	5.80955	2.26628	0.00621341	0.0152196	YES	+*	+*	+-		+*		+-			+-
REACTOME_MEIOTIC_RECOMBINATION	MSigDB_C2	6	5.73193	2.79742	0.00800155	0.018643	YES		+-			+-		+-	+*		+-	+*
Serum_response_Fb_UP	SignatureDB	6	5.7024	2.10304	0.000595872	0.00123219	YES	+*/*+	+*/*+			+*/*+		+*/*+			+*/*+	+*/**
ZHANG_RESPONSE_TO_CANTHARIDIN_DN	MSigDB_C2	6	5.68034	1.72811	0.000275829	0.000431291	YES	**/+*	**/+*			+*/+*		+*/+*			**/+*	**/+*
BENPORATH_MYC_MAX_TARGETS	MSigDB_C2	6	5.64686	2.30732	0.000409572	0.000959573	YES	+*	+*			+*		+-			+-	+*
FOURNIER_ACINAR_DEVELOPMENT_LATE_2	MSigDB_C2	6	5.282	3.35343	0.0106403	0.0185662	YES	+*	+*			+*		+*			+*	+*
MORF_BUB3	MSigDB_C4	6	5.27123	3.45841	0.00110615	0.00134039	YES	+*	+*			+-		+-			+-	+-
CHANG_CORE_SERUM_RESPONSE_UP	MSigDB_C2	6	5.2379	2.28877	0.00239608	0.00389081	YES	+*/*+	+*/*+			+*/*+		+*/*+			+*/*+	+*/**
chr3q12	MSigDB_C1	6	5.23462	1.25409	0.00149964	0.00348852	YES	+*	+*			+*	+*	+*				+*
WONG_EMBRYONIC_STEM_CELL_CORE	MSigDB_C2	6	5.20358	3.62388	0.00641101	0.0114585	YES	+*	+*			+*		+-			+*	+*
Human Breast_Larsson07_3085genes (17638893-SuppTable2)	GeneSigDB	6	5.19107	2.17982	0.00353794	0.00865506	YES	++	++			++		+*			++	+*
REACTOME_CHROMOSOME_MAINTENANCE	MSigDB_C2	6	5.14478	2.43412	0.00724021	0.0111946	YES		+*			+*		+*	+*	+*	+*
MORF_EIF3S2	MSigDB_C4	6	5.11634	2.94493	0.00266306	0.00488613	YES	+*	+*			+-		+-			+-	+*
Human Breast_Cicatiello04_52genes (15171711-Table3)	GeneSigDB	6	5.08962	2.22706	0.00195813	0.00300883	YES	+*	+*	+*		+*		+*			++
MODULE_89	MSigDB_C4	6	5.05662	1.79572	0.00702616	0.0140797	YES		+*			+*		+*	+*		+*	+*
Human StemCell_Nuytten08_1622genes (17724462-TableS1)	GeneSigDB	6	4.923	2.40517	0.00437579	0.00771746	YES	++	++		+*	++		+*				+*
REACTOME_AMYLOIDS	MSigDB_C2	6	4.84506	2.13491	0.00943307	0.016165	YES		+-			+*		+*	+*		+*	+*
MODULE_203	MSigDB_C4	6	4.84173	1.54413	0.00482468	0.00694787	YES		+*			+*		+*	+*		+*	+*
CYTOPLASM	MSigDB_C5	6	4.81665	2.51655	0.0109968	0.0190184	YES	++	++	+*	+*	++		+-
MORF_RAD23A	MSigDB_C4	6	4.8088	2.96994	0.00176779	0.00316902	YES	+*	+-			+*		+-			+-	+-
Human Leukemia_Teuffel04_726genes (15257931-SuppTableA)	GeneSigDB	6	4.8034	2.63921	0.00372746	0.00744747	YES	++	++			++		++		++		++
GNF2_PA2G4	MSigDB_C4	6	4.75688	2.73653	0.00327371	0.00447525	YES	+*	+-		+*	+-		+-				+*
Human Breast_Dairkee04_479genes (15260889-TableS2a)	GeneSigDB	6	4.71902	3.96361	0.0022791	0.00476722	NO	+*	+-			+-	--	+-			+-
GOBERT_OLIGODENDROCYTE_DIFFERENTIATION_UP	MSigDB_C2	6	4.68109	2.83334	0.00387323	0.00612807	YES		+*/*+			+*/-+		+*/*+	+*/*+		+*/-+	+*/*+
MODULE_90	MSigDB_C4	6	4.60407	1.48941	0.00646759	0.00945033	YES		+*			+*		+*	+*		+*	+*
BLUM_RESPONSE_TO_SALIRASIB_UP	MSigDB_C2	6	4.56998	1.13996	0.00188705	0.00441347	YES	+*/*+	+*/++	+-/*+		+*/*+		+-/+*				+*/**
NUYTTEN_NIPP1_TARGETS_UP	MSigDB_C2	6	4.5589	1.98603	0.0024707	0.00392717	YES	+*/++	++/+*		+*/**	++/*+	++/*+	+*/++
WONG_MITOCHONDRIA_GENE_MODULE	MSigDB_C2	6	4.55056	2.137	0.0057889	0.00974487	YES	+*	+-			+*		+-			+*	+*
SMID_BREAST_CANCER_NORMAL_LIKE_UP	MSigDB_C2	6	4.5069	1.57313	0.00468841	0.0111788	YES	++/**	++/**	++/**			++/**	++/**				++/**
Human Colon_Grade07_1102genes (17210682-SuppTable3)	GeneSigDB	6	4.49464	2.60252	0.00488735	0.00928131	YES	+*	+*			+*		+*			+-	+*
WELCSH_BRCA1_TARGETS_DN	MSigDB_C2	6	4.4929	0.98403	0.000467354	0.000688188	YES	**/+*	*+/+*			*+/+*		**/+-			*+/+*	**/+*
MITSIADES_RESPONSE_TO_APLIDIN_DN	MSigDB_C2	6	4.49083	3.30661	0.00967275	0.0139745	YES		*+/+*			*+/+*		++/+*		*+/+*	*+/+*	++/+*
Myc_overexpression_2x_UP	SignatureDB	6	4.45288	1.75201	0.00671035	0.0109949	YES	+*/**	+*/**			+-/**	+*/**	+-/**				+*/**
Human Breast_Parker09_1232genes_IntrinsicGenes_hu2006 (19204204-SupplementaryTable1)	GeneSigDB	6	4.42326	2.41748	0.00997685	0.0177941	YES	++	++	+*		++		++				+*
Human Leukemia_Li09_419genes (19755675-TableS6)	GeneSigDB	6	4.4112	1.06651	0.000530491	0.000906662	YES	++	++	+*				++			++	++
Mouse Viral_Pekova09_25genes (19181379-Table2)	GeneSigDB	6	4.40566	1.56422	0.0159721	0.0226158	YES		+*					+*	+*	+*	++	+*
Human Lung_Magda08_23genes (18593933-Table1b)	GeneSigDB	6	4.37934	1.17645	0.0110513	0.0192006	YES	+*	+*			+*		+*	+*			+*
DING_LUNG_CANCER_EXPRESSION_BY_COPY_NUMBER	MSigDB_C2	6	4.3736	1.40122	0.00833488	0.0179726	YES	+*	+*			+*		+*			+*	+*
STAT3_up_OCILy10	SignatureDB	6	4.33922	0.548411	0.00233857	0.00293436	YES		++	+*	+*			+*		+*		+*
STEIN_ESRRA_TARGETS	MSigDB_C2	6	4.32716	1.41089	0.00208279	0.00336049	YES	++	+*		+*	++		+*				+*
Human Lymphoma_Chin09_67genes (19377508-Table2)	GeneSigDB	6	4.31977	1.64168	0.0101253	0.0163532	YES	+*		+*	++				+*	+*		+*
ELVIDGE_HYPOXIA_DN	MSigDB_C2	6	4.2943	1.10213	0.00425721	0.0100637	YES	*+/+*	*+/+*			*+/+*		*+/+*			-+/+*	*+/+*
Human Lymphoma_Lecane05_131genes (16357179-Table2)	GeneSigDB	6	4.28761	1.85871	0.00960887	0.016205	YES	+*	+*			+*		+*		+*		+*
Myeloid_Node1536	SignatureDB	6	4.28075	0.583916	0.00517632	0.00679571	YES	+*	+*					+*	+*	+*		+*
MORF_BUB1B	MSigDB_C4	6	4.24905	1.79439	0.00357843	0.00470795	YES		+*		+*	+-		+*			+-	+*
GRADE_COLON_CANCER_UP	MSigDB_C2	6	4.24337	2.87454	0.00321824	0.004159	YES	+*/**	+*/*+			+*/**		+-/**			+-/**	+*/**
Quiescence_heme_cluster1	SignatureDB	6	4.24082	1.76616	0.00459333	0.00724798	YES	+*	+*	+*			+*	+*				+*
ZHAN_MULTIPLE_MYELOMA_CD2_DN	MSigDB_C2	6	4.22165	1.10228	0.00848062	0.0194698	YES	*+/+*	*+/+*			*+/+*		*+/+*	**/+*			++/+*
Mouse Immune_Carmody02_151genes (12446012-Table2)	GeneSigDB	6	4.22108	1.33383	0.00195496	0.00200748	YES	+-	+*	+*	+*			+*				+*
Quiescence_heme_all	SignatureDB	6	4.21394	1.59194	0.00744442	0.016534	YES	+*		+-			+-	+*		+*		+*
FLECHNER_BIOPSY_KIDNEY_TRANSPLANT_OK_VS_DONOR_UP	MSigDB_C2	6	4.21126	2.07432	0.00372507	0.00409894	YES	++/**	++/**	++/**		++/**		++/**				++/**
TTTNNANAGCYR_UNKNOWN	MSigDB_C3	6	4.20384	1.53583	0.0082767	0.0138297	YES		+*			+*		+*	+*		+*	+*
Human Leukemia_Falt05_50genes_UpRegulatedLgUnmutatedNon-VH3 (15817677-TableS2b)	GeneSigDB	6	4.20302	1.18409	0.0017022	0.00197659	YES	+*	++			++	+*	+*				+*
Human Bladder_Buytaert08_651genes (17952126-SuppTable2)	GeneSigDB	6	4.20202	1.63349	0.00511703	0.0109376	YES	+*	++		+*	++		+*			+*
RAMALHO_STEMNESS_UP	MSigDB_C2	6	4.19987	1.75409	0.00878719	0.0196195	YES	+*/**	+*/**			+*/*+		+*/**		+*/**		+*/**
REACTOME_TRANSCRIPTION	MSigDB_C2	6	4.18747	3.82744	0.00497411	0.0075063	NO		+-		-*	+-		+-	+-		+-
Mouse StemCell_Chambers07_395genes (17676974-TableS5)	GeneSigDB	6	4.18341	2.62539	0.0135588	0.0192521	YES	+*	+*			+*	+*	+*				++
MORF_RAD54L	MSigDB_C4	6	4.17662	2.37097	0.0089543	0.00973563	YES	+*	+*			+-		+-			+-	+*
MULLIGAN_NTF3_SIGNALING_VIA_INSR_AND_IGF1R_UP	MSigDB_C2	6	4.16722	1.1567	0.00659368	0.0101835	YES	+*/**	+*/+*			+*/**	+*/**	+*/**			+*/**
Myeloma_CD-2_subgroup_DN	SignatureDB	6	4.14972	0.988947	0.00844543	0.0194874	YES	*+/+*	*+/+*			*+/+*		*+/+*	**/+*			++/+*
HAMAI_APOPTOSIS_VIA_TRAIL_UP	MSigDB_C2	6	4.14449	2.81456	0.0137206	0.0190161	YES	++/+*	++/+*		++/**	+*/**		++/**		++/**
MORF_HDAC2	MSigDB_C4	6	4.14113	3.24001	0.0144432	0.0195402	YES	+-	+*			+-		+-			+-	+*
BIOCARTA_IL10_PATHWAY	MSigDB_C2	6	4.10766	0.722675	0.0109882	0.0176157	YES	+*	+*	+*	+*					+*		+*
MENSSEN_MYC_TARGETS	MSigDB_C2	6	4.09822	2.37255	0.00888575	0.00877019	YES	+*	+*			+*		+*			+*	+*
REACTOME_N_GLYCAN_ANTENNAE_ELONGATION	MSigDB_C2	6	4.09385	1.39204	0.0143384	0.0138591	YES	+*			+*	+*	+*				+*	++
Human StemCell_Komor05_52genes (15955831-Table7)	GeneSigDB	6	4.08461	0.807496	0.00222923	0.00206481	YES	+-	+*	+*		+*		+*				+*
CHICAS_RB1_TARGETS_SENESCENT	MSigDB_C2	6	4.06752	1.99843	0.00592767	0.00680466	YES	++	++	++	+*			++				++
KIM_MYC_AMPLIFICATION_TARGETS_UP	MSigDB_C2	6	4.04206	1.62632	0.00679392	0.010404	YES	+*/+*	+*/**		+*/++	+*/**		+*/++				+*/+*
BOYAULT_LIVER_CANCER_SUBCLASS_G23_UP	MSigDB_C2	6	4.03206	1.60916	0.00578211	0.00562798	YES	+*/**	+*/**					+*/**	+*/**	+*/**		+*/**
Human Breast_Dairkee04_681genes (15260889-SuppTable2)	GeneSigDB	6	4.0133	3.31685	0.00870916	0.0194702	NO	+*	+*	-*		+*		+*			+*
BROWNE_HCMV_INFECTION_16HR_UP	MSigDB_C2	6	4.01234	1.18009	0.00434786	0.00986074	YES	+*/*+	+*/*+			+*/*+	+*/*+	+*/*+			+*/*+
Mouse StemCell_GarciaEscudero10_371genes_p53 (20630075-AF-2)	GeneSigDB	6	4.00715	1.85609	0.00863007	0.0173542	YES		+*		+*	+-		+-	+-		+-
GNF2_CARD15	MSigDB_C4	6	3.99793	1.25102	0.00632502	0.00883457	YES	+*	+*	+*				+*		+*		+*
MARKEY_RB1_ACUTE_LOF_UP	MSigDB_C2	6	3.99587	1.75419	0.0046856	0.0053247	YES	+*/**	+*/**	+*/**	++/**			++/+*				+*/**
MOOTHA_MITOCHONDRIA	MSigDB_C2	6	3.9858	3.28302	0.00822278	0.0184277	NO	+*	+*			+-	-*	+-				+*
REACTOME_IL_6_SIGNALING	MSigDB_C2	6	3.98306	2.20909	0.0210339	0.0178976	YES	+*	+*	+*	+*			+*			+*
OXFORD_RALA_OR_RALB_TARGETS_UP	MSigDB_C2	6	3.98256	1.47618	0.00856528	0.0106822	YES	+*/**	+*/**			+*/+*		+*/**			+*/**	+*/**
GRADE_COLON_AND_RECTAL_CANCER_UP	MSigDB_C2	6	3.97785	3.99918	0.00853238	0.0166857	NO		+*/+*	-*/**	+*/**	+*/**		+*/**				+*/**
Mouse Lymphoma_Wu08_1813genes (18535662-TableS1a)	GeneSigDB	6	3.9721	1.06177	0.000784884	0.00113617	YES	++	++	++	++			++				++
BOSCO_TH1_CYTOTOXIC_MODULE	MSigDB_C2	6	3.92548	1.10081	0.00401856	0.00639007	YES	+*	+*	+*		+*		+*	+*
NFkB_Up_OCILy3_only	SignatureDB	6	3.91199	1.31929	0.0150139	0.0114273	YES	+*	+*	+*	+*			+*				+*
FUJII_YBX1_TARGETS_DN	MSigDB_C2	6	3.85497	2.87732	0.022238	0.0222819	YES		**/+*			**/+*		**/+*	**/+*		**/+*	**/+*
REACTOME_DESTABILIZATION_OF_MRNA_BY_BRF1	MSigDB_C2	6	3.8546	1.03206	0.00975101	0.0128565	YES	+*	+*			+*		+*	+*		+*
GUTIERREZ_MULTIPLE_MYELOMA_DN	MSigDB_C2	6	3.84165	1.1691	0.0114441	0.0189897	YES	+*	+*			+*		+*	+*	+*
MODULE_189	MSigDB_C4	6	3.82869	1.03185	0.00962024	0.0121445	YES		+*			+*		+*	+*		+*	+*
ONKEN_UVEAL_MELANOMA_UP	MSigDB_C2	6	3.82217	2.52842	0.00931024	0.0107461	YES	++/+*	++/++	++/**				++/++		++/*+		++/++
MORF_GNB1	MSigDB_C4	6	3.81383	2.51322	0.0114142	0.0146291	YES	+*	+*			+*		+-			+*	+*
Human Lymphoma_Rimsza08_36genes (18544678-Table2)	GeneSigDB	6	3.77993	1.63287	0.014136	0.0137569	YES		++		+*	++	++	+*				+*
Human Leukemia_Juric07_617genes (17312329-SuppTable2)	GeneSigDB	6	3.7799	1.13817	0.00191309	0.00187164	YES	++			++		++	++	+*	++
IVANOVA_HEMATOPOIESIS_LATE_PROGENITOR	MSigDB_C2	6	3.77675	1.1453	0.00542589	0.00830057	YES	+*	+*		+*			+*		+*		+*
CYTOPLASMIC_PART	MSigDB_C5	6	3.77439	1.37871	0.00709224	0.0115563	YES	++	+*	+*	+*	++		+-
NUCLEOBASENUCLEOSIDE_AND_NUCLEOTIDE_METABOLIC_PROCESS	MSigDB_C5	6	3.7575	1.15518	0.00956001	0.0142625	YES	+*	+*			+*		+*		+*	+*
BIOCARTA_IL22BP_PATHWAY	MSigDB_C2	6	3.75372	1.46963	0.0190364	0.0187088	YES			+*	+*	+*		+*	+*	+*
CHAUHAN_RESPONSE_TO_METHOXYESTRADIOL_DN	MSigDB_C2	6	3.75053	1.13143	0.00956417	0.0147939	YES	**/+*		**/+*	**/+*			+*/+*			**/+-	**/+*
Human Lung_Coldren06_110genes (16877703-TableS1)	GeneSigDB	6	3.72531	0.972221	0.00973014	0.0149163	YES	+*	+*		+*	+*		+*				+*
KEGG_PYRIMIDINE_METABOLISM	MSigDB_C2	6	3.70763	1.55518	0.0106442	0.0146441	YES	+*	+*			+*		+*		+*	+*
YOSHIMURA_MAPK8_TARGETS_DN	MSigDB_C2	6	3.70442	0.828178	0.0016338	0.00187427	YES	**/+*	**/++	**/++		-*/++		-+/++				**/+*
GEORGES_TARGETS_OF_MIR192_AND_MIR215	MSigDB_C2	6	3.69565	1.4622	0.00581831	0.00916595	YES	++	++		++		+*	++	+*
MORF_RFC1	MSigDB_C4	6	3.68546	1.70206	0.0121426	0.0122927	YES	+-			+*	+-	+*	+-			+*
Human Lymphoma_Cassinelli09_24genes (19555670-Table2a)	GeneSigDB	6	3.68502	0.861919	0.0105719	0.0105746	YES		+*			+*		+*	+*		+*	+*
Human Lymphoma_Cassinelli09_26genes (19555670-Table1a)	GeneSigDB	6	3.68251	0.462499	0.0108926	0.0141671	YES		+*			+*		+*	+*		+*	+*
Human Breast_Teschendorff07_813genes_ERneg (17683518-813GeneTable)	GeneSigDB	6	3.67628	2.01434	0.0153435	0.0186372	YES	++	++		+*	++		++				++
Human Leukemia_Wilson06_50genes_SigDifferentialClusterC (16597596-TableS1-3)	GeneSigDB	6	3.675	0.706307	0.00528211	0.00508216	YES	+*	+*			+*		+*		+*		+*
Mouse StemCell_Lien06_95genes (16618758-SuppTable3)	GeneSigDB	6	3.63974	0.97059	0.00747933	0.0135797	YES	+*	+*			+*	+*	+*				+*
GAVIN_FOXP3_TARGETS_CLUSTER_T4	MSigDB_C2	6	3.63862	0.760533	0.00704387	0.00830469	YES			+*	+*		++	++	+*			+*
TOYOTA_TARGETS_OF_MIR34B_AND_MIR34C	MSigDB_C2	6	3.63803	2.89249	0.0161888	0.0162726	YES		+*		+*	+-		+-		+*	+-
THUM_SYSTOLIC_HEART_FAILURE_UP	MSigDB_C2	6	3.63775	1.53177	0.01008	0.0183355	YES	+*/*+	++/*+	++/*+				++/++		++/*+		++/*+
DANG_REGULATED_BY_MYC_UP	MSigDB_C2	6	3.62554	0.693931	0.00588198	0.00892486	YES	+*/*+	+*/*+			+*/*+		+-/*+			+-/*+	+*/*+
REACTOME_N_GLYCAN_ANTENNAE_ELONGATION_IN_THE_MEDIAL_TRANS_GOLGI	MSigDB_C2	6	3.61477	1.24686	0.0227576	0.0233704	YES				+*	+*	++	+*			+*	++
TRANSCRIPTION_FROM_RNA_POLYMERASE_III_PROMOTER	MSigDB_C5	6	3.5839	1.12321	0.0137837	0.0128575	YES	+*	+*			+*		+*	+*			+*
KUROZUMI_RESPONSE_TO_ONCOCYTIC_VIRUS_AND_CYCLIC_RGD	MSigDB_C2	6	3.58164	1.31494	0.0166819	0.0183097	YES		+*	+*	+*	+*		+*	+*
ZHAN_MULTIPLE_MYELOMA_LB_UP	MSigDB_C2	6	3.57718	0.829179	0.0113342	0.0149147	YES			+*/**	+*/**	+*/*+			+*/**	+*/**		+*/**
TIEN_INTESTINE_PROBIOTICS_6HR_DN	MSigDB_C2	6	3.57397	1.06849	0.00833935	0.0152393	YES	**/+*	**/+*	**/+*		**/+*		**/+*				**/+*
Human ProteinKinases_Frevel03_425genes (12509443-Table2)	GeneSigDB	6	3.56847	1.52779	0.00483863	0.00528604	YES	++	++			++	+*	+*				++
NFkB_Up_K1106	SignatureDB	6	3.56763	0.852963	0.0148167	0.0166038	YES	+*	+*		+*			+*		+*		++
ENK_UV_RESPONSE_EPIDERMIS_UP	MSigDB_C2	6	3.55491	0.996013	0.00612606	0.00932105	YES	++/++	++/++		+*/+*			+*/++			+*/*+	++/+*
Human Leukemia_Vallat03_31genes (12586635-Figure1ca)	GeneSigDB	6	3.55459	0.399176	0.00759508	0.00479243	YES	+*	+*		+*			+*			+*	+*
Plasma_cell_gt_B_cell	SignatureDB	6	3.53736	1.14043	0.00838441	0.0180643	YES	+*	+*	+*				++			++	+*
LTE2_UP.V1_UP	MSigDB_C6	6	3.53685	0.908004	0.00460717	0.00564573	YES	++/**	++/+*	+*/**	+*/+*		++/++					++/**
MORF_AATF	MSigDB_C4	6	3.52631	3.51826	0.00572723	0.00780735	NO	+-		--		+-		+-			+-	+-
Human BoneMarrow_Mahtouk07_41genes (17339423-Table1)	GeneSigDB	6	3.51999	0.66052	0.0123519	0.0121711	YES	+*		+*	+*			+*			+*	+*
Human StemCell_Macaulay07_298genes (17192395-TableS2c)	GeneSigDB	6	3.5192	0.661399	0.00316027	0.00481439	YES	++	++		+*				+*		+*	++
Mouse Lung_Rangasamy09_2003genes (19286929-SuppTable1)	GeneSigDB	6	3.51211	1.45842	0.00650252	0.00862361	YES	++	++	++	+*			++				++
Human Leukemia_Kiiveri08_100genes_MLLParallel (18410693-TableS12)	GeneSigDB	6	3.50114	0.859093	0.00652256	0.00677805	YES	+*	+*		+*	++		+*	+*
HESS_TARGETS_OF_HOXA9_AND_MEIS1_UP	MSigDB_C2	6	3.49157	0.933716	0.00653874	0.00624397	YES	+*/**	+*/*+			+*/**		+*/**			+*/*+	+*/+*
Human Embryo_Heim07_1650genes (17880687-TableS1)	GeneSigDB	6	3.49021	1.2335	0.00853282	0.0128878	YES	++	++		+*		++	++				++
WIELAND_UP_BY_HBV_INFECTION	MSigDB_C2	6	3.48569	2.44344	0.0222431	0.0191011	YES	+*	+*			+*		+-	+*			+*
SANSOM_APC_TARGETS_REQUIRE_MYC	MSigDB_C2	6	3.474	1.21069	0.010226	0.0143175	YES	+*	+*		+*	+-		+*			+-
MOHANKUMAR_TLX1_TARGETS_UP	MSigDB_C2	6	3.44768	1.04607	0.00763939	0.0118242	YES	+*/*+	++/*+			++/-+		+*/-+			++/-*	+*/**
Human Breast_Sotiriou03_485genes_Survival (12917485-Table9)	GeneSigDB	6	3.44713	0.958625	0.00854774	0.0168243	YES	+*	+*			+*		+*			+*	+*
DER_IFN_BETA_RESPONSE_UP	MSigDB_C2	6	3.44707	1.12393	0.0105268	0.0193709	YES	+*/**	+*/**			++/**	++/**	+*/**				+*/**
LINDSTEDT_DENDRITIC_CELL_MATURATION_B	MSigDB_C2	6	3.44405	1.04923	0.0139774	0.0185503	YES	++		+*			+*	+*			++	++
Mouse Leukemia_Lin05_59genes (16103065-Table2)	GeneSigDB	6	3.44131	0.951071	0.0129374	0.0162339	YES	+*	+*		+*	+-		+*				+*
Human Breast_Horlings10_183genes (20068109-SuppTable4)	GeneSigDB	6	3.42479	1.08109	0.00779601	0.0108661	YES	+*	+*	+*		+*		+*				+*
Mouse Skin_Schlingemann03_46 (12640676-Table3)	GeneSigDB	6	3.42313	1.08175	0.0140493	0.0139492	YES	+*	+*					+*		+*	+*	+*
ODONNELL_TARGETS_OF_MYC_AND_TFRC_UP	MSigDB_C2	6	3.42254	1.12958	0.0127852	0.0123701	YES			+*/**	++/**		++/**	++/+-		++/**		++/**
BROWNE_HCMV_INFECTION_48HR_UP	MSigDB_C2	6	3.40899	0.576784	0.00328892	0.0041663	YES	++/*+	+*/-+			+*/-+		+*/-+	+*/**	+*/*+
NUCLEOTIDE_METABOLIC_PROCESS	MSigDB_C5	6	3.4006	0.549541	0.0107676	0.0174437	YES	+*	+*			+*		+*		+*		+*
SCHLINGEMANN_SKIN_CARCINOGENESIS_TPA_UP	MSigDB_C2	6	3.39607	0.982452	0.0134866	0.0152223	YES	+*/*+	+*/*+					+*/*+		+*/*+	+*/*+	+*/**
Plasma_cell_gt_mature_Bcell	SignatureDB	6	3.39527	0.48988	0.0104897	0.00994336	YES		+*		+*			+*	+*	+*		+*
Human StemCell_Komor05_58genes (15955831-SuppTable2)	GeneSigDB	6	3.39125	1.01965	0.0133047	0.0156141	YES		+*		+*	+*	+*				+*	+*
SUNG_METASTASIS_STROMA_DN	MSigDB_C2	6	3.38525	1.09055	0.0133605	0.0157233	YES	*+/+*	*+/+*			*+/+*		*+/+*			*+/+*	**/+*
Mouse StemCell_Forsberg05_25genes (16151515-TableS5)	GeneSigDB	6	3.37555	0.957798	0.0245151	0.022517	YES	+*	+*	+*			+*	++				+*
REGULATION_OF_TYROSINE_PHOSPHORYLATION_OF_STAT_PROTEIN	MSigDB_C5	6	3.36837	0.799687	0.0290185	0.0145231	YES		+*	+*	+*	+*				+*	+*
TONKS_TARGETS_OF_RUNX1_RUNX1T1_FUSION_HSC_DN	MSigDB_C2	6	3.36493	0.789456	0.0061457	0.00859506	YES	++/+*	++/++	*+/+*				++/++	**/+*			*+/+*
Resting_blood_B_cell_GNF	SignatureDB	6	3.36291	0.458057	0.00423875	0.00288026	YES		++		++	++	++	++				++
Human Breast_Lee10_25genes (20068086-ST1-2)	GeneSigDB	6	3.35329	1.05088	0.018	0.0187939	YES	+*	+*		+*	+*	+*			+*
Human Ovarian_Ouellet05_137genes (15940270-Figure1D)	GeneSigDB	6	3.33657	1.9244	0.0160602	0.0136399	YES	++	+*		+*	+*		+*				+*
MATTIOLI_MGUS_VS_PCL	MSigDB_C2	6	3.33586	1.59836	0.013286	0.014053	YES	+*	+*			++		+*			++	+*
Mouse Skin_SuryoRahmanto07_50genes (17449903-Table2)	GeneSigDB	6	3.32474	0.672299	0.0126171	0.0111164	YES	+*		+*	+*		+*			++		+*
CHEN_HOXA5_TARGETS_9HR_DN	MSigDB_C2	6	3.32035	0.874692	0.0157092	0.0190778	YES	*+/+-	+*/+*					+*/+*		**/+*	*+/+*	**/+*
HEDENFALK_BREAST_CANCER_HEREDITARY_VS_SPORADIC	MSigDB_C2	6	3.31639	1.13668	0.015063	0.0166469	YES	+*	+*			+*	+*	+*				+*
Human Colon_Dessein10_744genes (20460542-SuppTable1)	GeneSigDB	6	3.30236	0.735779	0.00532549	0.0106554	YES	++	++		+*	++	++	++
Human Sarcoma_Lee04_335genes (15492233-TableS1)	GeneSigDB	6	3.29008	1.09595	0.0104773	0.0144578	YES	+*	+*			++		++		+*	+*
MITOCHONDRION	MSigDB_C5	6	3.28248	2.9126	0.00747418	0.0115597	NO	+*	+*			+*		+-	-*			+*
HOXA9_DN.V1_DN	MSigDB_C6	6	3.26339	0.937794	0.0110465	0.0165245	YES	+*/+*	+*/++					+*/+*		**/+*	*+/+*	+*/+*
Human Prostate_Nanni06_70genes (16513839-Table3)	GeneSigDB	6	3.25408	0.997396	0.0149888	0.0160034	YES		+*		+*	+-		+*	+*			+*
EINAV_INTERFERON_SIGNATURE_IN_CANCER	MSigDB_C2	6	3.24985	0.844145	0.0165835	0.00804897	YES		+*		+*		+*	+*		+*		+*
TRANSFERASE_ACTIVITY_TRANSFERRING_GLYCOSYL_GROUPS	MSigDB_C5	6	3.24872	0.898063	0.0102455	0.0106993	YES	+*				+*	++	+*			+*	++
Human Breast_Reyal08_159genes (19014521-TableS6b)	GeneSigDB	6	3.24448	0.79351	0.00907213	0.0111288	YES		++				++	++	+*	++		+*
REACTOME_REGULATION_OF_MRNA_STABILITY_BY_PROTEINS_THAT_BIND_AU_RICH_ELEMENTS	MSigDB_C2	6	3.24037	1.08923	0.0120607	0.0141018	YES	+*	+*			+*		+*	+*		+*
Human Prostate_Wallace08_489genes (18245496-SuppTable2)	GeneSigDB	6	3.2396	1.23219	0.0136609	0.0164998	YES	++	++	+*				++	++			++
Mouse Brain_DeSmaele07_122genes (18231642-TableW1)	GeneSigDB	6	3.2336	1.83393	0.0190712	0.013674	YES	+*	+*					+*	+*	+*	+*
WALLACE_PROSTATE_CANCER_RACE_UP	MSigDB_C2	6	3.22601	1.20998	0.0118692	0.0151742	YES	++/**	++/**	+*/**				++/**	++/**			++/**
chr18q12	MSigDB_C1	6	3.22402	0.751781	0.0114312	0.0135691	YES	+*	+*			+*	+*	+*			+*
NEGATIVE_REGULATION_OF_APOPTOSIS	MSigDB_C5	6	3.21294	1.48071	0.012139	0.00934851	YES	+*	+*	+*				+*	+*			+*
Human Leukemia_Ruiz-Vela08_468genes (18032706-SuppTable3)	GeneSigDB	6	3.20346	1.12911	0.0133127	0.0190166	YES	+*	+*			+*		+*		+*		+*
GENTILE_UV_RESPONSE_CLUSTER_D2	MSigDB_C2	6	3.20307	0.8636	0.0116347	0.00978783	YES	+*	+*	+*		+*		+*				+*
HOSHIDA_LIVER_CANCER_SUBCLASS_S1	MSigDB_C2	6	3.20253	0.558816	0.00574224	0.00750487	YES	++	++	++				++		+*		+*
WANG_TUMOR_INVASIVENESS_DN	MSigDB_C2	6	3.19973	1.27253	0.0124602	0.0167068	YES	+*/+*	++/+*			+*/++		+*/+*	**/+*			*+/+*
Human Breast_Barry10_1022genes (20368555-TS-1)	GeneSigDB	6	3.19587	2.1811	0.0199015	0.0163602	YES	++	++			++		+*	+*	++
NEGATIVE_REGULATION_OF_PROGRAMMED_CELL_DEATH	MSigDB_C5	6	3.17537	1.47953	0.0130047	0.0101051	YES	+*	+*	+*				+*	+*			+*
Human Cervical_Rosty05_814genes (15869706-TableS2)	GeneSigDB	6	3.17532	1.03133	0.00962236	0.0157626	YES		++	++			++	++		++		+*
STARK_PREFRONTAL_CORTEX_22Q11_DELETION_UP	MSigDB_C2	6	3.17274	0.592332	0.00701259	0.00781633	YES	++/+*			+*/**		++/*-	++/+-		++/**		++/**
Mouse StemCell_Forsberg05_413genes (16151515-TableS1)	GeneSigDB	6	3.16639	1.76608	0.0167201	0.0145957	YES	+*	+*			+*		+*		++		++
YAO_TEMPORAL_RESPONSE_TO_PROGESTERONE_CLUSTER_8	MSigDB_C2	6	3.15886	1.22418	0.0185454	0.0176987	YES	++	++		++	++		++				+*
SMITH_TERT_TARGETS_UP	MSigDB_C2	6	3.15867	1.04143	0.0150528	0.0160549	YES	+*/++	+*/*+					+*/**	+*/**		+*/*+	+*/+*
REACTOME_INTERFERON_GAMMA_SIGNALING	MSigDB_C2	6	3.14951	1.40372	0.0223501	0.0194588	YES	+*	+*		+*	++		+*		+*
LEE_CALORIE_RESTRICTION_MUSCLE_DN	MSigDB_C2	6	3.13257	0.571987	0.011616	0.00945182	YES	**/+*	**/+*	**/+*		**/+*		+*/+*				**/+*
STK33_DN	MSigDB_C6	6	3.12648	0.763612	0.0106016	0.0148741	YES	+*/+*	++/++	**/+*	**/+*				**/++			+*/++
NEGATIVE_REGULATION_OF_NUCLEOBASENUCLEOSIDENUCLEOTIDE_AND_NUCLEIC_ACID_METABOLIC_PROCESS	MSigDB_C5	6	3.1229	0.597968	0.00800055	0.0132804	YES	+*	+*		+*	+*	+*	++
E2F1_UP.V1_UP	MSigDB_C6	6	3.1071	0.997125	0.0147659	0.0190407	YES	+*/*+	+*/*+			+*/*+		+*/*+	+*/*+	+*/**
DAZARD_UV_RESPONSE_CLUSTER_G6	MSigDB_C2	6	3.10197	0.854572	0.0127579	0.0183915	YES	++			++	++	++	++				++
HUANG_GATA2_TARGETS_UP	MSigDB_C2	6	3.09924	0.680471	0.0105872	0.0152776	YES	+*/*+	+*/**		++/**		++/**	++/**				++/**
AGTCTTA,MIR-499	MSigDB_C3	6	3.09594	0.375954	0.0113579	0.0108295	YES	+*	++	+*	+*			+*				+*
Mouse Leukemia_Walter04_85genes (15572690-SuppTable4)	GeneSigDB	6	3.07347	0.641517	0.0149275	0.0182031	YES	+*				+*	+*	+*		+*		+*
ENDOPLASMIC_RETICULUM	MSigDB_C5	6	3.06818	1.05396	0.0140099	0.0168176	YES	+*	+*	++		+*					++	+*
ONO_FOXP3_TARGETS_UP	MSigDB_C2	6	3.06443	0.895495	0.0244666	0.0172771	YES	+*/**	+*/**	+*/**	+*/**			+*/**	+*/**
Human Colon_Mariadason03_420genes (14695196-Table2)	GeneSigDB	6	3.05087	0.950691	0.0153761	0.0201291	YES	+*	+*	+*		+*		+*				+*
Human Pancreas_Nakamura04_168genes (14767473-Table3)	GeneSigDB	6	3.04992	0.528683	0.00916368	0.0113909	YES	+*	+*		+*		+*	+*				+*
Human Bladder_Buytaert08_832genes (17952126-SuppTable1)	GeneSigDB	6	3.04783	1.23397	0.0176666	0.0200608	YES	++	++	+*		++	++	++
Human Messina_04_1962genes_TranscriptionFactors (15489324-TableS2)	GeneSigDB	6	3.04645	1.35912	0.0121515	0.0122594	YES	+*	+*			+*	+*	+*		+*
APOPTOSIS_GO	MSigDB_C5	6	3.04635	0.926116	0.0095201	0.00997015	YES	+*		+-		+*		+*	+*			+*
Human Testicular_Sugimura04_31genes (15073113-Table1)	GeneSigDB	6	3.04141	0.796508	0.0270841	0.018148	YES	+*	+*	+*			+*			+*		+*
PROGRAMMED_CELL_DEATH	MSigDB_C5	6	3.03517	0.931846	0.00983168	0.0102636	YES	+*		+-		+*		+*	+*			+*
GNF2_SMC4L1	MSigDB_C4	6	3.03047	3.51557	0.0186114	0.0178506	NO		+-			+-	-*	+-			+-	+*
Human Lung_Tahir10_14genes (20179162-Table1)	GeneSigDB	6	3.00726	0.425269	0.0241234	0.014395	YES	+*	+*	+*		+*		+*				+*
ISOMERASE_ACTIVITY	MSigDB_C5	6	3.00714	0.580679	0.0186336	0.016528	YES	+*			+*	+*		+*		+*	+*
ELVIDGE_HIF1A_TARGETS_UP	MSigDB_C2	6	3.00653	0.905304	0.0179783	0.0190256	YES	+*/**	+*/*+			+*/*+		+*/**			++/-+	+*/**
Thymic_DP_Tcell_gt_Thymic_SP_CD4+Tcell	SignatureDB	6	3.00012	0.626156	0.0132166	0.0116019	YES	+*	++		+*		+*	+*				+*
Human pancreas_Miyake06_52genes (16699793-Table1)	GeneSigDB	6	2.99675	0.430815	0.0131983	0.00926413	YES	+*		+*		+*		+*			+*	+*
BUYTAERT_PHOTODYNAMIC_THERAPY_STRESS_UP	MSigDB_C2	6	2.98314	1.17688	0.0179925	0.0197061	YES	++/+*	++/++	+*/**		++/++	++/*+	++/+*
Human Breast_Parker09_161genes_IntrinsicGenes_RTPCR (19204204-SupplementaryTable4)	GeneSigDB	6	2.97329	0.982716	0.0170837	0.0196765	YES	+*	+*				+*	++			+*	+*
JUBAN_TARGETS_OF_SPI1_AND_FLI1_UP	MSigDB_C2	6	2.96978	0.421404	0.0102376	0.013602	YES	+*/**	++/++	+*/+*			+*/**	+*/+*			+*/**
REGULATION_OF_APOPTOSIS	MSigDB_C5	6	2.94958	0.792369	0.0135477	0.0190786	YES	+*	+*	+-				+*	+*			+*
LIU_CMYB_TARGETS_UP	MSigDB_C2	6	2.94549	0.656326	0.0119297	0.0141669	YES	++/+*	++/**	+*/**				++/**			++/*+	++/**
NEGATIVE_REGULATION_OF_TRANSCRIPTION	MSigDB_C5	6	2.93266	0.723291	0.0120739	0.017231	YES	+*	+*			+*	+*	++	+*
GLUTAMINE_FAMILY_AMINO_ACID_METABOLIC_PROCESS	MSigDB_C5	6	2.93265	0.555224	0.0255719	0.0120406	YES	+*	+*			+*		+*			+*	+*
LINDGREN_BLADDER_CANCER_CLUSTER_2A_DN	MSigDB_C2	6	2.93153	0.767236	0.0178672	0.0214174	YES	**/++	**/++		**/+*			**/++		**/++		**/++
KIM_MYC_AMPLIFICATION_TARGETS_DN	MSigDB_C2	6	2.93095	0.987549	0.0187487	0.0168603	YES	+*/+*			+*/++		**/+*	+*/++	**/+*			+*/+*
MARSON_FOXP3_TARGETS_STIMULATED_UP	MSigDB_C2	6	2.91317	0.456721	0.0236749	0.00679042	YES		+*/**	+*/**	+*/*+			+*/*+		+*/**		+*/**
Human Embryo_Heim07_49genes (17880687-Table1)	GeneSigDB	6	2.89515	0.735699	0.0232294	0.0185462	YES	+*	+*		+*			+*		+*		+*
Mouse Lung_Rangasamy09_1540genes (19286929-SuppTable2q)	GeneSigDB	6	2.88978	1.56181	0.0186024	0.0189186	YES	++	++		+*	++	+*	++
SMID_BREAST_CANCER_BASAL_UP	MSigDB_C2	6	2.87688	1.07814	0.0170844	0.0191281	YES	+*/-+	+*/-+	+*/*+				++/-+	+*/*+			+*/*+
Human Breast_Troester06_436genes-up-DOX-ZR75-1 (17150101-TableS1l)	GeneSigDB	6	2.87237	3.08093	0.00942807	0.010441	NO		+*			+*	-*	+*			+*	+*
VANTVEER_BREAST_CANCER_ESR1_UP	MSigDB_C2	6	2.86842	1.27021	0.0209682	0.0177099	YES	++/+*	++/+*			++/**	+*/*+				+*/*+	+*/+*
Human Lymphoma_Zhu05_61genes (15897243-Table1)	GeneSigDB	6	2.86303	0.797516	0.0215842	0.0160917	YES		+*	+*		+*		+*			+*	++
KIM_WT1_TARGETS_UP	MSigDB_C2	6	2.86228	1.02476	0.0202982	0.0193681	YES	++/*+			+*/**	++/++	++/**			++/**		++/+*
GOLGI_APPARATUS_PART	MSigDB_C5	6	2.86005	0.306278	0.0117566	0.00859396	YES	+*		+*	+*	+*	+*	+-
EGFR_UP.V1_DN	MSigDB_C6	6	2.85214	0.270635	0.00895124	0.0088123	YES		*+/++		+*/+*	*+/++		++/++			*+/++	++/++
ACTAYRNNNCCCR_UNKNOWN	MSigDB_C3	6	2.83506	0.774086	0.0155879	0.0213107	YES	+*	+*			+-		+-	+-		+-
Human Colon_Dessein10_211genes (20460542-SuppTable2)	GeneSigDB	6	2.8206	0.834501	0.0168759	0.0208847	YES	++			+*	++	++	++			++
IMMUNE_RESPONSE	MSigDB_C5	6	2.81378	0.64413	0.0165276	0.0139108	YES		+*	+*	+*			+*		+*		+*
Mouse Breast_Crawford07_758genes (18081427-TableS7)	GeneSigDB	6	2.80206	2.69249	0.00691465	0.00943694	NO	+*	+*			+*		+*	-*			+*
Mouse StemCell_Ulloa-Montoya07_775genes (17683608-TableS4)	GeneSigDB	6	2.79974	0.784954	0.0132615	0.0138498	YES	+*	++	+*			++	++				++
Human StemCell_Udayakumar06_458genes (16574658-SuppTable1)	GeneSigDB	6	2.78715	1.32156	0.0228868	0.0203869	YES	++	++	+*		++		++		++
V$AR_01	MSigDB_C3	6	2.77427	0.631595	0.0153056	0.0154041	YES	+*	+*		+*	+*		+*		+*
V$MAX_01	MSigDB_C3	6	2.77231	0.562816	0.0135905	0.0121775	YES	+-		+*		+*		+*		+*		+*
GNF2_CD14	MSigDB_C4	6	2.77004	0.507935	0.0275191	0.0132663	YES	+*	+*		+*			+*		+*		+*
SENESE_HDAC3_TARGETS_UP	MSigDB_C2	6	2.76399	1.21632	0.0204629	0.0162484	YES	+*/*+	++/++	++/**	+*/**		++/*+	++/++
Human Leukemia_Kiiveri08_100genes_E2A-PBX1Tree (18410693-TableS4)	GeneSigDB	6	2.7599	0.836721	0.0216282	0.019259	YES	++	++	++		++	++				++
Human Lymphoma_VanLoo09_407genes (19797726-SuppTable1b)	GeneSigDB	6	2.75907	4.22168	0.00632544	0.00730971	NO	+-	+-				-+	+-			-+	+*
LIU_VMYB_TARGETS_UP	MSigDB_C2	6	2.75792	0.686119	0.015688	0.0136309	YES	++	++	+*	+*	++		++
TTGCCAA,MIR-182	MSigDB_C3	6	2.75634	0.746863	0.0172511	0.017474	YES	++	++				++	++		++		++
E2F3_overexpression_2x_up	SignatureDB	6	2.74317	0.431331	0.0164329	0.0117942	YES		+*	+*	+*			++		+*		+*
BROWN_MYELOID_CELL_DEVELOPMENT_UP	MSigDB_C2	6	2.73902	0.515154	0.0147861	0.0111862	YES	+*/+*	+*/+*	+*/**				++/+*		+*/**		+*/**
Human MultipleMyeloma_Gutierrez10_178genes (20054351-TableS4)	GeneSigDB	6	2.69874	0.465519	0.0182332	0.0159345	YES	+*	++	+*				+*		++	++
MULLIGHAN_NPM1_SIGNATURE_3_DN	MSigDB_C2	6	2.6925	0.398885	0.0161815	0.0132106	YES	*+/+*		**/+*	**/+-		*+/+*	++/++				*+/+*
IRF3_target_gene	SignatureDB	6	2.68341	0.679956	0.0200597	0.0177729	YES	++	++		+*			++	+*			++
TGTTTAC,MIR-30A-5P,MIR-30C,MIR-30D,MIR-30B,MIR-30E-5P	MSigDB_C3	6	2.67866	0.577896	0.0125373	0.0102022	YES	++		++	+*			++		++		++
REACTOME_METABOLISM_OF_AMINO_ACIDS_AND_DERIVATIVES	MSigDB_C2	6	2.66121	0.51521	0.014452	0.0143015	YES	+*	+-			+*		+*			+*	+*
Blood_Module-3.2_Inflammation-1	SignatureDB	6	2.64315	0.592131	0.0196044	0.0211316	YES	+*	++	+*	+*	++				+*
MORF_PSMF1	MSigDB_C4	6	2.64079	0.48462	0.0149305	0.0143978	YES	+*	+*			+-	+*	+*			+-
PROTEIN_PROCESSING	MSigDB_C5	6	2.63426	0.345013	0.022093	0.00678824	YES	+*	+*	+*	+*		+*	+*
BHAT_ESR1_TARGETS_NOT_VIA_AKT1_UP	MSigDB_C2	6	2.62414	0.563923	0.0184	0.0151814	YES	+*/*+	+*/*+	++/**	++/**		++/++					++/**
MORF_BRCA1	MSigDB_C4	6	2.62258	0.541658	0.014911	0.0125893	YES	+*	+*	+*		+-	+*	+*
MORF_PRKAG1	MSigDB_C4	6	2.61985	2.45829	0.0142608	0.0193098	NO	+*	+*			+*		+-	-*		+-
Human Breast_Kreike07_3712genes_Basal_mets (17910759-TableS5)	GeneSigDB	6	2.61474	3.21885	0.011975	0.00885839	NO	++	++			++		++		-+		++
Human Brain_DePreter10_42genes (20179214-Table2)	GeneSigDB	6	2.61203	0.526098	0.025034	0.011628	YES	+*	+*				+*	+*			+*	+*
KINASE_ACTIVITY	MSigDB_C5	6	2.60868	0.343102	0.0120223	0.00924414	YES	+*	++	+*				++		+*	++
Human Breast_Waddell08_200genes_BRCA1missense (18497862-TableS2)	GeneSigDB	6	2.59098	0.590207	0.020664	0.0150738	YES	+*		+*		+*		+*			+*	+*
NEGATIVE_REGULATION_OF_CELLULAR_METABOLIC_PROCESS	MSigDB_C5	6	2.58188	0.499179	0.0165407	0.0171524	YES	+*	++		+*	++	+*	++
TGAATGT,MIR-181A,MIR-181B,MIR-181C,MIR-181D	MSigDB_C3	6	2.57897	0.456759	0.0146634	0.00948774	YES		++	++	+*		++	++				++
MODULE_44	MSigDB_C4	6	2.53162	0.786521	0.0247621	0.0189421	YES		++		+*		++	++			++	++
IL15_UP.V1_UP	MSigDB_C6	6	2.52642	0.462997	0.0220526	0.0164637	YES	+*/**	+*/*+		+*/*+		+*/*+		+*/*+	+*/*+
NEGATIVE_REGULATION_OF_CELLULAR_PROCESS	MSigDB_C5	6	2.44419	0.499466	0.0173298	0.0158571	YES	+*	++			++	+*	++				+*
MCBRYAN_PUBERTAL_BREAST_4_5WK_DN	MSigDB_C2	6	2.4125	0.204519	0.0213753	0.0108852	YES	*+/+*	-+/+*	*+/+*	**/+*			*+/+*				**/+*
ACCAAAG,MIR-9	MSigDB_C3	6	2.39078	0.304963	0.0174353	0.00852442	YES	++	+*		+*		++	++		+*
WAMUNYOKOLI_OVARIAN_CANCER_LMP_UP	MSigDB_C2	6	2.3867	0.346051	0.0187725	0.0110931	YES	+*/*+	+*/*+	+*/*+		+*/*+		+*/*+			+*/*+
MORF_RUNX1	MSigDB_C4	6	2.36923	0.675314	0.0309991	0.0212817	YES	+*		+*		+-	+*	+*			+-
PROTEIN_SERINE_THREONINE_KINASE_ACTIVITY	MSigDB_C5	6	2.35108	0.339652	0.0245861	0.0148923	YES		+*	+*			++	+*		+*	++
TGACATY_UNKNOWN	MSigDB_C3	6	2.31659	0.470648	0.0238645	0.0178098	YES	++	++	++	+*		++			++
Human Leukemia_Erkeland06_199genes (16423987-SuppTable3d)	GeneSigDB	6	2.30982	0.448427	0.0363447	0.0131267	YES	+*	+*			+*	++			++		+*
Human Breast_van'tVeer02_430genes_ERgenes (11823860-SuppTable4)	GeneSigDB	6	2.20037	0.132813	0.0257937	0.00876025	YES	++	++	++	+*			++				++
PROTEIN_KINASE_ACTIVITY	MSigDB_C5	6	2.19325	0.351227	0.0295991	0.0137167	YES	+*		+*			++	++		+*	++
KEEN_RESPONSE_TO_ROSIGLITAZONE_DN	MSigDB_C2	6	1.88266	1.87727	0.0247749	0.016906	NO	**/++	**/++	**/++				**/++	**/-*			**/+*
RPS14_DN.V1_UP	MSigDB_C6	6	1.56304	1.88963	0.0233705	0.0137833	NO		+*/+*	+*/**	+*/**			++/+*			-+/*-	+*/**
Mouse Viral_Mendoza-Villanueva08_1830genes (19036130-TableS1a)	GeneSigDB	6	1.41695	2.6624	0.0189397	0.0176976	NO	++	++			-+		++			-+	++
MODULE_75	MSigDB_C4	6	1.3435	2.84608	0.0105408	0.0109054	NO			+*		-+		++	+*		-+	+*
MODULE_46	MSigDB_C4	6	1.13446	2.67337	0.0174692	0.017031	NO			+*		-*		++	+*		-+	+*
Rat Hypothalamic_Mansuy10_1270genes (20937356-TableS1)	GeneSigDB	6	0.90104	2.4124	0.0180747	0.0149875	NO	++			++	-+	++	-+				++
MORF_NPM1	MSigDB_C4	6	-0.68171	2.79383	0.0324997	0.0174219	NO	-*	-*	-*				+-	--			-*
ATF2_S_UP.V1_DN	MSigDB_C6	6	-2.12373	0.408733	0.0235306	0.0167204	YES	**/-+	**/-+			**/-+		**/-+	+*/-*		**/-+
Human Sarcoma_Missiaglia10_212genes (20502458-TableS6b)	GeneSigDB	6	-2.16329	0.253138	0.017058	0.0131762	YES	-+	-+	-*			-+	-+			-+
STRUCTURAL_MOLECULE_ACTIVITY	MSigDB_C5	6	-2.17086	0.427195	0.0210263	0.018422	YES	-*	-+	-*	-*					-*	-*
GNF2_HPN	MSigDB_C4	6	-2.34174	0.614482	0.0196618	0.0186878	YES	-*	-*			-*	-*	-*			-*
Human Intestine_Vecchi07_415genes (17297478-SuppTable2)	GeneSigDB	6	-2.39787	0.745826	0.0205959	0.0214052	YES	-+	-+			-+		-+	-*		-+
EXTRACELLULAR_REGION_PART	MSigDB_C5	6	-2.49061	0.575466	0.0127352	0.0157571	YES	-+	-+			-+	-+	-+			-+
NEUROLOGICAL_SYSTEM_PROCESS	MSigDB_C5	6	-2.49227	0.628039	0.0132211	0.0155351	YES		-*	-*		-*		-+			-*	-*
ORGAN_DEVELOPMENT	MSigDB_C5	6	-2.55904	0.706858	0.0142497	0.0190843	YES	-*	-+			-+	-+	-+			-+
MEISSNER_BRAIN_HCP_WITH_H3K27ME3	MSigDB_C2	6	-2.57093	0.645549	0.0102648	0.0112881	YES	-*	--			--		-*	-*		--
JAEGER_METASTASIS_DN	MSigDB_C2	6	-2.69222	0.770764	0.0123744	0.0175885	YES	*+/-*	*+/-*			*+/-*		++/-+		*+/-*	*+/-*
Human MesenchymalStemCells_Yamamoto08_1252genes (18318837-TableS1)	GeneSigDB	6	-2.69555	0.857967	0.0125633	0.0174331	YES	-+				-*	-+	-+			-+	-*
REACTOME_OLFACTORY_SIGNALING_PATHWAY	MSigDB_C2	6	-2.73745	0.40539	0.00257892	0.00258196	YES	-*	-*			-*	-*	-*	--
GC_B_cell_BL_equal_DLBCL	SignatureDB	6	-2.82301	0.575685	0.0073189	0.0156094	YES	-+	-+			-+	-+	-+			-+
MODULE_220	MSigDB_C4	6	-2.89087	0.651057	0.00696335	0.0142557	YES		-+	-+		-+	-+	-+			-+
SYSTEM_PROCESS	MSigDB_C5	6	-3.08867	0.972454	0.00791969	0.0162497	YES		-*	-+		-*		-+			-*	-*
MIKKELSEN_MCV6_HCP_WITH_H3K27ME3	MSigDB_C2	6	-3.32489	1.53396	0.0103477	0.0151477	YES	-*	-*	-*		--		-*			--
SYSTEM_DEVELOPMENT	MSigDB_C5	6	-3.48513	0.871046	0.00207923	0.00440138	YES	-+	-+			-+	-+	-+			-*
Human Lymphoma_Tome05_1333genes (16081686-SuppTable4)	GeneSigDB	5	7.73831	4.26492	1.23551e-05	2.71142e-05	YES	+*	+*			+*		+-			+*
REACTOME_RNA_POL_I_TRANSCRIPTION	MSigDB_C2	5	6.53514	2.38563	0.000947891	0.0020718	YES		+-			+-		+-	+*		+*
MARSON_BOUND_BY_E2F4_UNSTIMULATED	MSigDB_C2	5	6.46575	3.55042	7.64117e-05	0.000135365	YES		+-			+-		+-	+-		+-
NUCLEUS	MSigDB_C5	5	6.05686	3.16137	5.76383e-05	7.67747e-05	YES	+*	+*			+*		+-			+*
REACTOME_RNA_POL_I_RNA_POL_III_AND_MITOCHONDRIAL_TRANSCRIPTION	MSigDB_C2	5	5.85012	2.164	0.000612734	0.000845108	YES		+-			+-		+-	+*		+-
KEGG_SYSTEMIC_LUPUS_ERYTHEMATOSUS	MSigDB_C2	5	5.7409	1.97327	0.000300438	0.000495402	YES		+*			+*		+*	+*		+-
SCHLOSSER_MYC_TARGETS_AND_SERUM_RESPONSE_DN	MSigDB_C2	5	5.69792	2.80505	0.00733334	0.0106737	YES	+-/+-	+*/+-			+*/+-		+*/+-				+*/+*
Mouse Lymphoma_Wu08_1016genes (18535662-TableS2b)	GeneSigDB	5	5.51663	4.96831	0.00474025	0.00644342	YES	+-	+*			+*		+-			+-
RHEIN_ALL_GLUCOCORTICOID_THERAPY_DN	MSigDB_C2	5	5.34484	3.39508	0.00121549	0.00160293	YES	++/++	*+/++			*+/+*		*+/+*				++/+*
Proliferation_DLBCL_survival	SignatureDB	5	5.22891	1.79051	0.00634472	0.00849226	YES		+*			+*	+*	+*				+*
RIBOSOME_BIOGENESIS_AND_ASSEMBLY	MSigDB_C5	5	5.08092	1.92301	0.0082428	0.0181661	YES	+*	+*			+*		+*			+*
DUTERTRE_ESTRADIOL_RESPONSE_24HR_UP	MSigDB_C2	5	5.0526	2.62319	0.00487343	0.0101801	YES		+*/*+					+-/*+	+*/*+		+-/*+	+*/++
Human Viral_Cairo08_14genes (19061838-TableS8)	GeneSigDB	5	5.01175	2.51665	0.0103035	0.0176771	YES	+*	+*			+*					+*	+*
BIOCARTA_SET_PATHWAY	MSigDB_C2	5	4.99103	0.794817	0.00419475	0.00909101	YES	+*	+*			+*		+*		+*
Human Leukemia_Yukinawa06_2000genes (16872506-SuppTable1)	GeneSigDB	5	4.98597	2.78764	0.000434577	0.000734982	YES	+*	++			++		+-			++
REACTOME_MEIOSIS	MSigDB_C2	5	4.97752	2.06713	0.003203	0.0052693	YES		+*			+*		+*	+*		+*
MODULE_21	MSigDB_C4	5	4.93428	0.640697	0.00361029	0.00747347	YES	+*	+*			+*		+*		+*
Human Viral_Cairo08_88genes (19061838-TableS16)	GeneSigDB	5	4.88961	1.88441	0.00143672	0.00243532	YES	+*	+-			+-		+-				+*
MOOTHA_HUMAN_MITODB_6_2002	MSigDB_C2	5	4.84465	1.55383	0.000556088	0.000875456	YES	+*	+*			+-		+-				+*
Human Lung_Johnson07_1334genes (17699775-SuppTable1)	GeneSigDB	5	4.83556	2.97711	0.00403025	0.00395679	YES	+*	+*			++		++				+*
TIEN_INTESTINE_PROBIOTICS_24HR_UP	MSigDB_C2	5	4.83499	3.85107	0.00853004	0.0118578	YES	+*/+*	+*/+*			++/**		+-/+*			+*/**
MODULE_552	MSigDB_C4	5	4.81959	1.24526	0.00433498	0.00682071	YES		+*					+*	+*		+*	+*
BORCZUK_MALIGNANT_MESOTHELIOMA_UP	MSigDB_C2	5	4.77534	3.01045	0.0031513	0.00516415	YES	++/**	++/**			++/**		+*/*+			++/**
CHIANG_LIVER_CANCER_SUBCLASS_UNANNOTATED_DN	MSigDB_C2	5	4.74657	2.53429	0.00348172	0.00475694	YES	**/+*	*+/+*			**/+*		*+/+-			**/+*
BUYTAERT_PHOTODYNAMIC_THERAPY_STRESS_DN	MSigDB_C2	5	4.71445	1.31743	0.000244006	0.000379835	YES	++/+*	++/++			++/++		++/+*			*+/+*
REACTOME_MEIOTIC_SYNAPSIS	MSigDB_C2	5	4.69757	1.81131	0.00763492	0.0135643	YES		+*			+*		+*			+*	+*
MOREAUX_MULTIPLE_MYELOMA_BY_TACI_DN	MSigDB_C2	5	4.69403	2.26333	0.00362274	0.00522202	YES	-*/+*	*+/+-			-*/+-		-+/+-				-*/+-
ORGANELLE_LUMEN	MSigDB_C5	5	4.69309	2.42927	0.00392735	0.00684599	YES	+*	+*			+-		+-				+*
ZHANG_BREAST_CANCER_PROGENITORS_UP	MSigDB_C2	5	4.68951	2.31906	0.00378833	0.00795568	YES	+*/+*	+*/+*			+*/+*		+-/+*				+*/+*
MEMBRANE_ENCLOSED_LUMEN	MSigDB_C5	5	4.68324	2.42339	0.00392735	0.00684599	YES	+*	+*			+-		+-				+*
GROSS_HYPOXIA_VIA_HIF1A_UP	MSigDB_C2	5	4.67322	1.13987	0.00135307	0.00185706	YES	+*/**	+*/*+			+*/*+		+-/**				+*/**
BIDUS_METASTASIS_UP	MSigDB_C2	5	4.64977	2.60444	0.00576367	0.00736777	YES	++/++	+*/++		+*/**	+*/*+		+*/*+
GRAHAM_CML_DIVIDING_VS_NORMAL_QUIESCENT_UP	MSigDB_C2	5	4.64237	2.30108	0.00359952	0.00629538	YES		+*/++					+*/*+	+*/+*		+*/*+	+*/++
ACOSTA_PROLIFERATION_INDEPENDENT_MYC_TARGETS_UP	MSigDB_C2	5	4.63109	1.06327	0.00083116	0.00172666	YES	+*/**	+*/**			+*/*+		+*/**			+*/*+
MODULE_98	MSigDB_C4	5	4.60455	2.81532	0.00182324	0.0025307	YES		++			+*		+*	+*		+*
chr6p22	MSigDB_C1	5	4.59623	1.24294	0.00189319	0.00377039	YES		+-			+-		+-	+*		+*
Blood_Module-2.9_Undetermined	SignatureDB	5	4.57621	0.818776	0.000326641	0.000412012	YES	+*	+*			+*		+-		+*
REACTOME_CLASS_I_MHC_MEDIATED_ANTIGEN_PROCESSING_PRESENTATION	MSigDB_C2	5	4.56535	1.2674	0.000389151	0.000518241	YES	+*	+*			+*		+*			+-
Human Lung_Tahir10_6genes (20179162-Table2c)	GeneSigDB	5	4.56193	1.12474	0.00527532	0.00342675	YES	+*	+*	+*		+*		+*
DANG_MYC_TARGETS_UP	MSigDB_C2	5	4.5585	2.82405	0.00691978	0.011	YES	+*/**	+-/**			+-/**		+-/**				+*/**
chr3q27	MSigDB_C1	5	4.5509	1.41545	0.00372888	0.00694245	YES	+*	+*			+*	+*				+*
MODULE_102	MSigDB_C4	5	4.53108	0.815429	0.00278674	0.00556117	YES	+*	+*			+*		+*			+*
SCHLOSSER_MYC_AND_SERUM_RESPONSE_SYNERGY	MSigDB_C2	5	4.46987	2.15488	0.00847042	0.015484	YES	+*	+*			+*		+*			+*
Blood_Module-1.4_Undetermined	SignatureDB	5	4.44834	1.79348	0.00436448	0.00590485	YES		++	+*				+*		+*		++
GNF2_MCM5	MSigDB_C4	5	4.42671	2.87313	0.0121246	0.017137	YES	+*	+*			+-		+-				+*
Human Breast_Miller05_p53 (16141321-Table2)	GeneSigDB	5	4.39848	3.8105	0.0164608	0.01595	YES		+*			+*		+*	+*	+*
REACTOME_DEADENYLATION_DEPENDENT_MRNA_DECAY	MSigDB_C2	5	4.39689	1.4806	0.00789439	0.0170135	YES	+*	+*			+*		+*			+*
MODULE_8	MSigDB_C4	5	4.373	1.82554	0.00732369	0.0157758	YES	+*	+*			+*		+*				++
Human HeadandNeck_Slebos06_17genes (16467079-Table3b)	GeneSigDB	5	4.35576	0.691863	0.00643766	0.0108071	YES	+*			+*		+*	+*			+*
Human LungNotCaner_Kent08_23genes (18358739-Table1a)	GeneSigDB	5	4.34732	1.13541	0.0069258	0.00774957	YES	+*	+*					+*	+*			+*
PUJANA_BRCA2_PCC_NETWORK	MSigDB_C2	5	4.34063	2.57396	0.00837347	0.0170794	YES		+*			+*		+-	+*		+-
MORF_RFC4	MSigDB_C4	5	4.32702	3.33032	0.012082	0.0154161	YES	+-	+*			+-		+-				+*
MODULE_56	MSigDB_C4	5	4.32057	0.521048	0.00551754	0.0104901	YES	+*	+*			+*		+*		+*
NUCLEOTIDYLTRANSFERASE_ACTIVITY	MSigDB_C5	5	4.30923	0.764702	0.000752675	0.000904431	YES	+*	+*			+*		+*			+*
KIM_WT1_TARGETS_12HR_DN	MSigDB_C2	5	4.28941	1.86978	0.00361727	0.00578956	YES	*+/+*	*+/++		**/+*	-+/++		*+/++
Human Viral_Krishnan04_59genes (15308739-Table1)	GeneSigDB	5	4.28742	2.70162	0.00725836	0.00701134	YES		+*			+*		+-			+*	+*
MODULE_198	MSigDB_C4	5	4.27824	2.76241	0.00402066	0.00381571	YES		+*			+*		+*	+*		+*
MODULE_261	MSigDB_C4	5	4.27345	0.926509	0.00108241	0.00136125	YES	++		+*		+*	+*	+*
Human Leukemia_Toren05_224genes (16140871-SuppTable7)	GeneSigDB	5	4.26037	0.955571	0.00220417	0.00430551	YES	+*	+*					++		+*		+*
Human Bladder_Aaboe05_86genes (16265353-SuppTable2)	GeneSigDB	5	4.24032	2.25728	0.00713998	0.00899781	YES	+*	+*					+-			+*	+*
MODULE_219	MSigDB_C4	5	4.22729	1.23008	0.00931965	0.0197983	YES	+*	+*			+-		+*			+*
MODULE_358	MSigDB_C4	5	4.22675	1.17357	0.00273579	0.00463667	YES	++		+*		+*	+*	+*
RRNA_PROCESSING	MSigDB_C5	5	4.22441	1.70032	0.00830893	0.0113851	YES	+*	+*			+*		+*			+*
RCGCANGCGY_V$NRF1_Q6	MSigDB_C3	5	4.21744	2.35396	0.010292	0.0214374	YES	+*	+*			+*		+-			+-
GOLDRATH_ANTIGEN_RESPONSE	MSigDB_C2	5	4.17573	1.23962	0.00144065	0.0013971	YES		+*	+*				+*		+*		++
MORF_PPP1CC	MSigDB_C4	5	4.17172	2.49072	0.0121923	0.0196501	YES		+*			+*		+-			+-	+*
Human Leukemia_Krivtsov08_50genes (18977325-Figure5e)	GeneSigDB	5	4.16655	0.949566	0.00407029	0.00779275	YES	+*	+*			+*		+*				+*
AGUIRRE_PANCREATIC_CANCER_COPY_NUMBER_UP	MSigDB_C2	5	4.14107	1.567	0.00687633	0.0134858	YES	+*/+*				+-/*+	+-/+*	+-/+*			+*/**
MODULE_222	MSigDB_C4	5	4.1394	1.10655	0.00972009	0.0157325	YES		+*					+*	+*		+*	+*
REACTOME_MRNA_DECAY_BY_3_TO_5_EXORIBONUCLEASE	MSigDB_C2	5	4.12019	1.42613	0.0118091	0.0172059	YES	+*	+*			+*		+*	+*
MIPS_EXOSOME	MSigDB_C2	5	4.10108	1.02096	0.0111039	0.0176674	YES	+*	+*			+*		+*	+*
REACTOME_ACTIVATION_OF_CHAPERONE_GENES_BY_XBP1S	MSigDB_C2	5	4.08886	1.52982	0.00376165	0.00433695	YES	+-	+*			+*		+*			+*
PELLICCIOTTA_HDAC_IN_ANTIGEN_PRESENTATION_DN	MSigDB_C2	5	4.08517	1.83663	0.00944404	0.0150825	YES	+*/+*	**/+-			**/+*		+*/+*			**/+*
ZHENG_FOXP3_TARGETS_UP	MSigDB_C2	5	4.06892	1.35684	0.0096237	0.00935035	YES		+*/*+	+*/+*	+*/**				+*/**	+*/**
NUCLEAR_LUMEN	MSigDB_C5	5	4.05695	2.02167	0.00899421	0.0153712	YES	+*	+*			+-		+-				+*
chr3p23	MSigDB_C1	5	4.04976	0.539331	0.00969019	0.0113677	YES	+*	+*	+*	+*			+*
RODRIGUES_THYROID_CARCINOMA_POORLY_DIFFERENTIATED_DN	MSigDB_C2	5	4.04339	1.19715	0.00264056	0.00456368	YES	+*/++			+*/++		**/++	+-/++				+*/++
MORF_EI24	MSigDB_C4	5	4.03442	2.19441	0.0044424	0.00580656	YES	+*	+-			+*		+-			+-
Human Leukemia_Li07_19genes (17313671-SuppTable1d)	GeneSigDB	5	4.0312	1.23609	0.0132486	0.0202508	YES	+*	+*			+*					+*	+*
POOLA_INVASIVE_BREAST_CANCER_UP	MSigDB_C2	5	4.02973	1.70644	0.00428375	0.00671096	YES		++/**	++/**				++/*+	+*/**			++/**
Human Leukemia_Fung05_23genes (15735688-Table1)	GeneSigDB	5	4.01714	1.07487	0.0119757	0.0171503	YES		+*			+*	+*	+*	+*
OUYANG_PROSTATE_CANCER_PROGRESSION_UP	MSigDB_C2	5	4.00778	1.09541	0.00762952	0.00922384	YES		+*/**	+*/**	+*/**	+*/+*		+*/+*
MODULE_168	MSigDB_C4	5	4.00569	0.961837	0.0097431	0.0157148	YES		+*					+*	+*		+*	+*
RRNA_METABOLIC_PROCESS	MSigDB_C5	5	4.00442	1.65616	0.0107423	0.0138235	YES	+*	+*			+*		+*			+*
chr15q24	MSigDB_C1	5	3.99862	1.37255	0.0102996	0.018116	YES	+*	+*	+*			+*				+*
BENPORATH_CYCLING_GENES	MSigDB_C2	5	3.99756	3.39631	0.0138022	0.0161848	YES		+*			+*		+*	+-		+*
GGGCGGR_V$SP1_Q6	MSigDB_C3	5	3.99604	1.63066	0.00212202	0.00241759	YES	++	++			++		+*			+*
REACTOME_CELL_CYCLE	MSigDB_C2	5	3.99419	4.26806	0.00265349	0.00526599	NO		+*	-*		+*		+-			+*
BAKER_HEMATOPOESIS_STAT5_TARGETS	MSigDB_C2	5	3.99382	1.30246	0.0163921	0.00828348	YES					+*	+*	+*			++	+*
FUNG_IL2_SIGNALING_1	MSigDB_C2	5	3.98689	0.617839	0.00996722	0.0146048	YES		+*			+*		+*	+*		+*
RUIZ_TNC_TARGETS_DN	MSigDB_C2	5	3.98497	1.86362	0.00800879	0.00860597	YES		*+/+*			*+/+*		*+/+*			*+/+*	**/+*
Human Breast_Cicatiello04_78genes_ER (15171711-Table5)	GeneSigDB	5	3.95739	1.41704	0.00839476	0.0158601	YES	+*	+*			+*		+*			+*
Human Lymphoma_Cassinelli09_32genes (19555670-Table1b)	GeneSigDB	5	3.95564	1.03957	0.00834595	0.00948505	YES					+*	+*	+*		+*		+*
BAKER_HEMATOPOIESIS_STAT3_TARGETS	MSigDB_C2	5	3.92963	1.9009	0.0245115	0.016889	YES			+*			++			+*	++	+*
RHODES_UNDIFFERENTIATED_CANCER	MSigDB_C2	5	3.92237	1.92179	0.0160234	0.0199475	YES		+*					+-	+*	+*	+*
EXONUCLEASE_ACTIVITY	MSigDB_C5	5	3.92185	0.872588	0.00577929	0.0072459	YES	+*	+*			+*		+*	+*
Mouse Lung_not_cancer_Kahnert06_163genes (16479545-SuppTable1)	GeneSigDB	5	3.91379	1.15839	0.00352851	0.00342892	YES		++	+*	+*			++				+*
MULLIGHAN_MLL_SIGNATURE_1_UP	MSigDB_C2	5	3.89546	1.80942	0.0100572	0.0177657	YES	+*/++	++/*+					+*/*+		+*/**	++/*+
Human Lung_not_cancer_Golpon04_150genes (15284076-Figure1)	GeneSigDB	5	3.89155	1.52161	0.00916167	0.0132294	YES		+*			+*		+-			+*	+*
Human Viral_Sun01_27genes_Apoptosis-Related (11573962-Table2)	GeneSigDB	5	3.88477	0.974395	0.00574155	0.00899241	YES	+*	+*			+*		+*		+*
MODULE_127	MSigDB_C4	5	3.88094	0.473108	0.00514861	0.00430476	YES		+*					+*	+*		+*	+*
GNF2_HCK	MSigDB_C4	5	3.87717	1.09564	0.00443113	0.00526022	YES	+*	+*					+*		+*		+*
chr3q23	MSigDB_C1	5	3.87492	1.6424	0.0127423	0.018329	YES		+*		+*	+*	+*	+*
MODULE_244	MSigDB_C4	5	3.86868	1.73084	0.00318732	0.00359695	YES	+*	+*			+*		+*			+*
TSUDA_ALVEOLAR_SOFT_PART_SARCOMA	MSigDB_C2	5	3.86625	1.43678	0.0168586	0.0149104	YES	+*	+*	+*		+*				+*
Human Leukemia_Li07_18genes (17313671-SuppTable1c)	GeneSigDB	5	3.85205	0.67879	0.00655233	0.0102731	YES	+*				+*	+*	+*			+*
BROWN_MYELOID_CELL_DEVELOPMENT_DN	MSigDB_C2	5	3.84136	1.1568	0.0080349	0.0171687	YES	+*/+*	+*/+*			*+/+*		++/+*			*+/+*
Mouse Viral_Craft08_969genes (18787207-TableS2)	GeneSigDB	5	3.83255	2.43639	0.0087036	0.0139675	YES	+*	++		+*	+*		+*
chr3q	MSigDB_C1	5	3.8261	0.954941	0.0168323	0.0126319	YES					+*	+*	+*		+*	+*
MORF_HAT1	MSigDB_C4	5	3.81817	2.90496	0.0158927	0.0167515	YES	+*	+*			+*		+-			+-
ZHAN_MULTIPLE_MYELOMA_MF_DN	MSigDB_C2	5	3.78738	1.05054	0.00858631	0.00893973	YES		**/++	**/++			*+/+*			**/++		**/++
GRABARCZYK_BCL11B_TARGETS_UP	MSigDB_C2	5	3.77839	1.11827	0.00530109	0.00589637	YES	+*/**	+*/**	+*/**				+*/**				+*/**
HOXA9_DN.V1_UP	MSigDB_C6	5	3.75091	1.45457	0.0109392	0.0149437	YES	+*/+*	+*/++					+*/+*	+*/**			+*/+*
Human Breast_Martin09_485genes (19225562-TableS1)	GeneSigDB	5	3.74802	1.89311	0.00859772	0.0122903	YES	+*	+*		+*	+*		+*
REACTOME_TRAFFICKING_AND_PROCESSING_OF_ENDOSOMAL_TLR	MSigDB_C2	5	3.73259	0.813977	0.0166363	0.0121859	YES	+*	+*	+*			+*			+*
STEIN_ESRRA_TARGETS_UP	MSigDB_C2	5	3.73146	1.30401	0.00900086	0.0161312	YES	++/++	+*/+*		+*/**	+*/++		+*/+*
REGULATION_OF_JNK_ACTIVITY	MSigDB_C5	5	3.72862	2.04581	0.0215709	0.019531	YES	+*	+*		+*		+*	+*
MODULE_53	MSigDB_C4	5	3.7176	1.8762	0.0121669	0.0160665	YES		+*			+*		+*			++	+*
NIKOLSKY_BREAST_CANCER_17P11_AMPLICON	MSigDB_C2	5	3.71629	0.996515	0.0150865	0.0115676	YES					+*		+*	+*	+*	+*
INTERLEUKIN_BINDING	MSigDB_C5	5	3.70932	1.44532	0.0144328	0.0146382	YES		+*	+*				+*	+*	+*
MODULE_421	MSigDB_C4	5	3.7074	0.685129	0.00648524	0.00553681	YES					+*		+*	+*		+*	+*
Human Leukemia_Wlodarski08_11genes (18086899-Table4)	GeneSigDB	5	3.69527	1.04942	0.0216749	0.0118899	YES	+*	+*				+*			+*		+*
REACTOME_PYRIMIDINE_METABOLISM	MSigDB_C2	5	3.68862	0.91863	0.0106004	0.00563359	YES			+*		+*				+*	+*	+*
DEMAGALHAES_AGING_UP	MSigDB_C2	5	3.68758	1.49313	0.0122566	0.0157072	YES	+*/**	+*/**	+*/*+		+*/**		++/**
BIOSYNTHETIC_PROCESS	MSigDB_C5	5	3.6856	1.2163	0.00918717	0.01894	YES	+*	+*			+*		+*			+*
Human Leukemia_Yeoh02_105genes (12086872-Table12g)	GeneSigDB	5	3.68492	0.981476	0.00328036	0.0040697	YES	++	++	+*		++		+*
KALMA_E2F1_TARGETS	MSigDB_C2	5	3.66267	0.792967	0.0121866	0.00731032	YES	+*				+*		+*			+*	+*
Human Breast_Creighton08_772genes (18794137-SuppTable1a)	GeneSigDB	5	3.6516	1.85872	0.00595363	0.00577273	YES		++		++		++	++				++
PYRIMIDINE_NUCLEOTIDE_METABOLIC_PROCESS	MSigDB_C5	5	3.64631	1.58155	0.0250189	0.0196984	YES		+*	+*		+*				+*	+*
Tcell_PIind4x_CsAindependent	SignatureDB	5	3.64493	0.885892	0.0117446	0.0078994	YES		+*	+*	+*			+*				+*
Human StemCell_Ehrchen07_23genes (17018861-Table1)	GeneSigDB	5	3.64378	1.11185	0.0132754	0.016889	YES	+*	+*			+*		+*	+*
REACTOME_ANTIGEN_PROCESSING_UBIQUITINATION_PROTEASOME_DEGRADATION	MSigDB_C2	5	3.63549	1.3101	0.00473124	0.00696764	YES	+*	+*			+*		+*			+-
Human Leukemia_Wilson06_50genes_DifferentialClusterD (16597596-TableS2-4)	GeneSigDB	5	3.60974	0.898739	0.00723342	0.00896267	YES	+*	+*			+*		+-				+*
BIOCARTA_D4GDI_PATHWAY	MSigDB_C2	5	3.60691	0.905347	0.0170092	0.013599	YES		+*		+*	+*		+*		+*
Human Breast_Hedenfalk01_51genes_BRCA (11207349-Supp1)	GeneSigDB	5	3.60612	1.03461	0.0081968	0.0106853	YES	+*	+*			+*		+*				+*
Human Colon_Grade06_621genes (16397240-SuppTable9)	GeneSigDB	5	3.59015	1.34428	0.00876647	0.0179669	YES	++	++		+*	+*		+*
SHEPARD_CRUSH_AND_BURN_MUTANT_UP	MSigDB_C2	5	3.5869	1.17801	0.00569059	0.00713832	YES	++/*-	+*/*-			+*/*-		+*/**				+*/**
Human Leukemia_Teuffel04_132genes (15257931-SuppTableD)	GeneSigDB	5	3.58594	1.14543	0.00857804	0.012355	YES	++	+*					++			++	++
OUELLET_OVARIAN_CANCER_INVASIVE_VS_LMP_UP	MSigDB_C2	5	3.58175	1.99398	0.0150505	0.0162767	YES		+*/**		+*/**	+*/*+		+*/**				++/**
chr10p14	MSigDB_C1	5	3.57986	0.563687	0.0076365	0.00993971	YES	+*	+*			+*	+*	+*
DNA_HELICASE_ACTIVITY	MSigDB_C5	5	3.57433	1.22418	0.0118688	0.0104885	YES	+*	+*			+*		+*				+*
REACTOME_METABOLISM_OF_NUCLEOTIDES	MSigDB_C2	5	3.56768	1.15019	0.0111835	0.0213671	YES	+*	+*			+*		+*			+*
HELICASE_ACTIVITY	MSigDB_C5	5	3.55677	1.28027	0.0090563	0.0101281	YES	+*	+*		+*	+*		+*
Human Leukemia_Dijkman07_63genes (17068154-Table3)	GeneSigDB	5	3.55624	0.733754	0.010278	0.014518	YES		+-				+*	+*		+*		+*
CREIGHTON_ENDOCRINE_THERAPY_RESISTANCE_1	MSigDB_C2	5	3.5462	2.03509	0.00889833	0.00786967	YES		++		++		++	++				++
NUCLEAR_PART	MSigDB_C5	5	3.5454	4.02168	0.0143401	0.0199069	NO	+*	+*	--		+-		+-
V$NFMUE1_Q6	MSigDB_C3	5	3.53634	1.0236	0.00427595	0.00505052	YES	+*	+*			+*		+-			+*
Mouse Liver_White05_638genes (15546871-Table1S)	GeneSigDB	5	3.52873	1.63162	0.00632715	0.00737743	YES	+*	+*					+*		+*		+*
GARGALOVIC_RESPONSE_TO_OXIDIZED_PHOSPHOLIPIDS_BLACK_DN	MSigDB_C2	5	3.52487	0.77016	0.0154403	0.0159741	YES	**/+*	**/+*		**/+*	**/+*		**/+*
Human StemCell_Pramoonjago06_50genes_DownRegulated (16636670-Table2)	GeneSigDB	5	3.52027	0.978249	0.00913886	0.0130114	YES	+*	+*			+*		+*			+*
PROTEIN_METABOLIC_PROCESS	MSigDB_C5	5	3.51913	1.39077	0.00824771	0.0137348	YES	+*	+*			++	++	+*
Human Colon_Fritzmann09_123genes (19328798-SuppTable2)	GeneSigDB	5	3.51331	1.11229	0.00532335	0.00625433	YES	+*	+*			+*		+*			+*
MODULE_278	MSigDB_C4	5	3.50575	0.523546	0.004116	0.00321264	YES	+*	+*			+*		+*			+*
ZAMORA_NOS2_TARGETS_UP	MSigDB_C2	5	3.50402	1.23408	0.011405	0.0168198	YES	+*/**	+*/**			+*/**		+*/**				+*/**
Human Liver_Farci10_50genes (20421498-TableS4)	GeneSigDB	5	3.49682	0.73081	0.009472	0.0110699	YES	+*	+*	+*		+*		+*
GOLDRATH_HOMEOSTATIC_PROLIFERATION	MSigDB_C2	5	3.49671	1.36362	0.0113015	0.0202	YES		+*		+*	+*		+*				+*
SENGUPTA_NASOPHARYNGEAL_CARCINOMA_UP	MSigDB_C2	5	3.48056	2.25973	0.0127659	0.0138524	YES	++/**	++/**			++/-*		++/-+	+*/**
Mouse Lung_not_cancer_Kahnert06_70genes (16479545-Table2)	GeneSigDB	5	3.47965	0.560133	0.00690257	0.00632789	YES		+*		+*			+*	+*			+*
GNF2_PECAM1	MSigDB_C4	5	3.47806	1.10386	0.0105297	0.0119379	YES	+-	+*	+*	+*			+*
LEE_DIFFERENTIATING_T_LYMPHOCYTE	MSigDB_C2	5	3.46635	1.60468	0.0143792	0.0175127	YES	++		+*		++	+*	+*
Mouse Leukemia_Walter04_62genes_a (15572690-SuppTable5a)	GeneSigDB	5	3.46274	1.9873	0.0205326	0.0194962	YES	+*				+*	+*	+-	+*
Myeloma_HY_subgroup_UP	SignatureDB	5	3.44684	0.819533	0.0114633	0.0174695	YES		+*/*+	+*/*+			+*/**	+*/*+			+*/**
GNF2_MYD88	MSigDB_C4	5	3.44653	1.13425	0.0156362	0.0185317	YES	+-					+*	+-		+*		+*
LAU_APOPTOSIS_CDKN2A_UP	MSigDB_C2	5	3.42521	0.873341	0.00942058	0.0102036	YES					+*/**	+*/**	+-/**			+*/**	+*/**
REACTOME_REGULATION_OF_SIGNALING_BY_CBL	MSigDB_C2	5	3.4229	0.808536	0.0166718	0.015888	YES	+*		+*				+*			+*	+*
MODULE_177	MSigDB_C4	5	3.41705	1.72881	0.0116092	0.00960494	YES	++	++			+*		+*				++
REACTOME_IL_RECEPTOR_SHC_SIGNALING	MSigDB_C2	5	3.41385	0.775789	0.0122154	0.00991175	YES		+*	+*	+*			+*	+*
Human Colon_Iizaka02_83genes (11906190-Table1a-2)	GeneSigDB	5	3.4095	1.09575	0.0121487	0.0186439	YES	+*	+*			+*		+*		+*
Human Leukemia_McWeeney10_885genes (19837975-TableS1)	GeneSigDB	5	3.40853	0.627386	0.00348879	0.00625426	YES		++		+*		++	++				++
Hematopoietic_Node1658	SignatureDB	5	3.40429	1.32279	0.0138515	0.0192851	YES	+*	+*				+*	+*				+*
MORF_FBL	MSigDB_C4	5	3.40393	4.38729	0.0196654	0.0215747	NO	+*		-*		+*		+-			+-
Human Lymphoma_Islam02_10genes (11920564-Table2)	GeneSigDB	5	3.40196	0.6931	0.0191756	0.0111701	YES		+*			+*	+*	+*		+*
Human Lymphoma_Piccaluga07_28genes (17304354-Table9s)	GeneSigDB	5	3.39718	1.31939	0.0192068	0.0199317	YES	+*	+*		+*	+*		+*
Human Breast_Wang04_36genes (15548681-Table3)	GeneSigDB	5	3.39474	0.940897	0.0152373	0.010693	YES	+*		+*				+*			+*	+*
NUCLEAR_ENVELOPE_ENDOPLASMIC_RETICULUM_NETWORK	MSigDB_C5	5	3.39224	0.623046	0.00486104	0.00429856	YES	+*	+*				+*	+*				+*
LI_INDUCED_T_TO_NATURAL_KILLER_UP	MSigDB_C2	5	3.38472	1.38407	0.010892	0.0158159	YES		++/*+	+*/*+				++/*+		+*/*+		++/*+
GNF2_CD1D	MSigDB_C4	5	3.3799	0.665044	0.00929444	0.00698751	YES	+*	+*					+*		+*		+*
JIANG_HYPOXIA_VIA_VHL	MSigDB_C2	5	3.36929	0.6704	0.0109168	0.011242	YES	+*				+*		+*			+*	+*
RESPONSE_TO_DNA_DAMAGE_STIMULUS	MSigDB_C5	5	3.36733	0.918498	0.00501851	0.00580778	YES	+*	+*			+*		+-			+*
MORF_RAC1	MSigDB_C4	5	3.36325	1.5762	0.0155278	0.0204231	YES	+*	+*			++		+-			+*
chr3q28	MSigDB_C1	5	3.36246	0.905494	0.0167337	0.0148895	YES	+*	+*		+*	+*					+*
ENDOMEMBRANE_SYSTEM	MSigDB_C5	5	3.36005	0.903193	0.00386189	0.00350037	YES	+*	+*			++	+*	+*
PYEON_CANCER_HEAD_AND_NECK_VS_CERVICAL_UP	MSigDB_C2	5	3.3561	1.4738	0.0132213	0.0191697	YES	+*/**	+*/**		+*/**	+*/-*		+*/*+
NUNODA_RESPONSE_TO_DASATINIB_IMATINIB_UP	MSigDB_C2	5	3.351	0.907041	0.0158642	0.0145519	YES		+*/**	+*/**		+*/**	+*/**	+*/**
HEDENFALK_BREAST_CANCER_BRCA1_VS_BRCA2	MSigDB_C2	5	3.35012	1.59754	0.0107095	0.00716377	YES		+*			+*		+*		+*		+*
GAVIN_FOXP3_TARGETS_CLUSTER_P3	MSigDB_C2	5	3.34262	0.581346	0.00495489	0.00381622	YES			+*				++	+*	+*		++
Human StemCell_Langer08_19genes (18378853-Table3b)	GeneSigDB	5	3.33491	0.634999	0.0273584	0.0237864	YES		+*		+*			+*		+*		+*
MODULE_126	MSigDB_C4	5	3.31876	1.78316	0.0173831	0.0211196	YES	+*	+*			+*		+*		+*
OSWALD_HEMATOPOIETIC_STEM_CELL_IN_COLLAGEN_GEL_DN	MSigDB_C2	5	3.31536	1.29374	0.0109992	0.014002	YES	+*/+*			+-/+*		+*/++	++/+*		+*/+*
WHITFIELD_CELL_CYCLE_S	MSigDB_C2	5	3.31384	1.61008	0.0151261	0.0150728	YES				+*	+*		+*	+*			+*
Human Breast_Lee10_23genes (20068086-ST1-3)	GeneSigDB	5	3.31224	0.768488	0.0120376	0.0139906	YES	+*	+*			+*		+*			+*
MODULE_123	MSigDB_C4	5	3.31193	0.550416	0.00441991	0.00434481	YES		++	+*				++		+*		+*
WONG_PROTEASOME_GENE_MODULE	MSigDB_C2	5	3.30975	1.52995	0.0174057	0.0157067	YES	+*	+*			+*		+*			+*
Human Breast_Horlings10_271genes (20068109-SuppTable3)	GeneSigDB	5	3.30676	1.02879	0.00675666	0.0103087	YES	+*	++			+*		++			+*
Mouse StemCell_Ulloa-Montoya07_800genes (17683608-TableS3)	GeneSigDB	5	3.30072	1.00756	0.00790954	0.0137577	YES	++	++	++				++				+*
SANDERSON_PPARA_TARGETS	MSigDB_C2	5	3.29689	0.188755	0.0222913	0.0154626	YES		+*	+*	+*			+*				+*
RNA_POLYMERASE_ACTIVITY	MSigDB_C5	5	3.27109	1.1778	0.0217586	0.0244094	YES	+*	+*			+*		+*			+*
LEE_EARLY_T_LYMPHOCYTE_DN	MSigDB_C2	5	3.26652	1.07254	0.0160612	0.0149664	YES			**/+*	**/+*		**/+*	+*/+*				**/++
Human Breast_Einav05_34genes (16007187-GeneList)	GeneSigDB	5	3.26472	0.655401	0.0181882	0.0144346	YES				+*		+*	+*		+*		+*
INTRACELLULAR_TRANSPORT	MSigDB_C5	5	3.26471	1.06771	0.0134027	0.0188772	YES	+*	+*			+*		+*		+*
LIU_NASOPHARYNGEAL_CARCINOMA	MSigDB_C2	5	3.24429	0.785066	0.00890477	0.0130455	YES	+*	+*			+*		+*				+*
GNF2_CD33	MSigDB_C4	5	3.24244	0.986201	0.0174237	0.0175066	YES	+*	+*		+*			+*		+*
JUBAN_TARGETS_OF_SPI1_AND_FLI1_DN	MSigDB_C2	5	3.23904	1.93301	0.0243772	0.0198211	YES		++/++	+*/+*	**/+*	**/+*		+*/+*
RESPONSE_TO_ENDOGENOUS_STIMULUS	MSigDB_C5	5	3.23631	0.693525	0.00503715	0.00631196	YES	+*	+*			+*		+-			+*
KEGG_GLYCOSPHINGOLIPID_BIOSYNTHESIS_GANGLIO_SERIES	MSigDB_C2	5	3.23346	1.07382	0.0228859	0.0139545	YES	+*				+*	+*				+*	+*
TOMLINS_PROSTATE_CANCER_UP	MSigDB_C2	5	3.22264	0.485158	0.00939632	0.00924891	YES	+*/**	+*/**		+*/**			+*/*+			+*/*+
Human Breast_Cecco09_24genes (19930681-Table2-2)	GeneSigDB	5	3.22157	1.27365	0.0215548	0.018977	YES					+*	+*	+*	+*		+*
MORF_G22P1	MSigDB_C4	5	3.21886	4.0191	0.0107923	0.0140477	NO	+*				+*		+-	--		+*
MODULE_436	MSigDB_C4	5	3.21655	1.11681	0.0166967	0.0199192	YES			+*			+*	+*	+*			+*
Human Breast_Thuerigen06_512genes_TGFb (16622258-SuppTable2)	GeneSigDB	5	3.20699	0.698204	0.00508699	0.00712438	YES	+*	+*			++	++	+*
REACTOME_AMINO_ACID_SYNTHESIS_AND_INTERCONVERSION_TRANSAMINATION	MSigDB_C2	5	3.20433	0.719143	0.0201944	0.0211507	YES	+*	+*			+*		+*				+*
AAGCAAT,MIR-137	MSigDB_C3	5	3.19648	0.920895	0.00750176	0.0103249	YES	++	++		+*		+*	++
Human Liver_Chao09_1031genes (18787218-tableS1)	GeneSigDB	5	3.19504	1.43642	0.0152288	0.0179629	YES	++	++	++	+*							++
BROWNE_HCMV_INFECTION_14HR_UP	MSigDB_C2	5	3.18573	0.703243	0.0070309	0.0108686	YES	+*/**	+*/*+			+*/*+		+*/*+			+*/*+
MODULE_534	MSigDB_C4	5	3.18309	0.624061	0.0218125	0.0196512	YES					+*		+*	+*		+*	+*
JOHNSTONE_PARVB_TARGETS_3_UP	MSigDB_C2	5	3.17905	0.864908	0.0101025	0.0167002	YES	+*/++		+*/+*	+*/+*			++/+*				+*/+*
GKCGCNNNNNNNTGAYG_UNKNOWN	MSigDB_C3	5	3.17853	0.929648	0.0115897	0.0132648	YES	+*	+*			+*		+*			+*
MORF_DDB1	MSigDB_C4	5	3.17139	2.97181	0.00587119	0.0120549	NO	+*		-*		+*		+-			+-
Human Lung_Kikuchi03_50genes (12687021-Figure1)	GeneSigDB	5	3.16428	0.507369	0.00765562	0.00688503	YES	+*	+*			+*		+*			+*
Human Viral_Urosevic07_347genes (17823660-TableS1a)	GeneSigDB	5	3.16107	1.46164	0.0159709	0.0194431	YES	++			+*			++		++		++
Human StemCell_Meijden02_222genes (12036939-Table3)	GeneSigDB	5	3.1602	1.17103	0.0164056	0.0203292	YES			++				+*	+*		++	+*
Mouse Breast_Stein09_1780genes (19408105-SuppTable4)	GeneSigDB	5	3.16	0.665193	0.00626756	0.0101432	YES	+*	++					++			++	++
REGULATION_OF_PROGRAMMED_CELL_DEATH	MSigDB_C5	5	3.15987	0.61295	0.00644771	0.00775367	YES	+*		+-				+*	+*			+*
VANTVEER_BREAST_CANCER_METASTASIS_DN	MSigDB_C2	5	3.15787	0.991223	0.0126876	0.0125018	YES	**/+*	**/+*		**/+*			**/+*				**/+*
LINDGREN_BLADDER_CANCER_CLUSTER_1_DN	MSigDB_C2	5	3.15732	1.0799	0.00855423	0.0075495	YES	*+/+*	**/++					**/++		**/+*	**/++
UEDA_PERIFERAL_CLOCK	MSigDB_C2	5	3.15583	0.592987	0.00611803	0.00624215	YES	+*	+*					+*		+*		+*
Human Viral_Prueitt08_34genes (18459106-Table3)	GeneSigDB	5	3.15299	0.585398	0.0131641	0.0142075	YES	+*	+*	+*		+*		+*
MILI_PSEUDOPODIA_HAPTOTAXIS_UP	MSigDB_C2	5	3.14381	3.85148	0.0121831	0.0200285	NO		+*/++		+*/**	+*/++		+*/++			-*/+*
REACTOME_SYNTHESIS_OF_SUBSTRATES_IN_N_GLYCAN_BIOSYTHESIS	MSigDB_C2	5	3.13868	0.659304	0.0251833	0.0126729	YES	+*		+*		+*				+*	+*
Mouse Lymphoma_Wu08_1777genes (18535662-TableS2a)	GeneSigDB	5	3.13162	0.846468	0.00835386	0.0121514	YES	++	++		+*			++				++
Human StemCell_Chow06_57genes (16116475-Table1)	GeneSigDB	5	3.13062	0.271247	0.00503104	0.00249564	YES	+*	+*			+*		+*			+*
KEGG_LIMONENE_AND_PINENE_DEGRADATION	MSigDB_C2	5	3.12729	0.709117	0.0281967	0.0161815	YES	+*	+*					+*	+*			+*
REACTOME_DNA_REPAIR	MSigDB_C2	5	3.12704	0.961744	0.0109364	0.0144882	YES	+*	+*			+-		+-			+*
Mouse Leukemia_Torchia07_25genes (17875932-TableS3)	GeneSigDB	5	3.1265	0.295315	0.0256013	0.00489521	YES	+*			+*		+*			+*	+*
LIAN_LIPA_TARGETS_3M	MSigDB_C2	5	3.12021	1.01033	0.0194764	0.0183766	YES	+*	+*	+*				+*				+*
DORSEY_GAB2_TARGETS	MSigDB_C2	5	3.11167	0.626717	0.0190991	0.00973843	YES			++			++	++		++		+*
WANG_TARGETS_OF_MLL_CBP_FUSION_DN	MSigDB_C2	5	3.10872	0.54844	0.0101282	0.00797896	YES	**/+*	**/+*			**/+*		+*/+*				**/+*
Human Breast_Ayers04_74genes_Response (15136595-Table2)	GeneSigDB	5	3.10401	0.726753	0.0158389	0.0105476	YES	+*	++					+*		+*		+*
ZHAN_MULTIPLE_MYELOMA_CD1_DN	MSigDB_C2	5	3.09978	1.23961	0.0243316	0.0218463	YES					*+/+*	**/+*	**/+*			**/+*	**/+*
TIEN_INTESTINE_PROBIOTICS_24HR_DN	MSigDB_C2	5	3.09925	0.447761	0.00537105	0.00373859	YES	+*/+*	+*/+*		*-/+*			+-/+*				**/+*
Mouse Skin_Darwiche07_67genes (17525749-Table1)	GeneSigDB	5	3.08525	0.592169	0.0217465	0.0104618	YES	+*		+*	+*					+*		+*
Human Leukemia_Wilson06_50genes_SigDifferentialClusterB2 (16597596-TableS2-2)	GeneSigDB	5	3.08254	0.679465	0.0126256	0.0121888	YES	+*	+*				+*	+*			+*
RESPONSE_TO_STRESS	MSigDB_C5	5	3.07827	1.00657	0.0145133	0.0198127	YES	+*	+*					+*	+*		+*
MODULE_182	MSigDB_C4	5	3.07464	0.450929	0.00699972	0.0056429	YES	+*		+*		+*	+*	+*
DNA_BINDING	MSigDB_C5	5	3.07195	1.40724	0.0127939	0.0166027	YES	+*	+*				+*	+*			+*
TRANSFERASE_ACTIVITY_TRANSFERRING_HEXOSYL_GROUPS	MSigDB_C5	5	3.06327	0.778689	0.0137223	0.0166413	YES					+*	+*	+*			+*	+*
Mouse StemCell_Ramos06_1482genes (17009876-tableS1a)	GeneSigDB	5	3.06263	1.44456	0.0172524	0.018722	YES	++	++					++		++		++
TACTTGA,MIR-26A,MIR-26B	MSigDB_C3	5	3.05703	1.12382	0.0142248	0.0184758	YES		++	++		++		++				++
CHEMNITZ_RESPONSE_TO_PROSTAGLANDIN_E2_UP	MSigDB_C2	5	3.05623	1.6004	0.0225144	0.0190683	YES	+*/**	+*/*+		+*/+*			+*/*+		+*/*+
ALFANO_MYC_TARGETS	MSigDB_C2	5	3.05437	1.1263	0.0135176	0.0174102	YES	+*	++			++		++				+*
Notch_T-ALL_Weng_UP	SignatureDB	5	3.05165	0.979446	0.0171608	0.0158371	YES	+*/**				+*/**		+*/**			+*/*+	+*/**
PID_EPOPATHWAY	MSigDB_C2	5	3.02685	0.409851	0.0184605	0.0142828	YES	+*						+*		+*	+*	+*
STK33_NOMO_DN	MSigDB_C6	5	3.02398	0.390876	0.00729439	0.00768573	YES	**/+*	**/+*	**/+*	**/+*							+*/+*
NUCLEOLAR_PART	MSigDB_C5	5	3.02388	0.458067	0.0159859	0.0111224	YES	+*	+*			+*	+*	+*
Notch_T-ALL_Sharma_UP	SignatureDB	5	3.0134	0.426901	0.0230602	0.0169362	YES				+*/**	+*/**	+*/**			+*/**		+*/**
Human StemCell_Roth05_33genes (15741219-Table3)	GeneSigDB	5	3.01257	0.301102	0.00956045	0.00681142	YES	+*	+*			+*		+*			+*
MODULE_171	MSigDB_C4	5	3.00611	1.02299	0.0196999	0.0204009	YES			+*			+*	+*	+*	+*
MORF_RRM1	MSigDB_C4	5	2.99857	2.05034	0.0325913	0.0194521	YES		+*			+*		+-			+*	+*
LIGASE_ACTIVITY	MSigDB_C5	5	2.99844	0.603459	0.0096291	0.0115179	YES	+*	+*			+*		+*			+-
SCIBETTA_KDM5B_TARGETS_DN	MSigDB_C2	5	2.99518	0.493931	0.0108487	0.0120306	YES	**/+*	**/+*			**/++		**/+*		**/+*
Dendritic_cell_CD123pos_tonsil	SignatureDB	5	2.98534	0.418017	0.0198022	0.0101241	YES	+*	+*				+*			+*		+*
Human Leukemia_Wilson06_50genes_DifferentialClusterC (16597596-TableS2-3)	GeneSigDB	5	2.98274	0.160505	0.00901364	0.00440302	YES	+*	+*			+*		+*				+*
Human Lymphoma_OrtegaPaino08_46genes (18024791-Table2)	GeneSigDB	5	2.98068	0.53584	0.016945	0.0176692	YES	+*				+*		+*		+*		+*
ORGANELLE_MEMBRANE	MSigDB_C5	5	2.9804	1.27748	0.0145639	0.0149488	YES	+*	+*			+*	+-	+-
MODULE_133	MSigDB_C4	5	2.98021	0.672257	0.0254026	0.0194404	YES	+*	+*			+*		+*				+*
WEST_ADRENOCORTICAL_TUMOR_UP	MSigDB_C2	5	2.97939	1.57276	0.0179801	0.0171878	YES	+*/*+	+*/*+			+*/-+		+-/*+			+*/*+
KEGG_VALINE_LEUCINE_AND_ISOLEUCINE_DEGRADATION	MSigDB_C2	5	2.97597	0.751747	0.0174292	0.0133303	YES	+*	+*	+*		+*	+*
Human Lymphoma_Germinal07_44genes (19455257-TableS9)	GeneSigDB	5	2.97245	0.705479	0.0156806	0.0113666	YES	++	++	+*				++				++
Human Breast_Parker09_50genes_IntrinsicGenes_PAM50 (19204204-SupplementaryTable8)	GeneSigDB	5	2.97214	0.55877	0.0146328	0.0127238	YES		+*			+*		+*			+*	+*
REACTOME_KERATAN_SULFATE_BIOSYNTHESIS	MSigDB_C2	5	2.97159	0.517685	0.021862	0.00878836	YES				+*	++	+*				++	+*
DNA_REPAIR	MSigDB_C5	5	2.96931	1.07318	0.0166104	0.0195473	YES	+*	+*			+*		+-			+*
Human Lymphoma_Germinal07_77genes (19455257-TableS8)	GeneSigDB	5	2.96363	0.699419	0.0156806	0.0113666	YES	++	++	+*				++				++
Human Leukemia_Wlodarski08_51genes (18086899-Table5)	GeneSigDB	5	2.96154	1.17893	0.0282838	0.0207176	YES		+*	+*				+*		+*		+*
MARTORIATI_MDM4_TARGETS_FETAL_LIVER_DN	MSigDB_C2	5	2.95301	1.16847	0.0133805	0.0120273	YES	**/+*	*+/++					+*/++		**/++		**/+*
chr13q14	MSigDB_C1	5	2.949	0.609379	0.0150752	0.0186085	YES					+*	+-	+*			+*	+*
DOUGLAS_BMI1_TARGETS_UP	MSigDB_C2	5	2.94588	1.30881	0.0189075	0.0224821	YES	++/++	++/*+		+-/**			++/++	+*/**
MODULE_299	MSigDB_C4	5	2.94571	0.793524	0.0203694	0.0156524	YES	+*			+*	+*		+*			+*
Human BoneMarrow_Zhan02_69genes (11861292-Table5)	GeneSigDB	5	2.94163	0.945727	0.0215029	0.023599	YES		+*			+*		+*			+*	+*
ST_GA13_PATHWAY	MSigDB_C2	5	2.93923	0.764515	0.0183475	0.01882	YES	+*	+*			+*		+*				+*
Human Ovarian_Denkert09_300genes (19294737-SuppTable2)	GeneSigDB	5	2.93537	1.18176	0.0179969	0.0212058	YES	++	++	+*		++		++
STARK_HYPPOCAMPUS_22Q11_DELETION_UP	MSigDB_C2	5	2.93443	0.79545	0.0220528	0.0198387	YES	+*/**			+*/**	++/**	+*/**			+*/**
SANSOM_APC_TARGETS	MSigDB_C2	5	2.93427	0.570243	0.00901366	0.00719028	YES		++		+*	+*		+*				+*
Human Lymphoma_Saez09_67genes (19373655-Table2)	GeneSigDB	5	2.93342	0.696371	0.014521	0.00751222	YES		+*		+*	+*	+*	+*
KRIEG_HYPOXIA_NOT_VIA_KDM3A	MSigDB_C2	5	2.93043	1.03971	0.0110002	0.00983222	YES	++	++					++		+*		+*
MODULE_208	MSigDB_C4	5	2.92283	1.00575	0.0217548	0.0186848	YES			+*	+*		+*	+*	+*
Human Lymphoma_Piccaluga07_80genes (18006812-TableS5)	GeneSigDB	5	2.9227	0.654795	0.0172989	0.0164001	YES	+*	+*		+*			+*		+*
Human Breast_Waddell08_200genes_BRCA2missense (18497862-TableS4)	GeneSigDB	5	2.9147	0.778383	0.0137572	0.0144676	YES	+*	+*				+*		+*		+*
MORF_PRKACA	MSigDB_C4	5	2.91467	0.798526	0.0141021	0.0148935	YES	+*	+*			+*	+*				+*
Human Leukemia_Erkeland06_68genes (16423987-SuppTable3g)	GeneSigDB	5	2.90769	0.613771	0.0168191	0.00771237	YES	+*	++	+*				++				++
HOEBEKE_LYMPHOID_STEM_CELL_UP	MSigDB_C2	5	2.8919	1.34778	0.0194793	0.0121499	YES	++/**	++/**			++/*+		++/**			+*/**
Rat Prostate_Reyes05_189genes (15486989-table2)	GeneSigDB	5	2.88926	0.605596	0.0142788	0.0153008	YES	++	++	++				++		+*
MORF_BNIP1	MSigDB_C4	5	2.88695	0.993951	0.0178298	0.0161081	YES			+*	+*	+-	+*			+*
Human Breast_MorenoBueno06_117genes (17018611-Table2)	GeneSigDB	5	2.88089	0.290216	0.0133698	0.00565809	YES	+*			+*		++		++			+*
RESPONSE_TO_OXIDATIVE_STRESS	MSigDB_C5	5	2.8746	0.570861	0.0209527	0.0181646	YES	+*	+*	+*					+*		+*
Human Prostate_Chambers09_47genes (19489030-SuppTable5)	GeneSigDB	5	2.87055	0.371518	0.0225544	0.0128156	YES	+*			+*			+*	+*			+*
Human Immune_Kong10_112genes_ImmPort_CentroblastvsNaive (20460173-ImmPortCentroblastvsNaive)	GeneSigDB	5	2.86846	0.423202	0.0130958	0.0105545	YES	++	++					++		+*		++
BYSTRYKH_HEMATOPOIESIS_STEM_CELL_AND_BRAIN_QTL_CIS	MSigDB_C2	5	2.86714	0.415157	0.0130806	0.0071644	YES	+*	+*	+*				+*				+*
V$YY1_02	MSigDB_C3	5	2.86159	0.644015	0.0130205	0.0172557	YES	+*		+*		+*		+-			+*
DNA_METABOLIC_PROCESS	MSigDB_C5	5	2.86089	2.90336	0.00859283	0.0144329	NO	+*	+*			+*	-*	+*
HRAS_overexpression_2x_UP	SignatureDB	5	2.85012	0.968566	0.0178893	0.0130485	YES	+*/**		+*/*+			++/**			+*/*+		+*/**
MTOR_UP.V1_UP	MSigDB_C6	5	2.84614	0.382065	0.0101314	0.008574	YES		+*/*+		+*/-+			+*/-+			+*/**	+*/**
GALACTOSYLTRANSFERASE_ACTIVITY	MSigDB_C5	5	2.83999	0.948338	0.0367865	0.0193859	YES				+*	+*	+*	+*			+*
Human StemCell_West07_350genes (17234769-TableS2a)	GeneSigDB	5	2.83678	1.63978	0.0234891	0.0182218	YES	+*	+*			+*		+-			+*
GNF2_BNIP2	MSigDB_C4	5	2.83304	0.756231	0.0215798	0.0142328	YES	+*	+*				+*	+*				+*
MODULE_331	MSigDB_C4	5	2.82657	0.733583	0.0188719	0.0192721	YES	+*	+*			+*		+*		+*
TRANSCRIPTION_FROM_RNA_POLYMERASE_II_PROMOTER	MSigDB_C5	5	2.82646	1.23021	0.0156864	0.0137006	YES	+*	+*			+*	+*	+*
LENAOUR_DENDRITIC_CELL_MATURATION_UP	MSigDB_C2	5	2.81721	0.554088	0.0154845	0.0148658	YES	+*/*+		++/**				++/++		++/**		++/++
PEREZ_TP53_TARGETS	MSigDB_C2	5	2.8136	0.373116	0.00701522	0.00671933	YES			++	++		++			+*		++
VANOEVELEN_MYOGENESIS_SIN3A_TARGETS	MSigDB_C2	5	2.8099	0.797768	0.0182174	0.022948	YES	+*	+*		+*	+*		+*
SH3_SH2_ADAPTOR_ACTIVITY	MSigDB_C5	5	2.80903	0.317509	0.0210816	0.0160067	YES		+*	+*			+*	+*		+*
YOKOE_CANCER_TESTIS_ANTIGENS	MSigDB_C2	5	2.80597	0.787579	0.0273349	0.0155573	YES	+*			+*			+*	+*			+*
KYNG_WERNER_SYNDROM_AND_NORMAL_AGING_DN	MSigDB_C2	5	2.79287	0.926328	0.0160363	0.0173117	YES	**/+*	**/+*			**/+*		+*/+*			**/+*
MAGNESIUM_ION_BINDING	MSigDB_C5	5	2.78485	0.471327	0.0149511	0.0103347	YES	+*	+*				+*	+*			+*
RHEIN_ALL_GLUCOCORTICOID_THERAPY_UP	MSigDB_C2	5	2.78452	0.637909	0.0221388	0.0169456	YES	++/++		+*/**			++/**			++/**		++/+*
REACTOME_ACTIVATION_OF_ATR_IN_RESPONSE_TO_REPLICATION_STRESS	MSigDB_C2	5	2.78196	0.628508	0.0201813	0.0161024	YES	+*	+*			+*		+-			+*
HYDROLASE_ACTIVITY_ACTING_ON_CARBON_NITROGEN_NOT_PEPTIDEBONDSIN_CYCLIC_AMIDINES	MSigDB_C5	5	2.78114	0.428713	0.0389372	0.00454981	YES		+*	+*				+*		+*		+*
Human Breast_Yau07_103genes (17850661-TableS4)	GeneSigDB	5	2.77952	0.689978	0.0187585	0.0134054	YES	++					+*	++	+*			+*
Human Breast_Speers09_52genes_OverExpressedNegativeCancer (19808870-ST2)	GeneSigDB	5	2.76985	0.480858	0.0174993	0.0142855	YES	+*	+*	+*		++		+*
GNF2_FOS	MSigDB_C4	5	2.76605	0.424959	0.021531	0.0171464	YES	+*	+*		+*			+*		+*
BOYLAN_MULTIPLE_MYELOMA_PCA3_DN	MSigDB_C2	5	2.76327	0.667331	0.0200578	0.016611	YES	*+/+*	**/+*				**/+*	**/+*				**/+*
MORF_ACP1	MSigDB_C4	5	2.76264	3.67872	0.00624783	0.00762729	NO	+*				+*		+-	--		+*
TRANSCRIPTION_COFACTOR_ACTIVITY	MSigDB_C5	5	2.75843	0.942491	0.0172628	0.0170071	YES	+*	+*			+*	+*	+*
POSITIVE_REGULATION_OF_SIGNAL_TRANSDUCTION	MSigDB_C5	5	2.74788	0.60366	0.0208099	0.019807	YES	++			+*		+*	+*		+*
Human Breast_van'tVeer02_231genes_PoorPrognosisSignature (11823860-SuppTable2)	GeneSigDB	5	2.74192	0.596595	0.0142958	0.0120021	YES	++	+*		+*			+*				+*
PID_MET_PATHWAY	MSigDB_C2	5	2.73777	0.886184	0.0206779	0.0175017	YES		++			++		+*	+*		+*
ADDYA_ERYTHROID_DIFFERENTIATION_BY_HEMIN	MSigDB_C2	5	2.73605	0.578059	0.0226288	0.0212658	YES	+*	+*	+*				+*		+*
Mouse StemCell_Chambers07_1521genes (17676974-TableS2)	GeneSigDB	5	2.73594	3.19132	0.000900294	0.00107216	NO	++			--	+*		+-			+*
GHANDHI_DIRECT_IRRADIATION_UP	MSigDB_C2	5	2.73207	0.30198	0.0163732	0.0108914	YES	+*/**	+*/**						+*/*+	+*/**		+*/**
GAURNIER_PSMD4_TARGETS	MSigDB_C2	5	2.73079	0.464061	0.0175356	0.0141382	YES	+*	+*					+*	+*			+*
GRUETZMANN_PANCREATIC_CANCER_DN	MSigDB_C2	5	2.7302	0.716208	0.0140254	0.00818187	YES	*+/+*	*+/+*					++/+*			*+/+*	*+/+*
Human Colon_Yokoe08_38genes (18281482-Table1)	GeneSigDB	5	2.71954	0.16662	0.0219033	0.00952986	YES	+*						+*	+*		+*	+*
NEGATIVE_REGULATION_OF_METABOLIC_PROCESS	MSigDB_C5	5	2.71823	0.444747	0.0100112	0.0080949	YES	+*	++			++	+*	++
Mouse Prostate_Ouyang08_121genes (18381418-Table1)	GeneSigDB	5	2.7146	0.639824	0.0208862	0.0168791	YES	+*		+*	+*	+*		+*
PHONG_TNF_RESPONSE_VIA_P38_COMPLETE	MSigDB_C2	5	2.70073	0.794066	0.0204409	0.0210252	YES	++				++	++	++		++
MULLIGHAN_NPM1_MUTATED_SIGNATURE_1_UP	MSigDB_C2	5	2.69868	0.809067	0.0179545	0.0170878	YES	+*/+*	++/**		+*/**	++/**		+*/+*
PHONG_TNF_RESPONSE_VIA_P38_PARTIAL	MSigDB_C2	5	2.6832	1.11292	0.024531	0.0192669	YES	++	++	+*				++				++
Human StemCell_Hao09_173genes (20077526-TableS5)	GeneSigDB	5	2.67502	0.848414	0.0246874	0.0194896	YES			+*			+*	++	+*			++
REGULATION_OF_MAP_KINASE_ACTIVITY	MSigDB_C5	5	2.67362	0.822602	0.0271469	0.0203475	YES		+*		+*		+*	+*	+*
PROTEIN_TYROSINE_PHOSPHATASE_ACTIVITY	MSigDB_C5	5	2.67186	0.312926	0.0252309	0.0122914	YES				+*		+*	+*		+*		+*
ATCATGA,MIR-433	MSigDB_C3	5	2.66009	0.535067	0.0186395	0.0113544	YES		+*	+*		++					+*	+*
AATGTGA,MIR-23A,MIR-23B	MSigDB_C3	5	2.65237	0.486748	0.0138923	0.0141609	YES		++		++		+*	++				++
KEGG_CHEMOKINE_SIGNALING_PATHWAY	MSigDB_C2	5	2.64672	0.413979	0.0154125	0.015806	YES	+*	+*	+*				+*	+*
Human Viral_Ciccaglione08_56genes (18590516-TableS4)	GeneSigDB	5	2.63946	0.504249	0.0208862	0.0133601	YES	+*	+*			+*		+*				+*
STAMBOLSKY_RESPONSE_TO_VITAMIN_D3_UP	MSigDB_C2	5	2.62879	0.516438	0.0252688	0.0146518	YES	+*/**		+*/**	+*/**		++/**			++/**
STEIN_ESRRA_TARGETS_DN	MSigDB_C2	5	2.62528	0.286947	0.0128017	0.00704141	YES	++/++	+*/+*			+*/++		+*/+*			**/+*
MODULE_151	MSigDB_C4	5	2.62448	3.4866	0.0135576	0.014693	NO	+*	+-			+*	-*	+-
JOHNSTONE_PARVB_TARGETS_2_DN	MSigDB_C2	5	2.61276	3.03084	0.0141166	0.0149711	NO		-+/++		**/++	-+/++		**/++			**/-+
CHIARETTI_ACUTE_LYMPHOBLASTIC_LEUKEMIA_ZAP70	MSigDB_C2	5	2.61046	0.488116	0.0233113	0.0172128	YES					++	++	+*	+*	+*
Human StemCell_Macaulay07_516genes (17192395-TableS2b)	GeneSigDB	5	2.60897	1.09421	0.0211878	0.0142986	YES	++	++	+*				++		++
DAZARD_RESPONSE_TO_UV_NHEK_UP	MSigDB_C2	5	2.60808	1.08304	0.0243563	0.0198711	YES	+*/++	+*/++			+*/++		+-/++			++/*+
Human Leukemia_Stam09_150genes_Figure4 (20032505-TableS6)	GeneSigDB	5	2.60495	0.531466	0.0165183	0.00972107	YES	+*	+*			+*	+*	+*
GNF2_MCL1	MSigDB_C4	5	2.60185	0.478454	0.0249555	0.014805	YES	+*	+*	+*				+*	+*
BROWNE_INTERFERON_RESPONSIVE_GENES	MSigDB_C2	5	2.5993	2.82067	0.0102011	0.0105712	NO	+*			+*	+*		+*			-*
RESPONSE_TO_BIOTIC_STIMULUS	MSigDB_C5	5	2.58328	0.622142	0.0227687	0.0203063	YES	+*	+*		+*			+*			+*
TAKAO_RESPONSE_TO_UVB_RADIATION_DN	MSigDB_C2	5	2.58019	0.531256	0.0203063	0.0149698	YES	**/+*	**/+*			**/++		+*/+*				**/+*
DELYS_THYROID_CANCER_UP	MSigDB_C2	5	2.55593	0.469581	0.0182726	0.018143	YES	++/*+			+*/*+				+*/+*	+*/**		++/**
ATAAGCT,MIR-21	MSigDB_C3	5	2.5529	0.283424	0.0228232	0.0126435	YES			++	+*		+*	+*		+*
Mouse Liver_Jeong06_492genes (16423883-Table2S)	GeneSigDB	5	2.54834	0.570056	0.0226697	0.0186749	YES	+*	+*				++			+*		+*
BROWNE_HCMV_INFECTION_20HR_DN	MSigDB_C2	5	2.54363	0.582001	0.0284092	0.0182645	YES	+*/++			**/+*		**/++			**/++		**/++
Mouse Lung_not_cancer_Thimmulappa06_38genes (16585964-SuppTable1)	GeneSigDB	5	2.53174	0.336071	0.0266332	0.0116595	YES	+*	+*			+*		+*				+*
REACTOME_CELL_CYCLE_CHECKPOINTS	MSigDB_C2	5	2.52889	2.80372	0.00832944	0.0112257	NO		+-			+*	-*	+-			+*
TONKS_TARGETS_OF_RUNX1_RUNX1T1_FUSION_HSC_UP	MSigDB_C2	5	2.52513	0.543307	0.01833	0.0124491	YES	++/+*	++/++		+*/**		++/*+	++/++
FORTSCHEGGER_PHF8_TARGETS_UP	MSigDB_C2	5	2.52097	0.521111	0.0224457	0.0217333	YES	++/++	+*/++		+*/+*				+*/**	+*/*+
ATGAAGG,MIR-205	MSigDB_C3	5	2.51787	0.437463	0.0239133	0.0168394	YES			+*	+*			+*	+*			+*
Blood_Module-3.1_Interferon_inducible	SignatureDB	5	2.5161	3.12669	0.0183747	0.0194521	NO	+-			+*	+*		+*			-*
MODULE_179	MSigDB_C4	5	2.51302	0.583378	0.0193834	0.0160722	YES		++	+*	++		++	++
Human Leukemia_Chiaretti06_75genes (16160012-Table1)	GeneSigDB	5	2.51126	0.47853	0.0263462	0.0156566	YES					++	++	+*	+*	+*
REGULATION_OF_DEVELOPMENTAL_PROCESS	MSigDB_C5	5	2.49272	0.215181	0.0138392	0.00593799	YES	++		+*				+*	+*			+*
STK33_SKM_DN	MSigDB_C6	5	2.48115	0.490052	0.0221821	0.0197664	YES	+*/+*	++/++	**/++			*+/++					+*/++
MODULE_255	MSigDB_C4	5	2.47419	0.70453	0.0242216	0.02073	YES	++		+*	++		++	++
Human Leukemia_Verhaak05_568genes (16109776-TableS1)	GeneSigDB	5	2.4671	2.44703	0.0141402	0.0210369	NO		++					++		++	-+	++
LIU_SOX4_TARGETS_UP	MSigDB_C2	5	2.46245	0.469824	0.0210454	0.0121357	YES	+*/+*				++/++	+*/**	++/+*				++/**
RESPONSE_TO_OTHER_ORGANISM	MSigDB_C5	5	2.45955	0.291744	0.0254566	0.010931	YES	+*			+*			+*	+*		+*
BIOCARTA_MAPK_PATHWAY	MSigDB_C2	5	2.45318	0.393483	0.0295545	0.0191704	YES		++	+*	+*		++	+*
chr14q11	MSigDB_C1	5	2.44162	0.473891	0.0239781	0.0164559	YES	+*		+*		+*		+*			+*
V$AREB6_04	MSigDB_C3	5	2.41668	0.393608	0.0218744	0.0105892	YES				+*			++	+*	+*	++
REACTOME_DNA_REPLICATION	MSigDB_C2	5	2.4069	2.84604	0.0124364	0.017566	NO		+*	--		+-		+-			+-
Human StemCell_Qi03_534genes (12631704-table1)	GeneSigDB	5	2.40504	2.68703	0.0154039	0.0207568	NO	++	++	-*		++		++
GOLGI_APPARATUS	MSigDB_C5	5	2.39139	0.391069	0.0248545	0.020979	YES	+*		+*	+*		+*	+*
Human Pancreas_Cavard09_736genes (19235837-TableS2a)	GeneSigDB	5	2.3753	0.42854	0.0181839	0.0128752	YES	++	++		++	++		++
RICKMAN_METASTASIS_DN	MSigDB_C2	5	2.37104	0.71994	0.0288662	0.022631	YES	*+/+-		**/+*		**/+*		+*/+*			**/++
FORTSCHEGGER_PHF8_TARGETS_DN	MSigDB_C2	5	2.36894	0.644607	0.0233996	0.0171067	YES	++/++	+*/++	**/++	+*/+*							**/++
XU_GH1_AUTOCRINE_TARGETS_DN	MSigDB_C2	5	2.34803	0.540958	0.0285853	0.0157618	YES		**/++		**/++	**/++		*+/++		**/++
Mouse Breast_Astolfi05_1104genes_TumorGenes (15793299-TableC)	GeneSigDB	5	2.34313	0.597617	0.0247404	0.0204005	YES	++	++	++	+*							++
Human Breast_Rizki08_204genes (18316601-Table1)	GeneSigDB	5	2.33282	0.486483	0.0291273	0.0167988	YES		+*		+*		+*	++				+*
Human StemCell_Kumamoto08_2005genes (18451145-TableS1)	GeneSigDB	5	2.30786	0.444128	0.0199452	0.0151362	YES	++	++		++		++	++
RODRIGUES_THYROID_CARCINOMA_ANAPLASTIC_DN	MSigDB_C2	5	2.30117	0.52885	0.0263193	0.0194605	YES	+*/++			+-/++		**/++		*-/++		**/++
SCHLOSSER_SERUM_RESPONSE_DN	MSigDB_C2	5	2.27256	2.75376	0.0133745	0.0124359	NO	*+/++	**/++			*+/++		**/+*			+*/-+
RAO_BOUND_BY_SALL4_ISOFORM_B	MSigDB_C2	5	2.26344	0.238155	0.0211797	0.0119847	YES	++			+*	+*		+*	+*
MORF_RBBP8	MSigDB_C4	5	2.21134	0.297378	0.0291767	0.0144075	YES					+*	+*	+*		+*	+*
DOUGLAS_BMI1_TARGETS_DN	MSigDB_C2	5	2.20545	0.379929	0.0278129	0.0185567	YES	++/++		*+/+*		*+/++	*+/+*	++/++
KAUFFMANN_DNA_REPAIR_GENES	MSigDB_C2	5	2.18852	2.88712	0.0192152	0.0152894	NO		+*			+*	-*	+-			+*
BRUINS_UVC_RESPONSE_VIA_TP53_GROUP_D	MSigDB_C2	5	2.16581	0.147807	0.0299666	0.00879546	YES	+*	++	+*			++			+*
GENTILE_RESPONSE_CLUSTER_D3	MSigDB_C2	5	2.16305	0.0988732	0.0389024	0.00672627	YES		+*	+*		+*		+*			+*
Human Lymphoma_Piccaluga07_185genes (17304354-Table2s)	GeneSigDB	5	2.14548	2.40811	0.020972	0.0210918	NO		+*		+*	-+		++				++
MORF_MAP2K2	MSigDB_C4	5	2.08252	2.50866	0.015566	0.0144809	NO	+*				+*		+-	-*		+-
BURTON_ADIPOGENESIS_5	MSigDB_C2	5	1.98836	2.37645	0.0166795	0.0143534	NO	+*	+*			+*		+*	-*
Human Breast_Wirapati08_355genes_AURKA_Module (18662380-S3-AURKA)	GeneSigDB	5	1.96022	4.50064	0.00598389	0.00483777	NO	-+	++				-*	+*	+*
DACOSTA_UV_RESPONSE_VIA_ERCC3_UP	MSigDB_C2	5	1.93226	2.14374	0.0149297	0.0178917	NO	+*/++	+*/++		-*/+*	+*/++		+-/++
MORF_TPR	MSigDB_C4	5	1.90347	2.29518	0.00837752	0.00504544	NO	++	++			+*		+*	-*
MORF_AP3D1	MSigDB_C4	5	1.79933	2.17988	0.0147251	0.0116606	NO	+*				+*		+-	-*		+*
Mouse StemCell_Schimmer06_328genes (16484322-SuppTable2)	GeneSigDB	5	1.7804	2.5913	0.0171134	0.0208401	NO	+*				++		+*	-*			+*
PARENT_MTOR_SIGNALING_UP	MSigDB_C2	5	1.72426	2.25787	0.0276521	0.0169874	NO	++/**	-*/**		+*/**	++/**		+*/**
Resting_monocyte_GNF	SignatureDB	5	1.64207	2.11523	0.0148855	0.00850749	NO	+*	+*			-+		+*		+*
Monocyte_8x_U133plus	SignatureDB	5	1.61262	2.0643	0.0275835	0.0150095	NO	+*	+*					++	-*			+*
MODULE_252	MSigDB_C4	5	1.56619	4.14644	0.0117817	0.0191533	NO			-*		+*	-*	+*	+*
REACTOME_MRNA_PROCESSING	MSigDB_C2	5	1.55559	3.55892	0.0219928	0.017605	NO			--		+*		+-			+-	-*
ACCATTT,MIR-522	MSigDB_C3	5	1.49133	2.18943	0.0214337	0.0163341	NO	+*	+*				+*	+*			-*
CHARAFE_BREAST_CANCER_LUMINAL_VS_MESENCHYMAL_DN	MSigDB_C2	5	0.833234	2.58191	0.0199279	0.0113651	NO				**/+*	*+/-+				+*/++	+*/-+	**/++
SMID_BREAST_CANCER_LUMINAL_B_DN	MSigDB_C2	5	0.389919	2.63349	0.019145	0.0171262	NO			**/++		**/-+		*+/++			**/-+	*+/++
MODULE_27	MSigDB_C4	5	0.288231	2.64626	0.0274772	0.0172083	NO				+*	-+			++	+*	-*
Mouse StemCell_Read09_438genes (19185848-TableS1)	GeneSigDB	5	-0.179061	2.32101	0.028466	0.0113316	NO	-+	-*			-*			++		+*
Mouse EmbryonicStemCell_Abranches09_1170genes (19621087-Table1d)	GeneSigDB	5	-0.296158	2.48632	0.0268386	0.0200009	NO					-+		-+	++	++	-+
Human Leukemia_Schoch05_1374genes (15902281-TableS1e)	GeneSigDB	5	-0.394529	2.47014	0.0207582	0.0155343	NO	-+				-*		++		+*	-*
V$SRY_02	MSigDB_C3	5	-0.452156	2.49621	0.01973	0.0136845	NO			++	++	-+		-+			-*
chr19p13	MSigDB_C1	5	-1.44001	2.56784	0.0122417	0.0171574	NO	-+	-*		-*			-+			+-
Testis_Node1662	SignatureDB	5	-1.88397	0.0668752	0.0346189	0.00704732	YES	-*	-*			-*		-*			-*
V$MYOD_Q6	MSigDB_C3	5	-2.04135	0.270043	0.0242785	0.0129396	YES		-*	-*		-*			-*		-*
Human StemCell_Huang08_60genes_MSCs (18308945-Table2)	GeneSigDB	5	-2.1297	0.271336	0.020391	0.0182872	YES	-+	-+			-+		-+			-+
MODULE_129	MSigDB_C4	5	-2.16435	0.524928	0.0228152	0.0186864	YES	-+	-+	-+		-+					-+
V$HOXA4_Q2	MSigDB_C3	5	-2.16965	0.286229	0.01843	0.0146848	YES	-+	-*			-+					-*	-*
BMI1_DN.V1_UP	MSigDB_C6	5	-2.17315	0.46556	0.0212964	0.0142651	YES	-+/**	-+/**			-+/*+		-+/*+			-+/*+
MODULE_104	MSigDB_C4	5	-2.19554	0.740205	0.0278737	0.0195277	YES	-*	-*	-*				-+			--
DCA_UP.V1_UP	MSigDB_C6	5	-2.26505	0.438381	0.0164869	0.0136146	YES	-*/**				--/**		-*/**			-*/**	-*/**
RICKMAN_HEAD_AND_NECK_CANCER_E	MSigDB_C2	5	-2.27996	0.292946	0.0129188	0.0117883	YES	-*	--			--		-*			-*
ANASTASSIOU_CANCER_MESENCHYMAL_TRANSITION_SIGNATURE	MSigDB_C2	5	-2.31986	0.535119	0.0152001	0.0122679	YES	-+	-+			-+		-+			-+
chr1q21	MSigDB_C1	5	-2.33911	0.487313	0.0132228	0.0115193	YES	-*	-*			-*	-*			-*
Human Leukemia_Schoch05_1052genes (15902281-TableS1a)	GeneSigDB	5	-2.39678	0.468411	0.0122078	0.0123219	YES	-+			-+	-+		-+			-+
ANATOMICAL_STRUCTURE_MORPHOGENESIS	MSigDB_C5	5	-2.4401	0.472845	0.0111169	0.0111786	YES	-*	-+		--			-+			-*
ACEVEDO_METHYLATED_IN_LIVER_CANCER_DN	MSigDB_C2	5	-2.44054	0.431213	0.0132309	0.0203563	YES	-*				-*		-+			-*	-*
ION_TRANSMEMBRANE_TRANSPORTER_ACTIVITY	MSigDB_C5	5	-2.44147	0.85183	0.0228028	0.0214551	YES	-*	-*			-*		-+			-*
G_PROTEIN_COUPLED_RECEPTOR_PROTEIN_SIGNALING_PATHWAY	MSigDB_C5	5	-2.48132	0.707055	0.0163264	0.0182405	YES					-*	-*	-+		-*	-*
GATAAGR_V$GATA_C	MSigDB_C3	5	-2.49137	0.510104	0.0108716	0.0121377	YES	-+	-+			-+		-+			-+
CELL_CELL_SIGNALING	MSigDB_C5	5	-2.49732	0.731484	0.0146321	0.013375	YES		-*	-*		-*		-+			-*
chr17p13	MSigDB_C1	5	-2.51238	0.425857	0.00736992	0.00643765	YES	--	-*			--	-*				-*
EXTRACELLULAR_REGION	MSigDB_C5	5	-2.51819	0.689106	0.0143462	0.0157075	YES		-+			-+	-+	-+			-+
MODULE_95	MSigDB_C4	5	-2.52162	0.450255	0.0108851	0.0175457	YES	-*				-*	-*	-+			-*
KRAS.600_UP.V1_UP	MSigDB_C6	5	-2.52164	0.697081	0.0134114	0.0138987	YES	-*/**	-*/-*			-*/--		-+/**			-+/**
Human Lymphoma_Piccaluga07_260genes (18006812-TableS1)	GeneSigDB	5	-2.52703	0.603427	0.0118969	0.0169389	YES	-+	-+			-+	-+				-+
MODULE_163	MSigDB_C4	5	-2.54306	0.46246	0.0102008	0.0160303	YES	-*				-*	-*	-+			-*
GNF2_LCAT	MSigDB_C4	5	-2.5501	0.72677	0.0154737	0.0193134	YES	-*	-*			-*		-*			-*
PICCALUGA_ANGIOIMMUNOBLASTIC_LYMPHOMA_UP	MSigDB_C2	5	-2.55116	0.596547	0.0108916	0.0154621	YES	-+/*+	-+/*+			-+/*+	-+/+*				-+/*+
Normal_mesenchymal-1_Node1643	SignatureDB	5	-2.56039	0.36853	0.00524351	0.00620591	YES	-+	-+			-+		-+			-+
GNF2_HPX	MSigDB_C4	5	-2.57737	0.787742	0.0144913	0.0168241	YES	-*	-*			-*		-*			-*
SUBSTRATE_SPECIFIC_TRANSMEMBRANE_TRANSPORTER_ACTIVITY	MSigDB_C5	5	-2.59003	0.747677	0.012847	0.0137081	YES	-*				-*		-+		-*	-*
SYNAPTIC_TRANSMISSION	MSigDB_C5	5	-2.61753	0.828922	0.0165985	0.0221497	YES		-*	-*		-*		-*				-*
SUBSTRATE_SPECIFIC_TRANSPORTER_ACTIVITY	MSigDB_C5	5	-2.63848	0.540664	0.006515	0.00610628	YES	-*				-*		-+		-*	-*
TATAAA_V$TATA_01	MSigDB_C3	5	-2.71449	0.772767	0.0106241	0.014657	YES	-+	-+			-+	-*				-+
MODULE_88	MSigDB_C4	5	-2.72024	0.868898	0.0124086	0.016121	YES		-*			-*		-+			-+	-*
TRANSMISSION_OF_NERVE_IMPULSE	MSigDB_C5	5	-2.75738	0.896169	0.012185	0.0162991	YES		-*	-*		-*		-*				-*
Human Immune_Kong10_456genes_ImmPort_Cytokines (20460173-ImmPortCytokines)	GeneSigDB	5	-2.76509	0.832584	0.0103229	0.0150886	YES	-*				--	-*	-+			-*
TRANSMEMBRANE_TRANSPORTER_ACTIVITY	MSigDB_C5	5	-2.82145	0.840017	0.00818226	0.00939031	YES	-*				--		-+		-*	-*
MODULE_99	MSigDB_C4	5	-2.93024	0.686673	0.00487463	0.00613694	YES	-+	-+			-*		-+			-*
MULTICELLULAR_ORGANISMAL_DEVELOPMENT	MSigDB_C5	5	-2.97964	0.733906	0.00479645	0.00656018	YES	-+	-+			-+		-+			-*
NERVOUS_SYSTEM_DEVELOPMENT	MSigDB_C5	5	-2.98194	0.671841	0.00495772	0.00951361	YES	-+	-+			-*	-+	-+
CNS_Node1661	SignatureDB	5	-3.00267	0.415725	0.000988754	0.00123791	YES	-+	-+			-+		-+			-+
CNS_PNS_Node1663	SignatureDB	5	-3.07719	0.968829	0.0104873	0.0217863	YES		-*	-*		-+		-+			-*
BENPORATH_PRC2_TARGETS	MSigDB_C2	5	-3.29595	1.18912	0.00324881	0.0037258	YES	-*	-*			--		-+			-*
MODULE_117	MSigDB_C4	5	-3.40181	0.728282	0.0011354	0.00142809	YES	-*				--	-*	-+			-*
BENPORATH_SUZ12_TARGETS	MSigDB_C2	5	-3.86355	1.42459	0.00112462	0.00160552	YES	-*	-*			-*		-+			-*
BENPORATH_ES_WITH_H3K27ME3	MSigDB_C2	5	-4.22348	1.71659	0.00190249	0.00404315	YES	-*	-*			-*		-+			-*
Human StemCell_Li05_279genes (15988031-TableS5)	GeneSigDB	4	7.815	3.23001	1.69123e-05	3.38225e-05	YES	+*	+-			+-		+-
Human StemCell_Manalo05_108genes (15374877-Table2)	GeneSigDB	4	6.19394	1.74029	1.76064e-05	2.61693e-05	YES		+*			+-		+-			+*
Metallothionein_Node595	SignatureDB	4	5.88468	2.34672	0.00249547	0.00456294	YES	+*	+*			+*		+*
chr18q23	MSigDB_C1	4	5.85241	2.14533	0.00227102	0.00450371	YES	+*				+*	+*				+*
GNF2_APEX1	MSigDB_C4	4	5.45081	3.36697	0.00830732	0.01643	YES		+*			+*		+-				+*
INTRACELLULAR_ORGANELLE_PART	MSigDB_C5	4	5.15933	3.21721	0.00344123	0.00574011	YES	+*	+*			+*		+-
RIBONUCLEOPROTEIN_COMPLEX_BIOGENESIS_AND_ASSEMBLY	MSigDB_C5	4	5.11371	1.34343	0.000330488	0.000612013	YES	+*	+*			+*		+-
Human Viral_Mimori08_6genes (19120899-Table2b)	GeneSigDB	4	5.10618	1.58747	0.00869593	0.00932616	YES					+*	+*		+*	+*
ORGANELLE_PART	MSigDB_C5	4	5.09946	3.21788	0.00392063	0.00651047	YES	+*	+*			+*		+-
Human Colon_Jorissen08_829genes (19088021-supptable2)	GeneSigDB	4	5.01691	2.29249	0.000805943	0.00158476	YES	++	++			++		++
Human Leukemia_Marcucci08_696genes (18450603-Table3S)	GeneSigDB	4	5.01577	2.54843	0.00289893	0.00569149	YES	+*	++					+*				+*
TONKS_TARGETS_OF_RUNX1_RUNX1T1_FUSION_MONOCYTE_UP	MSigDB_C2	4	4.87191	1.21745	0.000179157	0.000252392	YES	+*/**	++/**			++/*+		++/+*
Human Ovarian_Marchini08_2genes (19047114-Table4)	GeneSigDB	4	4.80248	0.992691	0.0165828	0.015943	YES		+*					+*			+*	+*
IVANOVA_HEMATOPOIESIS_INTERMEDIATE_PROGENITOR	MSigDB_C2	4	4.79666	2.26105	0.0035669	0.00704725	YES	+*	+*			+*		+*
GNF2_MLH1	MSigDB_C4	4	4.78304	3.43631	0.0150972	0.0229215	YES	+*				+-		+-				+*
Mouse InnerEar_Sajan08_2724genes (17660535-TableS4c)	GeneSigDB	4	4.77639	2.95954	0.0102811	0.0200948	YES	++	++					++		++
GNF2_XRCC5	MSigDB_C4	4	4.76335	3.72644	0.00922405	0.0128374	YES		+*			+-		+-	+*
ZHENG_RESPONSE_TO_ARSENITE_UP	MSigDB_C2	4	4.72766	1.96271	0.00640754	0.0111361	YES	+*/**	+*/**			+*/+*		+*/+*
Human Lung_not_cancer_Temple01_4genes (11694447-Table1)	GeneSigDB	4	4.70671	0.219611	0.0419283	0.0032963	YES			+*	+*					+*		+*
Human Viral_Chetaille09_666genes (19096012-TableS5)	GeneSigDB	4	4.69889	2.09406	0.000323521	0.000402872	YES	++	++			++		+*
Human Breast_Hu06_1400genes (16643655-1300GenesList)	GeneSigDB	4	4.68556	2.33744	0.00320176	0.00400769	YES	++	++					++				+*
BLALOCK_ALZHEIMERS_DISEASE_DN	MSigDB_C2	4	4.62332	2.46544	0.00112698	0.00191552	YES	++/++	++/++			*+/++		++/+*
ZHU_CMV_ALL_UP	MSigDB_C2	4	4.61456	1.37327	0.00031907	0.000405226	YES	+*/*+	+*/*+			+*/*+		+*/*+
NUCLEOLUS	MSigDB_C5	4	4.59288	0.730965	0.000173664	0.000259756	YES	+*	+*			+-		+-
IL6_Ly10_Up_group3	SignatureDB	4	4.55891	1.33257	0.00945376	0.0082891	YES	+*		+*	+*	+*
Human Leukemia_Lin06_02genes (16780769-Table2)	GeneSigDB	4	4.47266	0.575802	0.0262118	0.0159995	YES	+*						+*		+*		+*
Blood_Module-1.5_Myeloid_lineage-1	SignatureDB	4	4.44808	1.22034	0.00201789	0.00382274	YES	+*	+*		+*			+*
WANG_TUMOR_INVASIVENESS_UP	MSigDB_C2	4	4.43999	2.7	0.00247664	0.00358613	YES	+*/+*	++/+*			+*/++		+*/+*
V$GABP_B	MSigDB_C3	4	4.43567	1.68973	0.000476868	0.000435981	YES	+*	+-			+-		+-
GNF2_TNFRSF1B	MSigDB_C4	4	4.41963	1.95041	0.00936392	0.0179032	YES	+-	+*				+*	+*
Human Lung_not_cancer_Golpon04_150genes_NMLvsADLvsEML (15284076-TableE1)	GeneSigDB	4	4.3765	1.21815	0.00182161	0.00347767	YES		+*			+*		+-			+*
HASLINGER_B_CLL_WITH_6Q21_DELETION	MSigDB_C2	4	4.35825	0.606104	0.00200338	0.00255214	YES		+*			+*		+*				+*
3_5_EXONUCLEASE_ACTIVITY	MSigDB_C5	4	4.35395	1.11722	0.00564653	0.010636	YES	+*	+*			+*		+*
WATANABE_ULCERATIVE_COLITIS_WITH_CANCER_DN	MSigDB_C2	4	4.33976	1.34361	0.0145902	0.0191012	YES			**/+*			**/+*	*+/+*				*+/+*
MODULE_54	MSigDB_C4	4	4.33763	3.04706	0.0126829	0.0224231	YES		+-					+-	+*		+-
GNF2_NPM1	MSigDB_C4	4	4.32535	2.12465	0.0134392	0.0220298	YES		+*			+-		+-				+*
MORF_CSNK2B	MSigDB_C4	4	4.3219	3.38809	0.0103701	0.0116401	YES	+*				+*		+-			+*
SA_FAS_SIGNALING	MSigDB_C2	4	4.31533	0.469857	0.0124172	0.00770041	YES						+*		+*	+*		+*
SHIPP_DLBCL_VS_FOLLICULAR_LYMPHOMA_UP	MSigDB_C2	4	4.24584	2.71692	0.0112458	0.0134034	YES	+*/*+	+*/*+					+*/*+			+*/*+
MORF_DEAF1	MSigDB_C4	4	4.22423	1.34034	0.00663007	0.0114909	YES		+*			+*		+*				+*
MORF_DAP3	MSigDB_C4	4	4.21337	1.79658	0.00325837	0.00595288	YES	+*				+*		+-			+*
ATP_DEPENDENT_DNA_HELICASE_ACTIVITY	MSigDB_C5	4	4.20481	1.11323	0.0171265	0.0116895	YES			+*	+*			+*		+*
V$NRF2_01	MSigDB_C3	4	4.20057	1.74744	0.00320969	0.00484795	YES	+*	+-			+*		+-
DEBIASI_APOPTOSIS_BY_REOVIRUS_INFECTION_UP	MSigDB_C2	4	4.19955	1.81221	0.00579122	0.01118	YES	+*/**	+*/*+			++/*+		+*/+*
COLLER_MYC_TARGETS_UP	MSigDB_C2	4	4.1733	1.20471	0.00420697	0.00408439	YES		+*/*+			+*/*+		+*/*+				+*/**
VECCHI_GASTRIC_CANCER_EARLY_UP	MSigDB_C2	4	4.17278	3.37552	0.0154043	0.0213339	YES	+*/*+	+*/*+					+-/*+			+-/*+
Human StemCell_Kocer08_575genes (18667080-TableS9)	GeneSigDB	4	4.16019	3.5683	0.0127509	0.0121965	YES	++	++		+*			++
MODULE_83	MSigDB_C4	4	4.15915	2.62525	0.00738281	0.0125335	YES	+*				+*		+-			+*
REACTOME_S_PHASE	MSigDB_C2	4	4.15881	1.98323	0.0072502	0.00987331	YES		+*			+*		+-			+*
Myeloma_TACI_low_plasmablast_gene	SignatureDB	4	4.14683	2.54829	0.00813133	0.00925466	YES	+*	+*			+*		+-
Human Lung_not_cancer_Golpon04_242genes (15284076-TableE2)	GeneSigDB	4	4.13407	2.37291	0.0106897	0.0201922	YES		+*			+*		+-			+*
REACTOME_MITOCHONDRIAL_PROTEIN_IMPORT	MSigDB_C2	4	4.13298	1.72902	0.00565626	0.00794643	YES		+*			+*		+-				+*
MORF_UNG	MSigDB_C4	4	4.12383	3.36409	0.0171823	0.0130569	YES		+*		+*	+-		+-
Proliferation_Node1640	SignatureDB	4	4.08934	1.48051	0.00710824	0.0135701	YES	+*	+*			+*		+*
BOYAULT_LIVER_CANCER_SUBCLASS_G1_UP	MSigDB_C2	4	4.07514	0.598543	0.000664482	0.000446398	YES				+*/**		++/**	++/**			+*/**
Blood_Module-3.4_Undetermined	SignatureDB	4	4.05949	2.00325	0.00502063	0.00621351	YES		++			++		+*				++
MODULE_32	MSigDB_C4	4	4.05811	5.20524	0.0106628	0.0158463	NO		+*	-*		+*		+-
BYSTRYKH_HEMATOPOIESIS_STEM_CELL_QTL_TRANS	MSigDB_C2	4	4.04963	1.64628	0.00722576	0.0141849	YES	++	++			++		++
Mouse StemCell_Lawlor06_285genes (16651409-SuppTable1)	GeneSigDB	4	4.04959	1.61357	0.00202619	0.00288934	YES		+*			+*		+*			+-
chr16q11	MSigDB_C1	4	4.04798	1.09311	0.0140119	0.0103519	YES		+*	+*			+*	+*
COLDREN_GEFITINIB_RESISTANCE_UP	MSigDB_C2	4	4.04521	0.759402	0.00164129	0.0030878	YES	+*/*+	+*/*+			+*/**		+*/-+
Cell_cycle_Whitfield	SignatureDB	4	4.0438	3.12777	0.00932746	0.0103937	YES		++			++		+*	+-
CHUNG_BLISTER_CYTOTOXICITY_UP	MSigDB_C2	4	4.03841	1.75174	0.0100429	0.0187243	YES	+*/**	+*/+*			++/*+		+-/*+
LI_DCP2_BOUND_MRNA	MSigDB_C2	4	4.02289	2.03335	0.00565201	0.00734585	YES		+*			+*		+-			+-
ICHIBA_GRAFT_VERSUS_HOST_DISEASE_35D_UP	MSigDB_C2	4	4.02209	1.85528	0.00530528	0.00582296	YES	+*/**	+*/**					+*/**				+*/**
Human Ovarian_Manderson02_24genes (11779836-Table2)	GeneSigDB	4	4.0186	0.563972	0.00481076	0.0052438	YES	+*						+*			+*	+*
CHIANG_LIVER_CANCER_SUBCLASS_POLYSOMY7_DN	MSigDB_C2	4	3.97148	1.74018	0.0135321	0.01791	YES		-*/++		**/+*	--/+*						**/+*
MOREAUX_B_LYMPHOCYTE_MATURATION_BY_TACI_DN	MSigDB_C2	4	3.96753	2.36904	0.0101809	0.0121548	YES	**/+*	**/+-			**/+*		-+/+-
MORF_DNMT1	MSigDB_C4	4	3.96635	2.52278	0.0120068	0.0193272	YES		+*			+-		+-			+-
REACTOME_SYNTHESIS_OF_DNA	MSigDB_C2	4	3.96171	1.86304	0.0080211	0.0109576	YES		+*			+*		+-			+*
VILIMAS_NOTCH1_TARGETS_UP	MSigDB_C2	4	3.95077	1.59598	0.0163943	0.0217598	YES			+*/**			+*/**			+*/**		++/**
GNF2_FEN1	MSigDB_C4	4	3.93909	2.5923	0.0145829	0.0185959	YES		+*			+-		+*			+*
REACTOME_TRNA_AMINOACYLATION	MSigDB_C2	4	3.93291	1.87794	0.00947853	0.0154946	YES	+*	+*			+*		+*
NIELSEN_MALIGNAT_FIBROUS_HISTIOCYTOMA_DN	MSigDB_C2	4	3.92799	0.940317	0.0136006	0.0180948	YES						*+/+*			*+/+*	*+/+*	**/+*
Human MultipleMyeloma_Gutierrez10_12genes (20054351-Table3)	GeneSigDB	4	3.91897	1.07398	0.010693	0.00707154	YES	+*		+*				+*				+*
BRUINS_UVC_RESPONSE_LATE	MSigDB_C2	4	3.91622	1.84121	0.00383405	0.00642922	YES	++	++			++		+*
Human InVitro_Skotheim05_15genes_UpRegulated (15994931-Table4a)	GeneSigDB	4	3.88373	0.904221	0.00570511	0.00813784	YES	+*	+*			+*		+*
ZHAN_MULTIPLE_MYELOMA_HP_UP	MSigDB_C2	4	3.88125	0.70995	0.0034171	0.00332998	YES		+*/*+	+*/*+			+*/**	+*/*+
Mouse StemCell_Lindmark04_624genes (15474998-tableS1a)	GeneSigDB	4	3.87839	2.12224	0.0125291	0.0232974	YES	++	+*					+*				++
GNF2_MSH6	MSigDB_C4	4	3.86987	2.33595	0.0162331	0.0118943	YES		+*		+*	+*		+*
HIF1alpha_2x_DN	SignatureDB	4	3.86906	0.999669	0.00819278	0.0136744	YES		-+/+*					*+/+*	**/+*		-+/+*
GNF2_LYN	MSigDB_C4	4	3.85142	0.916824	0.00608785	0.00632084	YES	+*					+*	+*				+*
MORF_GMPS	MSigDB_C4	4	3.84691	1.33584	0.00911931	0.0114395	YES	+*			+*			+-				+*
REGULATION_OF_JAK_STAT_CASCADE	MSigDB_C5	4	3.83882	0.423228	0.0180762	0.00945328	YES			+*	+*					+*	+*
Mouse Lung_not_cancer_Cavarra09_43genes (19118092-Table4)	GeneSigDB	4	3.82916	0.940647	0.00976413	0.00997859	YES				+*				+*	+*		+*
DNA_DEPENDENT_ATPASE_ACTIVITY	MSigDB_C5	4	3.82857	1.99248	0.0191773	0.0172494	YES	+*	+*		+*			+*
SESTO_RESPONSE_TO_UV_C7	MSigDB_C2	4	3.82734	1.03301	0.00457432	0.0052484	YES	+*	+*					+*				+*
Human Viral_Stoff-Khalili06_19genes (16410819-Table3)	GeneSigDB	4	3.81985	1.00037	0.0108505	0.0132138	YES					+*	+*		+*			+*
MARIADASON_RESPONSE_TO_BUTYRATE_SULINDAC_4	MSigDB_C2	4	3.81712	0.819318	0.0076415	0.00968054	YES	+*	+*					+*	+*
WUNDER_INFLAMMATORY_RESPONSE_AND_CHOLESTEROL_UP	MSigDB_C2	4	3.8112	1.47168	0.0110879	0.0165369	YES			+*/**				+*/**		+*/**		+*/**
MODULE_124	MSigDB_C4	4	3.80885	1.005	0.00747969	0.0145205	YES					+*	+*	+*			+*
MODULE_457	MSigDB_C4	4	3.80633	1.01163	0.012356	0.0150585	YES		+*			+*		+*	+*
ICHIBA_GRAFT_VERSUS_HOST_DISEASE_D7_UP	MSigDB_C2	4	3.80286	1.25707	0.00836155	0.0140325	YES		+*/**	+*/**				+*/-*				+*/**
GNF2_RFC4	MSigDB_C4	4	3.79205	2.87388	0.0200124	0.0166597	YES		+*			+-		+-			+*
CSR_EARLY_UP.V1_UP	MSigDB_C6	4	3.77846	1.44712	0.00982385	0.0191091	YES	++/**	++/**			+*/**		+*/**
PUJANA_XPRSS_INT_NETWORK	MSigDB_C2	4	3.77198	2.31958	0.0110501	0.0150537	YES		+*			+*		+-			+*
PEART_HDAC_PROLIFERATION_CLUSTER_DN	MSigDB_C2	4	3.7627	1.49814	0.00780928	0.0131113	YES		*+/+*			**/+*		**/+*			*+/+*
STARK_PREFRONTAL_CORTEX_22Q11_DELETION_DN	MSigDB_C2	4	3.76119	2.37167	0.00616795	0.00480498	YES	++/+*	*+/+*			*+/+*		++/+-
Human Prostate_Bjorkman08_209genes (18798265-tableS2)	GeneSigDB	4	3.75952	0.985698	0.00245299	0.00303472	YES		+*			+*		+*			+*
REACTOME_HIV_INFECTION	MSigDB_C2	4	3.75349	1.23649	0.00310146	0.00400686	YES	+*				+*		+-			+*
GILMORE_CORE_NFKB_PATHWAY	MSigDB_C2	4	3.74562	0.647091	0.0135062	0.0117046	YES	+*		+*			+*					++
SENESE_HDAC2_TARGETS_UP	MSigDB_C2	4	3.73648	1.56587	0.012206	0.0219557	YES	+*/*+	+*/*+					+*/*+		+*/*+
ZERBINI_RESPONSE_TO_SULINDAC_UP	MSigDB_C2	4	3.72384	0.829206	0.0183192	0.015738	YES	+*/**	+*/**		+*/**							+*/**
KEGG_AMINOACYL_TRNA_BIOSYNTHESIS	MSigDB_C2	4	3.71923	1.27337	0.00906226	0.0134964	YES	+*	+*			+*		+*
Blimp_proliferation_repressed	SignatureDB	4	3.71888	2.41889	0.0196141	0.0198555	YES		+*					+*		+*	+*
CELLULAR_BIOSYNTHETIC_PROCESS	MSigDB_C5	4	3.70814	1.14084	0.0045545	0.00867244	YES	+*	+*			+*		+*
PID_FANCONI_PATHWAY	MSigDB_C2	4	3.70802	1.16985	0.00679383	0.00877704	YES	+-	+*			+*		+*
YAO_TEMPORAL_RESPONSE_TO_PROGESTERONE_CLUSTER_17	MSigDB_C2	4	3.70604	1.15915	0.00200811	0.00165648	YES	+*	+*			+*		+-
BYSTRYKH_HEMATOPOIESIS_STEM_CELL_QTL_CIS	MSigDB_C2	4	3.69738	1.43875	0.00831588	0.0148745	YES	+*	+*					+*				++
MODULE_392	MSigDB_C4	4	3.69681	1.10831	0.0187439	0.0198017	YES							+*	+*	+*	+*
chr3p12	MSigDB_C1	4	3.68579	0.231584	0.0191661	0.00630209	YES			+*	+*		+*			+*
Blood_Module-3.7_Undetermined	SignatureDB	4	3.68496	2.81484	0.0152593	0.0127533	YES	+*	+-			+-		+-
IIZUKA_LIVER_CANCER_PROGRESSION_G1_G2_DN	MSigDB_C2	4	3.67009	0.315888	0.00417375	0.00327344	YES					**/+*		**/+*	**/+*		**/+*
MITOCHONDRION_ORGANIZATION_AND_BIOGENESIS	MSigDB_C5	4	3.67008	0.68833	0.0026478	0.00269891	YES	+*	+*			+*		+*
PROTEIN_AMINO_ACID_AUTOPHOSPHORYLATION	MSigDB_C5	4	3.66555	0.856575	0.00804959	0.00675276	YES				+*		+*	+*	+*
BLALOCK_ALZHEIMERS_DISEASE_UP	MSigDB_C2	4	3.66295	2.08124	0.00851646	0.0135553	YES	++/++	++/++					++/+*				++/*+
KEGG_AMINO_SUGAR_AND_NUCLEOTIDE_SUGAR_METABOLISM	MSigDB_C2	4	3.65716	1.52057	0.0108317	0.0157331	YES	+*	+*			+*					+*
Human Leukemia_Rigolin10_82genes (20166207-Table6)	GeneSigDB	4	3.65477	1.23213	0.00990716	0.00848867	YES				+*				+*	+*		+*
Human StemCell_Enk06_139genes (16434974-Table1)	GeneSigDB	4	3.65097	1.41909	0.00812614	0.00896329	YES		+*					+*			++	+*
Human Lymphoma_Lecane05_26genes (16357179-Table1)	GeneSigDB	4	3.64922	1.02954	0.00807903	0.0105558	YES	+*	++			++		+*
Human HeadandNeck_Sengupta06_403genes (16912175-SuppTable3a)	GeneSigDB	4	3.63793	2.24146	0.0113755	0.0140454	YES		++			++		++	+*
JIANG_HYPOXIA_CANCER	MSigDB_C2	4	3.63497	0.342972	0.00231757	0.00221092	YES	+*	+*					+*				+*
Tcell_cytokine_induced_IL2_IL7_IL15only	SignatureDB	4	3.63148	0.850585	0.00802766	0.00616749	YES		+*		+*	+*		+*
CLL_unmutated_gt_CLL_mutated	SignatureDB	4	3.62635	1.03209	0.00717461	0.0096325	YES	+*				+*		+*				+*
Human Viral_Cairo08_76genes (19061838-TableS9a)	GeneSigDB	4	3.62536	1.71188	0.0227588	0.026427	YES	+*	+*			+*		+*
Human Lung_Dauer05_137genes (15735721-Table3)	GeneSigDB	4	3.62283	1.23443	0.00905443	0.0136702	YES	+*					+*	++				+*
WAKASUGI_HAVE_ZNF143_BINDING_SITES	MSigDB_C2	4	3.62245	1.88254	0.015571	0.0176933	YES	+*	+*			+*		+-
REACTOME_COPI_MEDIATED_TRANSPORT	MSigDB_C2	4	3.61894	0.833054	0.0161046	0.0130303	YES	+*		+*				+*			+*
V$CETS1P54_01	MSigDB_C3	4	3.61386	1.34993	0.004143	0.00469663	YES	+*		+*		+*		+-
MODULE_3	MSigDB_C4	4	3.61055	1.99336	0.00694209	0.0069025	YES	+*	+*					+*			++
Human Breast_Miller07_52genes (17885619-Table3a)	GeneSigDB	4	3.60592	1.16658	0.0132987	0.0233363	YES	+*	+*					+*		+*
chr4q27	MSigDB_C1	4	3.5989	0.609117	0.019598	0.0224095	YES		+*	+*				+*	+*
KEGG_JAK_STAT_SIGNALING_PATHWAY	MSigDB_C2	4	3.59877	2.044	0.0155465	0.0184082	YES			+*	+*			+*	+*
LIEN_BREAST_CARCINOMA_METAPLASTIC_VS_DUCTAL_UP	MSigDB_C2	4	3.59515	2.07041	0.0134982	0.0111861	YES	+*/**	+*/**						+*/**			+*/**
NUYTTEN_NIPP1_TARGETS_DN	MSigDB_C2	4	3.59438	1.28945	0.00600303	0.0110789	YES	+*/++	++/+*					+*/++				**/+*
Human Ovarian_Baranova06_907genes_SertoliLeydig (17177833-SuppTable1)	GeneSigDB	4	3.58898	2.13539	0.00716432	0.00528006	YES	+*	++					+*		++
AMUNDSON_RESPONSE_TO_ARSENITE	MSigDB_C2	4	3.58658	1.55193	0.0144667	0.0224915	YES	+*	+*					+*		+*
REACTOME_CYTOKINE_SIGNALING_IN_IMMUNE_SYSTEM	MSigDB_C2	4	3.58349	0.859341	0.0034817	0.00395754	YES	+*		+-	+*			+*
BASAKI_YBX1_TARGETS_UP	MSigDB_C2	4	3.57357	1.88337	0.0115594	0.018314	YES	+*/*+	+*/*+					+*/++	+*/*+
Human Lung_Fontemaggi02_85genes (12213815-Table1)	GeneSigDB	4	3.57014	0.836592	0.0040275	0.00548431	YES	+*	++					+*				++
Human Lung_Baras09_50genes_SCCvsBSM (19525979-SuppTable2)	GeneSigDB	4	3.56836	1.1122	0.0144991	0.0188794	YES	+*			+*					+*		+*
PROTEIN_AUTOPROCESSING	MSigDB_C5	4	3.56765	0.86871	0.00948016	0.00821034	YES				+*		+*	+*	+*
Human Viral_Harenberg08_60genes (18691624-Table1)	GeneSigDB	4	3.55562	1.32774	0.0112765	0.0157747	YES	+-	+-				+*	+*
Human Sarcoma_Xie03_8genes (14576825-Table1)	GeneSigDB	4	3.55537	0.732648	0.0234932	0.00985099	YES		+*				+*		+*	+*
Blood_Module-3.6_Undetermined	SignatureDB	4	3.54176	1.24294	0.00555832	0.00789704	YES	+*	+*	+-				+*
GNF2_TNFSF10	MSigDB_C4	4	3.53225	0.546709	0.00655619	0.00660382	YES	+*	+*					+*	+*
LASTOWSKA_NEUROBLASTOMA_COPY_NUMBER_UP	MSigDB_C2	4	3.52973	1.79983	0.0148523	0.0176612	YES	+-/+*				+*/+*		+*/+-			+-/+*
REACTOME_CD28_CO_STIMULATION	MSigDB_C2	4	3.52747	1.27788	0.0136974	0.0160029	YES		+*	+*				+*			+*
ABRAMSON_INTERACT_WITH_AIRE	MSigDB_C2	4	3.52528	1.33188	0.0123043	0.00975219	YES		+*					+*			+*	+*
LTE2_UP.V1_DN	MSigDB_C6	4	3.52122	1.06815	0.00528522	0.00785316	YES		++/+*		+*/+*		++/++	*+/+*
MACROMOLECULE_BIOSYNTHETIC_PROCESS	MSigDB_C5	4	3.51548	1.13407	0.00911995	0.0175867	YES		+-			+-	+*	+-
ZHU_CMV_24_HR_UP	MSigDB_C2	4	3.51414	1.59319	0.00947967	0.0126127	YES	+*/*+	+*/*+			+*/*+		+*/*+
Human Lung_not_cancer_Lockstone10_123genes (20194811-SuppTable1)	GeneSigDB	4	3.50858	1.28374	0.016006	0.0225409	YES						+*	+*		+*		+*
GRAESSMANN_APOPTOSIS_BY_DOXORUBICIN_UP	MSigDB_C2	4	3.50431	0.755974	0.00201307	0.00229805	YES	+*/++	++/++	+*/++				+*/++
WORSCHECH_TUMOR_REJECTION_UP	MSigDB_C2	4	3.48826	1.16737	0.0127979	0.019736	YES		+*/**	+*/**				+*/**				+*/**
MORF_SS18	MSigDB_C4	4	3.48568	1.13278	0.011795	0.0202546	YES	+*	+*			+*		+-
JAIN_NFKB_SIGNALING	MSigDB_C2	4	3.48381	0.962268	0.00849704	0.00974606	YES	+-				+*		+-				+*
PRAMOONJAGO_SOX4_TARGETS_DN	MSigDB_C2	4	3.47813	0.952617	0.00939764	0.016324	YES	**/+*				*+/+*		**/+*			*+/+*
ZHAN_MULTIPLE_MYELOMA_UP	MSigDB_C2	4	3.46483	0.683382	0.00567675	0.00390847	YES		+*/*+					+*/**			+*/*+	+*/**
MORF_UBE2N	MSigDB_C4	4	3.45442	2.35455	0.0228159	0.0165612	YES	+*	+*					+-				+*
BAKER_HEMATOPOESIS_STAT1_TARGETS	MSigDB_C2	4	3.45376	0.755223	0.0248178	0.00998701	YES							+*	+*	+*		+*
HU_GENOTOXIC_DAMAGE_24HR	MSigDB_C2	4	3.45248	0.846775	0.0115287	0.0145692	YES	+*	+*					+*		+*
chr3p22	MSigDB_C1	4	3.45138	1.40665	0.0132131	0.0140735	YES	+-			+*	+*	+*
BENPORATH_ES_2	MSigDB_C2	4	3.44977	1.03145	0.015785	0.0173042	YES		+*	+*						+*		+*
Human Lymphoma_MontesMoreno08_31genes (17898315-Table1)	GeneSigDB	4	3.44907	0.530629	0.01133	0.0074363	YES		+*					+*		+*		++
RIBONUCLEOPROTEIN_BINDING	MSigDB_C5	4	3.44822	0.441625	0.0115122	0.00841227	YES	+*				+*		+*				+*
MIPS_CDC5L_COMPLEX	MSigDB_C2	4	3.44126	0.743691	0.0093535	0.00631612	YES		+*					+*	+*		+*
KEGG_B_CELL_RECEPTOR_SIGNALING_PATHWAY	MSigDB_C2	4	3.43961	1.06216	0.00730872	0.0056495	YES	+*					+*	+*			+*
GINESTIER_BREAST_CANCER_20Q13_AMPLIFICATION_DN	MSigDB_C2	4	3.4366	1.53863	0.00908943	0.0113472	YES	**/+*				**/+*		*+/+-			**/+*
Human Pancreas_Qian05_94genes (15958547-SuppTable3)	GeneSigDB	4	3.43579	0.57546	0.00346911	0.00479161	YES	+*	+*			+*		+*
Mouse DendriticCells_Bar-On10_9genes (20679228-TableS6)	GeneSigDB	4	3.4286	0.872891	0.0222939	0.0105783	YES		+*	+*				+*				+*
STEIN_ESRRA_TARGETS_RESPONSIVE_TO_ESTROGEN_DN	MSigDB_C2	4	3.42406	1.41121	0.0181075	0.0199962	YES		**/+*					+*/+*			**/+*	**/+*
CLL_mutated_gt_CLL_unmutated	SignatureDB	4	3.42131	1.10383	0.0237034	0.0238845	YES		+*		+*			+*				+*
BASAKI_YBX1_TARGETS_DN	MSigDB_C2	4	3.40599	1.17422	0.00944993	0.0121331	YES				**/++		**/++	+*/++		**/++
Mouse Lymphoma_Hu04_40genes (15120960-Table3)	GeneSigDB	4	3.39643	1.05017	0.013162	0.0135618	YES	+*	+*					+*		+*
Human Breast_Reyal08_41genes (19014521-TableS6a)	GeneSigDB	4	3.39523	1.55464	0.0179582	0.0181507	YES		+*			+*		+*	+*
NUCLEASE_ACTIVITY	MSigDB_C5	4	3.38453	0.586692	0.00412526	0.00402386	YES	+*	+*			+-		+*
Human Lymphoma_Kari03_135genes (12782714-Figure2)	GeneSigDB	4	3.38279	1.30136	0.00972516	0.0101507	YES		++					+*	+*			++
KUROZUMI_RESPONSE_TO_ONCOCYTIC_VIRUS	MSigDB_C2	4	3.38079	0.623083	0.00901477	0.00477083	YES			+*				+*	+*			+*
MIPS_BRM_SIN3A_HDAC_COMPLEX	MSigDB_C2	4	3.3765	0.512601	0.0145221	0.00991935	YES	+*	+*		+*	+*
GNF2_S100A4	MSigDB_C4	4	3.37361	1.24966	0.0128034	0.0107698	YES	+-	+*	+*				+*
Human Brain_Lu06_1128genes (16424041-SuppTable1)	GeneSigDB	4	3.36762	1.55465	0.0124194	0.0182254	YES	+*	+*					+*				+*
KEGG_CYSTEINE_AND_METHIONINE_METABOLISM	MSigDB_C2	4	3.36445	0.678723	0.00955074	0.0100387	YES	+*	+*								+*	+*
FLECHNER_BIOPSY_KIDNEY_TRANSPLANT_REJECTED_VS_OK_DN	MSigDB_C2	4	3.36423	1.19564	0.0102793	0.0184071	YES	+*/++	++/++					+*/++				++/++
ELVIDGE_HIF1A_AND_HIF2A_TARGETS_UP	MSigDB_C2	4	3.3621	0.855856	0.012006	0.0165975	YES		+*/*+					+*/*+			++/-+	+*/*+
Human Esophagus_Hu05_33genes (15805246-Table3)	GeneSigDB	4	3.34241	0.949496	0.0133577	0.0103143	YES		+*		+*	+*					+*
Human Viral_Ciccaglione08_102genes (18590516-TableS1)	GeneSigDB	4	3.34063	0.716333	0.00521589	0.00503589	YES	+*	+*					+*				++
Blimp_Bcell_repressed	SignatureDB	4	3.33722	0.89152	0.012488	0.0188165	YES						++	++			+*	++
ER_GOLGI_INTERMEDIATE_COMPARTMENT	MSigDB_C5	4	3.33697	0.67751	0.00780079	0.00846131	YES	+*	+*			+*		+*
DITTMER_PTHLH_TARGETS_UP	MSigDB_C2	4	3.33412	1.11277	0.00879785	0.0110911	YES	+*/+*				++/++		+*/+*			++/**
BENPORATH_NANOG_TARGETS	MSigDB_C2	4	3.33288	1.91436	0.0132338	0.0148259	YES	++	++			++		++
Human Leukemia_Li07_12genes_DNA_RNAProteinSynthesis (17313671-SuppTable1f)	GeneSigDB	4	3.32865	0.567231	0.0179142	0.00332208	YES			+*		+*		+*				+*
Human Intestine_Vecchi07_1024genes (17297478-SuppTable5)	GeneSigDB	4	3.31678	1.41146	0.0123995	0.0190837	YES		+*		+*			++		+*
GEORGANTAS_HSC_MARKERS	MSigDB_C2	4	3.31677	0.575502	0.00700938	0.00971747	YES		+*					++	+*		++
Human StemCell_Moreno05_21genes (16288009-Table3)	GeneSigDB	4	3.31624	0.906497	0.0173662	0.0105456	YES							+*	++		+*	+*
ZHU_CMV_8_HR_UP	MSigDB_C2	4	3.31319	0.547216	0.0070981	0.00525224	YES	+*/*+	+*/*+					+*/*+				+*/+*
GLUCOSAMINE_METABOLIC_PROCESS	MSigDB_C5	4	3.30982	0.354399	0.0209875	0.0117565	YES	+*	+*		+*					+*
chr3p25	MSigDB_C1	4	3.30721	0.469654	0.00403243	0.00314374	YES	+*	+*				+*	+*
CHOI_ATL_CHRONIC_VS_ACUTE_DN	MSigDB_C2	4	3.30363	0.549379	0.0203461	0.0219521	YES	+*					+*	+*				+*
Human Leukemia_Chiaretti10_38genes (20418243-SuppTable1b)	GeneSigDB	4	3.30062	1.00052	0.0113491	0.0105556	YES		++			+*		+*			+*
ALCALAY_AML_BY_NPM1_LOCALIZATION_DN	MSigDB_C2	4	3.29968	0.919427	0.00747471	0.00941504	YES		*+/++					*+/+*	**/+*		*+/++
Human Kidney_Yamakazi03_68genes (12584564-Table1)	GeneSigDB	4	3.29575	0.775405	0.0111213	0.0126984	YES	+*					+*	+*		+*
Myeloma_PR_subgroup_UP	SignatureDB	4	3.29425	1.20482	0.0188447	0.0208354	YES		+*/*+					+*/*+	+*/**		+*/*+
Human Breast_Ma07_28genes_recurrence (17404081-Table1)	GeneSigDB	4	3.29338	0.848698	0.0161672	0.0219545	YES		+*	+*		+*		+*
ANTIGEN_BINDING	MSigDB_C5	4	3.2869	0.874624	0.0159485	0.0122206	YES		+*	+*				+*			+*
Human Lung_Dracheva07_24genes (17161497-Table3)	GeneSigDB	4	3.27556	1.25382	0.0227848	0.0213498	YES		+*	+*				+*			+*
Human Breast_Creighton09_92genes (18425577-TableS3c)	GeneSigDB	4	3.27365	1.67481	0.0207411	0.0160778	YES		+*	+*				+*	+*
PID_MYC_ACTIVPATHWAY	MSigDB_C2	4	3.26217	0.958829	0.013091	0.0159124	YES					+*		+-			+*	+*
V$ELK1_02	MSigDB_C3	4	3.25865	0.557886	0.00461796	0.00778302	YES	+*				+*		+-			+*
WIERENGA_STAT5A_TARGETS_GROUP2	MSigDB_C2	4	3.2563	1.06357	0.0144805	0.0144721	YES		+*						+*		++	+*
chr15q26	MSigDB_C1	4	3.24498	0.47361	0.00814253	0.00603401	YES		+*		+*			+*		+*
REACTOME_ORC1_REMOVAL_FROM_CHROMATIN	MSigDB_C2	4	3.24432	1.38899	0.0187161	0.0232585	YES		+*			+-		+-			+*
Human Pancreas_Nakamura07_1222genes (17699763-SuppTable1)	GeneSigDB	4	3.24213	1.58425	0.0117419	0.0169494	YES	++	++		+*			++
KRISHNAN_FURIN_TARGETS_DN	MSigDB_C2	4	3.2393	0.467389	0.0282167	0.0137951	YES	+*/+*			**/+*				**/+*	**/+*
Mouse StemCell_Parker05_27genes (15992799-table2)	GeneSigDB	4	3.23715	0.688597	0.013502	0.0153632	YES	+*	+*			+*		+*
KEGG_FRUCTOSE_AND_MANNOSE_METABOLISM	MSigDB_C2	4	3.22802	0.707807	0.0154239	0.019987	YES	+*		+*		+*				+*
REACTOME_IL_2_SIGNALING	MSigDB_C2	4	3.22133	0.530369	0.0106381	0.00934882	YES		+*	+*				+*	+*
Human Breast_Crawford08_971genes (18427120-DataS4)	GeneSigDB	4	3.22103	2.56595	0.028368	0.0203779	YES		+*			+*		+*			+*
LIAN_LIPA_TARGETS_6M	MSigDB_C2	4	3.21587	0.643405	0.0100857	0.00900597	YES		+*	+*				+*				+*
XU_RESPONSE_TO_TRETINOIN_AND_NSC682994_DN	MSigDB_C2	4	3.21572	0.50451	0.0195119	0.0168313	YES					*+/+*		+*/+*			*+/+*	*+/+*
Human Leukemia_Vallat03_36genes (12586635-Figure1bb)	GeneSigDB	4	3.2089	0.454562	0.0114352	0.0103886	YES	+*	+*					+*				+*
FIGUEROA_AML_METHYLATION_CLUSTER_4_DN	MSigDB_C2	4	3.20636	0.549046	0.0233474	0.0123475	YES			*+/+*		*+/+*	*+/+*				**/+*
Myeloma_CD-1_subgroup_DN	SignatureDB	4	3.20406	1.37808	0.0210282	0.0231945	YES					*+/+*	**/+*	**/+*			**/+*
MODULE_337	MSigDB_C4	4	3.19901	1.12296	0.0137254	0.0190625	YES		+*			+*		+*			+*
KOINUMA_TARGETS_OF_SMAD2_OR_SMAD3	MSigDB_C2	4	3.19665	1.67658	0.0138526	0.0146937	YES	++	++					++				++
REACTOME_METABOLISM_OF_PORPHYRINS	MSigDB_C2	4	3.18979	0.418711	0.0204259	0.0112296	YES	+*	+*							+*	+*
MORF_RAB1A	MSigDB_C4	4	3.18946	0.8982	0.00676372	0.00717545	YES	+*				++		+-			+*
Dendritic_cell_CD16pos_blood	SignatureDB	4	3.18152	0.876402	0.0182874	0.0210417	YES	+*	+*					+*				+*
Human Lymphoma_Ando03_15genes (14556665-Table1)	GeneSigDB	4	3.17922	0.468149	0.0244284	0.0151117	YES	+*	+*			+*					+*
MODULE_263	MSigDB_C4	4	3.17875	0.941335	0.0136456	0.0143318	YES	+*	+*					+*	+*
Human Breast_Desmedt08_14genes_VEGF_Module (18698033-tableS1-VEGF)	GeneSigDB	4	3.17301	0.364345	0.0276245	0.0066372	YES			+*				+*		+*		+*
PUJANA_BRCA_CENTERED_NETWORK	MSigDB_C2	4	3.17145	1.3829	0.0132052	0.0136451	YES		+*			+*		+-			+*
KIM_WT1_TARGETS_DN	MSigDB_C2	4	3.17036	0.984361	0.0108985	0.0186453	YES					++/++		*+/+*			*+/++	++/+*
Mouse Pancreas_Thakur08_17genes (18218118-Table4)	GeneSigDB	4	3.17002	0.524875	0.0303066	0.00845103	YES			+*	+*			+*	+*
MORF_CASP10	MSigDB_C4	4	3.16627	1.39618	0.0145449	0.0132005	YES	+*			+*	+*	+*
BIOCARTA_CASPASE_PATHWAY	MSigDB_C2	4	3.15538	0.748976	0.0165156	0.019097	YES		+*			+*		+*		+*
MAHAJAN_RESPONSE_TO_IL1A_UP	MSigDB_C2	4	3.15146	0.693128	0.0101501	0.00727989	YES				+*/**		+*/**	+*/*+				+*/**
KEGG_BIOSYNTHESIS_OF_UNSATURATED_FATTY_ACIDS	MSigDB_C2	4	3.15101	0.650922	0.015787	0.0159665	YES	++	++	+*		+*
Cell_cycle_Cho	SignatureDB	4	3.14379	1.67744	0.0165616	0.0216529	YES	++				++		++			++
Human Lymphoma_Armstrong02_100genes_OverExpressed (11731795-SuppTable2)	GeneSigDB	4	3.14177	0.53412	0.00906319	0.0109107	YES	+*	++		+*			+*
Human Thyroid_Siraj07_30genes (17703498-Table1)	GeneSigDB	4	3.13921	0.462807	0.0119695	0.00723141	YES	+*	+*					+*		+*
LIGASE_ACTIVITY_FORMING_CARBON_OXYGEN_BONDS	MSigDB_C5	4	3.13734	0.667917	0.0172876	0.0116642	YES		+*			+*		+*			+*
Human Breast_Modlich04_24genes (15475428-Table5)	GeneSigDB	4	3.13676	0.600452	0.0231147	0.0207961	YES		+*					+*		+*	+*
Human Leukemia_Hamamura07_17genes (17895889-Table1b)	GeneSigDB	4	3.13655	1.17962	0.0345048	0.0208865	YES		+*							+*	+*	+*
NAKAYAMA_SOFT_TISSUE_TUMORS_PCA1_UP	MSigDB_C2	4	3.13598	0.888122	0.010641	0.00809847	YES	+*/*+	++/**					++/-+	+*/**
Human LungNotCaner_Kent08 (18358739-Table2)	GeneSigDB	4	3.13299	0.517672	0.0273032	0.0223819	YES	+*	+*		+*							+*
SANA_RESPONSE_TO_IFNG_DN	MSigDB_C2	4	3.13217	1.6604	0.0201154	0.0197307	YES	+*/+*	**/+*			**/+*		+*/+*
Mouse StemCell_Kolbus03_22genes (12869505-Table2)	GeneSigDB	4	3.11599	0.330003	0.0241011	0.0121847	YES		+*					+*		+*		+*
BLUM_RESPONSE_TO_SALIRASIB_DN	MSigDB_C2	4	3.11091	4.43961	0.00937366	0.0108817	NO		+*/++				**/-*	+-/+*			*+/+*
Mouse StemCell_Biswas06_31genes (16269622-Table2)	GeneSigDB	4	3.1102	1.08638	0.0204937	0.019001	YES	+*			+*			+*			+*
Myeloma_LB_subgroup_UP	SignatureDB	4	3.10953	0.26374	0.0165322	0.00561784	YES			+*/**	+*/**				+*/**			+*/**
BRACHAT_RESPONSE_TO_CAMPTOTHECIN_DN	MSigDB_C2	4	3.10017	1.06121	0.0232275	0.021178	YES		*+/+*					**/+*	**/+*			**/+*
Human Lymphoma_Martinez-Climent03_431genes (12406872-Table4)	GeneSigDB	4	3.09404	1.64375	0.0159217	0.0138247	YES	++	++					+*			++
Human Leukemia_Achiron07_55genes (17804543-Table2)	GeneSigDB	4	3.06837	1.03032	0.0170084	0.0136027	YES	+*				+*	+*					+*
Human Breast_Yu08_73genes_W2GeneList_outcome (18231641-W2GeneList)	GeneSigDB	4	3.06513	0.769548	0.0201187	0.0201389	YES							+*		+*	+*	+*
TBK1.DF_DN	MSigDB_C6	4	3.0609	1.03002	0.0143861	0.0188578	YES		++/++					++/+*	**/+*	**/++
Human Colon_Kim04_285genes (15208663-SuppTable1a)	GeneSigDB	4	3.05287	0.948262	0.0113576	0.0121959	YES	++	++					+*				+*
GENTILE_UV_RESPONSE_CLUSTER_D6	MSigDB_C2	4	3.04591	0.468002	0.0119469	0.00319315	YES		++		+*		+*	++
INTRACELLULAR_PROTEIN_TRANSPORT	MSigDB_C5	4	3.04585	0.874545	0.0136567	0.0187739	YES	+*		+*		+*		+*
PID_ATR_PATHWAY	MSigDB_C2	4	3.04565	0.589125	0.0106542	0.0104041	YES	+*	+*			+*		+*
NEGATIVE_REGULATION_OF_TRANSCRIPTION_FROM_RNA_POLYMERASE_II_PROMOTER	MSigDB_C5	4	3.04311	0.495718	0.0101193	0.00962322	YES					+*	+*	+*		+*
Human StemCell_Duhagon10_60genes (20500816-Table1)	GeneSigDB	4	3.04076	0.650023	0.011794	0.012927	YES	+*	+*					++				+*
REACTOME_SIGNALING_BY_ILS	MSigDB_C2	4	3.04011	0.995913	0.0123966	0.0157683	YES	+*	+*	+*				+*
Human StemCell_Shaughnessy05_51genes (16188652-table1a)	GeneSigDB	4	3.03226	1.08766	0.0162141	0.0147966	YES	+*	+*			+*		+*
ESTABLISHMENT_OF_PROTEIN_LOCALIZATION	MSigDB_C5	4	3.03199	0.964098	0.0132514	0.0147264	YES	+*		+*		+*		+*
Rat Heart_Lara-Pezzi09_1421genes (20559987-TableS1)	GeneSigDB	4	3.02771	1.26503	0.0144597	0.0186697	YES	++	++			++		++
Human Colon_Ivanov07_10genes (17086209-Table1b)	GeneSigDB	4	3.02526	0.774775	0.0352951	0.0145605	YES	+*	+*		+*						+*
Human Breast_Vecchi08_792genes (17952122-GeneList)	GeneSigDB	4	3.01925	1.06502	0.0155725	0.0176485	YES						++	++		++		++
GNF2_JAK1	MSigDB_C4	4	3.01644	0.651977	0.0223307	0.0113731	YES			+*	+*			+*				+*
GTTTGTT,MIR-495	MSigDB_C3	4	3.00926	1.22827	0.0166211	0.0222497	YES	+*	++	+*				+*
PHONG_TNF_RESPONSE_NOT_VIA_P38	MSigDB_C2	4	3.00915	0.761963	0.0113853	0.0199614	YES	++	++	++				++
REACTOME_TRAF6_MEDIATED_IRF7_ACTIVATION_IN_TLR7_8_OR_9_SIGNALING	MSigDB_C2	4	3.00343	0.561782	0.0277895	0.0179832	YES	+*	+*				+*	+*
Human Prostate_Shepherd08_50genes_2 (18398820-table2)	GeneSigDB	4	2.9984	0.929444	0.0231442	0.0200498	YES		+*				+*			+*		+*
WHITFIELD_CELL_CYCLE_G1_S	MSigDB_C2	4	2.99522	0.872116	0.0103653	0.0106788	YES	+*	+*			+*		+*
BILD_E2F3_ONCOGENIC_SIGNATURE	MSigDB_C2	4	2.99476	1.2649	0.0192664	0.0143567	YES				+*			++		+*		+*
Human Pancreas_Cui07_63genes (17409444-Table1)	GeneSigDB	4	2.99007	0.783163	0.02145	0.0197314	YES	+*	+*	+*	+*
Human Breast_Rodningen08_18genes (17963910-Table2)	GeneSigDB	4	2.98397	0.63906	0.0187	0.0154549	YES	+*	++			++		+*
PICCALUGA_ANGIOIMMUNOBLASTIC_LYMPHOMA_DN	MSigDB_C2	4	2.97977	0.704149	0.0118203	0.0103599	YES			*+/+*			-+/+*	*+/++				**/++
PROTEIN_RNA_COMPLEX_ASSEMBLY	MSigDB_C5	4	2.96747	0.791406	0.0122261	0.0130016	YES	+*	+*			+*		+-
GRAHAM_CML_DIVIDING_VS_NORMAL_QUIESCENT_DN	MSigDB_C2	4	2.96162	0.768565	0.0182682	0.0215708	YES		+*/++		*-/+*				+*/+*			+*/++
Human Uterine_Vanharanta05_107genes (15940248-SuppTable2)	GeneSigDB	4	2.96151	0.726731	0.0146002	0.0110457	YES	++		+*				+*				+*
GNF2_ICAM3	MSigDB_C4	4	2.96116	0.792227	0.0254608	0.02287	YES		+*	+*				+*				+*
KOYAMA_SEMA3B_TARGETS_UP	MSigDB_C2	4	2.96069	0.711035	0.0146899	0.0211859	YES			+*/*+	++/**					+*/*+		++/*+
Human Leukemia_Wilson06_50genes_SigDifferentialClusterA (16597596-TableS2-1)	GeneSigDB	4	2.95357	0.552806	0.0140043	0.0102245	YES	+*	+*		+*			+*
Human Lung_Dauer05_50genes_OverExpressed (15735721-Table1)	GeneSigDB	4	2.9475	0.849855	0.0182585	0.0156308	YES	+*			+*		++	++
Human Prostate_Chambers09_196genes (19489030-SuppTable4)	GeneSigDB	4	2.94737	0.749206	0.0166221	0.0177234	YES				+*			++	+*			+*
REACTOME_SYNTHESIS_OF_PC	MSigDB_C2	4	2.94668	0.368116	0.0283664	0.0135027	YES					+*	+*		+*			+*
POSITIVE_REGULATION_OF_MAP_KINASE_ACTIVITY	MSigDB_C5	4	2.93794	0.9832	0.0225137	0.0185562	YES	+*	+*		+*				+*
BOSCO_INTERFERON_INDUCED_ANTIVIRAL_MODULE	MSigDB_C2	4	2.93629	0.557479	0.0133621	0.0134206	YES	+*	+-		+*			+*
KAAB_HEART_ATRIUM_VS_VENTRICLE_DN	MSigDB_C2	4	2.93294	1.41048	0.0241037	0.0272143	YES	*+/++	*+/+*			*+/+*		*+/+*
MORF_MSH3	MSigDB_C4	4	2.93103	1.0515	0.0129448	0.016128	YES	+*	+*			+-	+*
Human Ovarian_Mok09_389Genes (19962670-TableS3)	GeneSigDB	4	2.92955	0.837516	0.0102737	0.00911775	YES	+*	++		+*			+*
Human Leukemia_Krige08_29genes (18701491-Table2)	GeneSigDB	4	2.92945	0.638144	0.019512	0.014135	YES	+*	+*					+*		+*
DAVIES_MULTIPLE_MYELOMA_VS_MGUS_DN	MSigDB_C2	4	2.92544	0.37591	0.0193425	0.0061201	YES	**/+*		**/++				**/+*				**/++
Human Leukemia_Mullighan07_237genes (17597811-SuppTable3)	GeneSigDB	4	2.92507	1.60457	0.0229741	0.0200952	YES		+*			++	++	+*
Human Leukemia_Wilson06_50genes_DifferentialClusterF (16597596-TableS1-6)	GeneSigDB	4	2.92498	0.846823	0.0221244	0.0202662	YES	+*	+*		+*			++
ACEVEDO_NORMAL_TISSUE_ADJACENT_TO_LIVER_TUMOR_DN	MSigDB_C2	4	2.92348	1.02601	0.015616	0.0191101	YES	*+/+*	**/+*					+*/+*				**/+*
JISON_SICKLE_CELL_DISEASE_UP	MSigDB_C2	4	2.92009	0.643496	0.0104476	0.0100578	YES	+*/*+	+*/**		+*/**			+*/+*
AGCATTA,MIR-155	MSigDB_C3	4	2.90352	0.300162	0.0129799	0.00702015	YES			+*	++					++		++
MODULE_97	MSigDB_C4	4	2.90187	0.469638	0.010375	0.00800088	YES			+*		+*	+*	+*
REACTOME_ACTIVATION_OF_NF_KAPPAB_IN_B_CELLS	MSigDB_C2	4	2.89811	0.853432	0.0164842	0.0171224	YES		+*			+*		+-			+*
ZHAN_MULTIPLE_MYELOMA_CD1_VS_CD2_DN	MSigDB_C2	4	2.89535	0.725933	0.0150807	0.0133508	YES	*+/+*	**/++				**/++	*+/+*
AGUIRRE_PANCREATIC_CANCER_COPY_NUMBER_DN	MSigDB_C2	4	2.89458	0.574832	0.0101674	0.014954	YES	+*/+*	**/++				+-/+*	+-/+*
REACTOME_TRANSCRIPTION_COUPLED_NER_TC_NER	MSigDB_C2	4	2.88783	0.863242	0.0174055	0.0170066	YES	+*				+*		+-			+*
Human Lymphoma_Islam02_31genes (11920564-Table5b)	GeneSigDB	4	2.88691	0.533271	0.0229494	0.0167795	YES	+*	+*						+*		+*
MODULE_159	MSigDB_C4	4	2.88575	1.12459	0.018315	0.0183194	YES	+*	+*			+*		+-
MODULE_114	MSigDB_C4	4	2.88113	4.09526	0.00970928	0.0116052	NO	+*				+*	-*	+-
MORF_ESR1	MSigDB_C4	4	2.87991	0.755822	0.0131846	0.0135358	YES	+*				+-	+*			+*
KEGG_FATTY_ACID_METABOLISM	MSigDB_C2	4	2.87923	0.491673	0.0180726	0.0191055	YES	+*	+*					+*				+*
V$CEBP_Q2	MSigDB_C3	4	2.87407	0.765087	0.0144675	0.0182839	YES				+*			++	+*	++
REACTOME_ANTIGEN_PROCESSING_CROSS_PRESENTATION	MSigDB_C2	4	2.87275	1.11752	0.0206428	0.0189508	YES		+*			+*		+*			+*
Human Leukemia_Carlucci09_57genes (19278812-Table1)	GeneSigDB	4	2.86738	0.652945	0.0140467	0.0145891	YES	+-	+-			+-		+*
Human Leukemia_Chng06_33genes (16804116-Table3)	GeneSigDB	4	2.86656	0.635725	0.0241259	0.0169107	YES					++			+*		+*	+*
MMS_MOUSE_LYMPH_HIGH_4HRS_UP	MSigDB_C2	4	2.86358	0.291409	0.0131299	0.010071	YES		+*			++		+*			+*
Mouse Breast_Bacac06_256genes_StromaUp (17183660-TableS1a)	GeneSigDB	4	2.86358	0.90269	0.0176037	0.0141084	YES		+*	++				++				+*
MA_MYELOID_DIFFERENTIATION_UP	MSigDB_C2	4	2.86158	1.37481	0.030562	0.0213151	YES		+*/**			+*/**		+*/**			+*/**
PID_IL12_2PATHWAY	MSigDB_C2	4	2.86156	0.702566	0.0227301	0.0187975	YES			+*	+*			+*		+*
BIOCARTA_MCM_PATHWAY	MSigDB_C2	4	2.86075	0.289337	0.02496	0.0156197	YES		+*					+*			+*	+*
Human StemCell_Ehrchen07_102genes (17018861-TableS1)	GeneSigDB	4	2.85753	0.705381	0.0144484	0.0166559	YES	+*	+*					++				+*
REACTOME_COSTIMULATION_BY_THE_CD28_FAMILY	MSigDB_C2	4	2.85749	0.413581	0.0139219	0.0110806	YES		+*	+*				+*			+*
Human Brain-Glioblastoma multiforme_Zhao09_16genes (19199503-Table1)	GeneSigDB	4	2.85683	0.370039	0.0363711	0.0105927	YES		+*				++			+*		++
BIDUS_METASTASIS_DN	MSigDB_C2	4	2.85119	1.00153	0.0184773	0.0168359	YES	++/++	+*/++	**/+*							*-/+*
RB_P130_DN.V1_DN	MSigDB_C6	4	2.85067	1.11128	0.0223012	0.0155966	YES		**/+*	**/+*	**/+*			**/+*
GGAMTNNNNNTCCY_UNKNOWN	MSigDB_C3	4	2.8503	0.394653	0.00991199	0.00884491	YES	+*				+*		+-	+*
HOLLEMAN_VINCRISTINE_RESISTANCE_ALL_UP	MSigDB_C2	4	2.84835	0.446223	0.0262612	0.0138041	YES		+*/**				+*/**		+*/**			+*/**
Human InVitro_Bild06_348genes (16273092-TableS1c)	GeneSigDB	4	2.8395	0.951208	0.0197455	0.0223451	YES	++		+*						++		++
Mouse Breast_Bacac06_140genes_StromaDown (17183660-TableS1b)	GeneSigDB	4	2.83697	0.72946	0.0150497	0.014304	YES	+*	+*			++			+*
VALK_AML_CLUSTER_15	MSigDB_C2	4	2.83635	0.534388	0.021721	0.0196493	YES	+*	+*					+*		++
Human Bone_Lu07_301genes (17682054-Table1)	GeneSigDB	4	2.83556	0.672767	0.00928916	0.00996922	YES	+*	++			+*		+*
AAAGGGA,MIR-204,MIR-211	MSigDB_C3	4	2.83449	0.556149	0.0088973	0.00812961	YES	+*				++		++	+*
KEGG_ONE_CARBON_POOL_BY_FOLATE	MSigDB_C2	4	2.83323	0.0997199	0.0304338	0.0165631	YES	+*						+*		+*		+*
LOCKWOOD_AMPLIFIED_IN_LUNG_CANCER	MSigDB_C2	4	2.83302	0.836209	0.0116145	0.0123351	YES	+*				+*		+-			+-
PID_ERBB1_RECEPTOR_PROXIMAL_PATHWAY	MSigDB_C2	4	2.81553	0.209168	0.022278	0.0163718	YES		+*	+*				+*		++
Mouse StemCell_Schimmer06_588genes (16484322-SuppTable1)	GeneSigDB	4	2.81541	1.03334	0.0165096	0.0169162	YES	+*	++					+*		+*
RESPONSE_TO_RADIATION	MSigDB_C5	4	2.80488	0.286214	0.015007	0.0105976	YES	+*		+*				+*			+*
Mouse Lung_Rangasamy09_78genes (19286929-SuppTable2g)	GeneSigDB	4	2.80386	0.59374	0.0172124	0.0176664	YES	+*	+*					+*		+*
Human HeadandNeck_Cloos06_103genes (16513838-TableS2)	GeneSigDB	4	2.80242	0.776021	0.0214644	0.0224922	YES		+*	+*				+*				+*
ATGCTGC,MIR-103,MIR-107	MSigDB_C3	4	2.79985	0.424388	0.0103219	0.00841618	YES			+*			++	+*	+*
Human Prostate_Haudenschild04_18genes (15548695-Table2)	GeneSigDB	4	2.79882	0.437336	0.0333167	0.0107125	YES	+*	+*		+*		++
MODULE_335	MSigDB_C4	4	2.79688	0.486953	0.0259014	0.0136016	YES	+*	+*			+*					+*
Human MultipleMyeloma_Gutierrez10_37genes (20054351-TableS2)	GeneSigDB	4	2.79522	0.440716	0.0217759	0.0104494	YES	+*	+*		+*		++
NEMETH_INFLAMMATORY_RESPONSE_LPS_UP	MSigDB_C2	4	2.79335	0.735242	0.0200272	0.019986	YES		+*/**	+*/**				+*/+*	+*/**
BROWNE_HCMV_INFECTION_2HR_DN	MSigDB_C2	4	2.79239	0.531903	0.0203645	0.0159963	YES						*+/++	*+/+*			*+/++	**/+*
CELL_CYCLE_CHECKPOINT_GO_0000075	MSigDB_C5	4	2.79195	0.650279	0.0172241	0.0173749	YES		+*			+*		+*			+*
DARWICHE_PAPILLOMA_RISK_HIGH_VS_LOW_DN	MSigDB_C2	4	2.78901	0.219474	0.0302782	0.00453368	YES			**/+*	**/+*						**/+*	**/+*
CHOW_RASSF1_TARGETS_DN	MSigDB_C2	4	2.78648	0.674959	0.0205365	0.0149705	YES	**/+*	**/+*					+*/+*			**/+*
V$OCT1_B	MSigDB_C3	4	2.78541	0.901305	0.0167763	0.010866	YES		++						+*	++		+*
MIPS_BRM_SIN3A_COMPLEX	MSigDB_C2	4	2.7835	0.505246	0.0306153	0.0158238	YES	+*	+*		+*	+*
V$E2F_01	MSigDB_C3	4	2.78095	0.967281	0.0250418	0.0211206	YES					+*		+*	+*		+*
SENESE_HDAC1_AND_HDAC2_TARGETS_UP	MSigDB_C2	4	2.78054	0.475877	0.0116751	0.00827813	YES		++/*+		+*/*+			++/*+		++/*+
GGAANCGGAANY_UNKNOWN	MSigDB_C3	4	2.77895	0.794082	0.0172275	0.0200201	YES		+*			+*		+-			+*
Human Colon_Graudens06_863genes (16542501-SuppTable3)	GeneSigDB	4	2.77757	0.576631	0.00931739	0.0106408	YES	++	++					++				+*
Human Leukemia_Krivtsov06_50genes (16862118-Figure3)	GeneSigDB	4	2.77522	0.495454	0.0225088	0.0187737	YES	+*	+*					+*				+*
FONTAINE_FOLLICULAR_THYROID_ADENOMA_DN	MSigDB_C2	4	2.7724	0.412781	0.0208358	0.0158866	YES				**/+*			**/+*		**/+*		**/+*
PID_RAS_PATHWAY	MSigDB_C2	4	2.77172	0.495961	0.0214803	0.0164423	YES	+*	+*				+*	+*
Human Lymphoma_Jenner03_44genes_2 (12925741-Figure12)	GeneSigDB	4	2.76079	0.146295	0.0336585	0.00609793	YES			+*	+*					+*		+*
GEORGES_CELL_CYCLE_MIR192_TARGETS	MSigDB_C2	4	2.7538	0.52101	0.0209108	0.017327	YES		+*					+*	+*	+*
Human Leukemia_Haslinger04_109genes (15459216-TableA2a)	GeneSigDB	4	2.75218	0.400761	0.0162902	0.00623302	YES			+*				++	+*	+*
REACTOME_BASE_EXCISION_REPAIR	MSigDB_C2	4	2.74555	0.31508	0.0202673	0.0086757	YES	+*				+*		+*			+*
CCAWNWWNNNGGC_UNKNOWN	MSigDB_C3	4	2.74555	0.406674	0.0116098	0.0088568	YES		+*			+*		+*			+*
chr17q23	MSigDB_C1	4	2.73675	0.26742	0.0136686	0.00747987	YES	+*	+*	+*				+*
YKACATTT_UNKNOWN	MSigDB_C3	4	2.7357	0.736842	0.0198073	0.0191857	YES			++	++				+*	++
RGAGGAARY_V$PU1_Q6	MSigDB_C3	4	2.73171	1.04369	0.0143391	0.00989295	YES	+*	+*					++		+*
GRAHAM_CML_QUIESCENT_VS_NORMAL_QUIESCENT_UP	MSigDB_C2	4	2.7286	0.98709	0.0213296	0.0200033	YES	++/*+	+*/**					+*/*+				+*/*+
SARRIO_EPITHELIAL_MESENCHYMAL_TRANSITION_UP	MSigDB_C2	4	2.72493	4.07908	0.021556	0.0177304	NO		+*/**				-*/*+	+*/*+	+*/**
Mouse Lung_Beisiegel09_262genes (19795415-Table1)	GeneSigDB	4	2.72441	0.696635	0.0169913	0.0185477	YES		+*	+*				+*	+*
Human Liver_Skawran08_551genes (18277965-TableS1b)	GeneSigDB	4	2.72373	0.533656	0.0106832	0.00895304	YES	++	++					++				++
Human StemCell_Fang09_32genes (19454749-Table2)	GeneSigDB	4	2.72171	0.477449	0.0229822	0.0152893	YES	+*	+*					+*				+*
EGFR_UP.V1_UP	MSigDB_C6	4	2.71978	0.837651	0.018296	0.0176969	YES	+*/*+			+*/+*			++/++				++/++
Human Lymphoma_Wouters07_81genes (17671232-TableS2b)	GeneSigDB	4	2.71576	0.418621	0.0235457	0.0213608	YES		+*		+*			+*				++
Human Lung_Johnson07_571genes (17699775-SuppTable2)	GeneSigDB	4	2.71503	0.593496	0.0107751	0.00829008	YES	+*	+*	++				++
UNFOLDED_PROTEIN_BINDING	MSigDB_C5	4	2.7149	0.531135	0.0231209	0.0179927	YES		++			+*		+*				+*
FARMER_BREAST_CANCER_APOCRINE_VS_LUMINAL	MSigDB_C2	4	2.7101	0.261731	0.0105232	0.00827683	YES	+*	+*		++							++
REACTOME_FANCONI_ANEMIA_PATHWAY	MSigDB_C2	4	2.69848	0.390961	0.0218584	0.0142423	YES	+*	+*			+*		+*
MODULE_108	MSigDB_C4	4	2.69185	0.73588	0.0237204	0.0219941	YES	+*	+*					+*	+*
V$YY1_Q6	MSigDB_C3	4	2.69029	0.212768	0.00847356	0.00634741	YES	+*				+*		+*			+*
RPS14_DN.V1_DN	MSigDB_C6	4	2.68924	0.984979	0.017921	0.0158877	YES	**/+*	+*/+*			*+/+*		++/+*
Human Bone Marrow_Zhan03_50genes_lateDiff (12393520-Table3)	GeneSigDB	4	2.68756	0.560853	0.0225202	0.0187233	YES	++	+*					+*				++
Glucose_starve_UP	SignatureDB	4	2.68741	0.904676	0.0310747	0.0212694	YES	+*/*+	+*/*+					+*/+*				+*/*+
Human Leukemia_Heuser05_100genes (16266895-Figure1)	GeneSigDB	4	2.68726	0.193364	0.0205831	0.0113381	YES		++	++				++				++
WHITFIELD_CELL_CYCLE_G2	MSigDB_C2	4	2.68708	0.701941	0.0202556	0.0159732	YES							+*	+*	+*	+*
Mouse Bone_Boylan07_204genes (17483317-TableS4)	GeneSigDB	4	2.68382	0.612533	0.0209183	0.0198336	YES		+*	+*				+*				+*
MORF_FLT1	MSigDB_C4	4	2.68188	0.778073	0.0236584	0.0213058	YES			+*		+-	+*			+*
Mouse Lymphoma_Wu08_1148genes (18535662-TableS2c)	GeneSigDB	4	2.68013	0.241544	0.00759736	0.00419372	YES	++	++	++				++
PID_TCPTP_PATHWAY	MSigDB_C2	4	2.67809	0.60526	0.0241179	0.0138428	YES		+*				+*	+*		+*
MULLIGHAN_NPM1_MUTATED_SIGNATURE_1_DN	MSigDB_C2	4	2.6739	0.356936	0.0148783	0.00864438	YES	+*/+*		**/+*			*+/+*	+*/+*
Mouse Testicular_Cederroth07_63genes (17673513-Table1)	GeneSigDB	4	2.67112	0.494014	0.0321068	0.0168453	YES				+*			++		+*		++
RESPONSE_TO_ABIOTIC_STIMULUS	MSigDB_C5	4	2.67076	0.52462	0.0190652	0.0152535	YES	+*		+*				+*			+*
BROWNE_HCMV_INFECTION_6HR_DN	MSigDB_C2	4	2.66925	0.509544	0.0178569	0.0129081	YES		*+/++						*+/+*	**/++		**/++
Human Breast_Speers09_52genes_IDKinasesOverExpressed (19808870-Table2)	GeneSigDB	4	2.66588	0.514901	0.0176703	0.0140582	YES	+*	+*			+*		+*
Human Lymphoma_VanLoo09_135genes (19797726-SuppTable1a)	GeneSigDB	4	2.66506	1.19141	0.0315314	0.0216843	YES					++	+*	++		++
MITSIADES_RESPONSE_TO_APLIDIN_UP	MSigDB_C2	4	2.6592	1.37279	0.0315795	0.0216763	YES			++/**			++/**	++/+*				++/+*
KEGG_UBIQUITIN_MEDIATED_PROTEOLYSIS	MSigDB_C2	4	2.65913	0.455764	0.0155465	0.0186556	YES	+*	+*					+*			+*
Human Leukemia_Juric07_106genes (17312329-SuppTable4)	GeneSigDB	4	2.65722	0.65278	0.0266143	0.0220477	YES	+*						++	+*	+*
HAHTOLA_MYCOSIS_FUNGOIDES_DN	MSigDB_C2	4	2.6563	0.447365	0.0400332	0.0131238	YES						**/+*	**/+*		**/+*	**/++
ATGTTTC,MIR-494	MSigDB_C3	4	2.65033	0.540416	0.0158284	0.0133828	YES		+*		+*	++		++
RICKMAN_TUMOR_DIFFERENTIATED_WELL_VS_POORLY_UP	MSigDB_C2	4	2.64838	0.934455	0.0188028	0.0141671	YES	++/+*				++/*+		+*/**			+*/*+
PID_VEGFR1_2_PATHWAY	MSigDB_C2	4	2.64654	0.455002	0.0221067	0.0168125	YES	+*					++			+*	++
KRIGE_AMINO_ACID_DEPRIVATION	MSigDB_C2	4	2.63989	0.468568	0.025985	0.0135063	YES	+*	+*					+*		+*
Mouse Leukemia_Ogino07_62genes (17286852-Table2)	GeneSigDB	4	2.63832	0.32615	0.0153922	0.010214	YES	+*	+*			++		+*
GTGACGY_V$E4F1_Q6	MSigDB_C3	4	2.6376	0.749208	0.0160997	0.0211674	YES	+*				+*		+*			+*
V$LEF1_Q6	MSigDB_C3	4	2.62762	0.347082	0.0167496	0.0115478	YES			+*	++				+*	+*
Human StemCell_Cai06_1370genes (16293578-SuppTable2)	GeneSigDB	4	2.62069	0.883628	0.0213223	0.0236365	YES	++			+*		++					++
Mouse Viral_Buonomo11_5307genes (21205295-TableS1)	GeneSigDB	4	2.6202	0.592015	0.0126721	0.0177016	YES		++		++			++		++
CAGGTCC,MIR-492	MSigDB_C3	4	2.61492	0.730007	0.0245457	0.0200589	YES	+*				+*		+*				+*
CHARAFE_BREAST_CANCER_LUMINAL_VS_MESENCHYMAL_UP	MSigDB_C2	4	2.61304	0.475942	0.0148959	0.0153088	YES	++/*+					+*/*+			+*/++	+*/-+
Human Colon_Grade06_58genes (16397240-Table1e)	GeneSigDB	4	2.61116	0.388839	0.0229072	0.00943951	YES	+*					+*	+*				+*
RRCCGTTA_UNKNOWN	MSigDB_C3	4	2.61018	0.473224	0.0181443	0.0186899	YES	+*				+*		+*			+*
Mouse Lung_Rangasamy09_36genes (19286929-SuppTable2d)	GeneSigDB	4	2.60878	0.209555	0.0277867	0.0183841	YES	+*		+*			+*	+*
V$USF_Q6	MSigDB_C3	4	2.6086	0.656491	0.0190968	0.0192652	YES	+*						+*	+-	+*
CTTTGCA,MIR-527	MSigDB_C3	4	2.60796	0.732086	0.0160676	0.0134154	YES	++	++		++	++
CTGTTAC,MIR-194	MSigDB_C3	4	2.60618	0.662461	0.0210769	0.0143919	YES		+*	+*		++		+*
V$ARNT_02	MSigDB_C3	4	2.59052	0.698497	0.0180098	0.0173995	YES	+*				+-		+-	+-
V$CEBPB_02	MSigDB_C3	4	2.58084	0.365914	0.0159915	0.0119277	YES				+*			++	+*	+*
V$STAT_01	MSigDB_C3	4	2.57661	0.503865	0.0193546	0.0203292	YES	+*			+*			+*		+*
PURBEY_TARGETS_OF_CTBP1_AND_SATB1_DN	MSigDB_C2	4	2.57119	0.463213	0.0188093	0.0132274	YES	*+/+*	*+/+*						**/+*			**/+*
ROSS_AML_WITH_AML1_ETO_FUSION	MSigDB_C2	4	2.56881	0.520124	0.0183292	0.0146044	YES	+*	+*			++		+*
V$HNF4_01	MSigDB_C3	4	2.5633	0.489464	0.0203365	0.0182478	YES			+*					+*	+*	+*
Human Embryo_Heim07_327genes (17880687-TableS5)	GeneSigDB	4	2.55359	0.892795	0.026264	0.0235249	YES		++		+*		+*	++
PROTEIN_FOLDING	MSigDB_C5	4	2.5532	0.351818	0.0189949	0.0119039	YES	+*				+*		+*			+*
Human Leukemia_Falt05_50genes_UpRegulatedVH3 (15817677-TableS1b)	GeneSigDB	4	2.55177	0.640169	0.0250076	0.0163814	YES	+*				+*		+*			+*
BROWNE_HCMV_INFECTION_20HR_UP	MSigDB_C2	4	2.54877	0.654341	0.0185774	0.0175577	YES	+*/++	+*/*+					++/*+			+*/*+
Human Breast_Mackay07_1264GenesDownRegulated (17555561-Table1)	GeneSigDB	4	2.54069	0.460021	0.0105281	0.00645403	YES	+*				+*		+*			+-
GEISS_RESPONSE_TO_DSRNA_UP	MSigDB_C2	4	2.53994	0.386255	0.0360828	0.0118848	YES				+*/**			+*/**	+*/**	+*/+*
TGCCTTA,MIR-124A	MSigDB_C3	4	2.53369	0.426428	0.0133811	0.0108593	YES	++	++					++		++
REACTOME_PROCESSING_OF_CAPPED_INTRON_CONTAINING_PRE_MRNA	MSigDB_C2	4	2.53232	3.78145	0.0227557	0.0179085	NO			-*		+-		+-			+-
ABBUD_LIF_SIGNALING_1_UP	MSigDB_C2	4	2.53021	0.517502	0.0264955	0.0140536	YES	+*/**	+*/**		+*/**			+*/**
LOPEZ_TRANSLATION_VIA_FN1_SIGNALING	MSigDB_C2	4	2.52859	0.533519	0.0310043	0.0158614	YES					+*		+*		+*	+*
GGCKCATGS_UNKNOWN	MSigDB_C3	4	2.5226	0.483982	0.0313874	0.0207668	YES	+*		+*				+*		+*
FERRANDO_T_ALL_WITH_MLL_ENL_FUSION_UP	MSigDB_C2	4	2.51949	0.532558	0.0232673	0.01329	YES	+*/+*			+*/**		+*/**	+*/+-
STK33_SKM_UP	MSigDB_C6	4	2.51524	0.636089	0.0217442	0.0162464	YES	+*/+*	++/++		+*/**							+*/++
BIOCARTA_FCER1_PATHWAY	MSigDB_C2	4	2.49079	0.363722	0.0321044	0.0165245	YES		+*					+*		+*	++
YAGI_AML_WITH_11Q23_REARRANGED	MSigDB_C2	4	2.4885	0.374384	0.0154175	0.0115197	YES	++	++					++				++
PUIFFE_INVASION_INHIBITED_BY_ASCITES_DN	MSigDB_C2	4	2.4798	0.352749	0.0191108	0.0147847	YES	**/+*				**/++		+*/+*				**/+*
WEI_MIR34A_TARGETS	MSigDB_C2	4	2.47698	0.720253	0.0226427	0.0170091	YES	+*	+*			+*		++
MOLECULAR_ADAPTOR_ACTIVITY	MSigDB_C5	4	2.46936	0.321136	0.0285295	0.00944602	YES		+*	+*			+*	+*
WINTER_HYPOXIA_DN	MSigDB_C2	4	2.46934	0.466413	0.0359772	0.0156315	YES		**/+*				**/+*		**/+*	**/+*
Mouse Brain_Johansson05_62genes (15750623-SuppTable1a)	GeneSigDB	4	2.46028	0.423131	0.0287478	0.016318	YES	+*	+*	+*				+*
CAGCAGG,MIR-370	MSigDB_C3	4	2.4461	0.499503	0.0246427	0.0224708	YES	+*	+*		+*	+*
TAGCTTT,MIR-9	MSigDB_C3	4	2.44344	0.557592	0.0207933	0.0135853	YES	++			+*		+*	++
REACTOME_CELL_CYCLE_MITOTIC	MSigDB_C2	4	2.43528	3.34287	0.00420236	0.00509868	NO		+*	--				+-			+*
BRUINS_UVC_RESPONSE_EARLY_LATE	MSigDB_C2	4	2.43523	0.492496	0.0234258	0.0215438	YES		+*	+*	+*			+*
Human Breast_Wirapati08_288genes_ESR1_Module (18662380-S3-ESR1)	GeneSigDB	4	2.42728	0.32049	0.0229416	0.0144509	YES				+*		+*			++		+*
PEPTIDYL_AMINO_ACID_MODIFICATION	MSigDB_C5	4	2.42359	0.588556	0.0283338	0.0176634	YES	+*	++					+*			+*
Human Lymphoma_Armstrong02_100genes_UnderExpressed (11731795-SuppTable1)	GeneSigDB	4	2.42169	0.301618	0.0291136	0.0113507	YES	++					+*		+*	++
Mouse Leukemia_Torchia07_928genes (17875932-TableS4)	GeneSigDB	4	2.41053	0.4611	0.0189993	0.0177728	YES	++	++		++		++
MOOTHA_PGC	MSigDB_C2	4	2.40927	3.10434	0.0136252	0.0205257	NO	+*	+*				-*	+-
Thymic_SP_CD4+Tcell_gt_Thymic_DP_Tcell	SignatureDB	4	2.40198	0.405037	0.0299654	0.0144882	YES			+*	++			++				++
LEF1_UP.V1_UP	MSigDB_C6	4	2.39983	0.619672	0.0293665	0.0189131	YES	++/**		++/*+					+*/**	++/*+
ACTGCCT,MIR-34B	MSigDB_C3	4	2.39743	0.392872	0.0232441	0.010522	YES			+*				+*	+*			+*
PID_CASPASE_PATHWAY	MSigDB_C2	4	2.39271	0.432554	0.0293022	0.0130096	YES	++				++		+*		++
Human Lymphoma_Chng09_209genes (18974375-TableS2)	GeneSigDB	4	2.38608	3.4909	0.00134073	0.00160314	NO		++	+*				++			-+
MODULE_239	MSigDB_C4	4	2.38347	0.242763	0.0214379	0.00798459	YES	+*	++	+*				+*
Mouse Lymphoma_Dickinson04_55genes (15120961-Figure6)	GeneSigDB	4	2.37895	0.576968	0.0339506	0.0161634	YES	+*				+*		+*		+*
KOKKINAKIS_METHIONINE_DEPRIVATION_48HR_DN	MSigDB_C2	4	2.37298	0.347614	0.035428	0.0152762	YES		*+/++						**/+*		*+/+*	**/++
RAO_BOUND_BY_SALL4	MSigDB_C2	4	2.36966	0.597001	0.0246885	0.0187406	YES	++	++					++		+*
REGULATION_OF_PROTEIN_KINASE_ACTIVITY	MSigDB_C5	4	2.36172	0.190975	0.023175	0.0130575	YES		++		+*		+*	+*
STK33_UP	MSigDB_C6	4	2.35975	0.317783	0.0214393	0.0102519	YES	+*/+*	++/++							++/**		+*/++
CAGGTG_V$E12_Q6	MSigDB_C3	4	2.35759	0.499527	0.0191405	0.0167462	YES	++		++	++					++
RIGGINS_TAMOXIFEN_RESISTANCE_DN	MSigDB_C2	4	2.34779	0.436991	0.0246057	0.0202776	YES	**/++	**/++		**/++			**/++
GAJATE_RESPONSE_TO_TRABECTEDIN_UP	MSigDB_C2	4	2.33577	0.4773	0.0348921	0.0146949	YES	++/+*			+*/**			++/**	+*/*+
Human Ovarian_Wood03_173genes (12734205-TableS5)	GeneSigDB	4	2.32474	0.444358	0.023434	0.0103886	YES		+*		+*	++		++
Human Prostate_John-Aryankalayil09_2212genes (19139136-TableS3)	GeneSigDB	4	2.32387	0.408699	0.0197071	0.0169966	YES		++	+*	++							+*
REGULATION_OF_KINASE_ACTIVITY	MSigDB_C5	4	2.30052	0.188218	0.0256317	0.0132565	YES		++		+*		+*	+*
REACTOME_LATE_PHASE_OF_HIV_LIFE_CYCLE	MSigDB_C2	4	2.29103	0.369628	0.0272588	0.0180162	YES	+*				+-		+-			+*
Human StemCell_Hao09_359genes (20077526-TableS4)	GeneSigDB	4	2.27751	0.443362	0.0278273	0.0184013	YES	+*			++		++	++
GAUSSMANN_MLL_AF4_FUSION_TARGETS_A_UP	MSigDB_C2	4	2.23122	0.141204	0.0284055	0.00814682	YES	++/**						++/**		++/**		+*/**
REACTOME_M_G1_TRANSITION	MSigDB_C2	4	2.2252	2.86572	0.0179181	0.0217474	NO		+-				-*	+-			+*
V$CEBPA_01	MSigDB_C3	4	2.22115	0.086486	0.0291555	0.00896816	YES				+*			+*	+*	++
Mouse Lung_Rangasamy09_248genes (19286929-SuppTable2i)	GeneSigDB	4	2.22003	0.231309	0.0318925	0.00860901	YES		++	+*	++		++
V$TCF11_01	MSigDB_C3	4	2.21494	0.250609	0.0261975	0.00728732	YES	+*			+*		++	++
Human HeadandNeck_Jarvinen06_502genes (16715129-SuppTable4)	GeneSigDB	4	2.20849	2.80296	0.0102648	0.0170723	NO	+*	++					+*	-*
HAHTOLA_MYCOSIS_FUNGOIDES_SKIN_UP	MSigDB_C2	4	2.20263	0.266442	0.027608	0.0107838	YES	+*/**				++/**		++/+*				++/**
MORF_IL13	MSigDB_C4	4	2.19538	0.214681	0.0263847	0.00956997	YES	+*	+*	+*		+*
PID_P53DOWNSTREAMPATHWAY	MSigDB_C2	4	2.19386	0.313396	0.0368414	0.0131799	YES		+*				+*		+*	+*
REACTOME_GENERIC_TRANSCRIPTION_PATHWAY	MSigDB_C2	4	2.18992	2.77063	0.00738842	0.0122326	NO				-*	+*	+*			+*
TRANSLATION	MSigDB_C5	4	2.14504	2.72802	0.00797261	0.0132574	NO		+*			+-		+-		-*
REACTOME_MITOTIC_M_M_G1_PHASES	MSigDB_C2	4	2.14406	2.82968	0.00744771	0.00951082	NO		+*	--				+-			+-
AAGCACA,MIR-218	MSigDB_C3	4	2.14317	0.427925	0.0339621	0.0168157	YES		++	+*			+*					+*
CTTTGT_V$LEF1_Q2	MSigDB_C3	4	2.09745	0.233647	0.0260884	0.0132923	YES	++			++				+*	++
TGTATGA,MIR-485-3P	MSigDB_C3	4	2.08019	0.226327	0.0400508	0.00734671	YES		++		++			++				++
Mouse Lung_Rangasamy09_254genes (19286929-SuppTable2n)	GeneSigDB	4	2.06744	0.0821335	0.0342166	0.00768077	YES		++	++			++	++
MORF_HDAC1	MSigDB_C4	4	2.0436	3.79613	0.0218676	0.0239876	NO	+*				+*		+-	--
GOZGIT_ESR1_TARGETS_DN	MSigDB_C2	4	2.0172	3.44744	0.00184037	0.00211669	NO				+*/++	*+/-+	*+/++					**/++
JIANG_VHL_TARGETS	MSigDB_C2	4	1.89909	2.74146	0.0224259	0.0228757	NO					+*	-*	+*				+*
LEE_LIVER_CANCER_SURVIVAL_DN	MSigDB_C2	4	1.77306	2.87144	0.0081695	0.00662781	NO		**/+*			**/+*		**/+*	**/-*
Human Leukemia_Walker06_341genes (16705090-TableS2)	GeneSigDB	4	1.76071	2.40949	0.0178814	0.0212791	NO	+*	+*					+*		-*
SOTIRIOU_BREAST_CANCER_GRADE_1_VS_3_UP	MSigDB_C2	4	1.66927	4.94691	0.00998149	0.0143444	NO	-*/**	+-/**				--/**	+-/**
Human Breast_Desmedt08_469genes_ESR1_Module (18698033-tableS1-ESR1)	GeneSigDB	4	1.6621	2.44172	0.0224567	0.0233319	NO		++	+*					-+			++
AAGCACT,MIR-520F	MSigDB_C3	4	1.59532	2.33906	0.0223176	0.0157136	NO				+*		+*				-*	+*
V$E2F1_Q3	MSigDB_C3	4	1.50929	2.49535	0.0236964	0.017058	NO			-*		+*		+*			+*
V$NFKAPPAB65_01	MSigDB_C3	4	1.50048	2.29682	0.0267812	0.0173822	NO			+*	-*			++	+*
Mouse Kidney_Takemoto06_388genes_cat2 (16498405-TableS4)	GeneSigDB	4	1.44888	2.82686	0.0082016	0.0133909	NO	+*						+*	-*		++
GROSS_HYPOXIA_VIA_ELK3_AND_HIF1A_UP	MSigDB_C2	4	1.43832	2.21278	0.0223658	0.0141513	NO		++/**	+*/**				++/+*			-+/*+
Human Ovarian_Wood03_142genes (12734205-TableS4)	GeneSigDB	4	1.38351	2.12636	0.0254496	0.0154035	NO	+*		-*				+*	+*
AACTTT_UNKNOWN	MSigDB_C3	4	1.37842	2.15168	0.0166682	0.0113284	NO			++	++	-+	++
MORF_UBE2I	MSigDB_C4	4	1.35295	4.46019	0.0224532	0.0209521	NO			-*				+-			+-	-*
Monocyte_4x_U133plus	SignatureDB	4	1.31566	2.41318	0.0173339	0.0160989	NO		+*			-+		++				+*
chr1p34	MSigDB_C1	4	1.31153	2.24306	0.0262672	0.0189216	NO	+*				+*			+*		-+
ENK_UV_RESPONSE_KERATINOCYTE_UP	MSigDB_C2	4	1.30456	2.39679	0.0125504	0.0105445	NO	+*/++						+-/+*	-*/**		+*/*+
CHICAS_RB1_TARGETS_CONFLUENT	MSigDB_C2	4	1.25167	2.6961	0.0101641	0.0081317	NO				+*	-+	++					++
Human Brain_Freije04_595genes (15374961-TableS2)	GeneSigDB	4	1.23755	2.28725	0.0170122	0.00560649	NO				+*	-+		++				++
ZWANG_TRANSIENTLY_UP_BY_1ST_EGF_PULSE_ONLY	MSigDB_C2	4	1.12287	1.98843	0.026731	0.00884298	NO			++		-+	++		+*
MODULE_5	MSigDB_C4	4	1.03563	2.10606	0.0273154	0.0108374	NO	+*				-+		++				++
MODULE_76	MSigDB_C4	4	0.59876	2.94359	0.0207305	0.0188156	NO						-+	++	+*		-+
ALONSO_METASTASIS_UP	MSigDB_C2	4	0.594405	2.95802	0.0207366	0.018035	NO		++/**				-*/**	++/++			-+/*+
MODULE_170	MSigDB_C4	4	0.536343	2.88303	0.022216	0.0170839	NO					-+		++	+*		-+
MODULE_128	MSigDB_C4	4	0.493106	2.73006	0.0249504	0.0187425	NO					-+		++	+*		-+
REACTOME_3_UTR_MEDIATED_TRANSLATIONAL_REGULATION	MSigDB_C2	4	0.439489	2.75271	0.0221005	0.0145959	NO	-*				+-		+-			-*
MODULE_79	MSigDB_C4	4	0.421776	2.69999	0.0236561	0.0165124	NO					-+		++	+*		-+
Human Embryo_Heim07_1515genes (17880687-TableS3)	GeneSigDB	4	0.146948	3.13654	0.00655949	0.0056226	NO	++			+*	-+					-+
Human Immune_Allen10_162genes (20220088-SuppTable2)	GeneSigDB	4	0.145978	2.46152	0.0334217	0.0127908	NO			+*	+*	-+					-+
MIPS_RIBOSOME_CYTOPLASMIC	MSigDB_C2	4	0.089224	2.7419	0.0168079	0.018109	NO	-*				+-		+-			-*
Human Breast_Troester06_364genes_up_DOX-MCF7 (17150101-TableS1h)	GeneSigDB	4	0.0475809	5.16392	0.00502623	0.00578943	NO	-+		-*			-*	+*
TGCGCANK_UNKNOWN	MSigDB_C3	4	0.0218313	2.57616	0.0171392	0.0121972	NO			-*		+*		+*				-*
KRAS.600.LUNG.BREAST_UP.V1_UP	MSigDB_C6	4	-0.010487	2.59368	0.026834	0.0172357	NO	-*/**		+*/*+		-*/-*						+*/**
MODULE_64	MSigDB_C4	4	-0.372774	2.77573	0.0238913	0.0201218	NO					-*			+*	+*	-+
ZHOU_INFLAMMATORY_RESPONSE_FIMA_UP	MSigDB_C2	4	-1.05376	2.03525	0.0256549	0.0125012	NO				+*/**	-+/*+		-+/**			-+/**
chrxq28	MSigDB_C1	4	-1.20107	2.33921	0.0161637	0.0145817	NO	-*				-*			+*		-*
MEMBRANE	MSigDB_C5	4	-1.52526	2.45904	0.0206776	0.0171235	NO				+*	-+		-+			-*
Human Leukemia_Pellegrini08_2692genes (18801183-SuppTable1)	GeneSigDB	4	-1.85113	2.97865	0.00799007	0.00709823	NO			++		-+		-+			-+
MODULE_248	MSigDB_C4	4	-1.90084	0.10372	0.0322106	0.00876214	YES		-+			-+	-+				-+
Human Breast_Blick10_57genes_CD24_BasalB (20521089-Table3)	GeneSigDB	4	-1.90258	0.128324	0.0333701	0.0114175	YES		-*			-*		-+			-*
KANG_IMMORTALIZED_BY_TERT_DN	MSigDB_C2	4	-1.90427	0.128191	0.0319754	0.0110162	YES	**/-+	*+/-+					*+/-+			**/-*
WESTON_VEGFA_TARGETS_6HR	MSigDB_C2	4	-1.91349	0.129257	0.0327134	0.0113195	YES		-+			-+		-+			-+
MODULE_433	MSigDB_C4	4	-1.95936	0.165697	0.0293802	0.0124736	YES		-*			-*		-+			-*
V$FREAC3_01	MSigDB_C3	4	-1.9893	0.198948	0.0254307	0.0148984	YES	-+					-+	-+				-*
Human Ovarian_Bignotti07_126genes_MetsvPrimary_up (17346539-Table2)	GeneSigDB	4	-2.02386	0.241286	0.0247768	0.0177352	YES		-+			-+	-+				-+
Human MesenchymalStemCells_Yamamoto08_83genes (18318837-Table1)	GeneSigDB	4	-2.04493	0.0454079	0.020289	0.00205718	YES	-*				-*		-*			-*
LIGAND_GATED_CHANNEL_ACTIVITY	MSigDB_C5	4	-2.04861	0.24721	0.0232944	0.013387	YES	-*	-*			-*		-*
GCM_CDH5	MSigDB_C4	4	-2.05251	0.268336	0.0252587	0.0198418	YES	-*	-*			-*		-*
MODULE_48	MSigDB_C4	4	-2.0725	0.181004	0.0207492	0.00943619	YES	-*					-*	-+			-*
GTGGGTGK_UNKNOWN	MSigDB_C3	4	-2.09212	0.257349	0.0201646	0.0122603	YES	-+		-+				-+			-+
CAR_HPX	MSigDB_C4	4	-2.10054	0.228821	0.0197333	0.0121977	YES	-*				--		-*			-*
LIU_SMARCA4_TARGETS	MSigDB_C2	4	-2.11062	0.256031	0.0201057	0.0131406	YES	-+	-+			-+		-+
HATADA_METHYLATED_IN_LUNG_CANCER_UP	MSigDB_C2	4	-2.13315	0.333908	0.0209503	0.0168219	YES		-*/**		-*/**			-+/-*				-*/**
RAPA_EARLY_UP.V1_DN	MSigDB_C6	4	-2.15044	0.23575	0.0153687	0.00688232	YES		**/-*	**/-*	**/-*	**/-*
V$CDX2_Q5	MSigDB_C3	4	-2.157	0.291678	0.0189912	0.0156614	YES	-+				-+		-+			-+
Human Lung_Wang05_64genes (15696083-Table1)	GeneSigDB	4	-2.20284	0.289841	0.0155014	0.0134279	YES	-*	-*			-*		-+
KRAS.AMP.LUNG_UP.V1_UP	MSigDB_C6	4	-2.21167	0.512599	0.0224765	0.0208753	YES	-*/**	-*/**		-*/**	--/-*
Human pancreas_Kim07_59genes (17414055-Table3)	GeneSigDB	4	-2.22241	0.319595	0.0159589	0.0166103	YES	-*	-*			-*		-+
SCHAEFFER_PROSTATE_DEVELOPMENT_12HR_DN	MSigDB_C2	4	-2.23277	0.247785	0.013432	0.0118555	YES	**/-+	*+/-+			*+/-*		*+/-+
NIKOLSKY_BREAST_CANCER_20Q12_Q13_AMPLICON	MSigDB_C2	4	-2.23327	0.391423	0.0169445	0.0116735	YES	-+	-*			-*		-*
V$FREAC7_01	MSigDB_C3	4	-2.26147	0.488762	0.0189922	0.0203434	YES		-*			-+		-+			-+
Human Leukemia_Schoch05_1441genes (15902281-TableS1d)	GeneSigDB	4	-2.26929	0.114508	0.0112564	0.00332057	YES	-+	-+						-+		-*
MODULE_157	MSigDB_C4	4	-2.27126	0.362445	0.0152508	0.0148069	YES	-*	-*			-*		-*
V$GATA1_04	MSigDB_C3	4	-2.30194	0.64335	0.0195059	0.0175806	YES	-*	-+			-*					-*
MODULE_111	MSigDB_C4	4	-2.30509	0.322324	0.0134769	0.0144208	YES	-*	-*			-*		-+
PIGF_UP.V1_DN	MSigDB_C6	4	-2.30667	0.773121	0.020816	0.0168372	YES	*+/-*			+*/-*			+*/-*				+*/-*
Mouse Breast_Piechocki07_87genes_GefitinibSensitiveResistant (17638894-Table2)	GeneSigDB	4	-2.31438	0.522757	0.0161916	0.0148128	YES		-+			-+		-+			-*
MIKKELSEN_ES_HCP_WITH_H3_UNMETHYLATED	MSigDB_C2	4	-2.32604	0.25046	0.00933653	0.0106317	YES	-*	-*			-*		-*
Stromal-2_DLBCL_survival_predictor	SignatureDB	4	-2.35244	0.413557	0.0114811	0.0112301	YES	-*	-*			-*		-+
CATION_TRANSMEMBRANE_TRANSPORTER_ACTIVITY	MSigDB_C5	4	-2.36706	0.717563	0.0232018	0.0257014	YES	-*				-*		-+			-*
SKELETAL_DEVELOPMENT	MSigDB_C5	4	-2.38581	0.83333	0.0206846	0.0203347	YES	-*				-+		-+			-+
HIF1alpha_1.5x_UP	SignatureDB	4	-2.40424	0.470513	0.0106949	0.0101383	YES		-+/+-	-+/**		-+/+-					-+/+-
Human Prostate_Stanbrough06_89genes (16510604-Table3)	GeneSigDB	4	-2.40754	0.569526	0.0135615	0.0158608	YES	-+	-+			-+					-+
Germinal_center_Bcell_DLBCL	SignatureDB	4	-2.41681	0.25739	0.00580468	0.00449495	YES	-+	-+			-+		-+
Lymph_node_LymphDx	SignatureDB	4	-2.42633	0.333352	0.00695991	0.00682317	YES	-+	-+			-+		-+
YAUCH_HEDGEHOG_SIGNALING_PARACRINE_DN	MSigDB_C2	4	-2.42656	0.638587	0.0171385	0.0188992	YES	**/-*	*+/-*			**/-*		*+/-*
chrxp22	MSigDB_C1	4	-2.44955	0.167472	0.00526896	0.00192824	YES	-+				-*		-+			-+
KRAS.KIDNEY_UP.V1_UP	MSigDB_C6	4	-2.45364	0.749672	0.0155487	0.0140376	YES	-*/**	-+/**			-*/*-		-+/*-
Human Intestine_Vecchi07_369genes (17297478-SuppTable6)	GeneSigDB	4	-2.49611	0.493234	0.00957768	0.010371	YES		-+			-+			-*		-+
VECCHI_GASTRIC_CANCER_ADVANCED_VS_EARLY_UP	MSigDB_C2	4	-2.49657	0.534938	0.0117942	0.0187967	YES		-+/**			-+/-*			-*/**		-+/**
MODULE_122	MSigDB_C4	4	-2.49719	0.561578	0.0101891	0.00974885	YES		-+			-+		-+			-+
SENGUPTA_NASOPHARYNGEAL_CARCINOMA_DN	MSigDB_C2	4	-2.50649	0.822778	0.0147346	0.0142871	YES				**/-*	++/-*		++/-+		*+/-*
REACTOME_PHASE1_FUNCTIONALIZATION_OF_COMPOUNDS	MSigDB_C2	4	-2.52045	0.600374	0.0115954	0.0155063	YES	-*				-*		-+			-+
chr12q13	MSigDB_C1	4	-2.52508	0.642372	0.0131392	0.0171766	YES	-+	-*			-*			-*
MOHANKUMAR_TLX1_TARGETS_DN	MSigDB_C2	4	-2.5315	0.54492	0.0101486	0.013848	YES					++/-+	**/-+	+*/-+			++/-*
REACTOME_SIGNALING_BY_GPCR	MSigDB_C2	4	-2.55952	0.911592	0.0153032	0.014771	YES					-*	-*	-*	-*
MODULE_55	MSigDB_C4	4	-2.58114	0.797418	0.0158436	0.0212942	YES		-*			-*		-+			-+
SHEN_SMARCA2_TARGETS_DN	MSigDB_C2	4	-2.6184	0.301335	0.00418757	0.00288655	YES	**/--				++/--		+-/-*				**/-*
MIKKELSEN_MEF_HCP_WITH_H3_UNMETHYLATED	MSigDB_C2	4	-2.63556	0.691733	0.011579	0.0160198	YES	-*	-*			--		-*
GCM_HMGA2	MSigDB_C4	4	-2.6454	0.687591	0.00817919	0.00877079	YES	-*				--		-*			--
MODULE_41	MSigDB_C4	4	-2.65625	0.372548	0.00564351	0.00708424	YES	-*				-*		-+			-*
DODD_NASOPHARYNGEAL_CARCINOMA_UP	MSigDB_C2	4	-2.70768	1.13703	0.0155471	0.0172012	YES		-+/+*			-*/+*		-+/+-		-+/+*
PROTEINACEOUS_EXTRACELLULAR_MATRIX	MSigDB_C5	4	-2.72137	0.508076	0.00594915	0.0103654	YES	-+	-+			-+		-+
EXTRACELLULAR_MATRIX	MSigDB_C5	4	-2.763	0.514846	0.00517104	0.00907283	YES	-+	-+			-+		-+
Mouse EmbryonicStemCell_Abranches09_919genes (19621087-Table1e)	GeneSigDB	4	-2.78669	0.784724	0.00705352	0.00810733	YES	-+	-+			-+		-+
REACTOME_GPCR_DOWNSTREAM_SIGNALING	MSigDB_C2	4	-2.80995	0.707685	0.0053437	0.00538129	YES					-*	-*	-+	-*
Mouse Breast_Piechocki08_558genes (18435859-ShorterGeneList)	GeneSigDB	4	-2.83946	0.832949	0.00733253	0.0089016	YES		-+			-+		-+			-+
SMID_BREAST_CANCER_BASAL_DN	MSigDB_C2	4	-2.87118	0.398231	0.00261152	0.00199866	YES	+*/-+	+*/-+			*+/-+		++/-+
BOQUEST_STEM_CELL_UP	MSigDB_C2	4	-3.26092	0.458904	0.000591414	0.000793722	YES		-+/*+			-+/*+		-+/*+			-+/**
MEISSNER_NPC_HCP_WITH_H3K4ME2_AND_H3K27ME3	MSigDB_C2	4	-3.346	0.7897	0.0012778	0.00164865	YES	-*	-*			-*		-+
PLASMA_MEMBRANE_PART	MSigDB_C5	4	-3.65024	1.62897	0.010876	0.0204774	YES	-*				-*		-+			-*
PLASMA_MEMBRANE	MSigDB_C5	4	-3.68815	1.54529	0.00664522	0.0123675	YES	-*				-+		-+			-*
RNA_BINDING	MSigDB_C5	3	6.28698	2.61113	6.43267e-06	5.8182e-06	YES		+*			+-		+-
RNA_PROCESSING	MSigDB_C5	3	5.75637	3.17467	0.000949113	0.00163666	YES		+*			+-		+-
REACTOME_METABOLISM_OF_RNA	MSigDB_C2	3	5.30242	3.20345	0.00120848	0.00196691	YES		+*			+-		+-
RIBONUCLEOPROTEIN_COMPLEX	MSigDB_C5	3	5.27028	1.82071	0.000180357	0.000300516	YES		+-			+-		+-
Human Lung_Magda08_21genes (18593933-Table1a)	GeneSigDB	3	5.25197	0.790833	0.000217921	0.000297754	YES	+*	+*					+*
Human Lymphoma_Kaminski03_33genes (12946996-Table3)	GeneSigDB	3	5.23888	2.63281	0.0104887	0.017867	YES		+*	+*					+*
CROONQUIST_IL6_DEPRIVATION_DN	MSigDB_C2	3	5.19425	2.61624	0.00737818	0.0127769	YES		**/+*					**/+*			**/+*
GNF2_KPNB1	MSigDB_C4	3	5.12209	3.77587	0.0154945	0.0266479	YES		+*			+-		+-
MIPS_NOP56P_ASSOCIATED_PRE_RRNA_COMPLEX	MSigDB_C2	3	5.11194	2.38844	0.00250767	0.00433566	YES		+*			+*		+-
ZHANG_TLX_TARGETS_36HR_DN	MSigDB_C2	3	5.07226	2.95928	0.0148923	0.0257915	YES		**/+*					**/+*	**/+*
Mouse DendriticCells_Bar-On10_7genes (20679228-TableS2)	GeneSigDB	3	5.05021	1.05159	0.0036447	0.00267554	YES				+*		+*	+*
Human Lymphoma_VanLoo09_40genes (19797726-Table2b)	GeneSigDB	3	5.02206	1.34906	0.000286901	0.000258758	YES	+*	+*					+*
Human Brain_Jrgensen05_19genes (16473350-Table2)	GeneSigDB	3	4.95069	1.22419	0.00914922	0.013052	YES				+*					+*		+*
RNA_SPLICING	MSigDB_C5	3	4.8877	2.78788	0.00251122	0.00378993	YES		+*			+*		+-
chr18p	MSigDB_C1	3	4.82461	0.131401	0.0404176	0.00161372	YES				+*					+*		+*
REN_BOUND_BY_E2F	MSigDB_C2	3	4.79671	1.8554	0.000997188	0.000983007	YES		+*					+-			+*
MORF_EIF4E	MSigDB_C4	3	4.77595	1.62637	0.00186985	0.00323514	YES		+*			+*		+-
TERAMOTO_OPN_TARGETS_CLUSTER_3	MSigDB_C2	3	4.70345	1.13839	0.00838012	0.00609369	YES		+*							+*	+*
KEGG_RNA_DEGRADATION	MSigDB_C2	3	4.68839	2.18129	0.00150531	0.00161708	YES		+*			+*		+*
Human Brain_Beier07_15genes (17483311-Table1a)	GeneSigDB	3	4.66945	0.943144	0.00913623	0.0112608	YES								++	+*		++
GNF2_ITGB2	MSigDB_C4	3	4.61348	0.790067	0.00177516	0.00284088	YES			+*				+*				+*
MORF_RAN	MSigDB_C4	3	4.58866	3.52769	0.00876164	0.0119406	YES					+*		+-			+*
MORF_XRCC5	MSigDB_C4	3	4.58563	2.09875	0.00101845	0.00131927	YES					+*		+-			+*
PID_IL27PATHWAY	MSigDB_C2	3	4.48204	1.7733	0.00800056	0.0119745	YES		+*	+*	+*
GNF2_DEK	MSigDB_C4	3	4.46523	2.87504	0.0114735	0.0127303	YES		+*					+-				+*
MORF_MSH2	MSigDB_C4	3	4.45943	2.20949	0.0122877	0.0212542	YES		+*			+*		+-
REACTOME_TRANSLATION	MSigDB_C2	3	4.44342	1.71766	0.00441116	0.0076361	YES		+*			+-		+-
Human Breast_Liu08_26genes (18786252-Table4)	GeneSigDB	3	4.41633	0.645098	0.00104712	0.000947909	YES		+*					+*			+*
REACTOME_METABOLISM_OF_MRNA	MSigDB_C2	3	4.40486	2.59041	0.00797478	0.0135419	YES		+*			+-		+-
Human Breast_Yu07_400genes (17894856-SuppList2)	GeneSigDB	3	4.37667	3.37747	0.0123185	0.0178134	YES		+*			+*		+*
CALVET_IRINOTECAN_SENSITIVE_VS_RESISTANT_DN	MSigDB_C2	3	4.36919	1.45615	0.0131306	0.00876437	YES				**/+*	**/+*	**/+*
GNF2_MSH2	MSigDB_C4	3	4.3374	2.22145	0.00937276	0.00859654	YES					+*		+*				+*
Human Breast_Hannemann06_78genes_DCIS (17069663-Table5)	GeneSigDB	3	4.32422	2.36921	0.0160206	0.0268515	YES	++					+*					++
Human Lymphoma_Jenner03_279genes (12925741-Figure8)	GeneSigDB	3	4.32309	3.36309	0.013045	0.0124022	YES		++					+-			+*
FIRESTEIN_CTNNB1_PATHWAY_AND_PROLIFERATION	MSigDB_C2	3	4.32265	1.79191	0.00940294	0.0149332	YES		+*			+*		+*
MIPS_55S_RIBOSOME_MITOCHONDRIAL	MSigDB_C2	3	4.31598	1.6225	0.00491216	0.00844638	YES		+-			+-		+-
GNF2_CD97	MSigDB_C4	3	4.31456	1.08013	0.00267298	0.00318691	YES			+*				+*				+*
WINNEPENNINCKX_MELANOMA_METASTASIS_UP	MSigDB_C2	3	4.28467	3.10019	0.0137873	0.0213519	YES		+*/**			+*/*+		+*/-+
Mouse Uterine_Kashiwazaki08_9genes (18661203-Table3)	GeneSigDB	3	4.28051	0.750663	0.0153298	0.00974479	YES			+*	+*		+*
REACTOME_SYNTHESIS_SECRETION_AND_INACTIVATION_OF_GIP	MSigDB_C2	3	4.26815	1.74251	0.00997889	0.014431	YES		+*	+*		+*
Human Breast_Thorner09_217genes (19043454-TableS2)	GeneSigDB	3	4.26472	2.68651	0.00770188	0.00887079	YES		+*					+*	+*
FERREIRA_EWINGS_SARCOMA_UNSTABLE_VS_STABLE_UP	MSigDB_C2	3	4.26101	2.78953	0.00674647	0.00835134	YES		+*/**			+-/**		+*/**
Human Lymphoma_Tome05_357genes (16081686-SuppTable2)	GeneSigDB	3	4.25367	2.28993	0.00901256	0.0136378	YES			+*				+*	+*
CHNG_MULTIPLE_MYELOMA_HYPERPLOID_UP	MSigDB_C2	3	4.24411	2.01829	0.0113997	0.0196231	YES		+*/**			+-/**		+-/**
REACTOME_G1_S_TRANSITION	MSigDB_C2	3	4.226	1.49865	0.0018698	0.0023225	YES		+-					+-			+*
Human Breast_Wood10_416genes (20103679-ST3-B)	GeneSigDB	3	4.22509	2.5533	0.00459635	0.00427203	YES		+*					+*			+*
ODONNELL_TARGETS_OF_MYC_AND_TFRC_DN	MSigDB_C2	3	4.18037	1.79395	0.00496615	0.00516	YES		*+/+*					++/+-			*+/+*
ST_STAT3_PATHWAY	MSigDB_C2	3	4.16072	1.43863	0.0122786	0.012785	YES			+*	+*			+*
REACTOME_SYNTHESIS_SECRETION_AND_INACTIVATION_OF_GLP1	MSigDB_C2	3	4.15387	1.51152	0.017675	0.027439	YES		+*	+*	+*
MACROMOLECULAR_COMPLEX	MSigDB_C5	3	4.13887	2.18803	0.00545815	0.00922096	YES		+*			+*		+-
Human Breast_Hu06_326genes (16643655-306GenesList)	GeneSigDB	3	4.1372	1.56158	0.0030697	0.0051711	YES	++	+*					++
MORF_CDC16	MSigDB_C4	3	4.11648	0.90175	0.00132433	0.00213406	YES		+*			+-		+-
WANG_CISPLATIN_RESPONSE_AND_XPC_UP	MSigDB_C2	3	4.10999	0.971736	0.00188942	0.00297541	YES							+*/++			+*/*+	+*/**
Mouse Bone_Kalajzic05_38genes (15834136-Table2)	GeneSigDB	3	4.09098	1.41882	0.00697486	0.0104836	YES	+*		+*				+*
REACTOME_EXTENSION_OF_TELOMERES	MSigDB_C2	3	4.08404	1.24581	0.00367253	0.00448247	YES					+*		+*			+*
Human Lymphoma_Melendez05_4229genes (15656903-SuppTable1)	GeneSigDB	3	4.07418	1.693	0.00115267	0.00157046	YES	++	++					++
GNF2_ELAC2	MSigDB_C4	3	4.06908	3.42051	0.0267849	0.0232553	YES		+*			+*		+-
RNA_SPLICINGVIA_TRANSESTERIFICATION_REACTIONS	MSigDB_C5	3	4.06904	1.94696	0.0107339	0.0168984	YES	+*	+*					+*
Mouse Pancreas_Thakur08_75genes (18218118-Table1)	GeneSigDB	3	4.06604	3.43442	0.0307457	0.0266329	YES		+*					+*			+*
REACTOME_SRP_DEPENDENT_COTRANSLATIONAL_PROTEIN_TARGETING_TO_MEMBRANE	MSigDB_C2	3	4.06499	1.25023	0.00365254	0.00629896	YES		+*			+-		+-
HORIUCHI_WTAP_TARGETS_DN	MSigDB_C2	3	4.05678	3.02731	0.0175983	0.0192177	YES							*+/+-	**/+*			*+/+*
REACTOME_INTERFERON_SIGNALING	MSigDB_C2	3	4.05325	1.07598	0.00162308	0.00183767	YES	+*			+-			+*
[truncated: 2,297 more rows]

## Sheet: ABC_upGCB
Signatures enriched in 2 or more data-set
Headings:
Signature: gene signature name, see SupplementalTable4 MetaProfileSignatureEnrichment for more info
Source: origin of gene signature, either MSigDB (C1 -- C6; Molecular Signatures Database v3.1), DU_MQ (from Ming-Qing Du), GeneSigDB (Version 4), SHIPP (from http://www.ncbi.nlm.nih.gov/pubmed/15550490) or SignatureDB (from http://lymphochip.nih.gov/signaturedb/index.html)
	MSigDB: These signatures can be searched for at http://www.broadinstitute.org/gsea/msigdb/index.jsp
	GeneSigDB: the code in parentheses is the Pubmed publication code that the signature is from followed by the table/figure location. The gene signature can be searched for at http://compbio.dfci.harvard.edu/genesigdb/ by entering the text within the parentheses (e.g. 16166618-SuppTable4).
	SignatureDB: these signatures are from http://lymphochip.nih.gov/signaturedb/index.html. Signatures can be searched for at http://lymphochip.nih.gov/signaturedb/query.htm. The exception is MYD88_Ngo_etal which is from http://www.ncbi.nlm.nih.gov/pubmed/21179087 supplemental table 1.
Number_of_Samples: number of samples that signature enriched in, un-adjusted p-value < 0.05
avgZscore: average standard score across samples enriched in
sdZscore: standard deviation of Zscores for enriched samples
avgProb: average probability across samples enriched in
sdProb: standard deviation of probabilities for enriched samples
ZScoresAllSameSign?: are all zScores +ve/-ve, i.e. are all samples enriched/depleted
Annotations per dataset: + = enriched <0.05 prob, - = depleted <0.05 prob, *= > 0.05 prob. For individual gene signatures (i.e. not a pair of _UP/_DN sets), first symbol relates to upABC, the second to upGCB, thus +- is up-regulated in ABC and depleted in GCB. For paired samples the first two symbols relate to _UP file and second two to _DN file. Thus *+/+* means that the _UP signature is enriche…
upGCB (ABC vs GCB)
Signature	Source	Number_of_Samples	avgZscore	sdZscore	avgProb	sdProb	ZScoresAllSameSign?	GSE10846_CHOP	GSE10846_CHOP_R	GSE12195	GSE19246	GSE22470	GSE22895	GSE31312	GSE32918	GSE34171	GSE4475	Monti
GCB_gt_ABC_U133plus	SignatureDB	11	43.806	9.61342	3.10296e-78	1.02913e-77	YES	-+	-+	-+	-+	-+	-+	-+	-+	-+	-+	-+
Human Leukemia_Lenz08_385genes (19038878-SuppTable3)	GeneSigDB	11	23.6113	9.37963	4.75192e-09	1.57546e-08	YES	-+	-+	-+	-+	-+	-+	-+	-+	-+	-+	-+
GC_B_cell_U133Plus	SignatureDB	11	21.8571	4.9934	7.34526e-25	2.40737e-24	YES	-+	-+	*+	-+	-+	-+	-+	-+	-+	-+	*+
Germinal_center_B_cell_DLBCL_survival_predictor	SignatureDB	11	20.4932	6.85374	4.73102e-14	1.06642e-13	YES	*+	*+	*+	*+	-+	*+	-+	*+	*+	*+	*+
Germinal_center_Bcell_DLBCL	SignatureDB	11	18.2547	5.99113	3.29124e-13	9.33353e-13	YES	-+	-+	*+	*+	-+	*+	-+	*+	*+	*+	*+
Lymph_node_U133plus	SignatureDB	11	17.4495	8.20864	0.000453815	0.00150433	YES	-+	-+	-+	*+	-+	-+	-+	*+	*+	-+	-+
Human Lymphoma_Tome05_151genes (16081686-SuppTable1)	GeneSigDB	11	17.4106	5.42325	9.70696e-14	2.43746e-13	YES	*+	*+	*+	*+	*+	*+	*+	*+	*+	*+	*+
GC_B_cell_BL_equal_DLBCL	SignatureDB	11	17.1802	4.70196	2.15734e-14	6.61973e-14	YES	-+	-+	*+	*+	-+	-+	-+	*+	*+	-+	*+
Lymph_node_LymphDx	SignatureDB	11	14.3729	6.57983	0.00574697	0.013735	YES	-+	-+	*+	*+	-+	*+	-+	*+	*+	*+	*+
Human Lymphoma_Chin09_65genes (19377508-SuppTable3)	GeneSigDB	11	12.3923	1.93954	3.88855e-09	1.20255e-08	YES	*+	-+	*+	*+	-+	*+	-+	*+	*+	*+	*+
Human Breast_Farmer05_3198genes_basal_apocrine_luminal (15897907-SuppTable2)	GeneSigDB	11	10.9086	4.81659	0.00407146	0.0135026	YES	++	++	++	++	++	++	++	++	*+	-+	++
BCR	SHIPP	11	10.4786	3.88113	1.47035e-09	3.83197e-09	YES	++	*+	++	++	++	++	++	*+	++	++	++
HOLLMANN_APOPTOSIS_VIA_CD40_UP	MSigDB_C2	11	10.4453	1.79096	8.45936e-11	1.6846e-10	YES	*+/+*	*+/+*	*+/+*	*+/+*	*+/+*	*+/+*	*+/+*	*+/**	*+/+-	*+/+*	*+/+-
GC_B_cell_BLlow_DLBCLhigh	SignatureDB	11	10.2108	2.26466	4.26325e-08	9.06611e-08	YES	-+	*+	*+	*+	-+	*+	*+	*+	*+	*+	*+
Human Lymphoma_Germinal07_18genes (19455257-TableS10)	GeneSigDB	11	9.36994	2.78578	0.000913061	0.00302501	YES	*+	*+	*+	*+	*+	*+	*+	*+	*+	*+	++
Human Lymphoma_Miyazaki08_70genes (18537973-SuppTable1b)	GeneSigDB	11	9.1453	1.84748	2.06364e-06	5.26613e-06	YES	*+	-+	*+	*+	-+	*+	-+	*+	*+	*+	*+
Human Lymphoma_Gentles09_780genes (19636063-TableS6)	GeneSigDB	11	8.86933	2.96705	4.21135e-06	1.38071e-05	YES	-+	*+	-+	-+	-+	-+	++	*+	*+	*+	-+
HUTTMANN_B_CLL_POOR_SURVIVAL_DN	MSigDB_C2	11	8.64377	0.809825	1.57451e-07	4.0551e-07	YES	+*/*+	+*/*+	+*/*+	**/*+	++/*+	+*/*+	+*/*+	**/*+	+*/*+	+*/*+	+*/++
WONG_ADULT_TISSUE_STEM_MODULE	MSigDB_C2	11	8.44132	3.64669	0.0010614	0.00304224	YES	*+	*+	*+	*+	-+	*+	-+	*+	*+	-+	*+
GCB_gt_ABC_Affy	SignatureDB	11	8.2908	2.12994	0.000276643	0.000665015	YES	*+	*+	*+	*+	*+	*+	*+	*+	*+	*+	*+
Human Immune_Allen10_2900genes (20220088-SuppTable1)	GeneSigDB	11	8.0955	2.56369	4.87938e-05	0.000160299	YES	++	++	++	++	*+	++	++	*+	++	*+	++
Human Breast_Nagaraja10_3054genes (20081105-ST-2)	GeneSigDB	11	8.00203	3.17287	0.00021088	0.000649898	YES	++	++	++	++	++	++	++	-+	++	*+	++
MODULE_456	MSigDB_C4	11	7.57169	2.45644	0.000583579	0.00170659	YES	*+	*+	++	*+	*+	*+	*+	*+	*+	*+	*+
GC_T_helper_up2x_Chtanova	SignatureDB	11	7.21849	2.01031	9.23486e-06	1.59752e-05	YES	*+	*+	*+	++	*+	++	*+	*+	*+	*+	++
MODULE_169	MSigDB_C4	11	7.20047	2.34005	0.000964541	0.00308661	YES	*+	*+	++	*+	*+	*+	*+	*+	*+	*+	*+
Human Immune_Kong10_2491genes_ImmPort_CD40LandAnti-IgMvsControl (20460173-ImmPortCD40LandAnti-IgMvsControl)	GeneSigDB	11	7.05085	3.19095	0.000974588	0.00218832	YES	++	++	++	++	++	++	++	*+	*+	++	++
Human Immune_Kong10_855genes_ImmPort_CD40LvsControl (20460173-ImmPortCD40LvsControl)	GeneSigDB	11	7.0479	2.09903	2.04218e-05	3.86606e-05	YES	++	++	++	++	*+	++	++	*+	*+	*+	++
Rat Hypothalamic_Mansuy10_1270genes (20937356-TableS1)	GeneSigDB	11	6.83233	2.85077	0.00209903	0.0044973	YES	++	*+	*+	++	-+	++	-+	*+	*+	*+	++
Human Lypmhoma_Leval07_832genes (17284527-TableS2)	GeneSigDB	11	6.79839	3.61813	0.00385139	0.0107627	YES	++	++	++	++	++	++	++	*+	++	++	++
Mouse Lung_not_cancer_Woodruff05_2037genes (16166618-SuppTable3)	GeneSigDB	11	6.57664	2.95501	0.00336258	0.0100214	YES	++	++	++	++	++	++	++	++	++	*+	++
SWEET_LUNG_CANCER_KRAS_DN	MSigDB_C2	11	6.53096	2.63093	0.0043939	0.0139219	YES	+*/*+	+*/*+	+*/*+	+*/++	*+/-+	*+/*+	+*/*+	**/*+	+*/*+	*+/*+	+*/++
HADDAD_B_LYMPHOCYTE_PROGENITOR	MSigDB_C2	11	6.36015	1.78433	0.000302864	0.000981974	YES	++	++	*+	++	++	++	++	*+	*+	++	++
CHEN_METABOLIC_SYNDROM_NETWORK	MSigDB_C2	11	6.35066	2.7461	0.0014432	0.00373986	YES	++	++	++	++	-+	*+	++	*+	++	*+	++
Mouse Viral_Buonomo11_5307genes (21205295-TableS1)	GeneSigDB	11	6.31131	2.24006	0.000324673	0.00107325	YES	*+	++	*+	++	*+	*+	++	*+	++	*+	*+
Mouse Viral_Mendoza-Villanueva08_1830genes (19036130-TableS1a)	GeneSigDB	11	6.16825	2.50446	0.0052985	0.0129664	YES	++	++	*+	*+	-+	*+	++	*+	*+	-+	++
Human Brain_Chen-Plotkin08_747genes (18223198-TableS3)	GeneSigDB	11	6.14255	2.06762	0.000291535	0.000940803	YES	*+	*+	*+	++	*+	*+	*+	*+	*+	-+	*+
BOQUEST_STEM_CELL_CULTURED_VS_FRESH_UP	MSigDB_C2	11	6.10062	2.54469	0.00443492	0.0134118	YES	*+/**	*+/*+	*+/*+	*+/**	*+/**	*+/**	*+/*+	*+/**	*+/**	-+/*+	*+/**
RODRIGUES_THYROID_CARCINOMA_ANAPLASTIC_DN	MSigDB_C2	11	6.0095	2.32283	0.00169992	0.00526967	YES	+*/++	+*/*+	**/*+	+-/++	+*/*+	**/++	+*/*+	*-/++	++/*+	**/++	+*/*+
Human Leukemia_Boag07_100genes_pre-BALLvCD34_UP (17760805-SuppTableS2a)	GeneSigDB	11	5.89208	1.72738	0.000311025	0.000340913	YES	*+	-+	*+	*+	-+	*+	-+	*+	*+	*+	*+
DUTERTRE_ESTRADIOL_RESPONSE_24HR_DN	MSigDB_C2	11	5.88332	2.40372	0.000991546	0.00241285	YES	**/*+	+*/*+	**/*+	**/++	*-/*+	*-/++	+-/*+	+*/*+	**/*+	+-/*+	+*/++
Human Lymphoma_Chin09_1201genes (19377508-SuppTable1)	GeneSigDB	11	5.84076	2.32068	0.00145373	0.00412906	YES	++	++	++	++	*+	++	++	++	++	*+	++
Mouse EmbryonicStemCell_Abranches09_1170genes (19621087-Table1d)	GeneSigDB	11	5.81309	2.45807	0.000475177	0.00118337	YES	*+	*+	*+	*+	-+	*+	-+	++	++	-+	*+
GC_T_helper_up4x_Chtanova	SignatureDB	11	5.80725	1.84694	0.000526897	0.000826133	YES	*+	*+	*+	++	*+	*+	*+	*+	*+	*+	++
SENESE_HDAC1_TARGETS_DN	MSigDB_C2	11	5.75302	2.30143	0.00564461	0.0118101	YES	+*/*+	+*/-+	+*/*+	+*/*+	++/-+	++/*+	++/*+	**/*+	++/*+	++/*+	+*/*+
Human Brain_Castells09_424gebes (19861896-SuppTable1)	GeneSigDB	11	5.67138	1.4426	0.000178515	0.000479676	YES	*+	*+	*+	*+	*+	++	*+	*+	*+	*+	*+
Resting_blood_B_cell_GNF	SignatureDB	11	5.62888	2.6612	0.00574191	0.0139478	YES	*+	++	*+	++	++	++	++	*+	*+	*+	++
PHONG_TNF_RESPONSE_NOT_VIA_P38	MSigDB_C2	11	5.62773	2.31254	0.0022806	0.00440957	YES	++	++	++	*+	*+	*+	++	*+	*+	*+	*+
Human Immune_Kong10_1790genes_ImmPort_Anti-IgMvsControl (20460173-ImmPortAnti-IgMvsControl)	GeneSigDB	11	5.60944	2.54941	0.00193277	0.00466944	YES	++	++	++	++	++	++	++	*+	*+	++	++
Human StemCell_West07_669genes (17234769-TableS2b)	GeneSigDB	11	5.57207	2.19441	0.00641285	0.0152359	YES	*+	*+	*+	-+	-+	*+	*+	*+	*+	*+	*+
SENESE_HDAC1_AND_HDAC2_TARGETS_DN	MSigDB_C2	11	5.56525	2.33829	0.00488792	0.00930076	YES	**/*+	++/*+	**/*+	+*/*+	*+/-+	*+/*+	++/*+	**/*+	++/*+	*+/*+	**/*+
RODRIGUES_THYROID_CARCINOMA_POORLY_DIFFERENTIATED_DN	MSigDB_C2	11	5.47072	2.07068	0.000859178	0.00260074	YES	+*/++	+-/*+	+-/*+	+*/++	+-/*+	**/++	+-/++	+-/*+	+*/*+	+*/*+	+*/++
HELLER_HDAC_TARGETS_SILENCED_BY_METHYLATION_UP	MSigDB_C2	11	5.41887	1.99372	0.00103501	0.00226723	YES	*+/+*	*+/++	*+/++	*+/+*	-+/++	*+/++	*+/++	++/*+	*+/++	*+/++	*+/++
CREIGHTON_ENDOCRINE_THERAPY_RESISTANCE_5	MSigDB_C2	11	5.32272	2.05489	0.00471903	0.00905521	YES	*+	*+	*+	++	*+	++	*+	*+	*+	*+	*+
CD40_Burkitt_lymphoma_DN	SignatureDB	11	5.27776	1.75248	0.00162315	0.00275303	YES	++/*+	++/*+	+*/*+	++/*+	++/*+	++/*+	++/*+	++/*+	+*/*+	++/*+	++/*+
BASSO_CD40_SIGNALING_DN	MSigDB_C2	11	5.24757	1.71358	0.00235077	0.00463983	YES	++/*+	++/*+	+*/*+	++/*+	++/*+	++/*+	++/*+	++/*+	+*/*+	++/*+	++/*+
Human StemCell_Davicioni06_534genes (16849537-SuppTable2)	GeneSigDB	11	5.23442	2.47591	0.00391483	0.0105777	YES	*+	*+	*+	*+	*+	*+	*+	*+	*+	*+	*+
Human Breast_Creighton08_643genes (18794137-SuppTable1e)	GeneSigDB	11	5.20575	2.02143	0.00525997	0.0109054	YES	*+	*+	*+	++	*+	++	*+	*+	*+	*+	*+
PENG_LEUCINE_DEPRIVATION_UP	MSigDB_C2	11	5.17426	1.46759	0.000797481	0.00155772	YES	++/+-	*+/+-	*+/+*	*+/+-	*+/+*	*+/**	*+/+-	*+/**	*+/*-	*+/+-	*+/+-
Human Bone_Heller08_470genes (18172295-SuppTable3)	GeneSigDB	11	5.09185	1.97081	0.0020192	0.00379786	YES	*+	*+	*+	*+	-+	*+	*+	++	*+	*+	*+
GOBERT_OLIGODENDROCYTE_DIFFERENTIATION_DN	MSigDB_C2	11	5.08761	2.37434	0.0050908	0.0129819	YES	*+/*+	+*/*+	**/*+	**/++	+*/-+	**/*+	+*/*+	+*/*+	*+/*+	+*/-+	+*/*+
GOZGIT_ESR1_TARGETS_DN	MSigDB_C2	11	5.07056	2.14694	0.00347485	0.0068312	YES	**/*+	**/*+	*+/*+	+*/++	*+/-+	*+/++	*+/*+	*+/*+	*+/*+	*+/*+	**/++
SMID_BREAST_CANCER_BASAL_DN	MSigDB_C2	11	4.98805	2.02119	0.000609618	0.00113741	YES	+*/-+	+*/-+	+*/*+	**/*+	*+/-+	*+/*+	++/-+	+*/*+	**/*+	*+/*+	+*/*+
Human Leukemia_Zangrando09_1001genes (19549311-SuppTable2-MMLandPhenotype)	GeneSigDB	11	4.97571	1.60208	0.00182304	0.00494905	YES	++	++	++	++	++	++	++	*+	++	*+	++
Human Leukemia_Kiiveri08_100genes_E2A-PBX1Tree (18410693-TableS4)	GeneSigDB	11	4.95543	1.33397	0.00516016	0.014474	YES	++	++	++	*+	++	++	*+	*+	*+	++	*+
Human Sarcoma_Missiaglia10_176genes (20502458-TableS6a)	GeneSigDB	11	4.92646	1.90475	0.00558386	0.00991778	YES	*+	++	++	++	*+	++	++	*+	++	++	++
PASTURAL_RIZ1_TARGETS_UP	MSigDB_C2	11	4.91111	1.17619	0.00449651	0.00493299	YES	*+/**	*+/**	*+/**	*+/**	*+/**	*+/**	*+/*+	*+/**	*+/**	*+/**	*+/**
Human Leukemia_Kiiveri08_100genes_E2A-PBX1Parallel (18410693-TableS10)	GeneSigDB	11	4.80252	1.29605	0.00353396	0.00800819	YES	*+	++	++	*+	*+	*+	*+	*+	*+	++	*+
Myc_ChIP_PET_Expr_DN	SignatureDB	11	4.79841	1.30747	0.00092619	0.0016354	YES	+*/++	+-/++	*-/++	+-/++	+-/*+	**/++	+-/++	*-/*+	**/++	+-/++	+*/*+
RIGGI_EWING_SARCOMA_PROGENITOR_UP	MSigDB_C2	11	4.7911	1.68935	0.00403939	0.012048	YES	*+/*+	*+/*+	*+/*+	++/**	*+/-+	++/*+	*+/-+	*+/*+	*+/*+	*+/*+	*+/**
P53_DN.V1_UP	MSigDB_C6	11	4.74663	1.33471	0.00363775	0.00970394	YES	*+/*+	*+/*+	*+/**	*+/**	-+/*+	*+/*+	*+/*+	*+/**	-+/**	*+/*+	*+/**
BMI1_DN_MEL18_DN.V1_UP	MSigDB_C6	11	4.66266	1.83968	0.00511041	0.00860934	YES	*+/**	*+/**	*+/**	*+/**	-+/**	*+/**	*+/*+	*+/**	*+/*+	*+/*+	*+/**
Human Leukemia_Verhaak05_568genes (16109776-TableS1)	GeneSigDB	11	4.64646	1.58485	0.00284312	0.00631392	YES	*+	++	*+	*+	*+	*+	++	*+	++	-+	++
Myc_ChIP_PET_2plus	SignatureDB	11	4.5984	1.81633	0.00353306	0.00874414	YES	++	++	*+	++	++	++	++	*+	++	*+	*+
Leucine_starve_UP	SignatureDB	11	4.57499	1.43036	0.00136121	0.00166477	YES	++/+-	++/+-	*+/+*	*+/+*	*+/+-	*+/**	++/+-	*+/+-	*+/**	*+/+-	*+/+-
BASAKI_YBX1_TARGETS_DN	MSigDB_C2	11	4.5735	1.49988	0.00243415	0.00596303	YES	+*/*+	+*/*+	**/*+	**/++	**/*+	**/++	+*/++	+*/*+	**/++	**/*+	**/*+
Human Breast_Yau08_1518genes_OxidativeStress (18631401-TableS3)	GeneSigDB	11	4.52706	1.71679	0.00214548	0.0041619	YES	++	++	++	++	++	++	++	*+	++	++	++
RAF_UP.V1_DN	MSigDB_C6	11	4.43548	1.14031	0.00325339	0.00590553	YES	**/*+	+*/*+	*+/*+	+*/++	*+/*+	*+/*+	*+/*+	**/*+	**/*+	*+/*+	++/*+
VERHAAK_AML_WITH_NPM1_MUTATED_DN	MSigDB_C2	11	4.33458	1.58457	0.00639725	0.0103821	YES	**/*+	+*/*+	**/++	**/*+	*+/*+	*+/*+	++/*+	**/*+	**/++	*+/*+	++/++
Human Sarcoma_Filion09_404genes (18855877-TableS2)	GeneSigDB	11	4.31391	1.04357	0.00169812	0.00342226	YES	*+	*+	*+	*+	-+	*+	*+	*+	++	*+	*+
Human Kidney_Zhao06_259genes (16318415-TableS1)	GeneSigDB	11	4.26681	1.52415	0.00585642	0.0120142	YES	*+	*+	*+	*+	*+	*+	*+	++	++	*+	*+
PLASARI_TGFB1_TARGETS_10HR_DN	MSigDB_C2	11	4.145	1.54241	0.00912257	0.0161196	YES	++/*+	*+/*+	*+/*+	++/*+	*+/-+	*+/*+	*+/*+	**/*+	++/*+	*+/*+	*+/*+
MULLIGHAN_MLL_SIGNATURE_2_DN	MSigDB_C2	11	4.13367	1.35172	0.00890925	0.0161035	YES	+*/++	++/++	+*/*+	**/++	*+/++	++/++	+*/++	**/*+	+*/*+	++/*+	**/++
SMID_BREAST_CANCER_LUMINAL_B_DN	MSigDB_C2	11	4.1249	1.74948	0.00602441	0.00905667	YES	*+/*+	*+/*+	**/++	*+/*+	**/-+	**/*+	*+/++	*+/*+	*+/*+	**/-+	*+/++
Human Breast_Rouzier05_298genes_4classes (16115903-TableS1)	GeneSigDB	11	4.08616	1.81943	0.0063938	0.00811328	YES	*+	*+	*+	*+	-+	*+	*+	*+	*+	*+	*+
MASSARWEH_TAMOXIFEN_RESISTANCE_DN	MSigDB_C2	11	3.9163	1.22937	0.00494031	0.00729547	YES	++/*+	*+/*+	**/*+	+*/++	*+/*+	*+/*+	*+/*+	**/*+	*+/*+	*+/*+	*+/++
SMID_BREAST_CANCER_NORMAL_LIKE_UP	MSigDB_C2	11	3.89092	1.3367	0.00238098	0.00224143	YES	++/**	++/**	++/**	*+/**	*+/**	++/**	++/**	*+/**	*+/**	*+/**	++/**
Human Breast_Liu08_1878genes (18786252-TableS1)	GeneSigDB	11	3.82937	1.39552	0.00763092	0.0153543	YES	*+	++	*+	*+	*+	*+	++	*+	*+	*+	*+
MODULE_493	MSigDB_C4	11	3.78611	0.956145	0.0100748	0.0144951	YES	*+	*+	*+	*+	*+	*+	-+	*+	*+	*+	*+
GAVIN_FOXP3_TARGETS_CLUSTER_P4	MSigDB_C2	11	2.78835	0.552036	0.0190901	0.0155937	YES	*+	*+	*+	*+	*+	*+	*+	*+	*+	*+	*+
PENG_GLUTAMINE_DEPRIVATION_DN	MSigDB_C2	11	-2.5501	0.661489	0.0114439	0.014484	YES	*+/+-	*+/+-	**/+-	*+/+-	**/+-	**/+-	+*/+-	**/*-	*+/*-	**/+-	*+/+-
Glutamine_starve_DN	SignatureDB	11	-2.8518	0.719897	0.00392935	0.00482515	YES	*+/+-	*+/+-	*+/*-	*+/+-	*+/+-	*+/+-	++/+-	**/*-	*+/*-	*+/+-	*+/+-
ABCgtGCB_U133AB	SignatureDB	11	-3.40793	1.12498	0.00193731	0.00280394	YES	+-	+-	+-	+-	+-	+-	+-	+-	+-	+-	+-
Stromal-1_DLBCL_survival_predictor	SignatureDB	10	22.4943	9.77194	9.72865e-07	3.07634e-06	YES	-+	-+	-+		-+	-+	-+	-+	-+	-+	-+
Lymph_node_High_vs_low	SignatureDB	10	21.192	11.186	1.05935e-05	3.34708e-05	YES	-+	-+	-+		-+	-+	-+	-+	-+	-+	-+
SCHUETZ_BREAST_CANCER_DUCTAL_INVASIVE_UP	MSigDB_C2	10	14.7955	6.40988	0.00163915	0.00518345	YES	*+/**	*+/+*	*+/**		-+/**	-+/**	*+/*+	*+/**	*+/*+	-+/**	*+/+*
MODULE_47	MSigDB_C4	10	12.5125	5.54584	0.000464372	0.00138691	YES	*+	-+	*+		-+	*+	-+	*+	*+	*+	*+
BOQUEST_STEM_CELL_UP	MSigDB_C2	10	11.9616	5.53071	0.00142085	0.00360887	YES	*+/*+	-+/*+	*+/**		-+/*+	*+/**	-+/*+	*+/**	*+/**	-+/**	*+/*+
Human Breast_Vecchi08_792genes (17952122-GeneList)	GeneSigDB	10	11.8081	4.05497	6.66064e-05	0.000210597	YES	*+	*+	*+	*+	*+	++	++		++	*+	++
TURASHVILI_BREAST_LOBULAR_CARCINOMA_VS_LOBULAR_NORMAL_DN	MSigDB_C2	10	9.76439	4.31985	0.00476267	0.0149364	YES	**/*+	**/*+	**/*+		*+/*+	**/*+	*+/*+	**/*+	**/*+	**/*+	**/*+
Human Kidney_Sallustio10_2134genes_CompleteListAnalysis (19843711-TableS2)	GeneSigDB	10	9.28178	3.76383	0.00441772	0.0139699	YES	++	++	*+		++	*+	++	*+	++	*+	++
MODULE_1	MSigDB_C4	10	9.25718	3.9221	0.00154838	0.0046313	YES	*+	-+	*+		-+	*+	*+	*+	*+	-+	*+
Human Kidney_Sallustio10_2134genes_DiscriminatedARPCsFromRPTEC_MSC (19843711-TableS1)	GeneSigDB	10	9.19897	3.73969	0.0049033	0.0155054	YES	++	++	*+		++	*+	++	-+	++	*+	++
Human Breast_Feng07_58genesDownRegulated (17123152-Table3a)	GeneSigDB	10	9.17295	3.9923	0.00224134	0.00683547	YES	*+	*+	*+		-+	*+	*+	*+	*+	*+	*+
Human Intestine_Vecchi07_415genes (17297478-SuppTable2)	GeneSigDB	10	8.99684	3.87008	0.00284223	0.00893651	YES	-+	-+	*+	*+	-+	*+	-+		*+	-+	*+
Human Intestine_Vecchi07_369genes (17297478-SuppTable6)	GeneSigDB	10	8.92083	3.77432	0.00259093	0.00815106	YES	*+	-+	*+	*+	-+	*+	*+		*+	-+	*+
WANG_SMARCE1_TARGETS_UP	MSigDB_C2	10	8.71792	3.28284	0.00328714	0.0103937	YES	*+/++	-+/++	*+/+*	*+/+*	-+/++	*+/*+	-+/++		*+/*+	*+/*+	*+/+*
GC_B_cell_BLhigh_DLBCLlow	SignatureDB	10	8.70184	2.51446	0.000167657	0.000507495	YES	*+	*+	*+	*+	-+	*+	*+	*+	*+		*+
CHICAS_RB1_TARGETS_CONFLUENT	MSigDB_C2	10	8.64743	2.62572	6.81131e-06	2.11194e-05	YES	*+	*+	*+		-+	++	*+	*+	*+	*+	++
Human Breast_Wang05_410genes_up_BT-BAF57cells (16135788-Table13)	GeneSigDB	10	8.51573	3.09714	0.00277858	0.00878572	YES	*+	-+	*+	*+	-+	*+	-+		*+	*+	*+
CHARAFE_BREAST_CANCER_LUMINAL_VS_MESENCHYMAL_DN	MSigDB_C2	10	8.31235	4.12332	0.00538128	0.0156472	YES	++/*+	*+/*+	**/*+		*+/-+	+*/*+	*+/*+	*+/*+	+*/++	+*/-+	**/++
Human Breast_Turashvili07_208genes (17389037-Tab6)	GeneSigDB	10	8.17449	3.22899	0.00421296	0.0132183	YES	*+	*+	*+		*+	*+	*+	*+	*+	*+	*+
LIM_MAMMARY_STEM_CELL_UP	MSigDB_C2	10	7.88975	3.1217	0.000985386	0.00227776	YES	*+/+*	*+/**	*+/*-		-+/**	*+/**	-+/**	*+/**	*+/**	*+/**	*+/**
MODULE_12	MSigDB_C4	10	7.84448	2.75889	0.000105349	0.000259437	YES	*+	-+	*+		-+	*+	-+	*+	*+	*+	*+
MODULE_122	MSigDB_C4	10	7.69817	4.49068	0.00554786	0.0121967	NO	*+	-+	*+	*-	-+	*+	-+	*+	*+	-+
Human Breast_Mackay07_1395GenesUpRegulated (17555561-Table2)	GeneSigDB	10	7.56791	2.8184	0.00339812	0.0106956	YES	++	++	*+		*+	++	++	*+	++	*+	++
Human StemCell_Cai06_1370genes (16293578-SuppTable2)	GeneSigDB	10	7.53943	2.43701	5.94939e-05	0.000180563	YES	++	*+	*+		*+	++	*+	*+	*+	*+	++
Human Breast_Charafe-Jauffret06_1309genes (16288205-GeneTable3)	GeneSigDB	10	7.38822	3.09994	0.000369347	0.000906899	YES	*+	*+	*+		*+	*+	*+	*+	++	*+	++
Human Lymphoma_Jaye07_genes (17573669-SuppTable1)	GeneSigDB	10	7.36552	2.53585	0.000711321	0.00149348	YES	++	*+	*+	*+	*+	++	++	*+	*+		*+
Human Viral_Scott04_135genes (14749371-Table2)	GeneSigDB	10	7.3479	3.0146	0.00544425	0.0139486	YES	*+	*+	*+		-+	*+	-+	*+	*+	*+	*+
Mouse Breast_Astolfi05_1104genes_TumorGenes (15793299-TableC)	GeneSigDB	10	7.27269	2.77759	0.000187895	0.000520338	YES	++	++	++		*+	*+	*+	*+	*+	*+	++
LINDVALL_IMMORTALIZED_BY_TERT_DN	MSigDB_C2	10	7.24473	2.39265	0.000506071	0.00120589	YES	+*/*+	*+/*+	**/*+		*+/-+	**/*+	*+/*+	**/*+	+*/*+	**/*+	**/*+
MODULE_2	MSigDB_C4	10	7.05445	2.99815	0.0021304	0.00651535	YES	*+	*+	*+		-+	*+	*+	*+	*+	-+	*+
CHIANG_LIVER_CANCER_SUBCLASS_CTNNB1_DN	MSigDB_C2	10	6.93271	2.70838	0.00170769	0.00374493	YES	*+/*+	+*/*+	*+/*+		**/*+	**/*+	*+/*+	**/*+	**/*+	**/*+	**/++
Human HeadandNeck_Cromer04_64genes (14676830-Table4)	GeneSigDB	10	6.89865	2.84282	0.00544232	0.0114694	YES	*+	*+	*+		-+	*+	-+	*+	*+	-+	*+
AACTTT_UNKNOWN	MSigDB_C3	10	6.89245	1.74301	6.94087e-05	0.000219213	YES	*+	*+	++	++	-+	++	*+		*+	*+	*+
PASINI_SUZ12_TARGETS_DN	MSigDB_C2	10	6.78895	2.04923	0.000521649	0.00115331	YES	**/*+	**/*+	**/*+		**/-+	**/*+	**/*+	**/*+	**/*+	**/-+	**/*+
CROMER_TUMORIGENESIS_UP	MSigDB_C2	10	6.74247	2.77531	0.00605932	0.0127347	YES	*+/**	*+/**	*+/**		-+/-*	*+/**	-+/-*	*+/**	*+/**	-+/**	*+/**
LU_AGING_BRAIN_UP	MSigDB_C2	10	6.69076	2.49078	0.00299521	0.00937956	YES	*+/++	*+/**	*+/+*		*+/*+	*+/*+	*+/**	*+/**	*+/*+	*+/**	++/**
CUI_TCF21_TARGETS_2_DN	MSigDB_C2	10	6.67834	2.29881	0.000320427	0.000697338	YES	*+/++	*+/++	-+/++	**/++	*+/*+	*+/++	*+/++		*+/++	*+/*+	**/++
BAELDE_DIABETIC_NEPHROPATHY_DN	MSigDB_C2	10	6.64947	2.20453	0.00034459	0.00104261	YES	**/++	-+/++	**/++	**/++	-+/++	*+/++	**/++		**/++	**/*+	**/++
ROZANOV_MMP14_TARGETS_UP	MSigDB_C2	10	6.58118	2.1589	0.000199454	0.000422136	YES	*+/**	*+/**	*+/**	*+/**	*+/*+	*+/*+	*+/*+	*+/**	*+/**	*+/**
SCHAEFFER_PROSTATE_DEVELOPMENT_48HR_DN	MSigDB_C2	10	6.27851	1.89919	0.000109225	0.000221441	YES	++/*+	*+/*+	*+/*+	**/*+	*+/-+	++/*+	-+/*+		**/*+	*+/*+	*+/-+
LEE_BMP2_TARGETS_UP	MSigDB_C2	10	6.24798	2.08561	0.00144852	0.0045431	YES	*+/+*	*+/+*	*+/+*	*+/+-	-+/+*	*+/**	*+/+-	*+/*-	-+/+*	*+/+*
Mouse Lymphoma_Wu08_1813genes (18535662-TableS1a)	GeneSigDB	10	6.18517	2.43329	0.00201038	0.00473851	YES	++	++	++	++	*+	*+	++		*+	*+	++
Mouse Lung_not_cancer_Woodruff05_2371genes (16166618-SuppTable4)	GeneSigDB	10	6.17015	2.86688	0.00589208	0.0147169	YES	++	++	++		++	++	++	++	++	++	++
Human Uterine_Santin05_178genes (15785748-Table3)	GeneSigDB	10	6.15933	2.35426	0.00460581	0.00994068	YES	-+	-+	-+		-+	*+	-+	*+	*+	-+	*+
Human Brain_Freije04_595genes (15374961-TableS2)	GeneSigDB	10	6.0011	2.68802	0.00877123	0.0184161	YES	*+	*+	*+		-+	*+	++	*+	*+	*+	++
CHARAFE_BREAST_CANCER_LUMINAL_VS_BASAL_DN	MSigDB_C2	10	5.98654	2.71809	0.00650799	0.0120967	YES	*+/++	*+/++	*+/*+		*+/*+	**/++	*+/++	**/*+	+*/++	**/*+	**/++
Human Breast_Charafe-Jauffret06_1233genes (16288205-GeneTable2)	GeneSigDB	10	5.9406	2.45887	0.00571146	0.0155786	YES	++	++	*+	++	*+	++	++		++	*+	++
DAVICIONI_TARGETS_OF_PAX_FOXO1_FUSIONS_UP	MSigDB_C2	10	5.93816	1.97699	0.00172932	0.00516319	YES	*+/*+	*+/*+	*+/**	++/**	*+/*+	*+/**	*+/*+		*+/**	*+/**	*+/**
Human StemCell_Majeti09_3024genes (19218430-TableS3)	GeneSigDB	10	5.90032	2.45616	0.000281026	0.000745677	YES	++	++	++	++	++	++	++		++	++	++
Human StemCell_Davicioni06_389genes (16849537-SuppTable3)	GeneSigDB	10	5.88078	1.8988	0.00211366	0.00653137	YES	*+	*+	*+	++	*+	++	*+		*+	*+	*+
Human Leukemia_Bresolin10_40genes (20231685-TableA2)	GeneSigDB	10	5.72152	1.82024	0.00254495	0.00581971	YES	*+	*+	*+	*+	*+	*+	*+	*+	*+		*+
Blimp_Bcell_repressed	SignatureDB	10	5.67275	2.08478	0.00225889	0.00357481	YES	*+	*+	*+	*+	*+	++	++	*+	*+		++
Human Embryo_Heim07_2325genes (17880687-TableS2)	GeneSigDB	10	5.65551	1.89572	0.000319479	0.000964308	YES	++	++	++		*+	++	++	++	++	*+	++
IZADPANAH_STEM_CELL_ADIPOSE_VS_BONE_DN	MSigDB_C2	10	5.62674	2.16025	0.00466462	0.0128621	YES	+*/*+	+*/-+	+*/*+	+*/*+	+*/-+	++/*+	+*/*+		+*/*+	*+/*+	+*/*+
Mouse Skin_Driskell09_1477genes (19605494-TableS2)	GeneSigDB	10	5.62298	1.73664	0.000536766	0.00154782	YES	*+	++	*+		*+	*+	*+	*+	*+	*+	++
RTAAACA_V$FREAC2_01	MSigDB_C3	10	5.55154	1.66476	0.0023282	0.00726817	YES	-+	*+	*+	*+	-+	*+	*+		*+	*+	*+
WAMUNYOKOLI_OVARIAN_CANCER_LMP_DN	MSigDB_C2	10	5.51139	2.13119	0.00447167	0.0111453	YES	+*/*+	+*/*+	+*/*+		+*/*+	**/*+	+*/*+	**/*+	**/*+	+*/*+	**/*+
Human StemCell_Tondreau08_52genes (18405367-Table2b)	GeneSigDB	10	5.48208	1.47553	0.00497674	0.0146757	YES	*+	-+	*+		*+	*+	*+	*+	*+	*+	*+
Human Breast_Rodningen08_355genes_risk (17963910-SuppTable1)	GeneSigDB	10	5.46774	2.10442	0.00300422	0.00746669	YES	*+	*+	*+		*+	*+	*+	*+	*+	-+	*+
Human Ovarian_Donninger04_1191genes (15361855-SuppTable1)	GeneSigDB	10	5.46583	1.52211	0.000305139	0.000612263	YES	*+	++	*+	*+	*+	*+	++		*+	*+	*+
TTGTTT_V$FOXO4_01	MSigDB_C3	10	5.42189	1.63678	0.000406366	0.00111592	YES	*+	*+	++	*+	-+	*+	*+		*+	*+	*+
Human Lypmhoma_Leval07_644genes (17284527-TableS1)	GeneSigDB	10	5.38564	1.16924	0.000577381	0.00180688	YES	*+	++	++		*+	++	++	*+	++	*+	++
Human Liver_Capurso06_990genes (16728581-SuppTable1)	GeneSigDB	10	5.35827	1.32546	0.000815627	0.00237587	YES	++	++	*+		*+	*+	++	*+	*+	*+	*+
SENESE_HDAC2_TARGETS_DN	MSigDB_C2	10	5.32907	1.4595	0.0032026	0.00951873	YES	+*/*+	+*/*+	**/*+		**/-+	**/*+	+*/*+	**/*+	+*/*+	**/*+	**/*+
Human Viral_VanMeter06_56genes (17122647-Table3)	GeneSigDB	10	5.2937	2.40734	0.00519583	0.00892265	YES	*+	-+	*+	*+	-+	*+	*+		*+	*+	*+
Human Viral_Wang04_1482genes (15220918-TableS1a)	GeneSigDB	10	5.2432	2.18929	0.00175155	0.0038977	YES	++	++	++		*+	++	++	*+	++	++	++
Mouse Lymphoma_Wu08_1148genes (18535662-TableS2c)	GeneSigDB	10	5.22829	2.15089	0.00458972	0.0109552	YES	++	++	++	*+	*+	*+	++		*+	*+	*+
Human Skin_Micke07_42genes (17273163-Supp1a)	GeneSigDB	10	5.12224	1.54125	0.00516305	0.0146144	YES	*+	-+	*+		*+	*+	*+	*+	*+	*+	*+
CAMP_UP.V1_DN	MSigDB_C6	10	5.11636	1.14784	0.00131422	0.00392433	YES	+*/*+	+*/*+	**/*+		+*/*+	+*/*+	+*/*+	+*/*+	**/*+	+*/*+	+*/*+
Glutamine_starve_UP	SignatureDB	10	5.05122	1.71458	0.00535596	0.0148746	YES	*+/+-	*+/+-	*+/*-	*+/+-	*+/+-	*+/+-	++/+-		*+/*-	*+/+-	*+/+-
MIYAGAWA_TARGETS_OF_EWSR1_ETS_FUSIONS_UP	MSigDB_C2	10	4.98833	1.87478	0.00843377	0.0173865	YES	++/*+	*+/*+	*+/*+	++/**	*+/-+	*+/*+	*+/*+		*+/*+	-+/*+	*+/+*
Mouse StemCell_Forsberg05_606genes (16151515-TableS4)	GeneSigDB	10	4.96579	1.4952	0.0043523	0.0126202	YES	*+	*+	*+		-+	*+	*+	*+	*+	*+	*+
Human Immune_Kong10_5640genes_ImmPort_ComprehensiveListofImmune-RelatedGenes (20460173-ImmPortComprehensiveListofImmune-RelatedGenes)	GeneSigDB	10	4.93722	1.74304	0.000802833	0.00194437	YES	++	++	++		*+	*+	++	++	*+	-+	++
Human Leukemia_Juric07_617genes (17312329-SuppTable2)	GeneSigDB	10	4.88206	1.38722	0.000816339	0.00170738	YES	++	*+	*+	++	*+	++	++		++	*+	*+
Human Embryo_Heim07_1515genes (17880687-TableS3)	GeneSigDB	10	4.86079	1.89558	0.00324298	0.00879567	YES	++	*+	*+		-+	*+	*+	*+	*+	-+	*+
MORI_LARGE_PRE_BII_LYMPHOCYTE_DN	MSigDB_C2	10	4.82645	1.93711	0.00374332	0.004976	YES	**/*+	**/*+		**/*+	**/-+	**/*+	+*/*+	**/*+	**/*+	*-/*+	**/*+
FOSTER_TOLERANT_MACROPHAGE_DN	MSigDB_C2	10	4.80237	1.37954	0.00184106	0.00367423	YES	**/++	**/++	**/++	+-/++	*+/*+	**/++	++/++		*-/++	*+/*+	**/++
KOINUMA_TARGETS_OF_SMAD2_OR_SMAD3	MSigDB_C2	10	4.75402	1.73267	0.00536377	0.0144225	YES	++	++	*+		*+	*+	++	*+	*+	*+	++
MODULE_6	MSigDB_C4	10	4.74171	1.96699	0.00513073	0.00735587	YES	*+	*+	*+		-+	*+	*+	*+	*+	*+	*+
DAZARD_RESPONSE_TO_UV_NHEK_DN	MSigDB_C2	10	4.67917	1.31548	0.00086919	0.00122465	YES	+*/++	+*/++	**/*+	**/++	+*/++	**/++	+-/++		**/*+	++/*+	**/++
JOHNSTONE_PARVB_TARGETS_2_DN	MSigDB_C2	10	4.64147	1.7083	0.00217098	0.00304848	YES	**/*+	-+/++	**/*+	**/++	-+/++	-*/*+	**/++		**/*+	**/-+	**/*+
Human Breast_van'tVeer02_430genes_ERgenes (11823860-SuppTable4)	GeneSigDB	10	4.6291	1.30405	0.00409382	0.0119191	YES	++	++	++		*+	*+	++	*+	*+	*+	++
REACTOME_CYTOSOLIC_SULFONATION_OF_SMALL_MOLECULES	MSigDB_C2	10	4.61596	1.64835	0.0125447	0.0168593	YES	*+	*+	*+	*+	*+	*+		*+	*+	*+	*+
SH2_DOMAIN_BINDING	MSigDB_C5	10	4.60918	0.888657	0.004258	0.00660478	YES	*+	++	*+	++	*+		++	*+	*+	*+	*+
Human Breast_Turashvili07_171genes (17389037-Tab3)	GeneSigDB	10	4.5972	1.48661	0.00564764	0.0124541	YES	*+	*+	*+		*+	*+	++	*+	*+	*+	*+
Human Liver_Chao09_1031genes (18787218-tableS1)	GeneSigDB	10	4.59254	1.63095	0.00504934	0.0144296	YES	++	++	++		*+	*+	*+	*+	*+	*+	++
PENG_RAPAMYCIN_RESPONSE_UP	MSigDB_C2	10	4.59231	1.61054	0.00276754	0.00487828	YES	*+/+-	*+/+-		*+/+*	*+/+-	*+/+*	++/+-	*+/**	*+/*-	++/+-	*+/+-
Human Lymphoma_Jenner03_92genes (12925741-Figure9)	GeneSigDB	10	4.56596	1.8893	0.00828097	0.0132564	YES	*+	*+	*+	*+	*+	*+	*+		*+	*+	*+
Human Leukemia_Kang09_352genes (19880498-TableS6)	GeneSigDB	10	4.55252	0.936746	0.00136227	0.00313065	YES	++	*+	*+	*+	*+	*+	++	*+	++		*+
DUTERTRE_ESTRADIOL_RESPONSE_6HR_DN	MSigDB_C2	10	4.55177	0.985796	0.00269374	0.00562741	YES		++/*+	*+/*+	++/*+	++/-+	++/*+	++/*+	+*/*+	**/*+	+*/*+	++/*+
CAGTATT,MIR-200B,MIR-200C,MIR-429	MSigDB_C3	10	4.55077	1.55087	0.00675643	0.0140578	YES	*+	*+	*+		*+	*+	++	*+	*+	-+	*+
KEGG_SULFUR_METABOLISM	MSigDB_C2	10	4.55013	1.21745	0.00912966	0.0129795	YES	*+	*+	*+	*+	*+	*+		*+	*+	*+	*+
Human Breast_Scibetta05_53genes_ad5_down (16024939-Table2)	GeneSigDB	10	4.47247	0.990336	0.00590171	0.0143853	YES	*+	*+	*+	*+	*+	*+	*+		*+	*+	*+
Human Viral_Urosevic07_495genes (17823660-TableS2)	GeneSigDB	10	4.43823	1.68346	0.00494031	0.0092639	YES	*+	++	*+		*+	*+	++	++	*+	*+	*+
CHICAS_RB1_TARGETS_GROWING	MSigDB_C2	10	4.43726	1.42216	0.00283545	0.00575712	YES	*+	*+	*+		*+	*+	++	*+	*+	*+	++
Human Lymphoma_Wright03_44genes (12900505-Figure3)	GeneSigDB	10	4.41019	1.79858	0.00525657	0.00858295	YES	++	++	++	++	++	++	++		++	++	++
Mouse Uterine_Jeong05_634genes (15845616-SuppTable3)	GeneSigDB	10	4.40289	1.47186	0.00461681	0.0102851	YES	*+	*+	*+		-+	*+	++	*+	*+	*+	++
PETROVA_ENDOTHELIUM_LYMPHATIC_VS_BLOOD_DN	MSigDB_C2	10	4.38367	1.58007	0.00598028	0.0116094	YES	*+/++	*+/*+	+*/*+	**/*+	*+/*+	**/*+	*+/*+		*+/*+	*+/*+	++/*+
POOLA_INVASIVE_BREAST_CANCER_UP	MSigDB_C2	10	4.30117	2.00014	0.00630394	0.0124849	YES	*+/**	++/**	++/**	*+/**	*+/**	*+/**	++/*+		*+/**	*+/**	++/**
AMBROSINI_FLAVOPIRIDOL_TREATMENT_TP53	MSigDB_C2	10	4.29649	1.30054	0.00548009	0.0137742	YES	-+	*+	*+	*+	-+		*+	*+	*+	*+	*+
Human Breast_van'tVeer02_2460genes_Ergenes (11823860-SuppTable3)	GeneSigDB	10	4.29412	1.3956	0.00300043	0.00849519	YES	++	++	++	++	++	++	++		++	++	++
Thymic_SP_CD4+Tcell_gt_Blood_CD4+Tcell	SignatureDB	10	4.27994	1.15099	0.00348162	0.00552855	YES	*+	*+		*+	*+	*+	*+	*+	*+	*+	++
BROWNE_HCMV_INFECTION_20HR_DN	MSigDB_C2	10	4.27886	1.39449	0.00589118	0.013409	YES	+*/++	+*/*+	**/*+		*+/*+	**/++	++/*+	**/*+	**/++	+*/*+	**/++
PLASARI_TGFB1_TARGETS_10HR_UP	MSigDB_C2	10	4.26867	1.11794	0.00467962	0.00967945	YES	++/*+	*+/*+	*+/*+	++/*+	*+/-+	*+/*+	*+/*+		++/*+	*+/*+	*+/*+
Human EmbryonicStemCell_Xu09_1311genes (19658189-TableS3)	GeneSigDB	10	4.26656	1.43729	0.00617976	0.0129651	YES	*+	*+	*+	++	-+	*+	*+	*+	*+	*+
Human Lymphoma_Sandeep06_217genes (16760443-SuppTable2)	GeneSigDB	10	4.24021	0.887119	0.00141116	0.00267657	YES	++	++	++	++	++	++	++	++		++	++
Human Colon_Dessein10_211genes (20460542-SuppTable2)	GeneSigDB	10	4.20846	1.24306	0.00251186	0.00424294	YES	++	*+	*+		++	++	++	*+	*+	++	*+
JAATINEN_HEMATOPOIETIC_STEM_CELL_UP	MSigDB_C2	10	4.18144	1.33474	0.00217482	0.00341184	YES	*+/+*	++/++	*+/+*	++/*+	*+/*+	*+/++	++/++		*+/+*	*+/*+	*+/++
Human Breast_Creighton08_2154genes (18757322-TableS1)	GeneSigDB	10	4.15149	1.47552	0.00385181	0.00885978	YES	++	++	*+	*+	++	*+	++		++	++	++
CTTTGA_V$LEF1_Q2	MSigDB_C3	10	4.10034	1.13777	0.00165448	0.0030749	YES	*+	++	*+	*+	*+	*+	*+		*+	*+	*+
Human Breast_Creighton08_772genes (18794137-SuppTable1a)	GeneSigDB	10	4.09234	0.958113	0.00173902	0.00370545	YES	*+	++	*+	++	*+	++	++		*+	*+	++
Human Liver_Skawran08_551genes (18277965-TableS1b)	GeneSigDB	10	4.08244	1.09361	0.00122719	0.00186367	YES	++	++	*+	*+	*+	*+	++		*+	*+	++
Human StemCell_Kumamoto08_2005genes (18451145-TableS1)	GeneSigDB	10	4.08134	1.11687	0.0026975	0.0071664	YES	++	++	*+	++	*+	++	++		*+	*+	*+
Human Leukemia_Sun07_407genes (17571080-SuppTable2a)	GeneSigDB	10	4.08036	1.81702	0.0103871	0.0151106	YES	*+	*+	*+		-+	*+	*+	*+	*+	*+	*+
ELVIDGE_HYPOXIA_UP	MSigDB_C2	10	4.06723	1.66998	0.0109438	0.0173479	YES	*+/+*	*+/+*	*+/**	*+/**	*+/+*	*+/**	*+/+*		*+/**	-+/+*	*+/+*
Human EmbryonicStemCell_Xu09_622genes (19658189-TableS5)	GeneSigDB	10	4.05813	1.09844	0.00530073	0.0111287	YES	*+	*+	*+	*+	-+	*+	*+	*+	*+	*+
Human Leukemia_Pellegrini08_2692genes (18801183-SuppTable1)	GeneSigDB	10	4.04386	1.77886	0.0066787	0.0123653	YES	*+	*+	++		-+	*+	-+	*+	*+	-+	*+
Dendritic_cell_BDCA3pos_blood	SignatureDB	10	4.00693	1.35771	0.00669425	0.00935073	YES	*+	*+		*+	*+	*+	*+	*+	*+	*+	*+
V$POU6F1_01	MSigDB_C3	10	3.98953	1.19464	0.00190953	0.0028262	YES	*+	*+	*+		*+	*+	*+	*+	*+	*+	*+
V$FOXO4_02	MSigDB_C3	10	3.97511	1.35434	0.0034224	0.00617732	YES	*+	*+	*+	*+	-+	*+	*+		*+	*+	*+
HOELZEL_NF1_TARGETS_UP	MSigDB_C2	10	3.95464	1.17496	0.00932888	0.0186571	YES	*+/*+	*+/*+	++/*+	++/**	*+/*+	*+/*+	*+/-+		*+/**	*+/*+	*+/**
TAKEDA_TARGETS_OF_NUP98_HOXA9_FUSION_10D_UP	MSigDB_C2	10	3.93828	0.752923	0.00173854	0.00214938	YES	*+/*-	*+/**	*+/**		*+/**	*+/*+	*+/**	*+/**	*+/**	*+/*+	++/**
Human Colon_Dessein10_744genes (20460542-SuppTable1)	GeneSigDB	10	3.93645	1.31224	0.00746383	0.0131206	YES	++	++	*+		++	++	++	*+	*+	*+	*+
Mouse EmbryonicStemCell_Abranches09_919genes (19621087-Table1e)	GeneSigDB	10	3.93628	1.01353	0.00270865	0.00634602	YES	-+	-+	*+	*+	-+	*+	-+	*+	*+		*+
TONKS_TARGETS_OF_RUNX1_RUNX1T1_FUSION_GRANULOCYTE_DN	MSigDB_C2	10	3.91283	0.83711	0.0114341	0.0150216	YES	**/*+	**/*+		**/*+	*+/*+	*+/*+	*+/*+	**/*+	*+/*+	*+/*+	**/++
Mouse Kidney_Takemoto06_388genes_cat1 (16498405-TableS3)	GeneSigDB	10	3.88195	1.40562	0.00834201	0.0137604	YES	*+	*+	*+		-+	*+	*+	*+	*+	-+	*+
SASSON_RESPONSE_TO_GONADOTROPHINS_DN	MSigDB_C2	10	3.85477	0.945399	0.00310773	0.00285059	YES	**/*+	*+/*+	**/++		*+/*+	**/*+	**/*+	**/*+	**/*+	**/*+	*+/*+
BURTON_ADIPOGENESIS_11	MSigDB_C2	10	3.83766	1.55306	0.0120342	0.0174277	YES	*+	*+	*+	++	*+	*+	++		*+	*+	*+
Human Leukemia_Alcalay05_369genes (15831697-TableS2)	GeneSigDB	10	3.82811	0.981547	0.00555625	0.0123456	YES	*+	++	*+	*+	*+	*+	++		*+	++	*+
Mouse Bone_Boylan07_823genes (17483317-TableS5)	GeneSigDB	10	3.82571	0.53343	0.000622011	0.000613038	YES	++	++	++	++	*+	++	++		++	*+	++
WANG_MLL_TARGETS	MSigDB_C2	10	3.80273	1.48026	0.00955703	0.0174068	YES	*+	*+	*+	*+	*+	*+	*+	*+	*+	*+
MODULE_419	MSigDB_C4	10	3.795	1.11887	0.0101735	0.0108181	YES	*+	*+		*+	*+	*+	*+	*+	*+	*+	*+
Human Leukemia_Haferlach09_500genes (19429869-TableS1)	GeneSigDB	10	3.77909	1.11852	0.00488822	0.00705529	YES	*+	++	*+		*+	*+	++	++	*+	*+	*+
CREIGHTON_ENDOCRINE_THERAPY_RESISTANCE_1	MSigDB_C2	10	3.75846	1.09073	0.00561125	0.0113066	YES	*+	++	*+	++	*+	++	++		*+	*+	++
LI_INDUCED_T_TO_NATURAL_KILLER_DN	MSigDB_C2	10	3.7505	1.4119	0.00857788	0.00843298	YES	*+/*+	++/*+	+*/*+	*+/*+	*+/*+	*+/++	++/*+	**/*+	+*/*+		++/*+
TARTE_PLASMA_CELL_VS_PLASMABLAST_UP	MSigDB_C2	10	3.70336	1.03205	0.00505738	0.0078375	YES	*+/+*	*+/+-	*+/+*		-+/+*	*+/**	*+/+-	*+/+-	*+/+*	-+/+*	*+/+*
Human StemCell_Hao09_359genes (20077526-TableS4)	GeneSigDB	10	3.69837	0.93739	0.00622373	0.0137508	YES		*+	*+	++	*+	++	++	*+	*+	*+	*+
V$FOX_Q2	MSigDB_C3	10	3.69051	0.933644	0.00504844	0.00843903	YES	*+	*+	*+	*+	*+	*+	-+		*+	*+	*+
Mouse StemCell_Fazzio08_2031genes (18614019-TableS4c)	GeneSigDB	10	3.66936	1.28745	0.00481724	0.007191	YES	*+	++	*+	*+	-+	*+	*+		*+	*+	*+
VANHARANTA_UTERINE_FIBROID_DN	MSigDB_C2	10	3.66586	0.907104	0.00890908	0.0130337	YES	*+/*+	*+/*+	*+/*+		*+/*+	*+/*+	*+/*+	**/*+	*+/*+	*+/*+	**/++
Human Uterine_Vanharanta05_79genes (15940248-Table3)	GeneSigDB	10	3.65277	0.852192	0.00861492	0.0123912	YES	*+	*+	*+		*+	*+	*+	*+	*+	*+	++
TAATTA_V$CHX10_01	MSigDB_C3	10	3.63267	1.1439	0.0045406	0.00664242	YES	*+	*+	*+	++	-+	*+	*+	*+	*+	-+
KEGG_REGULATION_OF_ACTIN_CYTOSKELETON	MSigDB_C2	10	3.59135	1.57528	0.0139182	0.0176592	YES	*+	*+	*+		-+	*+	*+	*+	*+	*+	*+
SMIRNOV_RESPONSE_TO_IR_6HR_DN	MSigDB_C2	10	3.58789	1.0799	0.0109455	0.0153764	YES	++/*+	++/++	*+/++		*+/++	*+/++	**/++	**/++	*+/++	*+/++	**/++
KARLSSON_TGFB1_TARGETS_DN	MSigDB_C2	10	3.58623	0.934342	0.0074002	0.0135742	YES	+*/++	+*/*+	**/*+	+*/*+	++/*+	**/*+	+*/++	**/*+	**/*+	++/*+
Human Leukemia_Heuser05_100genes (16266895-Figure1)	GeneSigDB	10	3.57904	1.45964	0.0129729	0.0144468	YES	*+	++	++	*+	*+	*+	++		*+	*+	++
Human Intestine_Jinawath04_1553genes (15273739-SuppTable2)	GeneSigDB	10	3.57416	1.26078	0.00725436	0.00995075	YES	*+	*+	++		*+	*+	*+	*+	*+	*+	*+
PEDERSEN_METASTASIS_BY_ERBB2_ISOFORM_4	MSigDB_C2	10	3.57111	1.18853	0.0131305	0.0179185	YES	*+	*+	*+	*+	*+	*+	*+		*+	*+	*+
TORCHIA_TARGETS_OF_EWSR1_FLI1_FUSION_DN	MSigDB_C2	10	3.54711	1.04361	0.00957258	0.017817	YES	**/++	*+/++	**/++	**/*+	-+/*+	**/++	*+/++		**/++	**/++	*+/++
SMIRNOV_RESPONSE_TO_IR_2HR_DN	MSigDB_C2	10	3.53012	0.916717	0.0123601	0.0172428	YES	**/*+	*+/*+	+*/*+	**/*+	*+/*+	*+/*+	++/*+		**/*+	*+/*+	**/*+
V$HFH1_01	MSigDB_C3	10	3.50986	0.796308	0.00585029	0.00879313	YES	*+	*+	*+	*+	*+	*+	*+		++	*+	*+
Thymic_SP_CD4+Tcell_gt_Thymic_DP_Tcell	SignatureDB	10	3.50106	0.851697	0.00757083	0.00987927	YES	*+	*+		++	*+	*+	++	*+	*+	*+	++
V$NKX25_02	MSigDB_C3	10	3.50095	1.27763	0.00804105	0.00764071	YES	*+	*+	*+		*+	*+	-+	*+	*+	*+	-+
Human Leukemia_Toren05_133genes (16140871-Table1)	GeneSigDB	10	3.49414	0.91593	0.00935568	0.0120325	YES		*+	*+	*+	*+	*+	*+	*+	*+	*+	*+
Human Lung_Coldren06_305genes (16877703-TableS2)	GeneSigDB	10	3.48446	1.32308	0.00961862	0.0132324	YES	*+	*+		*+	-+	*+	-+	-+	*+	*+	*+
TAKEDA_TARGETS_OF_NUP98_HOXA9_FUSION_16D_UP	MSigDB_C2	10	3.47994	0.785106	0.00597375	0.00948986	YES	++/**	++/**		++/**	*+/**	++/*+	++/-*	*+/**	++/*+	*+/*+	++/**
HASLINGER_B_CLL_WITH_CHROMOSOME_12_TRISOMY	MSigDB_C2	10	3.46469	0.767188	0.0129375	0.00797107	YES	*+	*+	*+		*+	*+	*+	*+	*+	*+	*+
BOHN_PRIMARY_IMMUNODEFICIENCY_SYNDROM_DN	MSigDB_C2	10	3.4629	1.06181	0.0159464	0.0175805	YES	**/*+	**/*+	**/*+		**/*+	**/*+	+*/*+	**/*+	**/*+	**/*+	**/*+
MITSIADES_RESPONSE_TO_APLIDIN_UP	MSigDB_C2	10	3.40723	1.3971	0.00872611	0.0107647	YES	*+/**	*+/+*	++/**	*+/**	*+/+*	++/**	++/+*		*+/+*	*+/+*	++/+*
V$SOX9_B1	MSigDB_C3	10	3.40677	0.823192	0.0066547	0.00902	YES	*+	*+	*+	*+	*+	*+	*+		*+	*+	*+
SASSON_RESPONSE_TO_FORSKOLIN_DN	MSigDB_C2	10	3.40512	1.03541	0.00806526	0.00731591	YES	*+/*+	*+/*+	**/*+		*+/*+	*+/*+	**/*+	**/*+	**/*+	**/*+	*+/*+
Human Thyroid_Forberg05_80genes (15757864-Table4)	GeneSigDB	10	3.38274	1.12982	0.0154656	0.0172305	YES	*+	*+	*+	*+	*+		*+	*+	*+	*+	*+
WTGAAAT_UNKNOWN	MSigDB_C3	10	3.34617	1.04014	0.00841709	0.0147135	YES	*+	*+	*+	*+	*+	*+	*+	++	*+	*+
MARTINEZ_RB1_AND_TP53_TARGETS_DN	MSigDB_C2	10	3.23482	1.14507	0.0121645	0.0175203	YES	**/*+	*+/*+	**/*+		*+/*+	**/*+	++/++	+*/*+	**/*+	*+/*+	*+/*+
BOYLAN_MULTIPLE_MYELOMA_PCA1_UP	MSigDB_C2	10	3.18766	0.646061	0.0119755	0.0134221	YES	*+/**	*+/**	*+/**	*+/**		*+/*+	++/*+	*+/**	*+/**	*+/*+	++/**
Human Lung_Agathanggelou03_66genes (14500366-table1)	GeneSigDB	10	3.01258	0.84609	0.0207451	0.0171717	YES	*+	*+	*+		*+	*+	*+	*+	*+	*+	++
Mouse StemCell_Forsberg05_362genes (16151515-TableS3)	GeneSigDB	10	3.01144	0.65682	0.0117812	0.0132692	YES	++	++	++	++	*+	++	++		++	*+	++
CAGCTG_V$AP4_Q5	MSigDB_C3	10	2.84086	0.724118	0.0126805	0.01598	YES	*+	*+	*+	*+	*+	*+	*+	*+	*+		*+
Human Pancreas_Rosero10_1018genes (20860821-TableS5)	GeneSigDB	10	2.70037	0.713167	0.014465	0.0143927	YES	++	++	*+	++	*+	++		*+	*+	++	++
AAAYWAACM_V$HFH4_01	MSigDB_C3	10	2.64318	1.87153	0.0148794	0.0168448	NO	*+	*+	*+	*+	*+	*+	*+	*-	*+	*+
MORF_AATF	MSigDB_C4	10	-2.32875	0.513524	0.0144973	0.0137251	YES	+-		--	*-	+-	*-	+-	*-	*-	+-	+-
Mouse Lymphoma_Wu08_1167genes (18535662-TableS2d)	GeneSigDB	10	-2.83768	0.844837	0.0072591	0.00958102	YES		+-	--	+-	+-	*-	+-	*-	*-	+-	+-
MANALO_HYPOXIA_DN	MSigDB_C2	10	-2.94084	1.03355	0.0103862	0.0144008	YES	*+/+-	-+/+-		**/+-	-+/+-	*+/*-	*+/+-	*+/+-	**/*-	-+/+-	*+/+-
chr19q13	MSigDB_C1	10	-3.22781	1.01115	0.00473401	0.00820885	YES	+-	+-	*-	--	+-	+-	+-	+-	+-	+-
ANASTASSIOU_CANCER_MESENCHYMAL_TRANSITION_SIGNATURE	MSigDB_C2	9	16.1008	4.56997	2.37765e-08	7.13295e-08	YES	-+	-+	*+		-+	*+	-+		*+	-+	*+
Human Ovarian_Bignotti07_126genes_MetsvPrimary_up (17346539-Table2)	GeneSigDB	9	12.8077	3.2266	6.06997e-08	1.82097e-07	YES	*+	-+	*+		-+	-+	*+		*+	-+	*+
TURASHVILI_BREAST_LOBULAR_CARCINOMA_VS_DUCTAL_NORMAL_UP	MSigDB_C2	9	12.7737	3.54155	4.07384e-07	1.22212e-06	YES	*+/**	*+/**	*+/**		*+/**	*+/+*	*+/*+		*+/*+	-+/**	*+/**
VECCHI_GASTRIC_CANCER_ADVANCED_VS_EARLY_UP	MSigDB_C2	9	11.8208	3.79852	7.305e-06	2.19149e-05	YES	*+/**	-+/**	*+/**		-+/-*	*+/*+	*+/-+		*+/**	-+/**	*+/**
FARMER_BREAST_CANCER_CLUSTER_5	MSigDB_C2	9	11.6114	2.28348	2.01561e-06	5.98063e-06	YES	*+	*+	*+		*+	*+	*+		*+	*+	*+
ONDER_CDH1_TARGETS_2_UP	MSigDB_C2	9	11.6019	3.3817	2.7286e-05	8.18579e-05	YES	*+/*+	*+/*+	*+/**		-+/-+	*+/*+	-+/*+		*+/*+	-+/*+	*+/++
Human Prostate_Stanbrough06_89genes (16510604-Table3)	GeneSigDB	9	11.307	3.07691	1.03799e-06	2.8044e-06	YES	-+	-+	*+		-+	*+	*+		*+	-+	*+
Human Breast_Turashvili07_201genes (17389037-Tab5)	GeneSigDB	9	10.0182	2.01592	1.4981e-07	4.4933e-07	YES	*+	*+	*+		*+	++	*+		*+	*+	*+
Human Breast_Taube10_91genes_EMTsignature_up (20713713-TableS1b)	GeneSigDB	9	9.89528	2.74791	8.59728e-05	0.000257747	YES	*+	*+	*+		-+	*+	*+		*+	*+	*+
Human Breast_Kreike07_3712genes_Basal_mets (17910759-TableS5)	GeneSigDB	9	9.66425	2.2267	2.11294e-07	6.33883e-07	YES	++	++	*+		++	*+	++		-+	*+	++
Human Stomach_Zhao09_324genes (19306436-TableS2a)	GeneSigDB	9	9.61234	3.29139	2.11206e-05	6.33617e-05	YES	*+	*+	*+		*+	*+	++		*+	-+	*+
PICCALUGA_ANGIOIMMUNOBLASTIC_LYMPHOMA_UP	MSigDB_C2	9	9.02893	6.06241	0.000848365	0.00250513	NO	-+/*+	-+/*+	*+/+*	*-/*+	-+/*+	-+/+*	*+/++		*+/**	-+/*+
Human Lymphoma_Piccaluga07_260genes (18006812-TableS1)	GeneSigDB	9	8.98609	6.06269	0.000901072	0.00262532	NO	-+	-+	*+	*-	-+	-+	*+		*+	-+
CLASPER_LYMPHATIC_VESSELS_DURING_METASTASIS_DN	MSigDB_C2	9	8.76651	2.60284	0.00301654	0.0090494	YES	**/*+	**/*+	**/*+		**/*+	**/*+	**/*+		**/*+	**/*+	**/*+
LIU_PROSTATE_CANCER_DN	MSigDB_C2	9	8.62591	2.79924	0.00185142	0.00555426	YES	+*/*+	+*/-+	**/*+		**/-+	**/*+	*+/*+	**/*+	**/*+	**/-+
IMMUNE	SHIPP	9	8.06959	3.81895	4.67868e-05	9.27954e-05	YES	++	++	++		++	++	++		++	*+	++
ONDER_CDH1_SIGNALING_VIA_CTNNB1	MSigDB_C2	9	8.04742	1.71617	2.72065e-06	7.22747e-06	YES	*+	*+	*+		-+	*+	*+		*+	*+	*+
Human Breast_Amatschek04_39genes (14871811-Table3)	GeneSigDB	9	8.02043	2.55605	0.00347428	0.0104133	YES	*+	*+	*+		*+	*+	*+		*+	*+	*+
GNF2_PTX3	MSigDB_C4	9	8.01776	2.57221	0.00373457	0.011196	YES	*+	*+	*+		-+	*+	-+	*+	*+	*+
BERENJENO_TRANSFORMED_BY_RHOA_DN	MSigDB_C2	9	7.96774	3.06041	0.00297967	0.00893382	YES	+*/++	+*/*+	**/*+		+*/*+	**/*+	+-/*+		+*/*+	+*/*+	+*/*+
Human Breast_Abba04_52genes_DCIS_v_IDC (15318932-Table3)	GeneSigDB	9	7.90549	2.26382	0.00153414	0.00452451	YES	*+	*+	*+		*+	*+	*+		*+	*+	*+
Human BoneMarrow_Jeong04_47genes (15790779-Table1)	GeneSigDB	9	7.86628	2.9553	0.00540626	0.0159557	YES	*+	-+	*+		-+	*+	-+		*+	*+	*+
KINSEY_TARGETS_OF_EWSR1_FLII_FUSION_DN	MSigDB_C2	9	7.773	2.71691	0.000280854	0.000757627	YES	+*/*+	+*/*+	**/*+		+*/*+	**/*+	+-/*+		+*/*+	+-/*+	+*/++
LINDGREN_BLADDER_CANCER_CLUSTER_2B	MSigDB_C2	9	7.68644	2.65434	0.000246531	0.000557566	YES	++	*+	*+		*+	*+	*+		*+	*+	*+
CNS_Node1661	SignatureDB	9	7.57662	2.2011	3.31416e-05	6.91238e-05	YES	-+	-+	*+		-+	*+	-+		*+	-+	*+
PID_AVB3_INTEGRIN_PATHWAY	MSigDB_C2	9	7.55036	2.75018	0.00171342	0.0051314	YES	*+	*+	*+		*+	*+	*+	*+	*+	*+
Human Breast_Bertucci06_2537genes (16651414-Supp2)	GeneSigDB	9	7.41702	1.71734	7.73913e-06	2.31945e-05	YES	++	++	*+		++	++	++		++	*+	++
MIYAGAWA_TARGETS_OF_EWSR1_ETS_FUSIONS_DN	MSigDB_C2	9	7.40195	2.3171	0.000308641	0.00092556	YES	++/*+	*+/*+	*+/*+		*+/-+	*+/*+	*+/*+	**/*+	*+/*+	-+/*+
Human StemCell_Riggi08_262genes (18381423-SuppTable1a)	GeneSigDB	9	7.38488	2.70402	0.00255747	0.00766047	YES	*+	*+	*+		-+	*+	-+	*+	*+	-+
Human HeadandNeck_Roepman06_429genes (16489042-SuppTable1b)	GeneSigDB	9	7.35831	2.17006	6.36095e-05	0.000186883	YES	*+	*+	*+		*+	*+	*+		*+	*+	*+
RIGGI_EWING_SARCOMA_PROGENITOR_DN	MSigDB_C2	9	7.32381	2.70922	0.0024085	0.00720933	YES	*+/*+	*+/*+	*+/*+		*+/-+	++/*+	*+/-+	*+/*+	*+/*+	*+/*+
Human Breast_Miller07_36genes (17885619-Table3b)	GeneSigDB	9	7.29166	2.93331	0.00243641	0.00690215	YES	*+	*+	*+		*+	*+	*+	*+	*+	*+
Human MesenchymalStemCells_Boeuf08_51genes (18702172-Table3)	GeneSigDB	9	7.0754	3.41783	0.00163328	0.00354853	YES	*+	*+	*+		-+	*+	*+		*+	*+	*+
WOO_LIVER_CANCER_RECURRENCE_UP	MSigDB_C2	9	6.96564	2.24043	0.00130907	0.00389511	YES	*+/**	*+/+-	*+/**		*+/**	*+/**	*+/+*		*+/**	*+/**	*+/**
Human Breast_Miller07_19genes (17885619-Table4b)	GeneSigDB	9	6.68541	1.50292	0.000399299	0.00109881	YES	*+	*+	*+		*+	*+	*+		*+	*+	*+
Mouse Lymphoma_Wu08_1777genes (18535662-TableS2a)	GeneSigDB	9	6.6454	2.01304	0.000223433	0.000599918	YES	++	++	*+		*+	*+	++		*+	*+	++
GU_PDEF_TARGETS_UP	MSigDB_C2	9	6.63231	1.58002	0.000214165	0.000599566	YES	*+/**	*+/**	*+/**		*+/**	*+/**	*+/**		*+/**	*+/**	*+/**
CHIARADONNA_NEOPLASTIC_TRANSFORMATION_KRAS_DN	MSigDB_C2	9	6.50002	2.25796	0.00460979	0.0137428	YES	*+/*+	*+/*+	*+/*+		*+/*+	*+/*+	++/*+		**/*+	*+/*+	*+/*+
Human Uterine_Vanharanta05_737genes (15940248-SuppTable1)	GeneSigDB	9	6.48079	1.51996	0.000469609	0.00137029	YES	*+	*+	*+		*+	*+	*+	*+	*+	*+
DACOSTA_UV_RESPONSE_VIA_ERCC3_DN	MSigDB_C2	9	6.45898	2.17573	0.000323606	0.000830755	YES	+*/++	+*/++	**/++		+*/++	**/++	+-/++		**/++	**/*+	**/++
Human BoneMarrow_Croonquist03_50genes_StromaIL6 (12791645-Table2)	GeneSigDB	9	6.37806	2.31688	0.00500909	0.0141876	YES	*+	*+	*+		*+	*+	*+		*+	*+	*+
WEST_ADRENOCORTICAL_TUMOR_DN	MSigDB_C2	9	6.27247	1.56668	9.89932e-05	0.000281821	YES	+*/*+	+*/*+	**/*+		+*/-+	**/*+	+-/*+		**/*+	+*/*+	**/*+
Human Breast_Desmedt08_68genes_PLAU_Module (18698033-tableS1-PLAU)	GeneSigDB	9	6.23494	2.0651	0.00496496	0.0112877	YES	*+	*+	*+		*+	*+	-+		*+	*+	*+
KRAS_UP	SignatureDB	9	6.23007	2.17418	0.00193308	0.00553267	YES	*+/**	-+/**	*+/**		*+/**	*+/**	*+/**		*+/**	*+/**	*+/**
CROONQUIST_STROMAL_STIMULATION_UP	MSigDB_C2	9	6.2299	2.20428	0.00273709	0.0073213	YES	*+/**	*+/**	*+/*+		*+/**	*+/**	*+/**		*+/**	*+/**	++/**
SWEET_KRAS_TARGETS_UP	MSigDB_C2	9	6.22802	2.18018	0.00193308	0.00553267	YES	*+/**	-+/**	*+/**		*+/**	*+/**	*+/**		*+/**	*+/**	*+/**
Mouse Lung_Rangasamy09_2003genes (19286929-SuppTable1)	GeneSigDB	9	6.22689	2.03737	0.000318662	0.000721735	YES	++	++	++		*+	*+	++		*+	*+	++
TURASHVILI_BREAST_DUCTAL_CARCINOMA_VS_DUCTAL_NORMAL_UP	MSigDB_C2	9	6.22307	2.24061	0.00488636	0.0133497	YES	*+/*+	*+/-*	*+/*+		*+/-+	*+/*+	*+/*+		*+/*+	*+/-+	*+/**
SERVITJA_ISLET_HNF1A_TARGETS_UP	MSigDB_C2	9	6.19621	2.05744	0.000593366	0.00148661	YES	*+/**	*+/**	*+/**		-+/**	*+/**	*+/**	*+/**	*+/**	-+/-*
NAKAMURA_ADIPOGENESIS_EARLY_DN	MSigDB_C2	9	6.17126	1.90828	0.000684644	0.00158169	YES	**/*+	++/*+	**/*+		*+/*+	**/*+	*+/*+		**/*+	*+/*+	**/++
ROY_WOUND_BLOOD_VESSEL_UP	MSigDB_C2	9	6.14434	1.44216	0.000548703	0.00106428	YES	*+/**	*+/**	*+/**		-+/**	*+/+*	*+/**		*+/**	*+/**	*+/**
CAIRO_LIVER_DEVELOPMENT_UP	MSigDB_C2	9	6.13659	2.06917	0.00358885	0.0106485	YES	*+/+*	*+/**	*+/**		*+/**	*+/**	*+/**		*+/**	*+/**	*+/+*
Human Lymphoma_Germinal07_44genes (19455257-TableS9)	GeneSigDB	9	6.11614	0.764708	7.88944e-05	0.00017868	YES	++	++		*+	*+	*+	++		*+	*+	++
RODWELL_AGING_KIDNEY_NO_BLOOD_UP	MSigDB_C2	9	6.11196	1.82388	0.00232243	0.00691443	YES	*+/**	*+/++	*+/**		*+/*+	*+/**	*+/++	*+/**	*+/*+	*+/**
Human Lymphoma_Germinal07_77genes (19455257-TableS8)	GeneSigDB	9	6.10243	0.765136	7.88944e-05	0.00017868	YES	++	++		*+	*+	*+	++		*+	*+	++
KEGG_FOCAL_ADHESION	MSigDB_C2	9	6.09689	2.21738	0.003164	0.00917303	YES	*+	*+	*+		*+	*+	*+		*+	*+	*+
Rat Brain_Greco09_425genes (19305503-TableS1)	GeneSigDB	9	5.9949	1.65344	0.000248059	0.000689506	YES	++	*+	*+		*+	*+	*+		*+	*+	*+
LIM_MAMMARY_LUMINAL_MATURE_DN	MSigDB_C2	9	5.97803	2.28613	0.00704773	0.0153813	YES	**/*+	**/*+	**/*+		**/*+	**/*+	**/*+	**/*+	**/*+	**/*+
LIEN_BREAST_CARCINOMA_METAPLASTIC	MSigDB_C2	9	5.9688	1.76497	0.00329938	0.00962719	YES	*+	*+	*+		*+	*+	*+	*+	*+	*+
Human Breast_Sotiriou03_706genes (12917485-Table8)	GeneSigDB	9	5.96222	1.92329	0.000318305	0.000915308	YES	*+	++	*+		*+	*+	++		*+	*+	*+
Human Intestine_Vecchi07_40genes (17297478-Table1)	GeneSigDB	9	5.88499	2.12189	0.00219516	0.00331306	YES	-+	-+	*+		*+	*+	*+		*+	*+	*+
Human Bladder_Blaveri05_25genes (15930339-Table2)	GeneSigDB	9	5.87744	2.24431	0.00272663	0.00456184	YES	*+	*+	*+		*+	*+	*+		*+	*+	*+
THUM_MIR21_TARGETS_HEART_DISEASE_UP	MSigDB_C2	9	5.85391	2.46362	0.00588075	0.0120847	YES	*+/**	*+/**	*+/**		*+/**	*+/**	*+/**		*+/**	*+/**	*+/**
TGGAAA_V$NFAT_Q4_01	MSigDB_C3	9	5.81529	1.26368	4.5483e-05	0.000113829	YES	*+	*+	*+		*+	*+	*+		*+	*+	*+
ROZANOV_MMP14_TARGETS_SUBSET	MSigDB_C2	9	5.68907	2.59764	0.0090989	0.015874	YES	*+	*+	*+		*+	*+	*+	*+	*+	*+
Mouse InnerEar_Sajan08_2724genes (17660535-TableS4c)	GeneSigDB	9	5.68661	1.44473	1.8368e-05	3.47758e-05	YES	++	++	*+		*+	*+	++		++	*+	*+
WILCOX_PRESPONSE_TO_ROGESTERONE_DN	MSigDB_C2	9	5.68655	1.72457	0.0036684	0.0106971	YES	**/*+	+*/-+	**/*+		**/-+	-*/*+	+*/*+	**/*+	*-/*+	**/*+
BLALOCK_ALZHEIMERS_DISEASE_UP	MSigDB_C2	9	5.65435	2.30375	0.00425719	0.010559	YES	++/++	++/++	*+/**		*+/++	*+/*+	++/+*		*+/**	*+/*+	++/*+
DAVICIONI_MOLECULAR_ARMS_VS_ERMS_DN	MSigDB_C2	9	5.55138	2.47856	0.00293978	0.00729681	YES	*+/*+	*+/*+	**/*+		*+/*+	*+/-+	*+/-+	**/*+	**/*+	**/*+
IGLESIAS_E2F_TARGETS_UP	MSigDB_C2	9	5.54238	2.10014	0.00260201	0.00623662	YES	*+/**	*+/**	-+/**		-+/**	*+/**	*+/**		*+/**	*+/**	*+/**
Human Leukemia_Li09_419genes (19755675-TableS6)	GeneSigDB	9	5.48332	1.8366	0.00326725	0.00923852	YES	++	++		*+	*+	*+	++		*+	++	++
Human Sarcoma_Mason04_549genes (15489886-TableS1b)	GeneSigDB	9	5.48	1.45259	0.00121458	0.00357906	YES	*+	*+	*+		*+	*+	++		*+	*+	*+
MANALO_HYPOXIA_UP	MSigDB_C2	9	5.47886	1.98124	0.00615406	0.0144101	YES	*+/+-	-+/+-	*+/**		-+/+-	*+/*-	*+/+-	*+/+-		-+/+-	*+/+-
Human Embryo_Heim07_1650genes (17880687-TableS1)	GeneSigDB	9	5.47749	1.66711	0.000174522	0.000341019	YES	++	++	*+		*+	++	++		*+	*+	++
CROONQUIST_NRAS_VS_STROMAL_STIMULATION_DN	MSigDB_C2	9	5.47381	1.21925	0.00029293	0.000633134	YES	**/*+	**/*+	**/*+		**/*+	**/*+	+*/++		**/*+	**/*+	+*/*+
HIF1alpha_1.5x_UP	SignatureDB	9	5.47309	2.07712	0.00690928	0.0138577	YES	*+/+-	-+/+-	-+/**		-+/+-	*+/*-	*+/+-	*+/+-		-+/+-	*+/+*
Human Breast_Yang08_840genes (18794102-TableS1)	GeneSigDB	9	5.47239	2.17939	0.00498018	0.0130934	YES	*+	*+	*+		*+	*+	*+		++	*+	*+
Human Pancreas_Nakamura07_1222genes (17699763-SuppTable1)	GeneSigDB	9	5.46833	2.00745	0.00213296	0.00620919	YES	++	++	*+		*+	*+	++		*+	*+	*+
Human StemCell_Skottman06_82genes (16100004-Table3)	GeneSigDB	9	5.45569	2.1515	0.0061645	0.0118665	YES	*+	-+	*+		*+	*+	-+		*+	*+	*+
Human BoneMarrow_Croonquist03_49genes (12791645-Table4)	GeneSigDB	9	5.45133	1.50083	0.00123431	0.00265063	YES	*+	*+	*+		*+	*+	*+		*+	*+	++
RUTELLA_RESPONSE_TO_HGF_VS_CSF2RB_AND_IL4_DN	MSigDB_C2	9	5.43836	1.83972	0.00351417	0.0101631	YES	++/++	+*/++		+*/++	++/*+	*+/++	++/++		**/*+	*+/*+	++/++
Human Ovarian_Spentzos04_115genes (15505275-SuppTable4)	GeneSigDB	9	5.40534	1.38305	0.00447948	0.0131501	YES	*+	*+	*+		*+	*+	*+		*+	-+	*+
MCBRYAN_PUBERTAL_TGFB1_TARGETS_UP	MSigDB_C2	9	5.3573	1.82878	0.00245767	0.0058704	YES	*+/**	*+/**	*+/**		*+/**	*+/**	++/*+	*+/**	*+/**	*+/**
PAPASPYRIDONOS_UNSTABLE_ATEROSCLEROTIC_PLAQUE_DN	MSigDB_C2	9	5.34391	2.25384	0.00515741	0.00940846	YES	**/*+	**/*+	**/*+		**/*+	*+/*+	+*/*+		*+/*+	*+/*+	**/*+
GRUETZMANN_PANCREATIC_CANCER_UP	MSigDB_C2	9	5.28835	2.29451	0.00431573	0.00911546	YES	*+/+*	*+/+*	*+/**		*+/**	*+/**	++/+*		*+/**	*+/+*	*+/+*
Human StemCell_Coller06_136genes (16509772-TableS1)	GeneSigDB	9	5.20871	2.10888	0.00464641	0.00945297	YES	*+	*+	*+		-+	*+	-+	*+	*+	-+
NAKAMURA_ADIPOGENESIS_LATE_DN	MSigDB_C2	9	5.18494	1.82584	0.00446979	0.0102905	YES	**/*+	*+/*+	**/*+		*+/*+	**/*+	*+/*+		**/*+	**/*+	**/++
Human StemCell_Hao09_612genes (20077526-TableS3)	GeneSigDB	9	5.11681	1.13959	0.000749267	0.00211645	YES	++	++	++		++	++	++		*+	*+	++
KIM_WT1_TARGETS_12HR_UP	MSigDB_C2	9	5.10681	1.45402	0.00146225	0.0036352	YES	*+/+*	*+/++	*+/*+		-+/++	*+/**	*+/++	*+/**	*+/**	*+/*+
BERENJENO_ROCK_SIGNALING_NOT_VIA_RHOA_DN	MSigDB_C2	9	5.0308	1.68472	0.00282784	0.00590181	YES	**/*+	**/*+	**/*+		**/*+	**/*+	**/*+		**/*+	**/*+	**/*+
VERRECCHIA_RESPONSE_TO_TGFB1_C2	MSigDB_C2	9	5.01619	1.56511	0.0064658	0.0106304	YES	*+	*+	*+		*+	*+	*+		*+	*+	*+
ONKEN_UVEAL_MELANOMA_UP	MSigDB_C2	9	5.01439	0.989082	0.000221994	0.000604043	YES	++/+*	++/++	++/**		*+/++	*+/++	++/++		++/*+	*+/++	++/++
LANDIS_BREAST_CANCER_PROGRESSION_DN	MSigDB_C2	9	4.99098	1.88078	0.00516766	0.00887536	YES	**/*+	*+/*+	**/*+		**/*+	**/*+	**/*+	**/*+	**/*+	*+/*+
HUMMEL_BURKITTS_LYMPHOMA_UP	MSigDB_C2	9	4.98837	1.17071	0.00146115	0.00205381	YES	*+/+*	*+/+*	*+/+*	*+/+*	*+/+*	*+/+*	*+/+*	*+/**	*+/+*
Human StemCell_Wagner05_32genes (16263424-Table2)	GeneSigDB	9	4.97731	1.6078	0.00617396	0.011133	YES	*+	*+	*+		*+	*+	*+	*+	*+	*+
Human Pancreas_Nakamura04_261genes (14767473-SuppTable1)	GeneSigDB	9	4.95325	1.53532	0.00313461	0.00909697	YES	*+	*+	*+		*+	*+	++		*+	*+	*+
Human StemCell_Moreno04_101genes (15466190-TableS3)	GeneSigDB	9	4.92351	1.49217	0.00195199	0.00288821	YES	*+	*+	*+		*+	*+	*+		*+	-+	*+
Human Breast_Turashvili07_326genes (17389037-Tab2)	GeneSigDB	9	4.90204	1.49878	0.00400714	0.0112801	YES	*+	*+	*+		*+	*+	*+	*+	*+	-+
BROWNE_HCMV_INFECTION_48HR_DN	MSigDB_C2	9	4.89414	2.14956	0.00345251	0.00676973	YES	++/*+	+*/-+	**/-+		+*/-+	**/-+	+*/-+		+*/*+	**/-+	**/*+
PETRETTO_CARDIAC_HYPERTROPHY	MSigDB_C2	9	4.89359	1.13673	0.00318826	0.00761291	YES	*+	*+	*+		-+	*+	*+		*+	*+	*+
RB_P107_DN.V1_UP	MSigDB_C6	9	4.87816	1.13064	0.000423567	0.00066544	YES	*+/+*	*+/**	-+/**		*+/**	*+/**	*+/**	*+/**	*+/*-	*+/**
HORIUCHI_WTAP_TARGETS_UP	MSigDB_C2	9	4.86014	1.49354	0.00250496	0.00503585	YES	++/**	*+/**	*+/**	++/**	*+/**		*+/+-		*+/**	*+/**	*+/+*
DANG_REGULATED_BY_MYC_DN	MSigDB_C2	9	4.83847	2.05339	0.00658244	0.0138918	YES	+*/*+	+*/*+	**/*+		+*/*+	**/*+	+-/*+		**/*+	+-/*+	+*/*+
Mouse Skin_Schlingemann03_31 (12640676-Table4)	GeneSigDB	9	4.83496	1.11952	0.00311107	0.00668083	YES	*+	*+	*+	*+	*+	*+	*+		*+	*+
CTTTGT_V$LEF1_Q2	MSigDB_C3	9	4.82228	1.59757	0.00294507	0.00777051	YES	++	*+	*+	++	*+	*+	*+		++	*+
Mouse InnerEar_Sajan08_5223genes (17660535-TableS4a)	GeneSigDB	9	4.81761	1.64462	0.000365601	0.000818303	YES	++	++	++		++	++	++		*+	++	++
TONKS_TARGETS_OF_RUNX1_RUNX1T1_FUSION_HSC_UP	MSigDB_C2	9	4.78972	1.23301	0.00219861	0.00444695	YES	++/+*	++/++	*+/+*		*+/*+	++/*+	++/++		*+/**	*+/*+	*+/+*
Human StemCell_Menicanin09_16genes (19224407-Table3)	GeneSigDB	9	4.78931	1.04017	0.00521305	0.00827698	YES	*+	*+	*+		*+	*+	*+	*+	*+	*+
AMUNDSON_POOR_SURVIVAL_AFTER_GAMMA_RADIATION_8G	MSigDB_C2	9	4.77486	1.63693	0.0051956	0.0104732	YES	*+	*+	*+		*+	*+	*+		*+	*+	++
LU_TUMOR_ENDOTHELIAL_MARKERS_UP	MSigDB_C2	9	4.7685	1.47448	0.00295126	0.00324613	YES	*+/*+	*+/**	*+/**		*+/**	*+/**	*+/**		*+/**	*+/**	*+/**
REACTOME_AXON_GUIDANCE	MSigDB_C2	9	4.7668	1.89164	0.00564359	0.0141432	YES	*+	*+	*+		*+	*+	*+	++	*+	*+
Human Breast_Creighton08_584genes (18757322-TableS3)	GeneSigDB	9	4.7433	2.42143	0.00716643	0.0161772	YES		*+		*+	*+	*+	++	*+	*+	*+	++
Human StemCell_Moreno04_205genes (15466190-TableS2)	GeneSigDB	9	4.73812	1.56916	0.00333329	0.00627236	YES	*+	*+	*+		*+	*+	*+		++	*+	++
Mouse StemCell_Si06_35genes (16581771-table1)	GeneSigDB	9	4.73309	1.51296	0.00678484	0.0102724	YES	*+	*+	*+		*+	*+	*+		*+	*+	*+
Mouse InnerEar_Sajan08_109genes (17660535-TableS7)	GeneSigDB	9	4.72189	1.81706	0.00325027	0.00551636	YES	*+	*+	*+		*+	*+	*+	*+	*+	*+
Human Breast_Samoszuk05_13genes_MyofibroblastGenes (15987422-Table2)	GeneSigDB	9	4.70582	1.10439	0.00823943	0.0119891	YES	*+	*+	*+		*+	*+	*+		*+	*+	*+
Human Breast_Amin06_82genes_StromaInteractions (16735089-Table1)	GeneSigDB	9	4.69718	1.91625	0.00215378	0.00263916	YES	*+	*+	*+		-+	*+	*+	*+	*+	*+
Rat Breast_Blakely06_45genes_down_parousRats (16778221-Table2)	GeneSigDB	9	4.68077	1.43966	0.00580773	0.011554	YES	*+	*+	*+		-+	*+	*+		*+	*+	*+
Human StemCell_Medjkane04_51genes (15150092-Table2)	GeneSigDB	9	4.67769	1.61331	0.00561841	0.0100098	YES	*+	*+	*+		*+	*+	*+		*+	*+	*+
Human Lymphoma_Hummel06_50genes (16760442-SuppTable5-1)	GeneSigDB	9	4.65606	1.04191	0.00217864	0.00289516	YES	*+	*+	*+	*+	*+	*+	*+	*+	*+
HAN_SATB1_TARGETS_DN	MSigDB_C2	9	4.6268	1.62561	0.00296037	0.00766313	YES	*+/*+	*+/*+			*+/*+	*+/*+	*+/*+	**/-+	*+/*+	*+/*+	*+/++
TGGTGCT,MIR-29A,MIR-29B,MIR-29C	MSigDB_C3	9	4.58416	1.13963	0.00379895	0.0112271	YES	*+	*+	*+	*+	*+	++	++		*+	*+
VERRECCHIA_EARLY_RESPONSE_TO_TGFB1	MSigDB_C2	9	4.58282	1.58263	0.00860019	0.0155116	YES	*+	*+	*+		*+	*+	*+		*+	*+	*+
DELACROIX_RARG_BOUND_MEF	MSigDB_C2	9	4.56519	2.08018	0.00468464	0.00927987	YES	*+	*+	*+		-+	*+	*+	*+	*+	*+
Mouse InnerEar_Sajan08_2230genes (17660535-TableS4b)	GeneSigDB	9	4.55561	1.66687	0.00103927	0.00139583	YES	++	++	*+		++	++	++		++	++	++
KRIGE_RESPONSE_TO_TOSEDOSTAT_24HR_UP	MSigDB_C2	9	4.54287	1.44233	0.00131861	0.00244506	YES	++/+-	++/+-		++/+-	*+/+*	++/+*	++/+-		++/+*	*+/+*	++/+*
Mouse Testicular_Denolet06_342genes (16166195-TableS1b)	GeneSigDB	9	4.5031	1.18639	0.0011767	0.00169423	YES	++	*+	*+		*+	*+	*+		*+	*+	*+
MCBRYAN_PUBERTAL_BREAST_4_5WK_UP	MSigDB_C2	9	4.50159	1.03529	0.000554194	0.000876442	YES	*+/+*	-+/+*	*+/+*		-+/*+	*+/**	*+/+*	*+/**	*+/**	*+/**
KIM_WT1_TARGETS_UP	MSigDB_C2	9	4.47515	1.32755	0.00167805	0.0024212	YES	++/*+	*+/*+	*+/**		++/++	++/**	*+/+*		++/**	*+/++	++/+*
LANDIS_ERBB2_BREAST_TUMORS_324_DN	MSigDB_C2	9	4.46476	1.75609	0.0072678	0.0112909	YES	++/*+	++/*+	**/*+		*+/*+	*+/*+	*+/*+	**/*+	**/*+	*+/*+
Human Leukemia_Mullighan07_838genes (17597811-SuppTable6)	GeneSigDB	9	4.46057	1.33921	0.00507637	0.0147366	YES	++	++			++	++	++	*+	++	++	++
Human Lung_Rohrbeck08_35genes_SquamousCell (18992152-table3)	GeneSigDB	9	4.45768	0.789423	0.0031669	0.00553787	YES	*+	*+	*+		*+	*+	++		*+	*+	*+
Human Leukemia_Sun07_90genes (17571080-SuppTable2c)	GeneSigDB	9	4.45441	1.43312	0.00602828	0.0118984	YES	*+	*+	*+		*+	*+	*+		*+	*+	*+
GOTZMANN_EPITHELIAL_TO_MESENCHYMAL_TRANSITION_UP	MSigDB_C2	9	4.45292	1.55837	0.00625645	0.0113851	YES	-+/**	*+/**	*+/**		*+/*+	*+/**	*+/+*		*+/**	*+/**	*+/**
KONDO_EZH2_TARGETS	MSigDB_C2	9	4.4463	1.33496	0.00401964	0.0104244	YES	*+	*+	*+		-+	*+	*+		*+	*+	*+
SCHLINGEMANN_SKIN_CARCINOGENESIS_TPA_DN	MSigDB_C2	9	4.43113	1.06307	0.00462551	0.00903456	YES	+*/*+	+*/*+	**/*+	**/*+	**/*+	**/*+	+*/*+		+*/*+	+*/*+
NUYTTEN_EZH2_TARGETS_UP	MSigDB_C2	9	4.42297	2.10498	0.01028	0.0167826	YES	++/++	++/+*	++/**		*+/+*	++/**	++/+*		*+/++	*+/+*	++/**
Mouse StemCell_Chambers07_1667genes (17676974-TableS1)	GeneSigDB	9	4.40186	1.89159	0.00334225	0.00507706	YES	++	++		++	++	++	++		++	*+	++
WESTON_VEGFA_TARGETS	MSigDB_C2	9	4.3918	1.21456	0.00325596	0.00538062	YES	*+	*+	*+		-+	*+	*+	*+		*+	*+
FLECHNER_BIOPSY_KIDNEY_TRANSPLANT_OK_VS_DONOR_UP	MSigDB_C2	9	4.38308	1.33744	0.00105675	0.00184799	YES	++/**	++/**	++/**		++/**	*+/**	++/**		*+/**	*+/**	++/**
GTGCCTT,MIR-506	MSigDB_C3	9	4.37772	1.32163	0.00410401	0.0112948	YES	++	*+	*+		*+	*+	++		*+	*+	*+
MODULE_38	MSigDB_C4	9	4.37213	1.58026	0.00572361	0.0119592	YES	*+	*+	*+		*+	*+	*+	*+	*+	*+
ZHAN_MULTIPLE_MYELOMA_MF_DN	MSigDB_C2	9	4.372	1.02647	0.00504638	0.00581975	YES	**/*+	**/++	**/++		**/*+		*+/*+	**/*+	**/++	*+/*+	**/++
Myeloma_MF_subgroup_DN	SignatureDB	9	4.36637	1.17798	0.00591087	0.00668737	YES	**/*+	**/*+	**/++		**/*+		*+/*+	**/*+	**/*+	*+/*+	**/++
GTGCCAT,MIR-183	MSigDB_C3	9	4.36336	1.25729	0.0035184	0.00675911	YES	*+	*+	++	*+	*+		*+		*+	*+	*+
Human StemCell_Moreno05_297genes (16288009-SuppTable2)	GeneSigDB	9	4.35589	1.31063	0.002244	0.00366893	YES	*+	*+			*+	*+	*+	*+	*+	*+	*+
CERVERA_SDHB_TARGETS_1_UP	MSigDB_C2	9	4.34114	0.903022	0.00187279	0.00251865	YES	*+/**	*+/**	*+/**		*+/**	*+/**	-+/**	*+/**	*+/**	*+/**
V$OCT1_02	MSigDB_C3	9	4.33159	1.98976	0.0134874	0.0209853	YES	*+	*+	*+		*+	*+	*+	++	*+	*+
MONNIER_POSTRADIATION_TUMOR_ESCAPE_DN	MSigDB_C2	9	4.29659	1.64491	0.00464029	0.0108765	YES	+*/++	++/++		+*/*+	++/*+	++/*+	++/++		+*/*+	+*/*+	++/*+
Human Breast_Vincent-Salomon08_1001genes (18381933-SuppTableS4)	GeneSigDB	9	4.27129	1.76378	0.00228784	0.00329997	YES	++	*+	*+		*+	*+	++		*+	*+	*+
Human Ovarian_Park08_77genes (18714397-TableW1)	GeneSigDB	9	4.27083	0.979927	0.00186306	0.00174338	YES	*+	*+	*+		*+	*+	*+	*+	*+	*+
ZWANG_CLASS_1_TRANSIENTLY_INDUCED_BY_EGF	MSigDB_C2	9	4.26562	1.29479	0.00323152	0.00612018	YES	++	++	++		++	++	++		*+	*+	++
Human StemCell_Moreno04_62genes (15466190-Table1)	GeneSigDB	9	4.26294	1.44877	0.00834755	0.0157944	YES	*+	*+	*+		*+	*+	*+		*+	*+	*+
ZHAN_LATE_DIFFERENTIATION_GENES_DN	MSigDB_C2	9	4.26252	1.66943	0.0145092	0.0137541	YES	+*/*+	**/*+	**/*+	**/*+			**/++	**/*+	**/*+	**/*+	+*/*+
MODULE_11	MSigDB_C4	9	4.25718	1.74802	0.00541	0.00998007	YES	*+	-+	*+	*+	*+	*+	*+			*+	*+
Human Immune_Allen10_162genes (20220088-SuppTable2)	GeneSigDB	9	4.25554	1.94058	0.010022	0.015231	YES	*+	*+			-+	*+	*+	*+	*+	-+	*+
PEREZ_TP53_TARGETS	MSigDB_C2	9	4.24356	2.04393	0.00753593	0.0158534	YES	*+	*+	++	++	*+	++	*+			*+	++
ELVIDGE_HYPOXIA_BY_DMOG_UP	MSigDB_C2	9	4.22391	1.29159	0.005667	0.0109146	YES		*+/**	*+/**	*+/**	*+/**	*+/**	*+/**		*+/**	-+/**	*+/**
Mouse Kidney_Takemoto06_733genes (16498405-TableS10)	GeneSigDB	9	4.20376	1.67262	0.0064694	0.0163826	YES	++	*+	*+		*+	*+	++		*+	*+	*+
E2F1_UP.V1_DN	MSigDB_C6	9	4.17142	1.75217	0.00846452	0.0118249	YES	+*/*+	+*/*+	**/*+		+*/*+	*-/*+	+*/*+	+*/*+		**/*+	**/*+
ZWANG_TRANSIENTLY_UP_BY_1ST_EGF_PULSE_ONLY	MSigDB_C2	9	4.16263	1.55939	0.00482028	0.00990054	YES	*+	*+	++		-+	++	*+		*+	*+	*+
THUM_SYSTOLIC_HEART_FAILURE_DN	MSigDB_C2	9	4.13789	1.13742	0.0035652	0.00690422	YES	+*/*+	++/*+	++/*+		*+/*+	*+/++	++/++	**/*+	++/*+		++/*+
TGGNNNNNNKCCAR_UNKNOWN	MSigDB_C3	9	4.13056	1.6488	0.00561095	0.00837593	YES	*+	*+	*+	*+	*+	-+	-+	*+		*+
Human Bladder_Ying-Hao02_30genes (12644218-Table1)	GeneSigDB	9	4.12964	0.817649	0.0052844	0.00589587	YES	*+	*+	*+		*+	*+	*+	*+		*+	*+
PHONG_TNF_RESPONSE_VIA_P38_PARTIAL	MSigDB_C2	9	4.11443	1.48208	0.0101179	0.0151575	YES	++	++		*+	*+	*+	++		*+	*+	++
Human Leukemia_Whitney09_50genes_51-100UpRegulated (18637760-SuppTable2)	GeneSigDB	9	4.10862	0.965154	0.00531365	0.00691692	YES	*+	-+			*+	*+	-+	*+	*+	*+	*+
Human Leukemia_Murati09_1686genes (18818702-SuppTable2)	GeneSigDB	9	4.10144	1.56399	0.00834259	0.0159895	YES	++	++		++	++	*+	++		++	*+	++
Mouse Leukemia_Torchia07_928genes (17875932-TableS4)	GeneSigDB	9	4.08884	1.03267	0.00363746	0.00984717	YES	++	++		++	*+	++	*+		*+	*+	*+
KLEIN_PRIMARY_EFFUSION_LYMPHOMA_DN	MSigDB_C2	9	4.08101	1.68282	0.009063	0.0102055	YES	**/*+	**/*+	**/*+	**/*+	+*/*+	**/++	+*/++		**/*+		**/*+
Human Breast_Itoh05_92genes (15831674-Table2)	GeneSigDB	9	4.0761	1.13473	0.00665046	0.00967827	YES	*+	*+	*+	*+	*+	*+	*+			*+	*+
ANATOMICAL_STRUCTURE_DEVELOPMENT	MSigDB_C5	9	4.05857	1.87189	0.00655669	0.012269	YES	-+	-+	*+		-+	-+	-+	*+	*+		-+
YTATTTTNR_V$MEF2_02	MSigDB_C3	9	4.05674	1.27935	0.00462756	0.0104113	YES	*+	*+	*+		*+	*+	*+		*+	*+	*+
TGTTTAC,MIR-30A-5P,MIR-30C,MIR-30D,MIR-30B,MIR-30E-5P	MSigDB_C3	9	4.04136	1.30978	0.00332224	0.00489679	YES	++	*+	++		*+	*+	++		++	*+	++
Human Breast_Teschendorff07_813genes_ERneg (17683518-813GeneTable)	GeneSigDB	9	4.04045	1.07956	0.00222953	0.00375431	YES	++	++	*+		++	*+	++		*+	*+	++
NAKAMURA_TUMOR_ZONE_PERIPHERAL_VS_CENTRAL_UP	MSigDB_C2	9	4.02914	0.629622	0.00171069	0.00423203	YES	*+/++	++/*+	*+/**		*+/*+	*+/*+	++/++		*+/*+	*+/*+	*+/+*
PANGAS_TUMOR_SUPPRESSION_BY_SMAD1_AND_SMAD5_UP	MSigDB_C2	9	4.01566	1.33857	0.00469221	0.00796206	YES	++/+*	++/++	*+/**		*+/**	*+/**	*+/+*	*+/**	*+/**	*+/**
WU_SILENCED_BY_METHYLATION_IN_BLADDER_CANCER	MSigDB_C2	9	4.01199	1.29325	0.00773653	0.0130993	YES	-+	-+	*+		-+	*+	*+	*+	*+	*+
Mouse StemCell_Si06_109genes (16581771-tableS1b)	GeneSigDB	9	3.99629	1.07941	0.00373244	0.00449473	YES	*+	*+	*+		*+	*+	*+	*+		*+	*+
Human Leukemia_Takeda06_475genes (16818636-TableS3)	GeneSigDB	9	3.98071	1.67308	0.00615047	0.00828516	YES	*+		*+		-+	*+	*+	*+	*+	-+	*+
Human Lung_Ma08_708genes (18440302-SuppTable2)	GeneSigDB	9	3.97043	1.14011	0.00246064	0.00400367	YES	++	++	++		++	*+	++		*+	*+	++
Human Pancreas_Cavard09_736genes (19235837-TableS2a)	GeneSigDB	9	3.96168	1.46805	0.00801244	0.0144583	YES	++	++	*+	++	++	*+	++		*+	*+
Human EmbryonicStemCell_Xu09_1801genes (19658189-TableS4)	GeneSigDB	9	3.95011	1.32711	0.00299715	0.00598847	YES	*+	*+	*+		-+	*+	*+	*+	++	*+
ODONNELL_TARGETS_OF_MYC_AND_TFRC_UP	MSigDB_C2	9	3.94615	1.01487	0.00361614	0.004027	YES	*+/**	*+/+*		++/**	*+/**	++/**	++/+-		++/**	*+/+*	++/**
LU_TUMOR_VASCULATURE_UP	MSigDB_C2	9	3.93415	1.2873	0.00830707	0.00728075	YES	*+/**	*+/**	*+/**		*+/**	*+/**	*+/**		*+/**	*+/*+	*+/**
ONDER_CDH1_TARGETS_2_DN	MSigDB_C2	9	3.93346	1.10022	0.00233871	0.00276103	YES	*+/*+	*+/*+			-+/-+	*+/*+	-+/*+	**/*+	*+/*+	-+/*+	*+/++
CHICAS_RB1_TARGETS_SENESCENT	MSigDB_C2	9	3.90091	1.49985	0.00690407	0.00994943	YES	++	++	++		*+	*+	++		*+	*+	++
UDAYAKUMAR_MED1_TARGETS_DN	MSigDB_C2	9	3.89993	1.39885	0.00938412	0.017244	YES	+*/*+	+*/*+	**/*+		+*/*+	**/*+	+*/*+		+*/*+	+*/*+	+*/*+
Mouse Testicular_Cederroth07_170genes (17673513-TableS1)	GeneSigDB	9	3.89636	0.965173	0.0057976	0.0102518	YES	*+	-+	*+		-+	*+	-+	*+	*+		*+
TGAATGT,MIR-181A,MIR-181B,MIR-181C,MIR-181D	MSigDB_C3	9	3.89248	1.41619	0.00512972	0.00700966	YES	*+	++	++		*+	++	++		*+	*+	++
Human Viral_Klein03_67genes (12531789-TableS1b)	GeneSigDB	9	3.88636	1.60094	0.0103948	0.0121177	YES	*+	*+	*+	*+	*+	*+	++		*+		*+
RHEIN_ALL_GLUCOCORTICOID_THERAPY_UP	MSigDB_C2	9	3.87285	1.25645	0.00761196	0.0116951	YES	++/++	*+/++		*+/**	*+/+*	++/**	*+/+*		++/**	*+/*+	++/+*
KOKKINAKIS_METHIONINE_DEPRIVATION_96HR_UP	MSigDB_C2	9	3.86879	1.24608	0.00914733	0.012543	YES	++/**	*+/**	*+/**	*+/**	*+/**	*+/*+	++/**			*+/+*	*+/**
Blood_Module-1.3_B_cells	SignatureDB	9	3.86771	1.13697	0.00877467	0.0114337	YES	++	++	++	++	++		++	++	++		++
TGACATY_UNKNOWN	MSigDB_C3	9	3.86023	1.23404	0.00455844	0.0073088	YES	++	++	++		*+	++	*+		++	*+	*+
ZHANG_RESPONSE_TO_IKK_INHIBITOR_AND_TNF_UP	MSigDB_C2	9	3.85838	1.74915	0.00954671	0.0131955	YES	*+/**	*+/**		*+/**	*+/**	++/**	*+/++	*+/**		*+/**	++/**
Human Lymphoma_VanLoo09_135genes (19797726-SuppTable1a)	GeneSigDB	9	3.83305	1.30543	0.00916209	0.0137617	YES	*+	*+	*+	*+	++		++	*+	++		*+
Human Leukemia_Haslinger04_24genes (15459216-TableA2d)	GeneSigDB	9	3.82137	1.15209	0.0171469	0.0195375	YES	*+		*+		*+	*+	*+	*+	*+	*+	*+
ACATTCC,MIR-1,MIR-206	MSigDB_C3	9	3.80837	1.09517	0.00378882	0.00778984	YES	*+	*+	*+		*+	*+	*+		*+	*+	*+
KIM_WT1_TARGETS_8HR_UP	MSigDB_C2	9	3.80579	1.16059	0.00456568	0.00668716	YES	*+/**	*+/*+	*+/++		*+/**	*+/*+	++/++		*+/**	*+/**	*+/**
WIEDERSCHAIN_TARGETS_OF_BMI1_AND_PCGF2	MSigDB_C2	9	3.79809	1.47061	0.017723	0.0214519	YES	*+	-+	*+		*+	*+	*+	*+	*+	*+
Human Lung_Lam07_65genes (17510389-Table3)	GeneSigDB	9	3.78245	1.48925	0.0111457	0.0134335	YES	*+	*+	*+		*+	*+	*+	*+		*+	*+
DOANE_RESPONSE_TO_ANDROGEN_DN	MSigDB_C2	9	3.7801	0.897318	0.00322254	0.0054409	YES	+*/*+	**/*+	**/*+		*+/*+	**/*+	*+/++		**/++	+*/*+	**/++
AMUNDSON_POOR_SURVIVAL_AFTER_GAMMA_RADIATION_2G	MSigDB_C2	9	3.7799	1.18514	0.00929796	0.0163537	YES	*+	++	*+		*+	*+	++	*+	*+	++
Human Intestine_Jinawath04_75genes_UpRegulated (15273739-Table1)	GeneSigDB	9	3.76279	1.60935	0.0132102	0.0189323	YES	*+	*+	*+		*+	*+	++	*+	*+	*+
MODULE_44	MSigDB_C4	9	3.75513	1.54962	0.00927327	0.0134393	YES	*+	++	*+		*+	++	++		*+	++	++
Human Brain_Rickman01_53genes (11559565-Table3)	GeneSigDB	9	3.74854	1.19312	0.00741015	0.00673837	YES	*+	*+	*+		*+	*+	*+	*+		*+	*+
MEL18_DN.V1_UP	MSigDB_C6	9	3.74489	1.03102	0.00589489	0.00768244	YES	*+/*+	*+/**	*+/**		*+/*+	*+/*+	*+/-+	*+/**		-+/*+	*+/**
Mouse Skin_Driskell09_685genes (19605494-TableS3)	GeneSigDB	9	3.73594	1.02888	0.00383863	0.00442565	YES	*+	*+	*+	*+	*+	*+	*+			*+	*+
V$OCT1_05	MSigDB_C3	9	3.72814	1.01683	0.00475103	0.00810048	YES	*+	*+	*+		*+	*+	*+	*+	*+		*+
Human StemCell_Macaulay07_516genes (17192395-TableS2b)	GeneSigDB	9	3.72152	1.61909	0.0082643	0.0115067	YES	++	++		*+	*+	*+	++		++	*+	*+
Human Skin_Dry10_181genes (20215513-TableS4)	GeneSigDB	9	3.7092	1.01349	0.00410948	0.00502585	YES	*+	*+	*+	++	*+	*+	*+			*+	++
Human Skin_Dry10_269genes (20215513-TableS3)	GeneSigDB	9	3.70519	1.02069	0.00410948	0.00502585	YES	*+	*+	*+	++	*+	*+	*+			*+	++
MCCLUNG_CREB1_TARGETS_UP	MSigDB_C2	9	3.70121	1.21777	0.0102947	0.0140903	YES	*+/**	*+/**	*+/**		-+/*+		-+/**	*+/*+	*+/**	-+/**	*+/**
WGTTNNNNNAAA_UNKNOWN	MSigDB_C3	9	3.69603	0.874825	0.00280826	0.0049351	YES	*+	*+	*+	++	*+	++	*+		*+	-+
SCHAEFFER_PROSTATE_DEVELOPMENT_48HR_UP	MSigDB_C2	9	3.69271	1.17573	0.00547058	0.00769391	YES	++/*+	*+/*+	*+/*+		*+/-+	++/*+	-+/*+	*+/**		*+/*+	*+/-+
Human Viral_Urosevic07_347genes (17823660-TableS1a)	GeneSigDB	9	3.66547	1.05738	0.00714247	0.0113617	YES	++	*+	*+		*+	*+	++		++	*+	++
V$SRY_02	MSigDB_C3	9	3.66237	0.873619	0.00321058	0.00437543	YES	*+	*+	++	++	-+	*+	-+		*+		*+
Human Colon_Jorissen08_829genes (19088021-supptable2)	GeneSigDB	9	3.66029	0.98809	0.00480949	0.00893634	YES	++	++	*+		++	*+	++		*+	*+	*+
Human Prostate_Zhao10_1841genes (20386565-TableS1)	GeneSigDB	9	3.64849	1.99939	0.0126938	0.013295	YES	*+	*+		*+	*+	*+	++		*+	*+	*+
Blood_Module-2.8_T_cells	SignatureDB	9	3.63466	0.897895	0.00811031	0.0149829	YES	*+	++		*+	*+		*+	*+	*+	*+	*+
REACTOME_BIOLOGICAL_OXIDATIONS	MSigDB_C2	9	3.63363	1.24532	0.00901641	0.0136502	YES	*+	*+	*+	*+	-+	*+	-+	*+		*+
GTGTCAA,MIR-514	MSigDB_C3	9	3.63076	1.15043	0.0126003	0.0170491	YES	*+	*+	*+		*+	*+	*+	*+	*+	*+
Human Breast_Creighton08_1024genes (18794137-SuppTable1c)	GeneSigDB	9	3.61855	0.729469	0.00320277	0.00602915	YES	++	++	++	++	*+	++	++		*+	*+
MATSUDA_NATURAL_KILLER_DIFFERENTIATION	MSigDB_C2	9	3.60808	0.629815	0.00159111	0.00138555	YES		++	++	++	++	++	++		*+	*+	++
FORTSCHEGGER_PHF8_TARGETS_DN	MSigDB_C2	9	3.59734	1.18337	0.00512206	0.00796624	YES	++/++	+*/++	**/++		**/*+	**/*+	**/*+		+*/*+	**/*+	**/++
HAN_SATB1_TARGETS_UP	MSigDB_C2	9	3.59131	1.46677	0.0111732	0.0169822	YES	*+/*+	*+/*+	*+/**		*+/*+	*+/*+	*+/*+		*+/*+	*+/*+	*+/++
TACTTGA,MIR-26A,MIR-26B	MSigDB_C3	9	3.58632	0.961929	0.00421857	0.00533654	YES	*+	++	++		++	*+	++		*+	*+	++
AGCATTA,MIR-155	MSigDB_C3	9	3.58214	0.926411	0.00758221	0.012292	YES	*+	*+		++	*+	*+	*+		++	*+	++
XU_GH1_AUTOCRINE_TARGETS_DN	MSigDB_C2	9	3.57824	0.984186	0.00764467	0.00938452	YES	**/*+	**/++	**/*+	**/++	**/++		*+/++		**/++	**/*+	*+/*+
Human Bone_Heller08_43genes (18172295-Table3)	GeneSigDB	9	3.57114	0.877433	0.0155754	0.0178658	YES		*+	*+	*+	*+	*+	*+		*+	*+	*+
WINTER_HYPOXIA_METAGENE	MSigDB_C2	9	3.56043	1.29258	0.0119376	0.015349	YES	++	++	*+		*+	*+	++		*+	*+	*+
V$PAX4_04	MSigDB_C3	9	3.55861	0.924187	0.00663579	0.0116099	YES	*+	*+	*+		*+	*+	*+		*+	*+	*+
V$FOXO1_01	MSigDB_C3	9	3.5442	0.777541	0.00378056	0.00620911	YES	*+	*+	*+		*+	*+	*+		*+	*+	*+
Human Leukemia_Takeda06_172genes (16818636-TableS1)	GeneSigDB	9	3.54271	1.28952	0.0113644	0.0126357	YES	*+	*+			*+	*+	*+	*+	*+	*+	*+
BMI1_DN.V1_UP	MSigDB_C6	9	3.52581	1.12108	0.00845476	0.00953146	YES	-+/**	-+/**	*+/**		-+/*+	*+/**	-+/*+	*+/**		-+/*+	*+/**
COLDREN_GEFITINIB_RESISTANCE_DN	MSigDB_C2	9	3.52164	1.287	0.0066828	0.00760816	YES	+*/*+	+*/*+		**/*+		**/*+	+*/-+	**/*+	**/*+	**/*+	**/*+
TTANTCA_UNKNOWN	MSigDB_C3	9	3.50954	1.0355	0.00468203	0.00721241	YES	*+	*+	*+			*+	*+	*+	*+	*+	*+
KOYAMA_SEMA3B_TARGETS_DN	MSigDB_C2	9	3.50919	1.19201	0.00813437	0.0156757	YES	*+/*+	*+/*+	+*/*+		*+/-+	*+/-+	*+/*+		+*/*+	*+/*+	++/*+
ATATGCA,MIR-448	MSigDB_C3	9	3.49815	1.74778	0.0140575	0.0177373	YES		++	*+	*+	*+	*+	*+	*+	++		++
Mouse Bone_Boylan07_200genes (17483317-TableS3)	GeneSigDB	9	3.49687	0.937388	0.00872714	0.0109819	YES	*+	*+	*+		-+	*+	*+	*+	*+	*+
LEF1_UP.V1_UP	MSigDB_C6	9	3.49681	1.12803	0.0100443	0.0144131	YES	++/**	*+/*+	++/*+	*+/**	*+/*+	*+/*+	*+/*+		++/*+	*+/*+
CAGGTG_V$E12_Q6	MSigDB_C3	9	3.49462	0.932596	0.00370339	0.00642409	YES	++	*+	++	++	*+	*+	*+	*+	++
Human Leukemia_Chiaretti04_314genes (14684422-TableS1)	GeneSigDB	9	3.49215	1.40418	0.0109277	0.0150341	YES	++	++		++	++	++	++		++	*+	++
Human Breast_Li06_60genes (16979889-Table2)	GeneSigDB	9	3.48518	1.01272	0.0131932	0.0154054	YES	*+	*+	*+	*+	*+	*+	*+			*+	*+
ZHOU_INFLAMMATORY_RESPONSE_FIMA_UP	MSigDB_C2	9	3.48517	1.52818	0.00835906	0.00788253	YES		*+/**	*+/*+		-+/*+	*+/**	-+/**	*+/**	*+/**	-+/**	*+/+*
RIGGINS_TAMOXIFEN_RESISTANCE_DN	MSigDB_C2	9	3.46764	1.18622	0.0100284	0.0123989	YES	**/++	**/++		**/++	*+/*+	*+/*+	**/++		+*/*+	*+/*+	**/*+
LU_IL4_SIGNALING	MSigDB_C2	9	3.43842	1.11567	0.0115281	0.0138768	YES	++	++	++		*+	++	++		++	++	++
Mouse StemCell_Fazzio08_1078genes (18614019-TableS4d)	GeneSigDB	9	3.43359	1.07561	0.00820123	0.0140077	YES	*+	*+	*+		-+	*+	-+	*+	*+		*+
SHETH_LIVER_CANCER_VS_TXNIP_LOSS_PAM2	MSigDB_C2	9	3.42676	0.900363	0.00758757	0.0107022	YES	*+	*+		*+	*+	*+	*+		*+	*+	*+
BENPORATH_OCT4_TARGETS	MSigDB_C2	9	3.41723	1.07224	0.00939109	0.0129532	YES		*+	*+	++	*+	*+	++		*+	*+	*+
Human Leukemia_Agirre08_1149genes (19074828-TableS4)	GeneSigDB	9	3.41364	1.24772	0.0117582	0.0189706	YES	*+	*+		-+	*+	*+	*+		*+	*+	*+
CREIGHTON_ENDOCRINE_THERAPY_RESISTANCE_3	MSigDB_C2	9	3.41062	0.600944	0.00358123	0.00728967	YES	++	++	++	++	*+	++	++		*+	*+
V$OCT1_Q6	MSigDB_C3	9	3.40951	0.950637	0.0079651	0.0106947	YES		*+	++	*+	*+	*+	*+	*+	++		++
FLECHNER_BIOPSY_KIDNEY_TRANSPLANT_REJECTED_VS_OK_DN	MSigDB_C2	9	3.40373	0.993449	0.00500254	0.00564807	YES	+*/++	++/++		+*/*+	+*/*+	**/*+	+*/++		*+/*+	*+/*+	++/++
Human Viral_Wang04_114genes (15220918-TableS1b)	GeneSigDB	9	3.39979	1.16728	0.0123381	0.0145286	YES	*+	*+	*+		*+	*+	*+	*+	*+	*+
GRAHAM_CML_QUIESCENT_VS_NORMAL_QUIESCENT_DN	MSigDB_C2	9	3.39418	1.08766	0.0145689	0.0131731	YES	++/*+			**/*+	**/*+	**/*+	+*/*+	**/*+	**/*+	**/*+	+*/*+
CD40_Burkitt_lymphoma_UP	SignatureDB	9	3.38346	1.08388	0.0123702	0.0145701	YES	++/*+	++/*+		++/*+	++/*+	++/*+	++/*+	++/*+		++/*+	++/*+
EGFR_UP.V1_DN	MSigDB_C6	9	3.37949	0.952058	0.0121505	0.0179246	YES	+*/*+	*+/++			*+/++	*+/*+	++/++	**/*+	*+/*+	*+/++	++/++
Human EmbryonicStemCell_Thomas08_1088genes (18689800-TableS7)	GeneSigDB	9	3.36842	1.70005	0.0136666	0.0172228	YES	++	++	*+		++	++	++		++	++	++
PID_KITPATHWAY	MSigDB_C2	9	3.3659	0.859732	0.014039	0.0155229	YES	*+		*+	*+	*+	*+	++		++	*+	*+
Mouse StemCell_Forsberg05_108genes (16151515-TableS6)	GeneSigDB	9	3.36424	0.953127	0.0118309	0.0105252	YES	*+	*+	*+		-+	*+	*+		*+	*+	*+
KATSANOU_ELAVL1_TARGETS_UP	MSigDB_C2	9	3.36311	1.12578	0.0104307	0.0126337	YES		*+/*+	*+/+*		*+/**	*+/**	*+/*+	*+/**	*+/**	*+/**	*+/**
CTTTGTA,MIR-524	MSigDB_C3	9	3.34124	0.719644	0.00694986	0.0152237	YES	*+	*+	-+		*+	*+	*+		*+	*+	*+
BIOCARTA_HDAC_PATHWAY	MSigDB_C2	9	3.31102	0.590463	0.0152607	0.0139361	YES	*+	*+	*+	*+	*+		*+		*+	*+	*+
TGTATGA,MIR-485-3P	MSigDB_C3	9	3.30683	0.942442	0.00905672	0.0134988	YES	*+	++		++	*+	*+	++		*+	*+	++
TAKEDA_TARGETS_OF_NUP98_HOXA9_FUSION_8D_UP	MSigDB_C2	9	3.30281	0.872871	0.00821084	0.011362	YES	*+/**	*+/**	*+/**		-+/*+	*+/*+	*+/++		*+/**	-+/*+	*+/**
MARTINEZ_RESPONSE_TO_TRABECTEDIN	MSigDB_C2	9	3.29277	0.79581	0.0137589	0.0120969	YES	*+	*+	*+	*+	*+		*+	*+		*+	*+
Human Lymphoma_deVos03_104genes (12594241-Table2)	GeneSigDB	9	3.2832	0.936856	0.0141716	0.0151277	YES	*+	*+	*+	*+	*+		*+	*+		*+	++
BASSO_CD40_SIGNALING_UP	MSigDB_C2	9	3.26354	1.05703	0.0141868	0.0170567	YES	++/*+	++/*+		++/*+	++/*+	++/*+	++/*+	++/*+		++/*+	++/*+
DAZARD_UV_RESPONSE_CLUSTER_G6	MSigDB_C2	9	3.26159	1.10289	0.0126641	0.0160161	YES	++	*+		++	++	++	++		*+	*+	++
Human Breast_Sotiriou03_606genes_ER (12917485-Table6)	GeneSigDB	9	3.25689	0.941951	0.00985786	0.0157779	YES	++	++			++	++	++	*+	++	++	++
WANG_CISPLATIN_RESPONSE_AND_XPC_DN	MSigDB_C2	9	3.25469	0.811487	0.00873585	0.0128576	YES	**/*+	**/*+	**/*+	**/++	**/*+	**/*+	+*/++		**/++	+*/*+
V$CEBP_01	MSigDB_C3	9	3.25331	1.12038	0.0117773	0.0116592	YES	*+	*+	*+	*+	*+	*+	*+		*+	-+
Mouse StemCell_Fazzio08_466genes (18614019-TableS4b)	GeneSigDB	9	3.24365	1.01827	0.012498	0.0180744	YES	*+	*+		++	*+	*+	++		++	*+	*+
V$CDC5_01	MSigDB_C3	9	3.23881	0.782557	0.00829626	0.00974898	YES	*+	*+	*+	++	*+		*+	*+	*+		*+
Mouse StemCell_Ramos06_1482genes (17009876-tableS1a)	GeneSigDB	9	3.21978	0.697402	0.00519502	0.0106103	YES	++	++	*+		*+	*+	++		++	*+	++
Human Leukemia_Teuffel04_726genes (15257931-SuppTableA)	GeneSigDB	9	3.20461	0.660941	0.00685481	0.0137027	YES	++	++	*+	*+	++		++	*+	++		++
Human Breast_Creighton08_453genes (18794137-SuppTable1d)	GeneSigDB	9	3.1991	0.609758	0.00619165	0.00789914	YES	++	++	*+	++	++		++		*+	*+	++
Human Lymphoma_Wouters07_223genes (17671232-TableS2a)	GeneSigDB	9	3.19878	0.391699	0.00476666	0.0039309	YES	++	*+		*+	++	*+	++		*+	*+	*+
MARTINEZ_RB1_TARGETS_UP	MSigDB_C2	9	3.19136	0.967363	0.00856888	0.0114484	YES	*+/++	*+/++	*+/*+		*+/*+	*+/**	++/*+		*+/**	*+/*+	*+/**
Human Lymphoma_Chng09_209genes (18974375-TableS2)	GeneSigDB	9	3.18685	1.07181	0.0131874	0.0161917	YES	*+	++		*+	*+	*+	++		*+	-+	*+
TAKEDA_TARGETS_OF_NUP98_HOXA9_FUSION_6HR_UP	MSigDB_C2	9	3.18384	1.10986	0.0205639	0.0207283	YES	*+/**	*+/**		*+/**		*+/**	*+/*+	*+/*+	*+/*+	*+/**	*+/**
Human Leukemia_Alcalay05_160genes (15831697-TableS3)	GeneSigDB	9	3.17956	0.794018	0.0101868	0.0151476	YES	*+	*+		++	*+		*+	*+	*+	*+	*+
YAGI_AML_WITH_11Q23_REARRANGED	MSigDB_C2	9	3.15705	0.643038	0.00782901	0.0156581	YES	++	++	*+		*+	*+	++		*+	*+	++
STARK_PREFRONTAL_CORTEX_22Q11_DELETION_UP	MSigDB_C2	9	3.15235	0.660031	0.00787098	0.00938869	YES	++/+*	*+/+*	*+/**		*+/+*	++/*-	++/+-		++/**	*+/**	++/**
MASSARWEH_RESPONSE_TO_ESTRADIOL	MSigDB_C2	9	3.14389	0.387061	0.0116966	0.0106312	YES	*+	*+	*+	*+	*+	*+	*+		*+		*+
LU_EZH2_TARGETS_DN	MSigDB_C2	9	3.13933	0.985759	0.0116446	0.0136065	YES	+*/++	+*/*+	**/++		*+/++	-*/++	**/++		**/++	**/*+	**/*+
Mouse StemCell_Bonuccelli09_119genes (19395651-TableS1a)	GeneSigDB	9	3.13865	0.62318	0.012898	0.0160556	YES	*+	*+	*+	*+	*+	*+	*+		*+	*+
CREIGHTON_ENDOCRINE_THERAPY_RESISTANCE_4	MSigDB_C2	9	3.12268	0.526013	0.0067429	0.00904619	YES	++	++	*+	++	++		++		*+	*+	++
HELLER_HDAC_TARGETS_SILENCED_BY_METHYLATION_DN	MSigDB_C2	9	3.11316	0.761425	0.00980195	0.0117172	YES		*+/++	*+/++		-+/++	*+/++	*+/++	++/*+	*+/++	*+/++	*+/++
WALLACE_PROSTATE_CANCER_RACE_UP	MSigDB_C2	9	3.07805	1.13237	0.0150616	0.0175959	YES	++/**	++/**		*+/**	*+/**	*+/**	++/**	++/**		*+/**	++/**
V$FOXO3_01	MSigDB_C3	9	3.06199	1.02377	0.0155515	0.0176985	YES	*+	*+	*+			*+	*+	*+	*+	*+	*+
V$TAL1BETAITF2_01	MSigDB_C3	9	3.04073	0.549549	0.00772823	0.00660128	YES	*+	*+	*+	*+	*+		*+	*+		*+	*+
BOYLAN_MULTIPLE_MYELOMA_C_D_DN	MSigDB_C2	9	3.03394	0.642244	0.0111003	0.0152422	YES		+*/*+	**/*+	+*/*+		**/*+	+*/++	+*/*+	+*/*+	**/*+	++/*+
Human Viral_Cairo08_588genes (19061838-TableS3)	GeneSigDB	9	3.02919	0.676021	0.0107177	0.0166005	YES	*+	++	*+		*+	*+	*+		*+	-+	*+
Human Pancreas_Nakamura04_346genes (14767473-SuppTable2)	GeneSigDB	9	3.01352	0.862245	0.0128031	0.0138559	YES	*+	*+	*+		*+	*+	-+		*+	-+	*+
KUMAR_TARGETS_OF_MLL_AF9_FUSION	MSigDB_C2	9	2.98345	1.32042	0.0187596	0.0183242	YES	*+	*+		*+	*+	*+	++		*+	*+	++
YCATTAA_UNKNOWN	MSigDB_C3	9	2.9698	0.607339	0.00720137	0.00661352	YES		*+	*+		*+	*+	*+	*+	*+	*+	*+
Human StemCell_Huang08_120genes (18308945-Table4)	GeneSigDB	9	2.94501	0.638858	0.0145436	0.0143791	YES	*+	*+	*+	++	*+	*+	++		*+	*+
MQ_NFKB	DU_MQ	9	2.9262	1.10408	0.0178346	0.0166739	YES	*+	++	*+	++	*+	++	++			*+	++
Dendritic_cell_CD123pos_blood	SignatureDB	9	2.86555	0.503761	0.00887082	0.00543939	YES	++	++	++	++	++	++	++	++			++
Human Leukemia_Wilson06_50genes_SigDifferentialClusterB1 (16597596-TableS1-2)	GeneSigDB	9	2.81436	0.541251	0.0234252	0.0183082	YES	*+	*+	*+		*+	*+	*+		*+	*+	*+
Human Prostate_Wallace08_489genes (18245496-SuppTable2)	GeneSigDB	9	2.79721	0.805182	0.0122191	0.00802115	YES	++	++		*+	*+	*+	++	++		*+	++
CCTNTMAGA_UNKNOWN	MSigDB_C3	9	2.74577	0.491616	0.0164062	0.0100974	YES	*+	*+		*+	*+	*+	*+		*+	*+	*+
SABATES_COLORECTAL_ADENOMA_DN	MSigDB_C2	9	2.73771	0.870481	0.0192945	0.0168864	YES	**/*+	**/*+	**/*+	**/*+			-*/-+	**/*+	**/*+	-*/*+	**/*+
V$SOX5_01	MSigDB_C3	9	2.72546	0.581753	0.0162981	0.0177238	YES	*+	*+		++	*+	*+	*+		*+	*+	*+
AACATTC,MIR-409-3P	MSigDB_C3	9	2.71526	0.551491	0.0174626	0.0136359	YES	*+	*+	*+		*+	*+	++		*+	*+	*+
MODULE_119	MSigDB_C4	9	2.71434	0.644716	0.0194323	0.0150645	YES	++	++		++	*+	++	++		++	++	++
ACTGCAG,MIR-17-3P	MSigDB_C3	9	2.56146	0.430886	0.0236025	0.0176428	YES	*+	*+	*+	++	*+	*+	*+		*+		*+
REACTOME_MITOTIC_M_M_G1_PHASES	MSigDB_C2	9	-2.07018	0.52911	0.027639	0.0147118	YES			--	*-	*-	*-	+-	*-	*-	+-	*-
Mouse Lymphoma_Wu08_1114genes (18535662-TableS1b)	GeneSigDB	9	-2.32763	0.493476	0.0166863	0.0148429	YES	+-	+-	*-	*-	+-	*-	+-	*-		+-
MORF_HDAC2	MSigDB_C4	9	-2.33631	0.866874	0.0207875	0.0167138	YES	+-		*-	*-	+-	*-	+-	*-	*-	+-
MORF_BUB3	MSigDB_C4	9	-2.47913	0.85557	0.0146372	0.0136286	YES			*-	*-	+-	*-	+-	*-	*-	+-	+-
MORF_RAD23A	MSigDB_C4	9	-2.52865	0.938603	0.0106896	0.00751612	YES		+-	*-	*-		*-	+-	*-	*-	+-	+-
HIF1alpha_1.5x_DN	SignatureDB	9	-2.65575	0.851443	0.0127009	0.0156422	YES	*+/+-	-+/+-		**/*-	-+/+-	*+/*-	*+/+-	*+/+-	**/*-	-+/+-
MARTENS_TRETINOIN_RESPONSE_DN	MSigDB_C2	9	-2.76406	1.36523	0.0165279	0.0155631	YES	-*/+-	--/+-	**/*-		--/+-	-*/*-	-*/+-	**/*-	*-/*-	-*/+-
CAIRO_HEPATOBLASTOMA_CLASSES_UP	MSigDB_C2	9	-2.93961	1.3414	0.0114624	0.0105488	YES	+-/*+	+-/*+		+-/**	+-/*+	+-/*+	+-/*+	*-/**	*-/*+	+-/*+
MARSON_BOUND_BY_E2F4_UNSTIMULATED	MSigDB_C2	9	-3.2504	0.77205	0.0015274	0.00208275	YES		+-	*-		+-	*-	+-	+-	*-	+-	*-
Normal_mesenchymal-1_Node1643	SignatureDB	8	12.6325	3.28144	3.21344e-08	8.95854e-08	YES	-+	-+	*+		-+	*+	-+		*+	-+
REN_ALVEOLAR_RHABDOMYOSARCOMA_DN	MSigDB_C2	8	10.4156	3.07787	7.65743e-08	2.15506e-07	YES	**/++	**/*+	**/*+		**/*+	*+/*+	*+/*+		**/*+	**/*+
Human StemCell_Huang08_60genes_MSCs (18308945-Table2)	GeneSigDB	8	10.2978	2.58878	7.97171e-08	1.82967e-07	YES	-+	-+	*+		-+	*+	-+		*+	-+
Mouse Breast_Piechocki08_558genes (18435859-ShorterGeneList)	GeneSigDB	8	9.26932	2.12957	8.68604e-08	2.43792e-07	YES	*+	-+	*+		-+	*+	-+		*+	-+
PROTEINACEOUS_EXTRACELLULAR_MATRIX	MSigDB_C5	8	9.2604	2.84405	3.94733e-07	1.05075e-06	YES	-+	-+	*+		-+	*+	-+		*+	*+
Human Lung_Oh10_38genes (20338664-Table2)	GeneSigDB	8	9.19651	2.28682	5.38228e-06	1.51313e-05	YES	*+	*+	*+		-+	*+	*+		*+	*+
EXTRACELLULAR_MATRIX	MSigDB_C5	8	9.15623	2.79823	4.97985e-07	1.3108e-06	YES	-+	-+	*+		-+	*+	-+		*+	*+
GNF2_CDH11	MSigDB_C4	8	8.9389	1.9328	7.1963e-07	1.30098e-06	YES	*+	*+	*+		*+	*+	-+		*+	*+
Human Viral_Chetaille09_76genes (19096012-TableS4)	GeneSigDB	8	8.67517	2.76063	0.000210055	0.0005906	YES	*+	*+	*+		-+	*+	*+		*+	*+
Mouse Lymphoma_Clasper08_56genes (18794116-Table1)	GeneSigDB	8	7.7086	1.73797	1.16398e-05	2.26857e-05	YES	*+	*+	*+		*+	*+	*+		*+	*+
ZHU_CMV_ALL_DN	MSigDB_C2	8	7.69643	1.19244	5.8224e-06	1.6404e-05	YES	+*/*+	+*/*+	**/*+		+*/*+	**/*+	+*/*+		**/*+	**/*+
PID_INTEGRIN1_PATHWAY	MSigDB_C2	8	7.53789	1.63332	7.81559e-05	0.000220579	YES	*+	*+	*+		-+	*+	-+		*+	-+
ZHU_CMV_24_HR_DN	MSigDB_C2	8	7.34246	1.14311	6.45839e-06	1.78468e-05	YES	+*/*+	+*/*+	**/*+		+*/*+	**/*+	+*/*+		**/*+	**/*+
RUTELLA_RESPONSE_TO_CSF2RB_AND_IL4_UP	MSigDB_C2	8	7.33082	2.78806	9.28949e-06	2.33041e-05	YES	++/++	++/++			++/++	*+/++	++/++		*+/+*	*+/*+	++/++
EXTRACELLULAR_MATRIX_PART	MSigDB_C5	8	7.26579	1.67378	5.81071e-05	0.000157999	YES	*+	-+	*+		-+	*+	-+		*+	*+
COLLAGEN	MSigDB_C5	8	7.26093	2.06462	0.000574072	0.00153642	YES	*+	*+	*+		*+	*+	*+		*+	*+
Human Prostate_Chambers09_40genes (19489030-SuppTable2)	GeneSigDB	8	6.82511	1.79206	0.000155956	0.000231851	YES	*+	*+	*+		-+	*+	-+		*+	*+
PID_SYNDECAN_1_PATHWAY	MSigDB_C2	8	6.73345	1.85933	0.000546412	0.0015405	YES	*+	*+	*+		*+	*+	-+		*+	*+
RUTELLA_RESPONSE_TO_HGF_UP	MSigDB_C2	8	6.70859	5.13597	0.00533129	0.0132162	YES	++/++	++/++			++/++	*+/+*	++/++		*+/+*	*+/++	++/++
Human Prostate_Verona07_41genes (17575140-Table1)	GeneSigDB	8	6.6953	1.26679	4.45449e-05	7.91399e-05	YES	*+	-+	*+		*+	*+	*+		*+	*+
SASAI_RESISTANCE_TO_NEOPLASTIC_TRANSFROMATION	MSigDB_C2	8	6.49109	1.16361	7.98955e-05	0.000213121	YES	*+	*+	*+		*+	*+	*+		*+	*+
Human Lymphoma_Mahadevan05_21genes_PTCL-NOSvsNormalPeripheralBloodTCells (16373702-Table1a)	GeneSigDB	8	6.36335	1.86604	0.000527602	0.00116137	YES	*+	*+	*+		*+	*+	*+		*+	*+
REACTOME_COLLAGEN_FORMATION	MSigDB_C2	8	6.26809	2.10625	0.00248499	0.00698853	YES	*+	*+	*+		*+	*+	*+		*+	*+
KEGG_ECM_RECEPTOR_INTERACTION	MSigDB_C2	8	6.2116	2.25343	0.000983861	0.00209215	YES	*+	*+	*+		-+	*+	-+		*+	*+
Human Lymphoma_Tun08_63genes (18184868-Table1)	GeneSigDB	8	6.15403	2.08362	0.000790481	0.00110418	YES	*+	*+	*+		*+	*+	*+		*+	*+
SUNG_METASTASIS_STROMA_UP	MSigDB_C2	8	6.14847	2.07599	0.000381897	0.000713433	YES	*+/+*	*+/+*	*+/*+		*+/+*	*+/**	*+/+*		*+/**	*+/+*
Mouse Lung_Rangasamy09_57genes (19286929-SuppTable2e)	GeneSigDB	8	6.00811	2.28132	0.00227087	0.00421775	YES	*+	*+	*+		-+	*+	*+		*+	*+
KIM_GLIS2_TARGETS_UP	MSigDB_C2	8	5.98691	1.49652	0.000125375	0.000277949	YES	*+/**	*+/**	*+/**		*+/**	*+/**	*+/**		*+/**	*+/**
JECHLINGER_EPITHELIAL_TO_MESENCHYMAL_TRANSITION_UP	MSigDB_C2	8	5.86243	2.08071	0.00340928	0.00944952	YES	*+/**	*+/*+	*+/*+		*+/*+	*+/*+	*+/*+		*+/*+	*+/*+
WESTON_VEGFA_TARGETS_6HR	MSigDB_C2	8	5.80713	1.39097	0.000813995	0.00159729	YES	*+	-+	*+		-+	*+	-+			-+	*+
Human Breast_Dairkee04_202genes (15260889-TableS2b)	GeneSigDB	8	5.78717	1.13833	0.000355865	0.000992073	YES	*+	*+	*+		*+	*+	*+		*+	*+
REACTOME_EXTRACELLULAR_MATRIX_ORGANIZATION	MSigDB_C2	8	5.76525	1.92823	0.00232221	0.00615766	YES	*+	*+	*+		-+	*+	-+		*+	*+
Mouse Breast_Piechocki08_73genes (18435859-Table2)	GeneSigDB	8	5.74674	1.82251	0.00330349	0.00902578	YES	*+	*+	*+		-+	*+	*+		*+	*+
CHANDRAN_METASTASIS_DN	MSigDB_C2	8	5.69942	1.10142	3.26323e-05	7.63781e-05	YES	*+/*+	**/*+	**/*+		*+/*+	**/*+	**/*+		**/*+	**/*+
DACOSTA_UV_RESPONSE_VIA_ERCC3_COMMON_DN	MSigDB_C2	8	5.65119	1.71634	0.00450312	0.0127348	YES	**/++	**/++		**/++	**/++	**/++	**/++			**/*+	**/++
MODULE_5	MSigDB_C4	8	5.60099	2.70215	0.00209401	0.00392349	YES		*+	*+		-+	*+	++		*+	*+	++
MODULE_234	MSigDB_C4	8	5.56513	2.20729	0.00440206	0.0116185	YES	*+	*+	*+		-+	*+	*+		*+	*+
Human Uterine_Schmalbach04_24genes (15023835-Figure3a)	GeneSigDB	8	5.53391	0.7786	0.000251214	0.00024499	YES	*+	++	*+		*+	*+	++		*+	*+
Human BoneMarrow_Maisel10_105genes (20599952-Table1)	GeneSigDB	8	5.46422	0.78879	3.87686e-05	5.53453e-05	YES	*+	-+	*+		*+	*+	*+		*+	*+
VANHARANTA_UTERINE_FIBROID_UP	MSigDB_C2	8	5.45986	1.77813	0.00318304	0.00734616	YES	*+/*+	*+/*+	*+/*+		*+/*+	*+/*+	*+/*+		*+/*+	*+/*+
Mouse Breast_Park07_173genes (17206280-TableS1C)	GeneSigDB	8	5.45472	2.36602	0.00959038	0.0177985	YES	*+	*+	++		*+	*+	*+		*+	*+
Human Uterine_Vanharanta05_54genes (15940248-Table2)	GeneSigDB	8	5.43672	1.74355	0.00318307	0.00734615	YES	*+	*+	*+		*+	*+	*+		*+	*+
Human Breast_Bergamaschi08_278genes (18044827-Table2)	GeneSigDB	8	5.31044	1.3017	0.000351929	0.000940868	YES	*+	*+	*+		-+	*+	-+		*+	-+
Human HeadandNeck_Moustafa02_19genes (11965536-Table2)	GeneSigDB	8	5.30527	1.26355	0.00211218	0.0035403	YES	*+	*+	*+		*+	*+	*+		*+	*+
Human Pancreas_Tan03_30genes_OverExpressed (12679940-Table1)	GeneSigDB	8	5.26279	1.90441	0.00368335	0.0092285	YES	*+	*+	*+		-+	*+	*+		*+	*+
KAAB_HEART_ATRIUM_VS_VENTRICLE_UP	MSigDB_C2	8	5.25977	2.01806	0.00500502	0.0122347	YES	*+/++	*+/+*	*+/**		*+/+*	*+/**	*+/+*		*+/**	*+/**
TURASHVILI_BREAST_DUCTAL_CARCINOMA_VS_LOBULAR_NORMAL_UP	MSigDB_C2	8	5.24979	0.979015	0.000216719	0.000306264	YES	*+/*+	*+/**	*+/**		*+/**	*+/**	++/*+		*+/**	*+/*+
Mouse Lung_not_cancer_Pulichino08_47genes (18403781-SuppTable1)	GeneSigDB	8	5.24943	1.08779	0.000555567	0.00100569	YES	*+	++	*+		*+	*+	*+		*+	*+
CUI_TCF21_TARGETS_UP	MSigDB_C2	8	5.20372	1.33586	0.00354677	0.00953938	YES	*+/**	*+/**	*+/**		*+/**	*+/**	-+/**			*+/**	*+/+*
MODULE_19	MSigDB_C4	8	5.18987	1.62237	0.00162413	0.00421234	YES	*+	*+	*+		*+	*+	*+		*+	-+
Human Breast_Blick10_69genes_EMT_up (20521089-SuppTable1a)	GeneSigDB	8	5.18493	2.05985	0.00616283	0.0101594	YES	*+	*+	*+		*+	*+	*+		*+	*+
EXTRACELLULAR_REGION_PART	MSigDB_C5	8	5.17746	2.50864	0.00106014	0.00166505	YES	-+	-+	*+		-+	-+	-+		*+	-+
PID_INTEGRIN3_PATHWAY	MSigDB_C2	8	5.15002	1.20189	0.00146502	0.00331433	YES	*+	*+	*+		-+	*+	*+		*+	*+
Human Breast_Yu07_298genes (17894856-SuppList4)	GeneSigDB	8	5.1194	2.08882	0.00669472	0.0130736	YES	*+	*+	*+		*+	*+	++			*+	*+
MASSARWEH_TAMOXIFEN_RESISTANCE_UP	MSigDB_C2	8	5.11309	1.30862	0.000274922	0.000500348	YES	++/*+	*+/*+			*+/*+	*+/*+	*+/*+		*+/*+	*+/*+	*+/++
HELLER_SILENCED_BY_METHYLATION_UP	MSigDB_C2	8	5.0933	1.84718	0.00144406	0.0030138	YES	*+/**	*+/*+			*+/**	*+/*+	*+/*+		*+/**	*+/**	*+/*+
BURTON_ADIPOGENESIS_PEAK_AT_0HR	MSigDB_C2	8	5.08182	1.18468	0.000731074	0.00147151	YES	*+	*+	*+		*+	*+	*+		*+	*+
Human Breast_MorenoBueno06_117genes (17018611-Table2)	GeneSigDB	8	5.01775	1.42549	0.00144107	0.00241214	YES		*+	*+		*+	++	*+	++	*+	*+
YAO_TEMPORAL_RESPONSE_TO_PROGESTERONE_CLUSTER_16	MSigDB_C2	8	5.00323	1.07697	0.00150362	0.00396793	YES	*+	*+	*+		*+	*+	*+		*+	*+
TGCCTTA,MIR-124A	MSigDB_C3	8	4.98055	1.18614	0.000424617	0.00100988	YES	++	++	*+		*+	*+	++		++		*+
KAYO_CALORIE_RESTRICTION_MUSCLE_UP	MSigDB_C2	8	4.91298	0.98891	0.000897852	0.00175262	YES	*+/**	*+/*+	*+/**		*+/**	*+/**	*+/**			*+/**	*+/**
HOSHIDA_LIVER_CANCER_SURVIVAL_UP	MSigDB_C2	8	4.89092	1.17519	0.00160829	0.00361237	YES	*+/**	*+/**	*+/**		*+/**	*+/**	*+/+*			*+/**	*+/**
Human StemCell_Kocer08_185genes (18667080-TableS4)	GeneSigDB	8	4.88861	1.54193	0.00106134	0.00164652	YES	*+	*+	*+		*+	*+	*+		*+	*+
Human Bladder_Gildea02_30genes (12438227-Table1)	GeneSigDB	8	4.87043	1.06685	0.00360177	0.00827743	YES	*+	*+	*+		*+	*+	*+		*+	*+
GILDEA_METASTASIS	MSigDB_C2	8	4.85871	1.19803	0.00459192	0.0111001	YES	*+	*+	*+		*+	*+	*+		*+	*+
COLLER_MYC_TARGETS_DN	MSigDB_C2	8	4.85614	1.28904	0.00444607	0.00601183	YES	**/*+	+*/*+	**/*+		+*/*+	**/*+	+*/*+		**/*+	**/*+
Human HeadandNeck_Hensen08_26genes (18544165-Table2)	GeneSigDB	8	4.84239	2.20322	0.00756754	0.00899241	YES	*+	*+	*+		*+	*+	*+		*+	*+
CORDENONSI_YAP_CONSERVED_SIGNATURE	MSigDB_C6	8	4.82428	1.38821	0.00125023	0.00188718	YES	*+	*+	*+		*+	*+	*+		*+	*+
Human HeadandNeck_Sok03_57genes (12874079-Table3a)	GeneSigDB	8	4.81512	1.34137	0.00144371	0.00238365	YES	*+	-+	*+		-+	*+	-+		*+	*+
ESC_V6.5_UP_EARLY.V1_DN	MSigDB_C6	8	4.79834	1.20313	0.00192542	0.00471045	YES	*+/*+	**/*+	**/*+		**/*+	**/*+	**/*+		**/*+	**/*+
NIELSEN_LEIOMYOSARCOMA_CNN1_DN	MSigDB_C2	8	4.78186	1.59005	0.00446384	0.00570472	YES	*+/*+	**/*+		**/++	*+/*+	**/*+	**/*+		*+/*+	**/*+
BURTON_ADIPOGENESIS_8	MSigDB_C2	8	4.77354	1.95672	0.00651108	0.0152892	YES	*+	*+	*+		*+	*+	*+		*+	*+
DURAND_STROMA_MAX_UP	MSigDB_C2	8	4.76355	1.93498	0.000957008	0.00172098	YES	*+/**	*+/*+	*+/+*		*+/*+	*+/*+	*+/*+		*+/*+	*+/*+
Mouse StemCell_zurNieden07_38genes (17170073-TableS1)	GeneSigDB	8	4.74887	2.02299	0.00370688	0.00437462	YES	*+	*+	*+		*+	*+	*+		*+	*+
Pan_B_U133plus	SignatureDB	8	4.74447	1.24802	0.00255464	0.00546	YES	*+	++		++		++	++	*+	++		++
RODWELL_AGING_KIDNEY_UP	MSigDB_C2	8	4.7233	1.31228	0.000554384	0.00117174	YES	++/**	++/++	++/**		*+/*+	++/*+	++/*+		++/*+	*+/**
VERHAAK_GLIOBLASTOMA_NEURAL	MSigDB_C2	8	4.71963	1.34611	0.00171539	0.00299018	YES	*+	*+	++		*+	*+	++		*+	*+
REACTOME_NCAM_SIGNALING_FOR_NEURITE_OUT_GROWTH	MSigDB_C2	8	4.71916	1.38542	0.00235161	0.00417943	YES	*+	*+	*+		*+	*+	*+		*+	*+
EXTRACELLULAR_REGION	MSigDB_C5	8	4.71088	2.41713	0.00537634	0.0123176	YES	*+	-+	*+		-+	-+	-+		*+	-+
LY_AGING_MIDDLE_UP	MSigDB_C2	8	4.70871	2.14779	0.00915231	0.011549	YES	*+/**	*+/**	*+/**		*+/**	*+/**	*+/+*	*+/**		*+/+*
GABRIELY_MIR21_TARGETS	MSigDB_C2	8	4.67592	1.98439	0.00521459	0.0096903	YES	*+	*+	*+		*+	++	*+		*+	*+
POTTI_TOPOTECAN_SENSITIVITY	MSigDB_C2	8	4.65286	1.54378	0.00232484	0.00371036	YES	*+	*+	*+		*+	*+	*+		*+	*+
Human Breast_HernandezVargas07_313genes (17099726-SuppTable1)	GeneSigDB	8	4.64133	1.95831	0.00532791	0.00752013	YES		*+	*+		*+	*+	*+		*+	*+	*+
GRAHAM_CML_QUIESCENT_VS_NORMAL_DIVIDING_DN	MSigDB_C2	8	4.64083	1.9415	0.0154944	0.0196848	YES	*+/*+	+*/*+	**/*+	**/*+			+*/*+	+*/*+	**/*+		**/*+
VALK_AML_CLUSTER_11	MSigDB_C2	8	4.60684	1.07539	0.00486963	0.0116559	YES	*+	*+			*+	*+	*+	*+		*+	*+
ZHAN_MULTIPLE_MYELOMA_CD2_UP	MSigDB_C2	8	4.59126	0.958406	0.0022185	0.00399768	YES	*+/+*	*+/+*	*+/**	*+/**	*+/+*		*+/+*		*+/**		++/+*
DELYS_THYROID_CANCER_DN	MSigDB_C2	8	4.57553	1.60949	0.00367112	0.00684921	YES	++/*+	*+/*+	*+/*+	+*/*+	*+/*+	*+/*+	*+/*+			*+/*+
DELYS_THYROID_CANCER_UP	MSigDB_C2	8	4.56508	1.62264	0.00662294	0.0139286	YES	++/*+	*+/*+	*+/*+		*+/*+	*+/*+	*+/*+			*+/*+	++/**
Human HeadandNeck_Sengupta06_403genes (16912175-SuppTable3a)	GeneSigDB	8	4.56493	1.15979	0.00026832	0.000362587	YES	*+	++	*+		++	*+	++		*+	*+
Mouse Breast_Crawford07_981genes (18081427-TableS8)	GeneSigDB	8	4.55962	1.88781	0.00586158	0.0139171	YES	++	++		*+	*+	*+	*+		*+	*+
BRUECKNER_TARGETS_OF_MIRLET7A3_DN	MSigDB_C2	8	4.54592	1.54125	0.00593308	0.0115868	YES		*+/++	**/*+		*+/*+	*+/*+	*+/*+		**/*+	*+/*+	++/*+
CHIARADONNA_NEOPLASTIC_TRANSFORMATION_CDC25_UP	MSigDB_C2	8	4.54552	1.43339	0.00675174	0.0125995	YES	*+/*+	*+/*+	*+/**		*+/*+	*+/*+	*+/*+			*+/*+	*+/**
Myeloma_CD-2_subgroup_UP	SignatureDB	8	4.52255	0.95305	0.00249874	0.00434118	YES	*+/+*	*+/+*	*+/**	*+/**	*+/+*		*+/+*		*+/**		++/+*
Human Bone_Heller08_284genes (18172295-SuppTable1)	GeneSigDB	8	4.45839	1.56084	0.00243411	0.00355555	YES	*+	*+			*+	*+	*+		*+	*+	*+
RUTELLA_RESPONSE_TO_HGF_DN	MSigDB_C2	8	4.42744	1.53227	0.00556289	0.0118993	YES	++/++	++/++		+*/*+	++/++		++/++	**/*+		*+/++	++/++
Human Leukemia_Haslinger04_109genes (15459216-TableA2a)	GeneSigDB	8	4.42579	0.865603	0.0024675	0.00619109	YES	*+	*+		*+	*+	*+	++			*+	*+
BROWNE_HCMV_INFECTION_18HR_DN	MSigDB_C2	8	4.41103	1.34547	0.00203301	0.00411961	YES	**/*+	**/*+	*-/*+		**/*+	**/*+	+*/*+		**/*+	**/*+
MODULE_66	MSigDB_C4	8	4.40782	2.0199	0.00622128	0.0142785	YES	*+	-+	*+		-+	*+	-+			*+	*+
SENGUPTA_NASOPHARYNGEAL_CARCINOMA_UP	MSigDB_C2	8	4.40089	1.28663	0.000566503	0.000719293	YES	++/**	++/**	*+/**		++/-*	*+/**	++/-+		*+/-*	*+/**
GUENTHER_GROWTH_SPHERICAL_VS_ADHERENT_DN	MSigDB_C2	8	4.39628	0.97563	0.00596685	0.00811305	YES		**/*+	**/*+		**/*+	**/*+	**/*+		**/*+	**/*+	**/*+
Human StemCell_Amundson08_990genes (18199535-SuppTable1)	GeneSigDB	8	4.39528	1.30738	0.00215132	0.00475512	YES	*+	*+	*+			*+	++		*+	*+	*+
Human Cervical_Rosty05_814genes (15869706-TableS2)	GeneSigDB	8	4.3871	1.50632	0.00303252	0.00633703	YES	*+	++	++		*+	++	++		++	*+
REACTOME_PHASE_II_CONJUGATION	MSigDB_C2	8	4.38693	1.08848	0.00341951	0.00671006	YES	*+	*+	*+	*+	*+	*+				*+	*+
Human Breast_Chi06_123genes (16417408-Figure4)	GeneSigDB	8	4.38421	1.48985	0.00536181	0.00847942	YES	*+	*+	*+	*+	*+	*+	*+			*+
SENESE_HDAC3_TARGETS_DN	MSigDB_C2	8	4.38182	1.62903	0.00420414	0.00954684	YES	+*/*+	++/++			*+/*+	++/*+	++/++		*+/*+	*+/*+	**/*+
CAHOY_ASTROGLIAL	MSigDB_C6	8	4.37876	1.24801	0.00494058	0.0105311	YES	*+	-+	*+		-+	*+	-+		*+	*+
MODULE_100	MSigDB_C4	8	4.36457	2.05526	0.0075195	0.0172976	YES	*+	-+	*+	*+	-+	*+	-+			*+
MEISSNER_BRAIN_HCP_WITH_H3K4ME3_AND_H3K27ME3	MSigDB_C2	8	4.35912	1.94052	0.00310647	0.00715086	YES	-+	*+	*+		-+	*+	-+	*+		*+
Human Prostate_Hooi06_65genes_Top10Categories (16474848-Table2)	GeneSigDB	8	4.34623	1.26611	0.00428613	0.0068231	YES	*+	*+	*+		*+	*+	*+		*+	*+
GAUSSMANN_MLL_AF4_FUSION_TARGETS_E_UP	MSigDB_C2	8	4.34164	1.6555	0.00214235	0.00240017	YES	*+/**	*+/**	*+/**		-+/*+	*+/**	*+/**		*+/**	*+/*+
TGFB_UP.V1_UP	MSigDB_C6	8	4.33031	1.15593	0.000992414	0.00140804	YES	*+/*+	*+/**	*+/**		*+/**	*+/**	*+/*+	*+/**		*+/**
Mouse Lung_Lu06_856genes_Array MG_U74Av2 (16488994-SuppTable1a)	GeneSigDB	8	4.30892	1.40902	0.00551872	0.0117276	YES	*+	*+	*+		-+	*+	*+		*+	*+
Human Breast_Barry10_52genes (20368555-TS-3)	GeneSigDB	8	4.3066	1.24769	0.00581515	0.0106506	YES	*+	*+		*+	*+	*+	*+			*+	*+
VART_KSHV_INFECTION_ANGIOGENIC_MARKERS_UP	MSigDB_C2	8	4.29905	1.30901	0.00595055	0.0153223	YES	*+/**	*+/**	*+/*+		-+/-+	*+/*+	*+/-+		*+/*+	*+/**
Mouse Lung_Lu06_856genes_Array MEO430Av2 (16488994-SuppTable1b)	GeneSigDB	8	4.29892	1.36129	0.00475088	0.01001	YES	*+	*+	*+		-+	*+	*+		*+	*+
Human StemCell_Menicanin09_13genes (19224407-Table4)	GeneSigDB	8	4.28442	1.11921	0.00838142	0.0106412	YES	*+	*+	*+	*+	*+		*+		*+	*+
Myeloma_MS_subgroup_UP	SignatureDB	8	4.27683	1.20156	0.00588266	0.0129773	YES	*+/**	*+/+*	*+/**		-+/**	*+/**	*+/+*		*+/**	*+/**
Rat Viral_Sparmann04_52genes (14977634-Figure8b)	GeneSigDB	8	4.27109	1.67595	0.00987047	0.0141687	YES	*+	*+	*+		*+	*+	*+		*+	*+
Mouse StemCell_Ulloa-Montoya07_800genes (17683608-TableS3)	GeneSigDB	8	4.26709	1.60822	0.00365729	0.00669595	YES	++	++	++		*+	*+	++		*+	*+
AKT_UP.V1_DN	MSigDB_C6	8	4.26607	1.20811	0.0041142	0.00928701	YES	+*/*+	**/*+	**/*+		+*/*+	**/*+	**/*+	**/*+		**/*+
Human Lung_Hou10_1067genes (20421987-TableS1)	GeneSigDB	8	4.25503	1.57968	0.00231662	0.00496391	YES	*+	++	*+		-+	*+	*+		*+	*+
ZHENG_GLIOBLASTOMA_PLASTICITY_DN	MSigDB_C2	8	4.24815	1.72159	0.00925713	0.0154775	YES	**/*+	**/*+			**/*+	**/*+	++/*+	**/*+	**/*+	*+/*+
PID_FAK_PATHWAY	MSigDB_C2	8	4.2447	1.29073	0.00546618	0.0093989	YES		*+	*+		*+	*+	*+		*+	*+	*+
Human Ovarian_Li09_2322genes_cisplatinresistance (19505326-SuppTable3)	GeneSigDB	8	4.2267	1.74842	0.00288154	0.00583871	YES	++	++			++	++	++		++	++	++
Human Prostate_Hooi06_65genes_2FoldChange (16474848-SuppTable1)	GeneSigDB	8	4.22474	1.28677	0.00231927	0.00327652	YES	*+	++	*+		*+	*+	*+		*+	*+
Human Stomach_Subramanian04_49genes_PDGFRA mutant (15326474-Table2c)	GeneSigDB	8	4.22458	1.5918	0.00983659	0.015104	YES	*+	*+	*+			*+	*+	*+	*+	*+
YKACATTT_UNKNOWN	MSigDB_C3	8	4.22401	0.995614	0.00113794	0.00163993	YES		*+	++	++	*+		*+		++	*+	*+
CHEBOTAEV_GR_TARGETS_DN	MSigDB_C2	8	4.22287	1.44861	0.00272452	0.00312921	YES	**/*+	*+/*+			*+/-+	**/*+	*+/*+		*+/*+	*+/*+	**/*+
AMIT_EGF_RESPONSE_60_MCF10A	MSigDB_C2	8	4.21908	1.14628	0.00463377	0.00553378	YES	*+	*+		*+	*+	*+	*+		*+	*+
MIPS_POLYCYSTIN_1_MULTIPROTEIN_COMPLEX	MSigDB_C2	8	4.21448	1.08193	0.0109938	0.0101519	YES		*+	*+		*+	*+	*+	*+	*+		*+
FULCHER_INFLAMMATORY_RESPONSE_LECTIN_VS_LPS_UP	MSigDB_C2	8	4.21199	1.65283	0.00710986	0.0139969	YES	++/+*	++/+*			++/++	++/*+	++/+*	*+/**	++/**	++/*+
Human StemCell_Nilsson07_3153genes (17616640-TableS3)	GeneSigDB	8	4.20027	1.40243	0.00568639	0.014794	YES	++	++		*+	++		++		++	*+	++
Mouse Leukemia_Beckers05_110genes (15609325-SuppTable3)	GeneSigDB	8	4.19047	1.33234	0.00463308	0.00680799	YES	*+	*+	*+		*+	*+	*+		*+	*+
Human Uterine_Ferguson04_101genes (14766275-Fig.2)	GeneSigDB	8	4.18832	1.77803	0.00945966	0.0145971	YES	*+	*+	*+		*+	*+	*+		*+	*+
PILON_KLF1_TARGETS_UP	MSigDB_C2	8	4.17754	1.10447	0.00308816	0.0081224	YES	*+/++	*+/++	*+/+*		-+/++	*+/+*	*+/+-		*+/+*	-+/+*
PID_INTEGRIN5_PATHWAY	MSigDB_C2	8	4.16831	1.04204	0.00840634	0.0107372	YES	*+	*+	*+		*+	*+	*+		*+	*+
Human StemCell_Dekker06_439genes (16455954-TableS2)	GeneSigDB	8	4.16628	1.09335	0.00126042	0.00201137	YES	++	*+	*+		*+	*+	*+		*+	*+
Human Breast_Nuyten06_123genes_hypoxia (17069664-SuppTable3)	GeneSigDB	8	4.15369	1.51361	0.0101597	0.0182543	YES	*+	*+	*+	*+	*+	*+	*+			*+
NAKAMURA_TUMOR_ZONE_PERIPHERAL_VS_CENTRAL_DN	MSigDB_C2	8	4.15316	2.05656	0.0108817	0.0152837	YES	*+/++	++/*+		**/*+	*+/*+	*+/*+	++/++		*+/*+	*+/*+
GENTILE_UV_LOW_DOSE_DN	MSigDB_C2	8	4.13382	1.36042	0.00656662	0.00932621	YES	**/*+	**/*+			**/*+	**/*+	**/*+		**/*+	*+/*+	**/*+
SHETH_LIVER_CANCER_VS_TXNIP_LOSS_PAM1	MSigDB_C2	8	4.13073	1.11038	0.00350059	0.00659383	YES	*+	*+		*+	*+	*+	*+		*+		*+
Human Bladder_Buytaert08_832genes (17952126-SuppTable1)	GeneSigDB	8	4.12256	1.42028	0.00676248	0.0171583	YES	++	++			++	++	++		*+	*+	*+
BUYTAERT_PHOTODYNAMIC_THERAPY_STRESS_UP	MSigDB_C2	8	4.1099	1.33957	0.00481031	0.0115592	YES	++/+*	++/++			++/++	++/*+	++/+*		*+/*+	*+/+*	*+/**
PHONG_TNF_RESPONSE_VIA_P38_COMPLETE	MSigDB_C2	8	4.10981	1.31841	0.00566102	0.00861608	YES	++	*+			++	++	++		++	*+	*+
ZWANG_CLASS_2_TRANSIENTLY_INDUCED_BY_EGF	MSigDB_C2	8	4.09528	1.35802	0.00696397	0.00993872	YES	*+	*+		*+	*+	*+	*+		*+	*+
Human Colon_Lacroix05_114genes (15972966-TableS2a)	GeneSigDB	8	4.09463	0.981834	0.00445108	0.00653112	YES	*+	*+	*+		*+	*+	*+	++		*+
AZARE_NEOPLASTIC_TRANSFORMATION_BY_STAT3_DN	MSigDB_C2	8	4.08639	1.01126	0.00453721	0.0108662	YES	**/*+	**/++	**/++		**/*+	**/*+	**/*+		+*/*+	**/*+
Human Ovarian_Liu04_9genes (14996724-Table1Down)	GeneSigDB	8	4.08227	0.395913	0.00835765	0.00666771	YES	*+	*+	*+		*+	*+	*+		*+	*+
HOOI_ST7_TARGETS_DN	MSigDB_C2	8	4.08216	1.25133	0.00640715	0.0151566	YES	+*/*+	+*/*+	**/*+		**/*+	**/*+	**/*+		**/*+	*+/*+
Human Breast_Parker09_1918genes_IntrinsicGenes_Compilation (19204204-SupplementaryTable5)	GeneSigDB	8	4.07639	1.18742	0.00242511	0.00597657	YES	++	++			*+	++	++		++	++	++
ATF2_S_UP.V1_DN	MSigDB_C6	8	4.0736	1.7012	0.0029777	0.00399148	YES	**/-+	**/-+	**/*+		**/-+	**/*+	**/-+		**/*+	**/-+
REACTOME_SIGNALING_BY_PDGF	MSigDB_C2	8	4.06068	1.36359	0.00636471	0.0133801	YES	*+	*+	*+		*+	*+	++		*+	*+
Human Lymphoma_Rosenwald02_17genes (12075054-Table2)	GeneSigDB	8	4.05383	1.26795	0.0136857	0.01206	YES		*+	*+		*+	*+	*+		*+	*+	*+
Human Prostate_John-Aryankalayil09_2212genes (19139136-TableS3)	GeneSigDB	8	4.047	1.46528	0.00607675	0.0111088	YES	*+	++		++	*+	*+	*+		*+	*+
AATGTGA,MIR-23A,MIR-23B	MSigDB_C3	8	4.02848	0.712694	0.00139252	0.00332558	YES	*+	++		++	*+		++		*+	*+	++
ZHENG_BOUND_BY_FOXP3	MSigDB_C2	8	4.02666	1.06903	0.00599589	0.0153828	YES	++	++			++		++	*+	++	*+	++
Human Prostate_Best05_62genes (16203770-Table4)	GeneSigDB	8	4.0184	0.81058	0.00401801	0.00872596	YES	*+	*+	*+		*+	*+	*+		*+	-+
KRIGE_RESPONSE_TO_TOSEDOSTAT_6HR_UP	MSigDB_C2	8	4.01237	1.15084	0.00141461	0.00153696	YES		++/+-		++/+-	++/+*	++/+*	++/+-		++/+*	*+/+-	++/+*
REACTOME_DEVELOPMENTAL_BIOLOGY	MSigDB_C2	8	4.00735	1.43429	0.00515261	0.00976385	YES	*+	*+	*+		*+	*+	*+		*+	*+
Mouse Spleen_Shinnakasu08_27genes (18701459-Table1)	GeneSigDB	8	4.00267	0.803226	0.0109071	0.0117679	YES	*+	*+		*+		*+		*+	*+	*+	*+
B_cell_anergy_UP	SignatureDB	8	4.00021	1.25612	0.0171107	0.0214314	YES	*+/**	*+/**			*+/**		*+/**	*+/**	*+/**	*+/**	*+/**
CUI_TCF21_TARGETS_2_UP	MSigDB_C2	8	3.995	1.08702	0.00522609	0.0136391	YES	*+/++	*+/++	-+/++		*+/*+	*+/++	*+/++		*+/++	*+/*+
INTEGRIN_BINDING	MSigDB_C5	8	3.99324	1.16277	0.00526249	0.00578681	YES	*+	*+	*+		*+	*+	*+		*+	*+
MCBRYAN_PUBERTAL_BREAST_3_4WK_UP	MSigDB_C2	8	3.99212	1.42691	0.00409966	0.00868318	YES	*+/**	*+/**	*+/+*		-+/**	*+/**	*+/**	++/**		*+/*+
MCCLUNG_DELTA_FOSB_TARGETS_2WK	MSigDB_C2	8	3.96618	1.24811	0.00831983	0.0155868	YES	*+	*+	*+		-+	*+	*+		*+	*+
Human InVitro_Glesne06_217genes (16618722-SuppTable2)	GeneSigDB	8	3.96598	1.0597	0.00420065	0.00626045	YES	*+	*+	*+	*+	-+		*+		*+	*+
SYSTEM_DEVELOPMENT	MSigDB_C5	8	3.9425	1.93689	0.0111446	0.0173723	YES	-+	-+	*+		-+	-+	-+	*+	*+
ZHAN_MULTIPLE_MYELOMA_MS_UP	MSigDB_C2	8	3.94159	1.14105	0.00813246	0.0129703	YES	*+/**	*+/+*	*+/**		-+/**	*+/**	*+/+*		*+/**	*+/**
Human Leukemia_Schaefer04_38genes (15150091-Table3)	GeneSigDB	8	3.93352	1.12578	0.00960961	0.015012	YES	*+	*+		*+	*+	*+	*+	*+		*+
GRANDVAUX_IRF3_TARGETS_DN	MSigDB_C2	8	3.92538	1.15036	0.0170995	0.0223163	YES	**/*+	**/*+	**/*+		**/*+		**/*+		**/*+	**/*+	*+/*+
SESTO_RESPONSE_TO_UV_C2	MSigDB_C2	8	3.92287	1.13844	0.0087678	0.013548	YES	*+	++		*+	*+	*+	++			*+	*+
Human Colon_Watanabe06_33genes (16585155-Table1)	GeneSigDB	8	3.92153	1.19393	0.00908938	0.00993278	YES	*+	*+	*+		*+	*+	*+		*+	*+
Human Brain_Wong05_78genes (15665281-TableS2)	GeneSigDB	8	3.91923	1.41097	0.0111506	0.0150971	YES	*+	*+	*+		-+	*+	*+		*+	-+
Human Ovarian_Crijns09_2394Genes_17PathwayPredictor (19192944-TableS4)	GeneSigDB	8	3.91807	1.17491	0.00206511	0.00405129	YES	*+	*+	*+		-+	*+	*+		*+	*+
HELLER_HDAC_TARGETS_UP	MSigDB_C2	8	3.91294	1.62429	0.00648239	0.00852601	YES		*+/+*	-+/+*		*+/++	-+/++	*+/++		*+/+*	*+/++	*+/++
THUM_SYSTOLIC_HEART_FAILURE_UP	MSigDB_C2	8	3.91152	1.30991	0.00657052	0.013714	YES		++/*+	++/*+		*+/*+	*+/++	++/++		++/*+	*+/**	++/*+
OXYPHOS	SHIPP	8	3.90272	1.28932	0.00467419	0.00827451	YES	++	++		++	++	++			++	++	++
Mouse Viral_Cairo08_620genes (19061838-TableS13)	GeneSigDB	8	3.90152	1.18515	0.00808021	0.0165125	YES	*+	*+	*+		*+	*+	*+		*+	*+
CAIRO_HEPATOBLASTOMA_CLASSES_DN	MSigDB_C2	8	3.89624	1.03025	0.00430446	0.0093861	YES	+-/*+	+-/*+	**/*+		+-/*+	+-/*+	+-/*+		*-/*+	+-/*+
DASU_IL6_SIGNALING_SCAR_DN	MSigDB_C2	8	3.89149	1.09775	0.0113874	0.0117911	YES	**/*+	**/*+	**/*+		**/*+	**/*+	*+/*+			**/*+	**/*+
MODULE_220	MSigDB_C4	8	3.88556	2.207	0.0128313	0.0182585	YES	*+	-+	-+		-+	-+	-+	*+		-+
Human Sarcoma_Mason04_402genes (15489886-TableS1a)	GeneSigDB	8	3.85683	1.55529	0.0073692	0.0141815	YES	++	++			++	++	++		++	*+	++
EGFR_UP.V1_UP	MSigDB_C6	8	3.84885	1.32606	0.00906034	0.0152335	YES		*+/++	*+/**		*+/++	*+/*+	++/++		*+/*+	*+/++	++/++
MODULE_474	MSigDB_C4	8	3.84688	1.49634	0.0194656	0.0196131	YES	*+	*+	*+		*+	*+	*+	*+		*+
RAGHAVACHARI_PLATELET_SPECIFIC_GENES	MSigDB_C2	8	3.81531	1.19847	0.00772738	0.0110627	YES		*+	*+		*+	*+	*+		*+	*+	*+
Human Leukemia_Mullighan07_744genes (17597811-SuppTable5)	GeneSigDB	8	3.81437	1.23042	0.00957531	0.0183227	YES	++	++			++	*+	++	*+	++	*+
INGRAM_SHH_TARGETS_UP	MSigDB_C2	8	3.80778	1.15415	0.00691032	0.0109738	YES	*+/**	*+/*+	*+/*+	*+/**	*+/**	*+/**	*+/*+			*+/**
Human Breast_Abba05_183genes (15762987-SuppTable4)	GeneSigDB	8	3.80732	0.781715	0.00301106	0.0052723	YES	*+	*+	*+		*+		*+		*+	*+	*+
Human Leukemia_Schoch05_1052genes (15902281-TableS1a)	GeneSigDB	8	3.80615	1.10606	0.00622113	0.0130608	YES	-+	*+		-+	-+		-+		*+	-+	*+
Human StemCell_Song06_74genes (16574750-SuppTable2)	GeneSigDB	8	3.79389	1.41525	0.0092075	0.0105598	YES	*+	*+	*+		-+	*+	-+		*+	*+
BROWNE_HCMV_INFECTION_16HR_DN	MSigDB_C2	8	3.78416	1.08167	0.00624197	0.0073454	YES	+*/*+	+*/*+	**/*+		+*/*+	+*/*+	+*/*+		**/*+	+*/*+
Human StemCell_Ng08_33genes (18332228-Table2)	GeneSigDB	8	3.76468	1.37023	0.0126395	0.015517	YES	*+	*+	*+		*+	*+	*+		*+	*+
Human Liver_Liao08_600genes (18504433-SuppTable1)	GeneSigDB	8	3.76261	0.755931	0.00178831	0.00266666	YES	++	*+	*+		*+	*+	++	*+	*+
Human Bone_Heller08_324genes (18172295-SuppTable2)	GeneSigDB	8	3.76109	1.51279	0.0129136	0.0213678	YES		*+	*+		*+	-+	*+		*+	*+	*+
Human Immune_Kong10_79genes_Immune_Kong10_genes_ImmPort_CentrocytevsMemory (20460173-ImmPortCentrocytevsMemory)	GeneSigDB	8	3.75889	1.11624	0.00823946	0.0122793	YES	*+	*+			*+	*+	++		*+	*+	*+
Human Uterine_Matsumura06_67genes (16533762-Table1)	GeneSigDB	8	3.75619	1.15696	0.00795302	0.0130806	YES	*+	*+	*+		*+	*+	*+	*+		*+
Human HeadandNeck_Jarvinen06_223genes (16715129-SuppTable5)	GeneSigDB	8	3.74609	0.615902	0.00200071	0.00283522	YES	*+	++			*+	*+	*+		*+	*+	*+
Human Stomach_Yamashita06_16genes (16585221-Table1)	GeneSigDB	8	3.74242	1.18949	0.0191263	0.019454	YES	*+	*+			*+	*+	*+	*+	*+	*+
Human Ovarian_Biade06_22genes_benign (16969345-Table2Benign)	GeneSigDB	8	3.73681	1.18883	0.0126396	0.0154486	YES	*+	*+	*+		*+	*+	*+		*+	*+
Human pancreas_Missiaglia03_41genes (15305381-TableII)	GeneSigDB	8	3.7331	0.887929	0.00858403	0.0100892	YES		*+	*+		*+	*+	*+		*+	*+	*+
Mouse Breast_Wang04_34genes (15574765-Table1)	GeneSigDB	8	3.72646	1.04543	0.0137819	0.0174494	YES		*+	*+		*+	*+	*+		*+	*+	*+
BRUINS_UVC_RESPONSE_LATE	MSigDB_C2	8	3.7219	0.865504	0.00412541	0.00980416	YES	++	++	*+		++	*+			*+	*+	*+
Human Ovariain_Zhang05_58genes (16093247-Table1)	GeneSigDB	8	3.71933	1.3956	0.0132568	0.018298	YES	*+	*+	*+		-+	*+	-+		*+	*+
ALCALAY_AML_BY_NPM1_LOCALIZATION_UP	MSigDB_C2	8	3.71925	1.44645	0.0107329	0.0161444	YES	-+/*+	*+/++	*+/**		*+/*+	*+/**	*+/+*		*+/*+	*+/++
Human Pancreas_Nakamura04_43genes (14767473-Table1)	GeneSigDB	8	3.71601	1.12593	0.00893902	0.0122335	YES	*+	*+	*+		*+	*+	*+		*+	*+
Human Breast_Chen06_36genes (16951191-Table2)	GeneSigDB	8	3.71257	0.764919	0.00759542	0.00982728	YES	*+	*+	*+	*+	*+		*+			*+	*+
Rat Skin_Louro02_47genes (12384550-Table3)	GeneSigDB	8	3.71085	1.07611	0.0127127	0.0133622	YES		*+	*+		*+	*+	*+		*+	*+	*+
V$OCT_C	MSigDB_C3	8	3.71023	1.58419	0.00612362	0.00680499	YES	*+	*+	*+		*+	*+	*+		*+		*+
TTGCCAA,MIR-182	MSigDB_C3	8	3.70456	1.38465	0.00933207	0.0178443	YES	++	++			*+	++	++		++	*+	++
ZHAN_EARLY_DIFFERENTIATION_GENES_DN	MSigDB_C2	8	3.69814	1.1287	0.00816316	0.00928356	YES		**/*+		**/*+	+*/*+	+*/*+	**/++		**/*+	**/*+	**/*+
WANG_RESPONSE_TO_GSK3_INHIBITOR_SB216763_UP	MSigDB_C2	8	3.69364	1.21146	0.00656478	0.0101103	YES	*+/+*	*+/+*		*+/+*	*+/+*	*+/+*			++/+*	*+/+*	*+/+*
TATAAA_V$TATA_01	MSigDB_C3	8	3.68983	1.45957	0.00779956	0.0134235	YES	-+	-+	*+	*+	-+		*+		*+	-+
LIAO_METASTASIS	MSigDB_C2	8	3.68812	0.754204	0.00198281	0.00315091	YES	++	*+	*+		*+	*+	++	*+	*+
RYTTCCTG_V$ETS2_B	MSigDB_C3	8	3.67809	0.863841	0.00303079	0.00560222	YES	++	*+			*+	*+	++		*+	*+	*+
SMID_BREAST_CANCER_RELAPSE_IN_LUNG_DN	MSigDB_C2	8	3.66883	1.42029	0.011768	0.0109325	YES	**/*+	**/*+	**/*+				**/*+	**/*+	**/*+	**/*+	**/*+
Human Breast_Jones04_50genes_myoepithelial (15126339-Table1b)	GeneSigDB	8	3.66873	0.931777	0.00864089	0.00855743	YES		*+	*+		*+	*+	*+	*+	*+	*+
NAKAMURA_CANCER_MICROENVIRONMENT_UP	MSigDB_C2	8	3.65875	0.884167	0.00950212	0.0119255	YES	*+/++	*+/**	*+/**		*+/**	*+/**	-+/+*		*+/**	*+/**
IIZUKA_LIVER_CANCER_EARLY_RECURRENCE	MSigDB_C2	8	3.65763	0.842174	0.0173924	0.00963756	YES	*+	*+	*+	*+	*+		*+			*+	*+
LINDGREN_BLADDER_CANCER_CLUSTER_2A_DN	MSigDB_C2	8	3.65742	1.00489	0.00628764	0.00959496	YES	**/++	**/++			**/*+	**/*+	**/++		**/++	**/*+	**/++
Human Mouth_Whipple04_50genes (15280706-Table2)	GeneSigDB	8	3.64167	1.22395	0.0140831	0.0151211	YES	*+	*+	*+			*+	*+		*+	*+	*+
Human Leukemia_Erkeland06_68genes (16423987-SuppTable3g)	GeneSigDB	8	3.632	0.719646	0.00810235	0.0110246	YES		++		*+	*+	*+	++		*+	*+	++
Human StemCell_Kocer08_236genes (18667080-TableS8)	GeneSigDB	8	3.63028	1.31567	0.0122096	0.0182321	YES	*+	*+	*+		*+		++		*+	*+	*+
PID_EPHBFWDPATHWAY	MSigDB_C2	8	3.62753	0.712498	0.00704956	0.00760736	YES	*+	*+		*+	*+	*+	*+	*+			*+
Human Leukemia_McWeeney10_885genes (19837975-TableS1)	GeneSigDB	8	3.62556	1.13011	0.00486321	0.00809311	YES	*+	++			*+	++	++		*+	*+	++
VILIMAS_NOTCH1_TARGETS_UP	MSigDB_C2	8	3.62554	1.05535	0.0105382	0.0126145	YES	*+/**	*+/**		*+/**	*+/**		*+/**	*+/**		*+/**	++/**
KEEN_RESPONSE_TO_ROSIGLITAZONE_DN	MSigDB_C2	8	3.61329	1.3279	0.0107059	0.0143001	YES	**/++	**/++	**/++		**/*+	**/*+	**/++		**/*+	**/*+
Blood_Module-1.2_Platelets	SignatureDB	8	3.61267	1.37337	0.0145001	0.020407	YES		*+	*+		*+	*+	*+		*+	*+	*+
CHEN_LVAD_SUPPORT_OF_FAILING_HEART_UP	MSigDB_C2	8	3.61053	0.998896	0.00953623	0.012351	YES		++/**	*+/+*	*+/**	*+/**		*+/**	*+/**		*+/**	*+/+*
Mouse StemCell_Wotton08_50genes (18560354-Table1)	GeneSigDB	8	3.6075	0.668037	0.0057875	0.0058976	YES	*+	*+	*+		*+	*+	*+		*+	*+
MULLIGHAN_MLL_SIGNATURE_1_DN	MSigDB_C2	8	3.60285	1.34657	0.0083963	0.0116864	YES	+*/++	++/*+			*+/*+	*+/*+	+*/*+	**/*+		++/*+	**/*+
ZHANG_ADIPOGENESIS_BY_BMP7	MSigDB_C2	8	3.59422	0.804194	0.0181152	0.0133149	YES	*+	*+	*+	*+	*+		*+		*+		*+
Human Breast_Loi10_278genes (20479250-TableS4)	GeneSigDB	8	3.58911	0.632868	0.00307209	0.00369552	YES	*+	++		*+	*+		++		*+	*+	*+
PROTEIN_COMPLEX_BINDING	MSigDB_C5	8	3.58534	0.793576	0.00517213	0.00550817	YES	*+	*+	*+		*+	*+	*+		*+	*+
JAEGER_METASTASIS_UP	MSigDB_C2	8	3.58002	0.782634	0.00702856	0.0066757	YES	*+/-*	*+/-*	*+/*+		*+/-*	*+/*+	++/-+		*+/-*	*+/-*
NIELSEN_MALIGNAT_FIBROUS_HISTIOCYTOMA_UP	MSigDB_C2	8	3.56853	1.12526	0.0175885	0.0167539	YES	*+/**	*+/**	*+/**		*+/**	*+/+*	*+/**		*+/+*	*+/+*
BURTON_ADIPOGENESIS_7	MSigDB_C2	8	3.56579	0.83106	0.0102004	0.0113264	YES	*+	*+	*+		*+	*+	*+	*+		*+
ENGELMANN_CANCER_PROGENITORS_DN	MSigDB_C2	8	3.56488	1.32027	0.0126552	0.0160794	YES	*+/*+	*+/*+	**/*+		*+/-+		*+/-+		**/*+	*+/*+	**/*+
Mouse Uterine_Jeong05_296genes (15845616-SuppTable1)	GeneSigDB	8	3.56465	0.873762	0.00716261	0.0160947	YES	++	*+		*+	*+	*+	++	*+		*+
Human Leukemia_Juric07_85genes (17312329-SuppTable3)	GeneSigDB	8	3.56312	1.0714	0.0101551	0.0142747	YES	*+	*+	*+		++	++	++			*+	*+
Human Prostate_Chandran07_307genes (17430594-tableS3)	GeneSigDB	8	3.55743	1.24777	0.0077115	0.00904231	YES	*+	-+	*+		*+		*+		*+	*+	*+
Human Brain_Molenaar08_69genes (18413728-Table2a)	GeneSigDB	8	3.55198	1.11283	0.0116171	0.0136844	YES		*+	*+	*+	*+		*+		*+	*+	*+
Human Breast_Pothuri10_526genes (20436685-ST4-2)	GeneSigDB	8	3.54611	1.43073	0.00783699	0.00810669	YES		*+	*+		*+	*+	*+		*+	*+	*+
Human pancreas_Fidler07_50genes_InVivo (17210693-Table2)	GeneSigDB	8	3.53927	0.948257	0.0119704	0.0152681	YES	*+	*+	*+		*+	*+	*+		*+	*+
Human StemCells_Secco09_29genes (20058202-Table5)	GeneSigDB	8	3.53779	1.17667	0.0183726	0.0160814	YES	*+	*+		*+		*+	*+		*+	*+	*+
LEI_MYB_TARGETS	MSigDB_C2	8	3.53018	1.10121	0.00699933	0.00853989	YES	*+	*+			*+	*+	++		*+	*+	++
BIOCARTA_CTLA4_PATHWAY	MSigDB_C2	8	3.52714	1.35195	0.0217661	0.0215425	YES	*+	*+		*+	*+		*+	*+	*+		*+
CTGCAGY_UNKNOWN	MSigDB_C3	8	3.52333	1.36083	0.0106543	0.0172442	YES	*+	*+		*+	-+	*+	-+		*+	*+
Human StemCell_Mishra08_289genes (18519693-Table1)	GeneSigDB	8	3.50591	1.01496	0.0103312	0.0181423	YES	*+	*+			*+	*+	++		*+	*+	++
Human Embryo_Heim07_273genes (17880687-TableS4)	GeneSigDB	8	3.49812	1.53538	0.0156173	0.015812	YES		*+	*+		*+	*+	*+		*+	*+	++
Human Prostate_Chandran05_101genes_Tumor _v_AdjNormal (15892885-tableS1c)	GeneSigDB	8	3.47915	0.797453	0.00554102	0.00485595	YES	++	*+			++	*+	*+	*+	*+	*+
DAVIES_MULTIPLE_MYELOMA_VS_MGUS_DN	MSigDB_C2	8	3.47541	1.13263	0.0161474	0.0082365	YES		**/*+	**/++		**/*+	**/*+		**/*+	**/*+	**/*+	**/++
YAGI_AML_WITH_T_8_21_TRANSLOCATION	MSigDB_C2	8	3.45549	1.13783	0.00648052	0.00917614	YES	++	*+			*+	*+	++		*+	*+	*+
V$NKX25_01	MSigDB_C3	8	3.44995	1.17938	0.0125547	0.0143528	YES	*+	*+	*+	*+	*+		*+		*+		*+
BONOME_OVARIAN_CANCER_SURVIVAL_SUBOPTIMAL_DEBULKING	MSigDB_C2	8	3.44565	1.39415	0.0113874	0.0174527	YES	*+	*+	*+		*+		*+		*+	*+	*+
Human Leukemia_Takeda06_309genes (16818636-TableS2)	GeneSigDB	8	3.44047	0.681556	0.00612024	0.0110329	YES			*+	*+		*+	*+	*+	*+	*+	++
CONCANNON_APOPTOSIS_BY_EPOXOMICIN_UP	MSigDB_C2	8	3.43675	1.08781	0.0103937	0.0160112	YES	++/*+	*+/**			*+/*+	*+/**	++/**	*+/**		*+/**	*+/**
Human Leukemia_Calln08_1020genes (18362358-Table7)	GeneSigDB	8	3.42461	1.18282	0.00776467	0.0125285	YES	++	++		++	++	++			++	*+	++
KOYAMA_SEMA3B_TARGETS_UP	MSigDB_C2	8	3.41473	0.844416	0.00765306	0.0143223	YES	*+/*+	*+/*+		++/**	*+/-+	*+/-+	*+/*+			*+/*+	++/*+
MODULE_129	MSigDB_C4	8	3.41451	1.74968	0.0112085	0.014568	YES	-+	-+	-+	*+	-+	*+	*+			-+
Human Liver_Iizuka03_12genes (12648972-Panel3)	GeneSigDB	8	3.41278	0.82553	0.0226392	0.0128786	YES	*+	*+	*+	*+	*+		*+			*+	*+
Human StemCell_Udayakumar06_458genes (16574658-SuppTable1)	GeneSigDB	8	3.41026	1.2	0.00872402	0.0127696	YES	++	++			++	*+	++		++	*+	*+
BIOCARTA_CELL2CELL_PATHWAY	MSigDB_C2	8	3.40903	0.493335	0.0245744	0.0148247	YES		*+	*+	*+		*+	*+	*+	*+		*+
V$GATA1_05	MSigDB_C3	8	3.40803	1.0589	0.0102209	0.0148802	YES	*+	*+	*+	*+		*+	-+	-+	*+
IKEDA_MIR30_TARGETS_UP	MSigDB_C2	8	3.38327	0.485545	0.00493583	0.00656073	YES	*+/**	*+/**			*+/*+	*+/**	*+/**		*+/**	*+/**	++/**
LI_INDUCED_T_TO_NATURAL_KILLER_UP	MSigDB_C2	8	3.38002	1.22142	0.010147	0.0156519	YES	*+/*+	++/*+		*+/*+	*+/*+	*+/++	++/*+			*+/**	++/*+
Human Leukemia_Messina10_53genes (20564080-Table3)	GeneSigDB	8	3.37916	1.00147	0.0117383	0.0117129	YES	*+	*+			*+	*+	++		*+	*+	*+
BENPORATH_NOS_TARGETS	MSigDB_C2	8	3.37297	0.940178	0.00800037	0.00811335	YES		*+	*+		*+	*+	++		*+	*+	*+
GENTILE_UV_HIGH_DOSE_DN	MSigDB_C2	8	3.37034	0.940767	0.00729903	0.0112065	YES	*+/++	**/++		**/*+	**/++	**/++	*+/++			*+/*+	**/++
BOYLAN_MULTIPLE_MYELOMA_C_CLUSTER_DN	MSigDB_C2	8	3.35888	0.850695	0.0136123	0.0116269	YES	**/*+	**/*+		**/*+	**/*+	**/*+	+*/*+	**/*+		**/*+
WANG_HCP_PROSTATE_CANCER	MSigDB_C2	8	3.35464	1.02175	0.0142554	0.0199348	YES	*+	*+	*+		*+	*+	*+		*+	*+
LEF1_UP.V1_DN	MSigDB_C6	8	3.35009	0.91162	0.00811275	0.00954834	YES		*+/*+	++/*+		*+/*+	*+/*+	*+/*+		++/*+	*+/*+	**/*+
MOLENAAR_TARGETS_OF_CCND1_AND_CDK4_UP	MSigDB_C2	8	3.34075	1.26491	0.0162762	0.0147832	YES		*+/+*	*+/**	*+/**	*+/**		*+/**		*+/**	*+/**	*+/**
AAANWWTGC_UNKNOWN	MSigDB_C3	8	3.33966	1.45637	0.0124388	0.0132081	YES	*+	*+	*+	*+	*+	*+	*+		*+
TTTGTAG,MIR-520D	MSigDB_C3	8	3.33781	1.16187	0.0100078	0.0151171	YES	*+	*+	*+		*+		++		*+	*+	++
BLALOCK_ALZHEIMERS_DISEASE_INCIPIENT_UP	MSigDB_C2	8	3.33666	0.912994	0.00728445	0.0150659	YES	*+/**	*+/**	*+/**	*+/**	*+/**	*+/*+	++/+*			*+/**
Human Sarcoma_Missiaglia10_212genes (20502458-TableS6b)	GeneSigDB	8	3.33144	1.33368	0.016137	0.0178615	YES	-+	-+			*+	-+	-+		*+	-+	*+
Human Bone Marrow_Zhan03_50genes_earlyDiff (12393520-Table2)	GeneSigDB	8	3.32618	1.05005	0.0135822	0.0148185	YES		*+		*+	*+	++	++		*+	*+	*+
Human InVitro_Bild06_348genes (16273092-TableS1c)	GeneSigDB	8	3.32424	1.14161	0.0138466	0.0179752	YES	++	*+			*+	*+	*+		++	*+	++
Human Leukemia_Mullighan07_566genes (17597811-SuppTable7)	GeneSigDB	8	3.32038	1.06102	0.00866103	0.0132545	YES	++	++			++	++	++		*+	++	++
Human Leukemia_San Jose-Eneriz08_1151genes (18537972-TableS2)	GeneSigDB	8	3.31453	1.27173	0.0131791	0.0178314	YES	*+	*+		*+	-+	*+	*+		*+		*+
LENAOUR_DENDRITIC_CELL_MATURATION_UP	MSigDB_C2	8	3.30924	0.772045	0.0101579	0.0155308	YES		*+/**	++/**		*+/*+	*+/*+	++/++		++/**	*+/*+	++/++
Human Leukemia_Schoch05_1441genes (15902281-TableS1d)	GeneSigDB	8	3.3006	1.08368	0.00870727	0.0142392	YES	-+	-+	*+			*+	*+	-+	*+		*+
Human Breast_Creighton09_594genes (18425577-TableS3a)	GeneSigDB	8	3.28953	0.407657	0.00294792	0.00299717	YES	*+			*+	*+		*+	-+	*+	*+	*+
Mouse Liver_Jeong06_270genes (16423883-Table1S)	GeneSigDB	8	3.28813	0.895479	0.0102149	0.0166455	YES	*+	++		*+	*+	*+	++			*+	*+
MARTINEZ_TP53_TARGETS_DN	MSigDB_C2	8	3.28379	0.880906	0.00776928	0.011114	YES	*+/*+	*+/*+	*+/*+		*+/*+	**/*+	++/++	+*/*+			*+/*+
MODULE_179	MSigDB_C4	8	3.28262	0.909971	0.00798895	0.0138568	YES	*+	++		++	*+	++	++	*+			*+
V$CDX2_Q5	MSigDB_C3	8	3.28112	1.17994	0.0108473	0.0146293	YES	-+	*+	*+	*+	-+		-+		*+	-+
CATTTCA,MIR-203	MSigDB_C3	8	3.27723	0.910085	0.00874806	0.0147707	YES	*+	*+	*+		*+	*+	*+		*+		*+
LINDGREN_BLADDER_CANCER_CLUSTER_3_DN	MSigDB_C2	8	3.27344	0.976959	0.0104974	0.0132189	YES	++/*+		**/*+		+*/*+	*-/++	+-/++		**/*+	+-/*+	+*/*+
Human Leukemia_Andersson05_114genes (15843827-TableS7)	GeneSigDB	8	3.2693	0.769208	0.0111348	0.0112523	YES	*+	*+		*+	*+	*+		*+		*+	*+
Human Sarcoma_Henderson05_66genes (16168083-Table2)	GeneSigDB	8	3.25774	0.92351	0.0169274	0.0194802	YES	*+	*+	*+		-+	*+	-+		*+	*+
GTGCAAT,MIR-25,MIR-32,MIR-92,MIR-363,MIR-367	MSigDB_C3	8	3.25258	0.948829	0.00966776	0.0132755	YES	++	++	++		*+	++	++			*+	++
LIU_SMARCA4_TARGETS	MSigDB_C2	8	3.23881	1.14121	0.0168457	0.0161659	YES	-+	-+	*+		-+	*+	-+		*+	*+
V$FOXO4_01	MSigDB_C3	8	3.23511	0.899841	0.00955526	0.0149164	YES	*+	*+	*+		*+		*+		*+	*+	*+
Rat Immune_Molloy06_46genes (16514666-Table2)	GeneSigDB	8	3.23178	0.796613	0.0177233	0.0174416	YES	*+	*+	*+		*+	*+	-+		*+	*+
Human Pancreas_Fukushima05_20genes_Parenchyma (15791284-Table2)	GeneSigDB	8	3.22916	0.551641	0.0146076	0.0168069	YES	*+	*+		*+	*+	*+	*+		*+	*+
TGCTTTG,MIR-330	MSigDB_C3	8	3.20057	0.499786	0.00485756	0.00566913	YES	*+	*+			*+	++	*+		*+	*+	*+
GRAHAM_CML_DIVIDING_VS_NORMAL_QUIESCENT_DN	MSigDB_C2	8	3.19742	0.715544	0.0108688	0.0125248	YES	**/*+	+*/++			**/*+	**/*+	+*/*+		**/*+	+*/*+	+*/++
MCBRYAN_PUBERTAL_BREAST_6_7WK_UP	MSigDB_C2	8	3.19354	0.835306	0.00904519	0.009148	YES		*+/*+	*+/**		*+/**	*+/**	++/+*		*+/+*	++/*+	*+/**
ATGTACA,MIR-493	MSigDB_C3	8	3.19211	0.626399	0.00557244	0.00557809	YES	++	++	*+		*+	*+	++		*+		*+
MODULE_255	MSigDB_C4	8	3.19143	0.936961	0.00949472	0.012123	YES	++	*+		++	*+	++	++	*+			*+
MODULE_459	MSigDB_C4	8	3.18657	0.926112	0.0113989	0.0172495	YES	++	++		++		++	++	*+	*+		++
SMIRNOV_RESPONSE_TO_IR_6HR_UP	MSigDB_C2	8	3.16938	0.729546	0.0107108	0.0144991	YES	++/*+	++/++	*+/++	*+/+*	*+/++	*+/++			*+/++	*+/++
ACEVEDO_LIVER_CANCER_WITH_H3K27ME3_UP	MSigDB_C2	8	3.16828	0.864041	0.009689	0.0113338	YES	-+/**		*+/**		-+/**	*+/**	-+/++		*+/**	*+/+*	*+/**
SHETH_LIVER_CANCER_VS_TXNIP_LOSS_PAM3	MSigDB_C2	8	3.15578	0.659802	0.0122303	0.011802	YES	*+	*+	*+		-+	*+	*+		*+	*+
MODULE_378	MSigDB_C4	8	3.14839	0.95713	0.0116563	0.0167521	YES	++	++		++	*+	++	++	*+			++
TTTGCAC,MIR-19A,MIR-19B	MSigDB_C3	8	3.1408	1.25503	0.0116152	0.0114789	YES	++	++	*+		++	++	++		++	*+
SMID_BREAST_CANCER_RELAPSE_IN_BONE_UP	MSigDB_C2	8	3.13998	1.00284	0.0144565	0.0155155	YES	*+/**	-+/**		*+/**	*+/-+	*+/**	-+/*+	*+/**			*+/**
BROWNE_HCMV_INFECTION_6HR_DN	MSigDB_C2	8	3.13595	0.730528	0.0126281	0.0159511	YES	*+/*+	*+/++	**/*+	**/*+	*+/*+		**/*+		**/++		**/++
YAGI_AML_FAB_MARKERS	MSigDB_C2	8	3.12838	0.837682	0.0112845	0.0133529	YES	++	*+			*+		*+	*+	*+	*+	*+
Human Breast_Kim06_33genes_UpRegulated (17178900-Table1a)	GeneSigDB	8	3.12754	0.640233	0.0176485	0.0136154	YES		*+	*+	*+	*+	*+	*+		*+	*+
CTTTGCA,MIR-527	MSigDB_C3	8	3.11635	0.93873	0.0113515	0.0114287	YES	++	++		++	++	*+	*+		*+		*+
YAMASHITA_LIVER_CANCER_STEM_CELL_UP	MSigDB_C2	8	3.10012	0.772048	0.0173389	0.013752	YES	*+/**	*+/**	*+/**	*+/**	*+/**	*+/*+	*+/**		*+/**
PASQUALUCCI_LYMPHOMA_BY_GC_STAGE_DN	MSigDB_C2	8	3.09021	0.562173	0.00887249	0.0103917	YES	++/++	++/++	+*/*+	+*/++	++/*+		+*/++	+*/*+			+*/++
TGATTTRY_V$GFI1_01	MSigDB_C3	8	3.06913	0.943053	0.0115106	0.0161659	YES	-+	*+	*+		-+	*+	-+	*+	*+
JAATINEN_HEMATOPOIETIC_STEM_CELL_DN	MSigDB_C2	8	3.05994	0.601366	0.00935495	0.0131205	YES		++/++		++/*+	*+/*+	*+/++	++/++	**/*+		*+/*+	*+/++
TTGCACT,MIR-130A,MIR-301,MIR-130B	MSigDB_C3	8	3.05611	0.95223	0.0139058	0.0166961	YES	*+	*+	*+		*+	++	*+		*+	*+
V$RP58_01	MSigDB_C3	8	3.05457	0.906451	0.0121946	0.0159045	YES	*+	*+	*+		*+	++	*+		*+	*+
MIKKELSEN_IPS_ICP_WITH_H3K4ME3_AND_H327ME3	MSigDB_C2	8	3.04218	0.606028	0.0111087	0.00956706	YES	-+	-+	*+	*+	*+		-+	*+	*+
MODULE_248	MSigDB_C4	8	3.02224	0.956919	0.0138582	0.0106027	YES	*+	-+	*+		-+	-+	*+			-+	*+
Mouse Kidney_Takemoto06_177genes_cat3 (16498405-TableS5)	GeneSigDB	8	3.02207	0.663044	0.0115116	0.0109673	YES	*+	*+	*+		-+	-+	*+		*+	-+
Human Lung_Mikkonen10_416genes (20035825-TableS7a)	GeneSigDB	8	3.02128	0.950764	0.0133948	0.0129499	YES		*+	*+	*+	*+	*+	*+		*+	-+
VERHAAK_GLIOBLASTOMA_PRONEURAL	MSigDB_C2	8	3.0201	1.03055	0.0164275	0.0186524	YES	*+	*+		*+	*+	*+	*+			*+	*+
AKL_HTLV1_INFECTION_DN	MSigDB_C2	8	3.01194	0.674207	0.0165294	0.0165813	YES	**/*+	**/++	**/*+	**/*+	**/*+		**/*+			**/*+	**/*+
YNGTTNNNATT_UNKNOWN	MSigDB_C3	8	2.99465	0.838031	0.0126188	0.016303	YES	-+	*+	*+	*+		*+	*+		*+	-+
AAAGACA,MIR-511	MSigDB_C3	8	2.98999	0.752047	0.0120884	0.0116571	YES	*+	*+	*+		*+		*+		*+	*+	*+
Human Leukemia_Gross09_279genes (19567819-SuppTable1)	GeneSigDB	8	2.98559	0.912426	0.0136612	0.0150564	YES	*+	*+	*+		*+	*+	*+			*+	*+
Mouse Viral_Politi04_40genes_UpRegulated (14695345-Table1a)	GeneSigDB	8	2.97912	0.81838	0.0221487	0.0145803	YES	*+	*+	*+		*+	*+	*+		*+	*+
Human Lymphoma_Sriuranpong04_670genes_Epithelium(N)Metaplastic_DisplasticLesions(R)Carcinoma(T) (15297395-SuppTable1)	GeneSigDB	8	2.97441	0.871024	0.0114785	0.0132414	YES	++	*+	*+		*+		++		*+	*+	*+
GGGTGGRR_V$PAX4_03	MSigDB_C3	8	2.96089	1.24747	0.0141491	0.0139989	YES	*+	-+	*+		-+	*+	*+		*+	*+
Mouse Lung_Rangasamy09_248genes (19286929-SuppTable2i)	GeneSigDB	8	2.96008	0.423455	0.00888801	0.00950991	YES	*+	++		++	*+	++	*+			*+	*+
CHIARADONNA_NEOPLASTIC_TRANSFORMATION_KRAS_UP	MSigDB_C2	8	2.95953	0.461581	0.0114744	0.0131018	YES	*+/*+	*+/*+	*+/*+		*+/*+	*+/*+	++/*+			*+/*+	*+/*+
GENTILE_UV_RESPONSE_CLUSTER_D8	MSigDB_C2	8	2.93018	0.556441	0.0203109	0.0157404	YES		*+	*+		*+	*+	*+		*+	*+	*+
MULLIGHAN_NPM1_SIGNATURE_3_UP	MSigDB_C2	8	2.92909	1.42472	0.0218735	0.0190291	YES	*+/+*	++/**			*+/*+	*+/+*	++/++		*+/**	*+/**	*+/+*
DEURIG_T_CELL_PROLYMPHOCYTIC_LEUKEMIA_UP	MSigDB_C2	8	2.90223	0.615487	0.00920794	0.00771011	YES		*+/++	*+/+*	*+/+*	++/++	*+/+*	++/+*	*+/**			*+/++
IL15_UP.V1_DN	MSigDB_C6	8	2.8889	1.04297	0.0139036	0.00851312	YES		+*/*+		+*/*+	**/-+	+*/*+	**/-+	+*/*+	+*/*+	*+/-+
Human HeadandNeck_Dysvik06_73genes (16489063-Table2)	GeneSigDB	8	2.87387	0.744969	0.0205451	0.0185757	YES	*+	*+	*+		*+	*+	*+		*+	*+
Mouse Bone_Boylan07_47genes (17483317-Table1)	GeneSigDB	8	2.86672	0.569355	0.0214909	0.0168972	YES	*+	*+			*+		++	*+	*+	*+	++
TURASHVILI_BREAST_DUCTAL_CARCINOMA_VS_DUCTAL_NORMAL_DN	MSigDB_C2	8	2.86049	1.18648	0.021433	0.0190792	YES	*+/*+		*+/*+		*+/-+	*+/*+	*+/*+	**/*+	*+/*+	*+/-+
IVANOVA_HEMATOPOIESIS_STEM_CELL_LONG_TERM	MSigDB_C2	8	2.84417	0.782506	0.0146994	0.0147875	YES	*+	*+			*+	*+	*+	*+		-+	*+
Cell_cycle_Cho	SignatureDB	8	2.82082	0.789201	0.0143951	0.0169358	YES	++	*+	*+	*+	++	*+	++			++
SATO_SILENCED_BY_METHYLATION_IN_PANCREATIC_CANCER_1	MSigDB_C2	8	2.81839	0.772591	0.0130664	0.0112542	YES	*+	*+			-+	*+	*+	*+	*+	*+
Human StemCell_Chau09_160genes (19190338-SuppTable1)	GeneSigDB	8	2.81004	0.727086	0.0160898	0.0134595	YES	*+	*+		*+	*+	*+	*+		*+	*+
MARTINEZ_TP53_TARGETS_UP	MSigDB_C2	8	2.7879	0.526125	0.0102218	0.0105559	YES	*+/*+	*+/*+	*+/*+		*+/*+		++/++		*+/**	*+/**	*+/*+
GTGGGTGK_UNKNOWN	MSigDB_C3	8	2.78454	0.512932	0.0100015	0.00649168	YES	-+	*+	-+		*+	*+	-+		*+	-+
V$NKX62_Q2	MSigDB_C3	8	2.78405	0.577136	0.0138207	0.0148136	YES	-+	*+		*+	-+	*+	*+		*+	*+
PID_CXCR4_PATHWAY	MSigDB_C2	8	2.76266	0.38107	0.0167649	0.0125714	YES	*+			*+	*+	*+	*+	*+	*+		*+
GRAESSMANN_APOPTOSIS_BY_DOXORUBICIN_DN	MSigDB_C2	8	2.75125	1.23638	0.0196829	0.0180005	YES	+*/++	++/++	+*/++		*+/++	*+/++	+*/++		**/++	*+/++
Human Breast_Wang05_469genes_down_BT-BAF57cells (16135788-Table24)	GeneSigDB	8	2.74033	0.831738	0.0196947	0.0210859	YES	++	++			++	*+	++		*+	*+	++
Human Lymphoma_Martinez-Climent03_431genes (12406872-Table4)	GeneSigDB	8	2.70943	0.416032	0.0132016	0.0112622	YES	++	++	*+	*+	*+	*+				++	*+
Mouse StemCell_Schimmer06_1554genes (16484322-SuppTable3)	GeneSigDB	8	2.70675	2.0958	0.00866748	0.0107837	NO	++	++			++	*+		*-	++	++	++
V$OCT1_01	MSigDB_C3	8	2.66433	0.58885	0.0157593	0.0145012	YES	*+	*+	*+		*+	*+	*+		*+	*+
Human Leukemia_Horcajadas06_146genes (16735486-Table1)	GeneSigDB	8	2.65955	0.333768	0.0163508	0.0108384	YES	*+	*+			*+		*+	*+	*+	*+	*+
Human StemCell_Dekker06_600genes (16455954-TableS1)	GeneSigDB	8	2.65888	1.95814	0.00736704	0.0104959	NO		*+	*+	*-	*+	*+	*+		*+	*+
BHAT_ESR1_TARGETS_VIA_AKT1_UP	MSigDB_C2	8	2.65396	0.65354	0.0175807	0.0164415	YES	*+/**	++/**	*+/**	*+/**	*+/**	*+/**	*+/*+	*+/**
V$ICSBP_Q6	MSigDB_C3	8	2.65114	0.318538	0.0130911	0.00824795	YES	*+	*+		++		*+	*+		*+	*+	*+
Human Bone_Heller08_693genes (18172295-SuppTable4)	GeneSigDB	8	2.61266	0.4964	0.0155361	0.0148396	YES		++	++		++	++	++	++		++	++
GGGNNTTTCC_V$NFKB_Q6_01	MSigDB_C3	8	2.56713	0.46983	0.0214443	0.0165374	YES	*+	*+			*+	*+	*+	*+	*+	*+
MCBRYAN_PUBERTAL_BREAST_5_6WK_DN	MSigDB_C2	8	2.56592	0.426493	0.0217053	0.0146157	YES		*+/*+	**/*+		**/*+	**/*+	*+/++		*+/*+	**/++	*+/*+
Human Breast_Barry10_1022genes (20368555-TS-1)	GeneSigDB	8	2.50249	0.63791	0.0191569	0.0173516	YES	++	++		*+	++	*+			++	*+	*+
PROTEIN_DOMAIN_SPECIFIC_BINDING	MSigDB_C5	8	2.49694	0.349998	0.0296873	0.0143792	YES	*+	*+	*+	*+	*+				*+	*+	*+
Human Brain_Lu06_285genes (16424041-SuppTable2)	GeneSigDB	8	1.75098	1.50221	0.0295984	0.0155137	NO	++		*+	*+	*+		++	*-		*+	*+
REACTOME_METABOLISM_OF_MRNA	MSigDB_C2	8	-2.15458	0.35901	0.0191905	0.0149901	YES			*-	*-	+-	*-	+-	*-	*-	*-
MOREAUX_MULTIPLE_MYELOMA_BY_TACI_DN	MSigDB_C2	8	-2.21727	0.32807	0.0161051	0.015414	YES		*+/+-			-*/+-	*+/*-	-+/+-	-*/*-	**/*-	-*/*-	-*/+-
MODULE_54	MSigDB_C4	8	-2.29419	0.571915	0.0193489	0.0204782	YES		+-	*-		*-	*-	+-		*-	+-	*-
Blood_Module-3.7_Undetermined	SignatureDB	8	-2.33986	0.718913	0.0165127	0.0141129	YES		+-	*-		+-	*-	+-	*-		*-	*-
REACTOME_TRANSCRIPTION	MSigDB_C2	8	-2.36766	0.404652	0.0111135	0.010551	YES		+-			+-	*-	+-	+-	*-	+-	*-
MORF_EIF3S2	MSigDB_C4	8	-2.36936	0.593627	0.0134585	0.0141372	YES			*-	*-	+-	*-	+-	*-	*-	+-
REACTOME_METABOLISM_OF_RNA	MSigDB_C2	8	-2.41174	0.415873	0.00894025	0.00846716	YES			*-	*-	+-	*-	+-	*-	*-	*-
PENG_RAPAMYCIN_RESPONSE_DN	MSigDB_C2	8	-2.54762	0.724172	0.0128795	0.0153799	YES	*+/+-	*+/+-	**/+-		*+/+-		++/+-		*+/*-	++/+-	*+/+-
SCGGAAGY_V$ELK1_02	MSigDB_C3	8	-2.95347	1.3841	0.013546	0.0169276	YES			+-	*-		*-	+-	*-	*-	+-	*-
Human Lymphoma_Piccaluga07_64genes (17304354-Table5s)	GeneSigDB	7	8.97402	1.8137	1.60516e-06	4.1323e-06	YES		-+	*+		-+	*+	*+		*+	-+
JI_CARCINOGENESIS_BY_KRAS_AND_STK11_DN	MSigDB_C2	7	7.82746	2.07232	1.4683e-05	3.32002e-05	YES	**/*+	**/*+	**/*+		**/*+	**/*+	**/*+			**/*+
Lymph_node_DLBCL_survival	SignatureDB	7	6.44594	1.65504	0.00208226	0.00346384	YES	*+	*+	*+		*+	*+			*+	*+
STEGER_ADIPOGENESIS_DN	MSigDB_C2	7	6.26857	2.19438	0.00406072	0.0107153	YES	**/*+	**/*+	**/*+		**/*+	**/*+	**/*+			**/*+
Mouse Skin_Hagendoorn06_54genes (16585153-Table1)	GeneSigDB	7	5.99365	2.04714	8.39602e-05	8.75812e-05	YES	*+	*+	*+		*+	*+	-+			*+
URS_ADIPOCYTE_DIFFERENTIATION_DN	MSigDB_C2	7	5.98133	1.88613	0.000666434	0.00154931	YES	*+/*+	**/*+	*+/*+		**/*+	**/*+	**/*+			**/*+
BERTUCCI_MEDULLARY_VS_DUCTAL_BREAST_CANCER_DN	MSigDB_C2	7	5.87837	1.73907	0.000551785	0.00129616	YES	+*/-+	+*/*+	+-/*+		+*/-+	+*/*+	+*/-+		+*/*+
HOSHIDA_LIVER_CANCER_SUBCLASS_S1	MSigDB_C2	7	5.69094	1.90169	0.00104738	0.0025358	YES	++	++	++		*+	*+	++			*+
HIF1alpha_2x_UP	SignatureDB	7	5.68201	1.09932	6.39655e-05	9.84167e-05	YES	*+/**	-+/+*	*+/**		-+/*-	*+/**	*+/+*			-+/+*
Human Bladder_Nicholson04_20genes_Loss (15520187-Table2b)	GeneSigDB	7	5.50195	2.0013	0.00227094	0.00383246	YES		*+			*+	*+	*+		*+	*+	*+
MISHRA_CARCINOMA_ASSOCIATED_FIBROBLAST_UP	MSigDB_C2	7	5.36438	1.69165	0.00241331	0.00566205	YES	*+/**	*+/**			*+/**	*+/**	-+/*+		*+/**	*+/**
Human Breast_Ellsworth09_27genes (19112599-Table2a)	GeneSigDB	7	5.34292	1.6985	0.00191573	0.00421996	YES	*+	*+	*+		-+	*+	-+			*+
SENESE_HDAC3_TARGETS_UP	MSigDB_C2	7	5.14288	1.23182	0.000176584	0.000327625	YES		++/++	++/**		*+/*+	++/*+	++/++		*+/*+	*+/*+
Mouse StemCell_Si06_111genes (16581771-tableS1a)	GeneSigDB	7	5.08025	1.3028	0.00428033	0.010876	YES		*+	*+		*+		*+	*+	*+	*+
REACTOME_NCAM1_INTERACTIONS	MSigDB_C2	7	5.06859	1.50458	0.00580197	0.0146772	YES		*+	*+		*+	*+	*+		*+	*+
GCB_gt_ABC_LC	SignatureDB	7	5.05332	0.94644	0.0300894	0.0192822	YES		*+	*+	*+			*+		*+	*+	*+
BASSO_HAIRY_CELL_LEUKEMIA_DN	MSigDB_C2	7	4.98857	2.13075	0.00727766	0.0154397	YES		**/*+	**/*+		**/*+	**/*+	**/*+		**/*+	**/*+
BROWNE_HCMV_INFECTION_24HR_DN	MSigDB_C2	7	4.957	1.86295	0.00402032	0.00693268	YES	**/*+	**/*+			*+/*+	+*/*+	**/*+		**/*+	**/*+
LEE_NEURAL_CREST_STEM_CELL_UP	MSigDB_C2	7	4.91893	1.27493	0.000618047	0.00100514	YES		*+/*+	*+/**		-+/**	-+/**	*+/*+		*+/**	-+/**
RUIZ_TNC_TARGETS_UP	MSigDB_C2	7	4.85364	0.98005	0.00153863	0.0039242	YES		*+/+*	*+/**		*+/+*	*+/**	*+/+*		*+/**	*+/+*
Mouse Lung_not_cancer_Fink02_9genes (11786402-Table3)	GeneSigDB	7	4.84317	1.42887	0.00447103	0.00474277	YES	*+	*+	*+		*+	*+	*+		*+
Endothelial_precursor_GNF	SignatureDB	7	4.82705	1.5906	0.00244352	0.00472109	YES	*+	*+	*+		*+	*+	*+			*+
Human Liver_Nakagawa04_91genes (15326482-Table2)	GeneSigDB	7	4.80752	1.13415	0.0020868	0.00516456	YES	*+	*+	*+		*+	*+	*+			-+
Human Bone_Prieur04_86genes (15282325-Table1)	GeneSigDB	7	4.7604	1.48606	0.00455376	0.0102156	YES		*+	*+		*+	*+	*+		*+	*+
ENK_UV_RESPONSE_EPIDERMIS_DN	MSigDB_C2	7	4.72953	1.45079	0.00470724	0.0123036	YES	++/++	++/++			**/++	*+/++	+*/++		**/*+	+*/*+
Human Lymphoma_Melendez05_4229genes (15656903-SuppTable1)	GeneSigDB	7	4.69201	0.960359	0.000257354	0.00060997	YES	++	++	*+		*+	*+	++			*+
Human Kidney_Sugimura04_30genes_MesoblasticNephromaVsWilmsTumors (15302496-Table2)	GeneSigDB	7	4.68532	1.67734	0.0075239	0.0148705	YES	*+	*+	*+		*+	*+	*+			*+
Human Breast_Moon08_20genes_C2 (18922970-Table1b)	GeneSigDB	7	4.66242	1.45686	0.00736493	0.0135006	YES	*+	*+	*+		*+		*+			*+	*+
Human pancreas_Jimeno07_39genes (17363501-Table2)	GeneSigDB	7	4.64753	1.3724	0.00291926	0.00461599	YES	*+	*+	*+		*+	*+	*+			*+
Human Breast_Marella09_11genes_GeneCodingProtein (19584277-Table3)	GeneSigDB	7	4.60726	1.7687	0.010403	0.0119587	YES	*+	*+	*+		*+	*+	*+			*+
Human Lung_Xi05_50genes (15930348-Table2)	GeneSigDB	7	4.60635	1.23191	0.00191755	0.00220024	YES	*+	*+	*+		*+	*+			*+	*+
Mouse Skin_Driskell09_1322genes (19605494-TableS1)	GeneSigDB	7	4.59166	2.25282	0.00394389	0.00923773	YES	*+	*+	*+		-+	*+	*+			*+
MODULE_137	MSigDB_C4	7	4.58367	1.96062	0.00234024	0.00571607	YES	*+	-+	*+		-+	*+	-+			*+
NIELSEN_GIST_VS_SYNOVIAL_SARCOMA_UP	MSigDB_C2	7	4.58084	0.968085	0.00284871	0.00328712	YES	*+/**	*+/**			*+/**	*+/**	*+/**		*+/**	*+/**
Human Breast_Yang05_39genes (16144925-Table1)	GeneSigDB	7	4.57266	0.92119	0.00248148	0.0032173	YES		*+	*+		*+	*+	*+			*+	*+
Human Kidney_Myers04_21genes (15231654-Table3)	GeneSigDB	7	4.56393	1.17958	0.0032592	0.00368853	YES	*+	*+	*+		*+	*+	*+			*+
REACTOME_INTEGRIN_CELL_SURFACE_INTERACTIONS	MSigDB_C2	7	4.52595	1.03042	0.00118974	0.00157913	YES		*+	*+		-+	*+	*+		*+	*+
Human Colon_Lacroix05_93genes (15972966-Table1C)	GeneSigDB	7	4.50892	1.12006	0.00674128	0.0169759	YES		*+		*+	*+	*+	*+	*+		*+
Human Leukemia_Durig03_14genes (12456497-Table3)	GeneSigDB	7	4.49551	0.999404	0.00396191	0.00340898	YES	*+	*+			*+		*+		*+	*+	*+
LI_WILMS_TUMOR_VS_FETAL_KIDNEY_2_DN	MSigDB_C2	7	4.48795	1.11297	0.00270501	0.0040767	YES		**/*+	*+/*+		**/*+	**/*+	**/*+		**/*+	**/*+
SKELETAL_DEVELOPMENT	MSigDB_C5	7	4.46854	1.49985	0.00253316	0.00424474	YES		*+	*+		-+	*+	-+		*+	-+
Human Lung_not_cancer_Ning04_8genes (15469929-Table2)	GeneSigDB	7	4.46617	1.49706	0.00873964	0.00524232	YES	*+	*+	*+		*+		*+	*+		*+
KRIEG_HYPOXIA_NOT_VIA_KDM3A	MSigDB_C2	7	4.44899	2.06168	0.00838076	0.0154791	YES	++	++		*+	*+	*+	++			*+
PID_UPA_UPAR_PATHWAY	MSigDB_C2	7	4.41998	1.76676	0.00597893	0.00792923	YES		*+	*+		-+	*+	*+		*+	*+
Human StemCell_Ng08_62genes (18332228-TableS5)	GeneSigDB	7	4.39014	1.04046	0.00223914	0.0031118	YES	*+	*+	*+		*+	*+	*+			*+
WU_CELL_MIGRATION	MSigDB_C2	7	4.38451	1.39428	0.00503127	0.0114234	YES		++	*+		*+	*+	*+		*+	*+
TING_SILENCED_BY_DICER	MSigDB_C2	7	4.38443	1.57707	0.00497141	0.00648689	YES		*+	*+		*+		*+	*+	*+	*+
Human StemCell_Nuytten08_2072genes (17724462-TableS2)	GeneSigDB	7	4.3704	1.14729	0.00197035	0.00483361	YES	++	++			++	++	++		++	++
WAMUNYOKOLI_OVARIAN_CANCER_GRADES_1_2_DN	MSigDB_C2	7	4.36855	1.06928	0.00284419	0.00374278	YES	+*/*+	**/*+	**/*+		**/*+		**/*+		**/*+	**/-+
MARSON_FOXP3_TARGETS_UP	MSigDB_C2	7	4.36358	1.14731	0.00533822	0.0111346	YES	*+/+*	*+/+*		*+/+*	*+/+-	*+/+*				*+/**	*+/+*
CERVERA_SDHB_TARGETS_2	MSigDB_C2	7	4.36279	1.82964	0.00935138	0.0171531	YES	*+	*+			-+	*+	-+		*+	-+
Serum_response_Fb_DN	SignatureDB	7	4.33306	1.37088	0.00395197	0.00865006	YES	+*/*+	+*/*+			+*/*+	**/*+	+*/*+		**/++	+*/*+
RIZ_ERYTHROID_DIFFERENTIATION_6HR	MSigDB_C2	7	4.3329	1.06391	0.00424791	0.00603733	YES	*+	*+	*+	*+		*+	*+				*+
Human Brain_Tso06_58genes (16397228-Table3)	GeneSigDB	7	4.31253	1.10322	0.00216642	0.00249584	YES	*+	*+	*+		*+	*+	*+			*+
MULTICELLULAR_ORGANISMAL_DEVELOPMENT	MSigDB_C5	7	4.30441	1.83051	0.00231385	0.00366024	YES	-+	-+	*+		-+	*+	-+		*+
Human Brain_Blum05_23genes (15705901-Table1)	GeneSigDB	7	4.30064	1.22151	0.0112796	0.0186738	YES		*+	*+		*+	*+	*+		*+	*+
HUANG_DASATINIB_RESISTANCE_UP	MSigDB_C2	7	4.29965	2.06547	0.00569273	0.00826101	YES		*+/**	*+/**		*+/**	*+/**	*+/*+		*+/**	*+/**
Human StemCell_West07_71genes (17234769-TableS4b)	GeneSigDB	7	4.29206	1.39575	0.00873164	0.0169602	YES		*+			*+	*+	*+	*+		*+	*+
CHANG_POU5F1_TARGETS_UP	MSigDB_C2	7	4.28885	1.61076	0.00839707	0.00939221	YES	*+/**	*+/**	*+/**		*+/**	*+/**	*+/**			*+/**
ZHU_SKIL_TARGETS_UP	MSigDB_C2	7	4.26535	1.03963	0.00479433	0.00507922	YES	*+/*+	*+/**	*+/**		*+/**	*+/*+			*+/**	*+/**
Human Lung_Singh04_53genes (14525759-Table2)	GeneSigDB	7	4.2563	1.28124	0.00546895	0.0112335	YES	*+	*+	*+		*+	*+	*+			*+
Human StemCell_Seo07_61genes (18034892-Table1)	GeneSigDB	7	4.23539	1.88906	0.00666554	0.00809057	YES	*+	*+	*+		*+		*+		*+	*+
HAMAI_APOPTOSIS_VIA_TRAIL_UP	MSigDB_C2	7	4.23151	1.24501	0.00192059	0.00413469	YES	++/+*	++/+*		++/**			++/**		++/**	*+/**	*+/**
Human Lymphoma_Ando03_37genes (14556665-Table2)	GeneSigDB	7	4.2195	1.40358	0.0070012	0.00711468	YES	*+	*+		*+		*+	++			++	++
Human HeadandNeck_Roepman05_16genes (15640797-Table1)	GeneSigDB	7	4.19681	1.85591	0.0170461	0.0197108	YES			*+		*+	*+	*+		*+	*+	*+
Human StemCell_Harris08_490genes (19074870-SuppTable4a)	GeneSigDB	7	4.19588	1.47709	0.00269762	0.00369613	YES	*+	*+	*+		-+	*+	-+			-+
Human Breast_Lee07_7genes (17640171-Table3)	GeneSigDB	7	4.19211	0.768406	0.009977	0.00925641	YES	*+	*+	*+		*+	*+	*+				*+
Human Lymphoma_Valet04_24genes (15170602-Table3)	GeneSigDB	7	4.18556	1.49597	0.0178515	0.0205862	YES	*+		*+	*+	*+		*+	*+	*+
Human Breast_Harvell_99genes (16239301-Table2)	GeneSigDB	7	4.16127	1.34015	0.00746581	0.0113434	YES		*+		*+	*+	*+	*+			*+	*+
LANDIS_ERBB2_BREAST_TUMORS_324_UP	MSigDB_C2	7	4.1364	1.1233	0.00298126	0.00613159	YES	++/*+	++/*+			*+/*+	*+/*+	*+/*+			*+/*+	*+/+*
GAUSSMANN_MLL_AF4_FUSION_TARGETS_F_UP	MSigDB_C2	7	4.1324	1.45227	0.00565561	0.00973268	YES		*+/*+	*+/**		-+/-+	*+/*+	*+/**	*+/**		-+/*+
WEINMANN_ADAPTATION_TO_HYPOXIA_DN	MSigDB_C2	7	4.11793	1.17584	0.00581287	0.00925979	YES		*+/*+	*+/*+		**/*+	*+/*+	*+/*+		*+/*+	*+/*+
Human Leukemia_Gutierrez05_19genes (15674361-SuppTable2)	GeneSigDB	7	4.08824	1.10533	0.0089709	0.0139152	YES	*+	*+				*+	*+	*+		*+	*+
TONKS_TARGETS_OF_RUNX1_RUNX1T1_FUSION_SUSTAINED_IN_GRANULOCYTE_DN	MSigDB_C2	7	4.06997	0.792713	0.0117947	0.00937468	YES		**/*+		+*/*+	*+/*+	*+/*+	**/*+			**/*+	**/*+
FRASOR_TAMOXIFEN_RESPONSE_DN	MSigDB_C2	7	4.06364	0.946578	0.0107955	0.00955261	YES	**/*+	*+/*+	**/*+	**/*+	*+/*+		*+/*+				**/*+
ACCTGTTG_UNKNOWN	MSigDB_C3	7	4.06282	0.84805	0.00405991	0.0100915	YES	*+	*+		*+	-+	*+	-+		*+
EXTRACELLULAR_MATRIX_STRUCTURAL_CONSTITUENT	MSigDB_C5	7	4.05052	1.16265	0.00753324	0.0126601	YES	*+	*+	*+		-+	*+	-+			*+
Human Intestine_Jinawath04_153genes (15273739-SuppTable1)	GeneSigDB	7	4.03221	1.24566	0.00462153	0.00841647	YES	*+	*+	*+		*+	*+			*+	*+
HOELZEL_NF1_TARGETS_DN	MSigDB_C2	7	4.02164	1.30494	0.00570844	0.0109663	YES	*+/*+	*+/*+	++/*+		*+/*+	*+/*+	*+/-+			*+/*+
WATANABE_RECTAL_CANCER_RADIOTHERAPY_RESPONSIVE_DN	MSigDB_C2	7	4.00588	1.19566	0.00618913	0.0084156	YES	+*/*+	**/*+	**/*+		+*/*+	**/*+			**/*+	**/*+
CHANG_CORE_SERUM_RESPONSE_DN	MSigDB_C2	7	4.00567	1.087	0.00375853	0.00723783	YES	+*/*+	+*/*+			+*/*+	**/++	+*/*+		**/++	+*/*+
ONKEN_UVEAL_MELANOMA_DN	MSigDB_C2	7	3.99665	0.776811	0.0019533	0.0045473	YES		++/++			*+/++	*+/++	++/++		++/*+	*+/++	++/++
ACEVEDO_FGFR1_TARGETS_IN_PROSTATE_CANCER_MODEL_DN	MSigDB_C2	7	3.996	1.28332	0.00200849	0.00238425	YES	**/*+	**/*+	+*/*+		**/-+	**/*+	**/-+		**/*+
DASU_IL6_SIGNALING_DN	MSigDB_C2	7	3.99237	0.954516	0.0179838	0.0133422	YES	**/*+		**/*+			*+/*+	**/*+		**/*+	*+/*+	**/*+
RUTELLA_RESPONSE_TO_CSF2RB_AND_IL4_DN	MSigDB_C2	7	3.99225	2.35594	0.0151672	0.0206944	YES	++/++	++/++			++/++	*+/++	++/++			*+/*+	++/++
Human Breast_Huang07_161genes (17332353-Table2)	GeneSigDB	7	3.97753	1.51301	0.00860682	0.0163455	YES		*+	*+		*+	*+	*+		*+	++
PICCALUGA_ANGIOIMMUNOBLASTIC_LYMPHOMA_DN	MSigDB_C2	7	3.97147	1.27141	0.00383921	0.00490819	YES	-+/*+	-+/*+		*-/*+	-+/*+		*+/++			-+/*+	**/++
Human Stomach_Subramanian04_49genes_KITexon11mutant (15326474-Table2a)	GeneSigDB	7	3.968	1.10487	0.00480098	0.00364889	YES	*+	*+	*+		*+		-+	*+			*+
Human Skin_Alonso07_41genes (17409456-Table3)	GeneSigDB	7	3.96595	1.29023	0.00909701	0.0134528	YES	*+	*+	*+		*+	*+	*+			*+
Human StemCell_Matushansky08_69genes (18310505-Table1)	GeneSigDB	7	3.9423	1.02613	0.00661989	0.012678	YES	*+	*+	*+		*+	*+	*+			*+
DAVICIONI_MOLECULAR_ARMS_VS_ERMS_UP	MSigDB_C2	7	3.93558	1.33042	0.00411029	0.00706065	YES	*+/*+	*+/*+		*+/**	*+/*+	*+/-+	*+/-+				*+/**
Human Prostate_Ashida04_98genes (15342375-Table4)	GeneSigDB	7	3.91567	0.87907	0.00370971	0.00494288	YES		*+	*+		*+	*+	*+		*+	*+
ULE_SPLICING_VIA_NOVA2	MSigDB_C2	7	3.90049	0.914308	0.00884753	0.0180843	YES	*+	-+	*+		*+	*+	*+				*+
NADLER_OBESITY_UP	MSigDB_C2	7	3.88834	1.19754	0.00648502	0.0105553	YES	*+/**	*+/**	*+/**		*+/**	*+/*+				*+/**	*+/**
ALONSO_METASTASIS_EMT_UP	MSigDB_C2	7	3.88312	0.703683	0.00358711	0.00262751	YES	*+/**	*+/**	*+/**		*+/**	*+/**	*+/*+			*+/**
Human Breast_Parker09_412genes_IntrinsicGenes_Perou2000 (19204204-SupplementaryTable2)	GeneSigDB	7	3.88094	1.42761	0.00389297	0.00742367	YES		*+	*+		*+	*+	*+		*+	*+
Human Intestine_Vozenin-Brotons04_119genes (14982484-Table3)	GeneSigDB	7	3.88011	1.24274	0.00533057	0.00689528	YES	*+	*+	*+		*+	*+	++			*+
CTTTAAR_UNKNOWN	MSigDB_C3	7	3.86887	0.773957	0.00118645	0.00247091	YES	*+	*+	*+		*+	*+	*+			*+
GARY_CD5_TARGETS_UP	MSigDB_C2	7	3.84376	1.46929	0.0044133	0.00693354	YES	++/+*	++/+*			++/+*	++/+*		*+/+*	++/**		++/+*
Human StemCell_Nilsson07_3742genes (17616640-TableS1)	GeneSigDB	7	3.84106	0.788968	0.000954154	0.00159915	YES	++	++		*+	++				*+	++	++
ELVIDGE_HIF1A_AND_HIF2A_TARGETS_DN	MSigDB_C2	7	3.83184	1.04529	0.00751309	0.0133637	YES		+*/*+		**/*+	**/*+	**/*+	+*/*+			++/-+	+*/*+
TGANTCA_V$AP1_C	MSigDB_C3	7	3.82585	1.28502	0.00477245	0.0114844	YES	*+	*+			*+	*+	*+			*+	*+
SU_THYMUS	MSigDB_C2	7	3.82326	1.30427	0.0130463	0.0142334	YES	*+	*+		*+		*+	*+			*+	*+
Tcell_cytokine_repressed	SignatureDB	7	3.81901	0.674838	0.00689546	0.00915144	YES	*+	*+		*+	*+		*+		*+		++
Human Breast_Jansen05_81genes (15681518-Figure2)	GeneSigDB	7	3.81153	1.19745	0.00626477	0.00662821	YES	*+	*+	*+		*+	*+	*+		*+
Human Brain_Potter09_66genes (19523942-Table1)	GeneSigDB	7	3.80399	0.590942	0.00306508	0.00293072	YES	*+	*+	*+		*+	*+	*+		*+
MODULE_105	MSigDB_C4	7	3.80169	0.911438	0.00315839	0.00458197	YES	*+	*+	*+		*+	*+	++			++
MAHADEVAN_GIST_MORPHOLOGICAL_SWITCH	MSigDB_C2	7	3.76427	1.38	0.0166193	0.0174809	YES	*+		*+		*+		*+		*+	*+	*+
PEREZ_TP53_AND_TP63_TARGETS	MSigDB_C2	7	3.76313	1.52925	0.00591801	0.00875213	YES	*+	*+	*+		*+		*+		*+	*+
Human Leukemia_Staber04_58genes (14749762-Table2)	GeneSigDB	7	3.76211	1.01445	0.00780274	0.0132747	YES	*+	*+			*+	*+	*+		*+	*+
HIRSCH_CELLULAR_TRANSFORMATION_SIGNATURE_DN	MSigDB_C2	7	3.75373	0.788272	0.00438137	0.00619589	YES		+*/*+	+-/*+		++/*+	+*/*+	+*/*+		+*/*+	++/*+
Human Leukemia_Langer08_174genes (18378853-TableS1)	GeneSigDB	7	3.7441	0.340758	0.00232102	0.00214011	YES	*+	*+	*+	*+			++		*+		*+
CATTGTYY_V$SOX9_B1	MSigDB_C3	7	3.74039	1.28526	0.00391007	0.00668128	YES	*+	*+			*+	*+	*+		++	*+
DACOSTA_ERCC3_ALLELE_XPCS_VS_TTD_DN	MSigDB_C2	7	3.73726	1.19189	0.00602143	0.00509124	YES	**/*+	**/*+	**/*+		**/*+	**/*+	**/*+			**/*+
Human Lymphoma_Piccaluga07_214genes (18006812-TableS2)	GeneSigDB	7	3.71638	1.5275	0.0104946	0.0133497	YES	*+	*+		*+	*+		++			*+	*+
SCHLOSSER_SERUM_RESPONSE_DN	MSigDB_C2	7	3.71418	0.888147	0.00296934	0.00466917	YES	*+/++	**/++		**/*+	*+/++				+*/*+	+*/-+	**/*+
Human Breast_Chen06_56genes (16951191-Table3)	GeneSigDB	7	3.71299	1.25317	0.00923259	0.00989075	YES		*+	*+		*+	*+	*+		*+	*+
KYNG_DNA_DAMAGE_DN	MSigDB_C2	7	3.71266	0.899593	0.00470445	0.00903742	YES	**/*+	**/++	**/*+		*+/*+		**/++			*+/*+	**/++
GOZGIT_ESR1_TARGETS_UP	MSigDB_C2	7	3.70748	1.00249	0.00991965	0.017883	YES			*+/*+		*+/-+	*+/++	*+/*+	*+/*+	*+/*+	*+/*+
MODULE_524	MSigDB_C4	7	3.70019	1.35503	0.0157382	0.0191681	YES	++	*+			*+	*+	*+		*+	*+
Human Breast_Lee06_71genes_up_VitD3 (16737686-Table1)	GeneSigDB	7	3.69725	1.00498	0.00989698	0.0172315	YES	*+	*+			*+		*+	*+	*+	*+
MODULE_321	MSigDB_C4	7	3.69467	1.10455	0.00605219	0.00785384	YES		*+	*+		*+	*+	*+			*+	*+
Human Leukemia_Whitney09_50genes_1-50UpRegulated (18637760-SuppTable1)	GeneSigDB	7	3.69303	1.06862	0.0102439	0.0129407	YES	-+	*+			-+	*+	-+	*+			*+
MTOR_UP.N4.V1_DN	MSigDB_C6	7	3.69032	1.20875	0.00622606	0.0068812	YES	+*/*+	+*/*+	+*/*+	+*/*+			+*/*+			**/*+	+*/*+
PID_ECADHERIN_STABILIZATION_PATHWAY	MSigDB_C2	7	3.68607	0.711178	0.00616298	0.00916835	YES	*+		*+		*+	*+	-+		*+	*+
Mouse Breast_Wang04_8genes (15574765-Table2)	GeneSigDB	7	3.68223	0.656056	0.0186793	0.0155843	YES	*+		*+		*+	*+	*+		*+	*+
FRIDMAN_SENESCENCE_UP	MSigDB_C2	7	3.67823	0.805275	0.00509121	0.00681229	YES	*+/**	*+/*+	*+/**		*+/**	*+/**	*+/**			-+/*+
ORGAN_DEVELOPMENT	MSigDB_C5	7	3.675	1.19337	0.00711051	0.0115683	YES		-+	*+		-+	-+	-+		*+	-+
NIKOLSKY_BREAST_CANCER_8Q12_Q22_AMPLICON	MSigDB_C2	7	3.66902	0.793333	0.00325721	0.0032497	YES	*+	*+		*+			*+		*+	*+	*+
Mouse Lung_Rangasamy09_55genes (19286929-SuppTable2p)	GeneSigDB	7	3.66698	1.11167	0.00940647	0.0110212	YES	*+	*+			*+	*+	*+		*+		*+
Human Breast_Bonnefoi07_202genes (18024211-Webtable1)	GeneSigDB	7	3.66395	0.856441	0.00370155	0.00649561	YES	*+	*+			*+	*+	*+		*+	*+
CLAUS_PGR_POSITIVE_MENINGIOMA_DN	MSigDB_C2	7	3.64504	0.838615	0.0149958	0.0159177	YES	**/*+	**/*+			**/*+	**/*+	**/*+			**/*+	**/*+
MIKKELSEN_ES_ICP_WITH_H3K4ME3_AND_H3K27ME3	MSigDB_C2	7	3.63507	0.967522	0.00676402	0.0134111	YES	-+	*+	*+	*+		*+	-+		*+
DURCHDEWALD_SKIN_CARCINOGENESIS_DN	MSigDB_C2	7	3.63196	0.999053	0.00282828	0.00309375	YES	**/++	*+/*+			**/*+	**/*+	**/*+		**/*+	**/*+
CTATGCA,MIR-153	MSigDB_C3	7	3.62871	1.30319	0.00720424	0.0105	YES	*+	++			*+	*+	++	*+		*+
DAVICIONI_PAX_FOXO1_SIGNATURE_IN_ARMS_UP	MSigDB_C2	7	3.62848	0.912096	0.00740453	0.00824566	YES	*+/**	*+/**		++/**	-+/*+	*+/**	*+/*+		*+/**
Mouse Kidney_Takemoto06_208genes_cat5 (16498405-TableS7)	GeneSigDB	7	3.62377	0.934265	0.00584055	0.00872494	YES		*+	*+		*+	*+	*+	*+		*+
Rat Heart_Lara-Pezzi09_1421genes (20559987-TableS1)	GeneSigDB	7	3.62066	0.980233	0.00312451	0.0041114	YES	++	++	*+		++	*+	++			*+
Human Stomach_Meireles04_42genes (14973074-Table2)	GeneSigDB	7	3.61334	1.41226	0.0161556	0.0217601	YES		*+	*+		*+	*+	*+		*+	*+
GC_T_helper_up_Chtanova_and_Kim	SignatureDB	7	3.59676	0.81195	0.0128158	0.0131392	YES	*+	*+			*+	*+			*+	*+	*+
MTOR_UP.V1_DN	MSigDB_C6	7	3.58129	1.06447	0.00616496	0.00914778	YES		+*/*+	**/*+	+*/-+	*-/*+	*-/*+	+*/-+	**/*+
Human Ovarian_Bonome08_572genes (18593951-TableS3)	GeneSigDB	7	3.57907	1.36783	0.00747088	0.00990151	YES		*+	*+		*+		*+		*+	*+	*+
V$SRF_Q6	MSigDB_C3	7	3.57782	0.799549	0.00617968	0.0143075	YES	*+	*+			-+	*+	*+		*+	*+
BILD_HRAS_ONCOGENIC_SIGNATURE	MSigDB_C2	7	3.57365	1.21684	0.0126143	0.019131	YES		*+			*+	*+	*+		++	*+	++
LAMELLIPODIUM	MSigDB_C5	7	3.57351	0.843366	0.0100313	0.00793013	YES	*+				*+	++	*+	*+		*+	*+
Human Breast_Hendricks04_71genes_BRG1_up (14673169-TableA1-1)	GeneSigDB	7	3.57177	1.44664	0.0149525	0.017284	YES	*+	*+	*+		*+	*+	*+			*+
Human StemCell_Hao09_97genes (20077526-TableS7)	GeneSigDB	7	3.57044	0.816294	0.00683867	0.00974266	YES	*+	*+			*+		*+		*+	*+	*+
KANG_DOXORUBICIN_RESISTANCE_DN	MSigDB_C2	7	3.56675	0.767606	0.0153638	0.0179169	YES	**/*+	**/*+			**/*+	**/*+			**/*+	**/*+	**/*+
Human Brain_Ruano08_50genes (18260157-Table3)	GeneSigDB	7	3.55958	1.30162	0.0162542	0.01802	YES	*+	*+			*+	*+	++			*+	*+
Rat StemCell_Stemmer07_134genes (17483316-Table2)	GeneSigDB	7	3.55855	0.692612	0.00754939	0.0157881	YES		*+	*+		*+	*+	*+		*+	*+
Human StemCell_Brendel05_21genes (16355723-table2a)	GeneSigDB	7	3.55382	0.6969	0.0129716	0.0160425	YES	*+	*+	*+		*+	*+			*+	*+
Human Lymphoma_Bohling08_64genes (17720243-Table1A)	GeneSigDB	7	3.55135	1.29118	0.0167503	0.0212199	YES		*+	++		*+	*+	++		*+	*+
Human StemCell_Davicioni06_81genes (16849537-Table1)	GeneSigDB	7	3.54468	1.26709	0.0135706	0.0176494	YES	*+	*+		++	*+	*+	*+		*+
Human Breast_Bertucci06_534genes (16651414-Supp3)	GeneSigDB	7	3.53948	1.16904	0.00897642	0.0137157	YES		++	++		++	++	++		++	*+
Mouse StemCell_Forsberg05_220genes (16151515-TableS2)	GeneSigDB	7	3.53353	0.560198	0.00387325	0.0049316	YES		*+	*+		-+	*+	-+			-+	*+
JECHLINGER_EPITHELIAL_TO_MESENCHYMAL_TRANSITION_DN	MSigDB_C2	7	3.52874	1.5715	0.0179706	0.0187099	YES		*+/*+	*+/*+		*+/*+	*+/*+	*+/*+		*+/*+	*+/*+
BURTON_ADIPOGENESIS_10	MSigDB_C2	7	3.51985	0.892483	0.0136939	0.0177736	YES		*+			*+	*+	*+		*+	*+	*+
Human Prostate_Ashida04_41genes (15342375-Table3)	GeneSigDB	7	3.51495	0.650757	0.0104663	0.0125761	YES	*+	++				*+	*+	*+		*+	*+
MARKEY_RB1_CHRONIC_LOF_DN	MSigDB_C2	7	3.50355	1.03257	0.00780631	0.0121476	YES	**/*+	**/++	**/*+		**/*+	*+/*+	*+/*+			**/*+
MODULE_33	MSigDB_C4	7	3.50204	1.36986	0.00958924	0.01332	YES		*+	*+		-+	-+	*+	*+		*+
Human Kidney_IbanezDeCaceres06_28genes (16707423-Table1)	GeneSigDB	7	3.49939	0.739134	0.0110946	0.00891489	YES	*+	*+	*+		*+	*+			*+	*+
Human Breast_Teschendorff07_193genes_Erpos (17683518-193GeneTable)	GeneSigDB	7	3.49379	1.35418	0.0143701	0.0204336	YES	*+	*+	*+		*+				*+	*+	*+
POTTI_ADRIAMYCIN_SENSITIVITY	MSigDB_C2	7	3.48707	0.832239	0.010066	0.0157732	YES	*+	*+			-+	*+	*+		*+	*+
Human Bladder_Ewis06_44genes (17349526-Table2)	GeneSigDB	7	3.47244	0.814146	0.0103709	0.00947801	YES	*+	*+	*+		*+	*+	*+		*+
ZHOU_INFLAMMATORY_RESPONSE_LIVE_UP	MSigDB_C2	7	3.47025	0.996772	0.0058007	0.0072065	YES		*+/*+	*+/**		-+/**	*+/**	*+/**		*+/**	*+/*+
PAX5_repressed	SignatureDB	7	3.46999	0.792617	0.00924424	0.0142005	YES		*+	*+	*+	*+		*+	*+			*+
MOHANKUMAR_TLX1_TARGETS_DN	MSigDB_C2	7	3.46629	1.01323	0.00888125	0.0127308	YES	+*/*+	++/*+	**/*+		++/-+	**/-+	+*/-+		**/*+
MODULE_99	MSigDB_C4	7	3.46313	1.31725	0.0109492	0.0173885	YES	-+	-+	*+			*+	-+	*+	*+
V$E4BP4_01	MSigDB_C3	7	3.46158	0.52164	0.0029188	0.00336938	YES	*+	*+		*+	*+	*+	*+		*+
HADDAD_T_LYMPHOCYTE_AND_NK_PROGENITOR_UP	MSigDB_C2	7	3.45233	0.82948	0.0092349	0.0150167	YES	*+/++	*+/*+	*+/+*		*+/**	*+/**	*+/**			*+/**
Human StemCell_Hao09_173genes (20077526-TableS5)	GeneSigDB	7	3.45107	0.694849	0.005285	0.00580935	YES	*+	*+			*+		++		*+	*+	++
GAVIN_FOXP3_TARGETS_CLUSTER_P7	MSigDB_C2	7	3.44695	1.41624	0.0145064	0.0138872	YES		*+	*+		*+	*+	*+	++		*+
Mouse Breast_Wright08_416genes (18394172-S4GeneList)	GeneSigDB	7	3.44257	0.63891	0.00368252	0.00591433	YES		*+	*+		-+	*+	*+		*+	*+
CELL_MATRIX_JUNCTION	MSigDB_C5	7	3.44133	0.577883	0.0185526	0.0190665	YES		*+	*+		*+	*+	*+			*+	*+
WIERENGA_STAT5A_TARGETS_DN	MSigDB_C2	7	3.44064	1.2234	0.0101561	0.0139185	YES	+*/*+	+*/*+			**/*+	*+/*+	*+/*+		**/*+	*+/*+
Human Leukemia_Verhaak05_50genes (16109776-Table3)	GeneSigDB	7	3.43533	1.28067	0.0153336	0.0158214	YES	*+				*+	*+		*+	*+	*+	*+
REACTOME_NETRIN1_SIGNALING	MSigDB_C2	7	3.43033	0.836513	0.0130873	0.0175139	YES	*+	*+	*+		*+	*+	-+			*+
Human Lung_Fromigue03_28genes (14627989-Table2)	GeneSigDB	7	3.43014	0.913501	0.0137563	0.0105217	YES		*+	*+		*+	*+	*+		*+	*+
SMID_BREAST_CANCER_LUMINAL_B_UP	MSigDB_C2	7	3.42926	1.40611	0.0124194	0.0165644	YES	*+/*+	*+/*+		*+/*+			*+/++	*+/*+	*+/*+		*+/++
HUANG_FOXA2_TARGETS_UP	MSigDB_C2	7	3.42916	0.770621	0.0099423	0.013047	YES	*+/**	*+/**	*+/*+		*+/**	*+/*+	*+/*+			*+/*+
V$SRF_Q4	MSigDB_C3	7	3.42682	0.776656	0.00438502	0.00557378	YES	*+	*+			-+	*+	*+		*+	*+
Human Breast_Naderi07_200genes (16936776-GeneList)	GeneSigDB	7	3.42324	1.42737	0.0108608	0.0162318	YES	*+	*+	*+		*+	*+			*+	*+
Human Prostate_Chandran07_154genes (17430594-table4)	GeneSigDB	7	3.41753	1.09108	0.0121823	0.0179936	YES	*+	*+	*+		*+		*+		*+	*+
AAAYRNCTG_UNKNOWN	MSigDB_C3	7	3.414	1.16922	0.0107482	0.0159566	YES		*+	*+		*+	*+	*+		*+	*+
Human ProteinKinases_Frevel03_425genes (12509443-Table2)	GeneSigDB	7	3.40807	0.773054	0.00441301	0.00578055	YES	++	++		*+	++				*+	*+	++
TAKEDA_TARGETS_OF_NUP98_HOXA9_FUSION_3D_UP	MSigDB_C2	7	3.40677	0.977192	0.00652173	0.00517424	YES			*+/**	*+/**		*+/**	*+/**	*+/**	*+/**	*+/**
Human StemCell_Lim08_25genes (18510698-Table2)	GeneSigDB	7	3.39825	1.00634	0.0196769	0.0196275	YES					*+	*+	*+	*+	*+	*+	++
SPIRA_SMOKERS_LUNG_CANCER_UP	MSigDB_C2	7	3.38303	0.70395	0.0139993	0.0188342	YES	*+/**	*+/**		*+/**	*+/**		*+/**			*+/**	*+/**
KANG_AR_TARGETS_DN	MSigDB_C2	7	3.37977	1.53478	0.0284023	0.0193275	YES	**/*+	**/*+	*+/*+			*+/*+	*+/*+		**/*+		**/*+
GGGAGGRR_V$MAZ_Q6	MSigDB_C3	7	3.3768	0.971533	0.00727307	0.0141113	YES	*+	-+	*+		-+	*+	*+		*+
TGFbeta_epithelial_large_UP	SignatureDB	7	3.37445	0.714876	0.00920164	0.0143113	YES	*+/**	*+/**	*+/**		*+/+*	*+/+*	*+/**			*+/**
Human Viral_Pazienza08_88genes (18803589-Table2)	GeneSigDB	7	3.37374	0.806732	0.0103209	0.0133115	YES		*+	*+		*+	*+	++			*+	*+
Human StemCell_Kocer08_575genes (18667080-TableS9)	GeneSigDB	7	3.37025	1.01782	0.0054575	0.0060555	YES	++	++	*+		*+		++		*+	*+
Human StemCell_Jaatinen06_86genes (16210406-table1)	GeneSigDB	7	3.35392	1.15014	0.0124609	0.013073	YES	*+	*+	*+		*+		++	*+	*+
Human Ovarian_Wood03_445genes (12734205-TableS2)	GeneSigDB	7	3.35293	1.37559	0.0112191	0.0163952	YES	*+	++			*+	*+	++		*+	*+
TBK1.DF_UP	MSigDB_C6	7	3.34148	1.5246	0.0186215	0.0193572	YES		++/++	++/**	++/**	++/*+		++/+*			*+/**	++/*+
LENAOUR_DENDRITIC_CELL_MATURATION_DN	MSigDB_C2	7	3.33513	1.9008	0.0200068	0.0181469	YES	+*/*+				*+/*+	*+/*+	++/++	**/*+		*+/*+	++/++
Human Leukemia_Chiaretti05_63genes (16243790-Table2)	GeneSigDB	7	3.32714	0.77146	0.0130776	0.0169292	YES				*+	*+	*+	*+	*+	*+		*+
MODULE_532	MSigDB_C4	7	3.32613	1.03877	0.00925229	0.012321	YES	++	++		++		++	++	*+			++
BIOCARTA_ACH_PATHWAY	MSigDB_C2	7	3.3226	0.625468	0.0230877	0.0181541	YES	*+			*+	*+		*+	*+	*+		*+
Human Liver_Chan09_15genes (19749797-Table1)	GeneSigDB	7	3.32044	0.695787	0.0207192	0.0176765	YES	*+		*+	*+	*+	*+	*+			*+
ASTON_MAJOR_DEPRESSIVE_DISORDER_UP	MSigDB_C2	7	3.30965	0.399925	0.00863761	0.00943532	YES	*+/**	*+/**			*+/*+		*+/*+		*+/**	*+/*+	*+/**
Human StemCell_Matushansky08_886genes (18310505-TableS1)	GeneSigDB	7	3.30786	1.29463	0.00896466	0.0127344	YES	++	++	*+		*+		++		*+	++
V$TFIIA_Q6	MSigDB_C3	7	3.30368	0.815258	0.009865	0.0149974	YES	*+	*+	*+	*+	*+		*+			*+
V$SMAD3_Q6	MSigDB_C3	7	3.30124	1.12903	0.0118566	0.0157508	YES	*+	*+	*+		*+	*+	*+	*+
ACACTGG,MIR-199A,MIR-199B	MSigDB_C3	7	3.2992	0.476985	0.00542437	0.00885275	YES	++	*+			++	*+			*+	*+	*+
STK33_SKM_DN	MSigDB_C6	7	3.29891	0.639463	0.00606004	0.00883064	YES		++/++	**/++		*+/*+	*+/++	*+/*+			*+/*+	+*/++
V$SRF_Q5_01	MSigDB_C3	7	3.29385	0.661887	0.00574101	0.00704884	YES	*+	*+			*+	*+	*+		*+	*+
Human Breast_Shivapurkar08_43genes (18794132-Table1)	GeneSigDB	7	3.29033	0.948788	0.0191337	0.0197002	YES	*+	*+	*+	*+	*+	*+		*+
Human Breast_Sabatier10_368genes (20490655-ST3)	GeneSigDB	7	3.27802	1.05656	0.0107668	0.0154636	YES		++	++		++	++	++		++	*+
Mouse NeuronalCells_Provenzano10_158cells (20211691-TableS1)	GeneSigDB	7	3.27106	1.0185	0.0146726	0.0176132	YES	*+	*+	*+		-+		*+	*+	*+
MODULE_317	MSigDB_C4	7	3.26896	0.830883	0.00747125	0.0104592	YES	++	++		++		++	++	*+			++
GEORGES_TARGETS_OF_MIR192_AND_MIR215	MSigDB_C2	7	3.26714	0.906185	0.00772259	0.0122657	YES	++	++		++	*+		++		*+	*+
WOTTON_RUNX_TARGETS_DN	MSigDB_C2	7	3.26617	0.586246	0.014361	0.0117387	YES		**/*+	*+/*+		*+/*+	+*/*+	**/*+		++/*+	*+/*+
GRAESSMANN_RESPONSE_TO_MC_AND_SERUM_DEPRIVATION_UP	MSigDB_C2	7	3.26455	0.863297	0.00960033	0.0144025	YES	*+/**	*+/**	*+/**		*+/**	*+/**	*+/**			-+/**
TTGGGAG,MIR-150	MSigDB_C3	7	3.25962	0.683999	0.0100973	0.0119059	YES	*+	*+	*+	*+	*+	*+	*+
KIM_ALL_DISORDERS_OLIGODENDROCYTE_NUMBER_CORR_UP	MSigDB_C2	7	3.25927	1.48173	0.0123179	0.0127472	YES	++/**	*+/**		*+/**	*+/-*	*+/**				*+/**	*+/**
NERVOUS_SYSTEM_DEVELOPMENT	MSigDB_C5	7	3.25892	1.49469	0.0141591	0.0185006	YES	-+	-+	*+			-+	-+	*+			*+
Mouse Brain_Williams04_20genes (15466718-Table6)	GeneSigDB	7	3.25868	0.851745	0.0175464	0.0139611	YES	*+	*+			*+	*+	*+		*+	*+
Human Lymphoma_Islam02_39genes (11920564-Table4)	GeneSigDB	7	3.24999	0.748143	0.0185251	0.016186	YES		*+	++		*+		*+	*+		++	++
Mouse StemCell_vanderFlier09_134genes (19269367-TableS1)	GeneSigDB	7	3.23427	0.635736	0.00715631	0.00688847	YES	*+	*+	*+		*+	*+	*+				*+
REACTOME_DCC_MEDIATED_ATTRACTIVE_SIGNALING	MSigDB_C2	7	3.21829	0.447875	0.0274	0.0106769	YES		*+	*+			*+	*+	*+	*+		*+
PID_IL4_2PATHWAY	MSigDB_C2	7	3.20967	0.863106	0.0121867	0.0116371	YES	*+	++	*+		*+	*+	++		*+
ESC_V6.5_UP_LATE.V1_UP	MSigDB_C6	7	3.20814	0.696292	0.00692416	0.00920464	YES	*+/**	*+/+*	*+/**		-+/**	*+/**	-+/*+			*+/*+
VECCHI_GASTRIC_CANCER_EARLY_DN	MSigDB_C2	7	3.20777	1.69462	0.0120062	0.00917694	YES	+*/*+	+*/*+	**/*+	*-/*+			+-/*+		**/*+	+-/*+
REGULATION_OF_GTPASE_ACTIVITY	MSigDB_C5	7	3.19986	0.249861	0.0230114	0.0144545	YES	*+	*+			*+			*+	*+	*+	*+
TGCCAAR_V$NF1_Q6	MSigDB_C3	7	3.19272	1.28928	0.0113118	0.0133282	YES	*+	*+	*+	*+	-+	*+	*+
KEGG_PANTOTHENATE_AND_COA_BIOSYNTHESIS	MSigDB_C2	7	3.18547	0.581811	0.0221137	0.0136052	YES	*+	*+	*+		*+		*+		*+		*+
GACAATC,MIR-219	MSigDB_C3	7	3.18494	0.770099	0.00875225	0.011024	YES	++	*+			*+	++	++		*+	*+
MIKKELSEN_NPC_ICP_WITH_H3K4ME3	MSigDB_C2	7	3.17578	0.860382	0.0070925	0.00901228	YES	*+			++	*+	*+	++		*+	*+
V$PIT1_Q6	MSigDB_C3	7	3.16698	0.984698	0.0143309	0.0193261	YES	*+	*+	*+	*+			*+	*+	*+
RICKMAN_TUMOR_DIFFERENTIATED_MODERATELY_VS_POORLY_UP	MSigDB_C2	7	3.16239	0.660925	0.0104807	0.0132658	YES		*+/**	*+/**		*+/**	*+/**	++/+*		*+/**	*+/**
BIOCARTA_IL7_PATHWAY	MSigDB_C2	7	3.15765	0.567534	0.0237479	0.0179263	YES	*+			++	*+		*+	*+		*+	++
Human HeadandNeck_Thurlow10_31genes (20458058-TableS3a)	GeneSigDB	7	3.1559	0.749344	0.0183446	0.0135417	YES		*+	*+		*+	*+	*+		*+	*+
Human Leukemia_Davies03_41genes (12947006-Table2)	GeneSigDB	7	3.1492	1.07704	0.0240188	0.0169233	YES		++	*+		*+	*+		*+		*+	++
FEVR_CTNNB1_TARGETS_UP	MSigDB_C2	7	3.14259	0.495795	0.00393371	0.0042985	YES		*+/+*	*+/**		-+/+*	-+/**	*+/+*	*+/+*		*+/+*
WATTEL_AUTONOMOUS_THYROID_ADENOMA_DN	MSigDB_C2	7	3.13754	0.889359	0.0134222	0.0107707	YES	**/*+	**/*+	**/*+	**/*+	**/*+		**/*+			**/*+
BENPORATH_NANOG_TARGETS	MSigDB_C2	7	3.1299	1.02154	0.0105007	0.0163124	YES	++	++			++	*+	++			*+	*+
V$CHOP_01	MSigDB_C3	7	3.12597	0.78054	0.0105139	0.0131953	YES	*+	*+	-+			*+	*+			-+	*+
PID_ERBB1_INTERNALIZATION_PATHWAY	MSigDB_C2	7	3.12183	0.947167	0.0191282	0.0193819	YES	*+	*+		*+	*+		*+		*+		*+
YAO_TEMPORAL_RESPONSE_TO_PROGESTERONE_CLUSTER_0	MSigDB_C2	7	3.11669	1.19164	0.0183705	0.0168636	YES		*+		*+	*+		*+		*+	*+	*+
REACTOME_CELL_SURFACE_INTERACTIONS_AT_THE_VASCULAR_WALL	MSigDB_C2	7	3.11365	0.675853	0.0123372	0.0145471	YES		*+	*+		*+	*+	*+		*+	*+
V$FOXD3_01	MSigDB_C3	7	3.10848	0.669186	0.00964546	0.0151982	YES		*+		++	*+	*+	*+		*+	*+
Human Ovariain_Zhang05_38genes (16093247-Table2)	GeneSigDB	7	3.10648	1.02754	0.0229384	0.0139173	YES		*+	*+		-+		*+	*+		*+	++
V$FOXO1_02	MSigDB_C3	7	3.10568	0.838142	0.0131763	0.0167299	YES			*+		*+	*+	*+	*+		*+	*+
Rat StemCell_KaplanAlbuquerque_98genes (15774477-Table2)	GeneSigDB	7	3.10095	0.931944	0.0206707	0.0196204	YES	*+	*+	*+			*+	*+	*+	*+
BLALOCK_ALZHEIMERS_DISEASE_DN	MSigDB_C2	7	3.10009	0.961504	0.010382	0.0152683	YES	++/++	++/++		**/*+	*+/++	*+/*+				*+/*+	++/*+
IVANOVA_HEMATOPOIESIS_STEM_CELL	MSigDB_C2	7	3.09992	1.00551	0.0136913	0.0178523	YES	*+	*+	++		*+	*+	*+			*+
CHYLA_CBFA2T3_TARGETS_UP	MSigDB_C2	7	3.09451	0.738585	0.0101019	0.0142429	YES		++/*+		*+/**	*+/*+	*+/*+	++/-+	*+/**			*+/**
BRUECKNER_TARGETS_OF_MIRLET7A3_UP	MSigDB_C2	7	3.07932	0.915623	0.0139526	0.0153702	YES	*+/**	*+/++			*+/*+	*+/*+	*+/*+			*+/*+	++/*+
ELLWOOD_MYC_TARGETS_DN	MSigDB_C2	7	3.07557	0.529301	0.0160931	0.0142142	YES		**/++		**/*+	**/*+	**/*+	**/*+	**/*+			**/*+
Human Prostate_Gu05_120genes (15788672-Table1)	GeneSigDB	7	3.07286	0.722719	0.0144867	0.0152186	YES	*+				*+		*+	*+	*+	*+	*+
DORSEY_GAB2_TARGETS	MSigDB_C2	7	3.07093	0.781407	0.0192625	0.0148249	YES		*+	++		*+	++	++		++	*+
HUANG_FOXA2_TARGETS_DN	MSigDB_C2	7	3.05738	0.465306	0.0186877	0.0109167	YES			*+/*+			*+/*+	*+/*+	+*/*+	**/*+	*+/*+	**/*+
V$SRF_C	MSigDB_C3	7	3.05549	1.20224	0.0183769	0.0199597	YES	*+	*+			-+	*+	*+		*+	*+
ERB2_UP.V1_UP	MSigDB_C6	7	3.05278	1.14962	0.0191272	0.0192866	YES		*+/++			*+/+*	*+/+*	*+/+*		*+/*+	*+/**	*+/++
Human Breast_Reyal08_159genes (19014521-TableS6b)	GeneSigDB	7	3.04975	0.937117	0.0142737	0.0156439	YES	*+	++	*+			++	++		++	*+
Human Manning02_624genes_ProteinKinases (12471243-TableS2)	GeneSigDB	7	3.046	0.979663	0.0139797	0.0183874	YES	++	++			*+	++	++		++	*+
AKT_UP_MTOR_DN.V1_DN	MSigDB_C6	7	3.03852	0.677608	0.00842688	0.00761845	YES	**/*+	**/*+			**/*+	**/*+	**/*+	**/*+		**/++
IVANOVA_HEMATOPOIESIS_STEM_CELL_AND_PROGENITOR	MSigDB_C2	7	3.03767	0.656341	0.00641007	0.00677267	YES	*+	*+	*+		*+	++	*+		*+
Human Breast_Loi08_239genes (18498629-GeneList)	GeneSigDB	7	3.03565	0.593934	0.00972346	0.0123872	YES	*+	*+	*+		*+		++		*+	*+
MODULE_72	MSigDB_C4	7	3.02161	0.959738	0.0117826	0.0135514	YES	++	*+	*+		*+	*+	++			*+
Rat Prostate_Reyes05_189genes (15486989-table2)	GeneSigDB	7	3.02046	1.03961	0.0184717	0.0189959	YES	++	++	++		*+	*+	++			*+
Human Stomach_Hofsli05_101genes (15846300-SuppTable2)	GeneSigDB	7	3.01694	0.613713	0.0144781	0.0185876	YES		++	*+		*+	*+	++		*+	*+
Human Viral_Cairo08_169genes (19061838-TableS15)	GeneSigDB	7	3.01677	0.656538	0.0105112	0.0103672	YES	*+	*+	*+	*+			*+			*+	*+
QI_PLASMACYTOMA_UP	MSigDB_C2	7	3.01657	0.891388	0.0119553	0.0134567	YES	++/**	++/*+			*+/*+	++/*+			++/*+	*+/**	++/+*
KIM_GERMINAL_CENTER_T_HELPER_UP	MSigDB_C2	7	3.01655	0.531982	0.0115833	0.00975284	YES	*+/**	*+/**			*+/**		*+/*+		*+/**	*+/**	*+/*+
DE_YY1_TARGETS_DN	MSigDB_C2	7	3.01207	0.658183	0.0132057	0.0127472	YES	**/*+	**/*+	**/*+		**/*+	**/*+	**/++		**/*+
Human Immune_Kulaeva_03_85genes (12821946-Table5)	GeneSigDB	7	3.00733	0.753882	0.0120796	0.0103301	YES	*+	*+	*+		*+	*+	++			*+
Human Prostate_Best05_256genes (16203770-TableS1)	GeneSigDB	7	3.00697	0.754514	0.0127193	0.0175276	YES	*+	*+	*+		*+	*+			*+	*+
Tcell_cytokine_induced_PMBC_Bcell_induced	SignatureDB	7	3.00289	0.895674	0.0234817	0.0146556	YES	++	++		++	*+	*+				*+	++
KERLEY_RESPONSE_TO_CISPLATIN_UP	MSigDB_C2	7	2.99904	0.625538	0.0145119	0.0102764	YES	*+/**	*+/**			*+/**		*+/**	*+/**	*+/**	*+/**
MODULE_37	MSigDB_C4	7	2.99623	0.790114	0.0130172	0.019123	YES	*+	*+		++		++	++	*+			*+
ZHAN_MULTIPLE_MYELOMA_CD1_VS_CD2_DN	MSigDB_C2	7	2.99539	0.487072	0.0175149	0.0163766	YES		**/++		+*/*+	**/*+	**/++		**/*+	+*/*+	**/*+
PID_NETRIN_PATHWAY	MSigDB_C2	7	2.98318	0.410195	0.0200202	0.0148919	YES		*+		*+	*+	*+	*+		*+		*+
Human UmbilicalCordBloodCells_Miyagawa09_145genes (20067540-Table3)	GeneSigDB	7	2.98205	0.852063	0.0156182	0.0170007	YES	*+	*+			*+	*+	*+			*+	*+
BIOCARTA_MET_PATHWAY	MSigDB_C2	7	2.96273	0.662666	0.0204447	0.0126442	YES				*+	*+	*+	*+	*+		*+	*+
SASAKI_ADULT_T_CELL_LEUKEMIA	MSigDB_C2	7	2.9614	0.672057	0.0113117	0.00869044	YES	++	++	++			*+			*+	++	++
LIU_VMYB_TARGETS_UP	MSigDB_C2	7	2.95382	0.739863	0.0145453	0.0154223	YES	++	++			++		++		*+	*+	*+
V$CRX_Q4	MSigDB_C3	7	2.94544	0.450445	0.00805505	0.00558743	YES	*+	*+	*+			*+	*+		*+		*+
Human Endometrial_Maxwell05_66genes (15930340-Table1)	GeneSigDB	7	2.94356	0.580763	0.0221754	0.0173457	YES		*+	*+	*+			*+	*+	++	*+
REACTOME_GPVI_MEDIATED_ACTIVATION_CASCADE	MSigDB_C2	7	2.9339	0.636318	0.0207634	0.0153157	YES	*+	*+			*+		++	*+	*+	*+
KEGG_FC_GAMMA_R_MEDIATED_PHAGOCYTOSIS	MSigDB_C2	7	2.93118	0.760474	0.0173161	0.0156136	YES	*+	*+			*+	*+		*+	*+	++
LE_EGR2_TARGETS_DN	MSigDB_C2	7	2.92995	0.587907	0.0132876	0.0136119	YES	**/*+	**/*+	**/*+		**/-+	**/*+	+*/*+			**/-+
V$HLF_01	MSigDB_C3	7	2.92895	0.86462	0.0153069	0.0161498	YES	*+	*+	++		*+	*+	++		*+
Human Breast_Itoh05_98genes (15831674-Table1)	GeneSigDB	7	2.92689	0.578582	0.0161763	0.0146837	YES	*+	*+			*+	*+	*+			*+	*+
V$GFI1_01	MSigDB_C3	7	2.92497	1.09665	0.0180376	0.0201925	YES	-+	*+	*+		-+		*+		*+	*+
DOUGLAS_BMI1_TARGETS_DN	MSigDB_C2	7	2.92053	0.884143	0.015973	0.0188676	YES	++/++	++/*+			*+/++		++/++		**/*+	**/*+	**/*+
ALFANO_MYC_TARGETS	MSigDB_C2	7	2.91802	0.729119	0.0131805	0.0162414	YES		++	*+		++	*+	++		*+	*+
V$MEF2_Q6_01	MSigDB_C3	7	2.90814	0.880154	0.0134805	0.0118437	YES	*+	*+	*+		*+		*+		*+	*+
Human Colon_Craene05_25genes (16024625-SuppTable2b)	GeneSigDB	7	2.90801	0.478273	0.02996	0.0136702	YES	*+	*+			*+	*+		*+	*+		*+
RAO_BOUND_BY_SALL4	MSigDB_C2	7	2.90762	0.595283	0.0110907	0.0134506	YES	++	++			*+	*+	++			*+	*+
Human Pancreas_Levy05_114genes (16135802-Table1)	GeneSigDB	7	2.90507	0.657341	0.0160515	0.0159681	YES	*+	*+	*+		*+	*+	*+			*+
V$MEF2_01	MSigDB_C3	7	2.89469	1.47244	0.025709	0.02029	YES	*+	*+	*+		*+		*+		*+	*+
chr1q41	MSigDB_C1	7	2.89369	0.511414	0.0251024	0.0155147	YES		*+			*+	*+		*+	*+	*+	*+
ALCALAY_AML_BY_NPM1_LOCALIZATION_DN	MSigDB_C2	7	2.87651	0.772087	0.0153517	0.0154637	YES	-+/*+	*+/++		**/*+	*+/*+				*+/*+	*+/++	**/*+
CAGCTTT,MIR-320	MSigDB_C3	7	2.87133	0.723511	0.0131865	0.0122952	YES	*+	*+	*+		*+		*+		*+	*+
HUMMERICH_SKIN_CANCER_PROGRESSION_DN	MSigDB_C2	7	2.86875	0.543204	0.0138263	0.0167622	YES	**/*+	*+/*+	**/*+		*+/*+	*+/*+	++/*+			*+/*+
REGULATION_OF_SIGNAL_TRANSDUCTION	MSigDB_C5	7	2.86585	0.841173	0.0158541	0.0165003	YES	*+	*+			*+	*+	*+			*+	*+
WANG_LMO4_TARGETS_UP	MSigDB_C2	7	2.85108	0.63505	0.0120146	0.0147898	YES	++/**	++/+*			*+/**	++/**	++/+*		++/**	++/**
GCANCTGNY_V$MYOD_Q6	MSigDB_C3	7	2.84816	0.7512	0.0100469	0.0103913	YES	*+	*+			*+	*+	*+	*+	*+
GRAESSMANN_APOPTOSIS_BY_SERUM_DEPRIVATION_UP	MSigDB_C2	7	2.84093	0.549752	0.0108799	0.0169175	YES		++/**	++/**		++/**	*+/**	++/**		++/**	*+/**
IWANAGA_CARCINOGENESIS_BY_KRAS_DN	MSigDB_C2	7	2.83173	0.549309	0.0155132	0.0150137	YES	**/*+	**/*+		**/*+	**/*+		*+/++		**/*+		--/*+
PETROVA_ENDOTHELIUM_LYMPHATIC_VS_BLOOD_UP	MSigDB_C2	7	2.82982	0.619298	0.013666	0.0107224	YES	*+/++	*+/*+			*+/*+		*+/*+		*+/*+	*+/*+	++/*+
Human Leukemia_Sasaki05_192genes (15471956-Table2)	GeneSigDB	7	2.82453	0.843235	0.0166653	0.0151881	YES	++	++			++	*+			*+	++	++
WANG_SMARCE1_TARGETS_DN	MSigDB_C2	7	2.8165	0.829442	0.0163785	0.020163	YES	*+/++	-+/++			-+/++	*+/*+	-+/++		*+/*+	*+/*+
YTAATTAA_V$LHX3_01	MSigDB_C3	7	2.81016	1.1256	0.0202223	0.0164592	YES	*+	*+	*+		*+	*+	*+				*+
PID_VEGFR1_2_PATHWAY	MSigDB_C2	7	2.80957	0.56	0.0192749	0.0172671	YES		*+		*+	*+	++	*+			++	*+
GAVIN_FOXP3_TARGETS_CLUSTER_P3	MSigDB_C2	7	2.80674	0.805664	0.0183074	0.0169258	YES	*+	*+			*+	*+	++			*+	++
YYCATTCAWW_UNKNOWN	MSigDB_C3	7	2.80053	0.665921	0.0131286	0.0151175	YES	*+	*+			*+	++	*+		*+	*+
TAAWWATAG_V$RSRFC4_Q2	MSigDB_C3	7	2.79851	0.632799	0.0152907	0.0136687	YES	*+	*+	*+		*+		*+	*+		*+
MODULE_389	MSigDB_C4	7	2.79765	0.402543	0.0130098	0.0154037	YES	*+	*+		*+		*+		*+	*+		*+
Human Leukemia_Wilson06_50genes_DifferentialClusterF (16597596-TableS1-6)	GeneSigDB	7	2.79724	0.42383	0.0242984	0.0154018	YES			*+		*+	*+	++		*+	*+	*+
V$OCT_Q6	MSigDB_C3	7	2.78733	0.794655	0.0161246	0.0135987	YES	*+	*+	*+		*+	*+	*+		++
LTE2_UP.V1_UP	MSigDB_C6	7	2.78433	1.04327	0.0189609	0.0142733	YES	++/**	++/+*			*+/*+	++/++	*+/+*			*+/*+	++/**
Mouse StemCell_Tseng05_37genes (15895078-Table2)	GeneSigDB	7	2.77962	0.43183	0.0242549	0.0129122	YES		*+	*+	*+	*+	*+	*+		*+
LEADING_EDGE	MSigDB_C5	7	2.76855	0.653828	0.0265387	0.0191106	YES	*+				*+	*+	*+	*+		*+	*+
TGCACTG,MIR-148A,MIR-152,MIR-148B	MSigDB_C3	7	2.76029	0.954961	0.0193072	0.0185972	YES	*+	*+			*+	*+	*+		*+	*+
DELASERNA_MYOD_TARGETS_UP	MSigDB_C2	7	2.75503	0.633477	0.0190834	0.0142145	YES	*+/**	*+/*+				*+/*+	++/++		*+/+*	*+/**	*+/+*
DUTERTRE_ESTRADIOL_RESPONSE_6HR_UP	MSigDB_C2	7	2.7489	0.480762	0.0133541	0.00893025	YES		++/*+	*+/*+	++/*+	++/-+	++/*+	++/*+				++/*+
V$MEF2_02	MSigDB_C3	7	2.7376	0.864041	0.0195776	0.0192007	YES	*+	*+	*+		*+		*+	*+		*+
STK33_DN	MSigDB_C6	7	2.73722	0.693691	0.0166975	0.0139869	YES		++/++			*+/*+	*+/*+	*+/*+	**/++		*+/*+	+*/++
KEGG_SMALL_CELL_LUNG_CANCER	MSigDB_C2	7	2.71204	0.507596	0.0193346	0.0142977	YES	*+	*+	*+		*+	*+	*+		*+
TCCATTKW_UNKNOWN	MSigDB_C3	7	2.69575	0.643436	0.0155662	0.015677	YES	*+	*+	*+		*+		*+		++	*+
DODD_NASOPHARYNGEAL_CARCINOMA_UP	MSigDB_C2	7	2.69312	0.738858	0.0143623	0.0139543	YES		-+/+*	*+/**	*+/*-			-+/+-	*+/+-	-+/+*	*+/**
Human Prostate_Bienkowska09_79genes (19699293-TableS7)	GeneSigDB	7	2.6746	0.632027	0.0285215	0.0196602	YES	*+	*+	*+		++		++	*+			*+
V$NFKAPPAB_01	MSigDB_C3	7	2.6733	0.529945	0.0162797	0.0149572	YES		*+			*+	*+	++	++	*+	*+
LIU_CMYB_TARGETS_UP	MSigDB_C2	7	2.66129	0.45111	0.0158596	0.0105366	YES	++/+*	++/**		*+/**	*+/*+		++/**			++/*+	++/**
Human Breast_Walker10_3588genes (20174566-TableS1)	GeneSigDB	7	2.65487	0.634186	0.0136924	0.0188655	YES	++	++		++	++				++	++	++
CTGYNNCTYTAA_UNKNOWN	MSigDB_C3	7	2.64318	0.412212	0.0237601	0.0153589	YES	*+	*+	*+	*+		*+		*+		*+
PID_AR_TF_PATHWAY	MSigDB_C2	7	2.63311	0.394566	0.0262374	0.0151067	YES	*+	*+	*+	*+			*+			*+	*+
DOUGLAS_BMI1_TARGETS_UP	MSigDB_C2	7	2.62489	2.22247	0.0105647	0.0161511	NO	++/++	++/*+	*+/+*	+-/**	*+/++	*+/+*	++/++
LEE_LIVER_CANCER_ACOX1_UP	MSigDB_C2	7	2.62256	0.575095	0.0267932	0.0188727	YES	*+/**	*+/**			-+/**	*+/**		*+/**		*+/**	*+/**
V$HNF6_Q6	MSigDB_C3	7	2.61764	0.388956	0.0151954	0.00872485	YES	*+	*+		*+			*+		*+	*+	*+
Human Lung_Daniel09_314genes (19351829-SuppTableA)	GeneSigDB	7	2.6116	0.503442	0.0159878	0.0156905	YES		++			*+	*+	++		*+	*+	++
Mouse StemCell_Ulloa-Montoya07_775genes (17683608-TableS4)	GeneSigDB	7	2.6112	0.832132	0.0220079	0.0203047	YES		++			*+	++	++	*+		*+	++
V$OCT1_03	MSigDB_C3	7	2.58662	0.453493	0.0155624	0.0100896	YES	*+	*+		*+	*+	*+	*+			-+
RGAANNTTC_V$HSF1_01	MSigDB_C3	7	2.58071	0.669953	0.0206927	0.0202196	YES	*+	*+		*+			*+		++	*+	*+
Human Lymphoma_Sriuranpong04_373genes (15297395-SuppTable2)	GeneSigDB	7	2.57213	0.512172	0.0169127	0.0145632	YES	*+	*+	*+		*+	++	*+			*+
Rat Immune_Rioja04_438genes (15642130-TableS1)	GeneSigDB	7	2.56687	0.815814	0.0216374	0.0174411	YES	*+	*+			*+	*+	++			*+	++
GCNP_SHH_UP_EARLY.V1_DN	MSigDB_C6	7	2.56414	0.438763	0.0189764	0.0119583	YES	**/*+	**/*+	**/*+		**/-+	**/-+				**/-+	**/*+
FARMER_BREAST_CANCER_APOCRINE_VS_LUMINAL	MSigDB_C2	7	2.52364	0.504688	0.0197674	0.0163568	YES				++	*+	*+	*+		*+	*+	++
Human Brain_Godard03_239genes (14583454-TableS1)	GeneSigDB	7	2.4976	0.473396	0.020198	0.0165442	YES	*+	*+	*+		*+	*+	++		*+
V$HNF3ALPHA_Q6	MSigDB_C3	7	2.4762	0.205616	0.0203245	0.00711099	YES			*+	++		++	*+		*+	*+	++
GATAAGR_V$GATA_C	MSigDB_C3	7	2.46482	0.513409	0.0203971	0.0148163	YES	-+	-+		*+	-+		-+			-+	*+
MYC_UP.V1_DN	MSigDB_C6	7	2.44964	2.03835	0.0162471	0.0193052	NO	+*/*+	+*/*+	**/--		+-/*+	+*/*+	+*/-+	**/*+
chr12q24	MSigDB_C1	7	2.41425	0.541908	0.0267098	0.0184554	YES	*+	*+		*+		*+	++	*+			*+
TGTTTGY_V$HNF3_Q6	MSigDB_C3	7	2.3917	0.545593	0.0214538	0.0176586	YES		*+	*+	*+	*+	*+	*+			*+
V$AP1_01	MSigDB_C3	7	2.34863	0.3713	0.0249738	0.0149539	YES		*+		*+	*+		*+	*+	*+		*+
V$TAL1BETAE47_01	MSigDB_C3	7	2.3359	0.224198	0.023767	0.0105206	YES	*+	*+	*+	++			*+		*+	*+
IRF3_target_gene	SignatureDB	7	2.32064	0.403003	0.0262708	0.0122989	YES	++	++			*+	*+	++			*+	++
Human Lymphoma_VanLoo09_407genes (19797726-SuppTable1b)	GeneSigDB	7	0.169192	4.48598	0.00550061	0.00616927	NO	+-	+-	*-			-+	+-	*-		-+
V$NRF2_01	MSigDB_C3	7	-2.0292	0.333986	0.026683	0.017283	YES		+-	*-	*-		*-	+-	*-		*-
Myc_ChIP_PET_Expr_UP	SignatureDB	7	-2.17938	0.363236	0.0197518	0.0169931	YES		+-/++	*-/++	+-/++	+-/*+		+-/++	*-/*+		+-/++
MIPS_SPLICEOSOME	MSigDB_C2	7	-2.21399	0.42324	0.017615	0.0134843	YES		*-		*-	+-	*-	+-		*-	*-
MORF_RFC4	MSigDB_C4	7	-2.26132	0.577468	0.0215424	0.0196593	YES	+-		*-	*-	+-		+-		*-	*-
Leucine_starve_DN	SignatureDB	7	-2.42907	0.591501	0.0152935	0.0161786	YES	++/+-	++/+-			*+/+-		++/+-	*+/+-		*+/+-	*+/+-
PENG_LEUCINE_DEPRIVATION_DN	MSigDB_C2	7	-2.43675	0.633128	0.0119401	0.0114682	YES	++/+-	*+/+-		*+/+-			*+/+-		*+/*-	*+/+-	*+/+-
RIBONUCLEOPROTEIN_COMPLEX	MSigDB_C5	7	-2.43982	0.566743	0.012972	0.0154334	YES		+-		*-	+-	*-	+-		*-	*-
NUCLEAR_PART	MSigDB_C5	7	-2.64132	0.68363	0.0103458	0.0140497	YES			--		+-	*-	+-	*-	*-	*-
Human Breast_Dairkee04_479genes (15260889-TableS2a)	GeneSigDB	7	-2.68679	0.605379	0.00808137	0.0106057	YES		+-	*-		+-	--	+-		*-	+-
MIKKELSEN_MEF_HCP_WITH_H3K27ME3	MSigDB_C2	7	-2.94087	0.60529	0.00310927	0.00442013	YES	--	--			--	--			*-	--	--
RUTELLA_RESPONSE_TO_HGF_VS_CSF2RB_AND_IL4_UP	MSigDB_C2	6	6.62453	4.90617	0.00856061	0.0168233	YES	++/++				++/*+	*+/++	++/++			*+/*+	++/++
WONG_ENDMETRIUM_CANCER_DN	MSigDB_C2	6	5.91735	1.56584	0.000104928	0.00019857	YES	**/-+	**/*+	**/*+		**/-+		**/-+			**/*+
LINDGREN_BLADDER_CANCER_HIGH_RECURRENCE	MSigDB_C2	6	5.67215	2.25074	0.0035744	0.00749784	YES		*+	*+		-+	*+	*+			*+
NIELSEN_SCHWANNOMA_DN	MSigDB_C2	6	5.37936	1.46866	0.00113951	0.00189539	YES		**/*+	**/*+		**/*+	**/*+	**/*+			**/*+
MORI_PLASMA_CELL_DN	MSigDB_C2	6	5.33071	2.0086	0.00698064	0.0167422	YES	+*/*+	+*/*+					+-/*+	**/*+	+*/*+		**/*+
MODULE_190	MSigDB_C4	6	5.15336	1.71774	0.00541738	0.00885747	YES	*+	*+	*+		*+			*+		*+
[truncated: 3,658 more rows]
